# Supplementary material for: Computational identification of microRNA gene loci and precursor microRNA sequences in CHO cell lines
Source: PubMed Central journal article supplement — J Biotechnol. 2012 Apr 15;158(3):151–5. doi: 10.1016/j.jbiotec.2012.01.019 (PMC3314935; doi:10.1016/j.jbiotec.2012.01.019), 2012-04-15

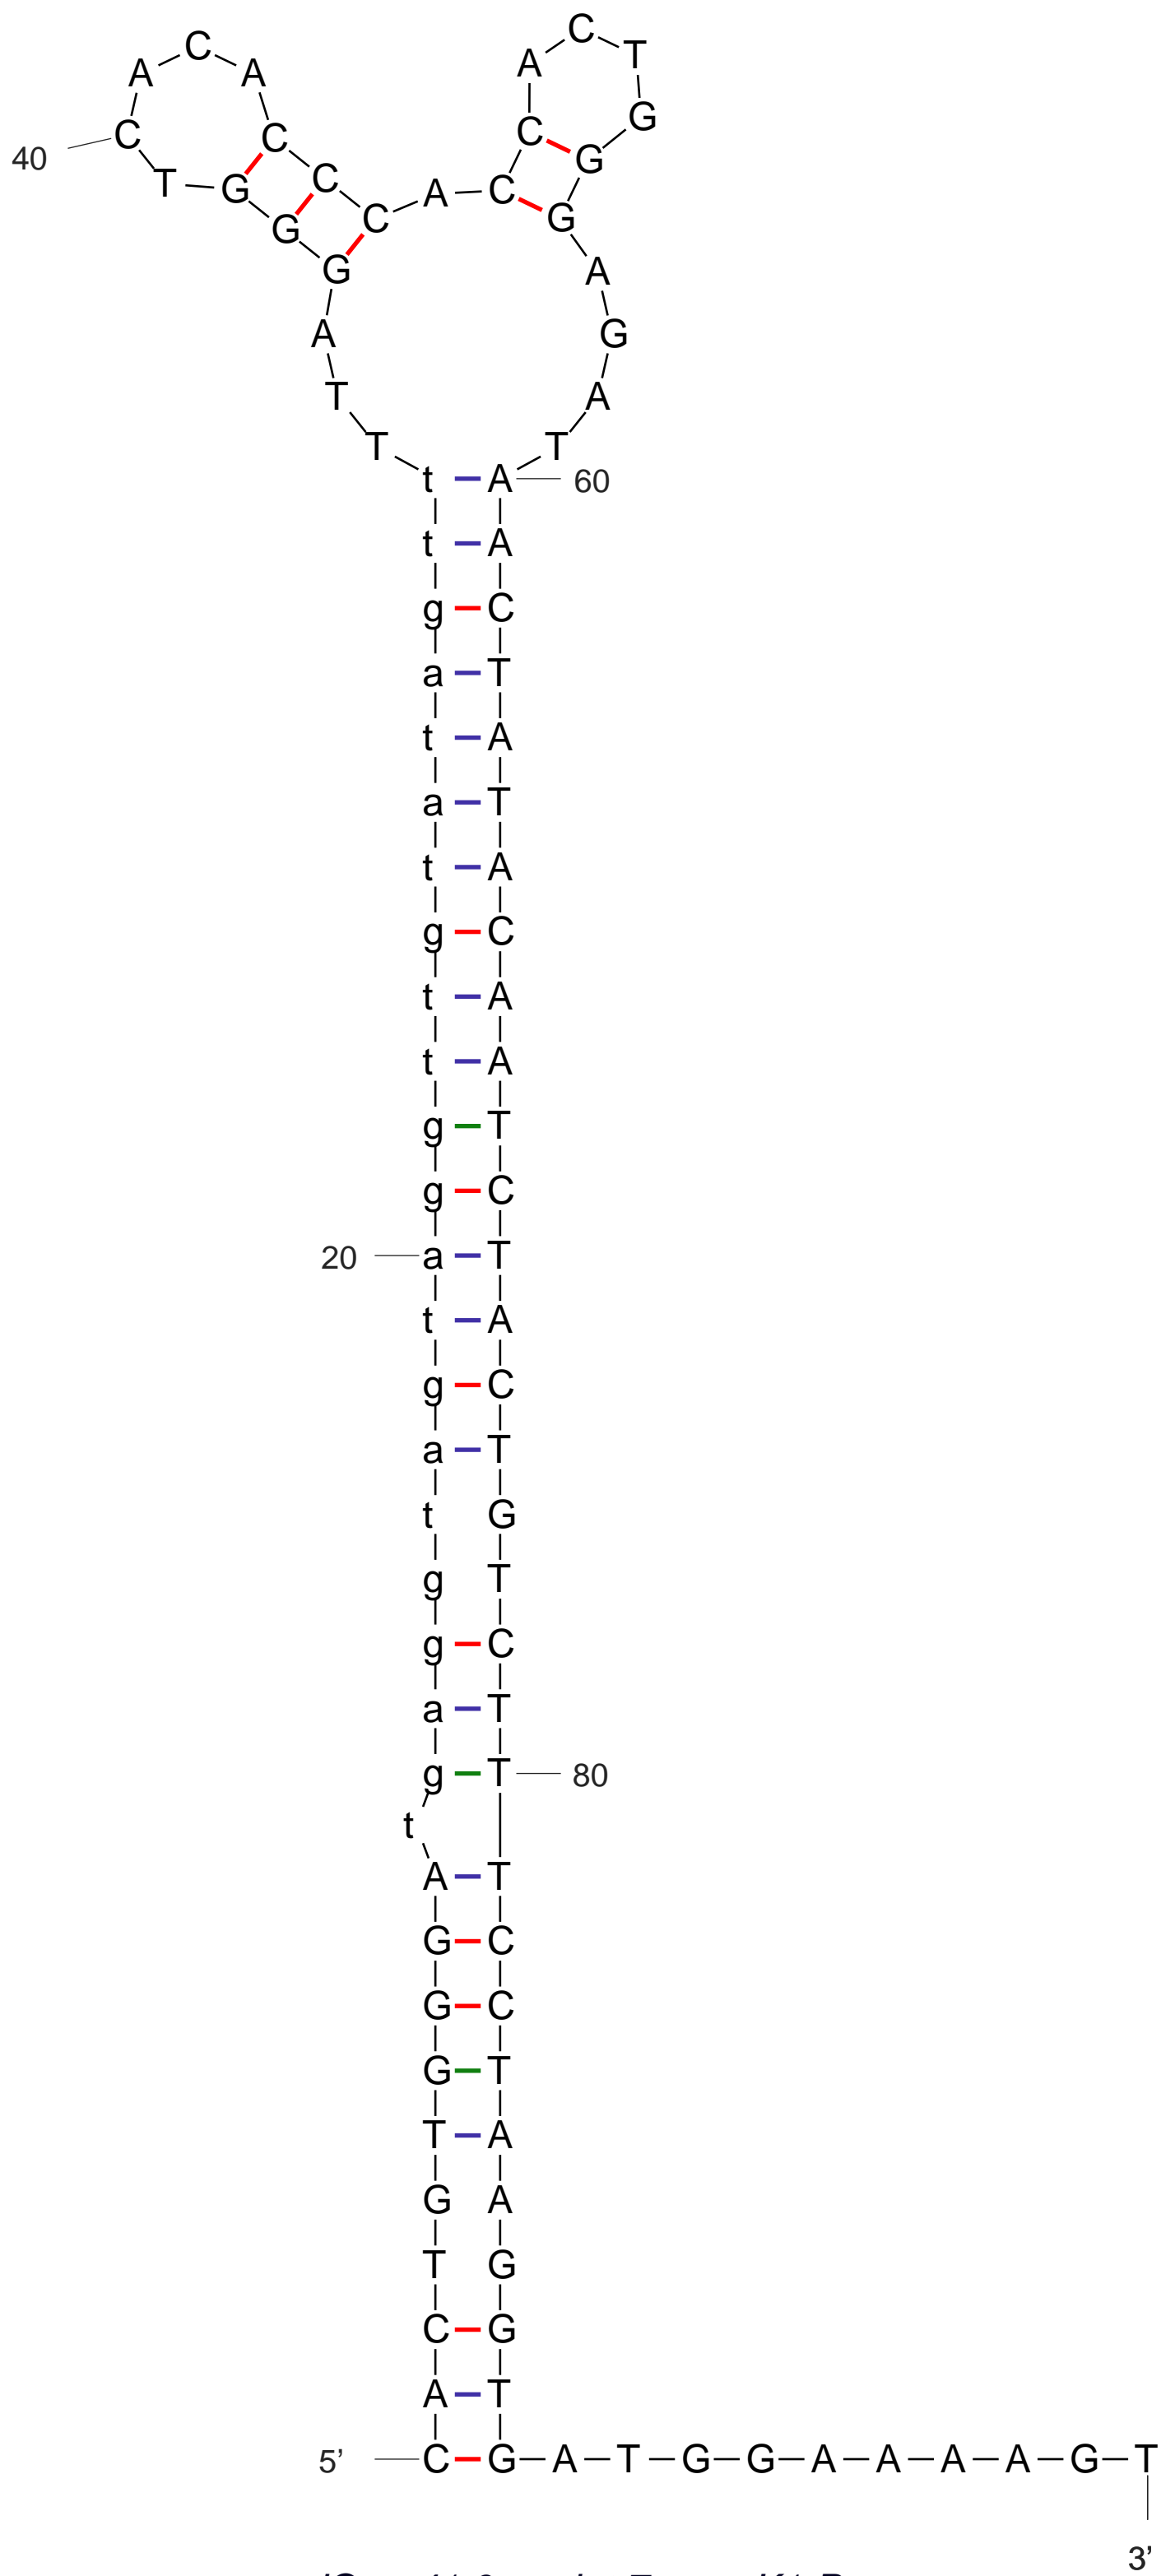

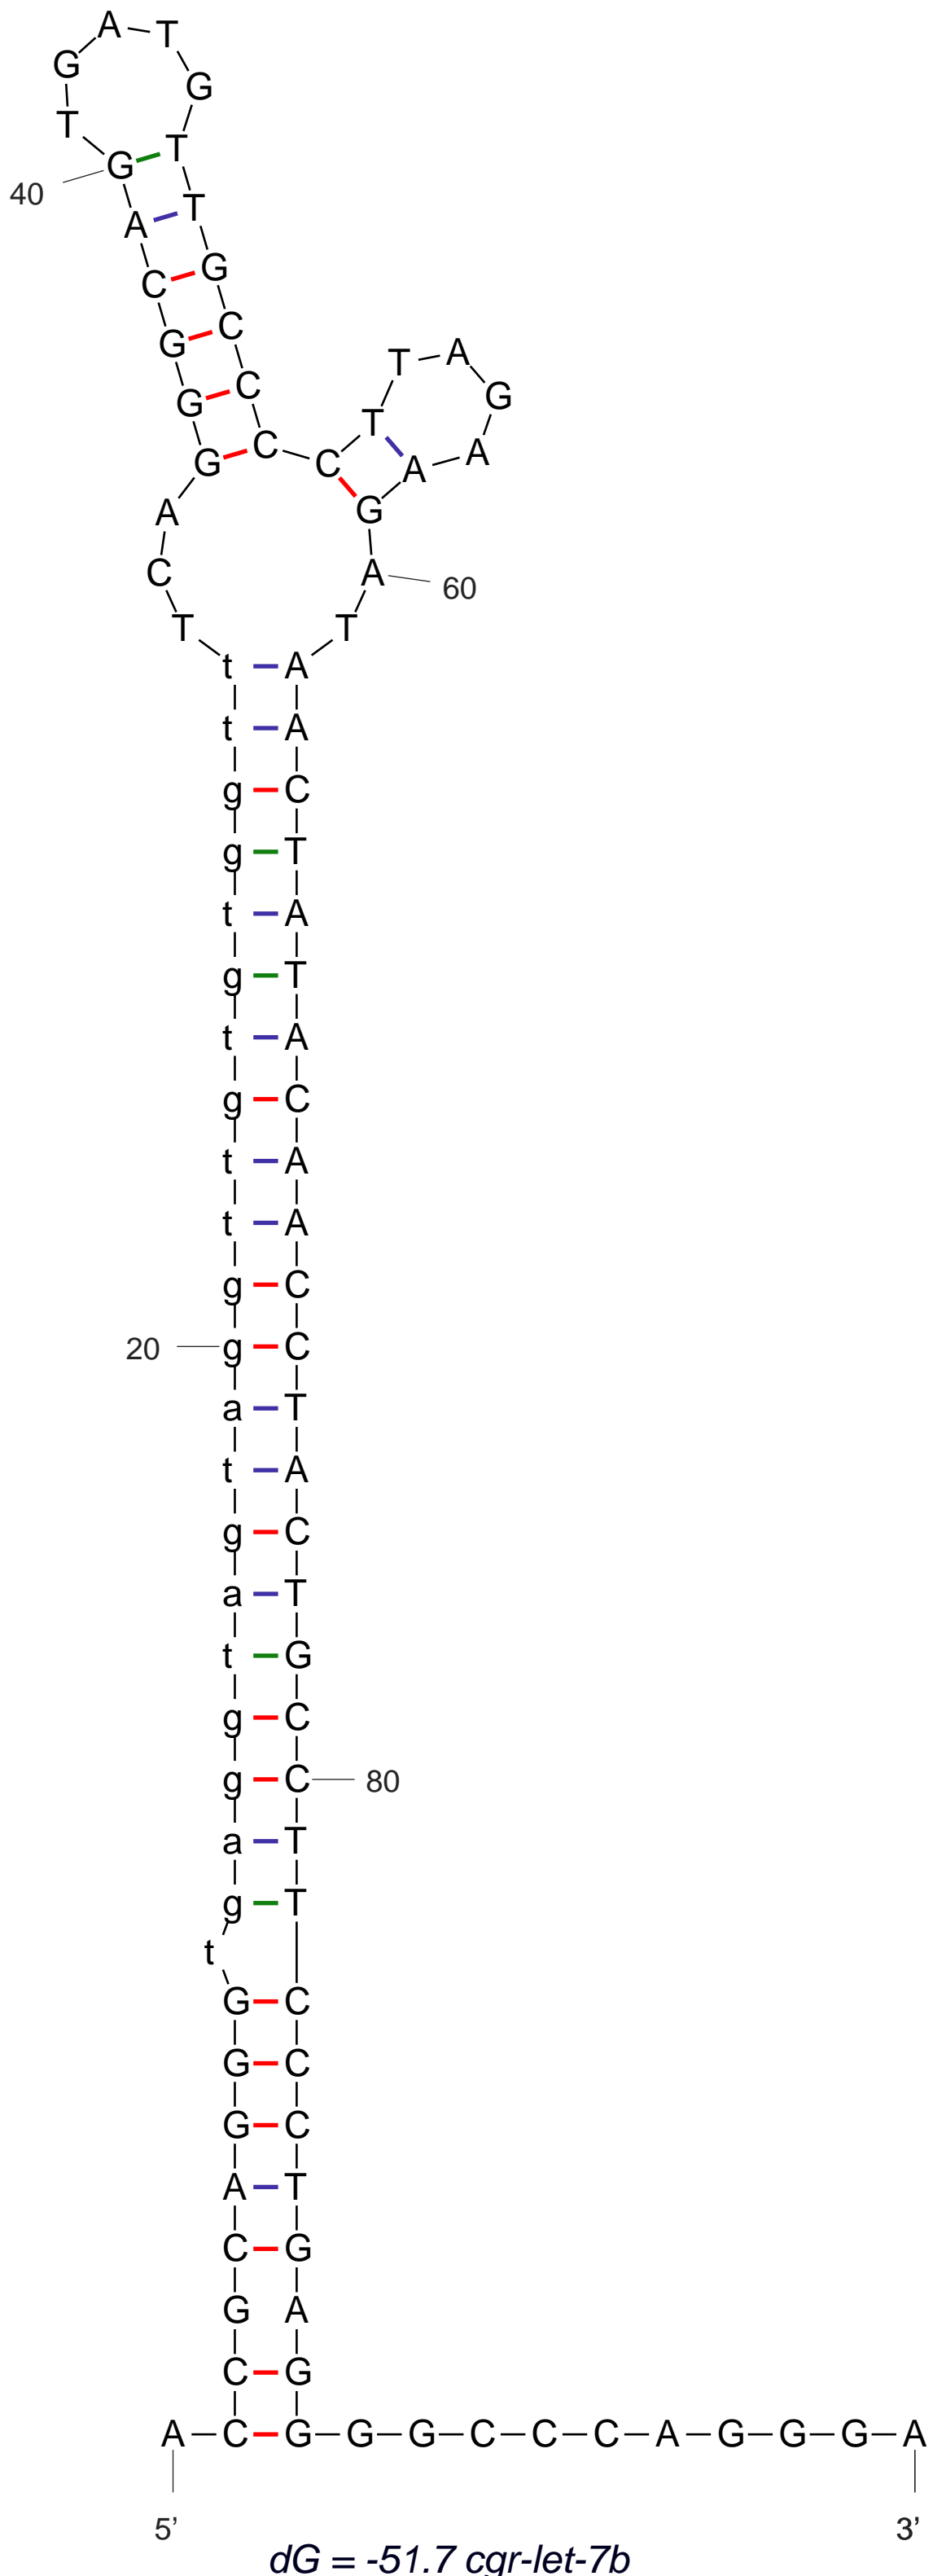



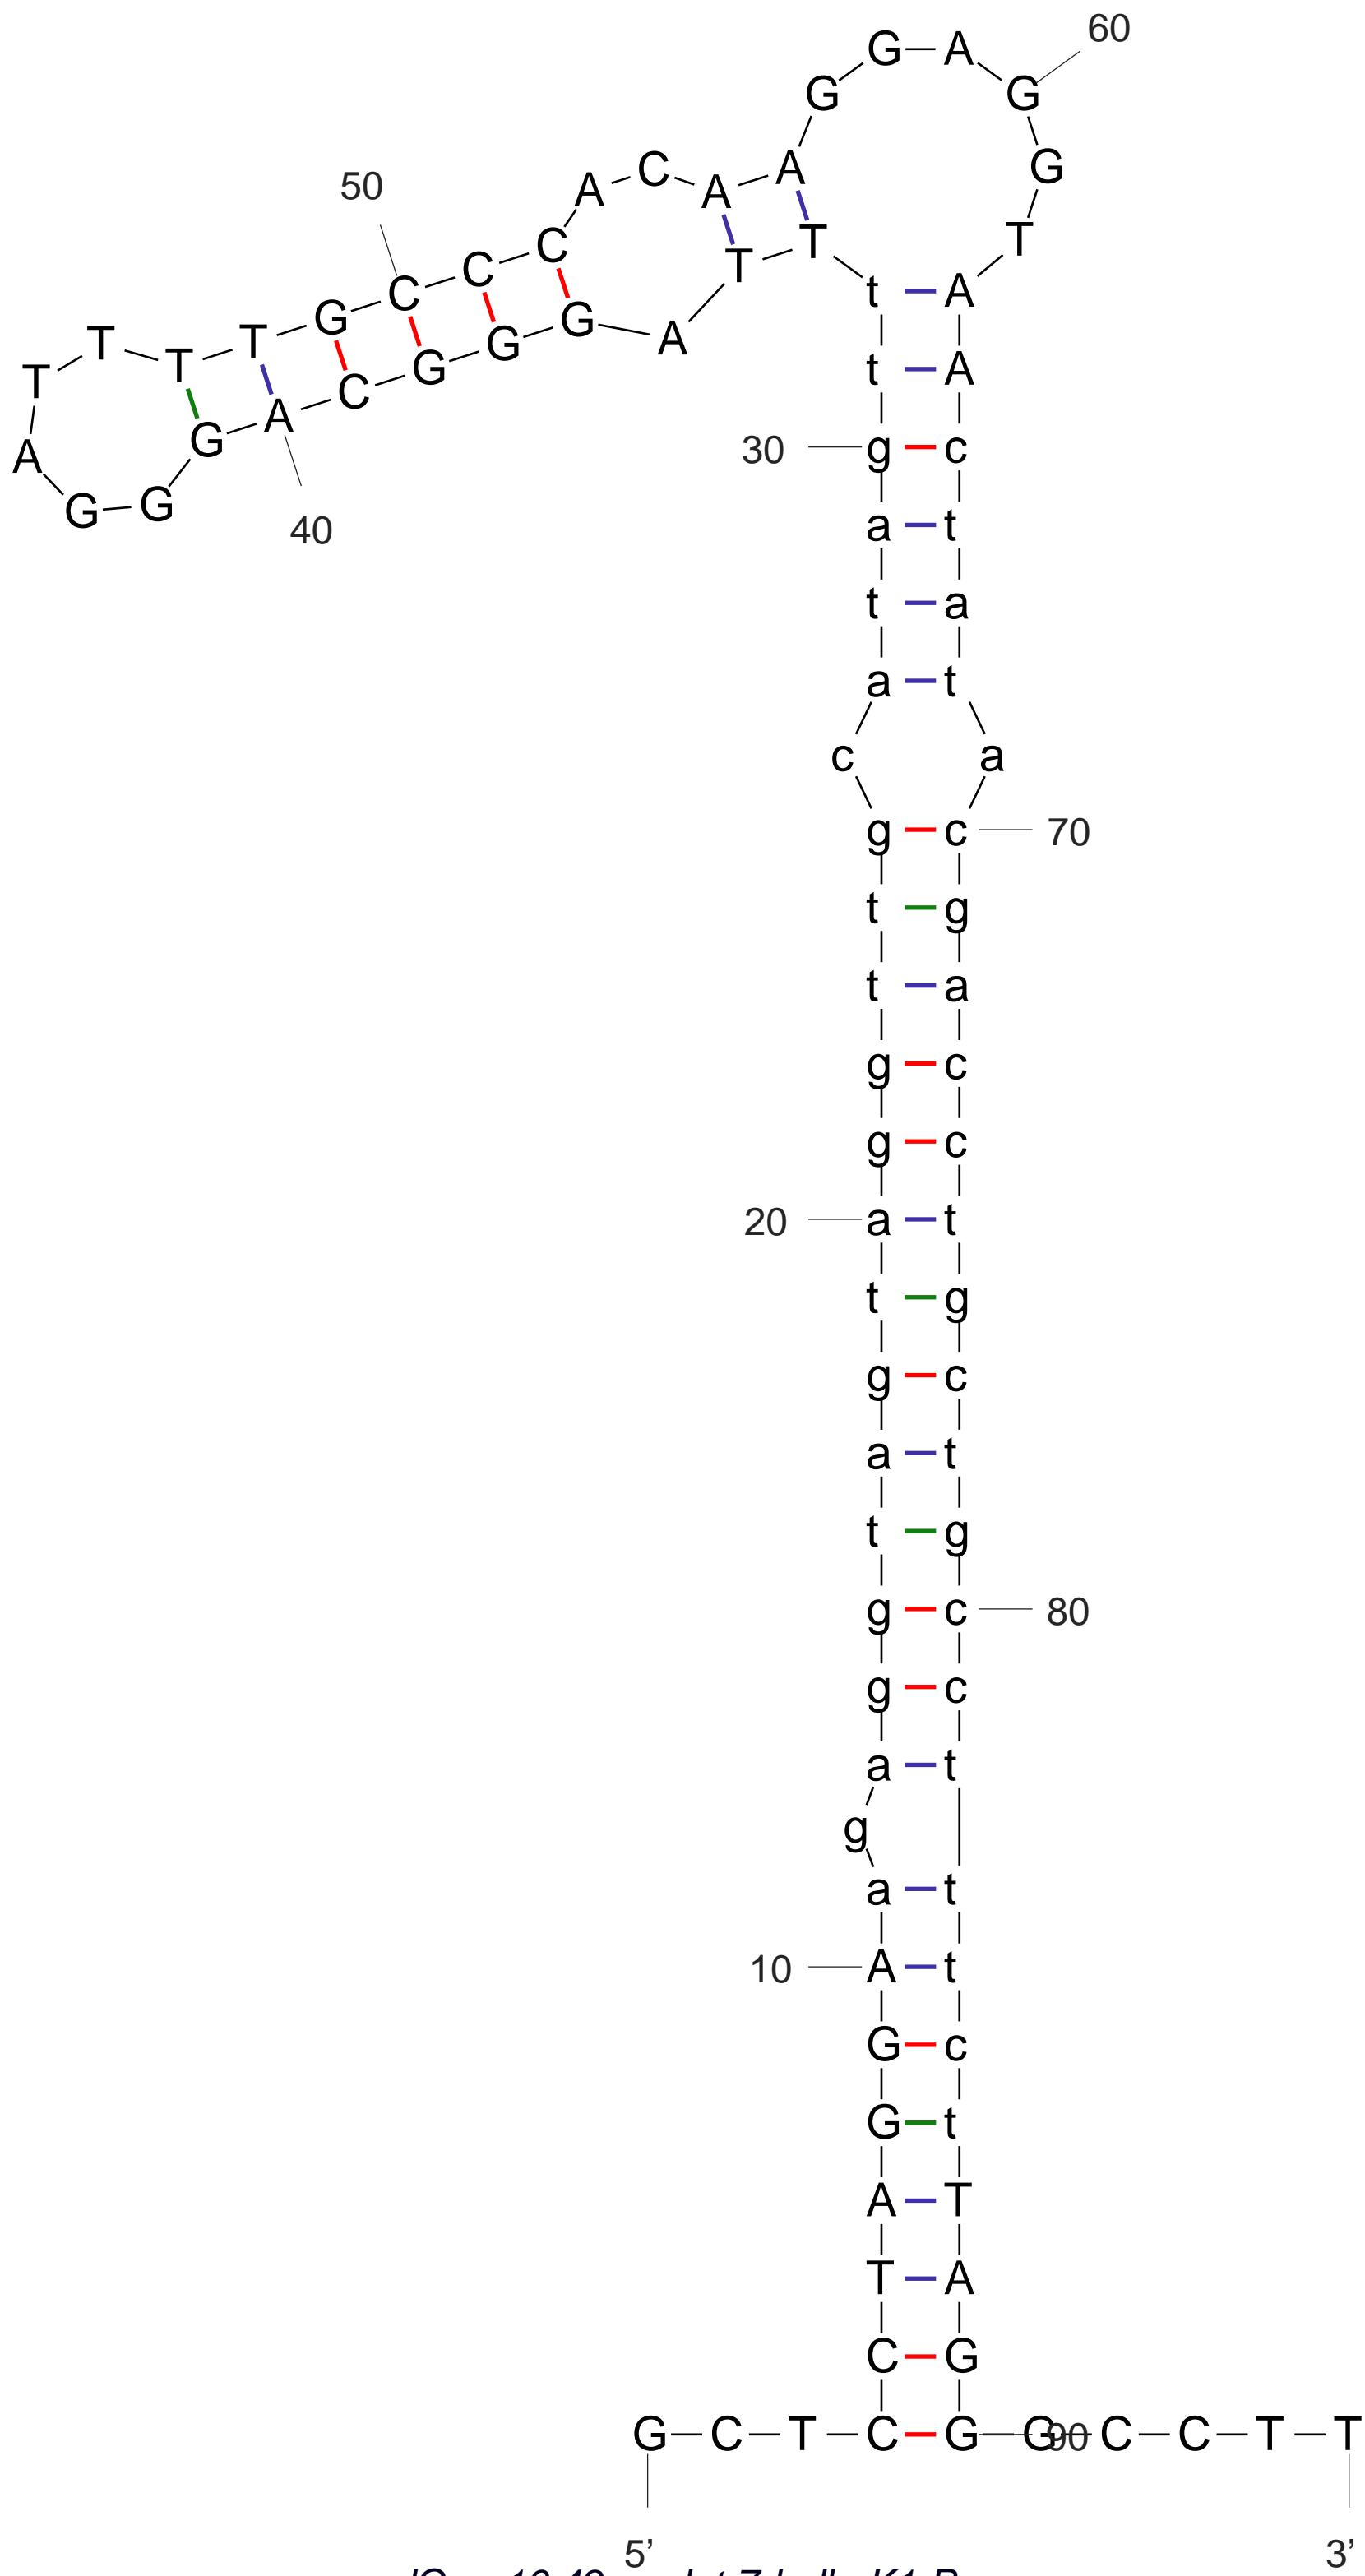

dG = -16.49 *cgr-let-7d\_db\_K1-P*

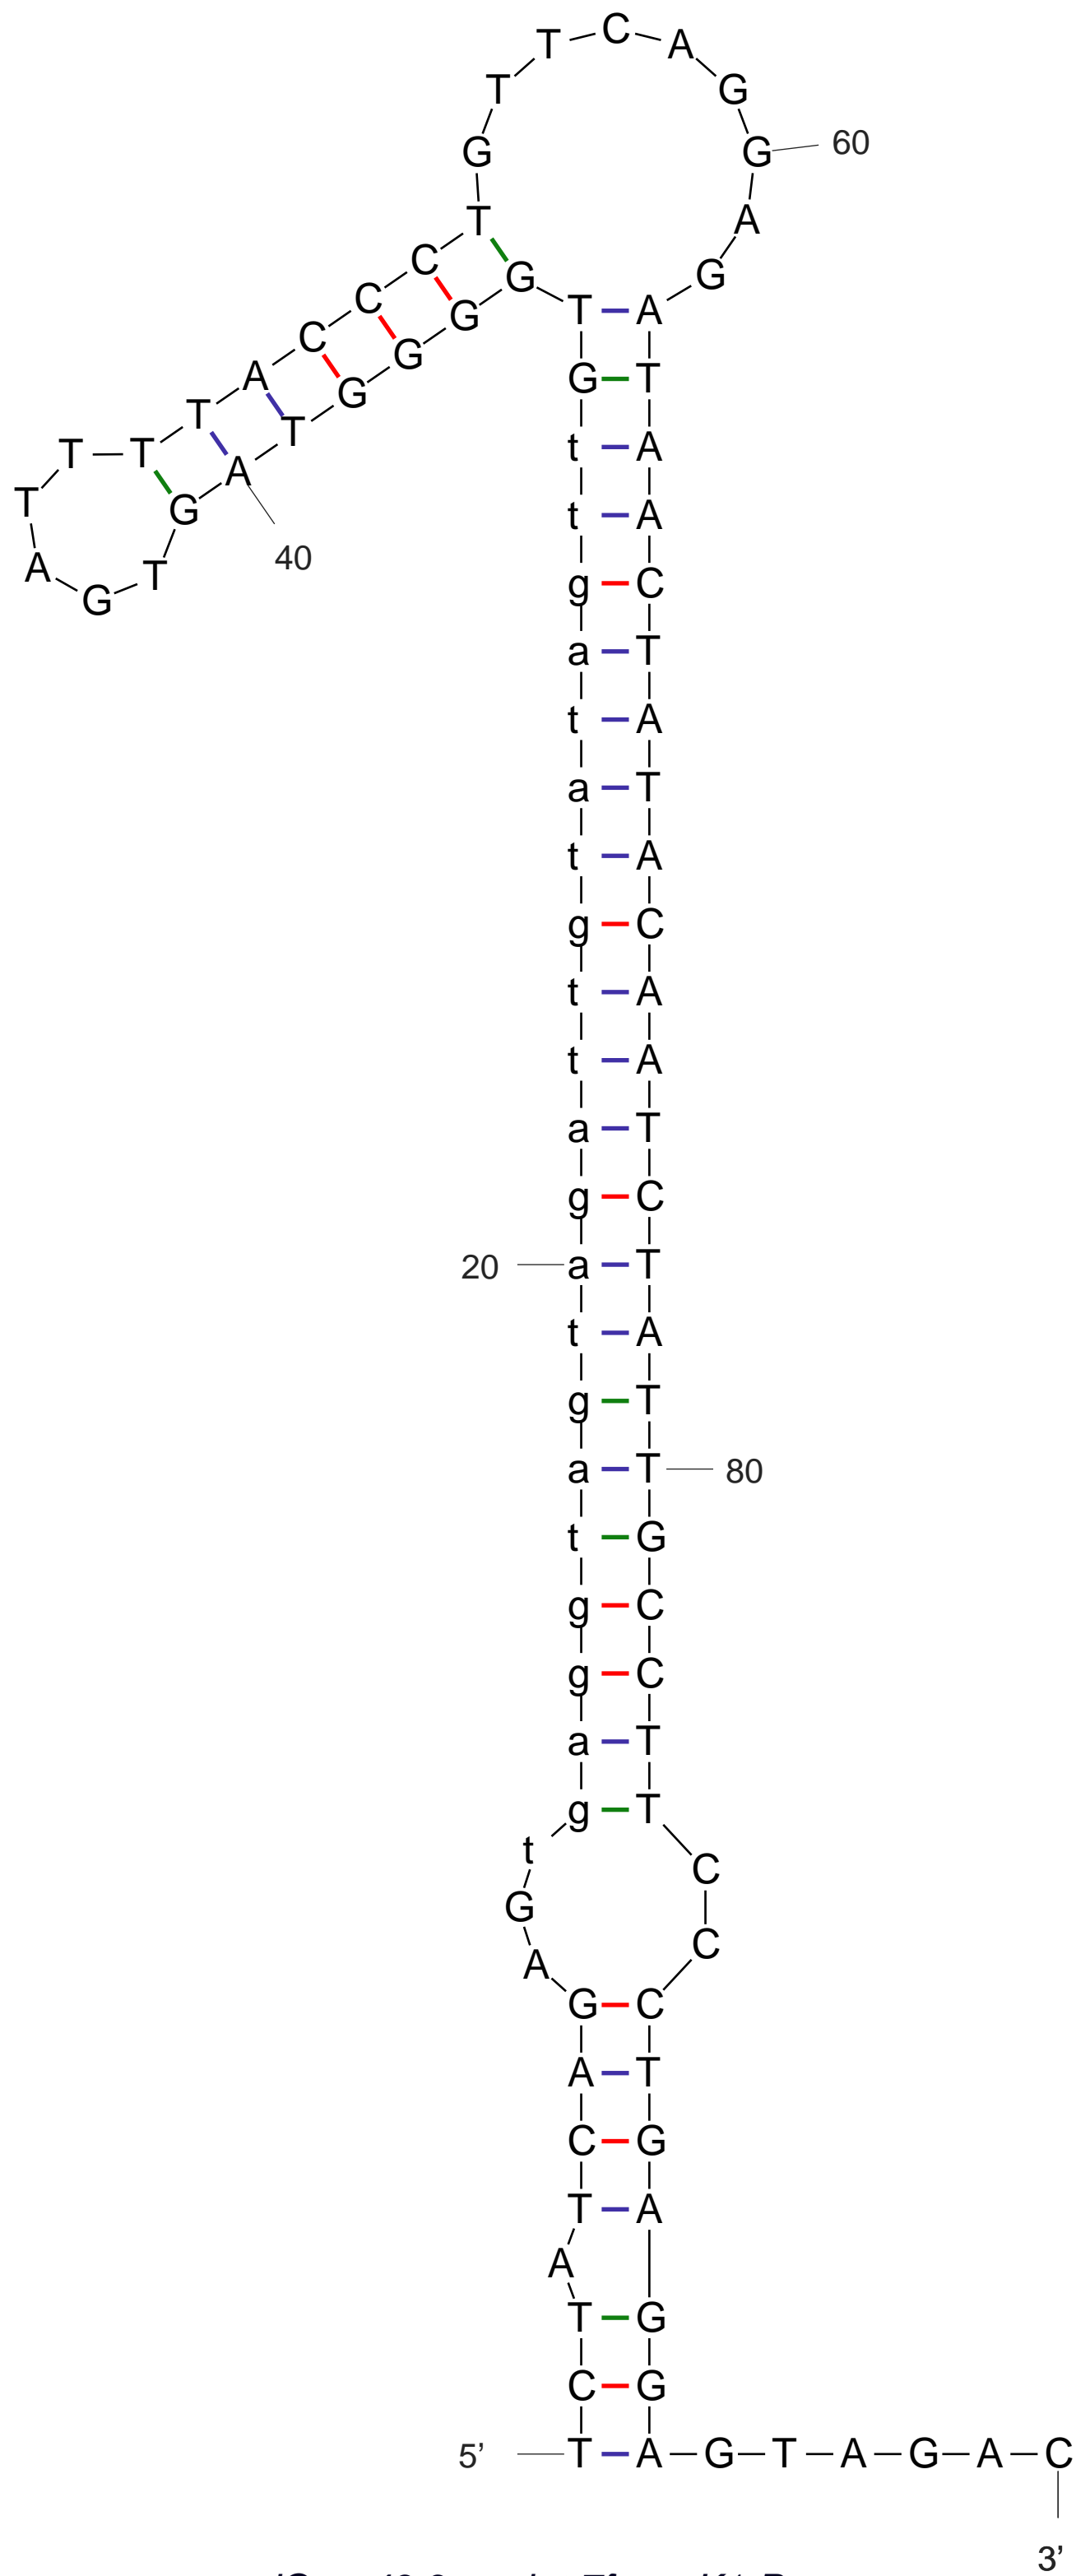

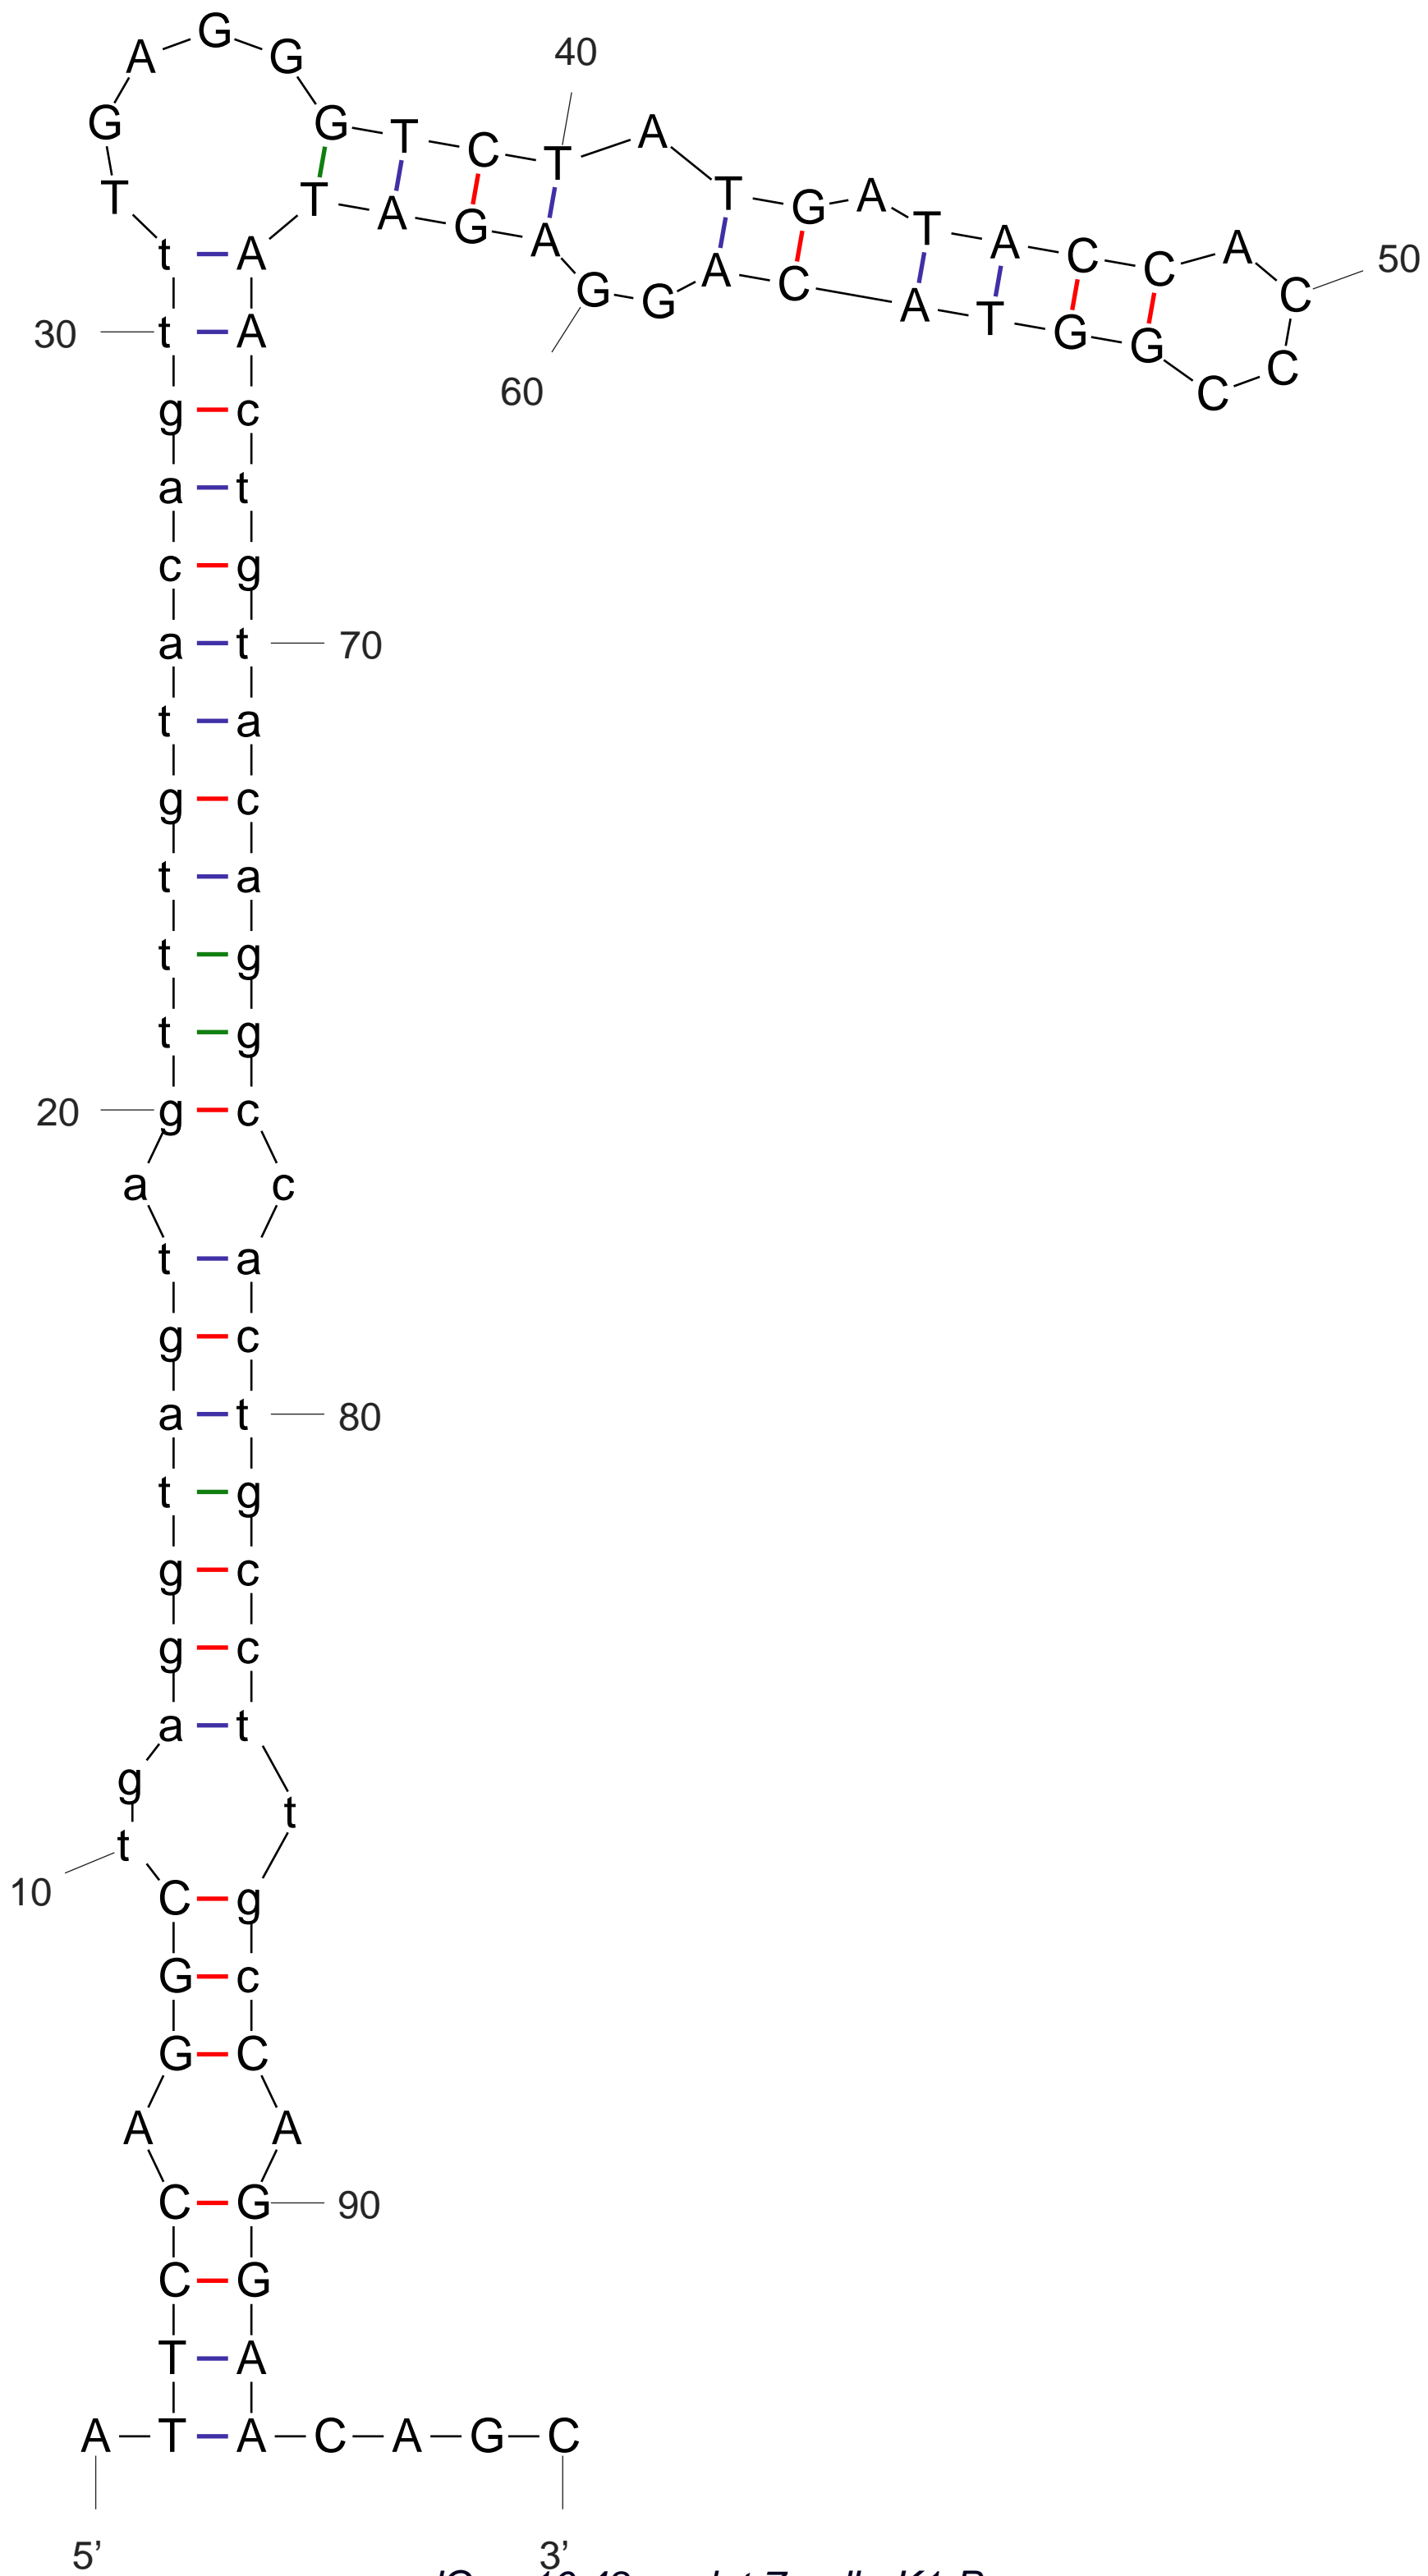

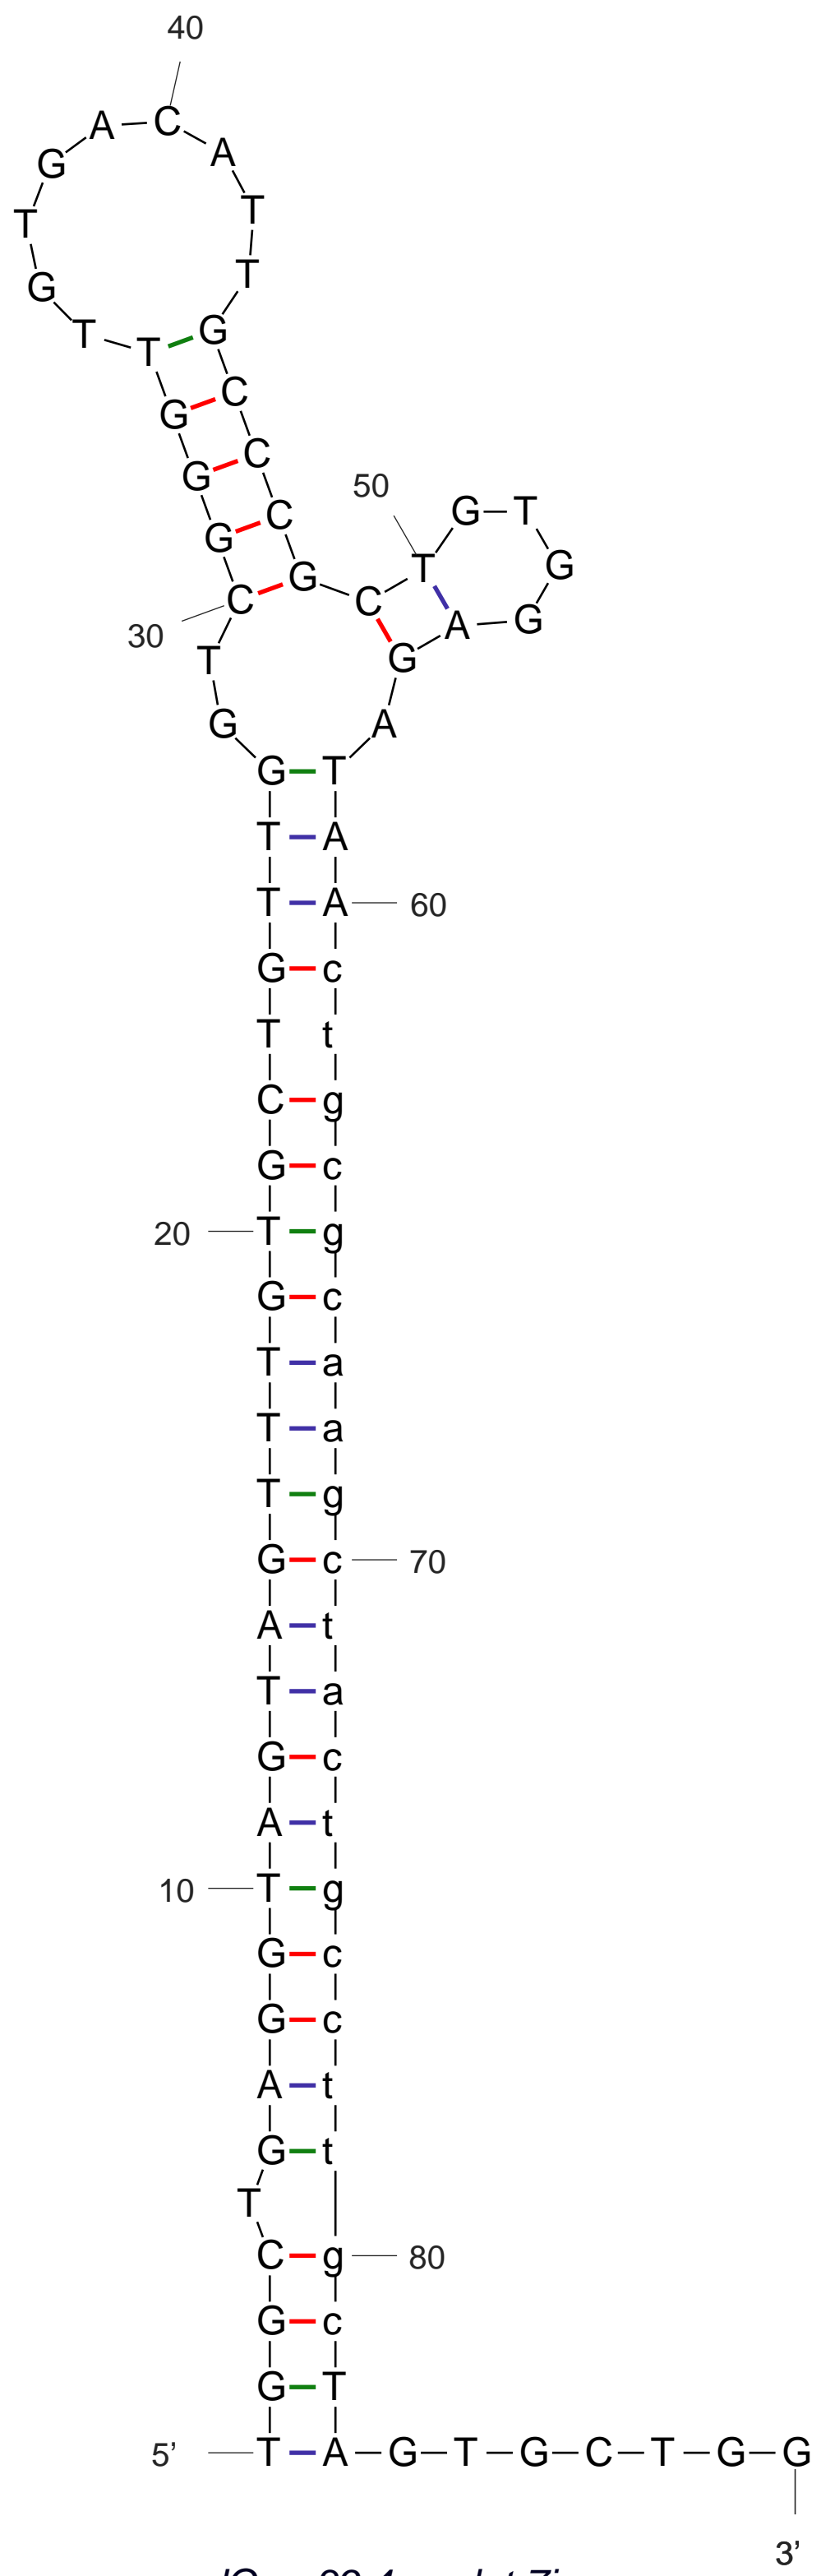





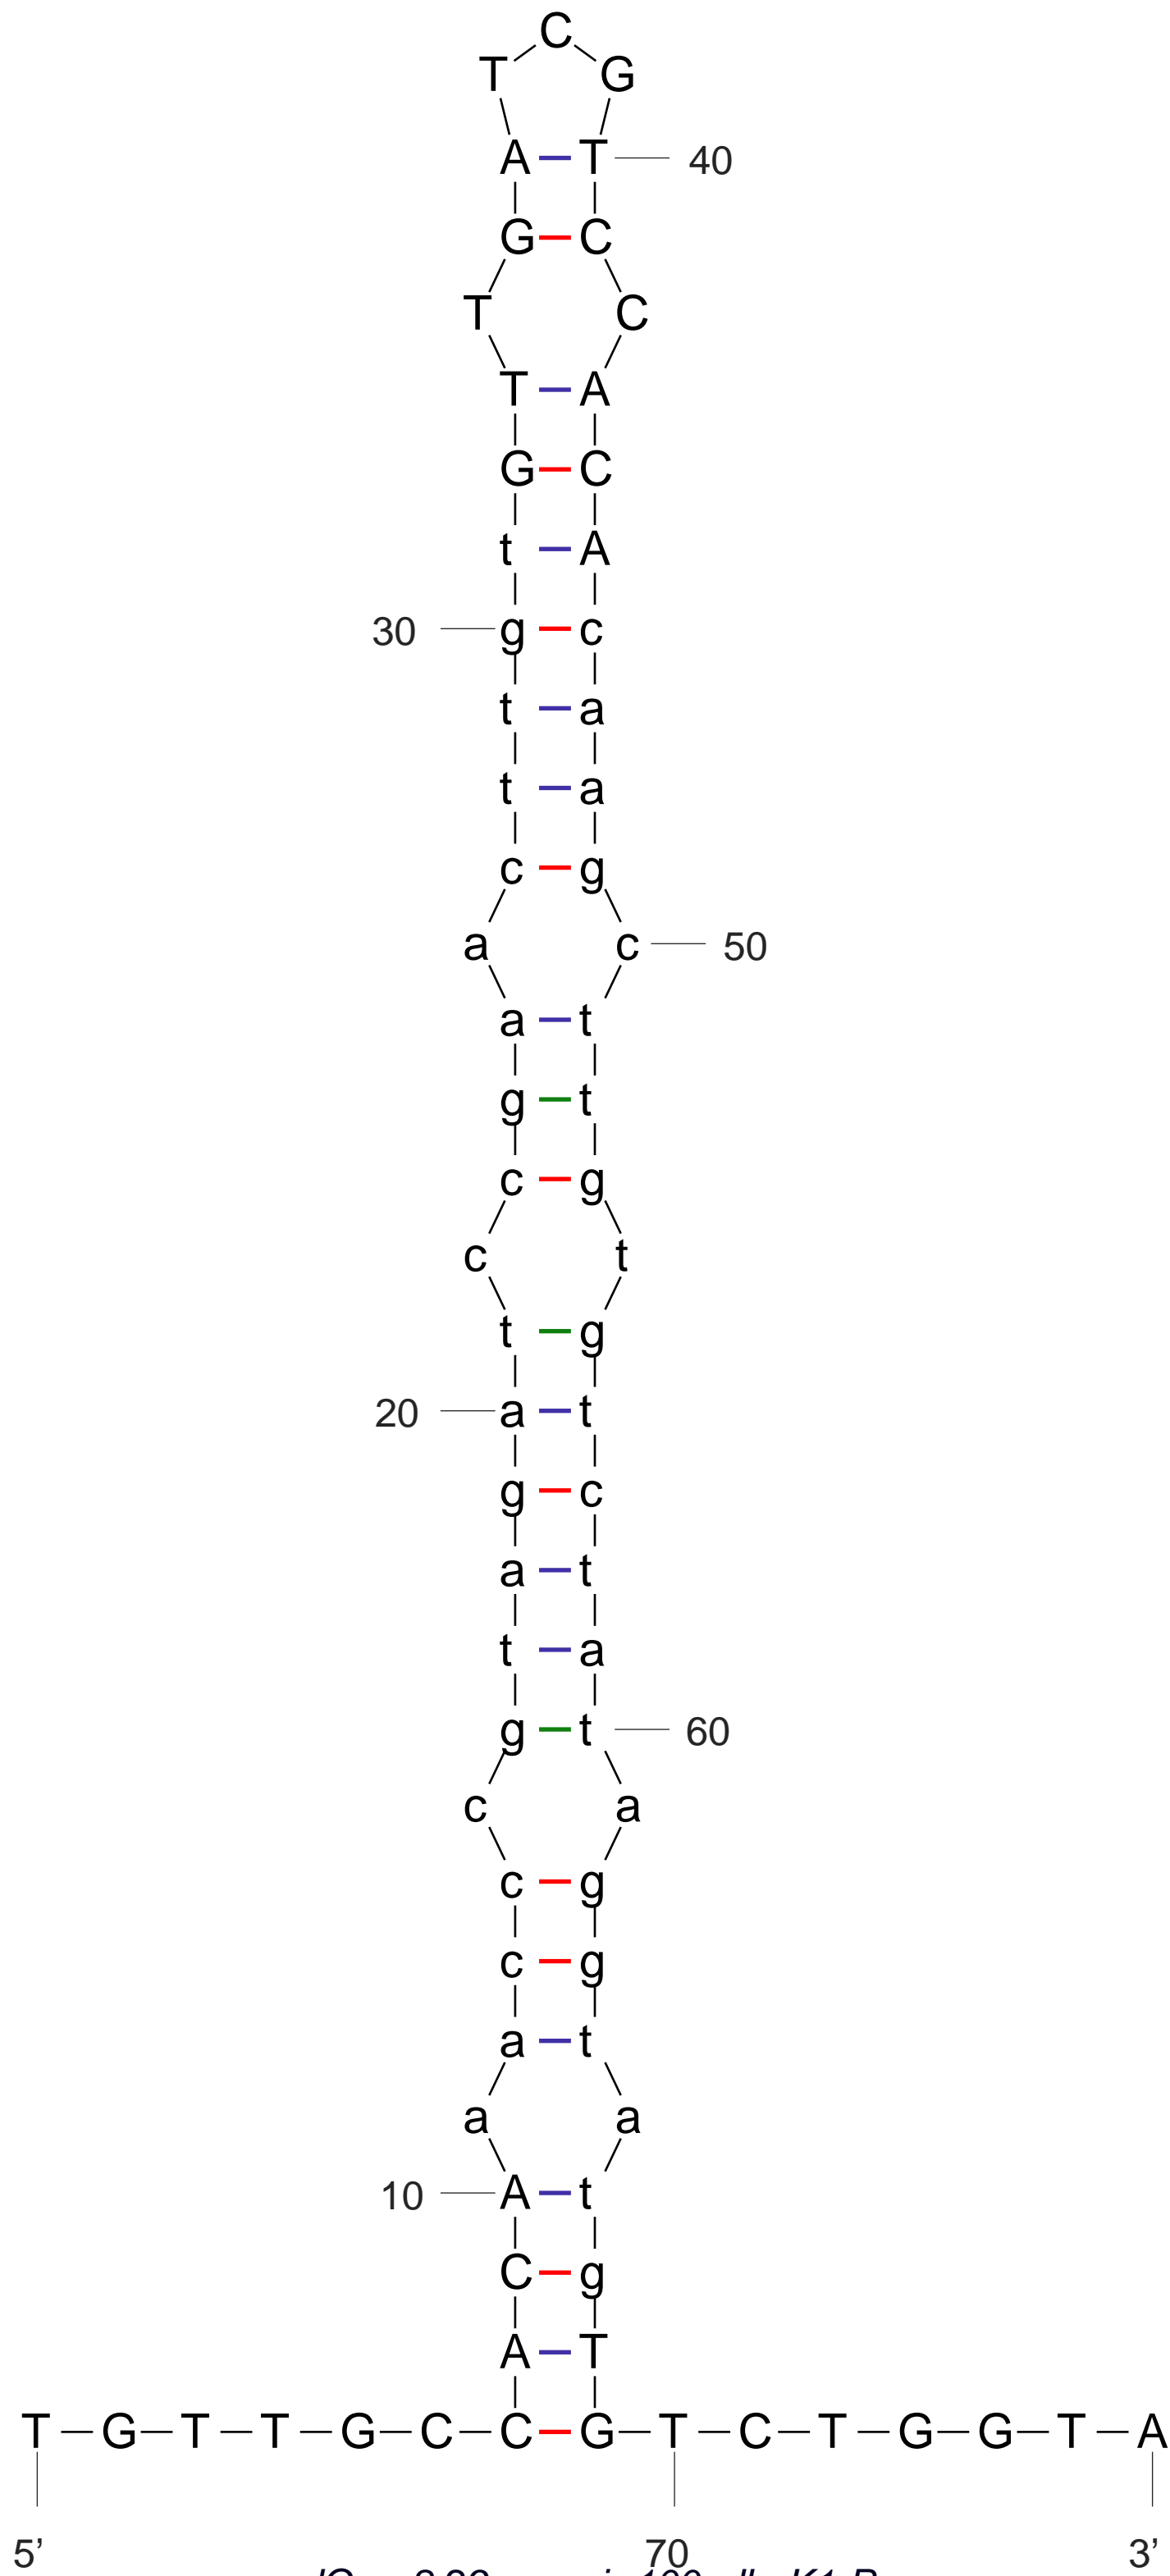

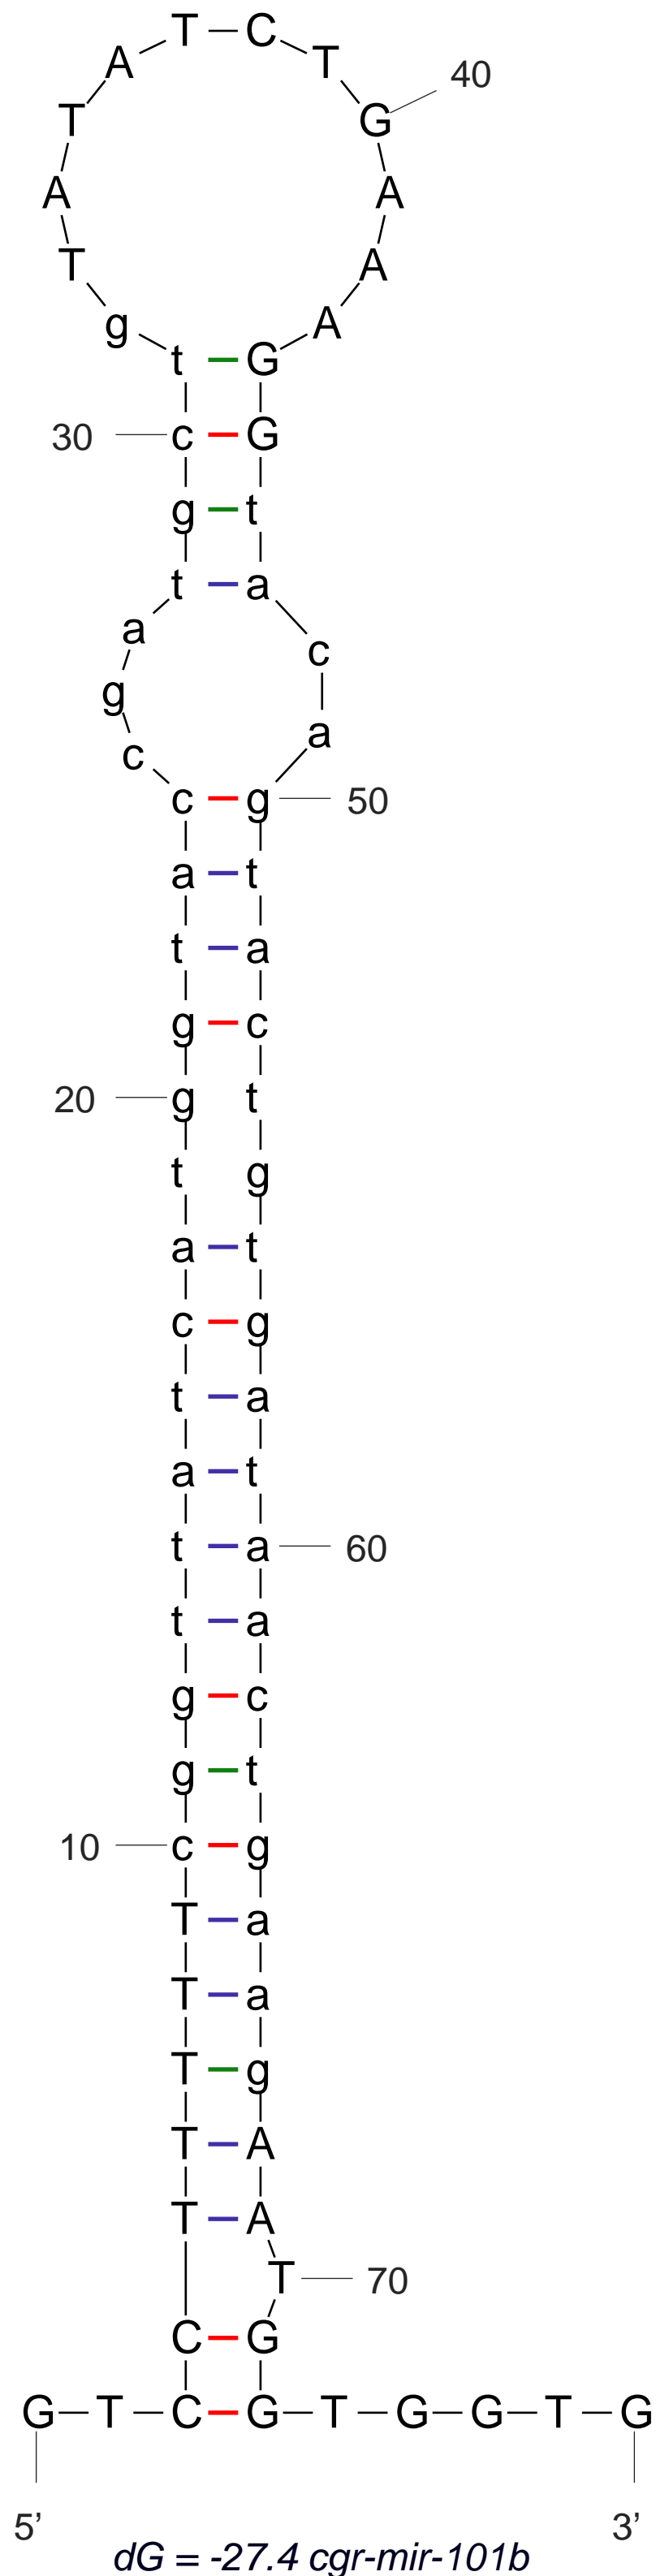

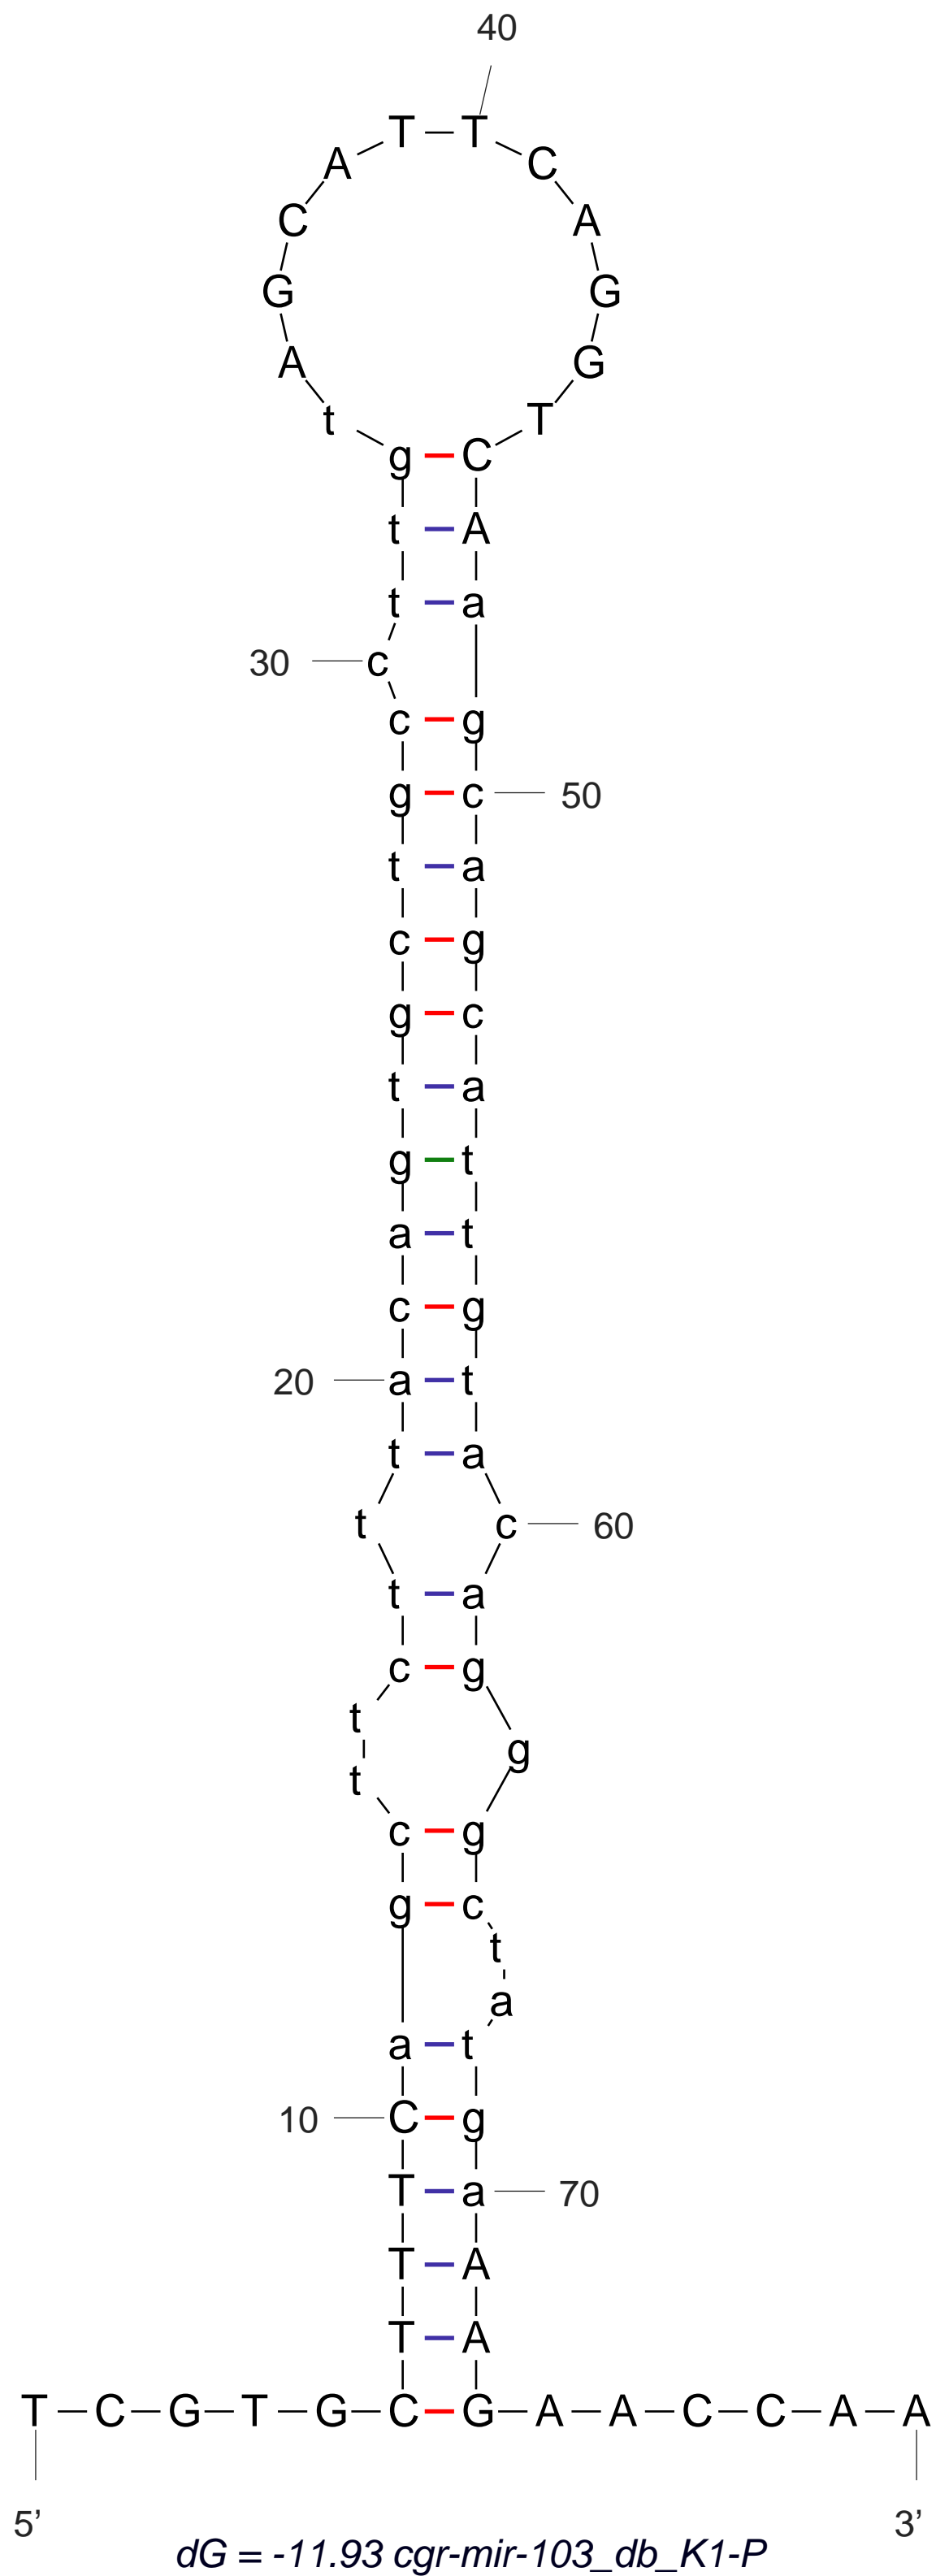

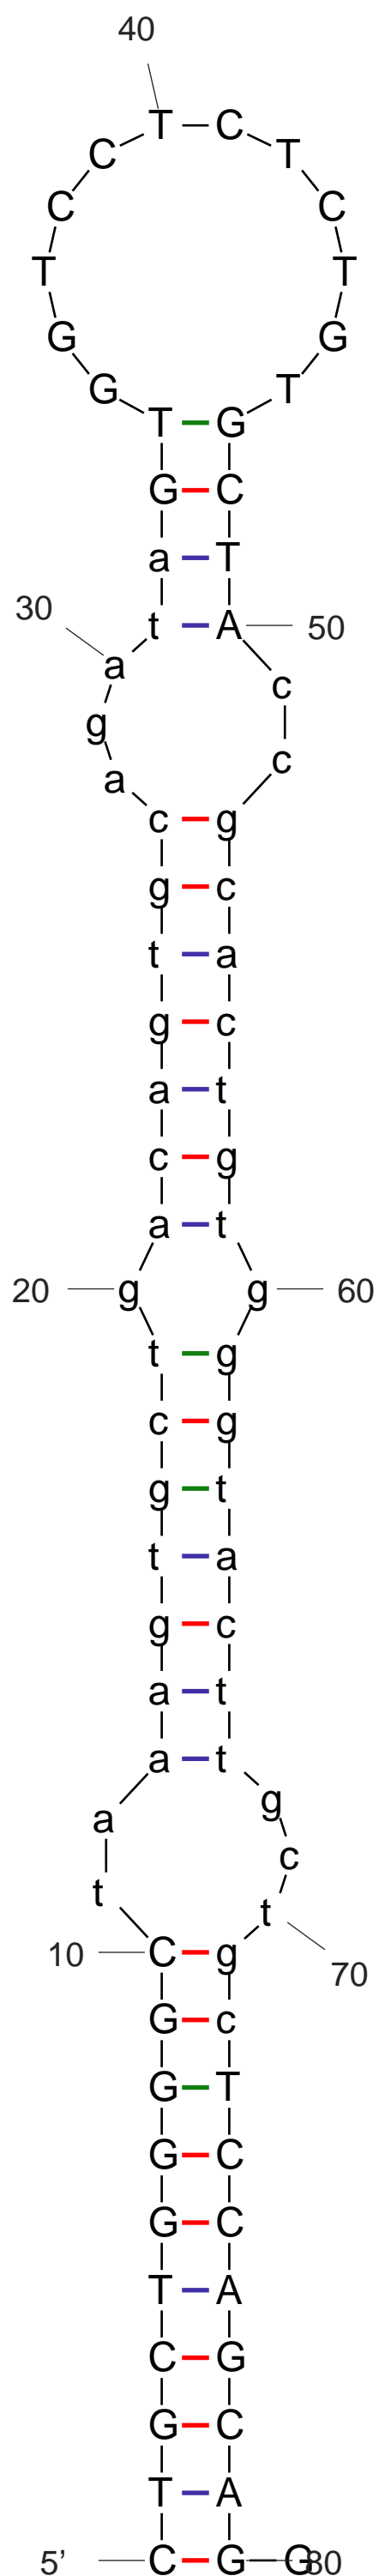

dG = -17.38 *cgr-mir-106b\_db\_K1-P*

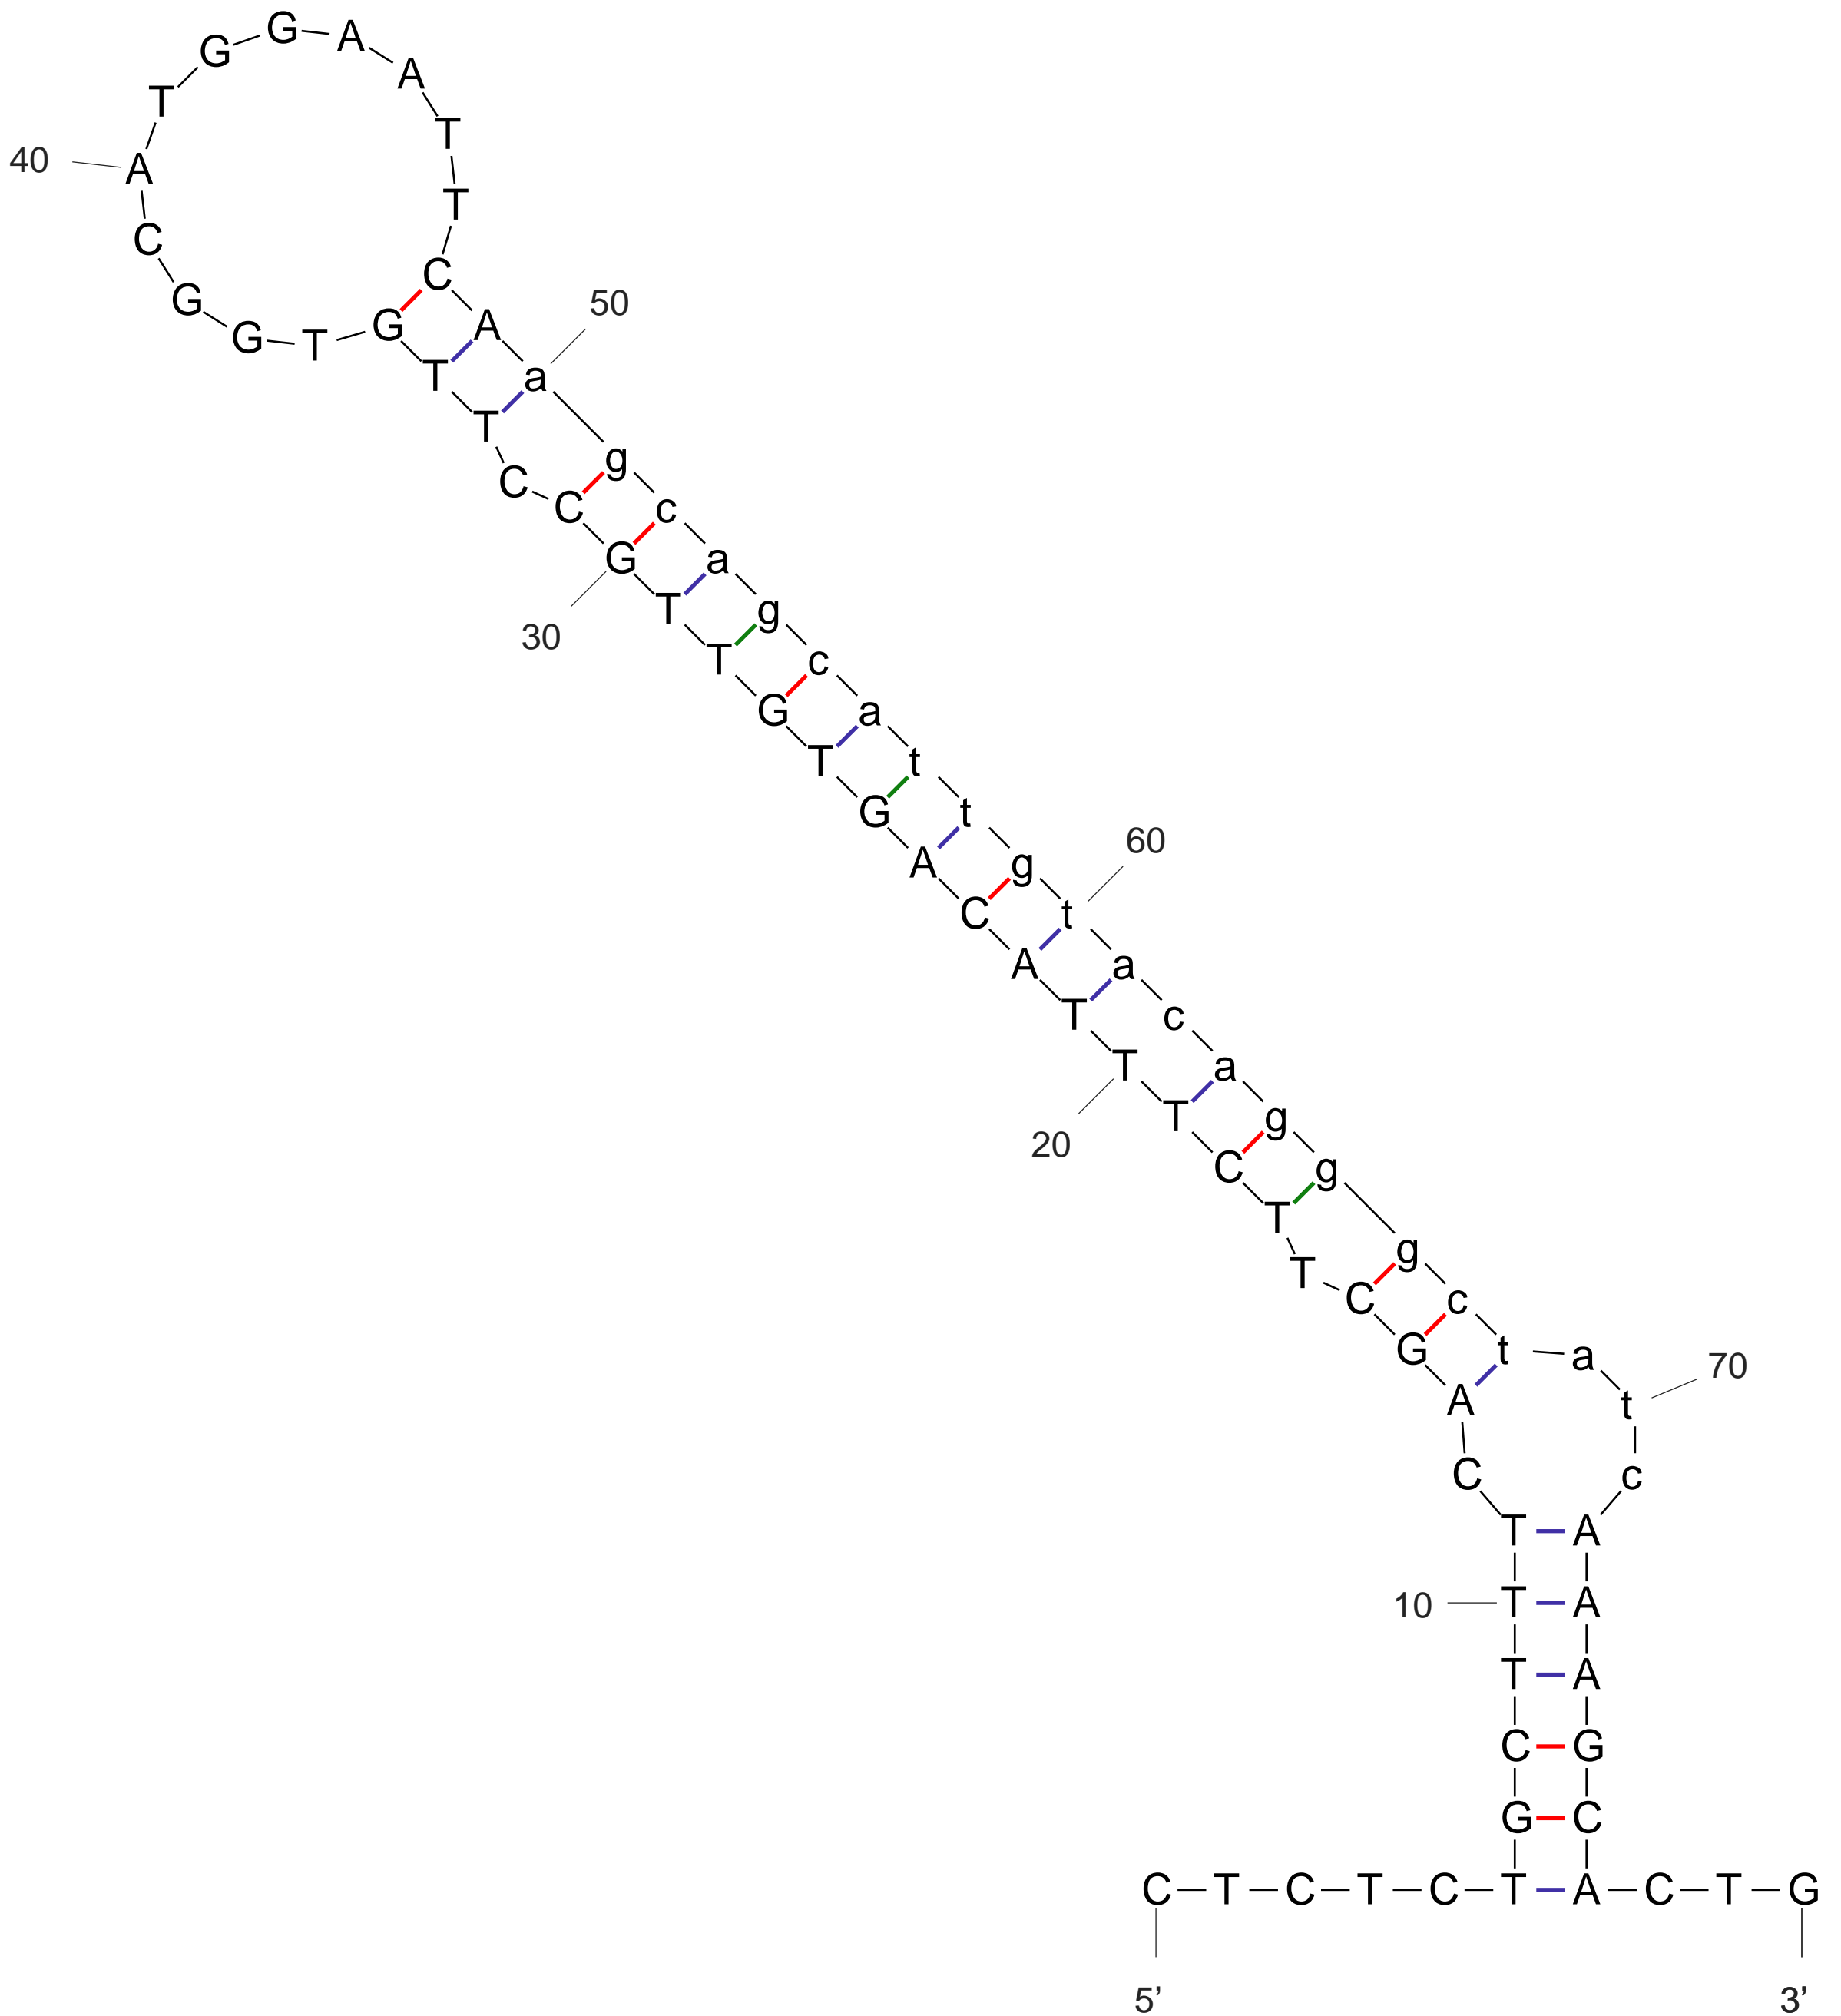

dG = -25.6 cgr-mir-107\_ss\_K1-P

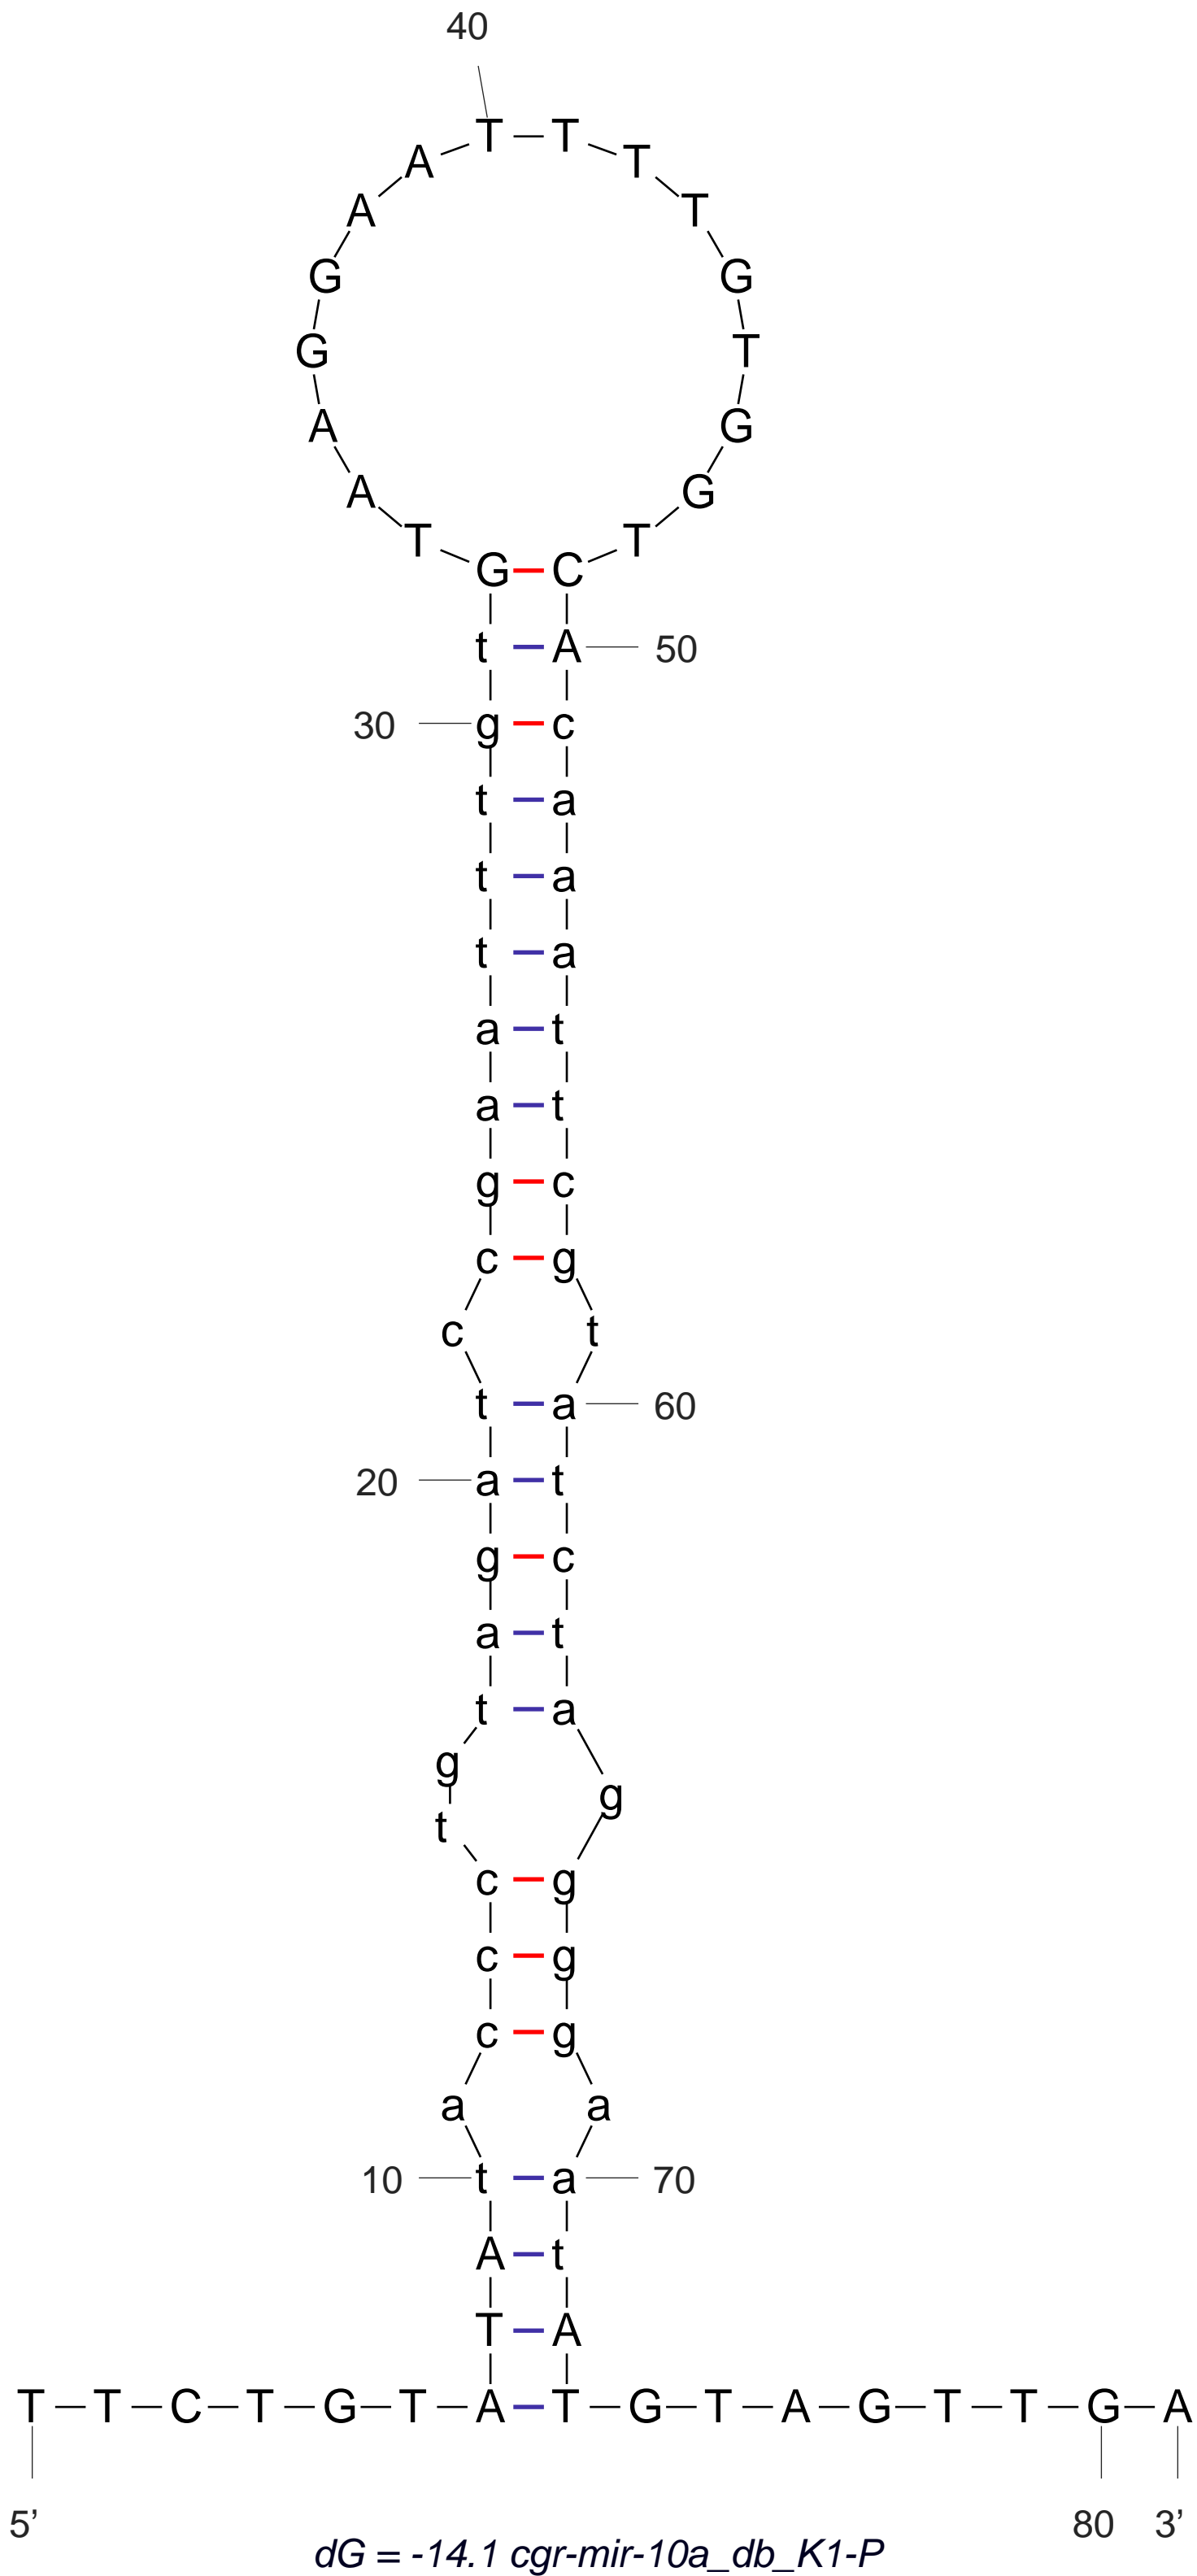

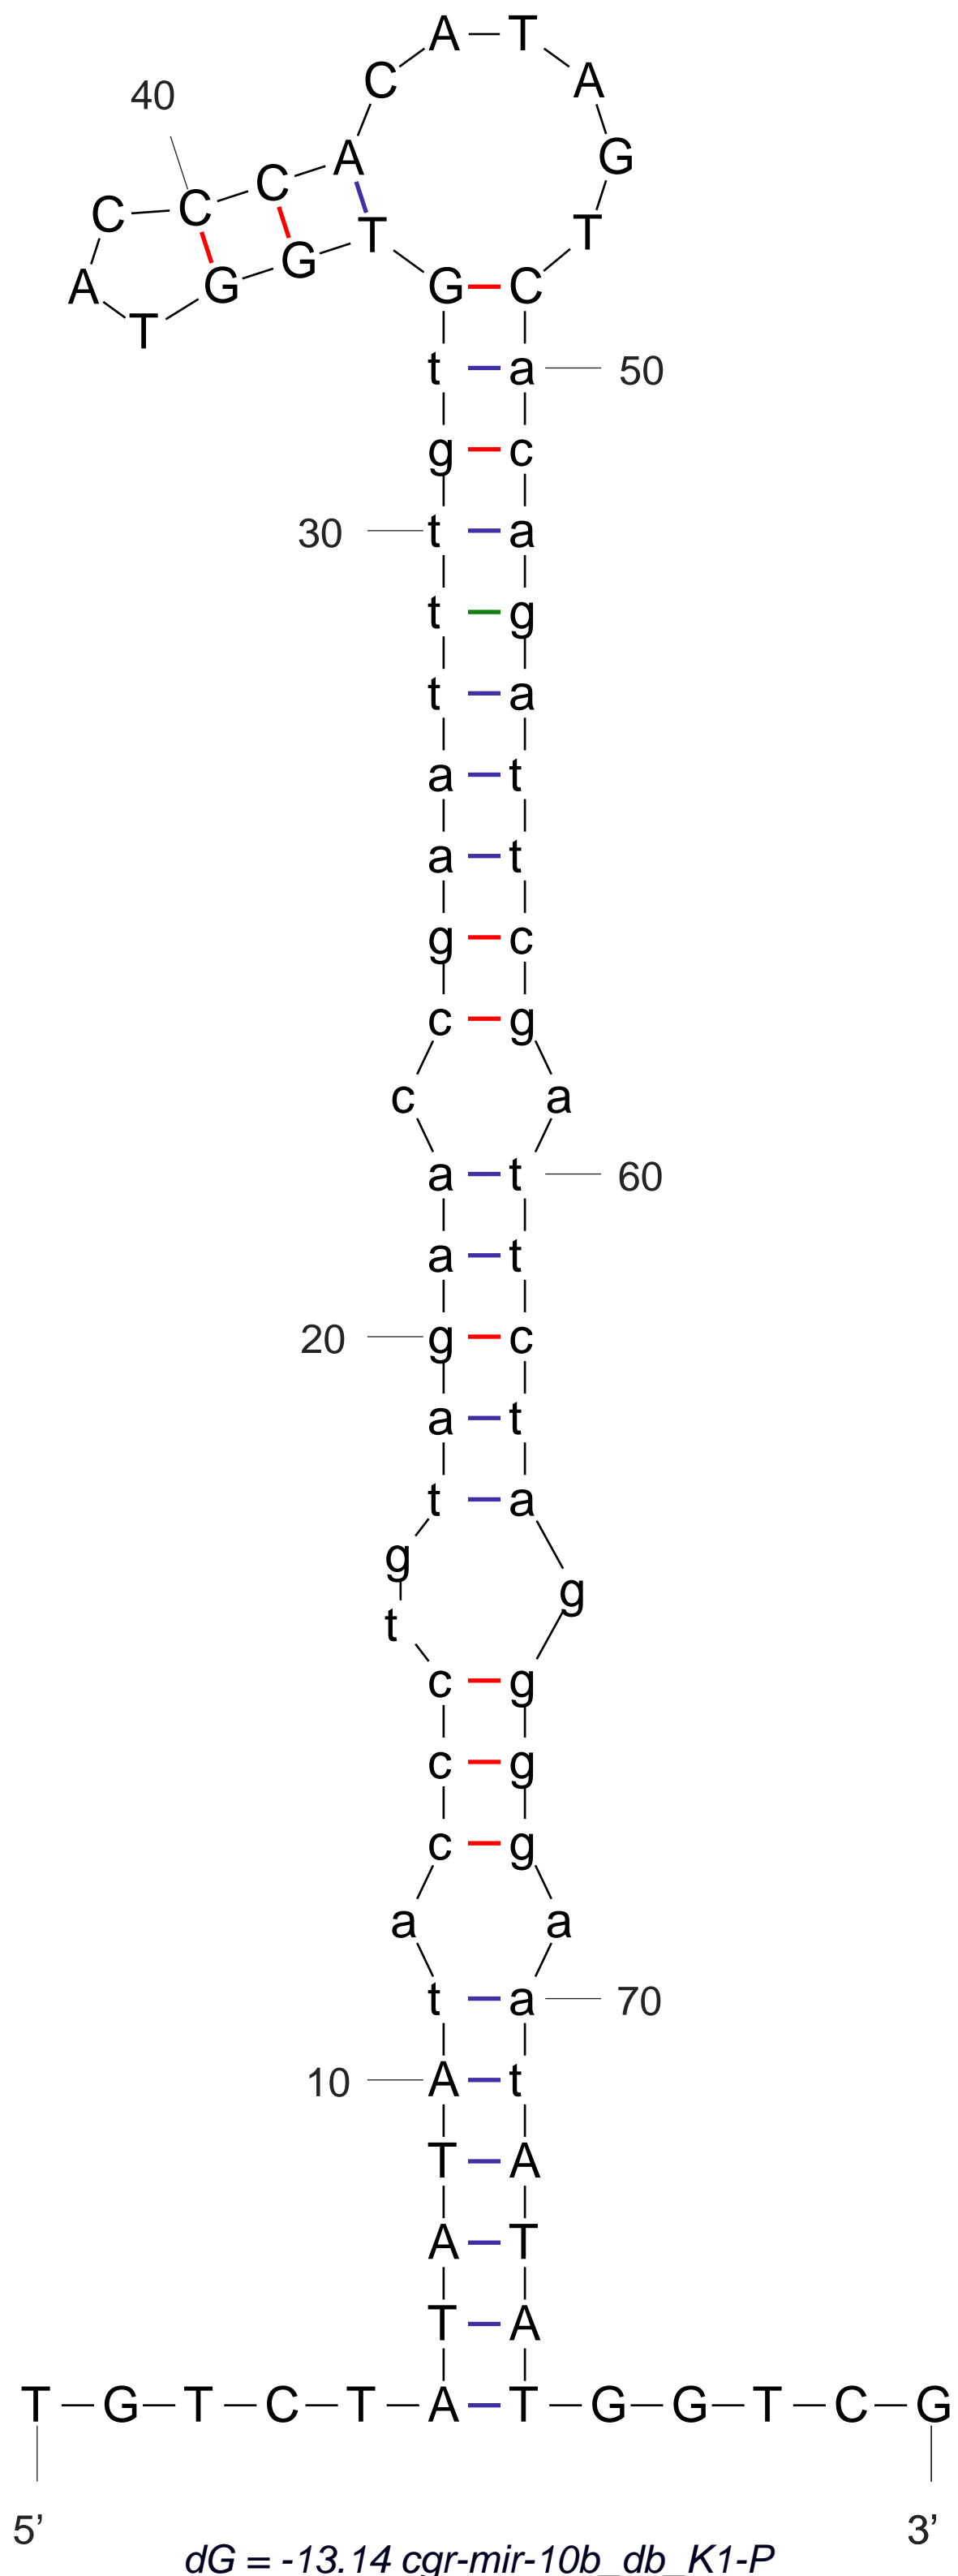

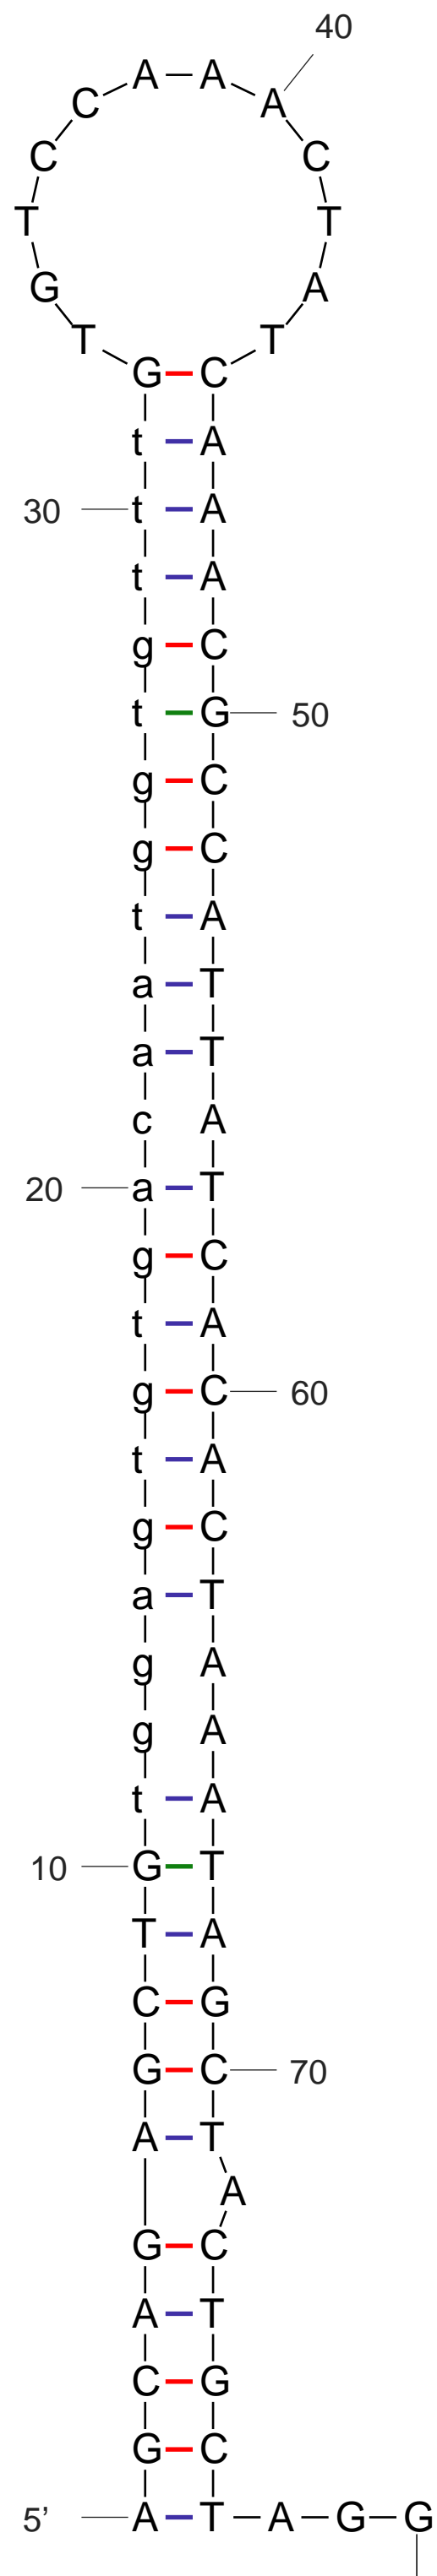



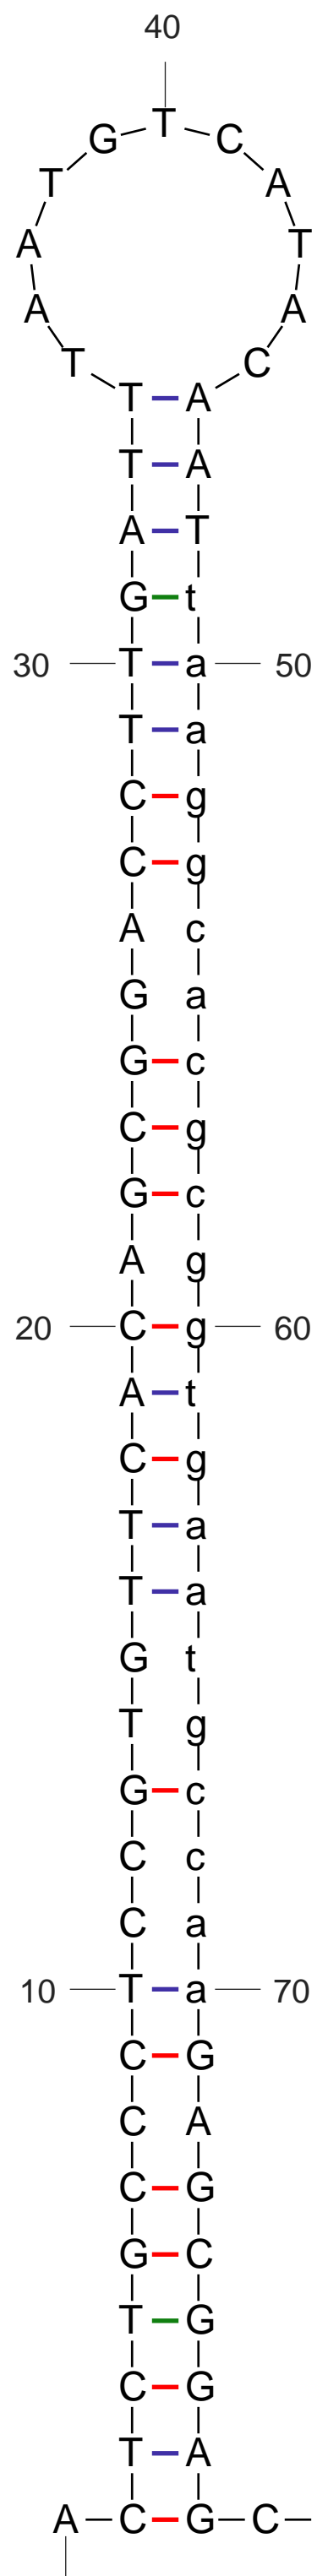

$dG = -33.9$  *cgr-mir-124*

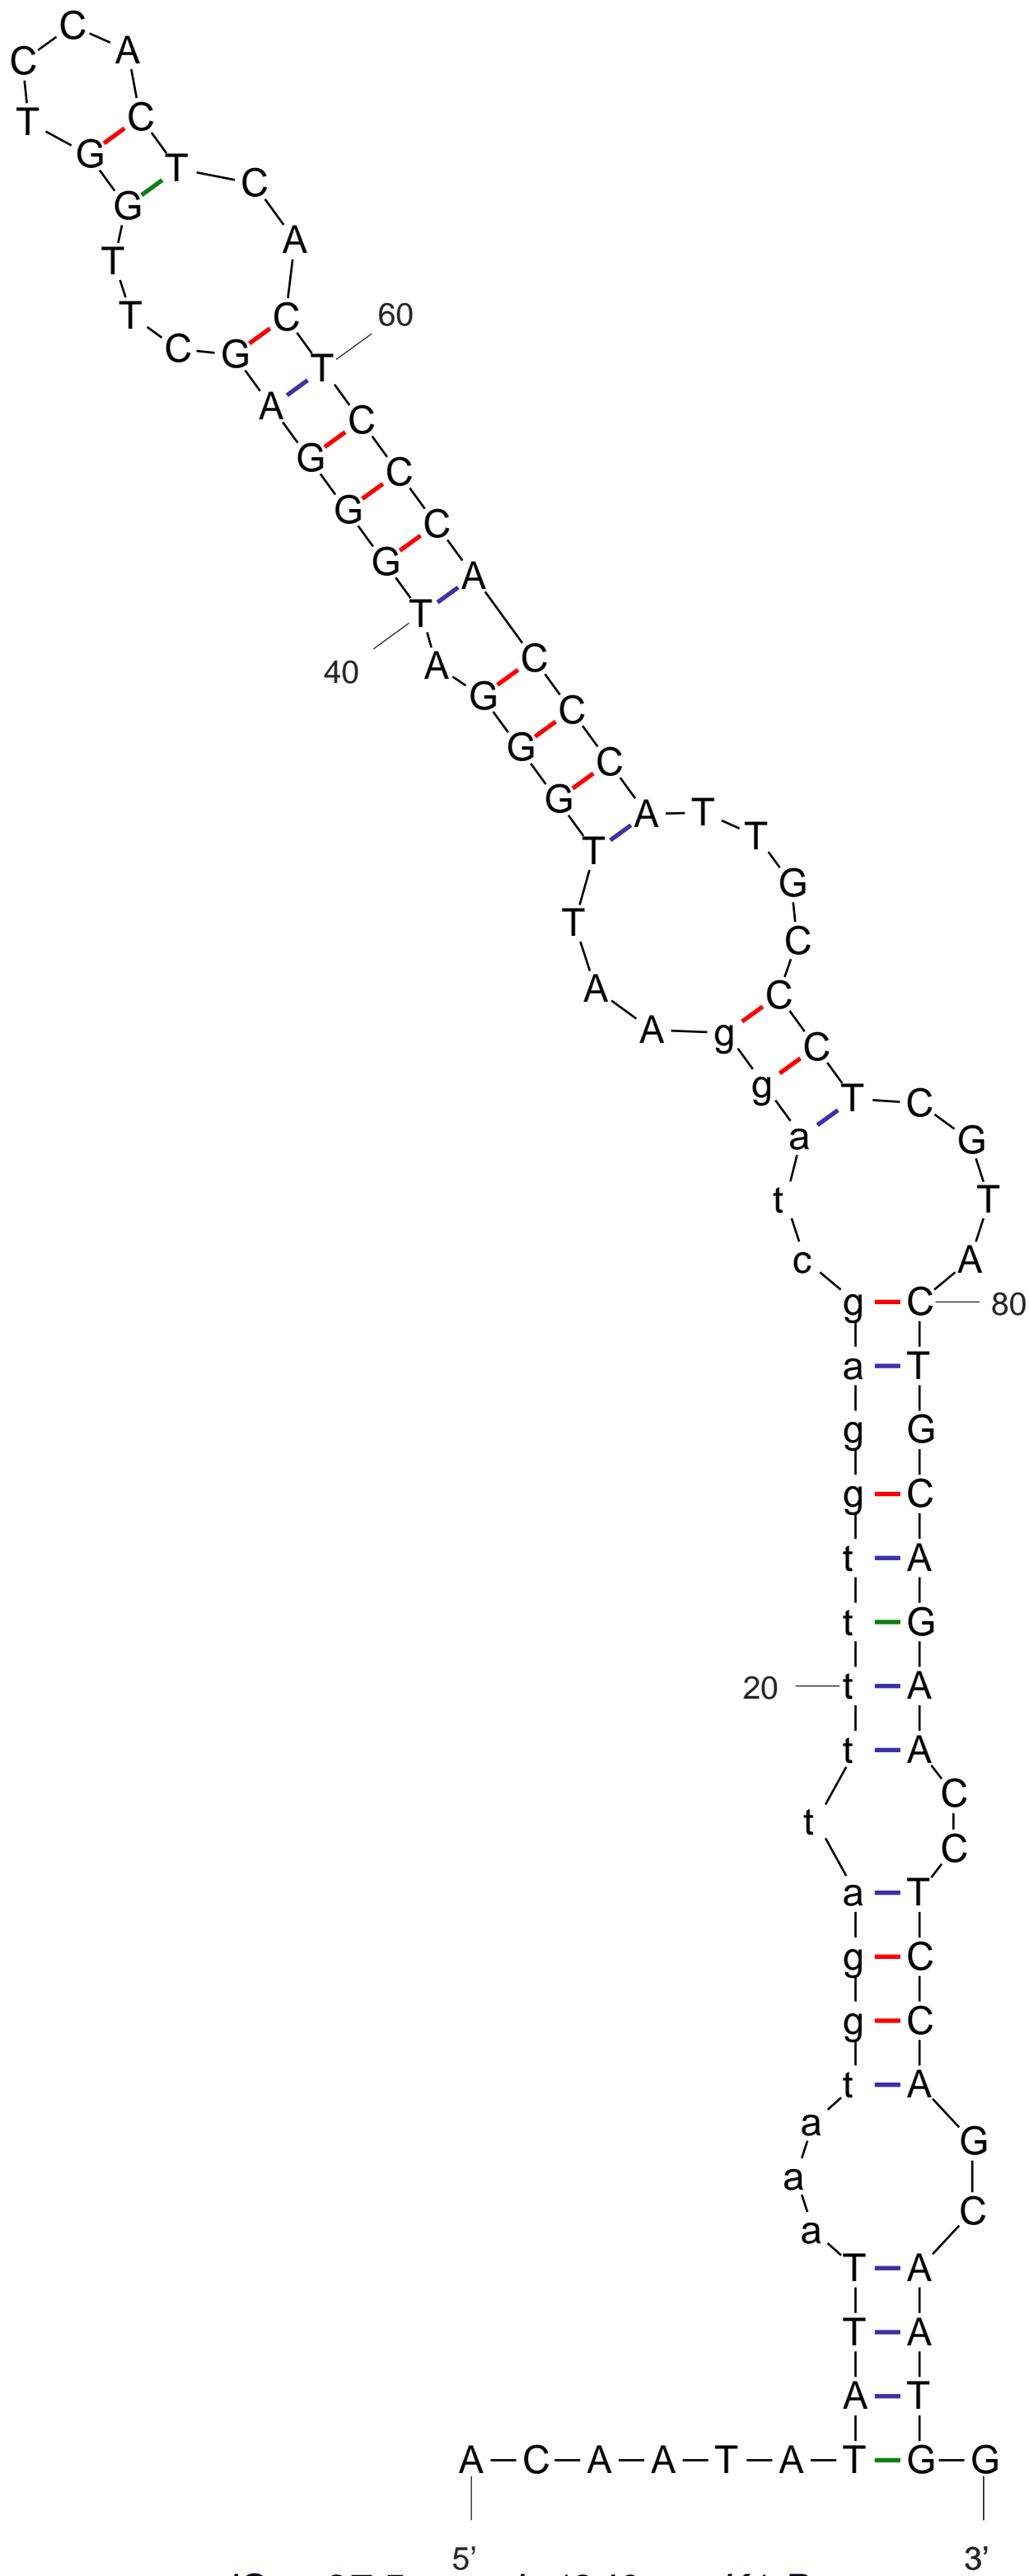

dG = -27.5 cgr-mir-1246\_ss\_K1-P



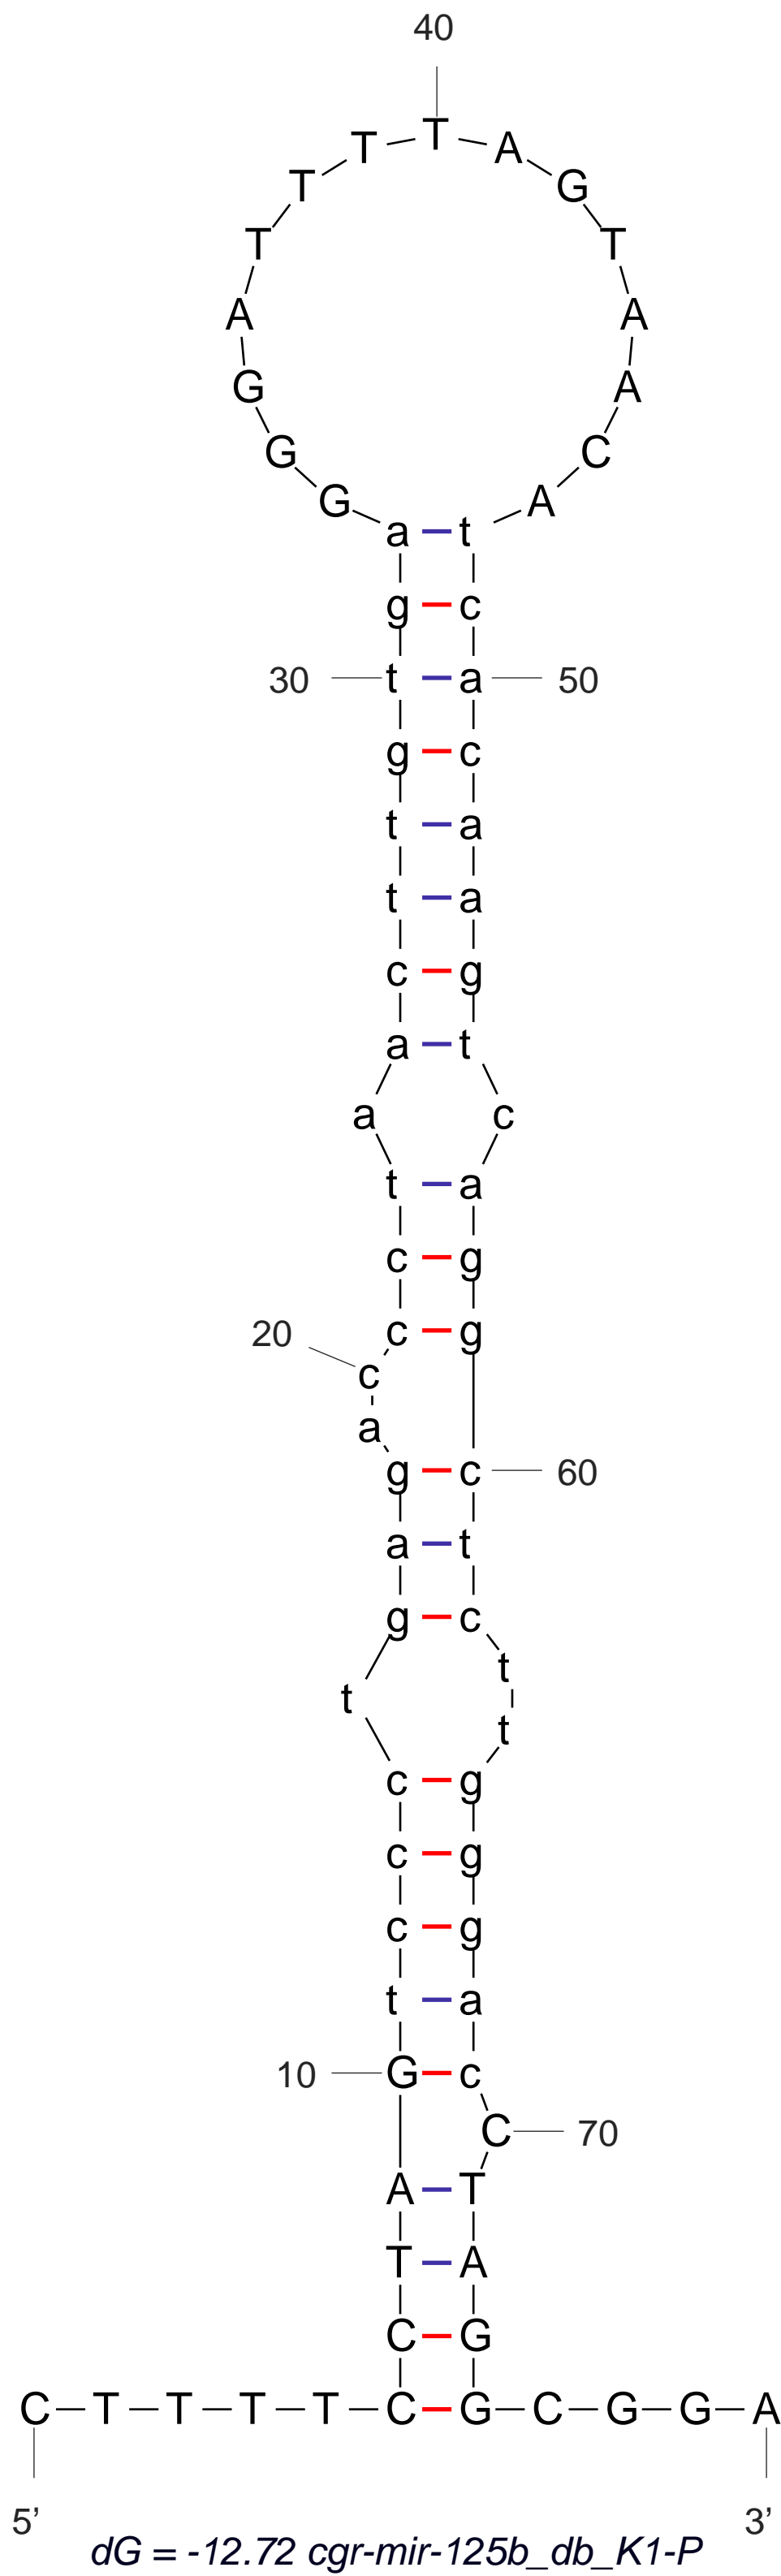

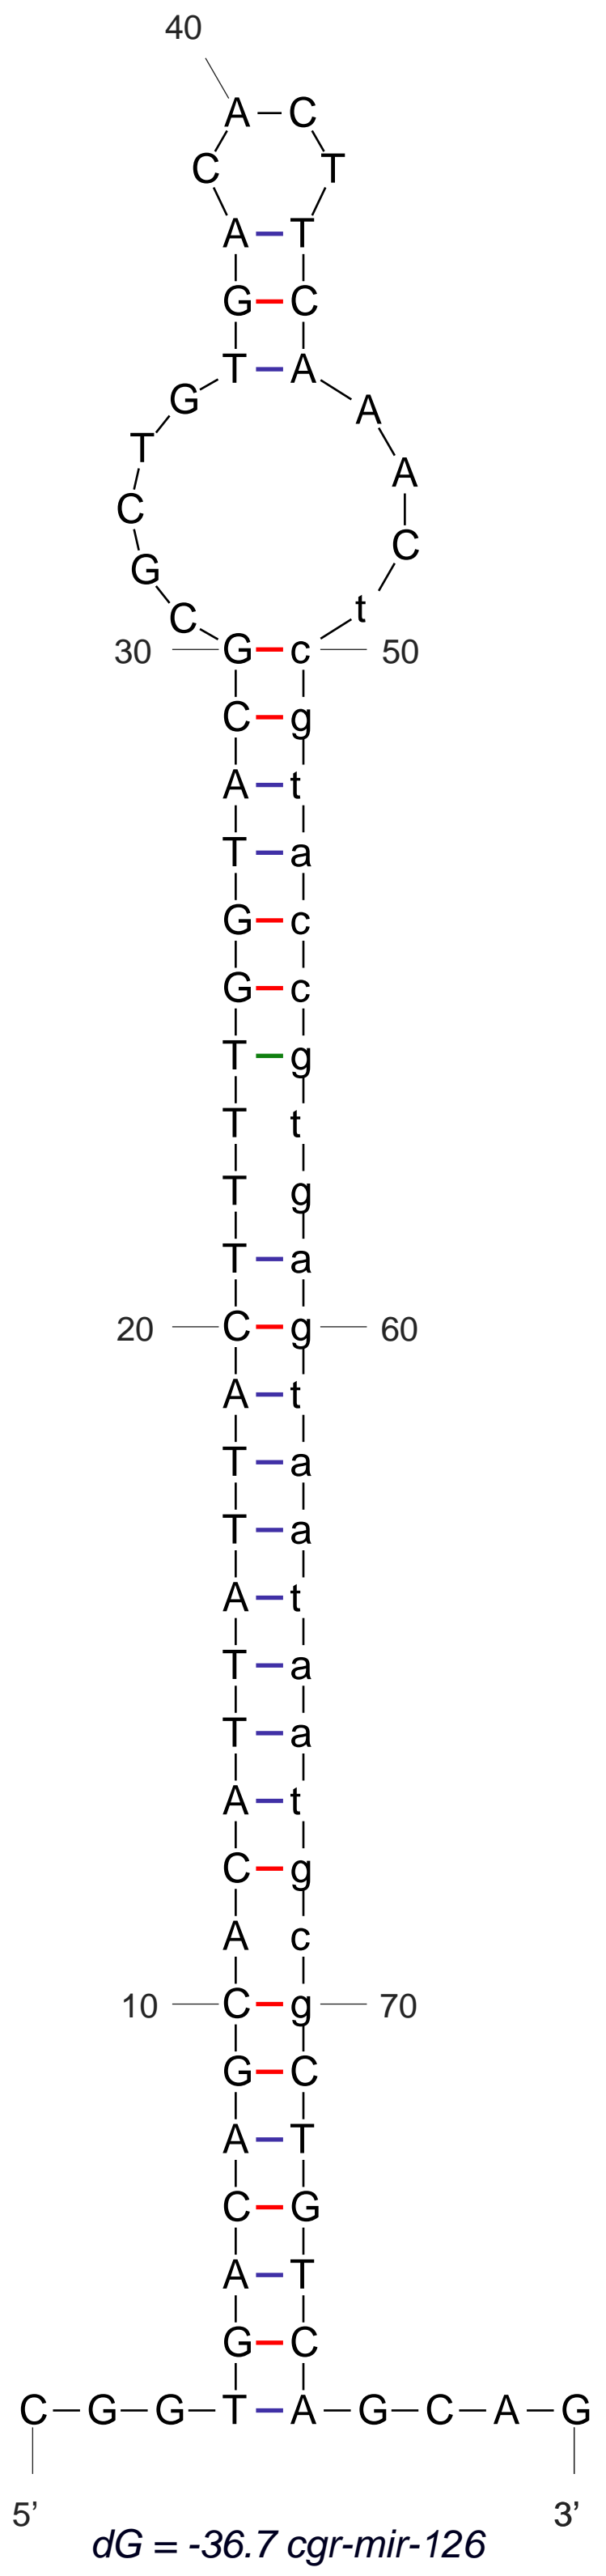

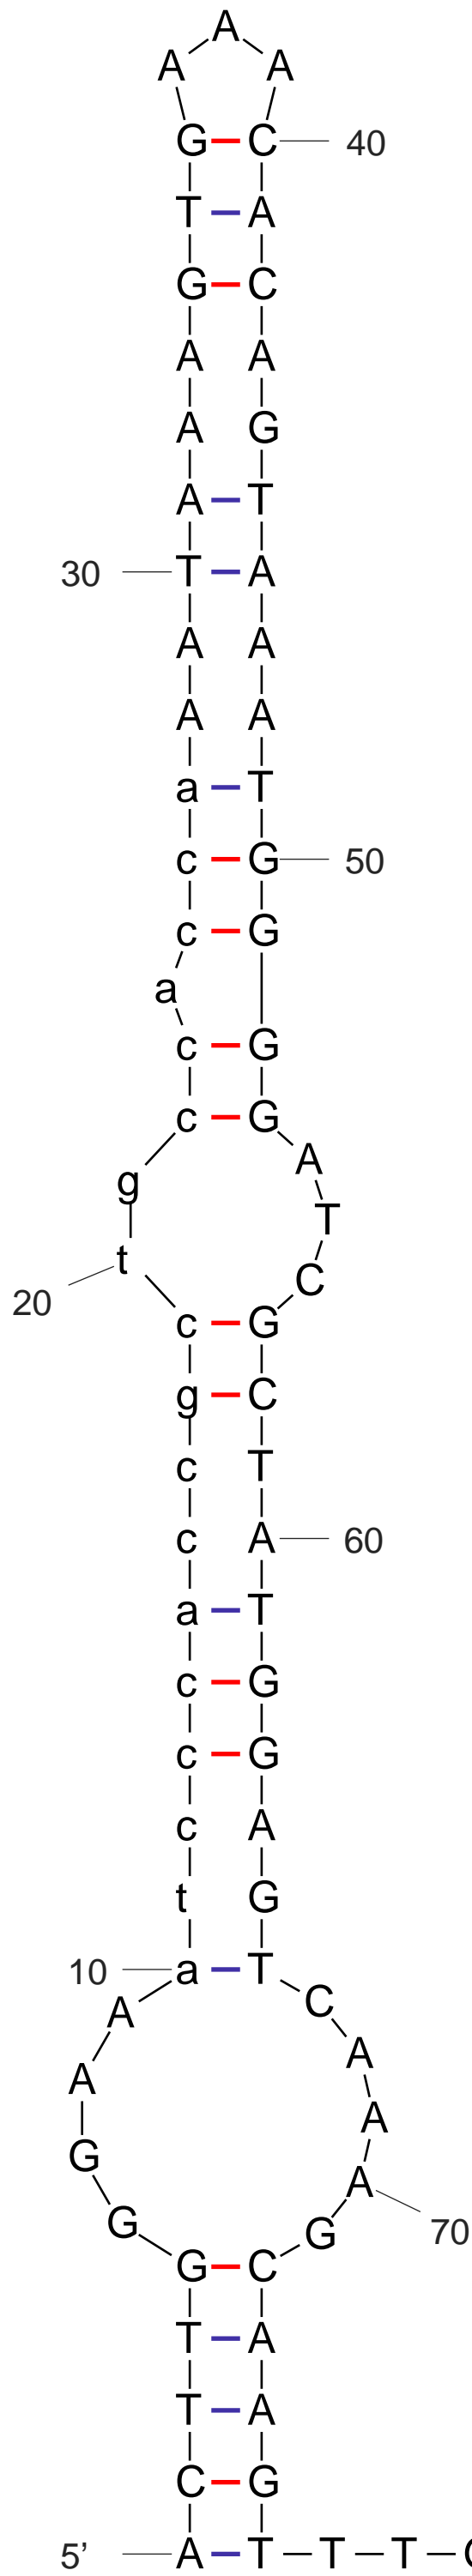

dG = -14.2 *cgr-mir-1260\_ss\_K1-P*

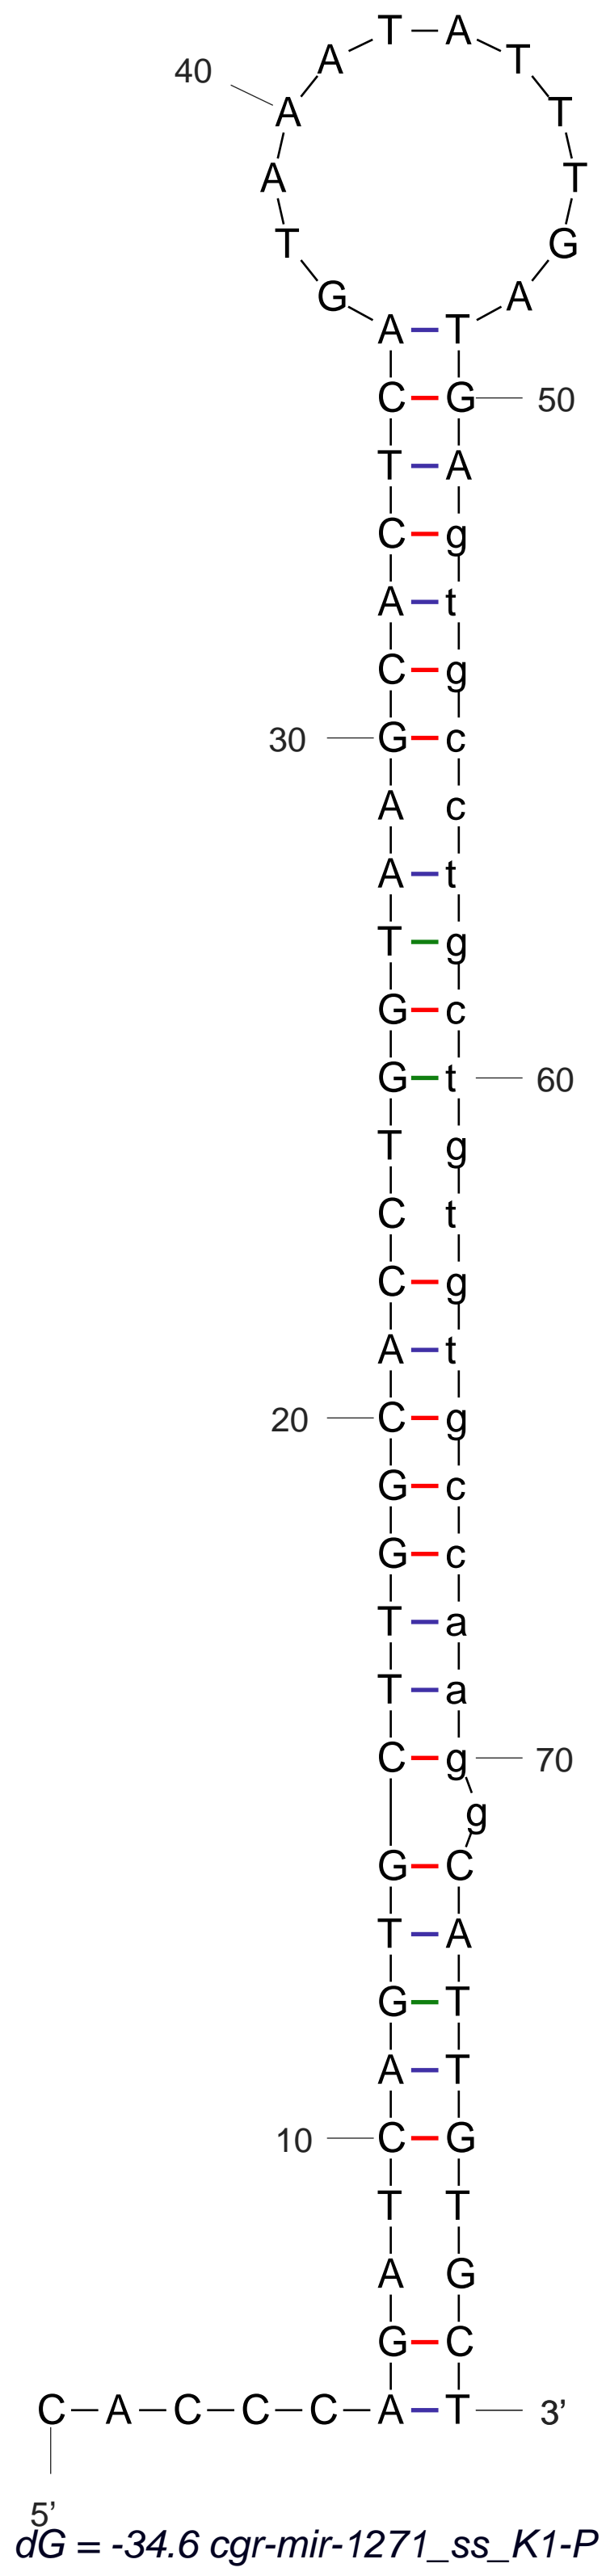

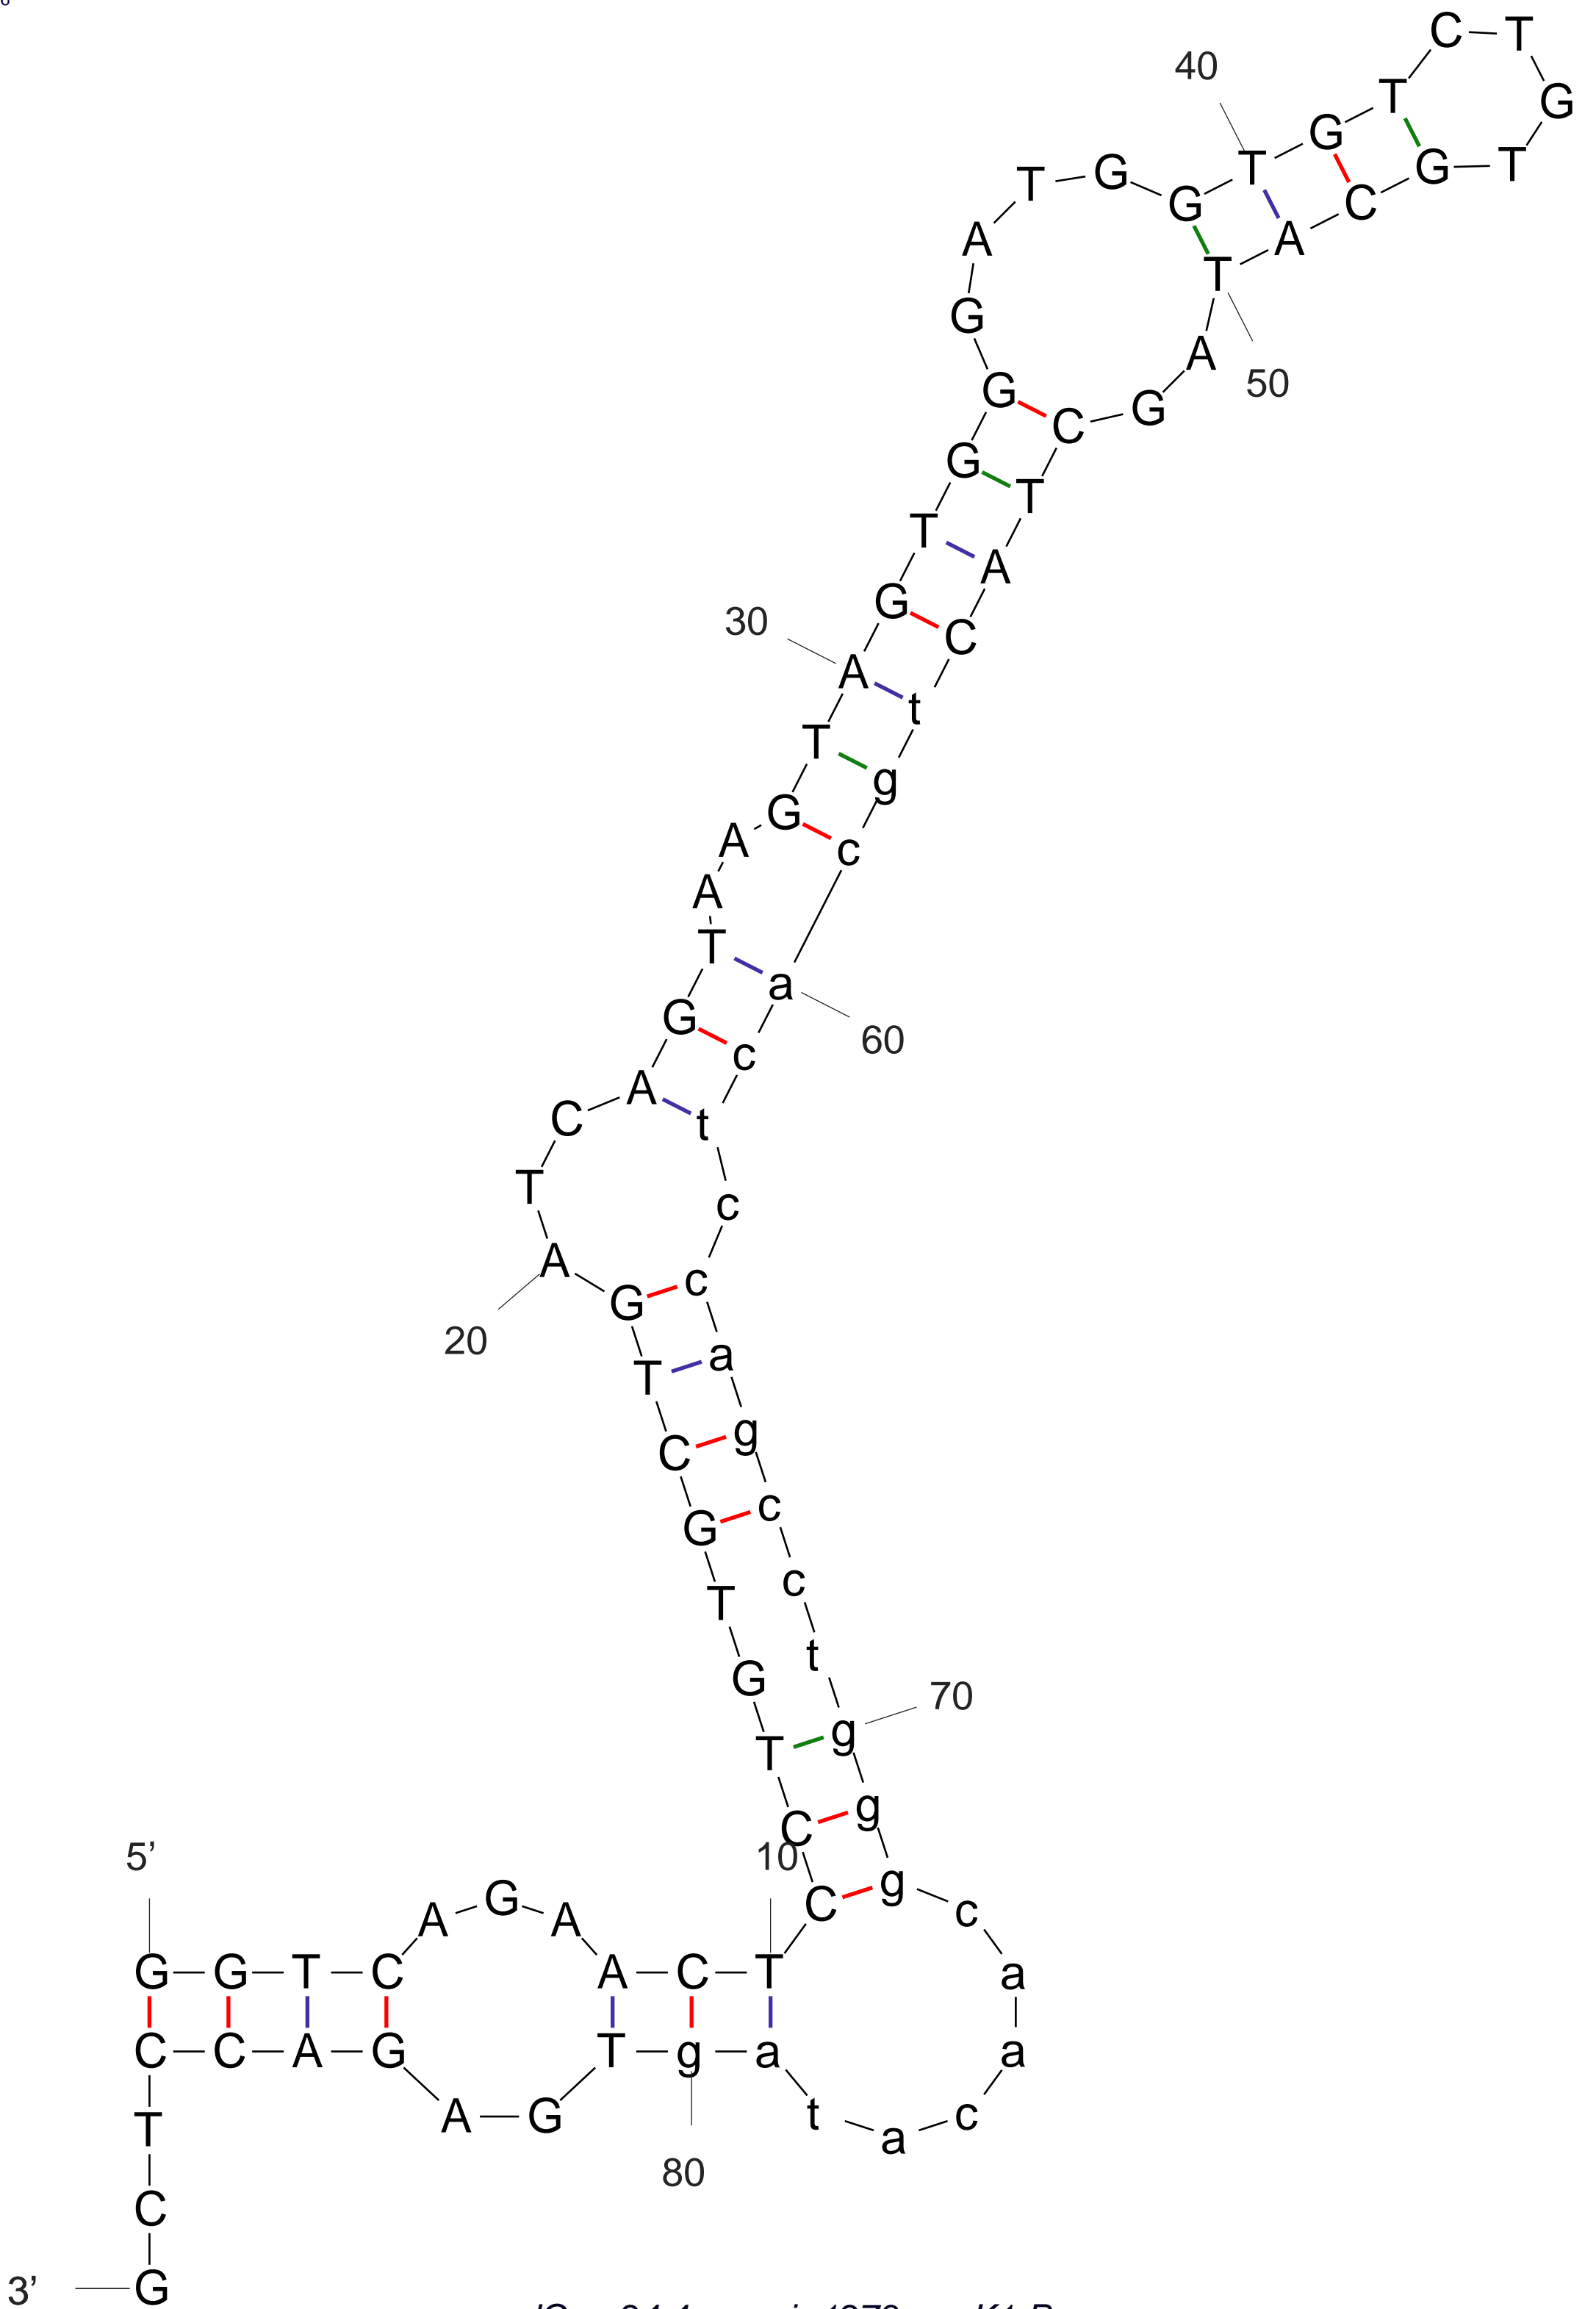



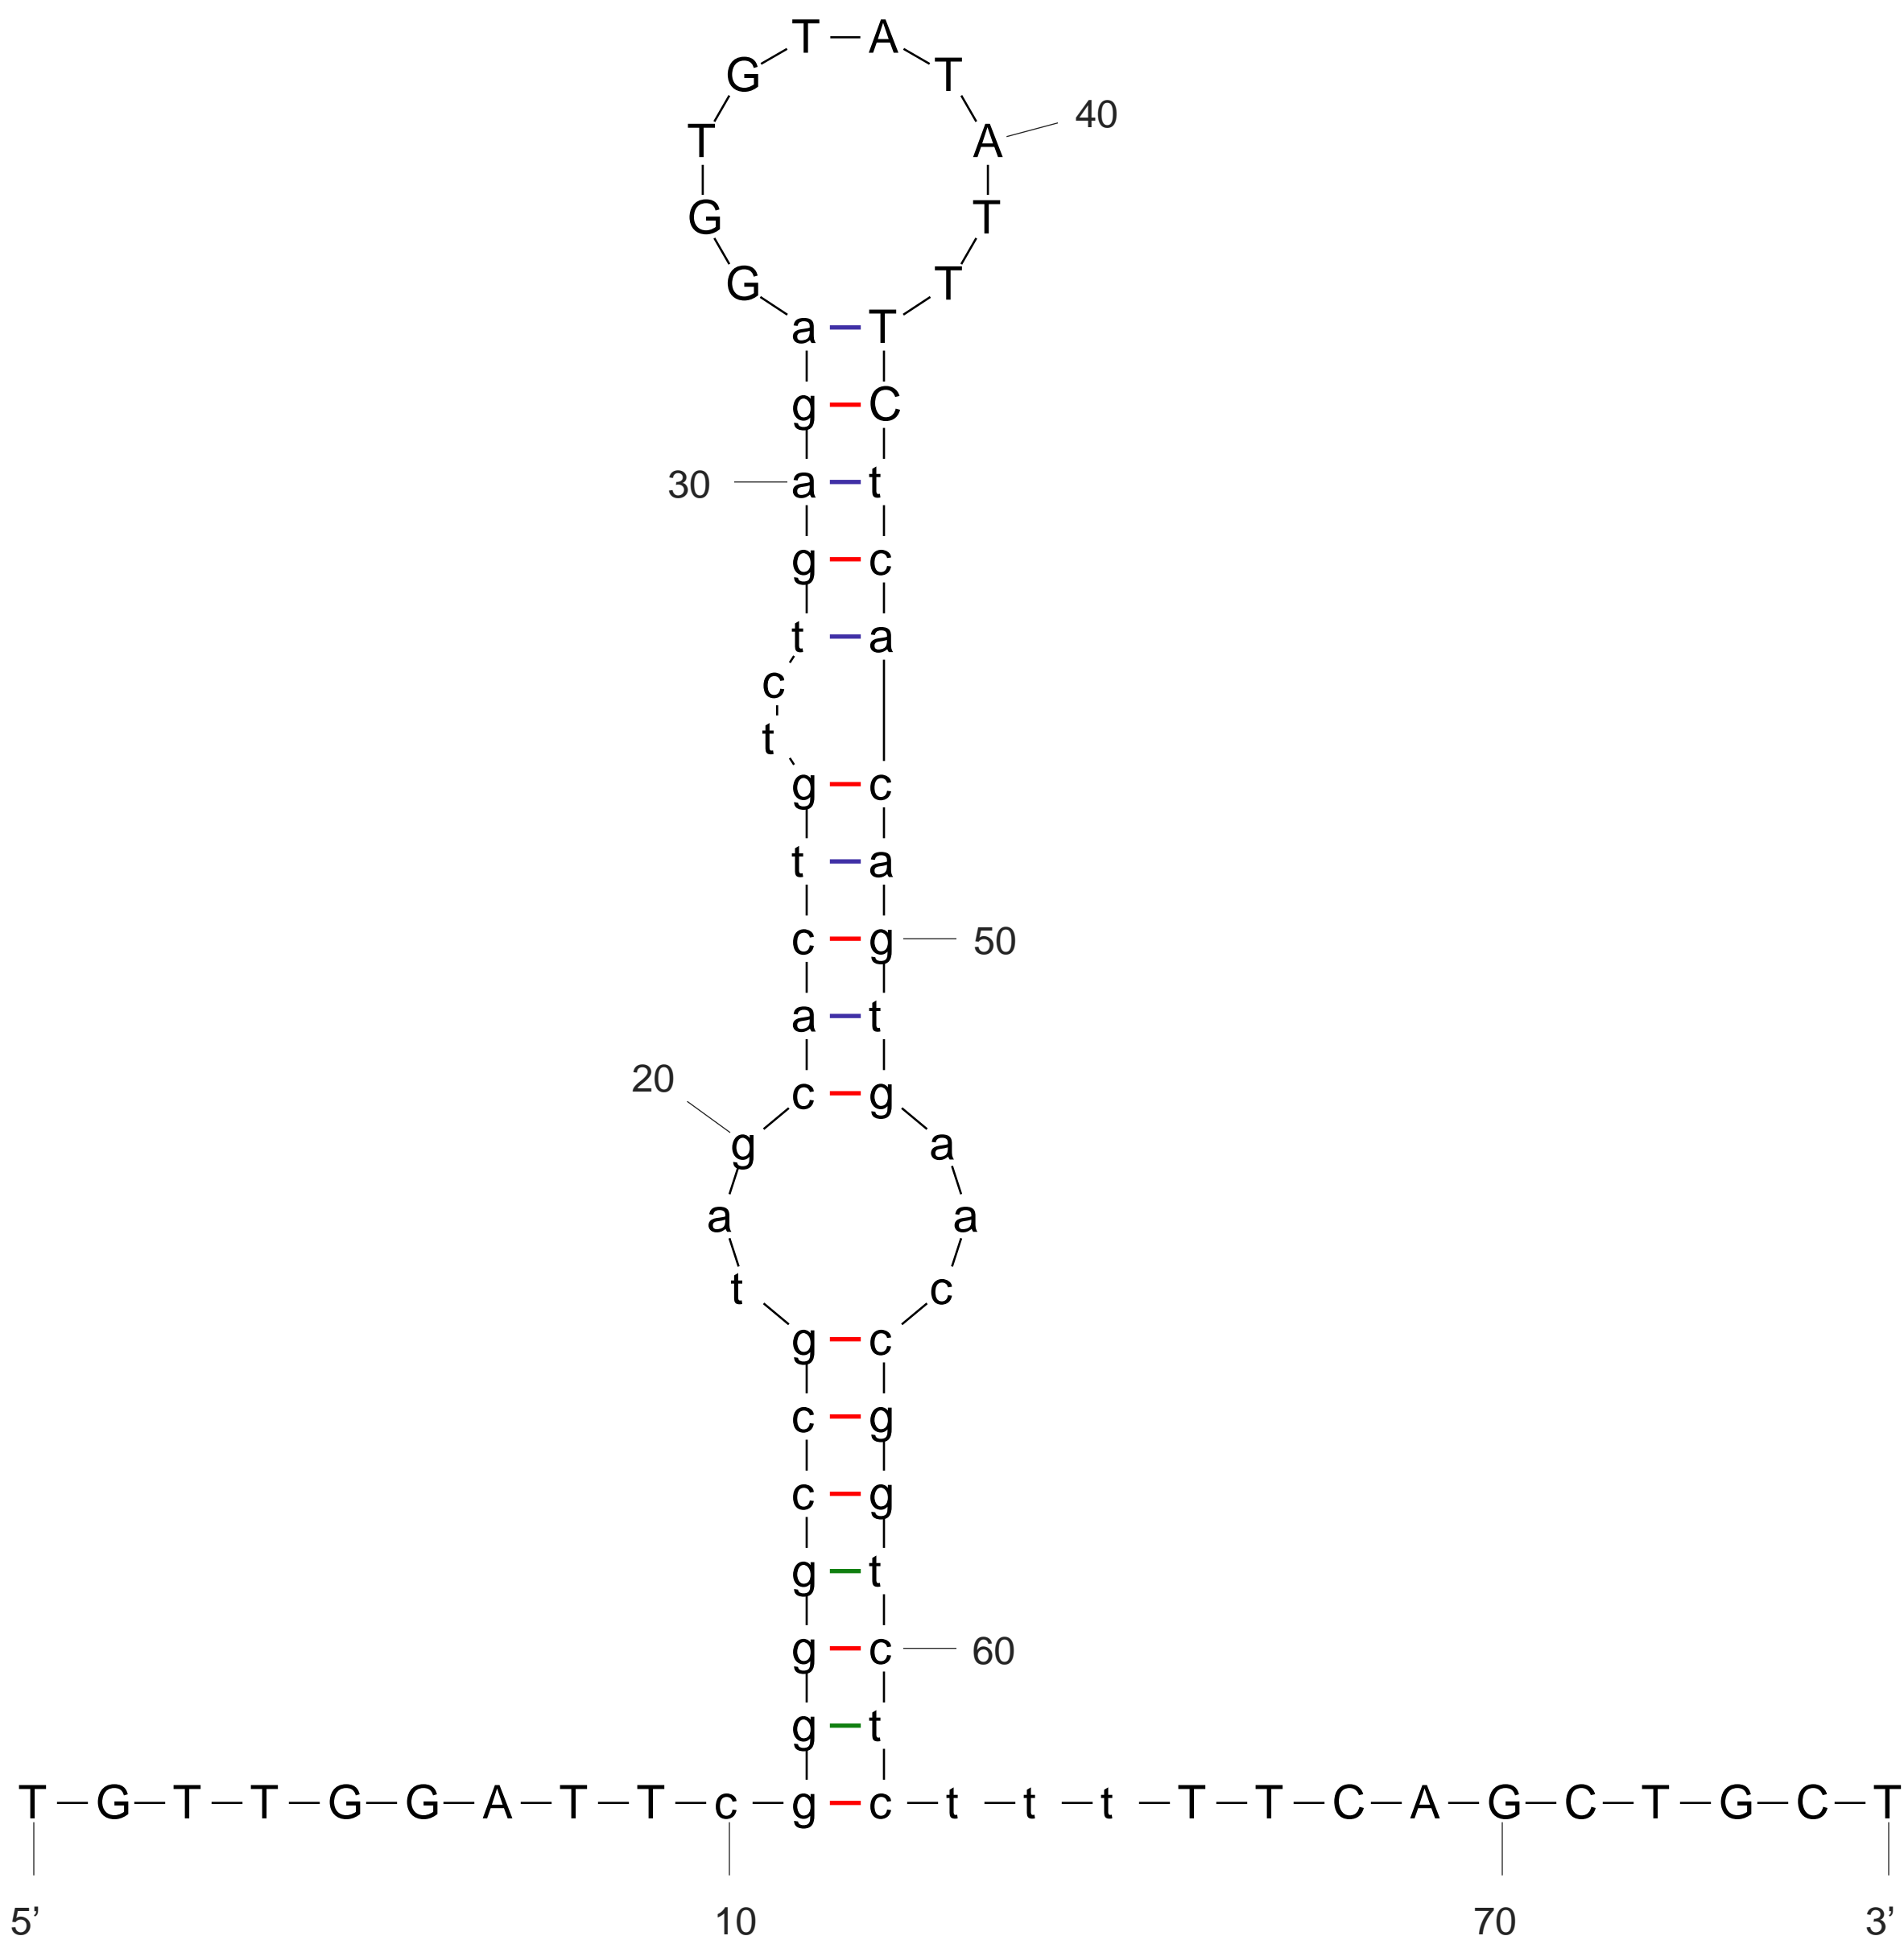



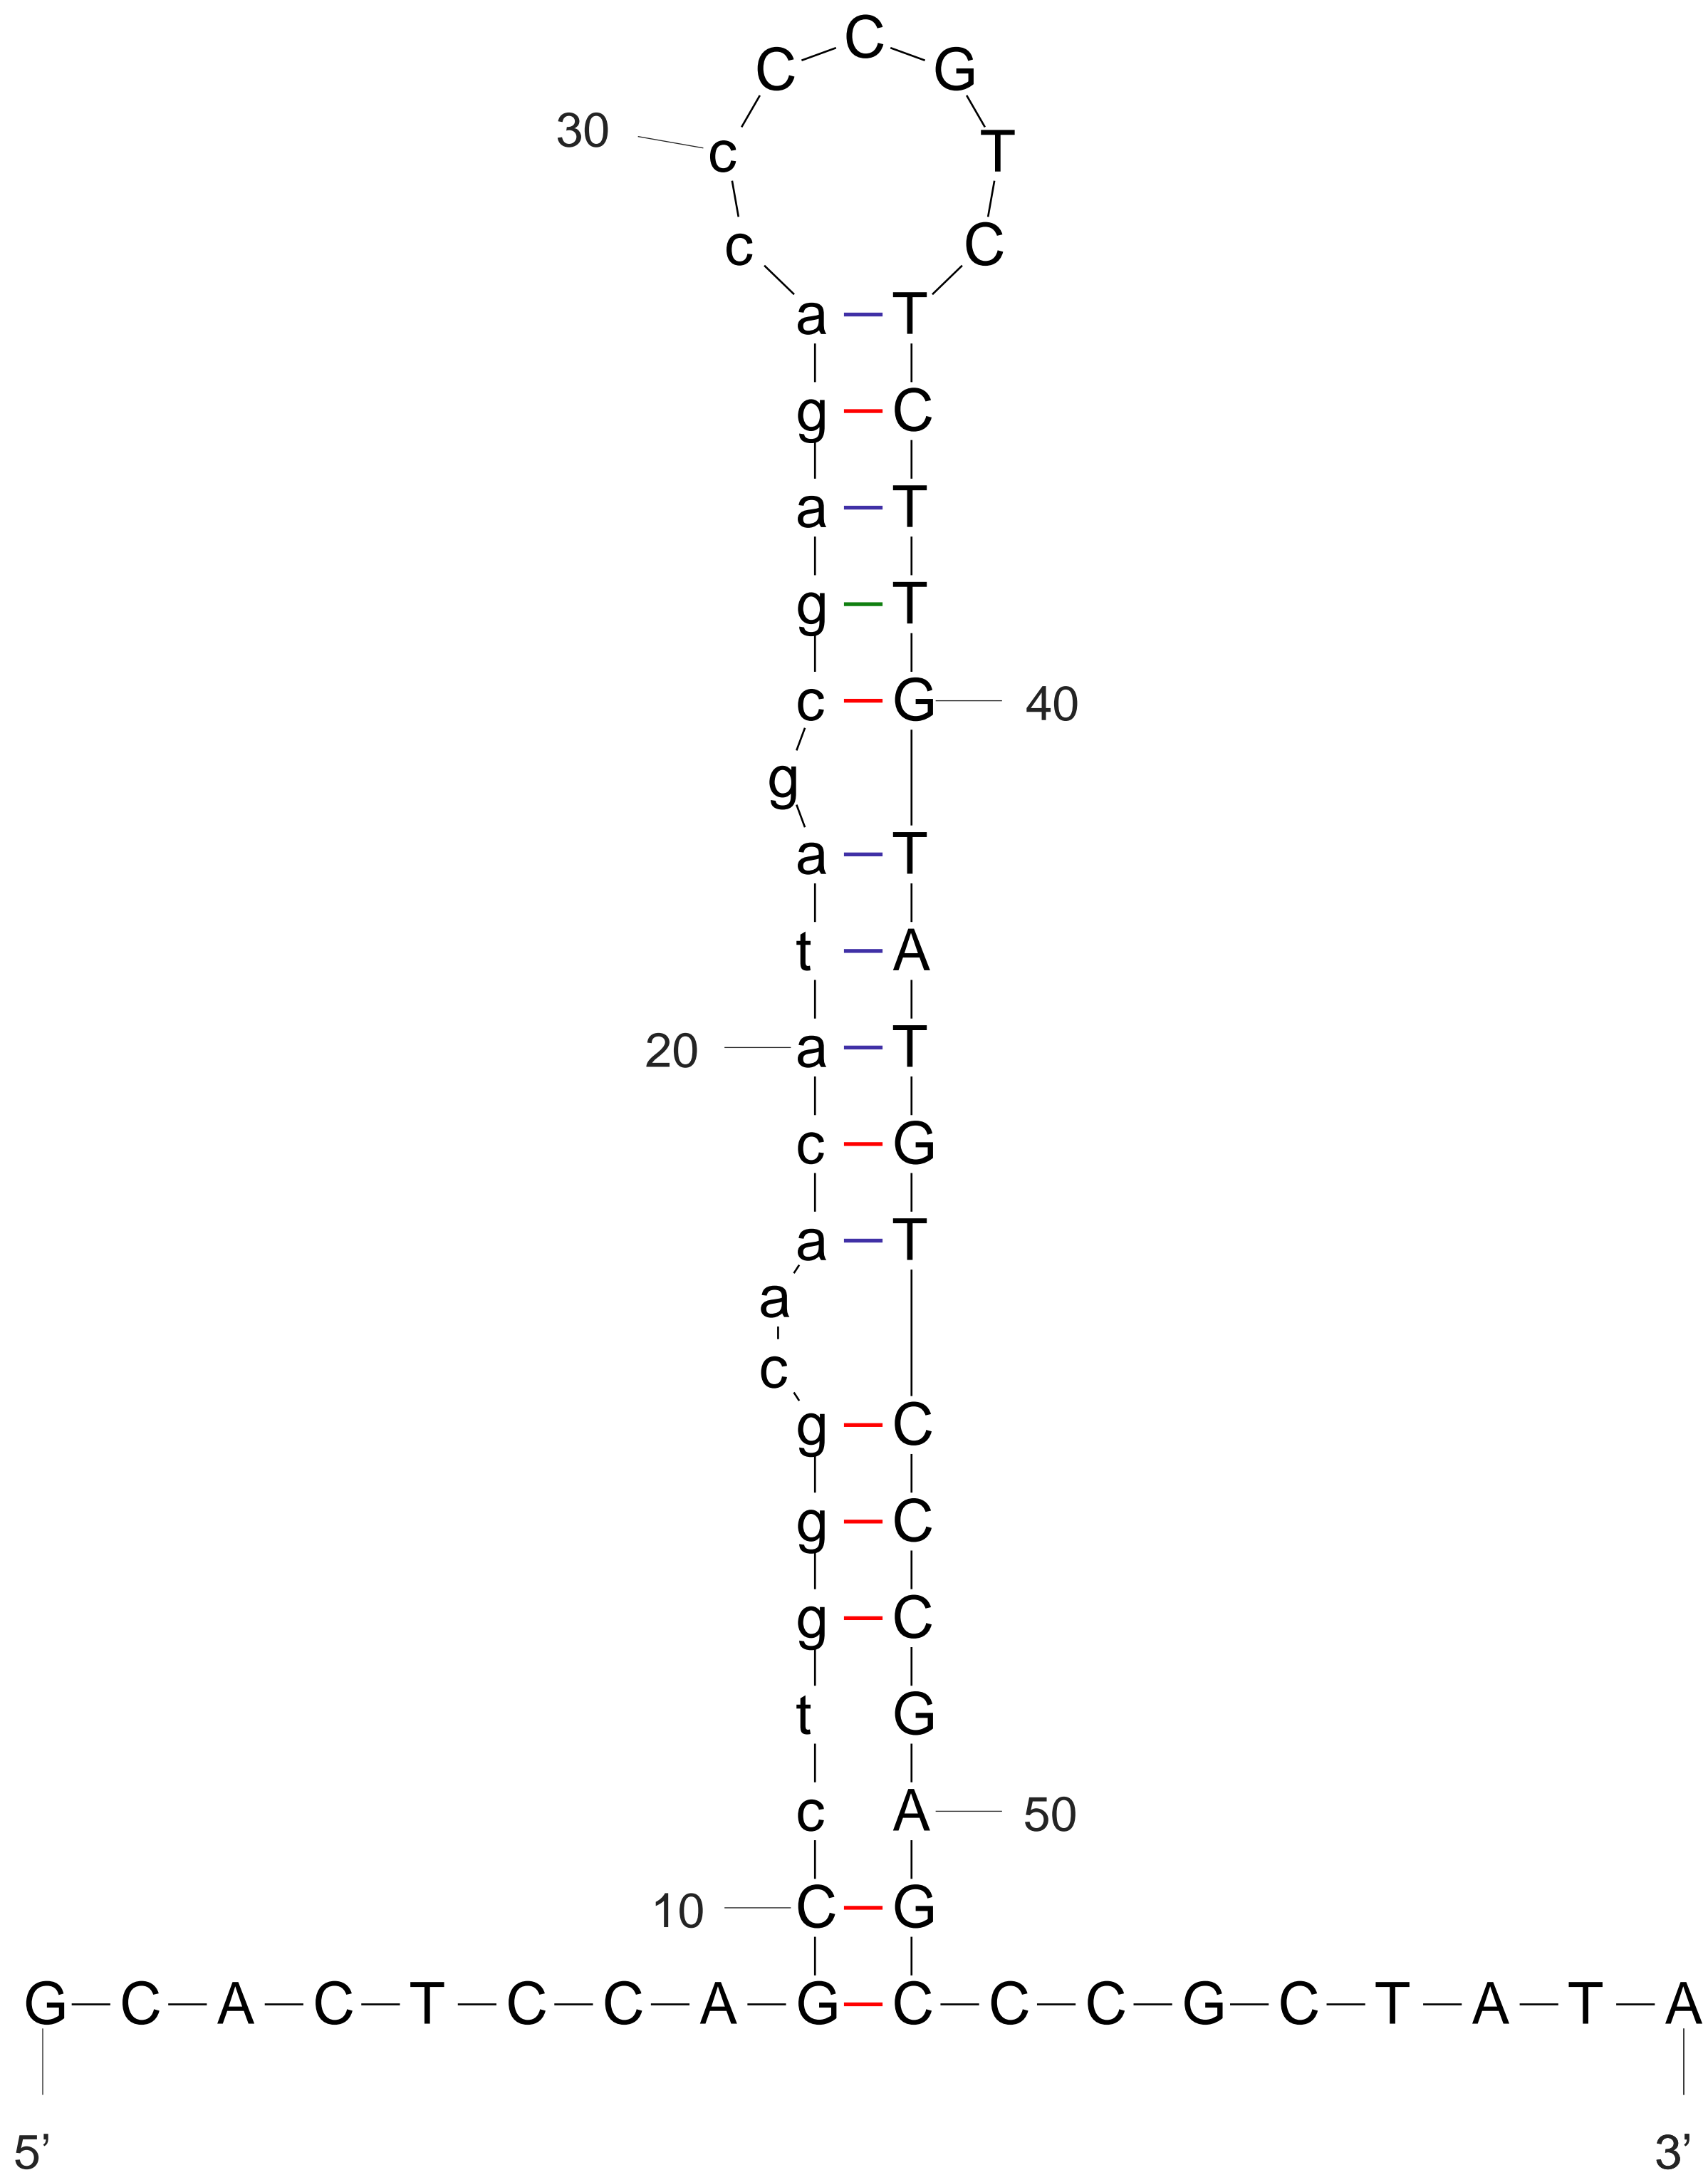

dG = -14.3 cgr-mir-1303

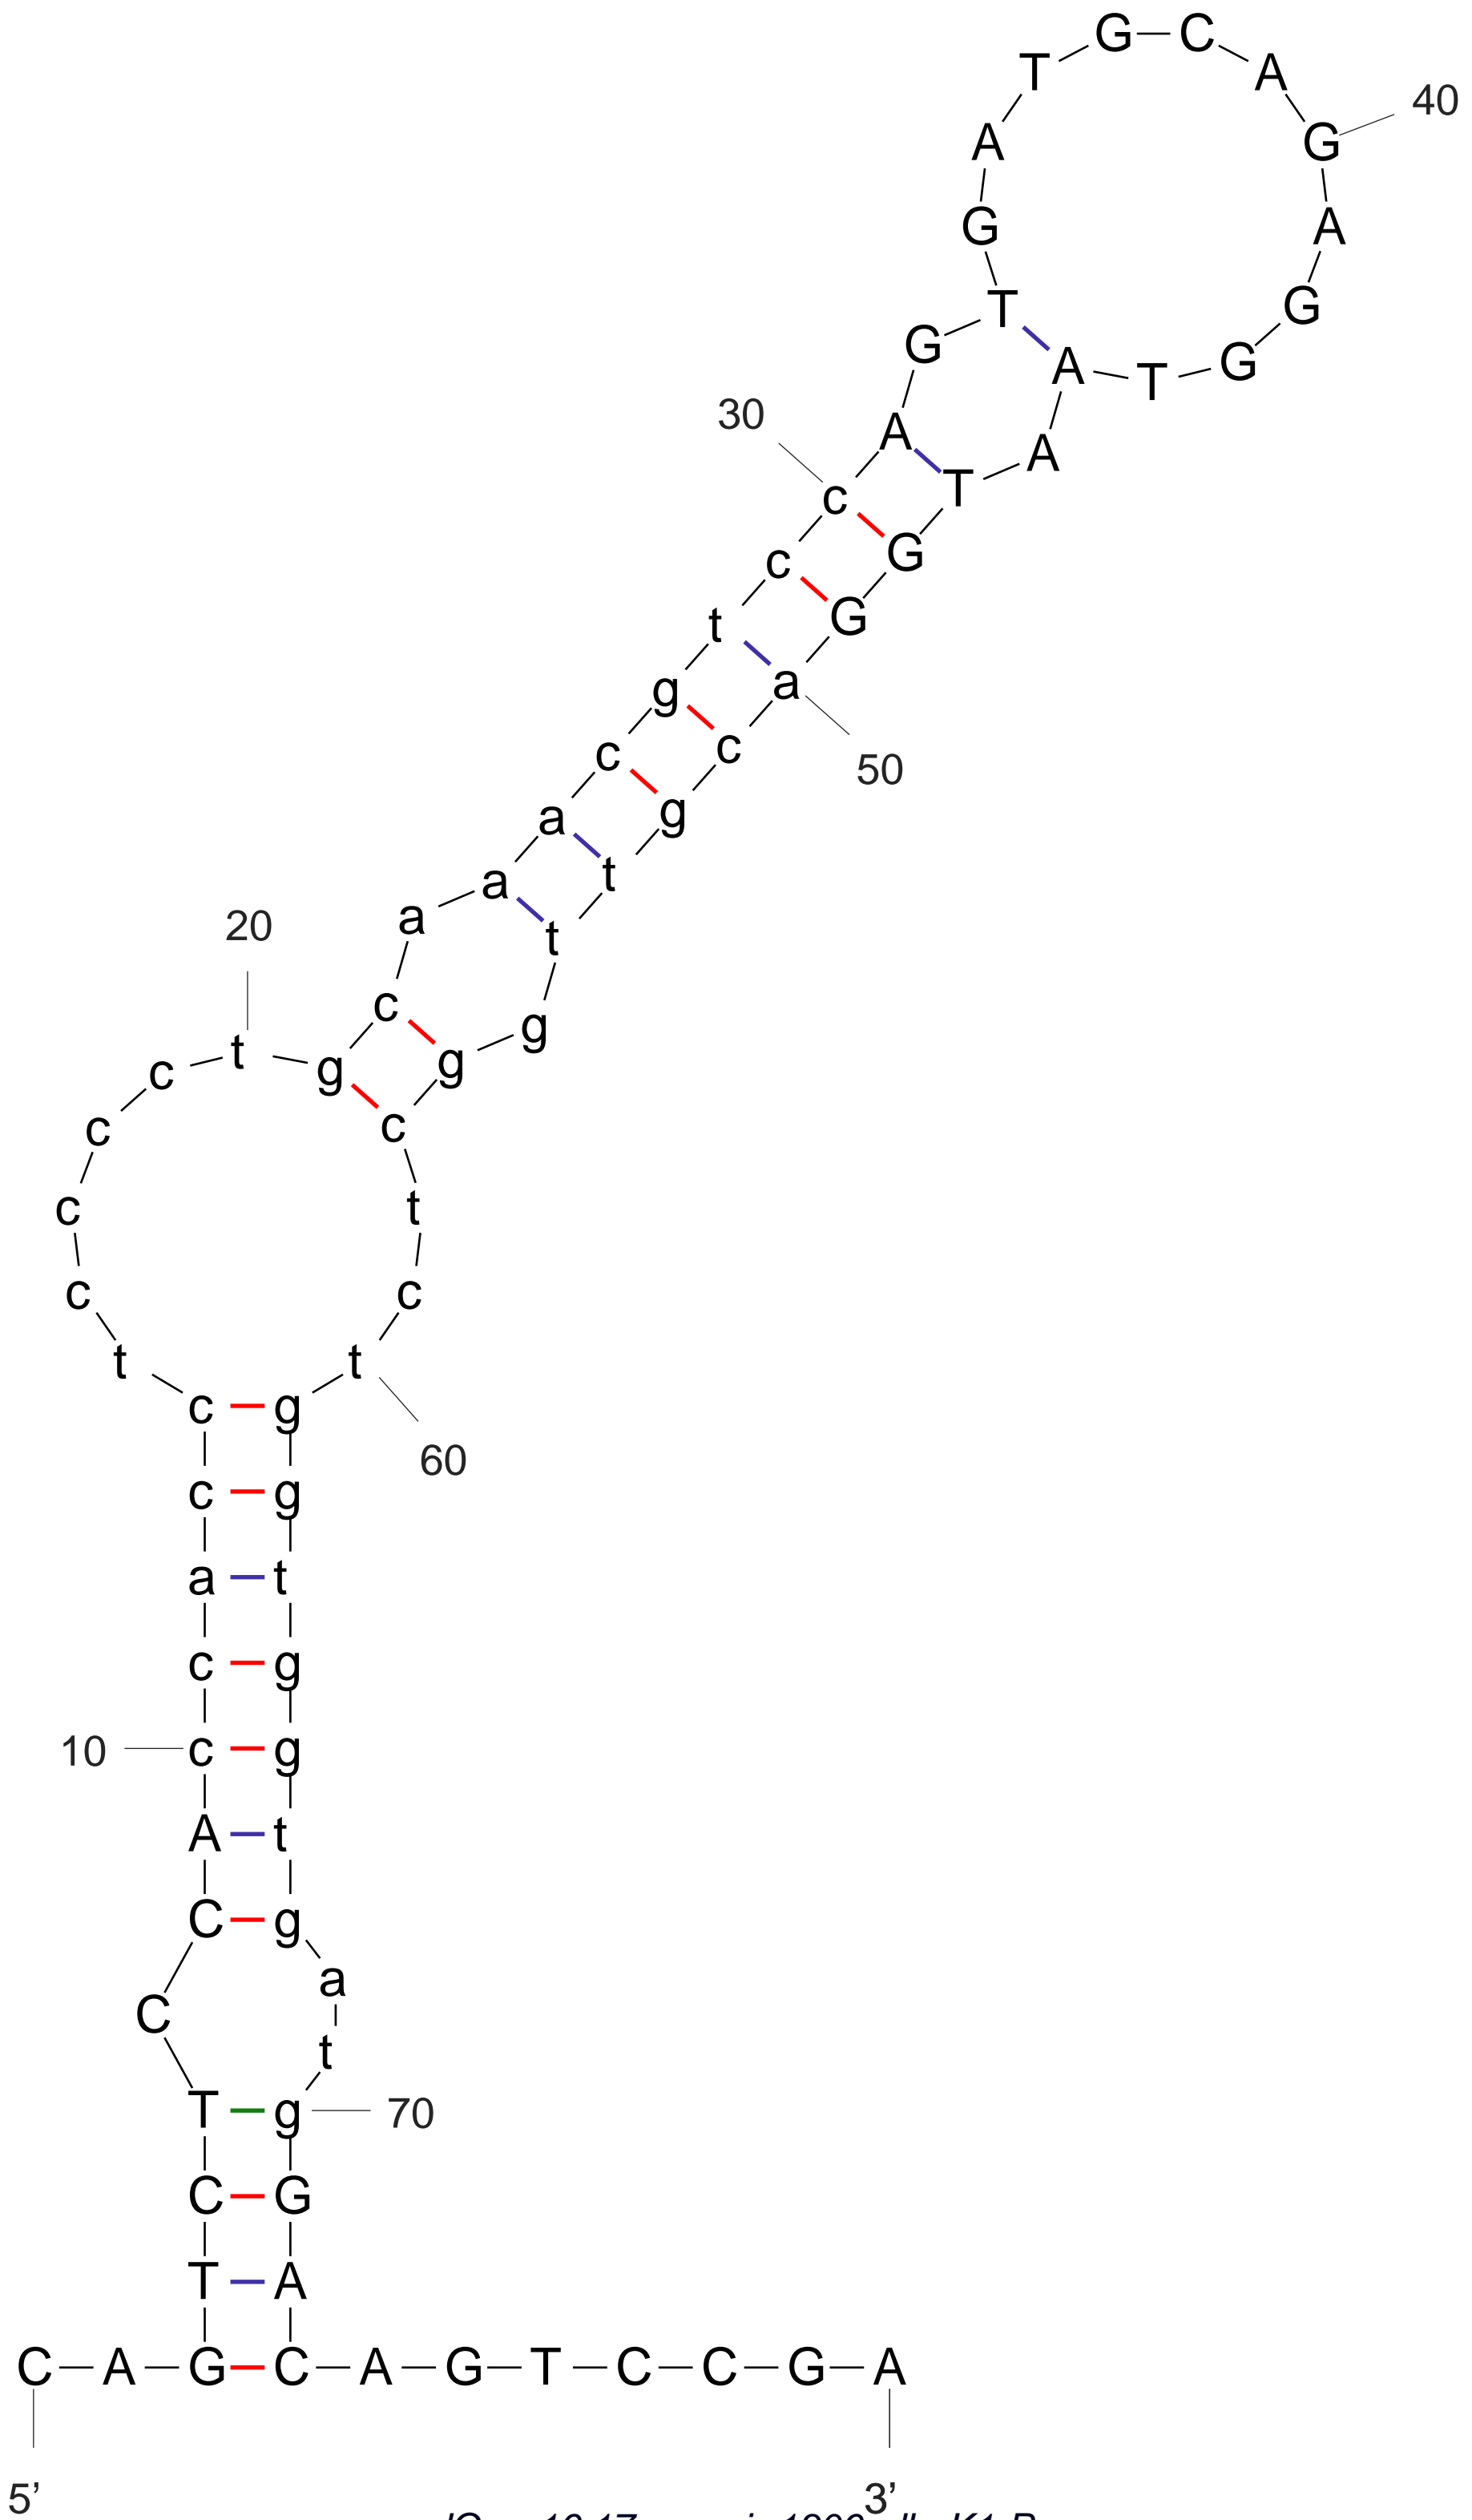

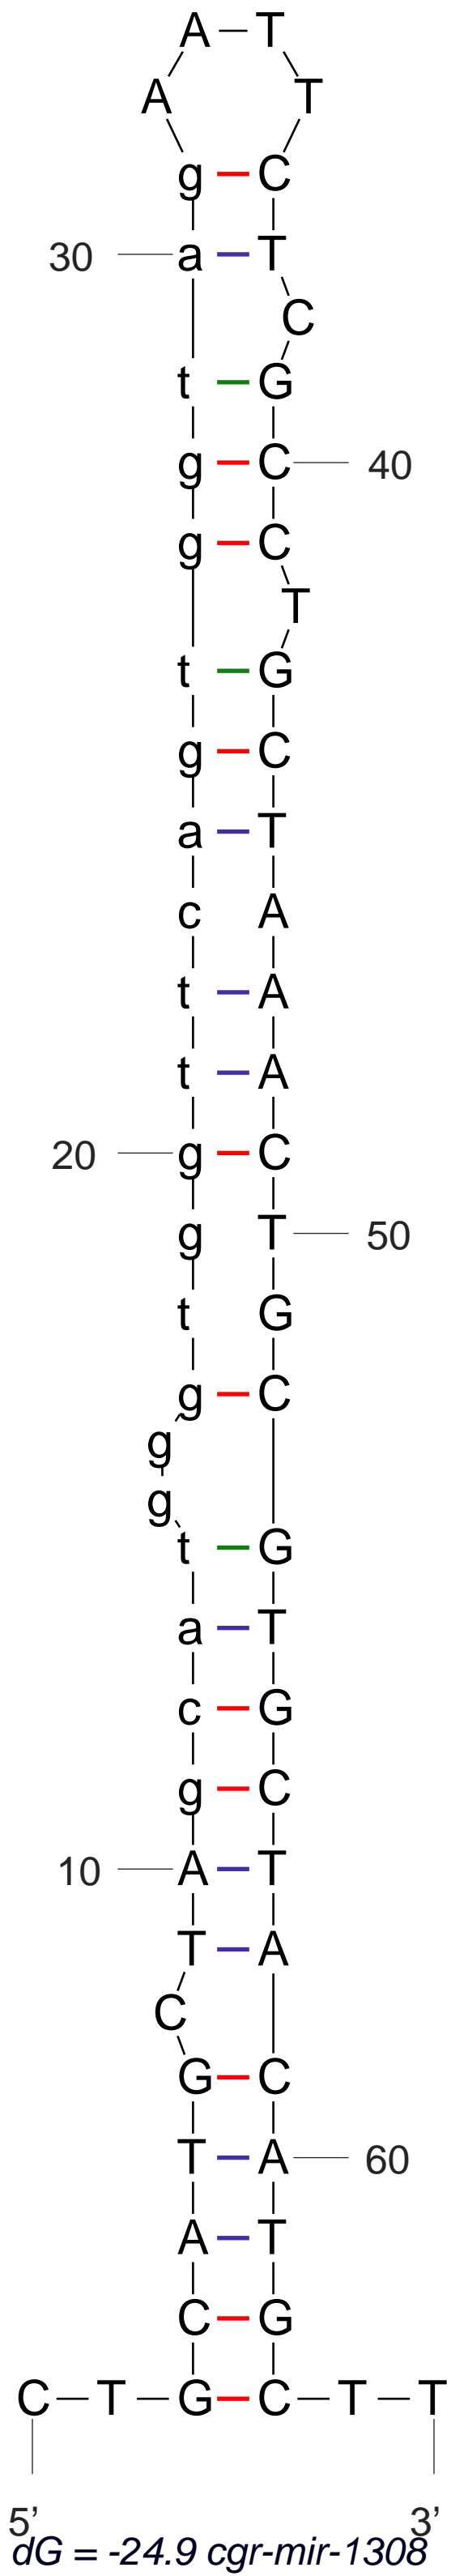

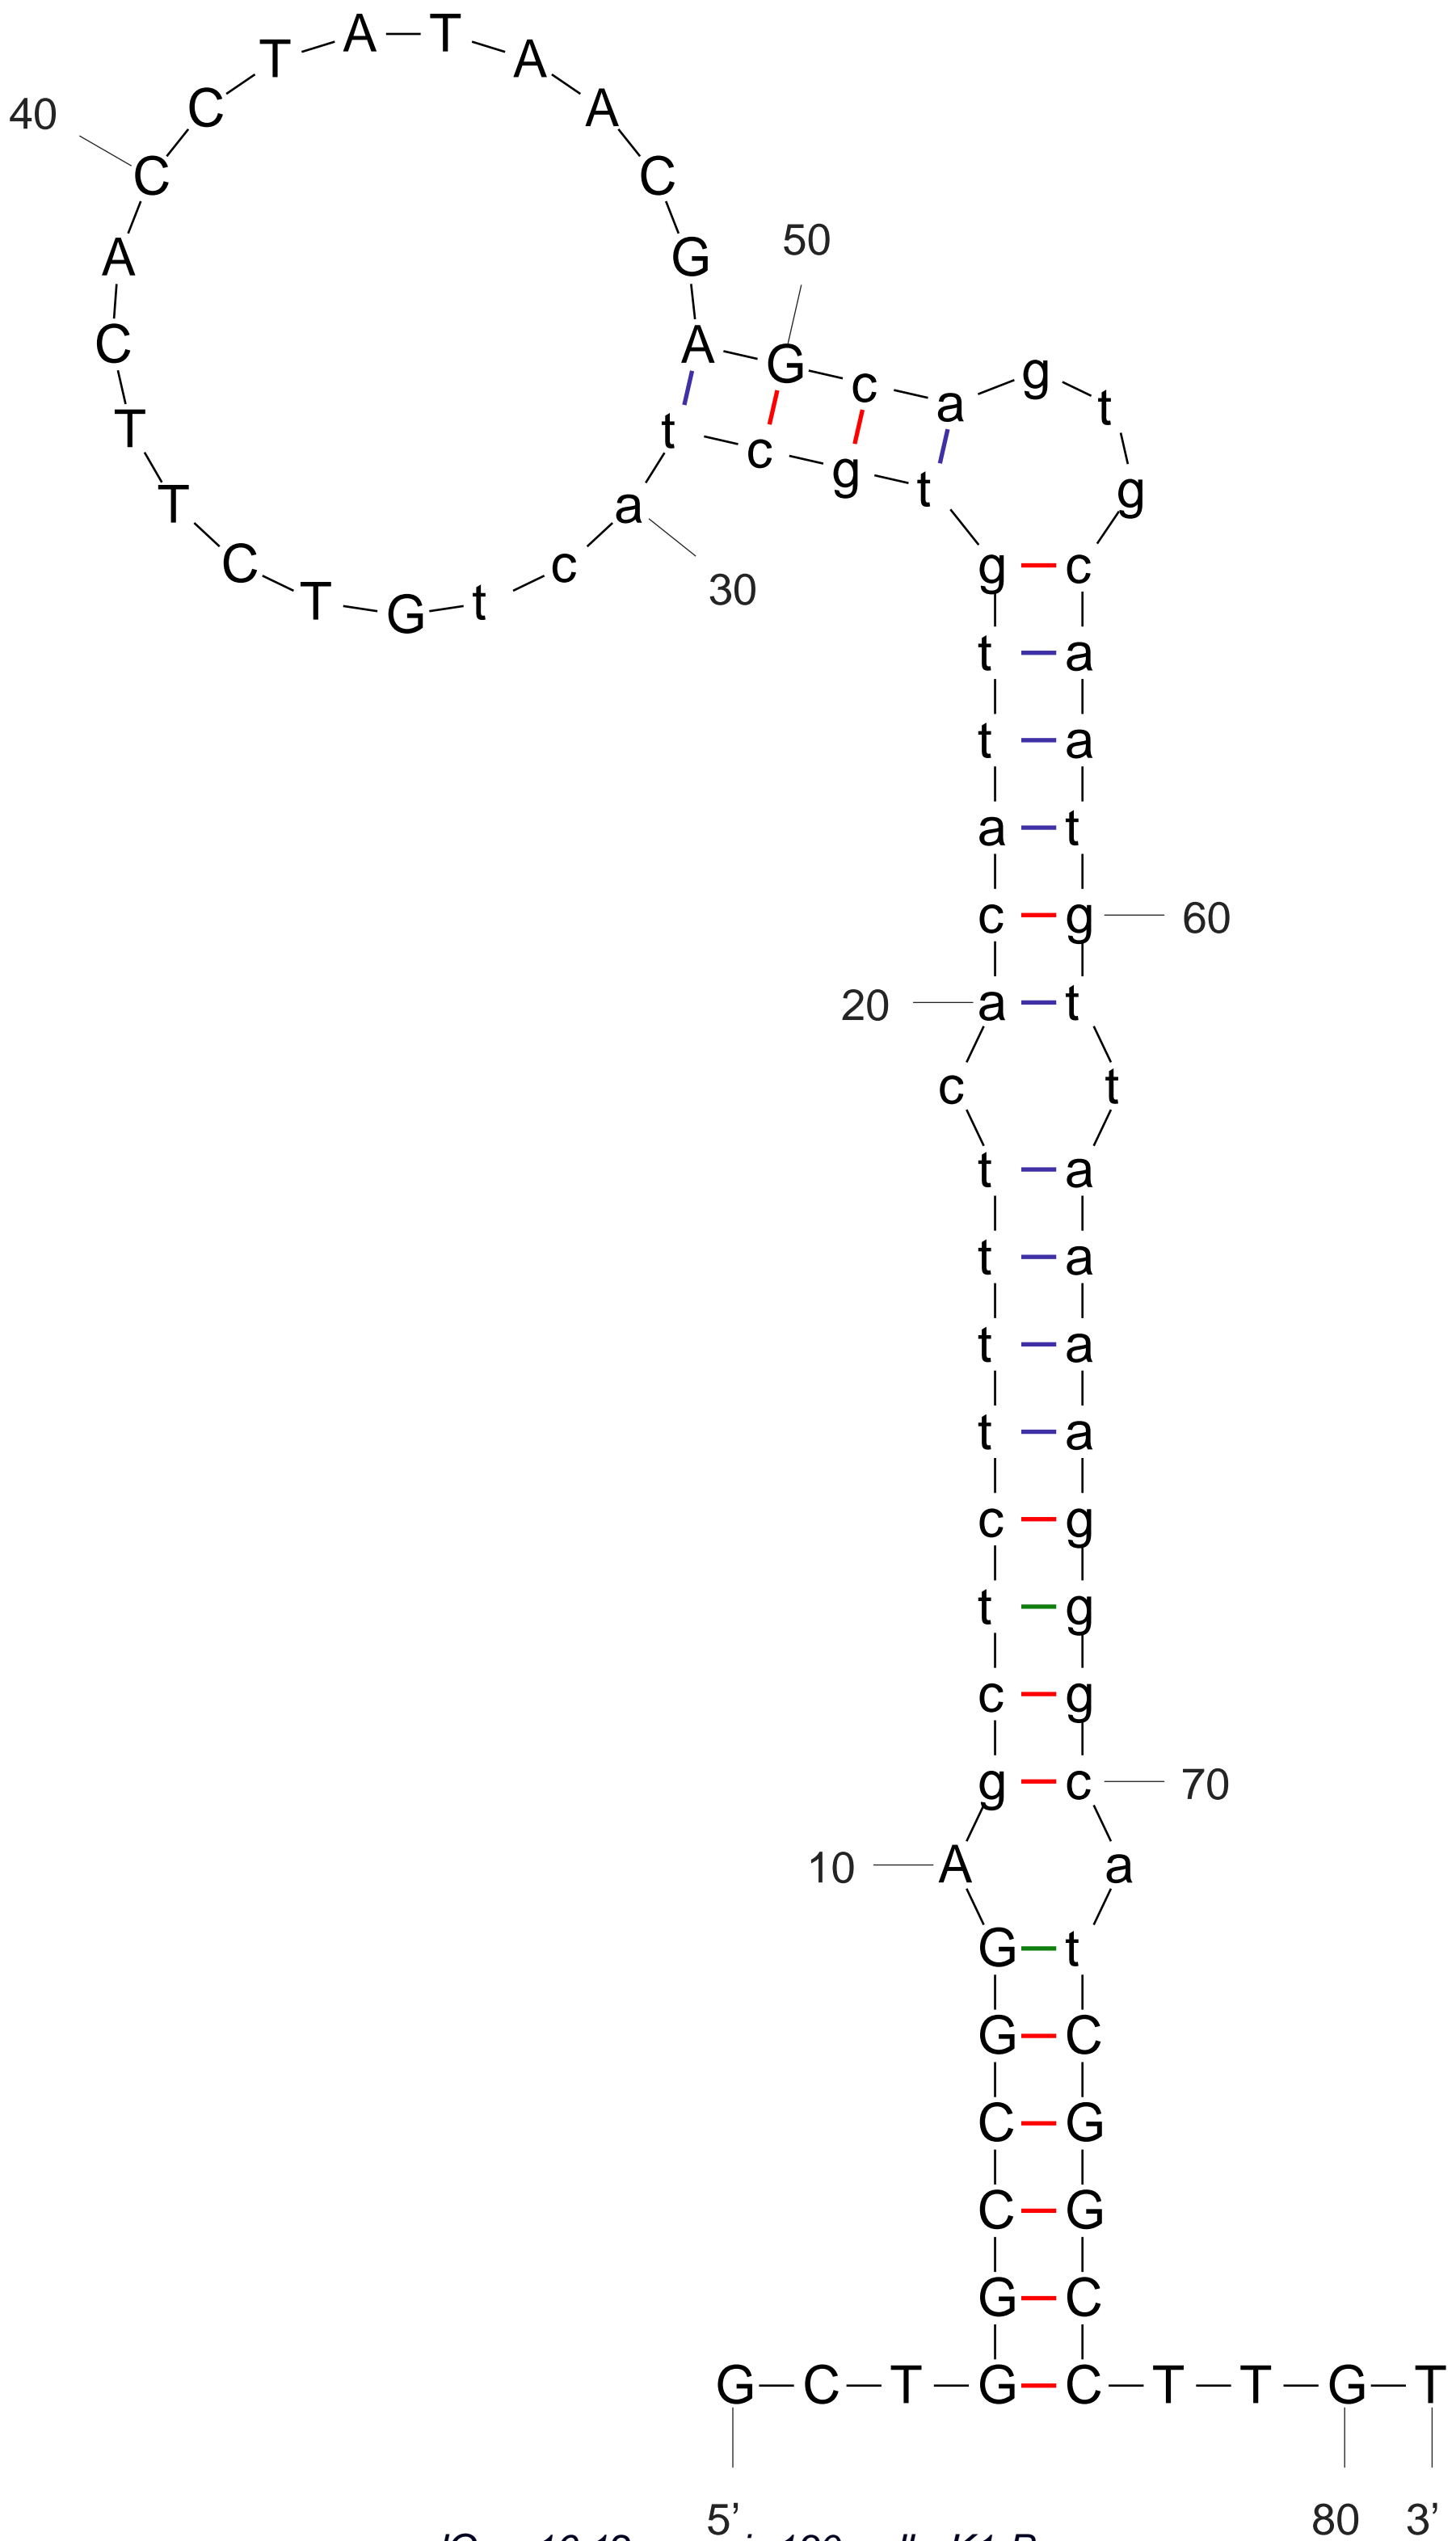



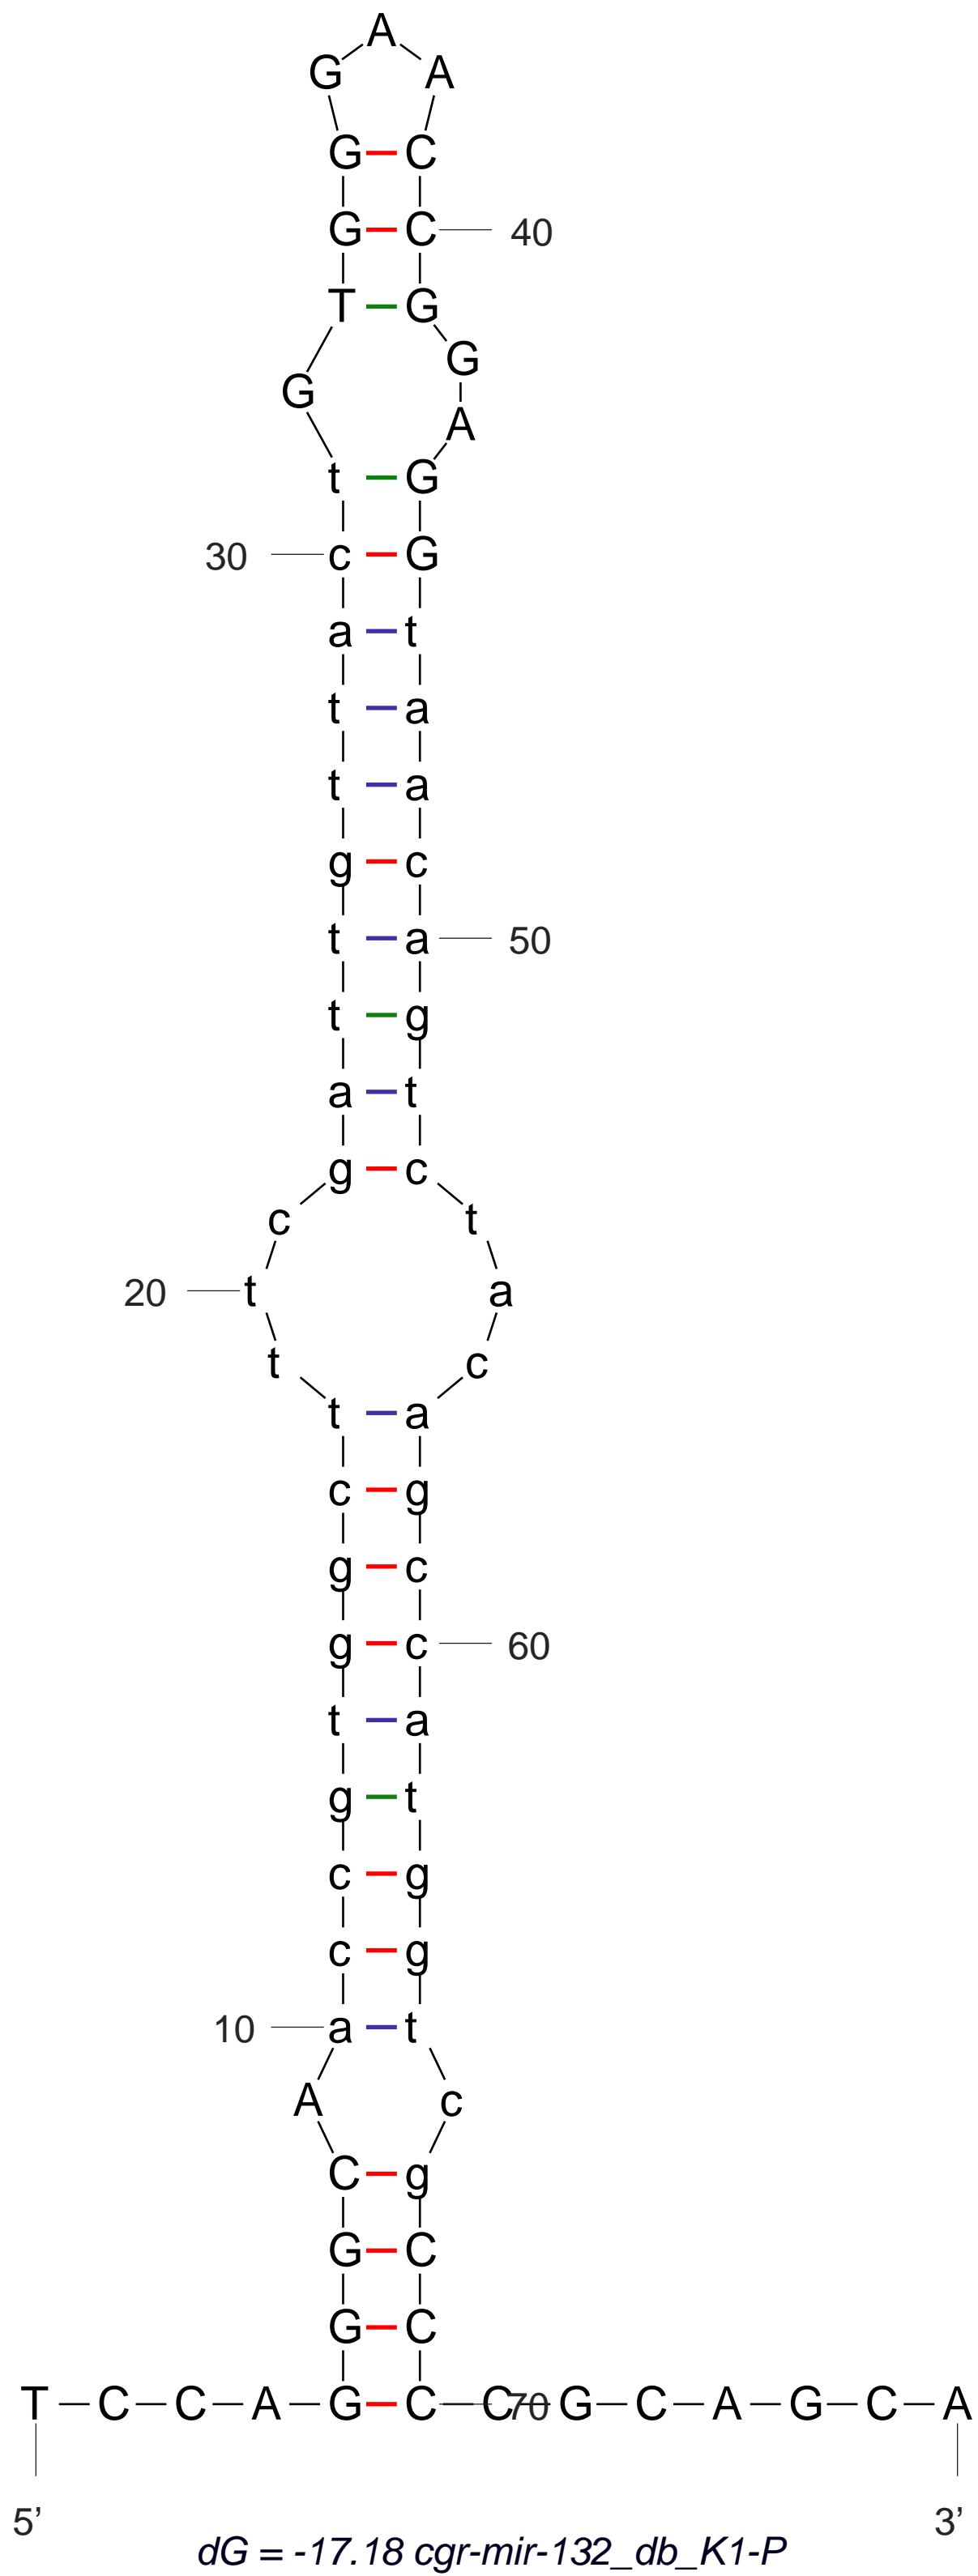



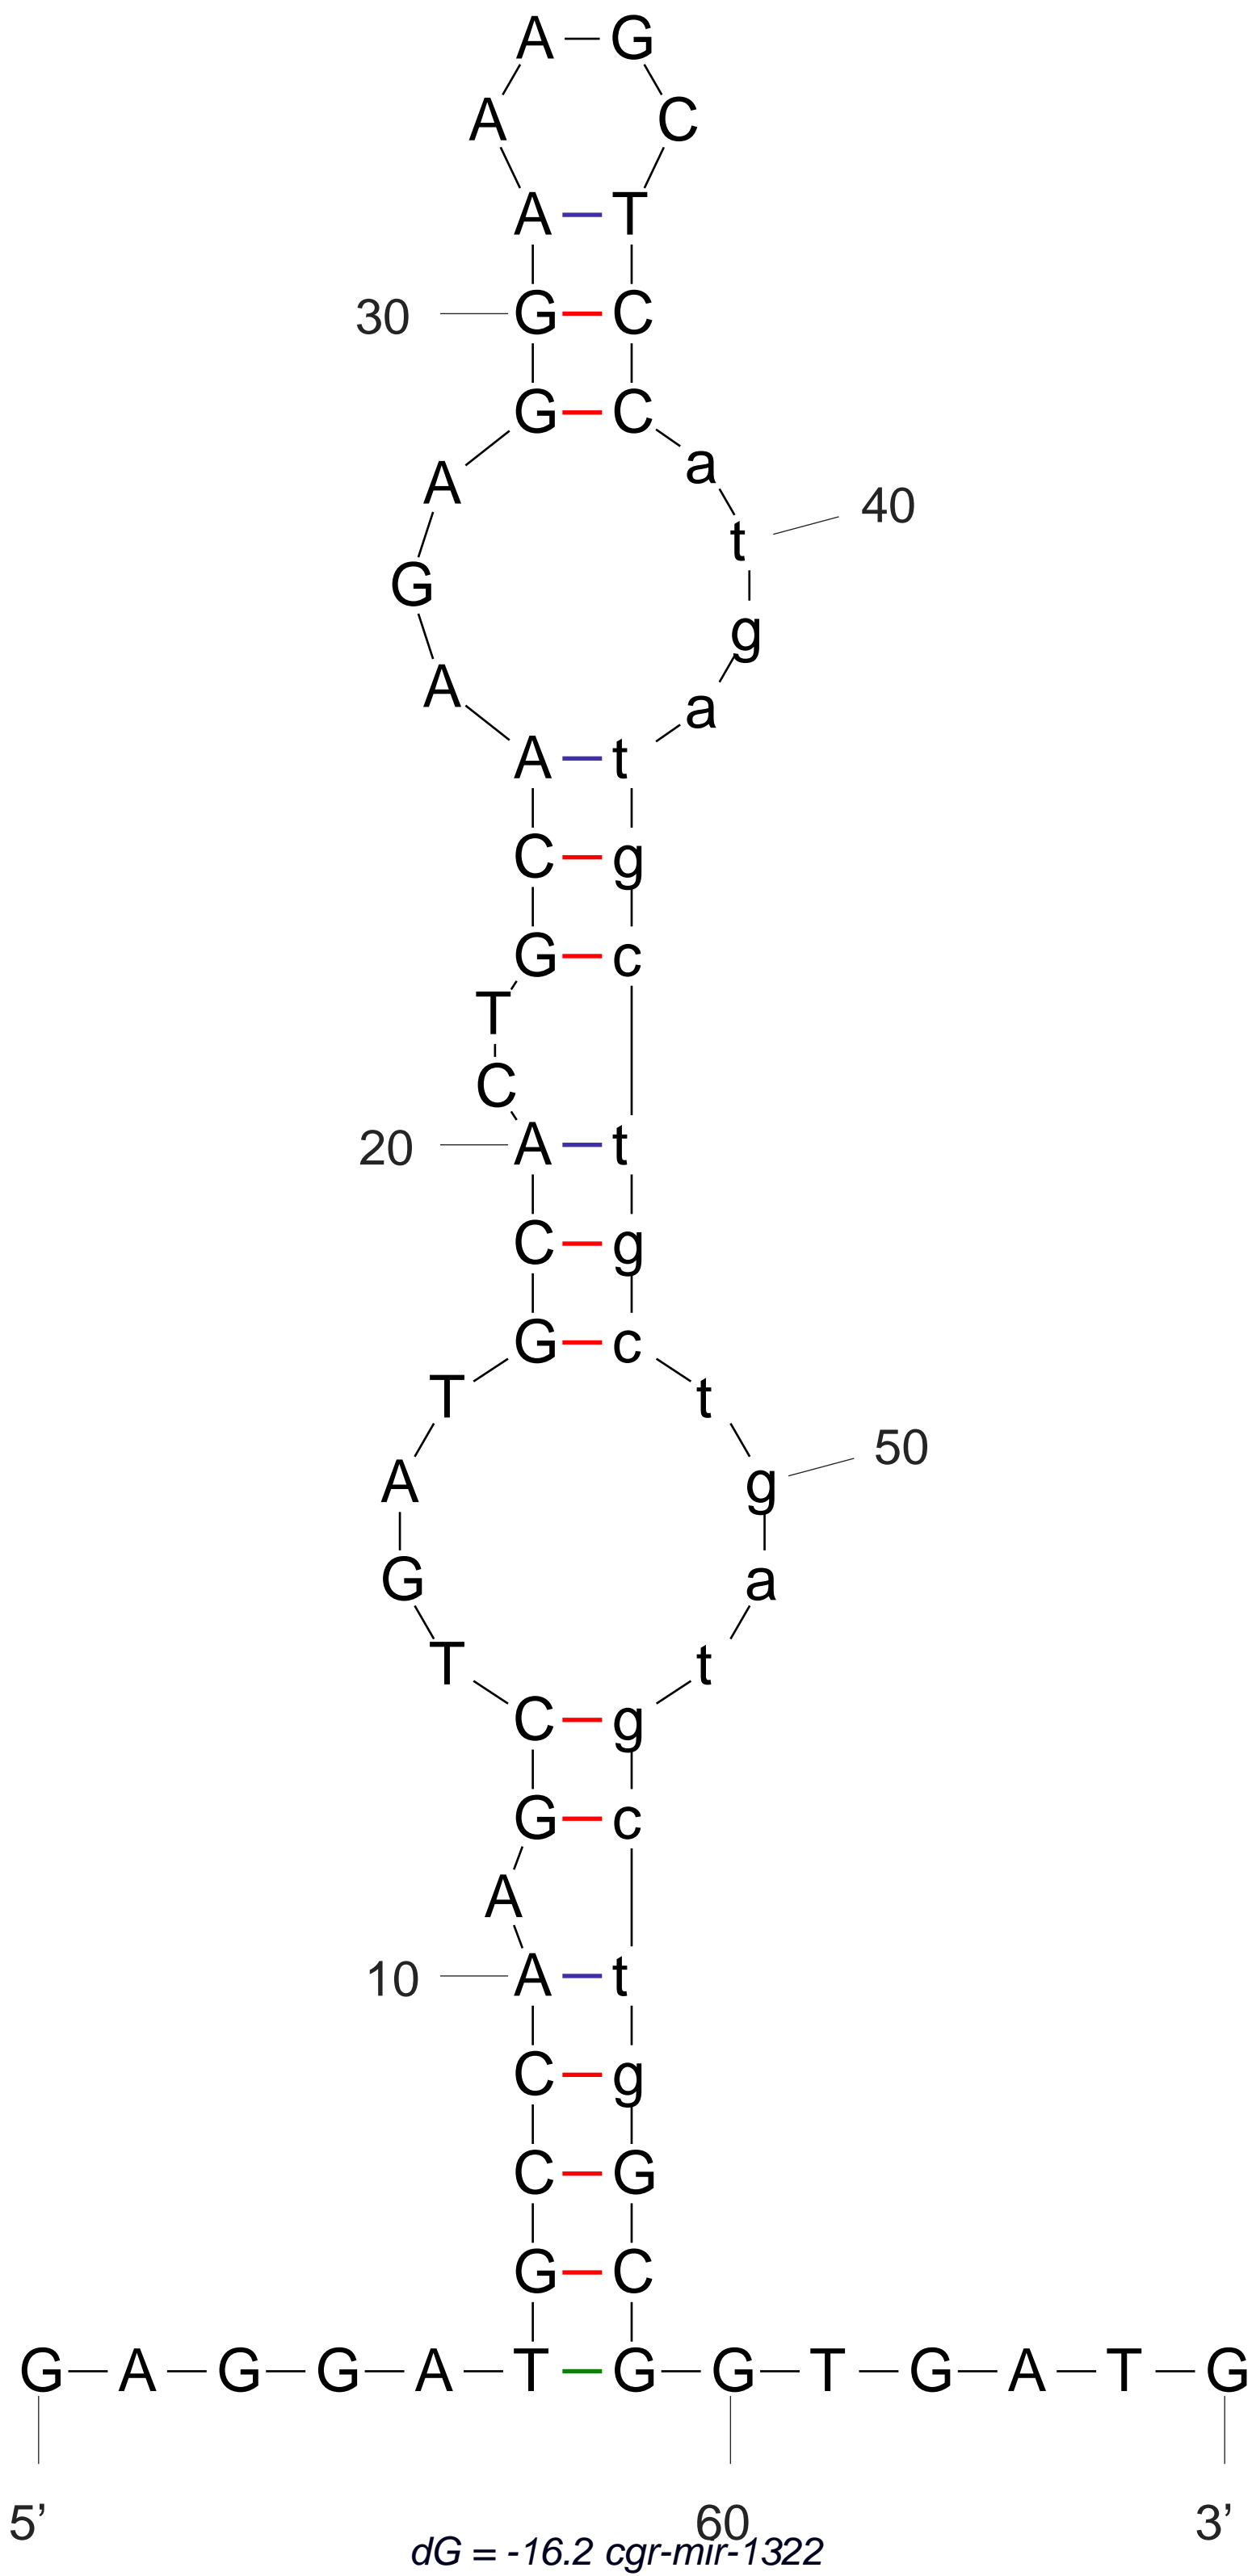

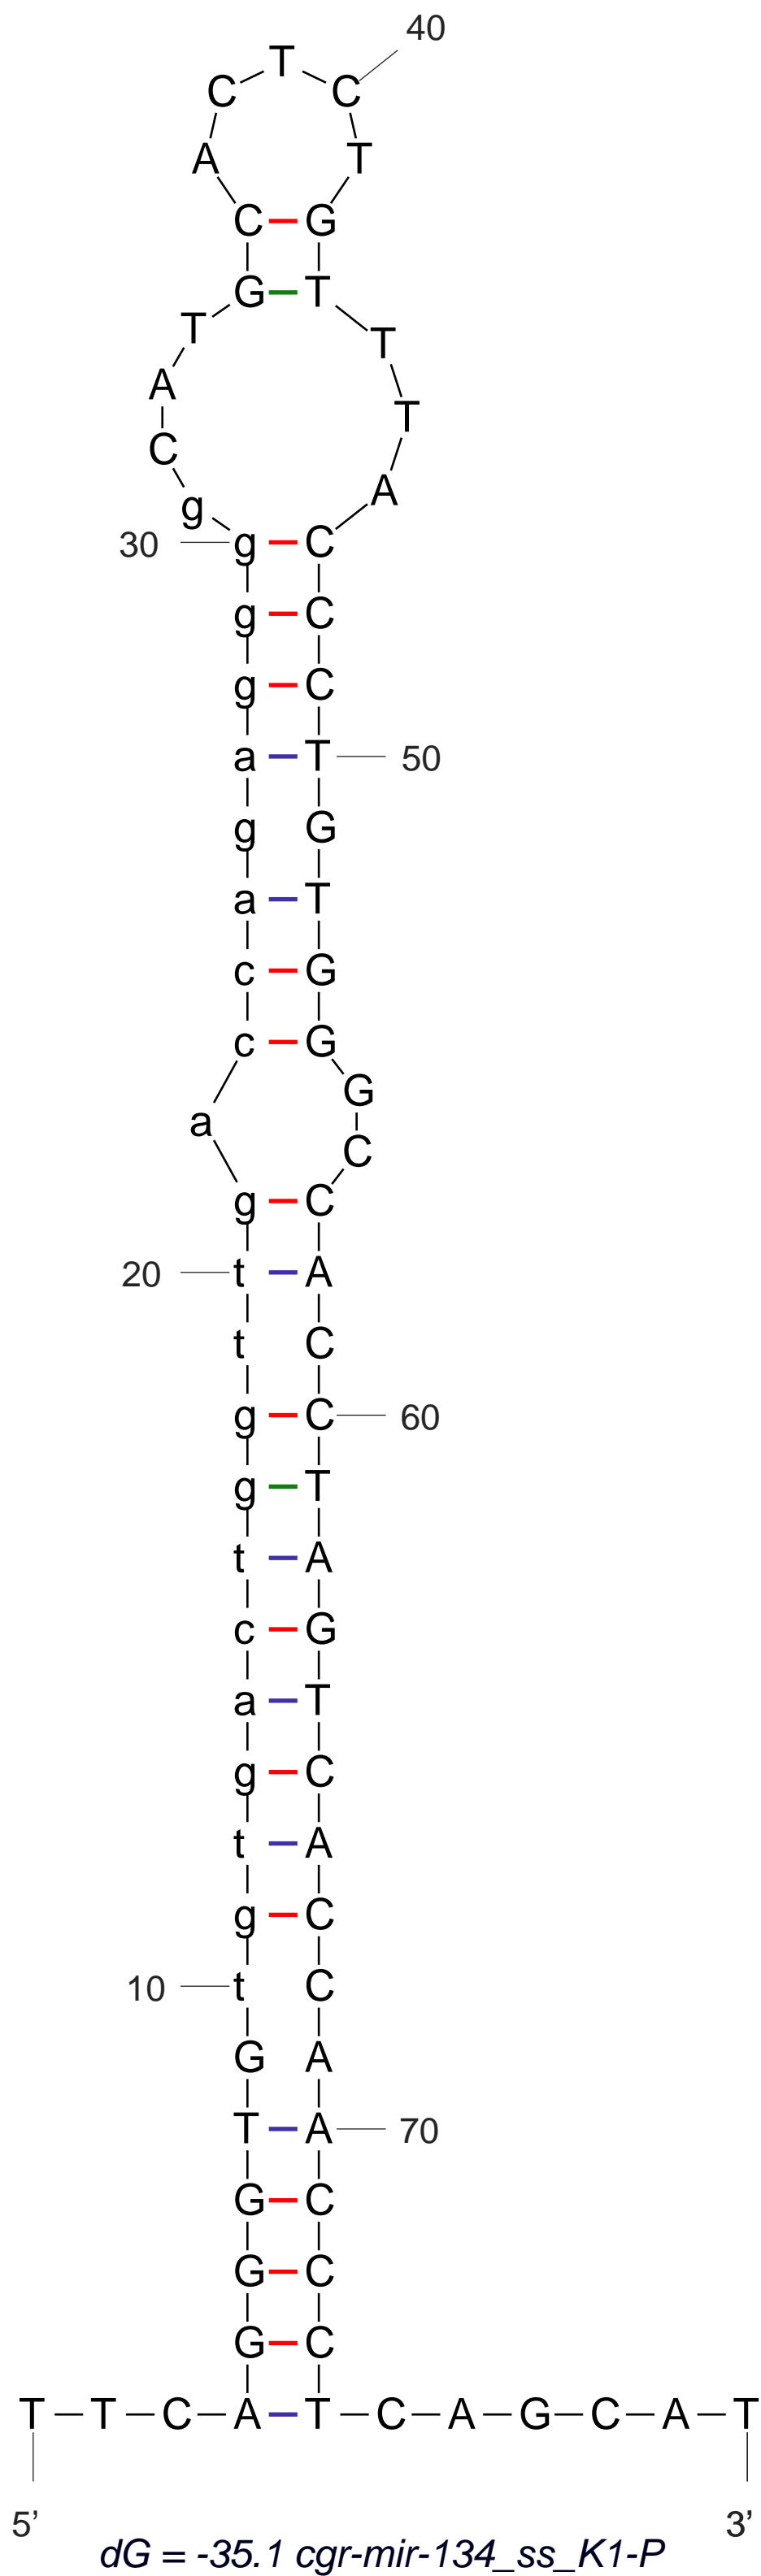

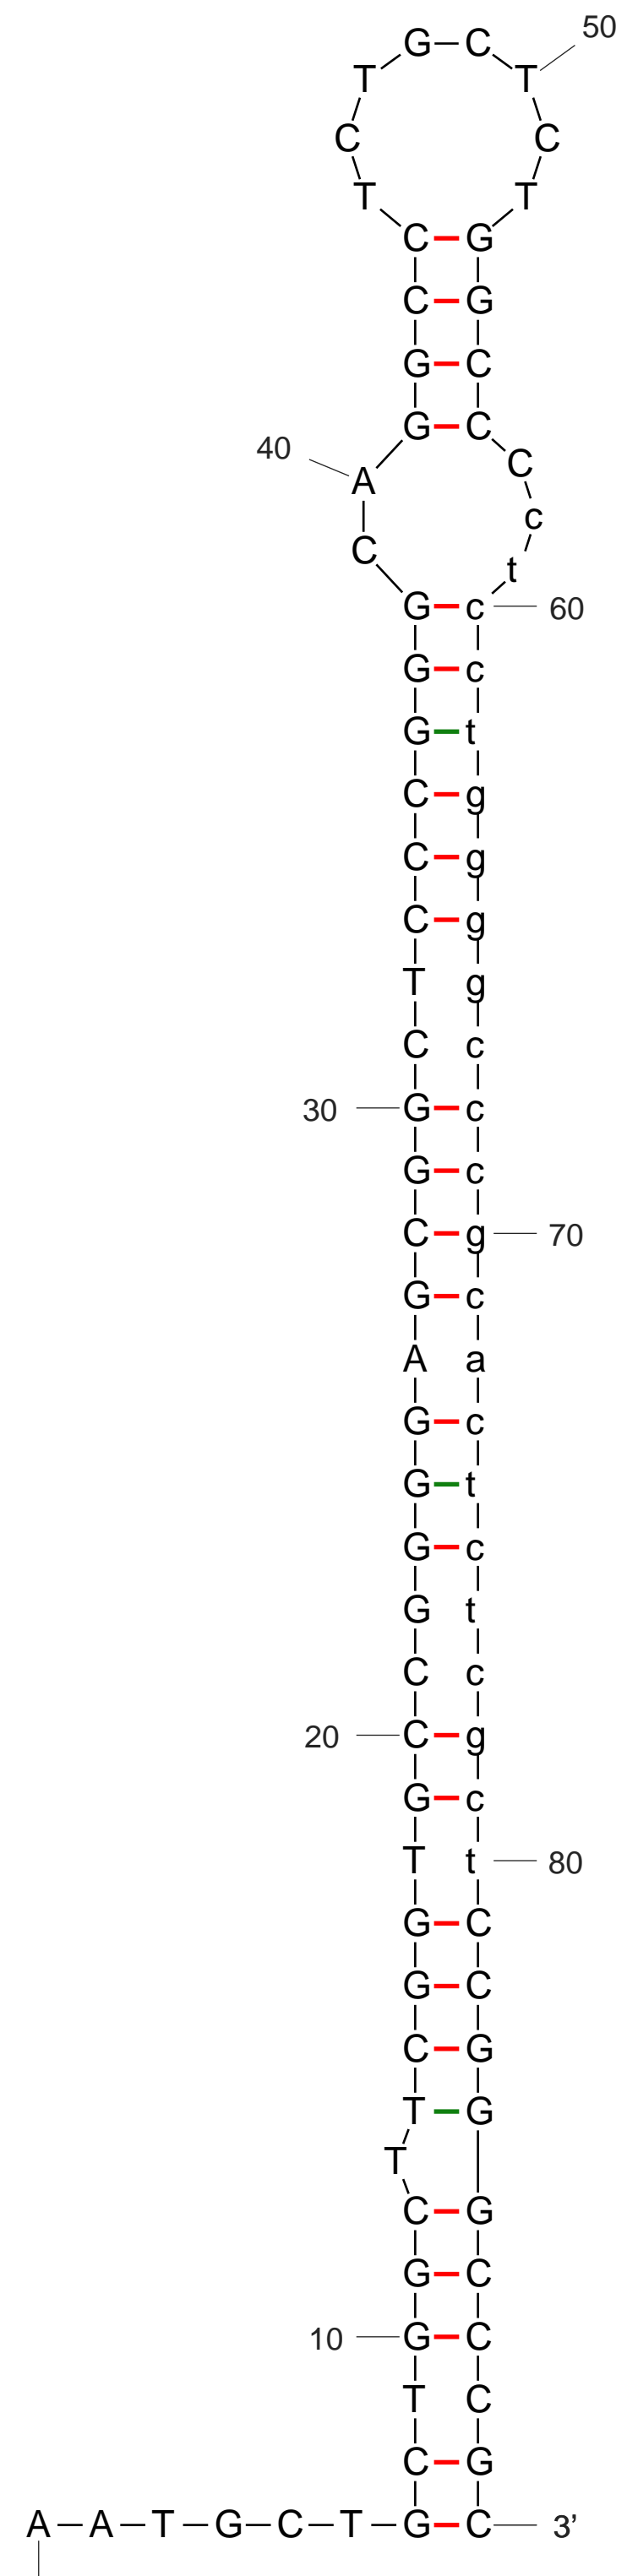

5'  
dG = -49.4 cgr-mir-1343\_ss\_K1-P

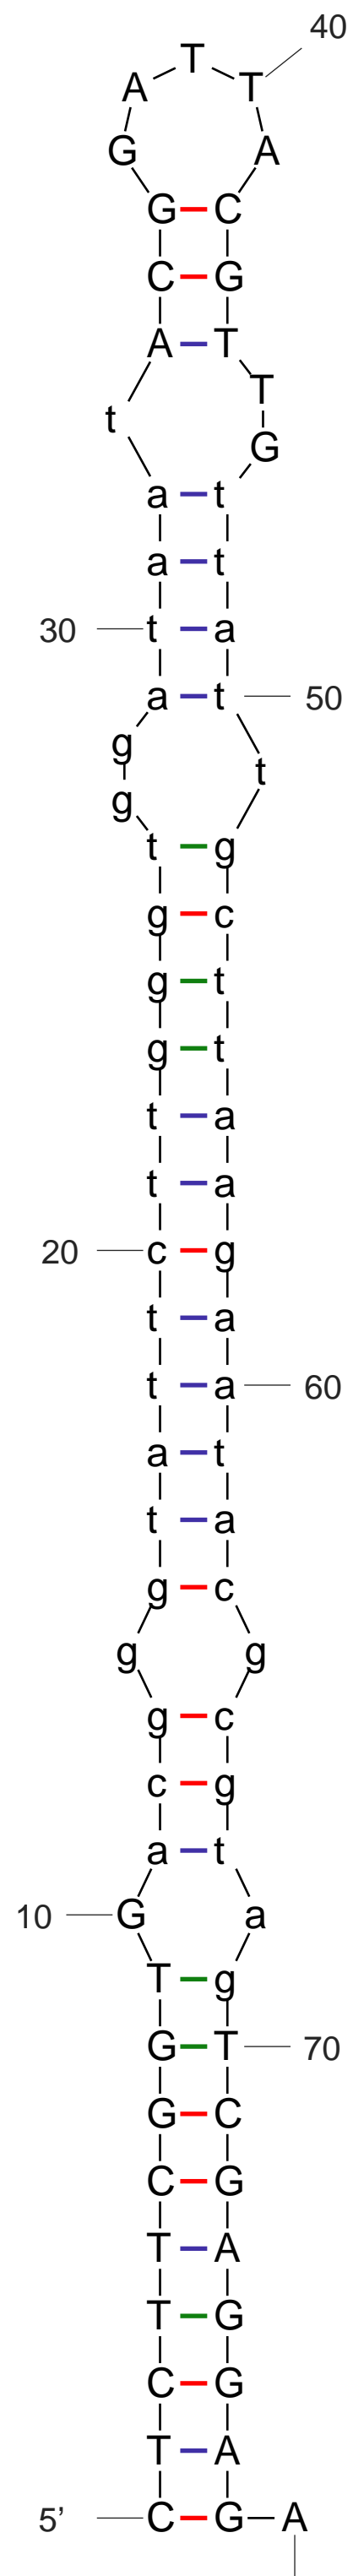

*dG = -14.14 cgr-mir-137\_db\_K1-P*

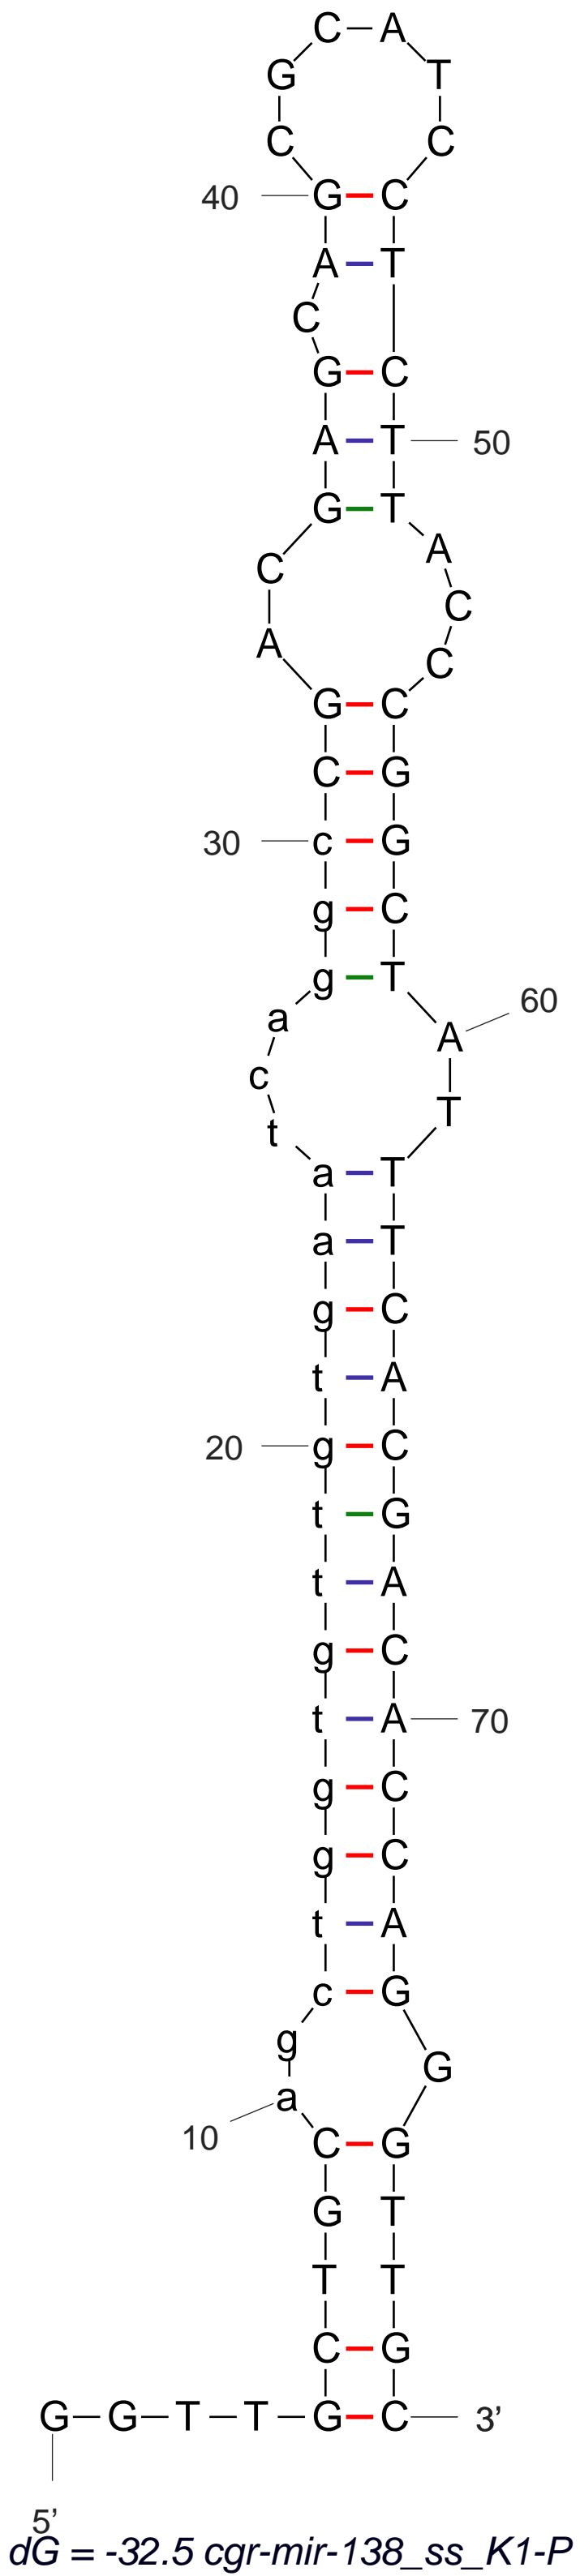



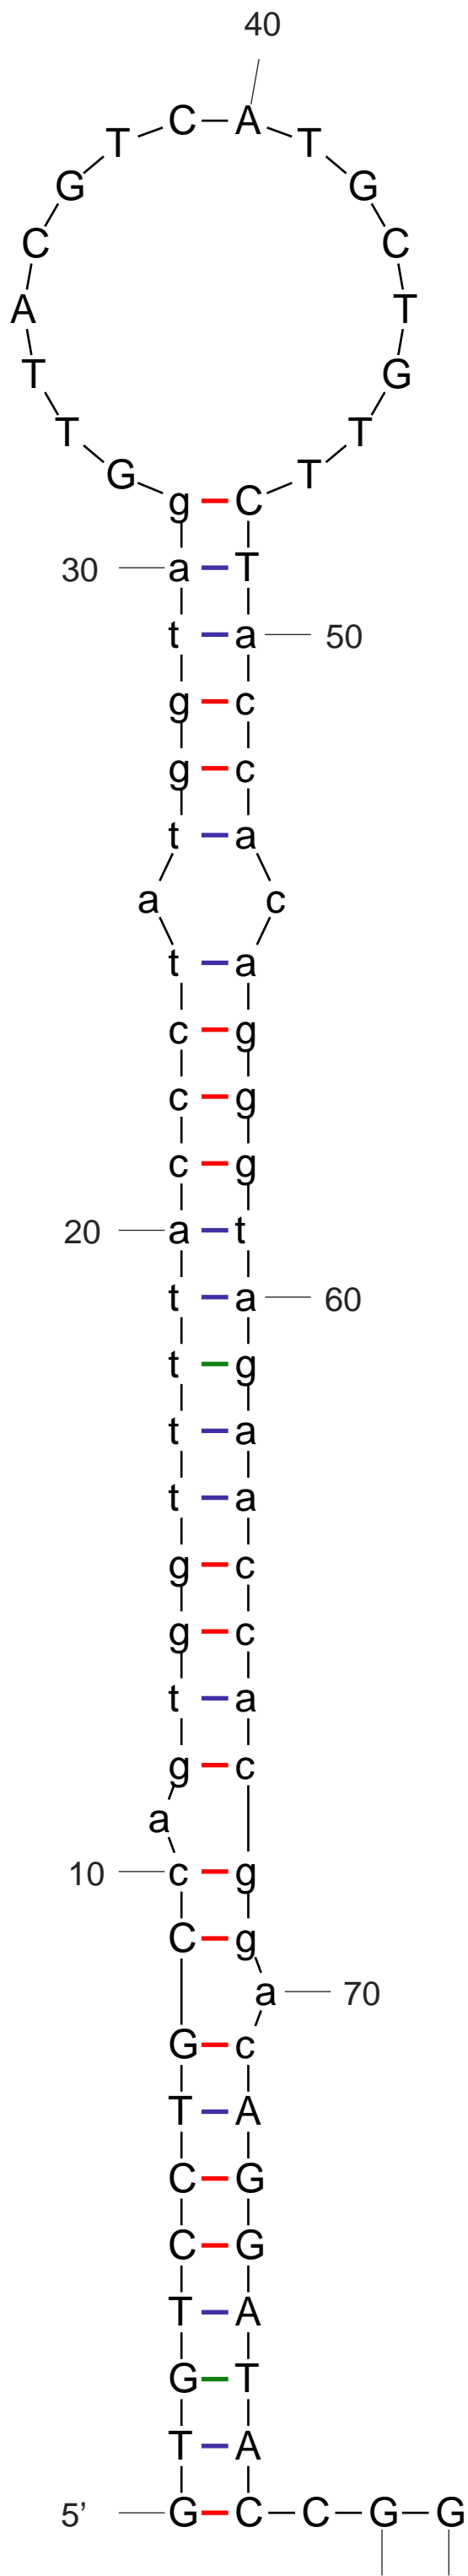

$dG = -19.37$  *cgr-mir-140\_db\_K1-P*

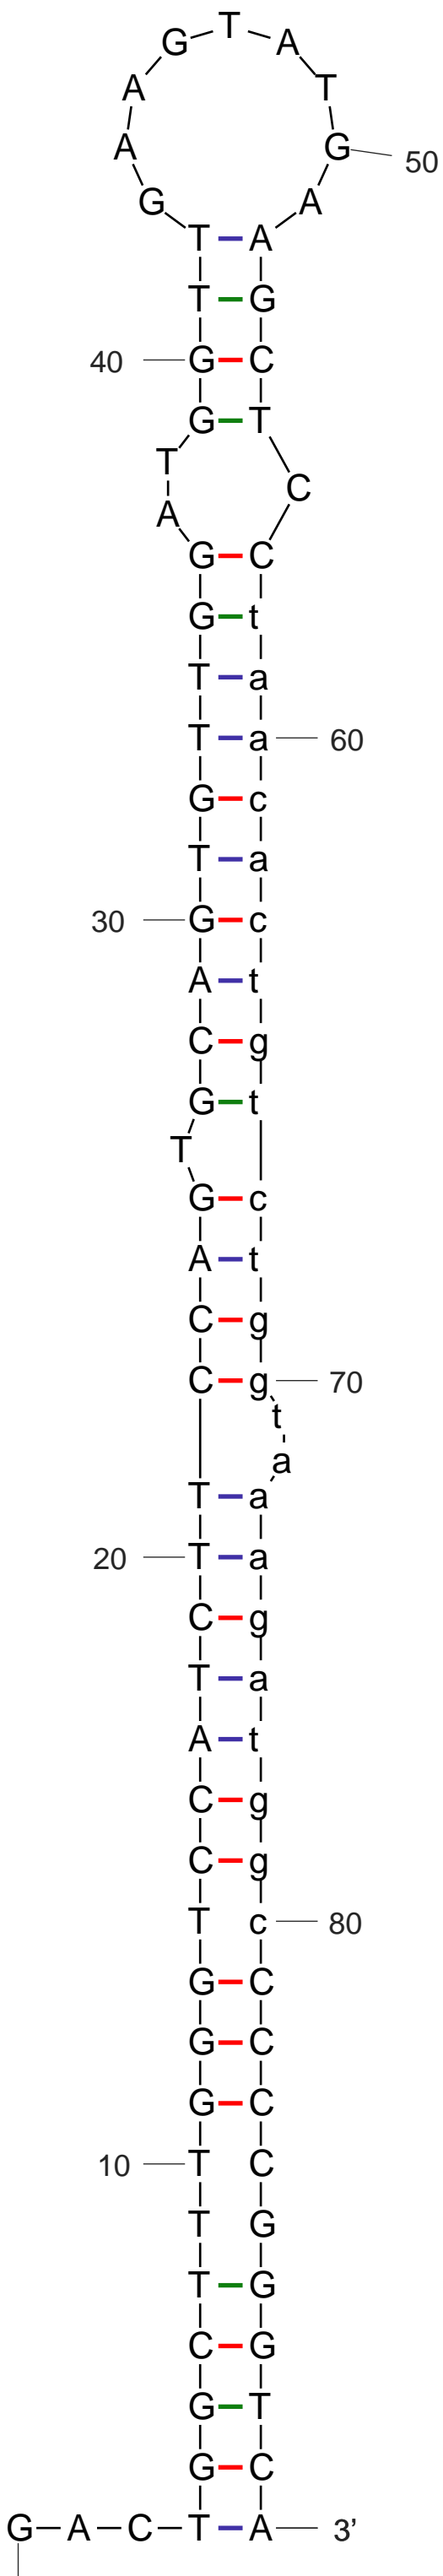

5' dG = -41.9 cgr-mir-141\_ss\_K1-P 3'



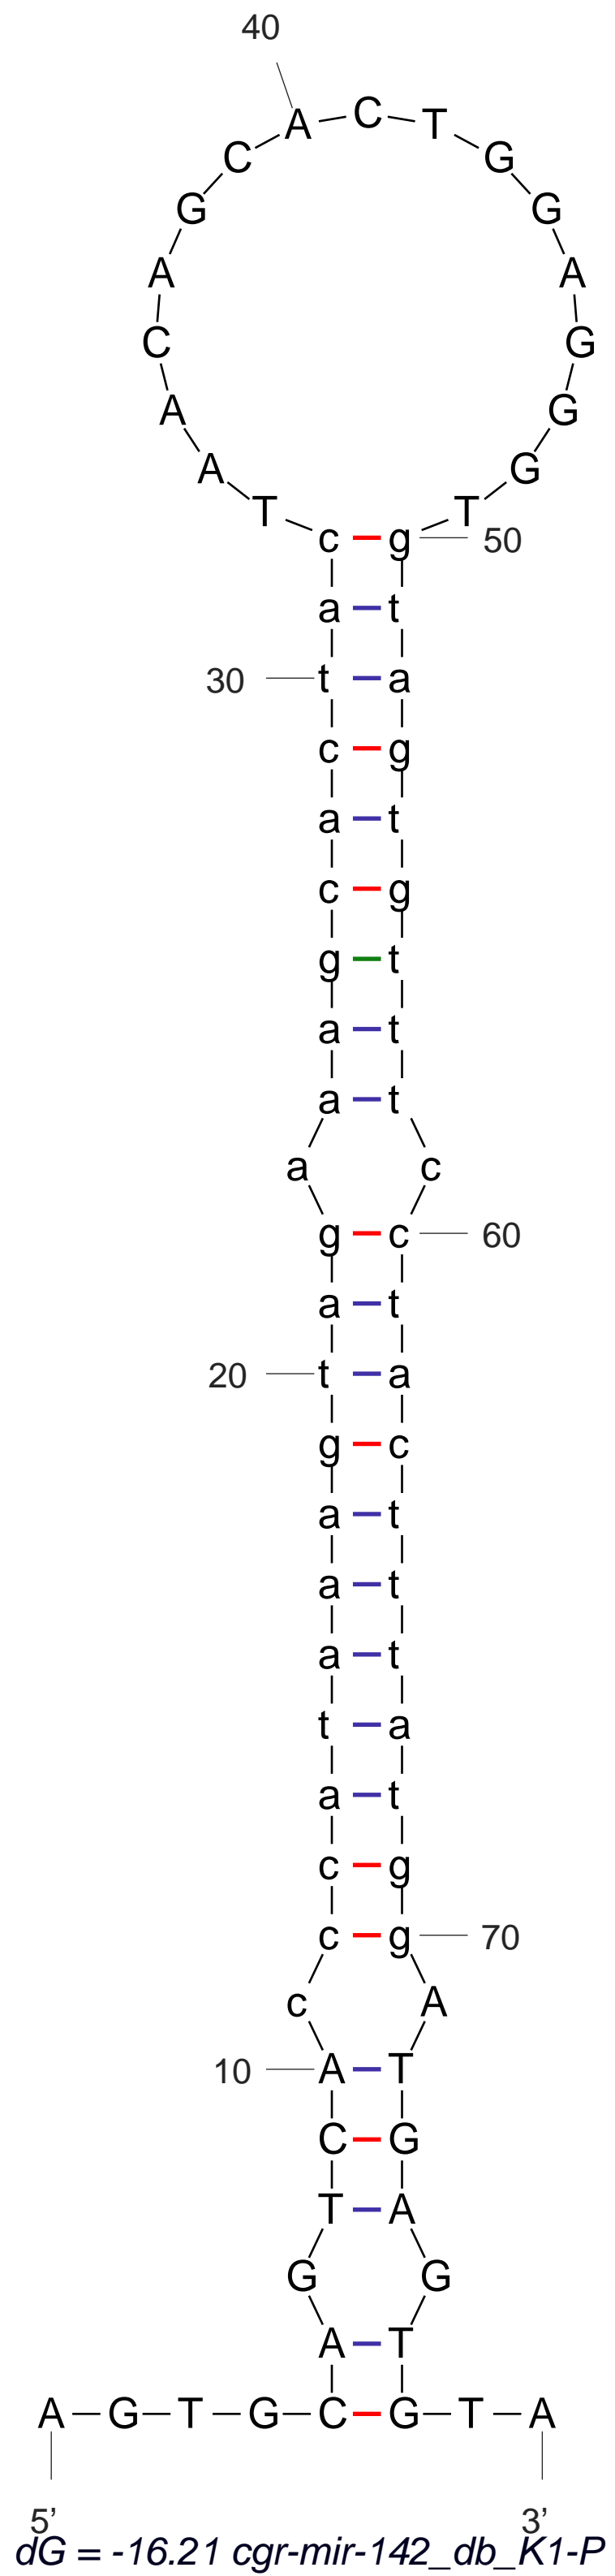

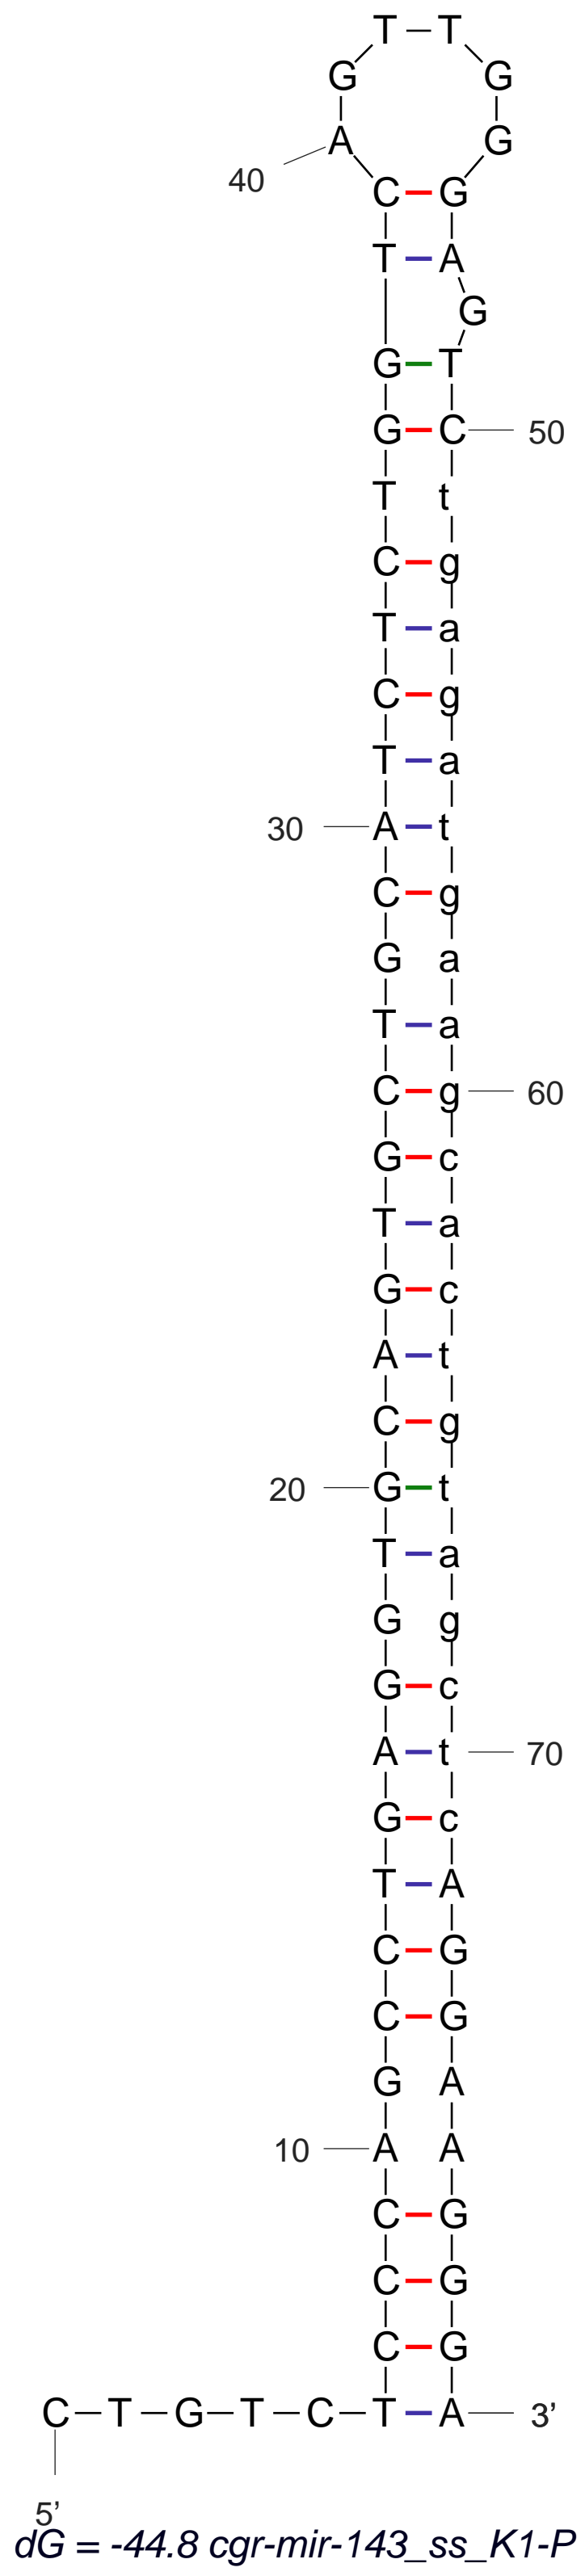

$dG = -44.8$  *cgr-mir-143\_ss\_K1-P*

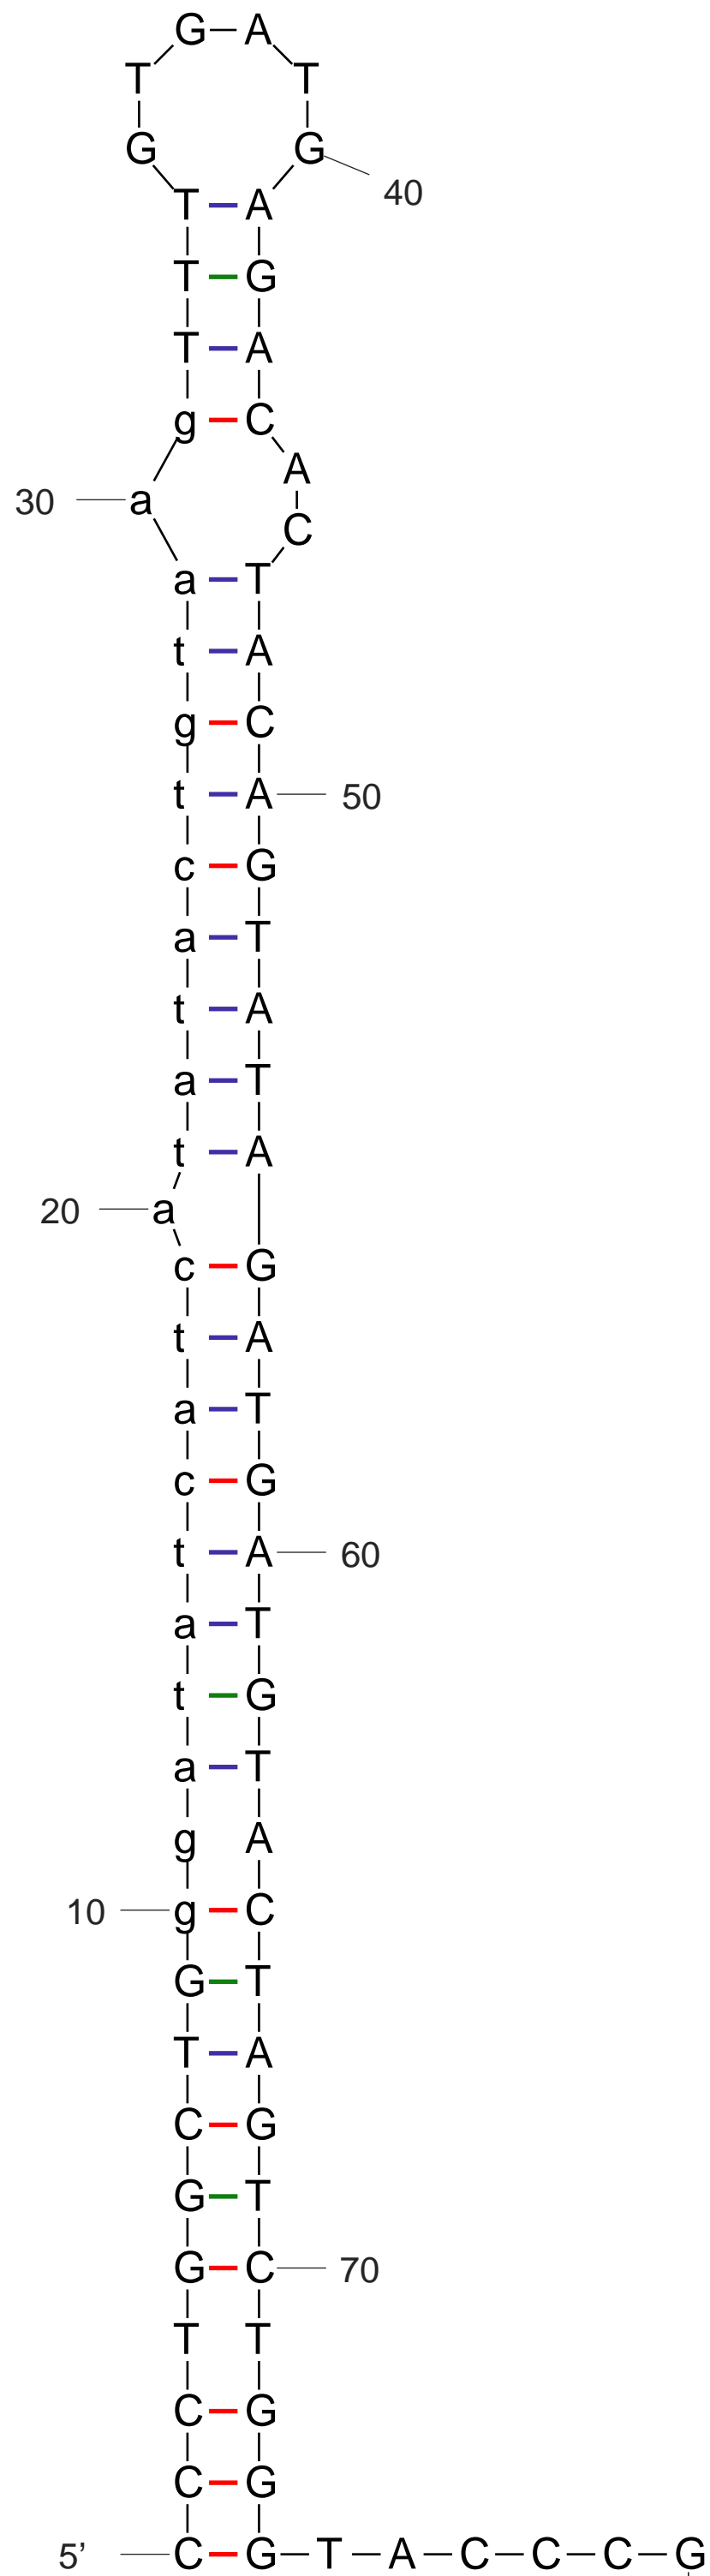

dG = -34.7 cgr-mir-144\_ss\_K1-P

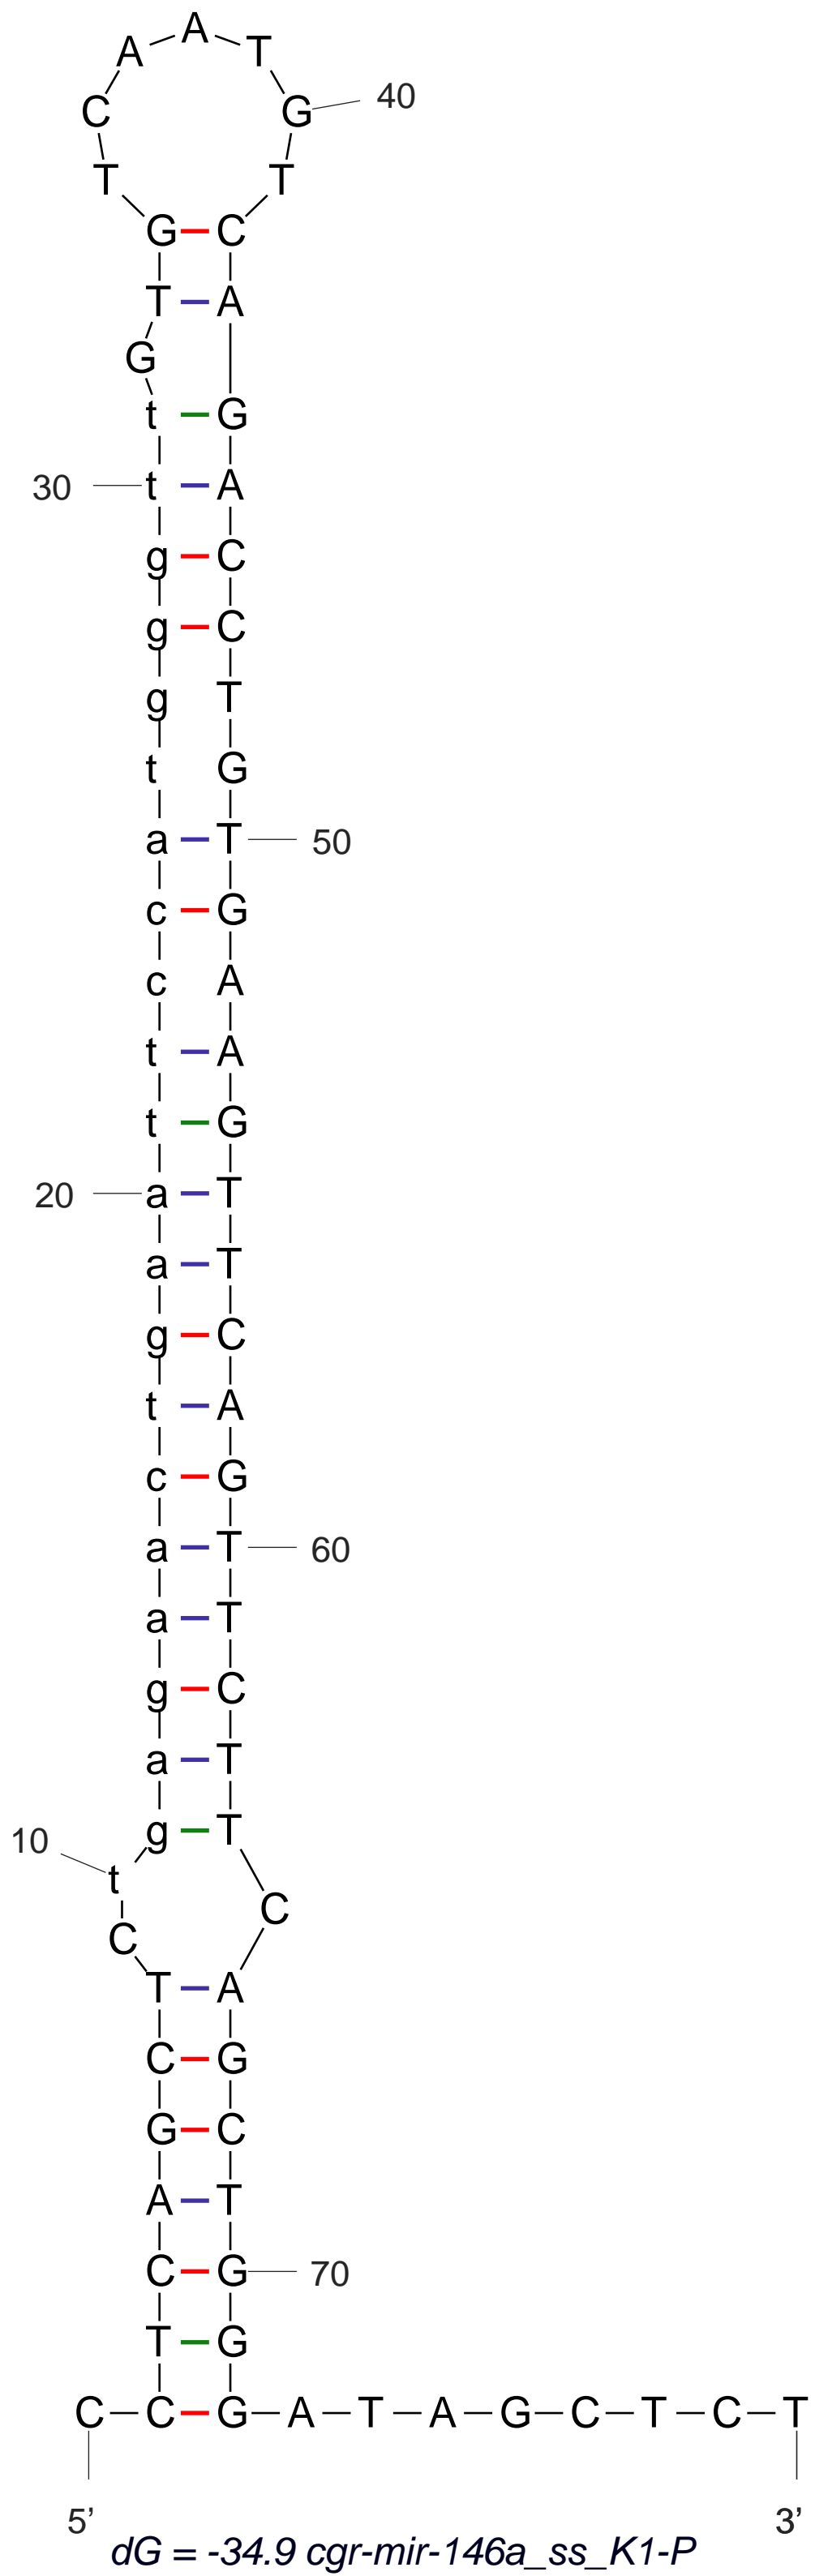

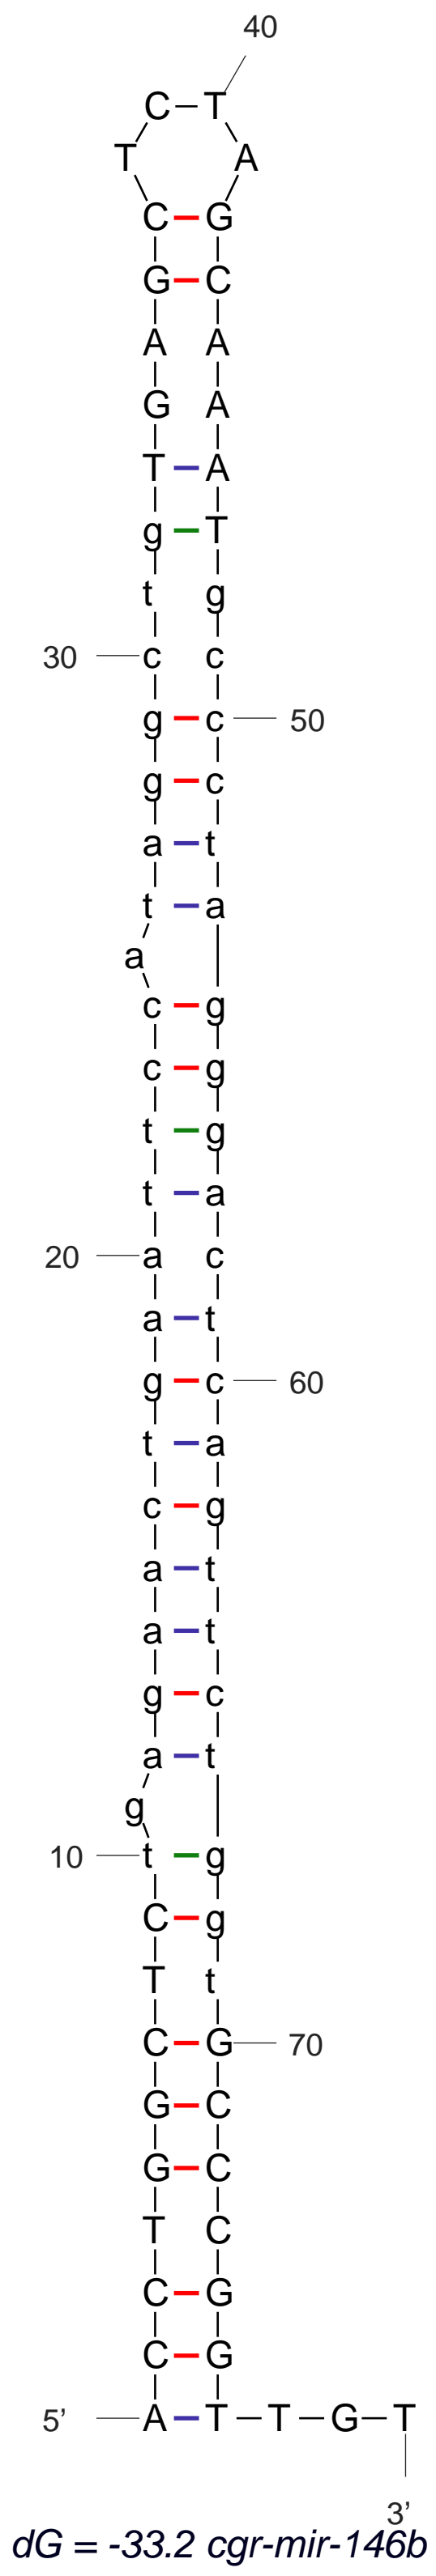

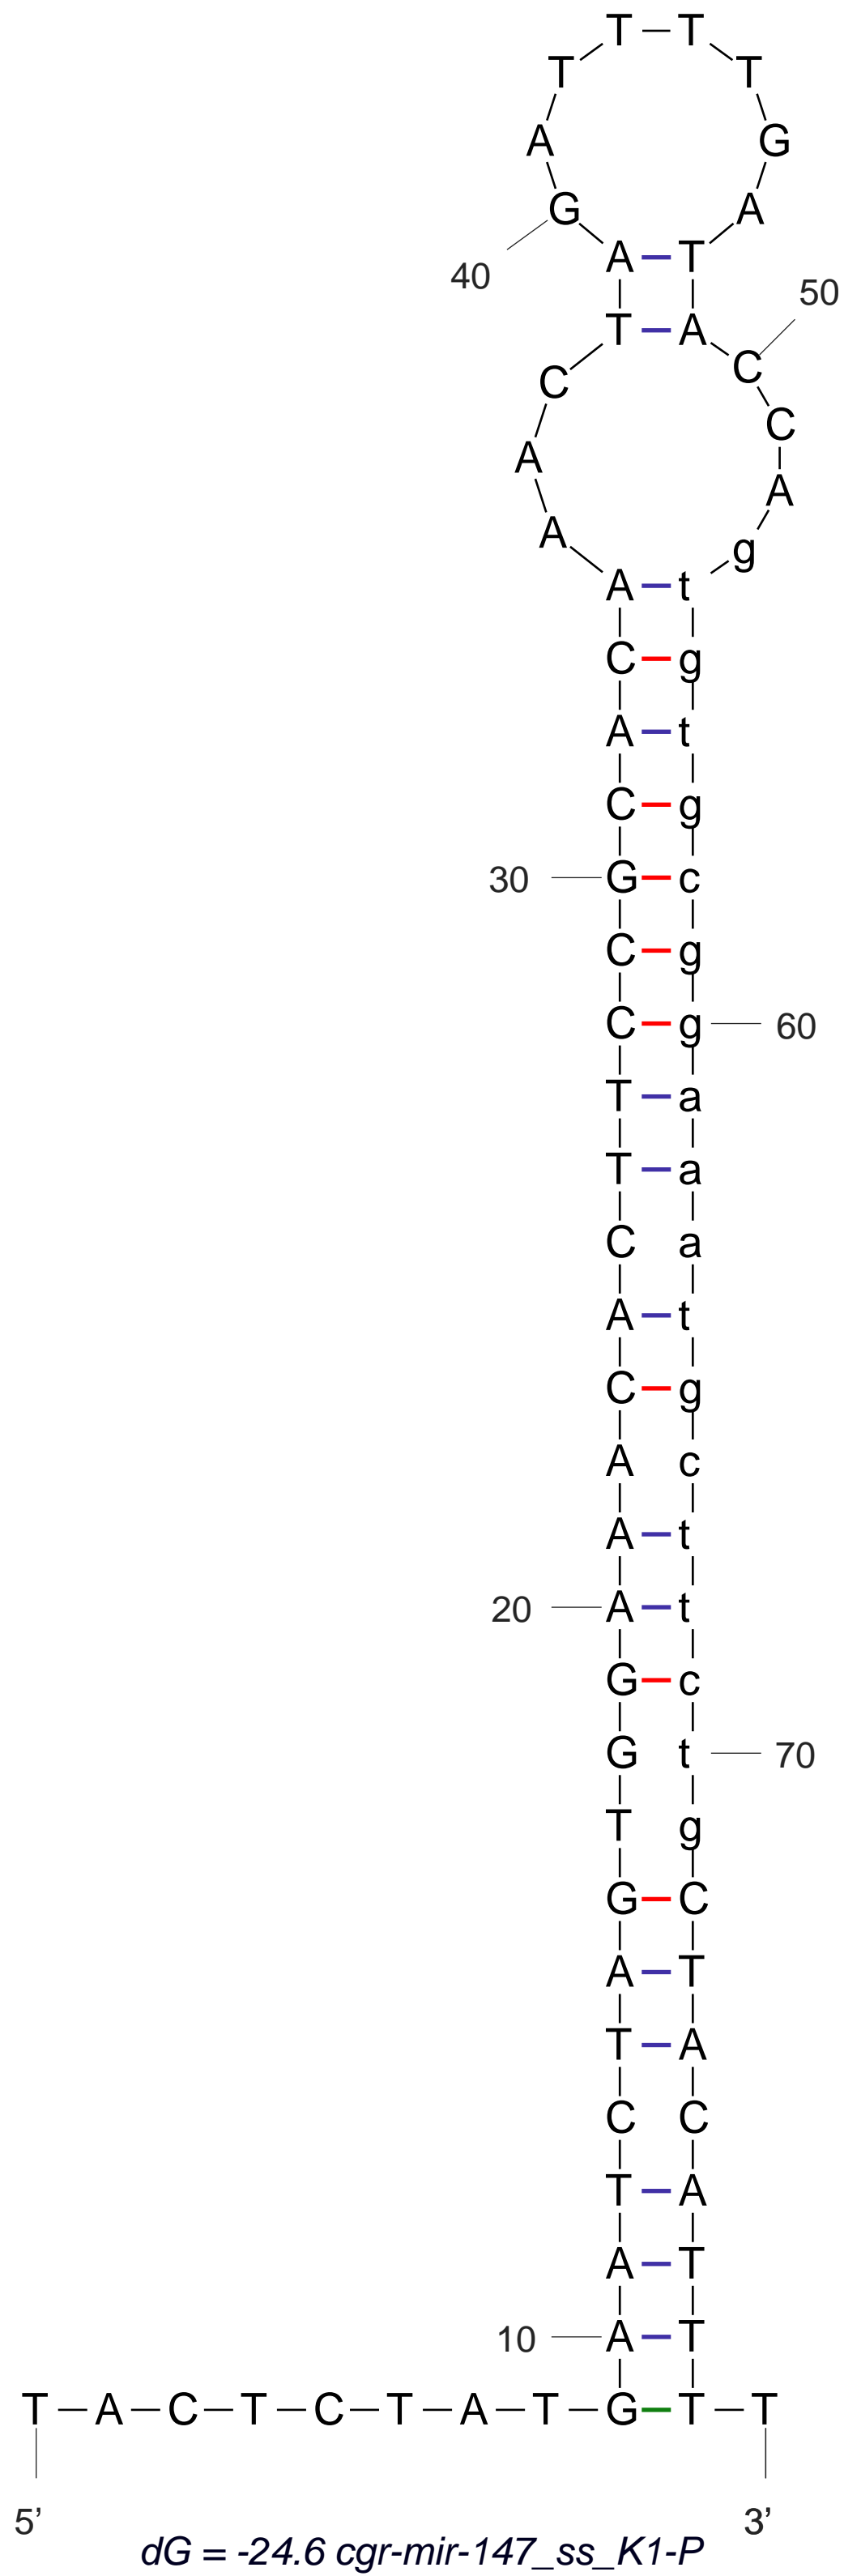

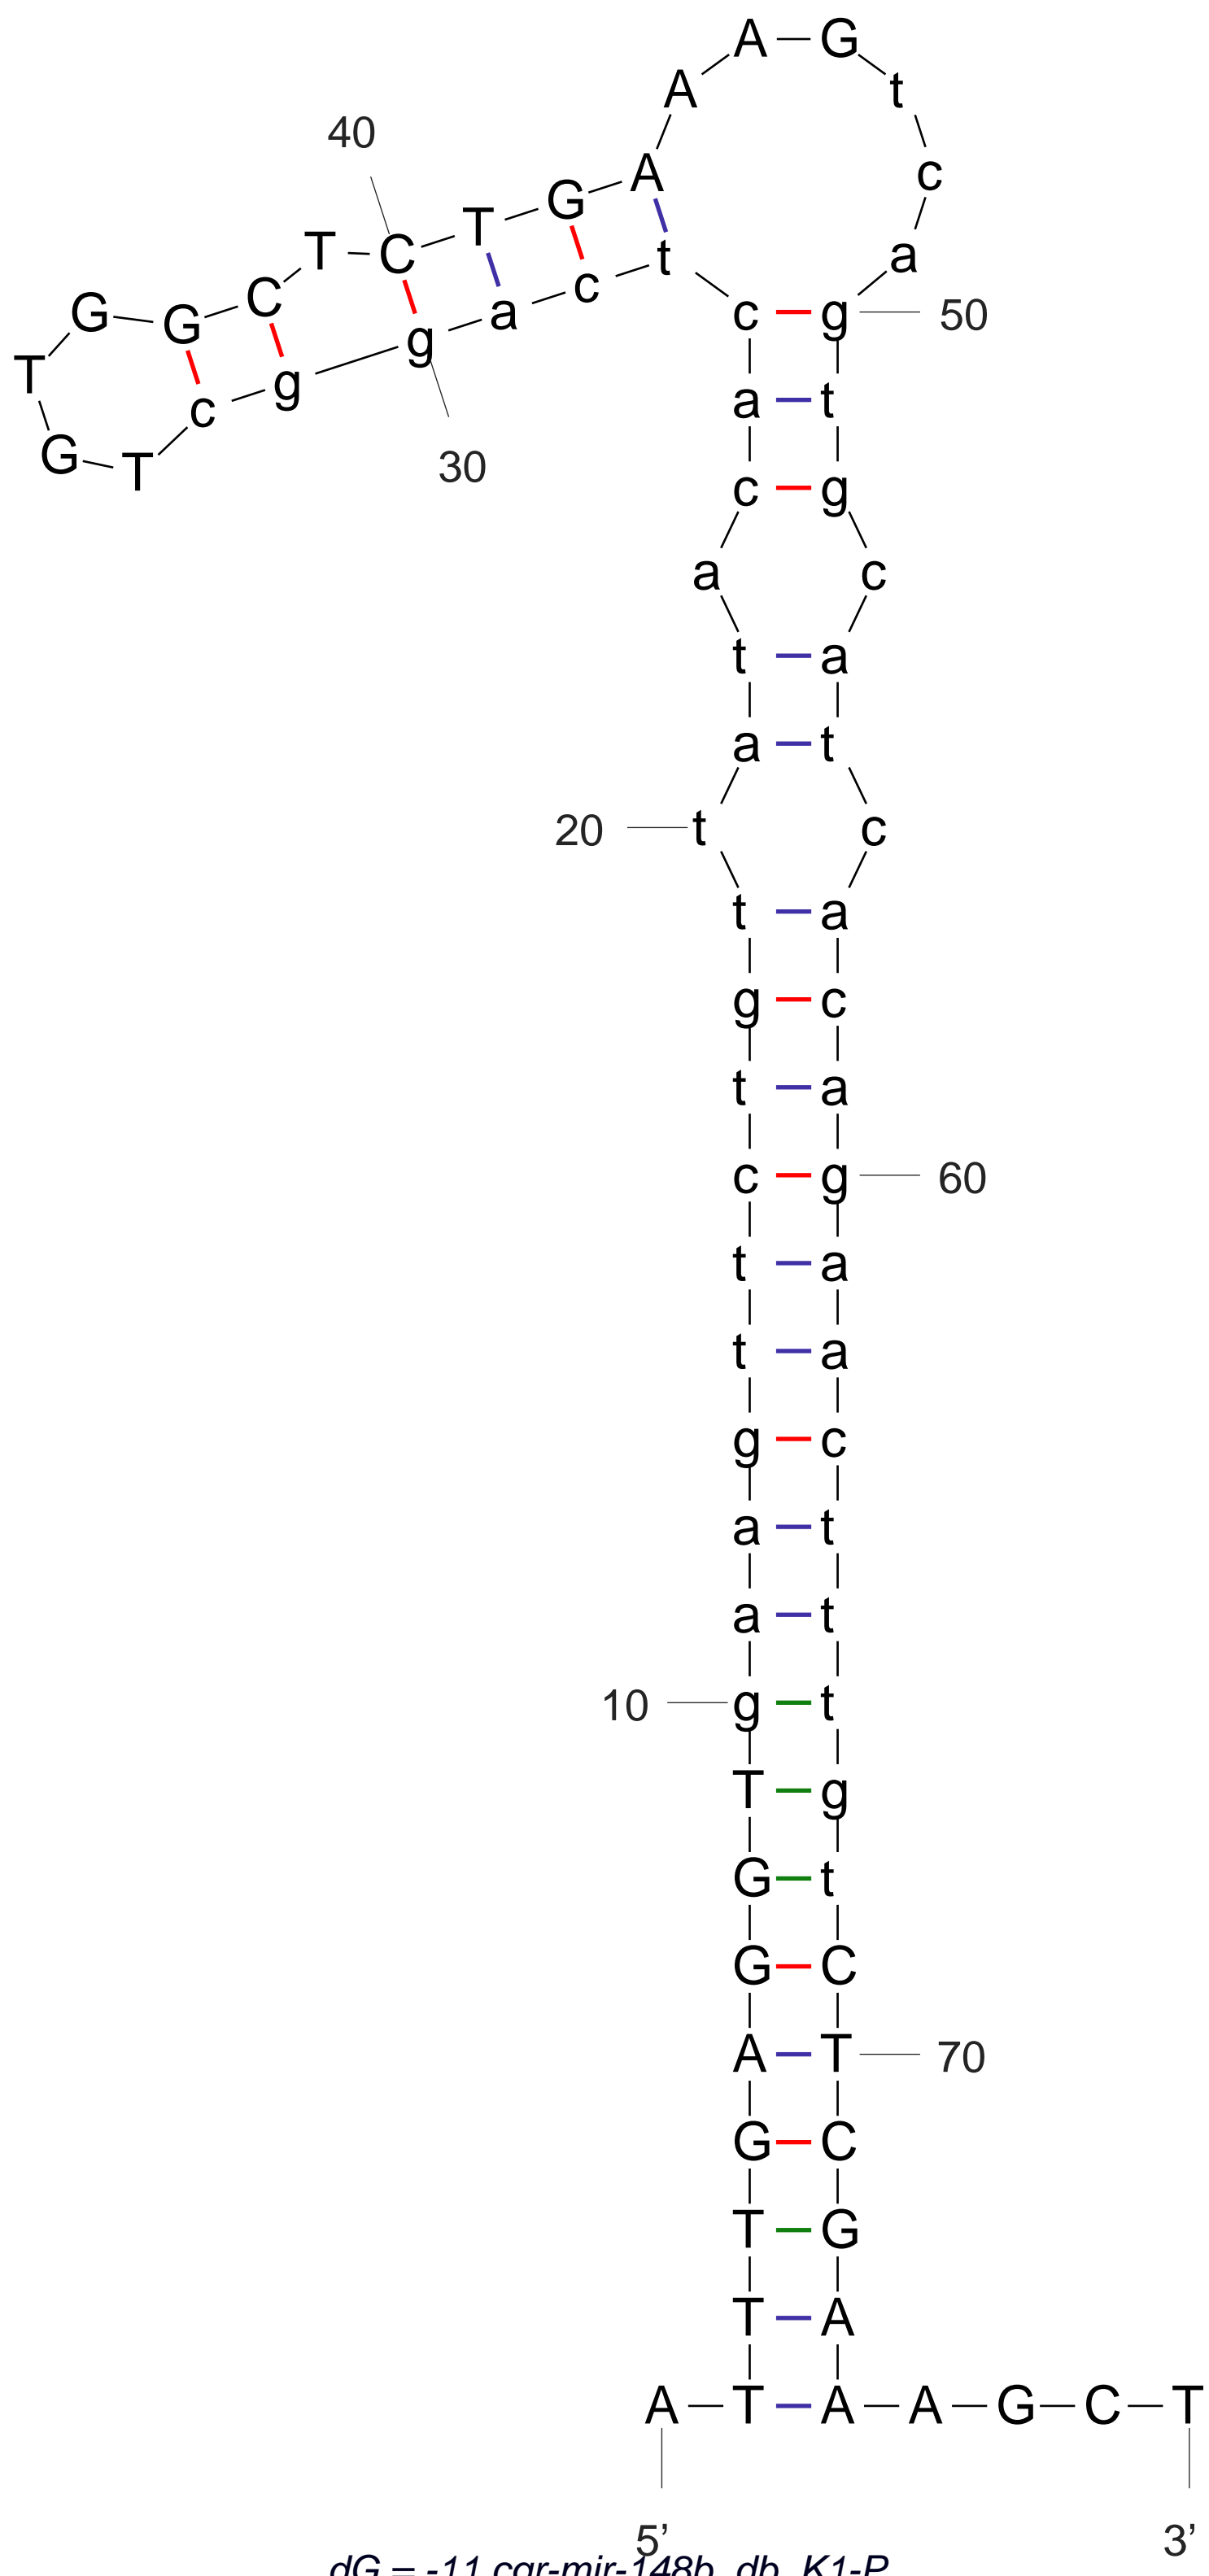

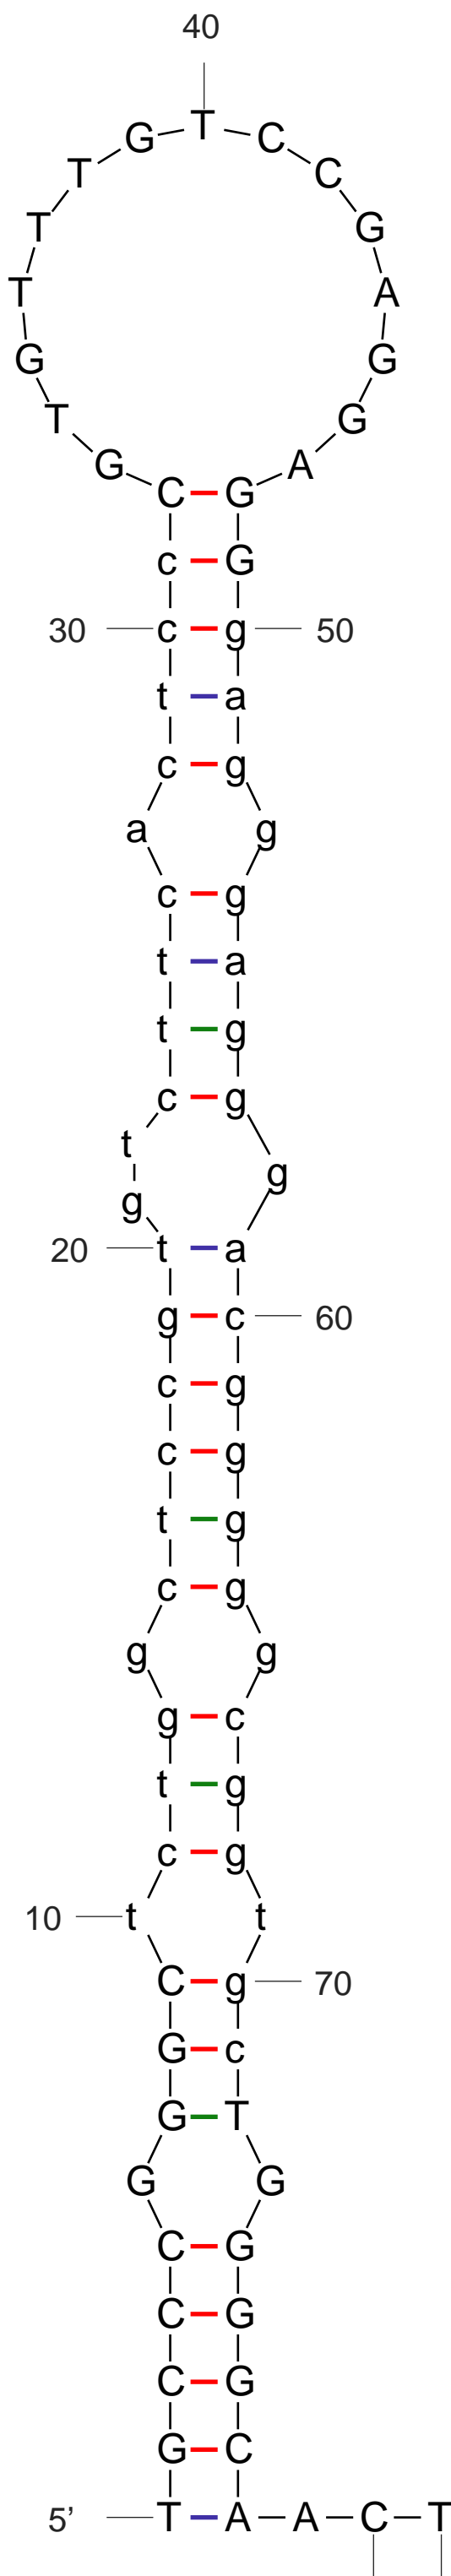

dG = -19.35 *cgr-mir-149\_db\_K1-P*



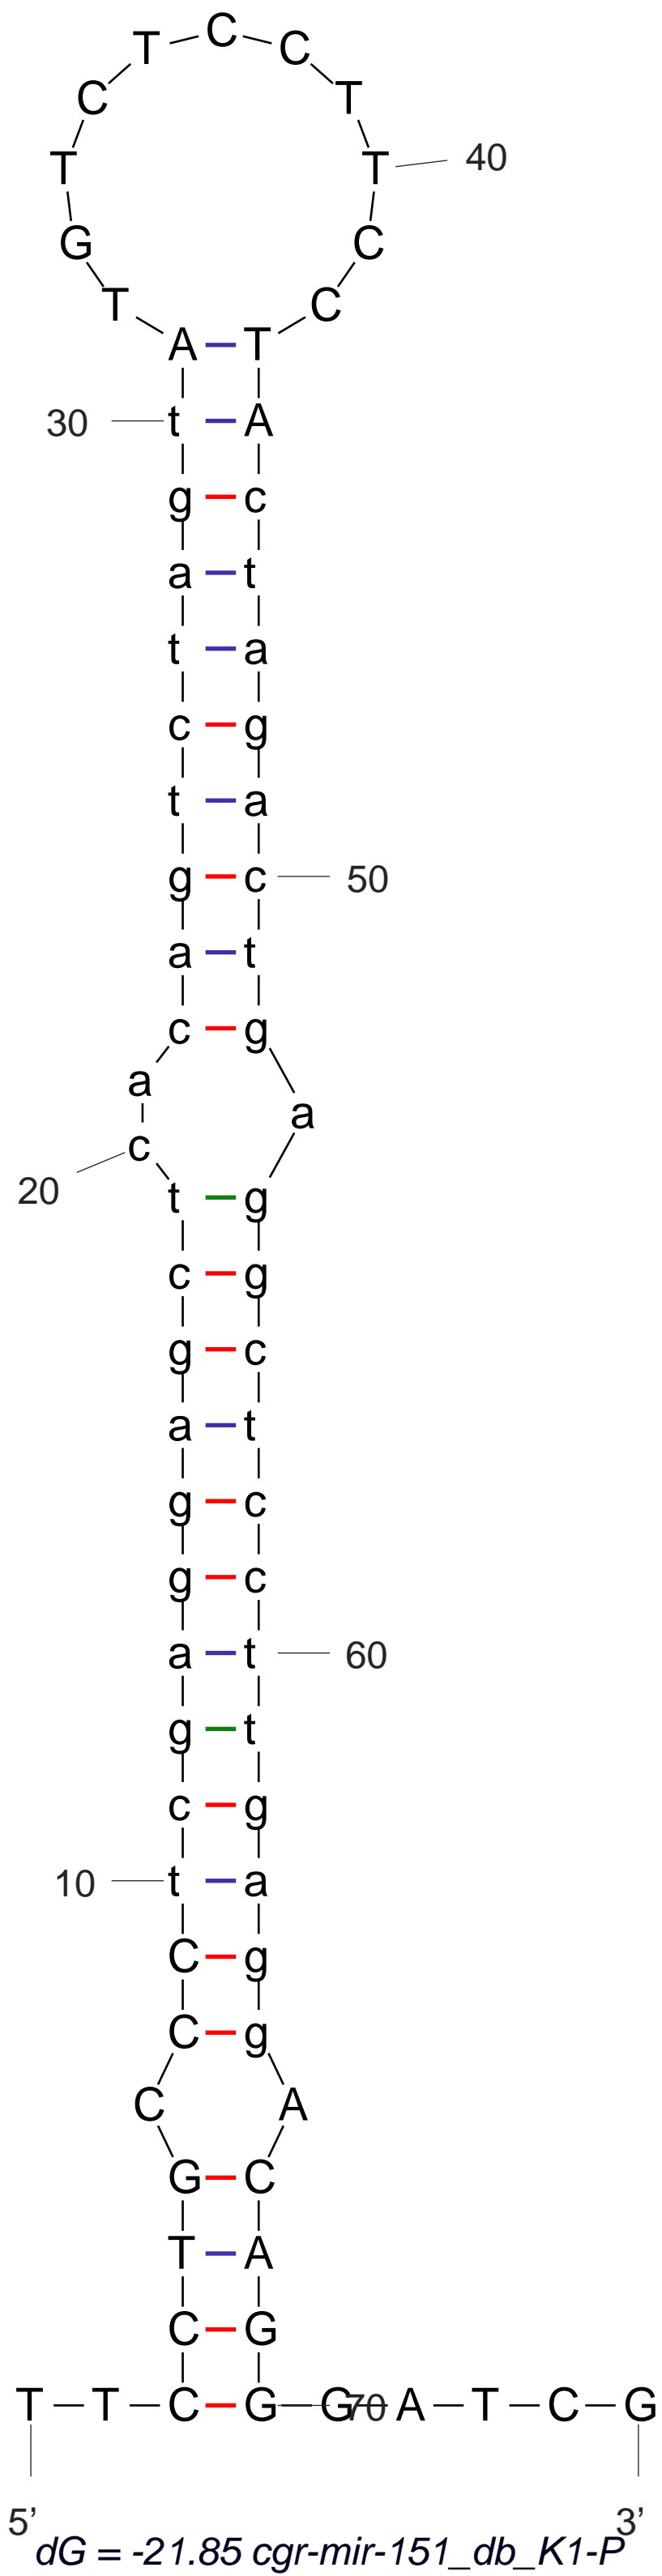

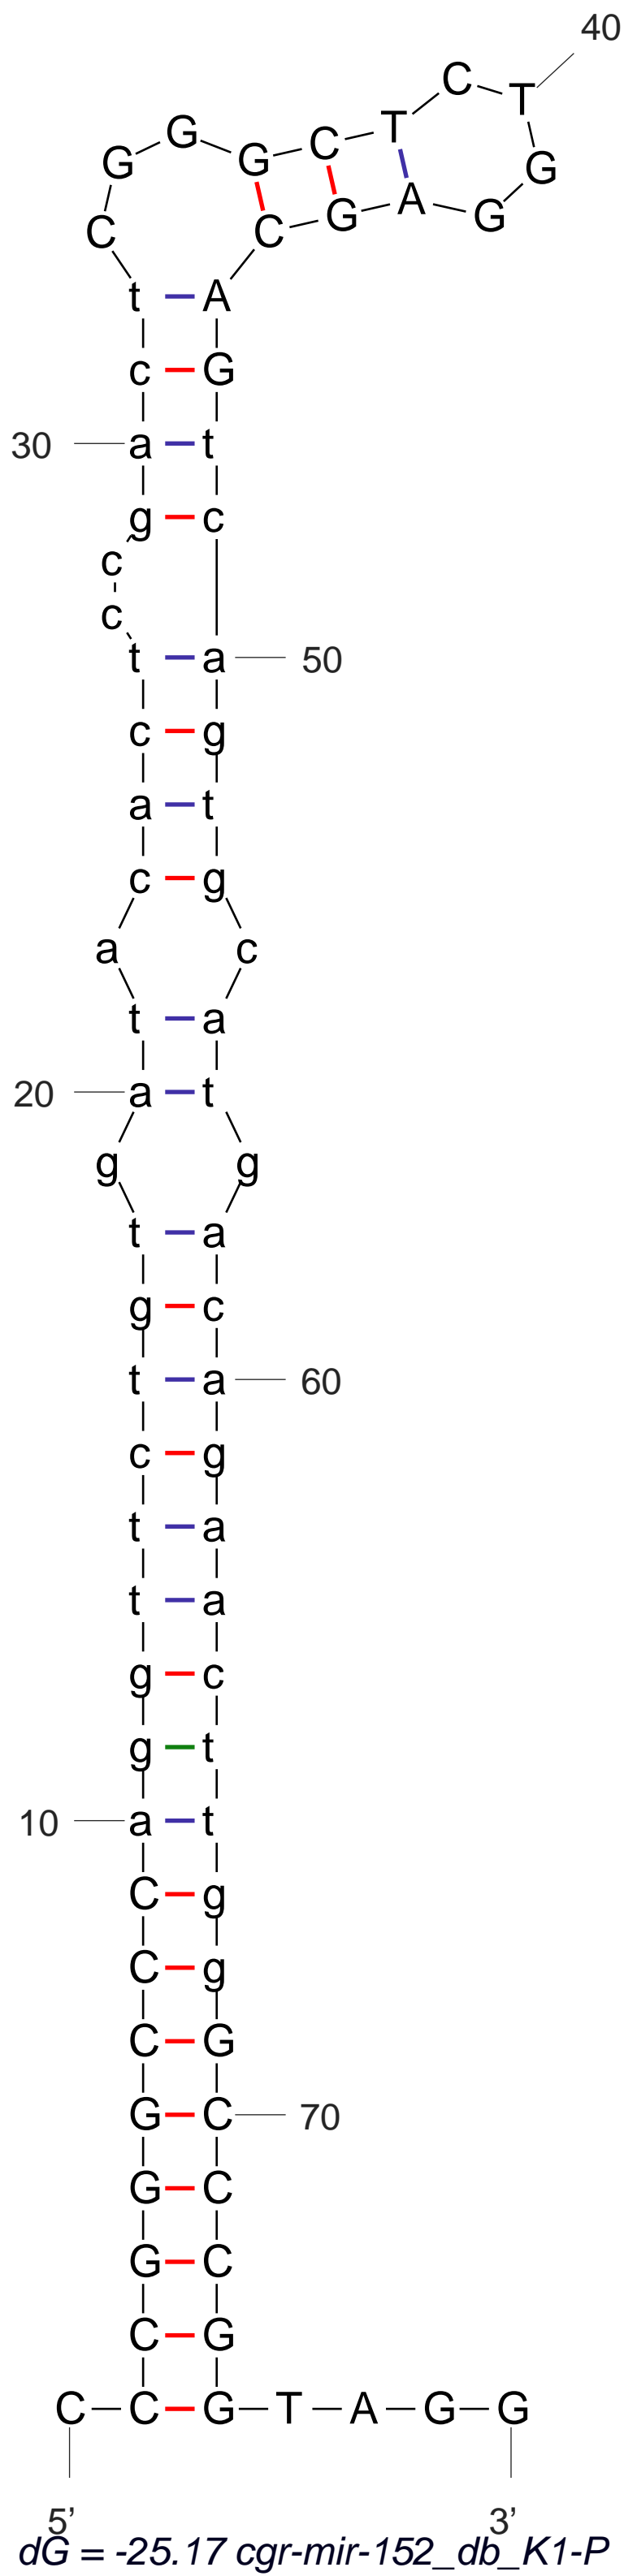

dG = -25.17 cgr-mir-152\_db\_K1-P

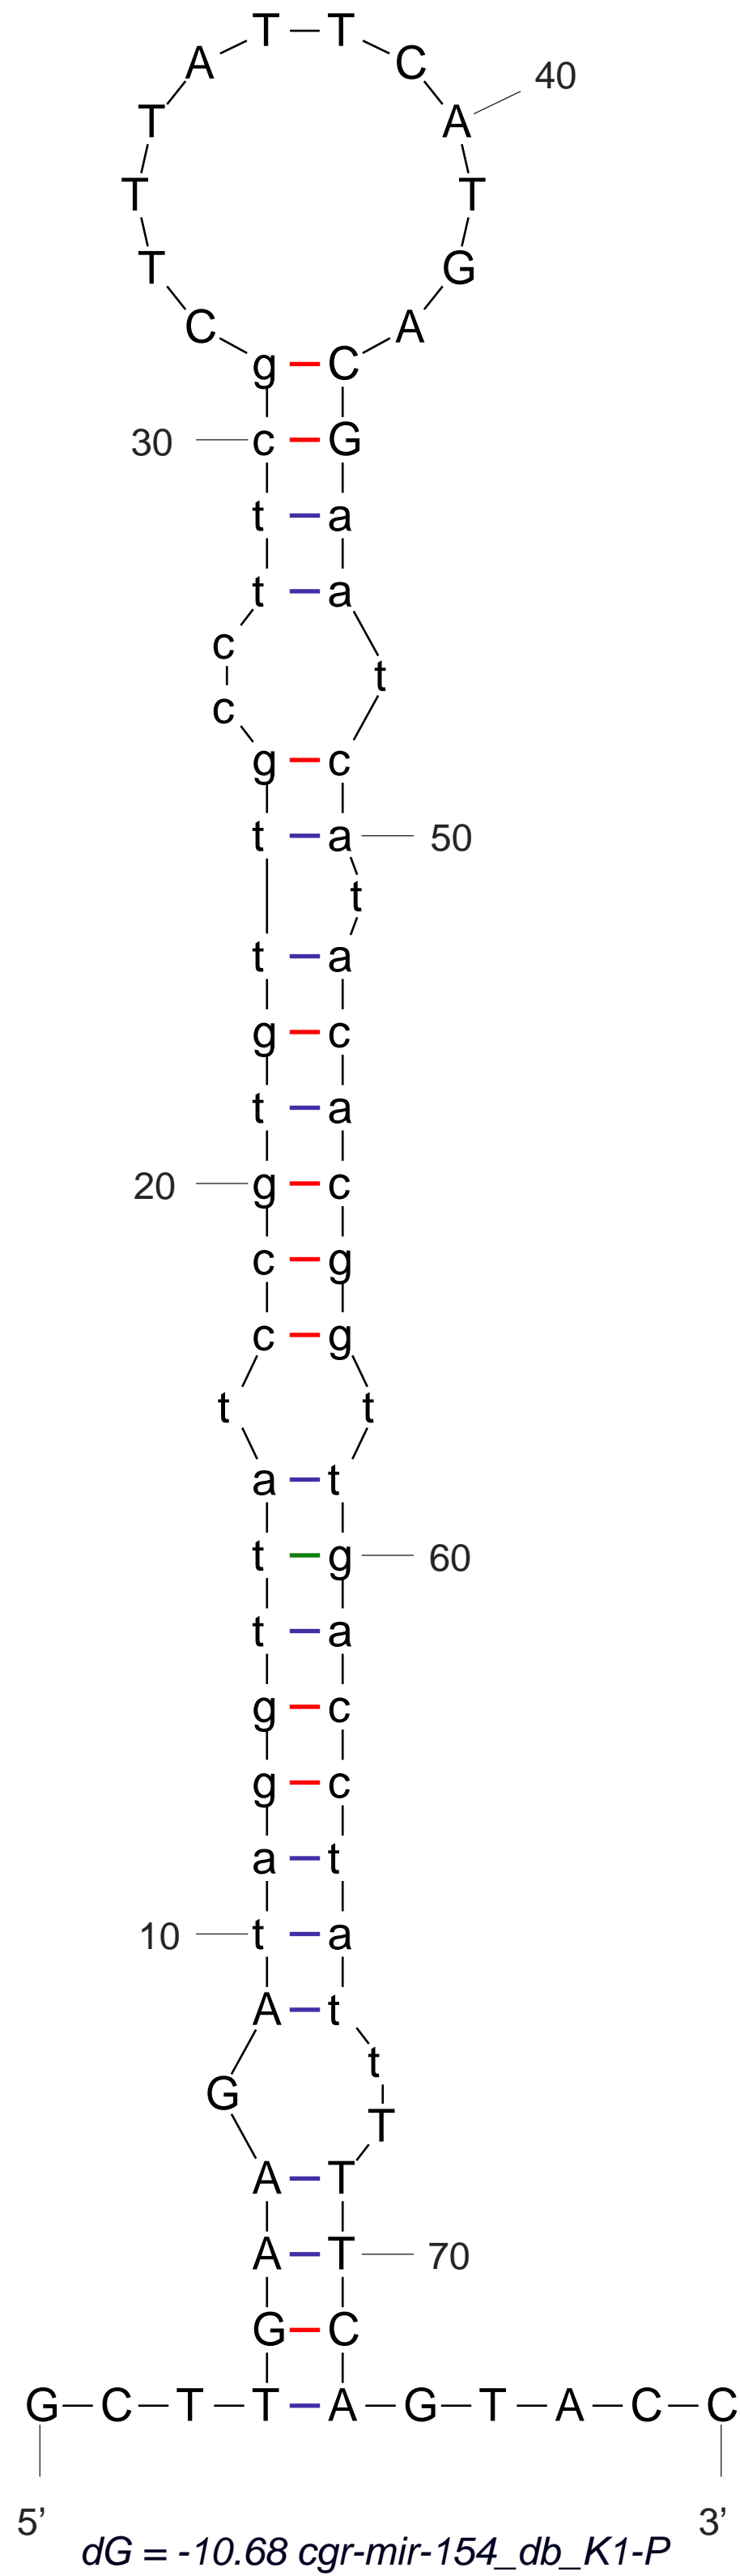

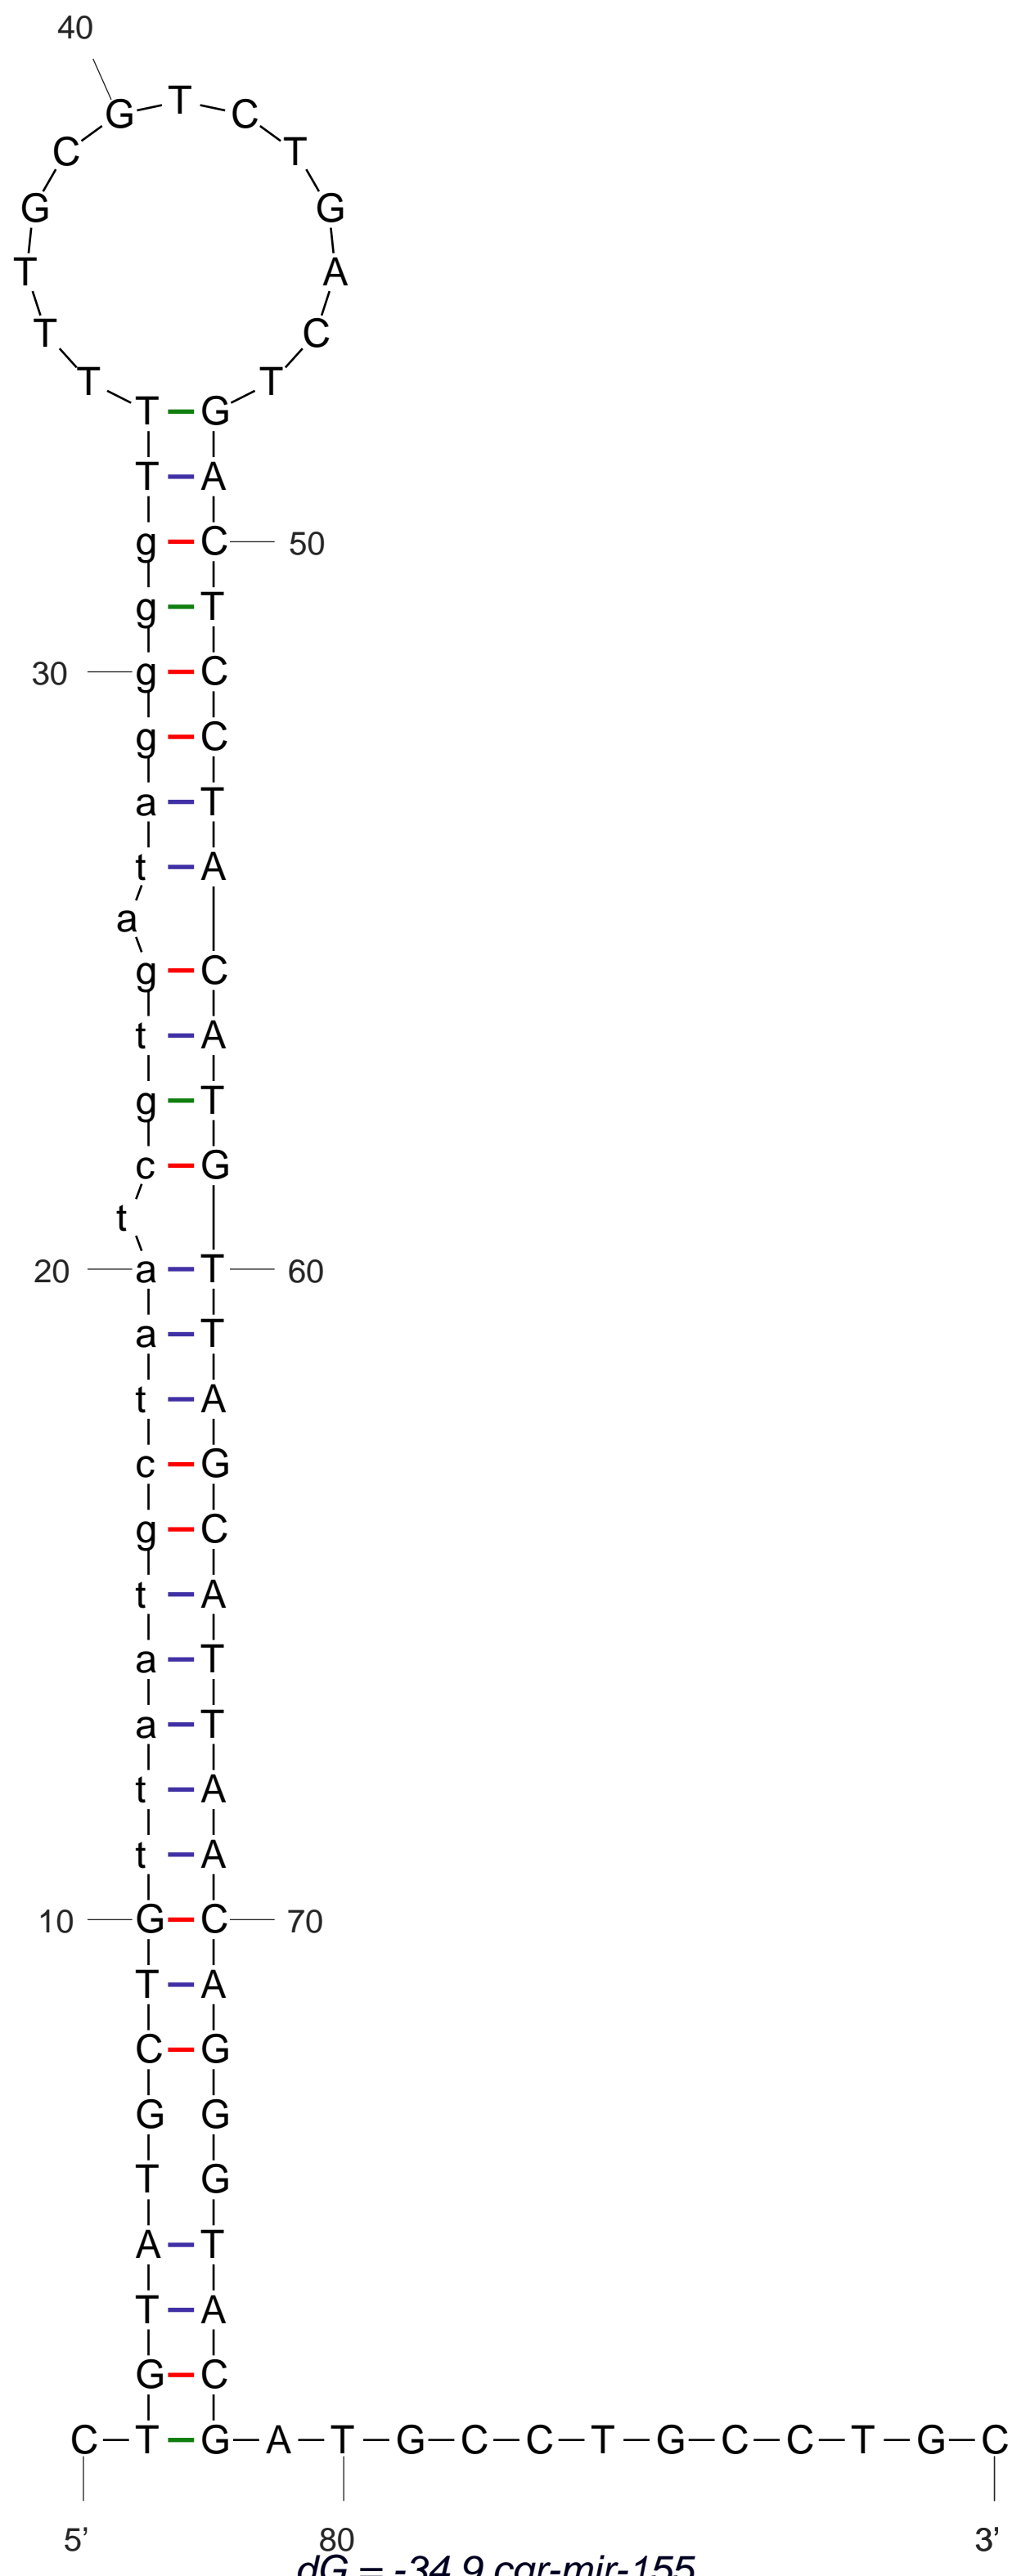

$dG = -34.9$  *cgr-mir-155*

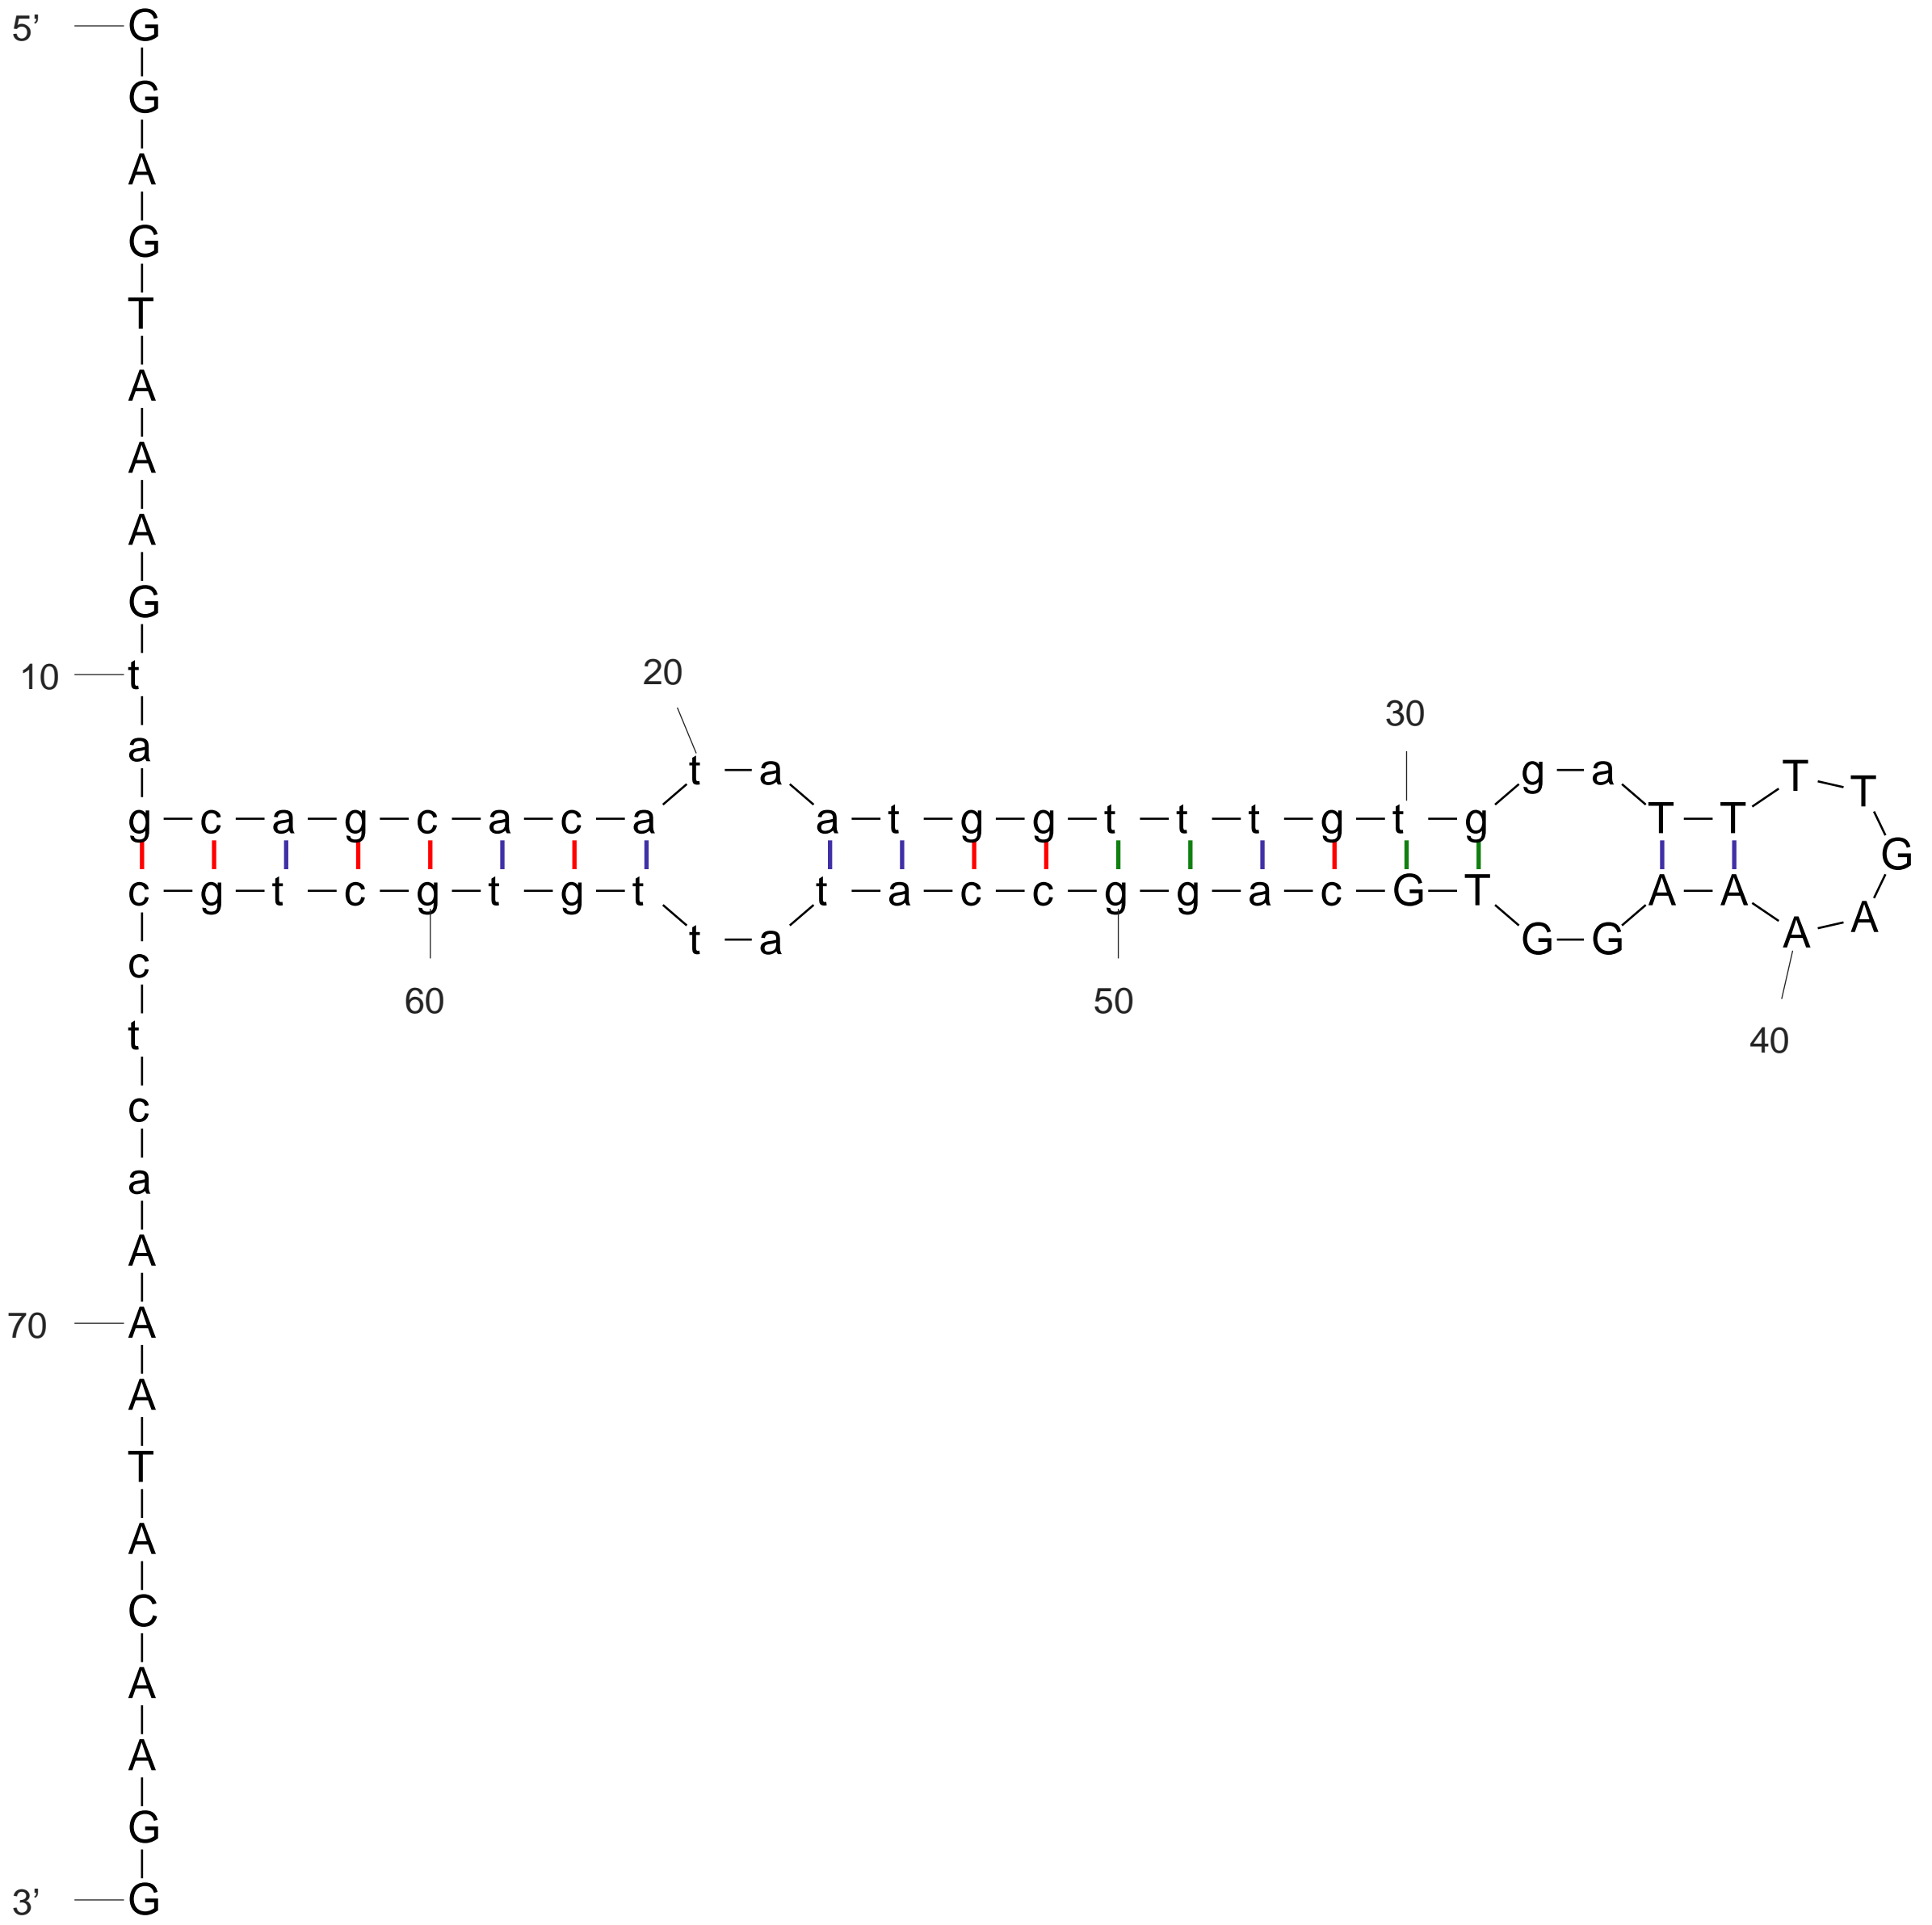

*dG = -11.87 cgr-mir-15a\_db\_K1-P*

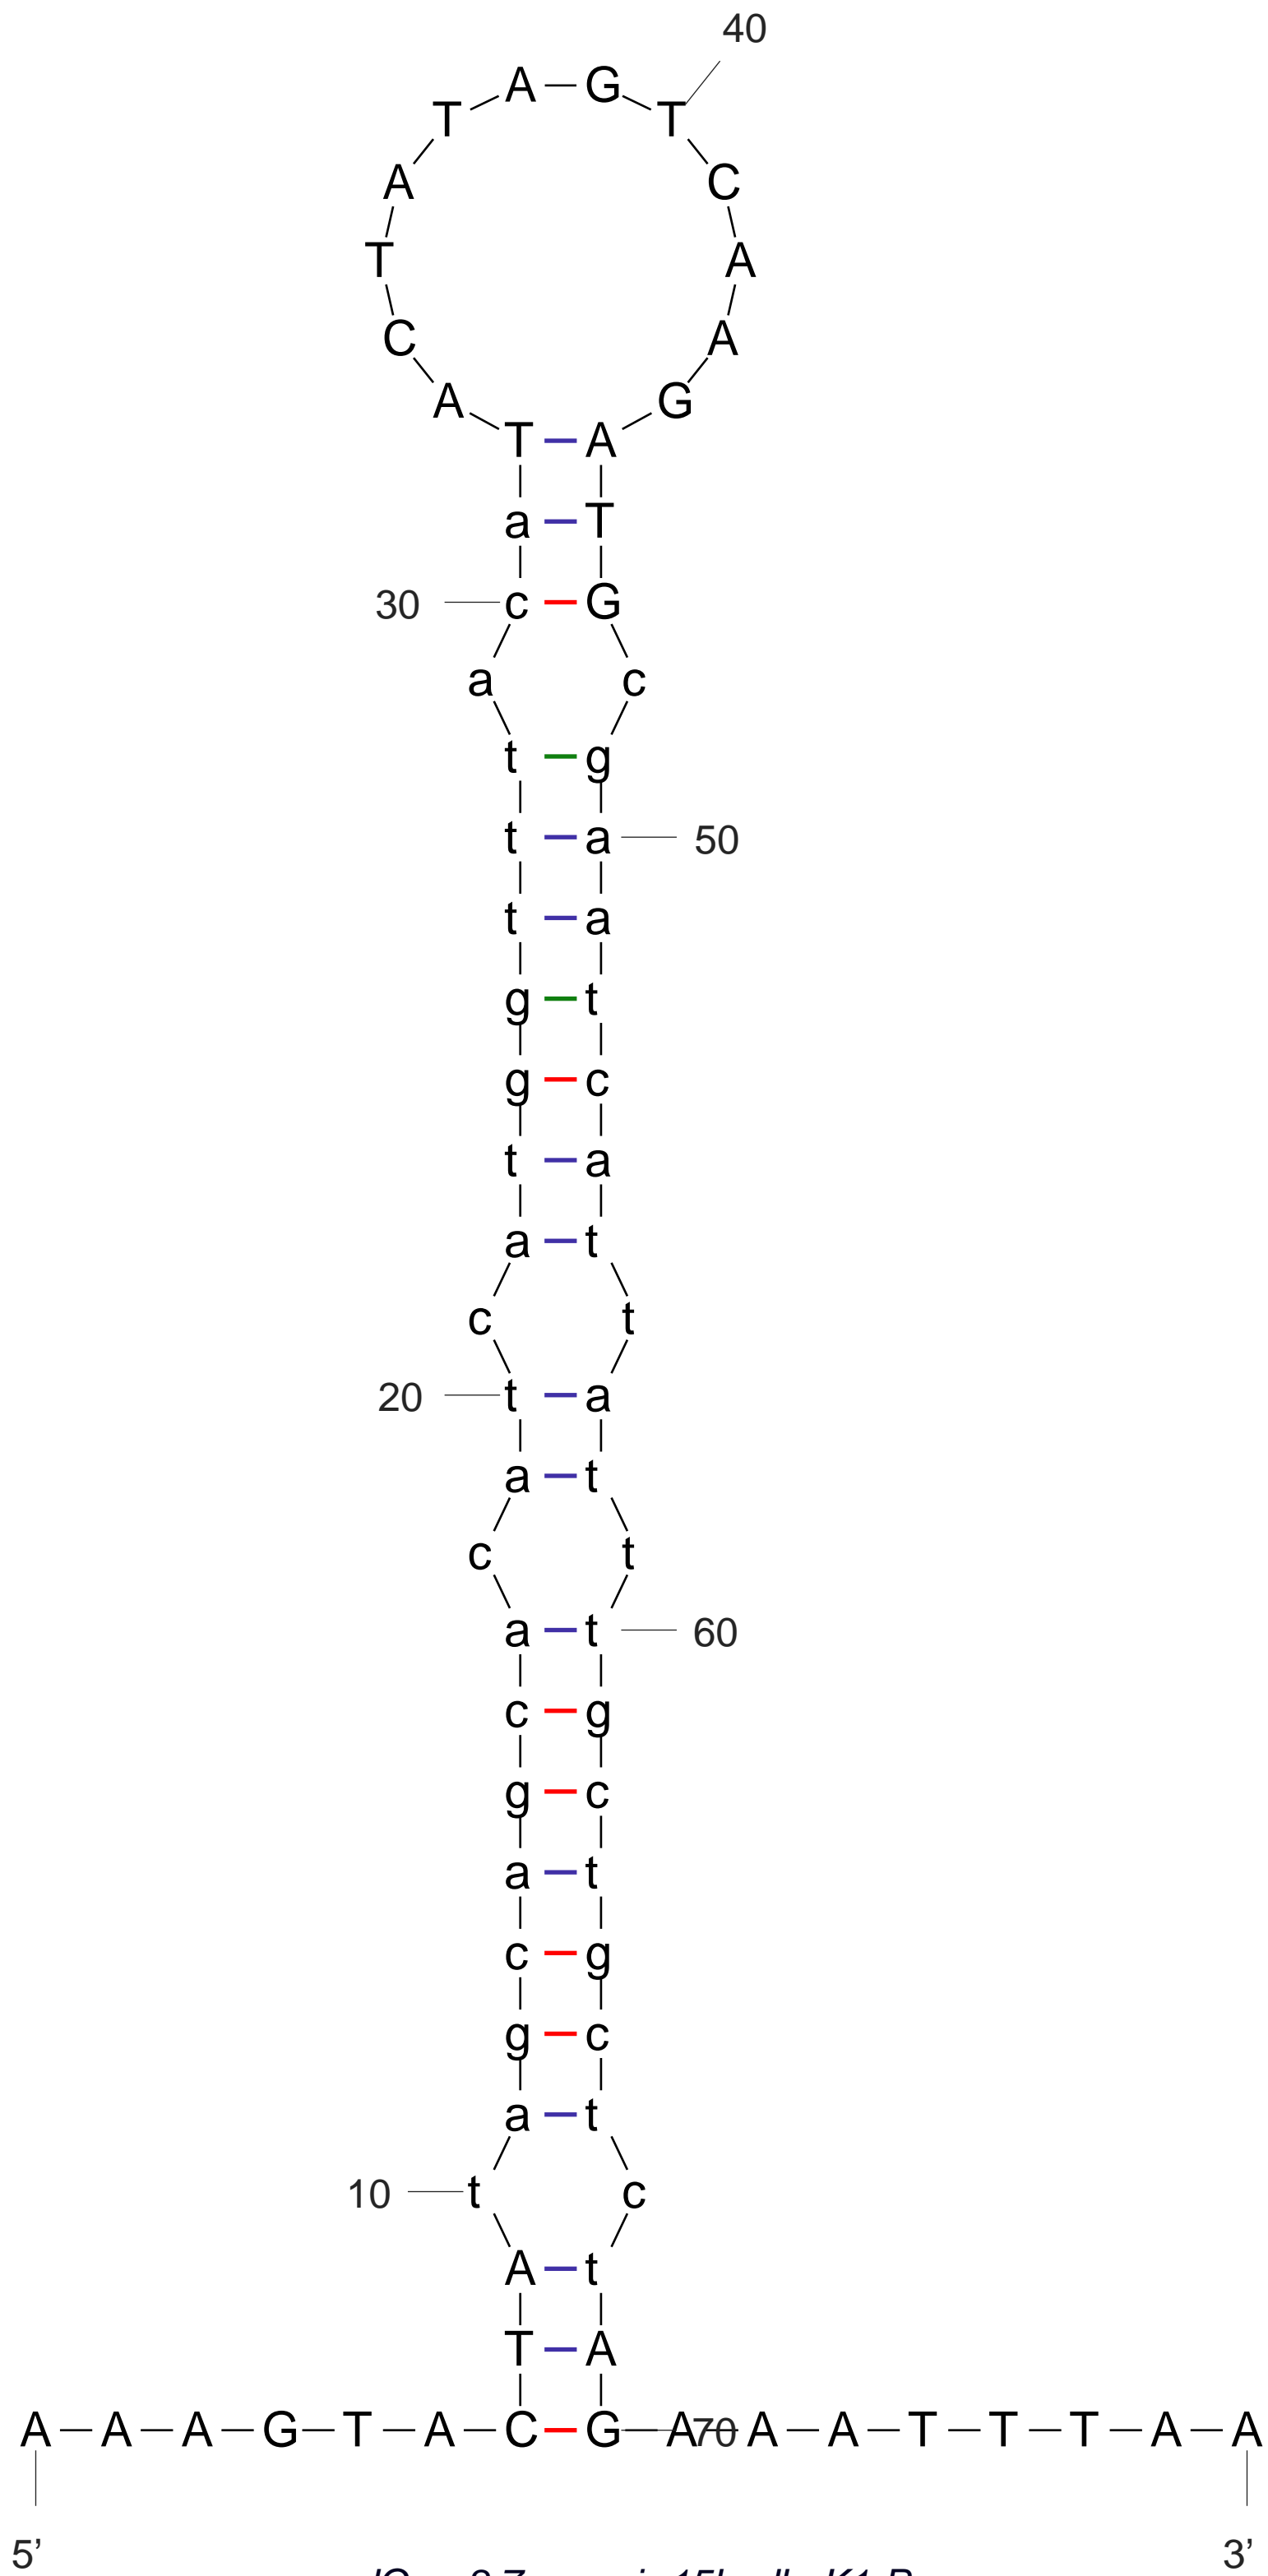

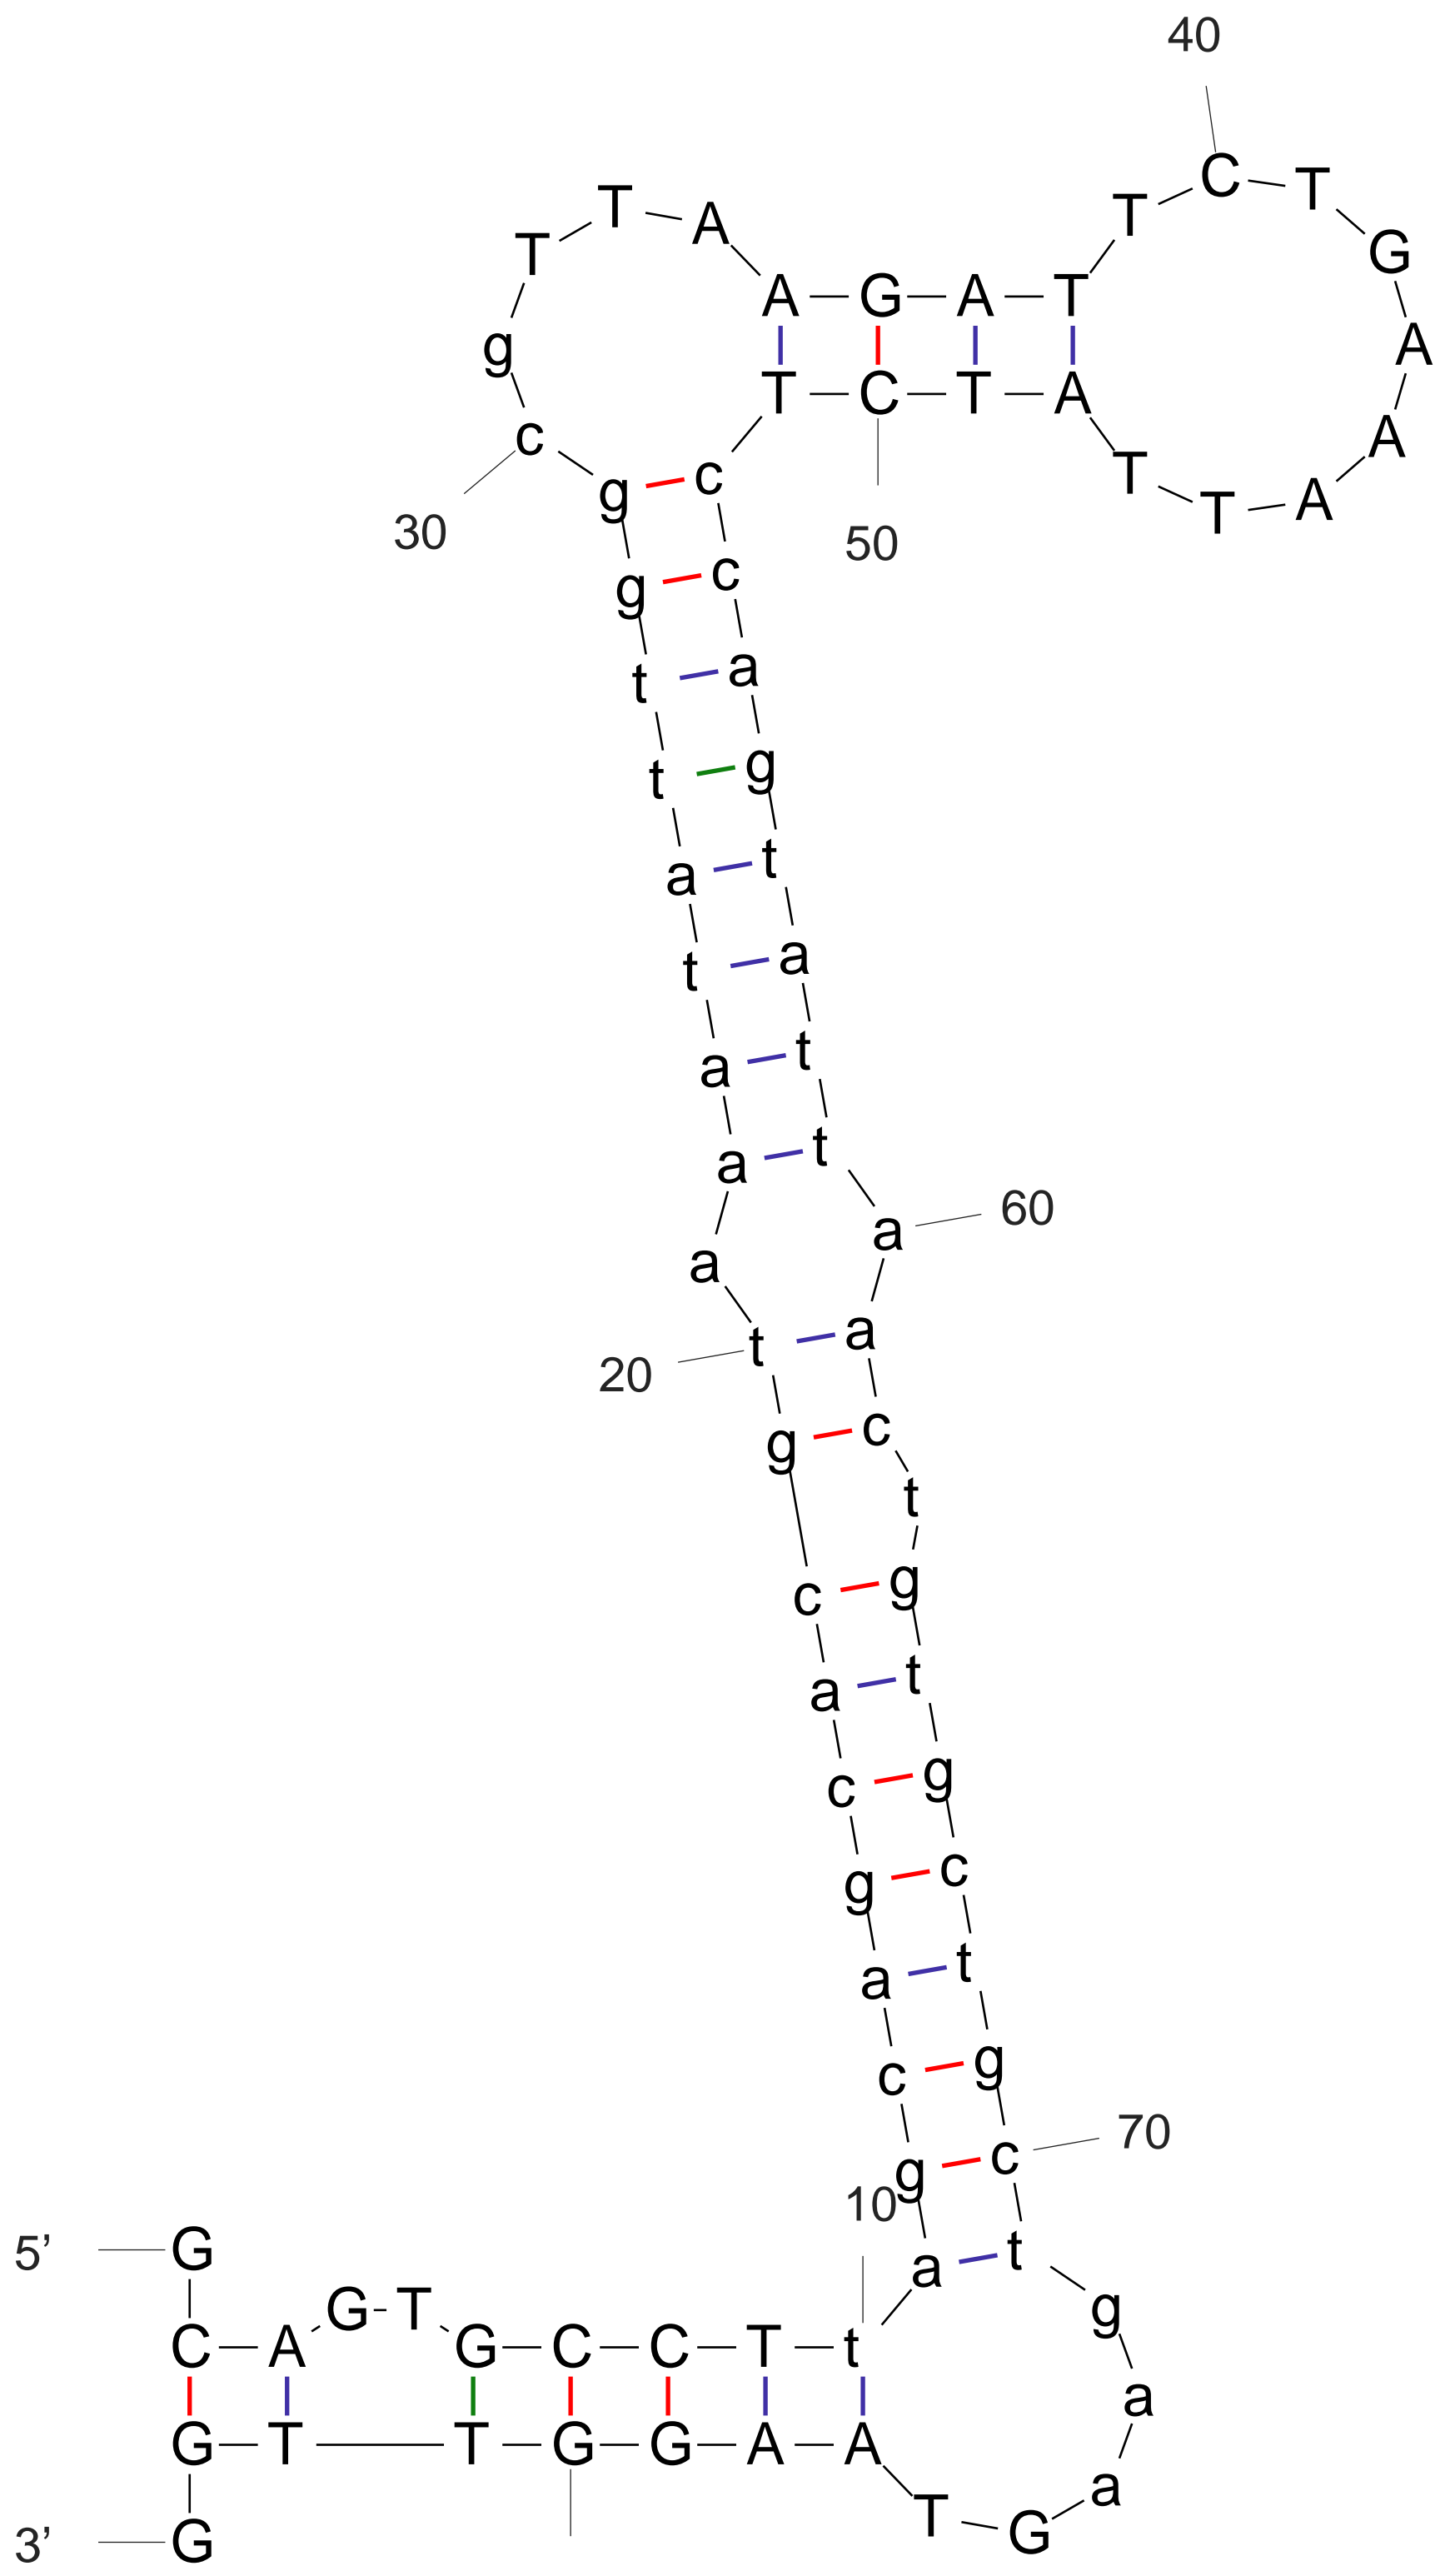

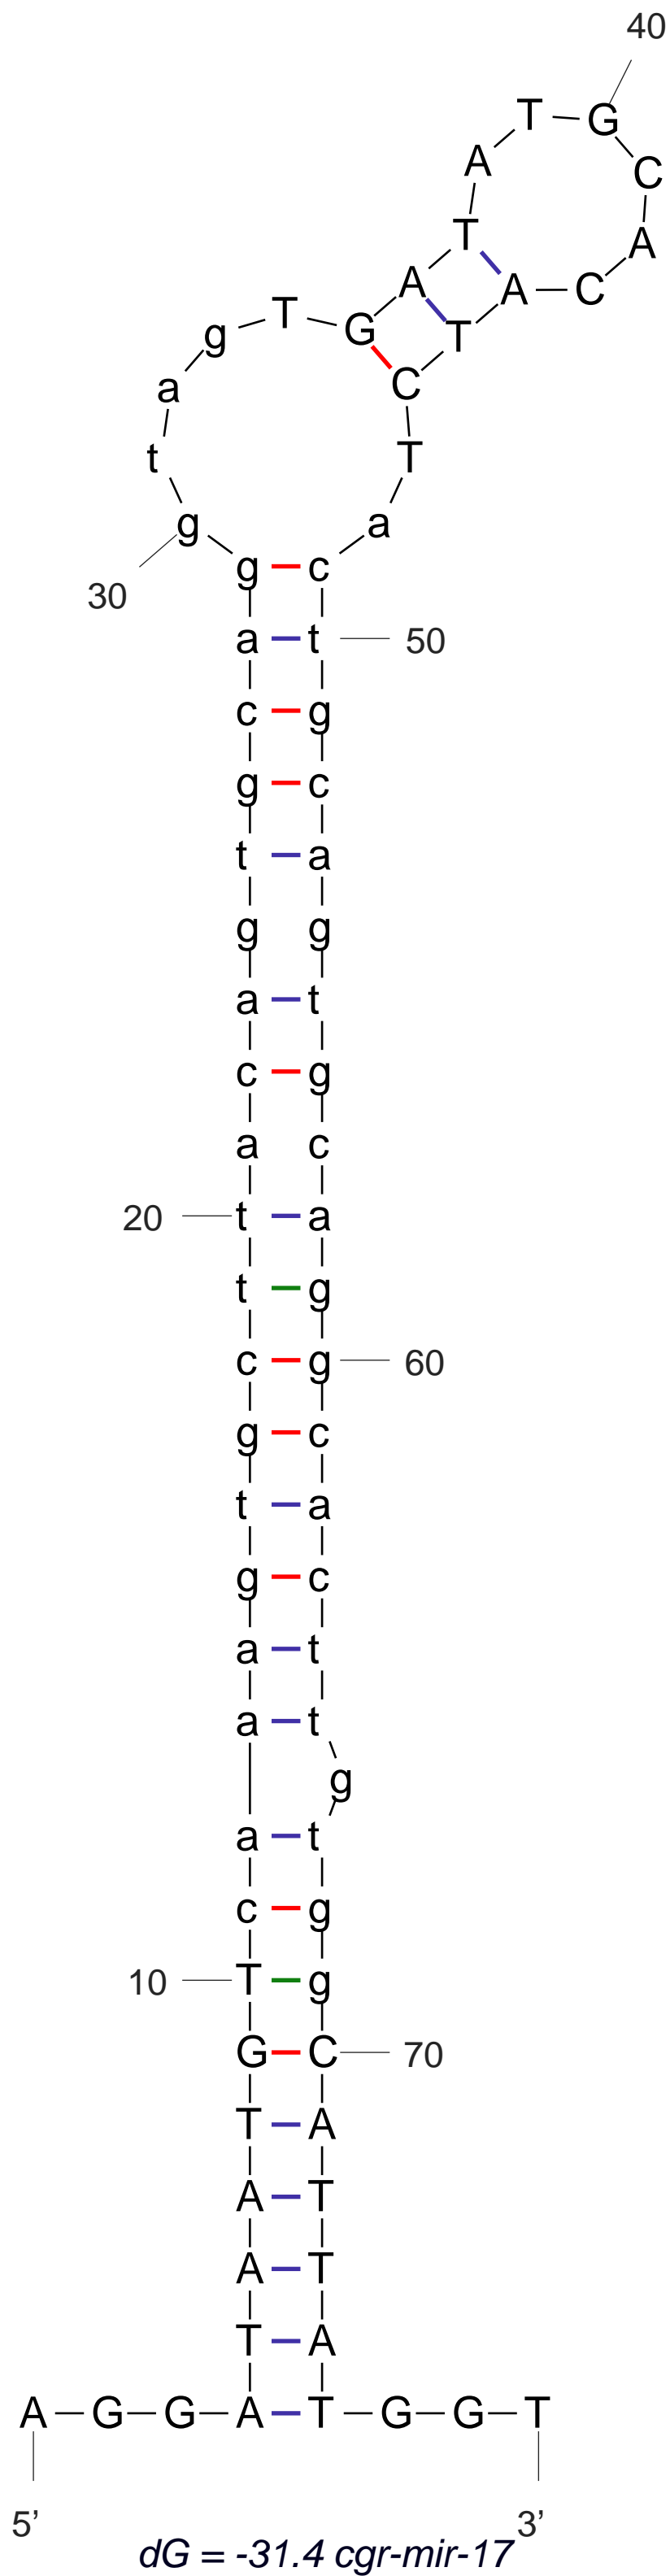



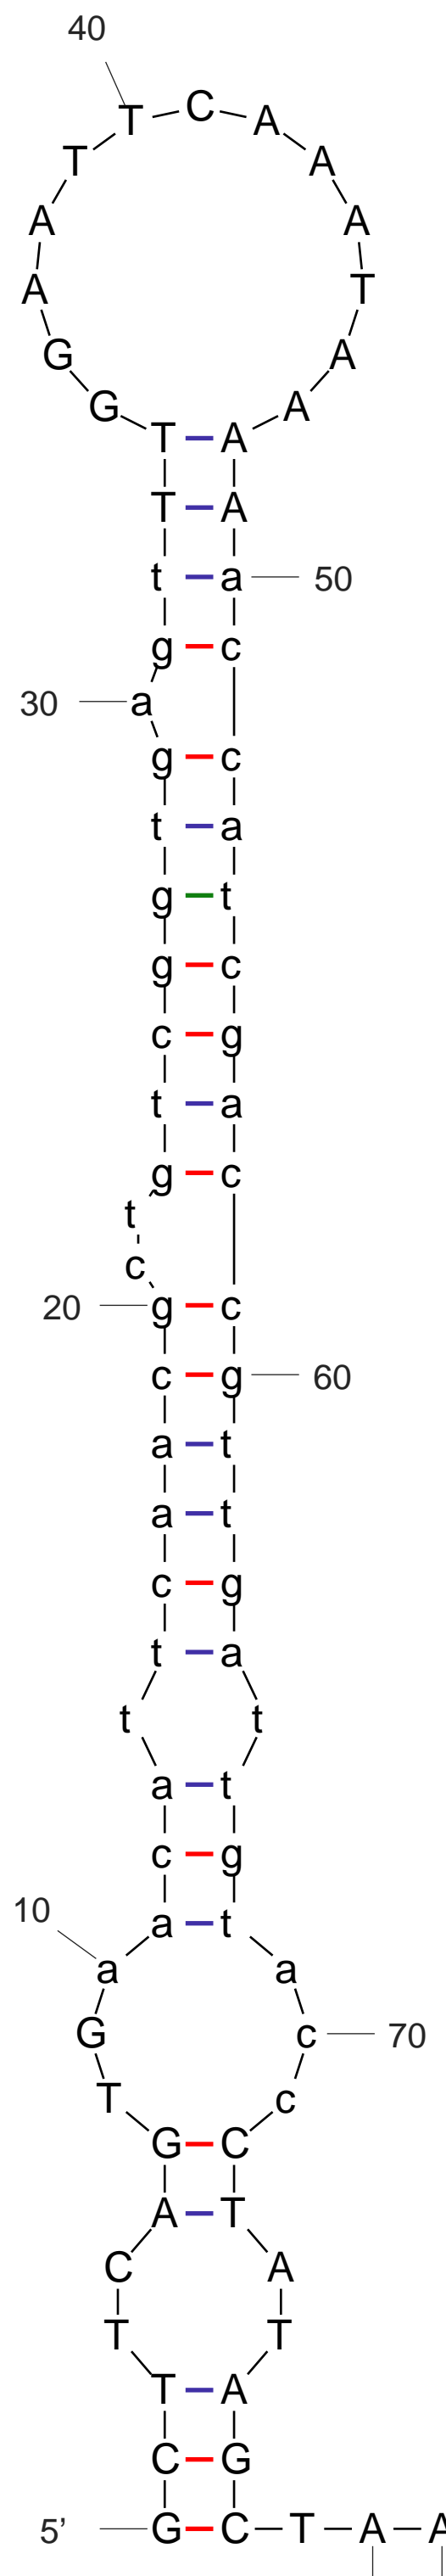

*dG = -9.58 cgr-mir-181a\_db\_K1-P*

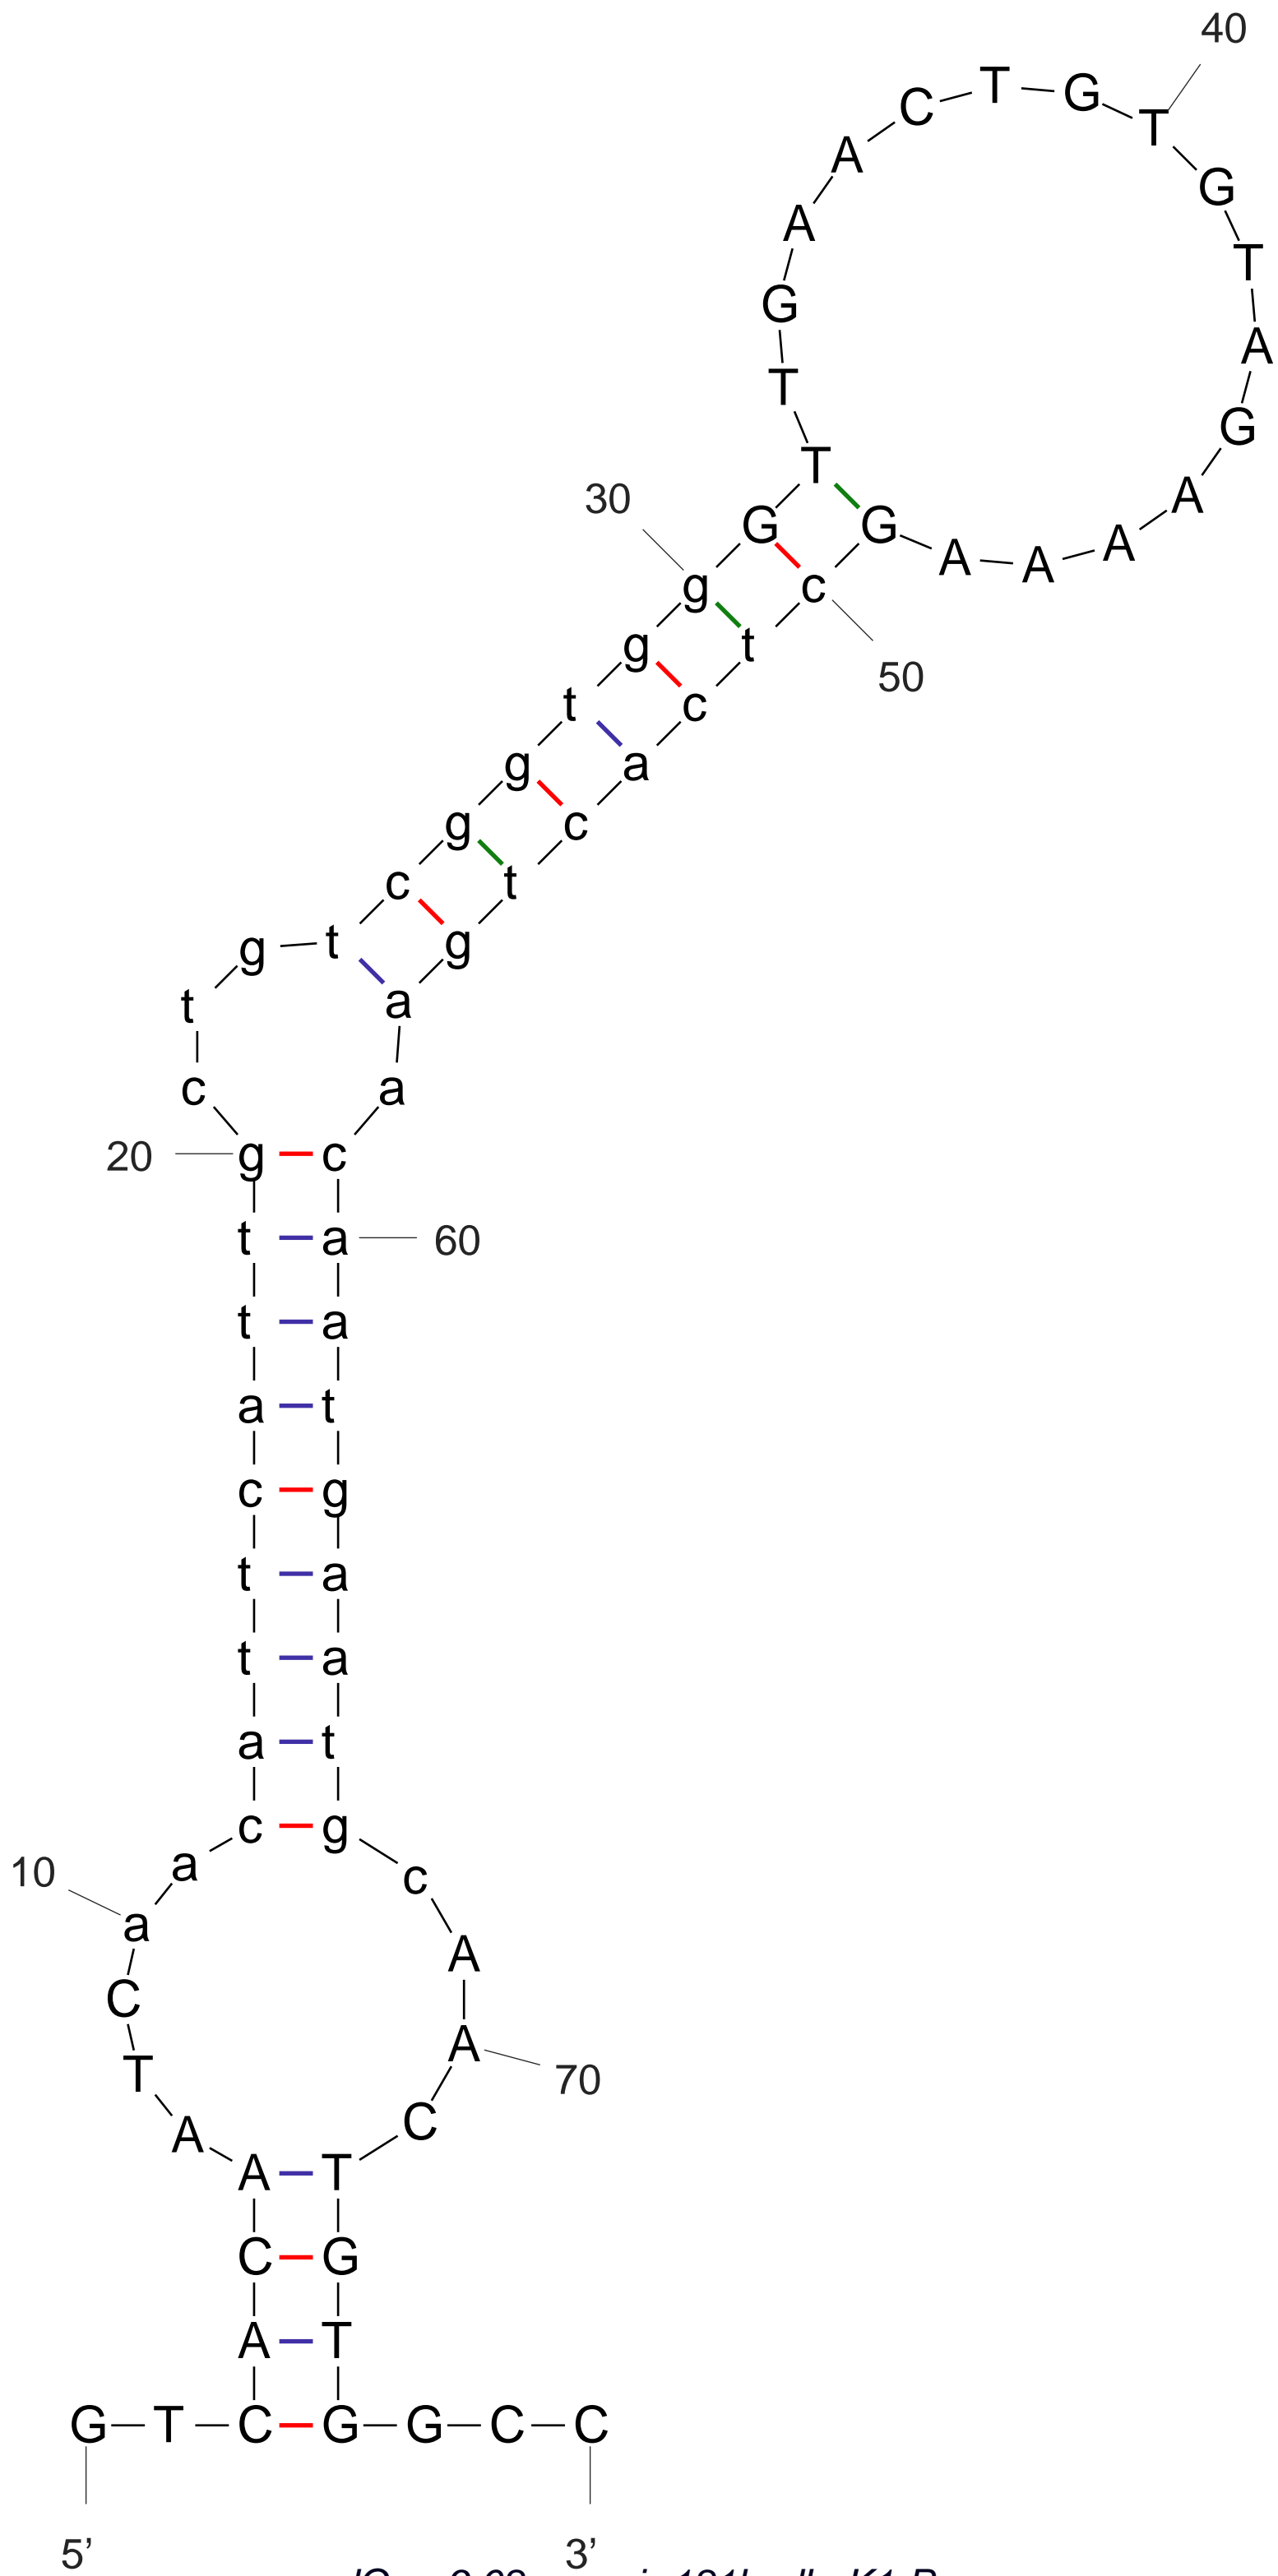

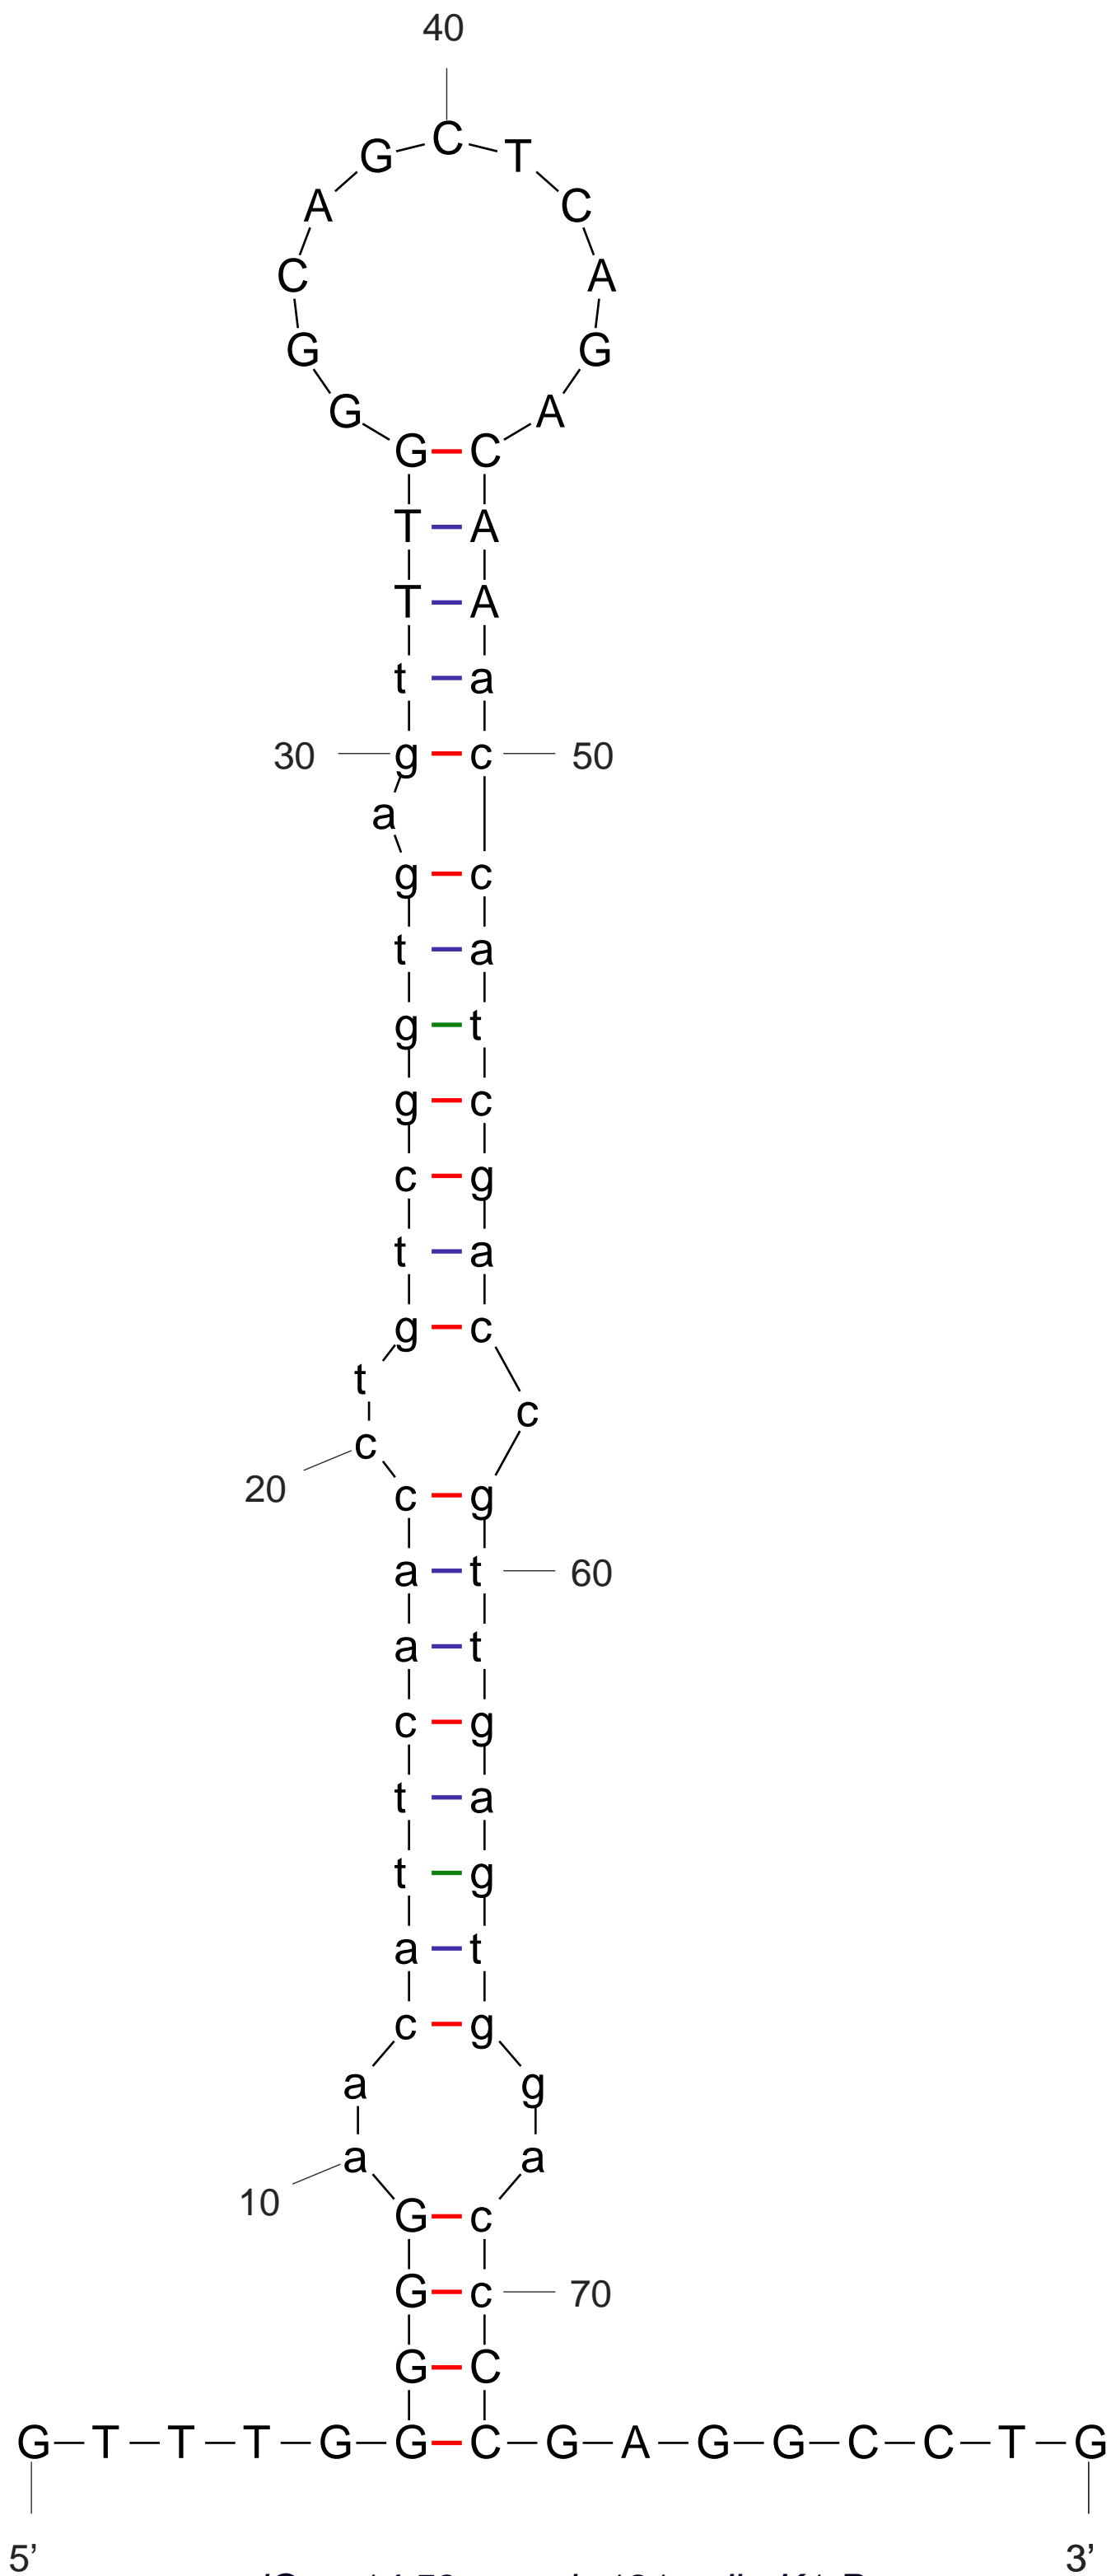

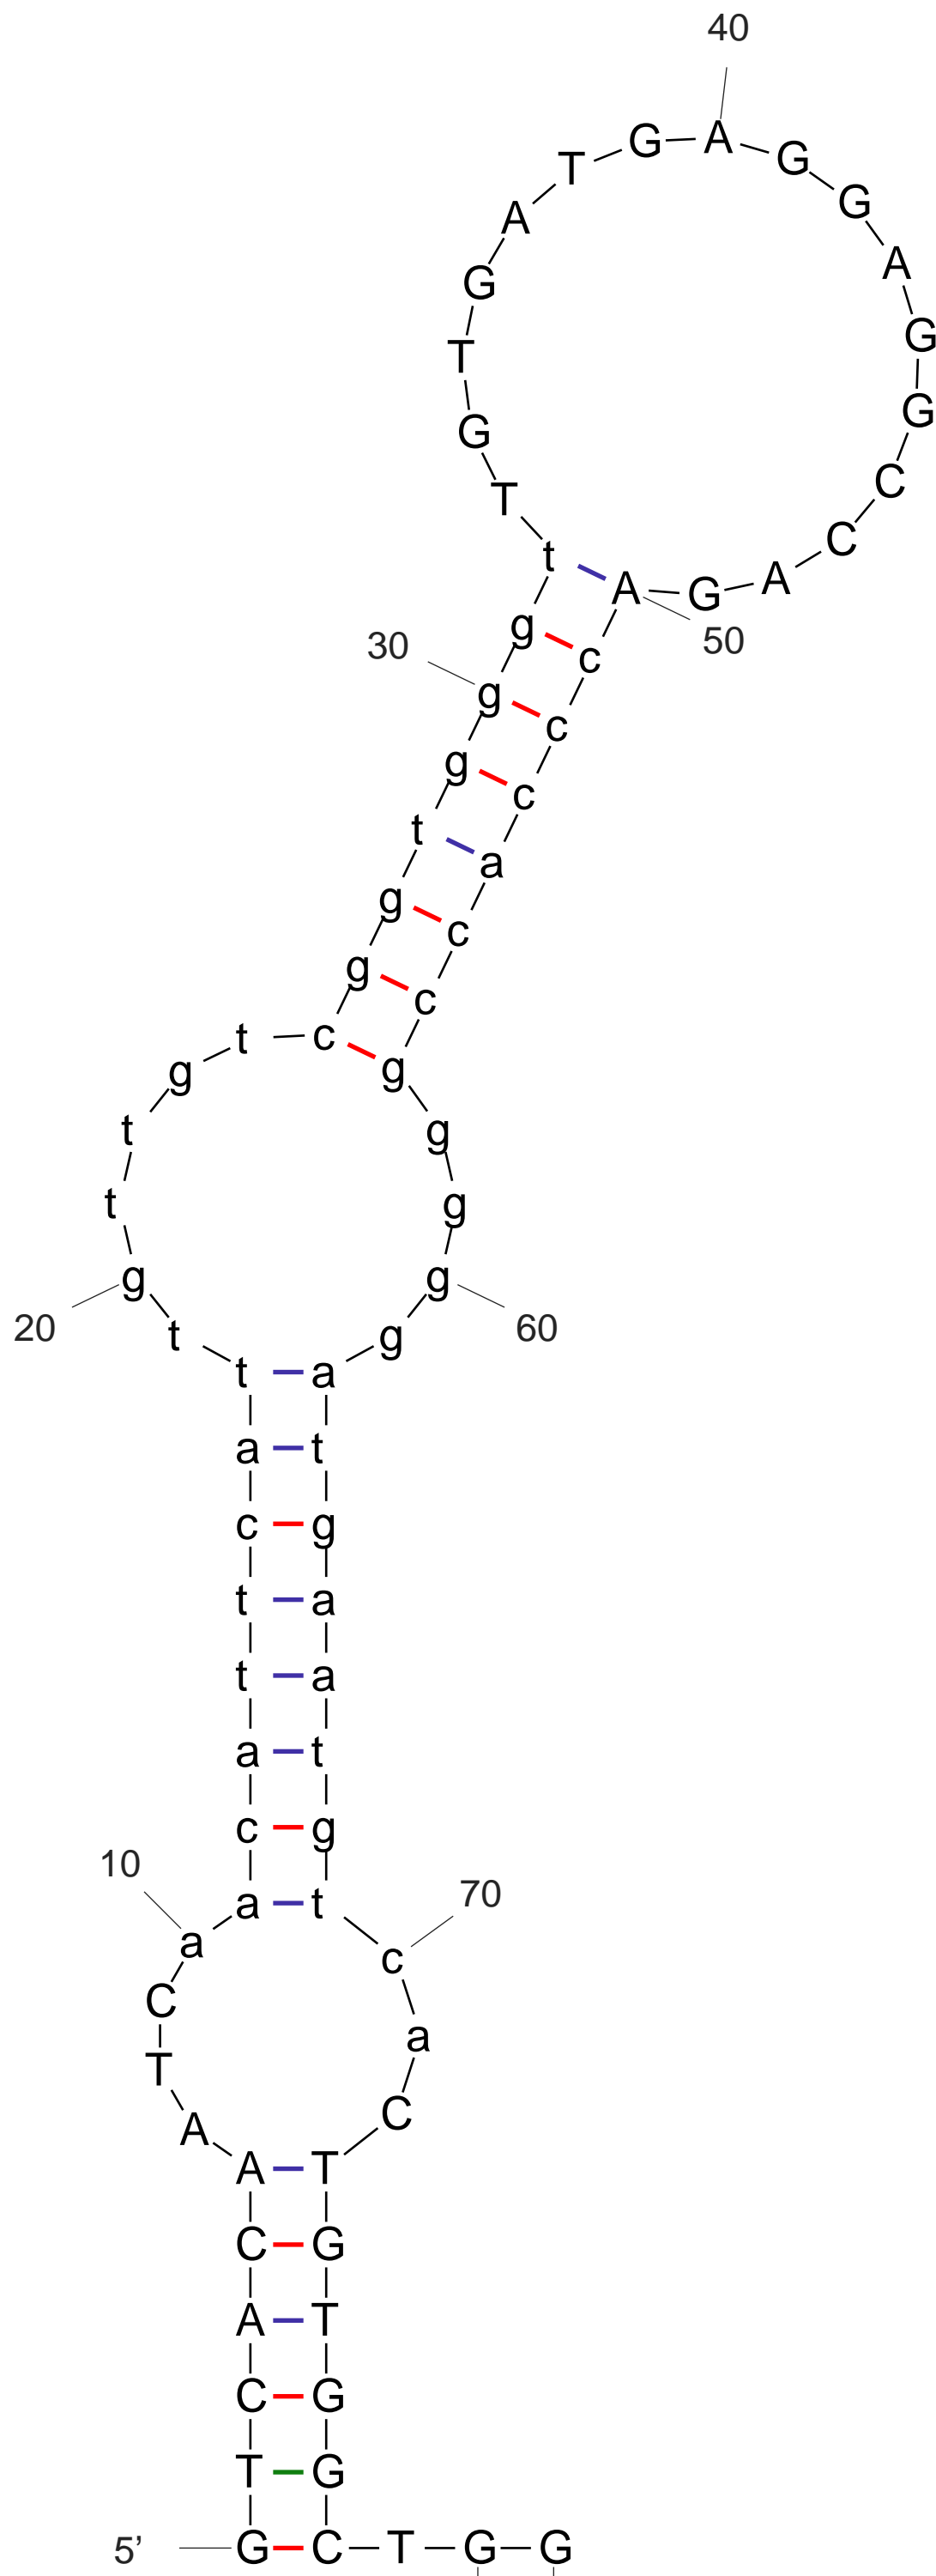

dG = -13.79 cgr-mir-181d\_db\_K1-P

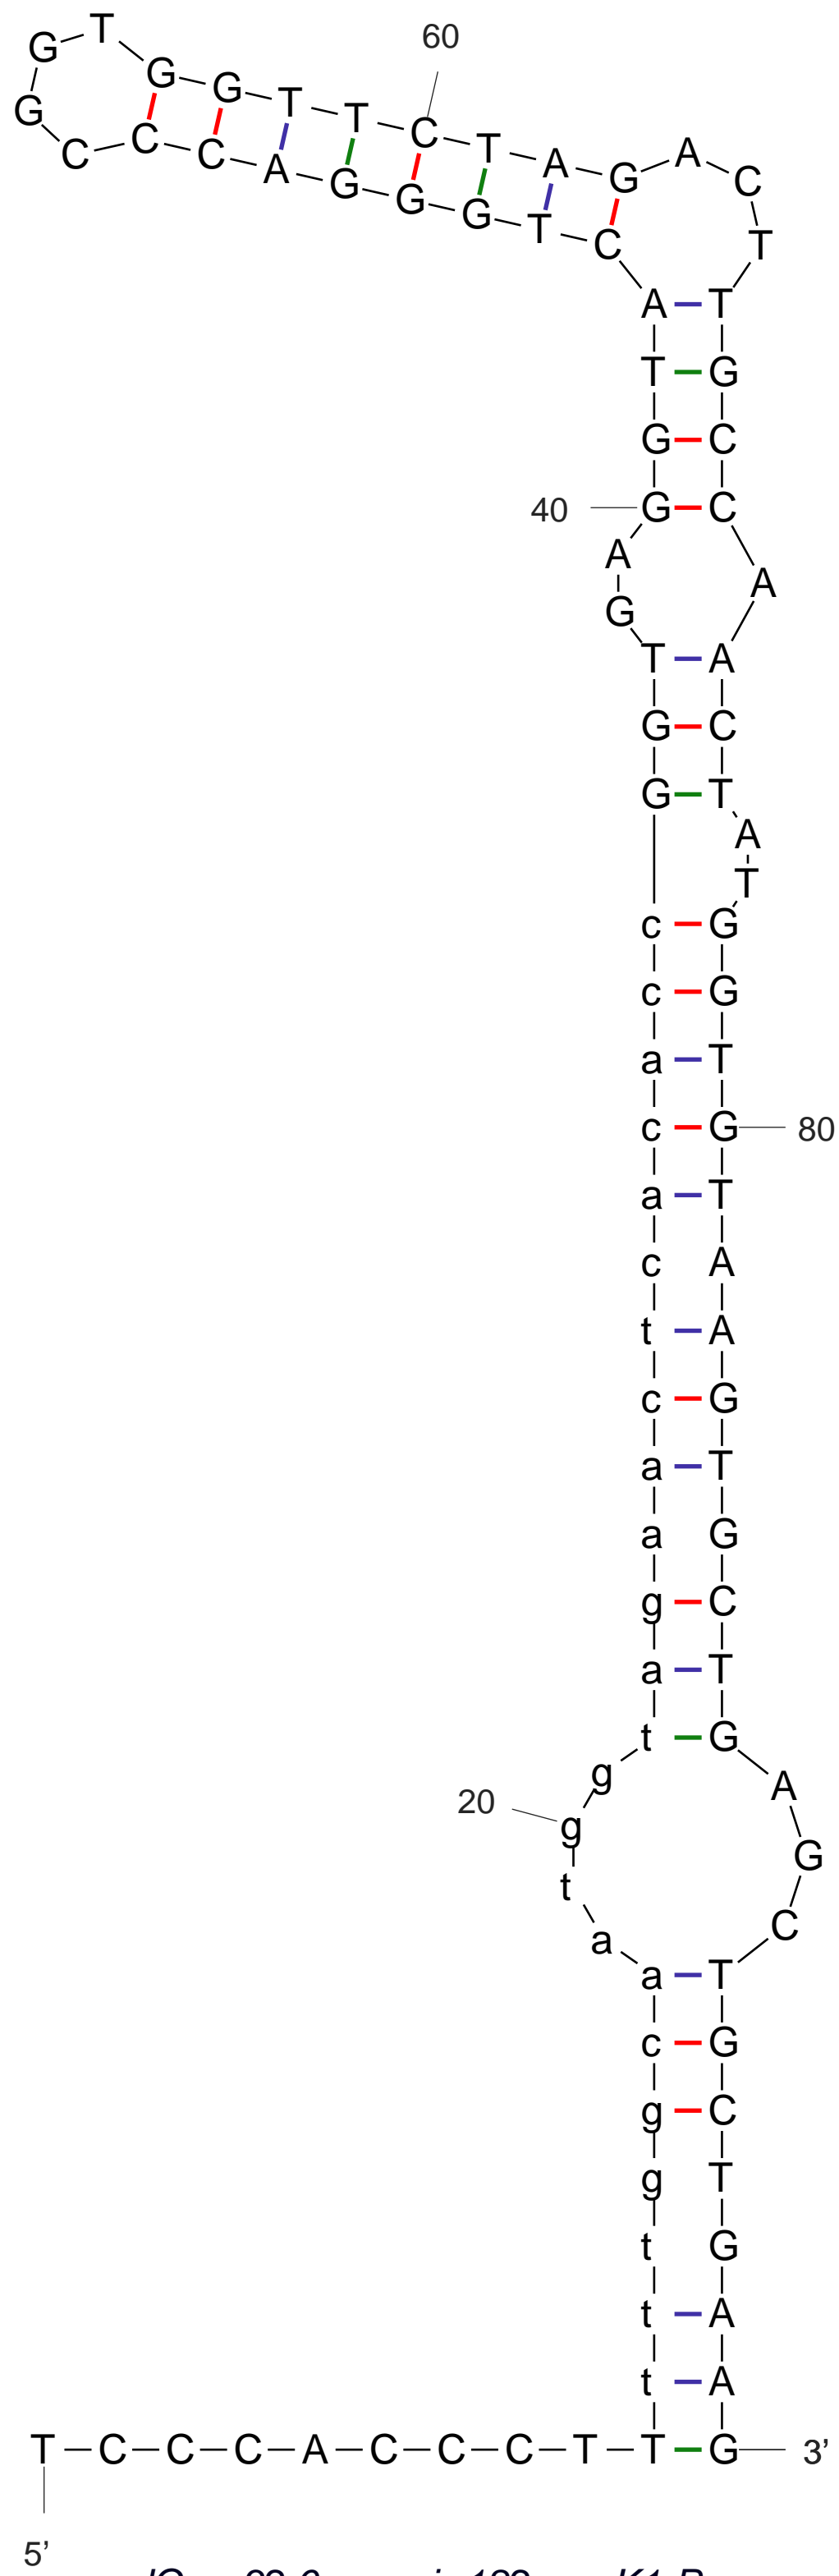

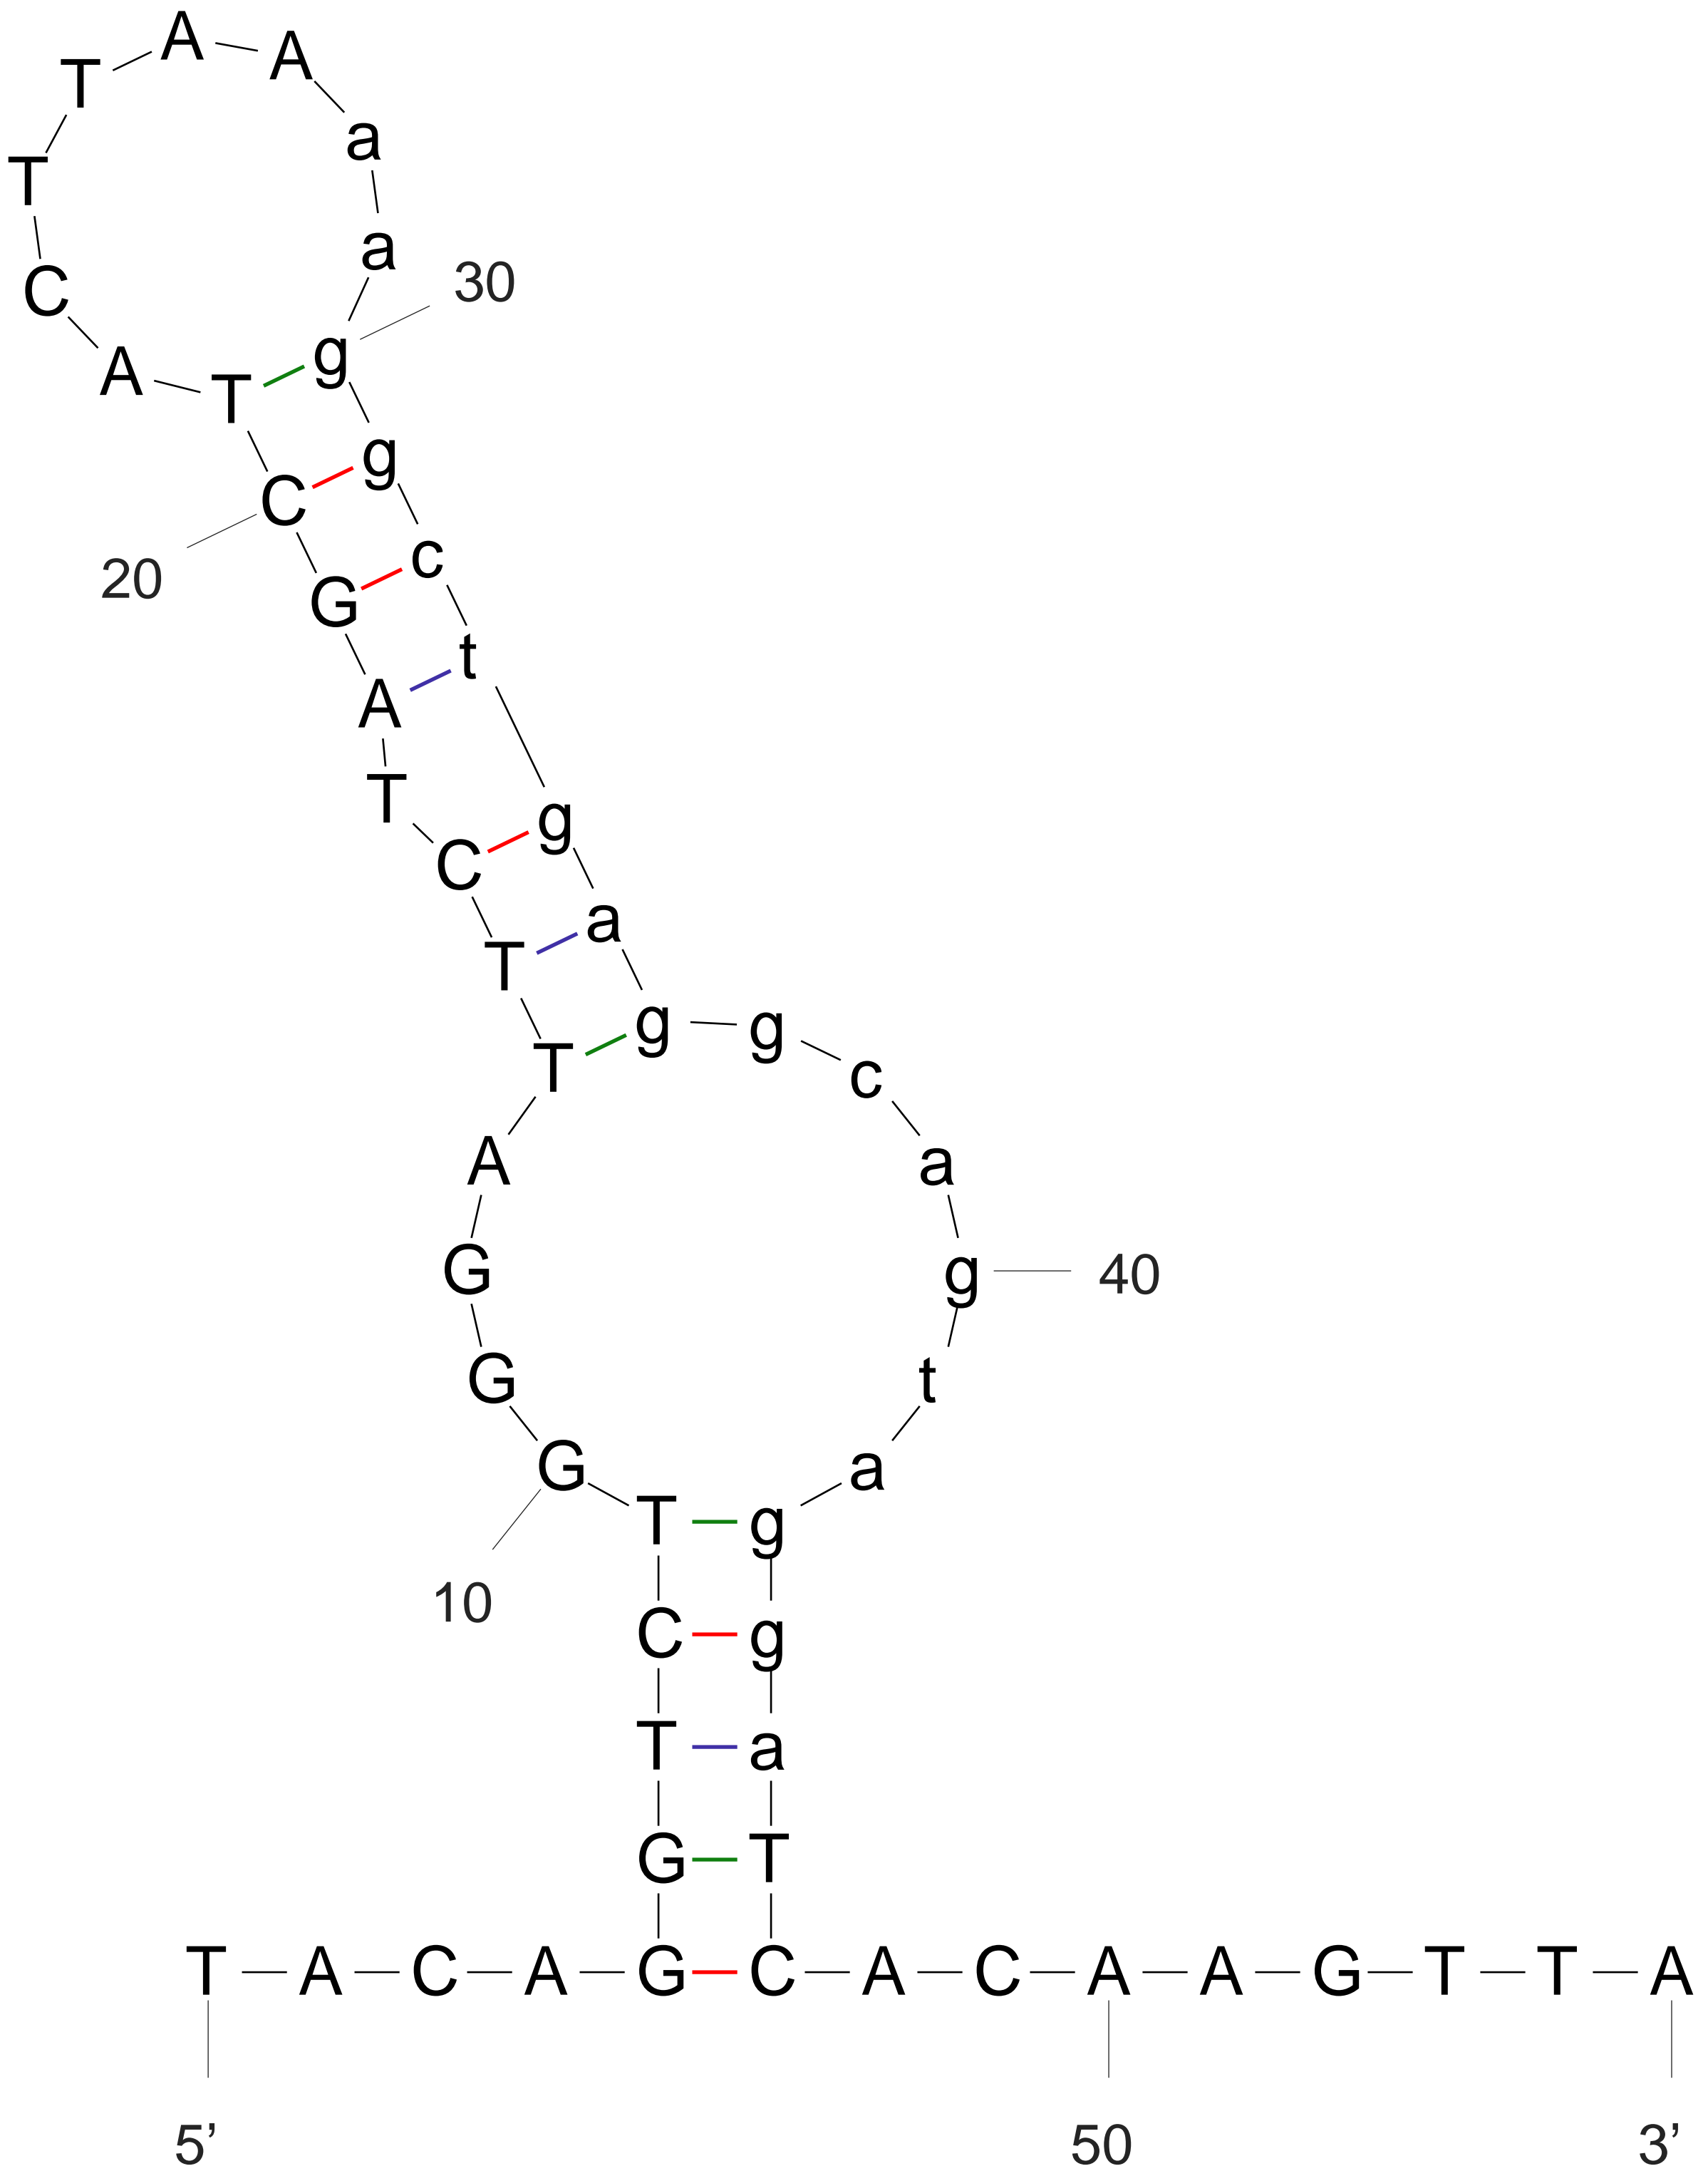

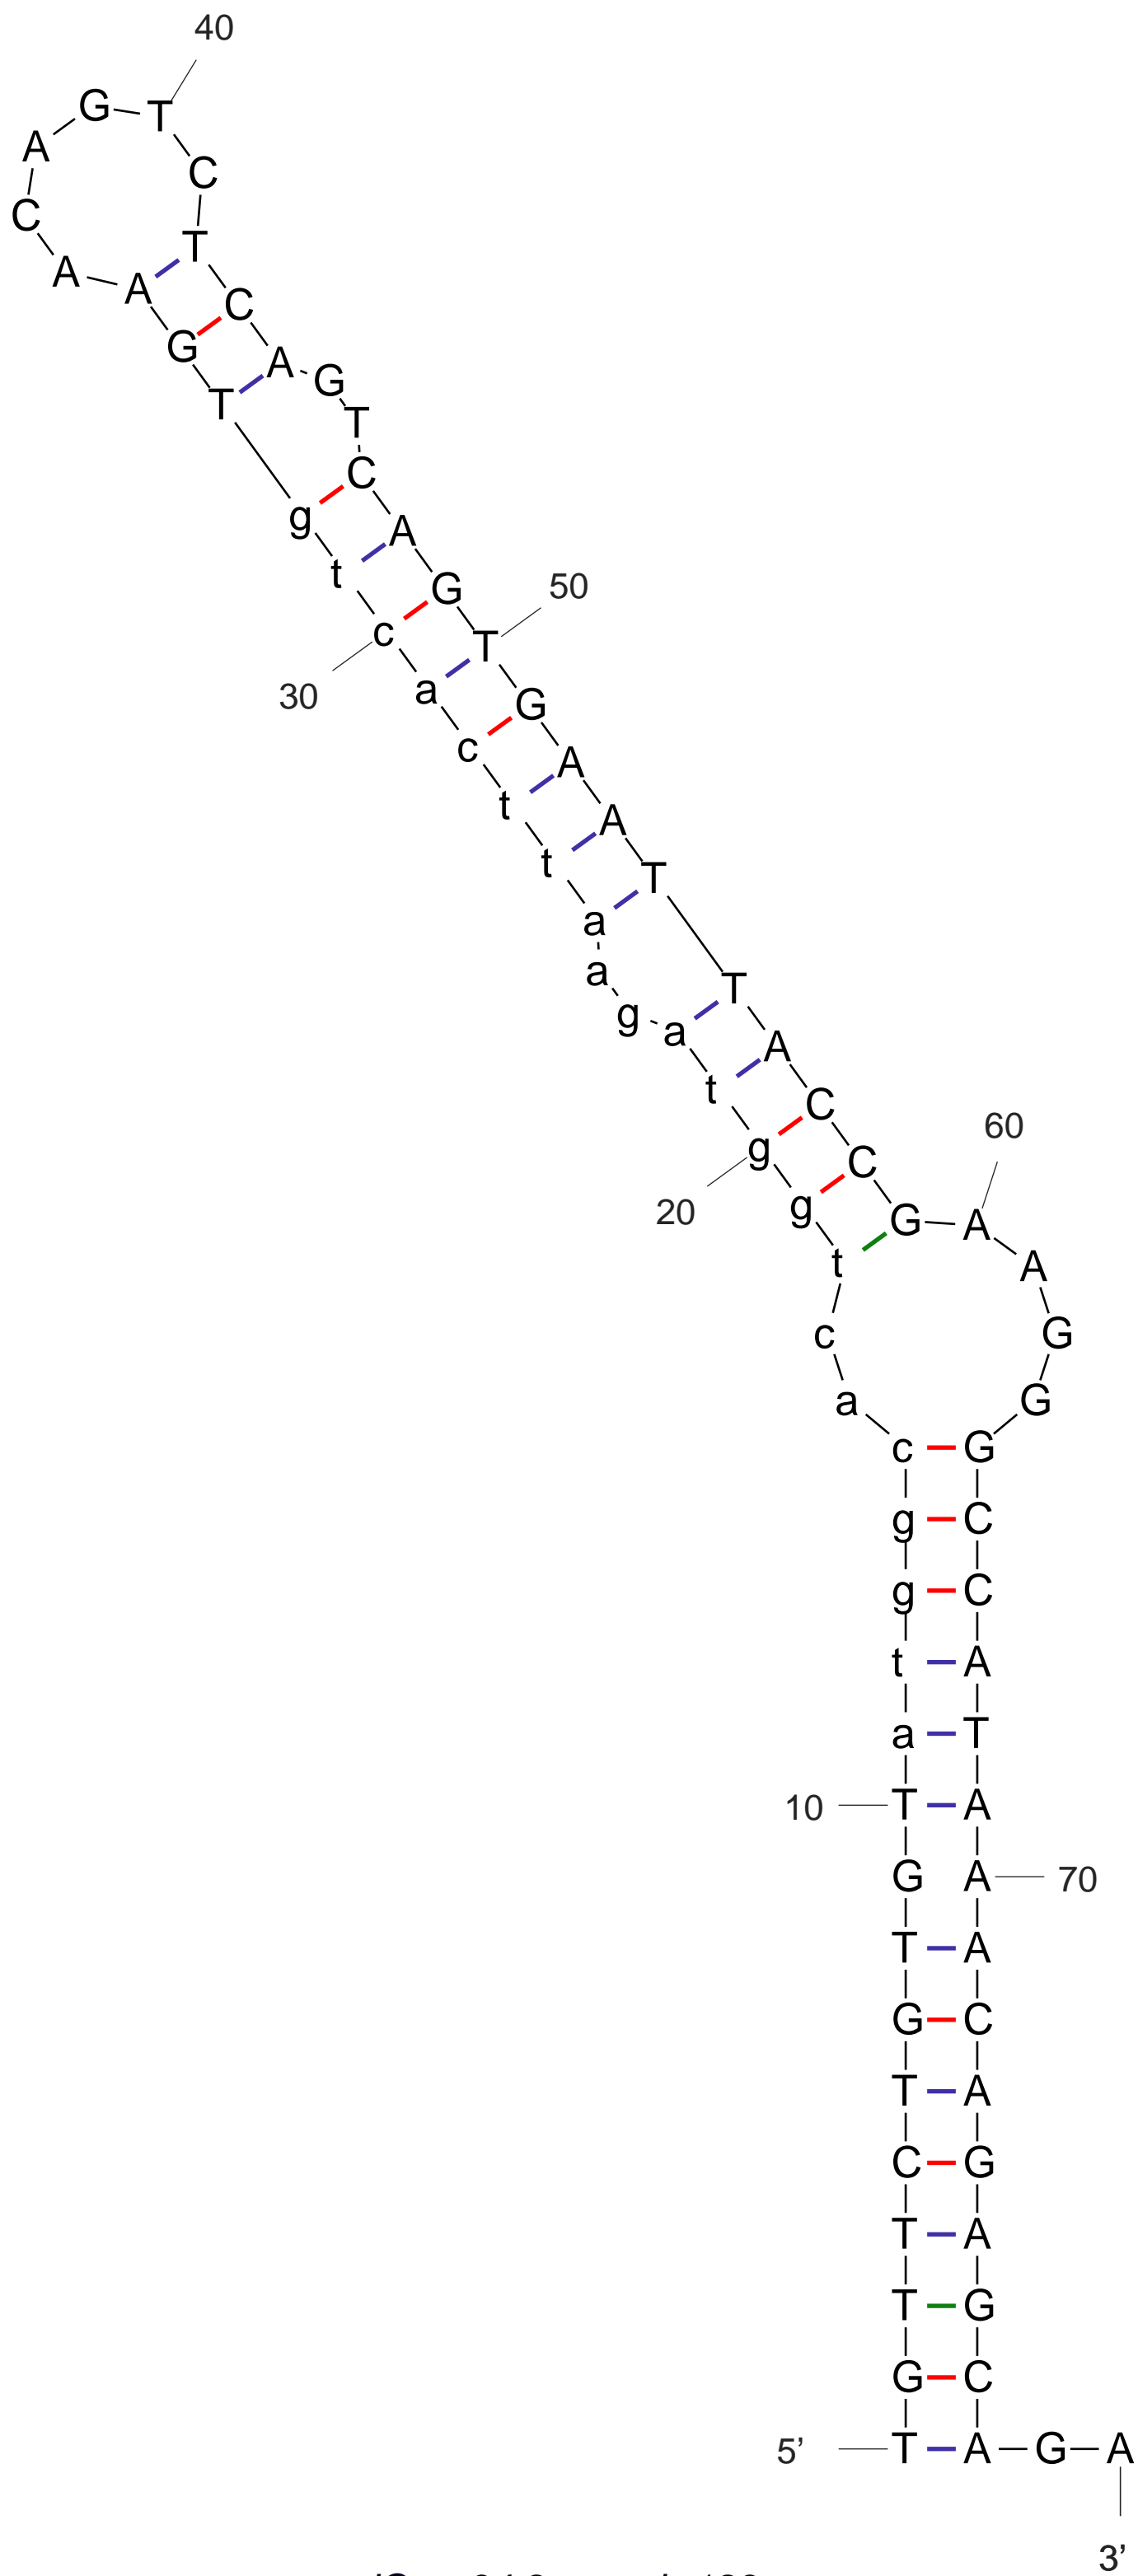

$dG = -34.8$  *cgr-mir-183*

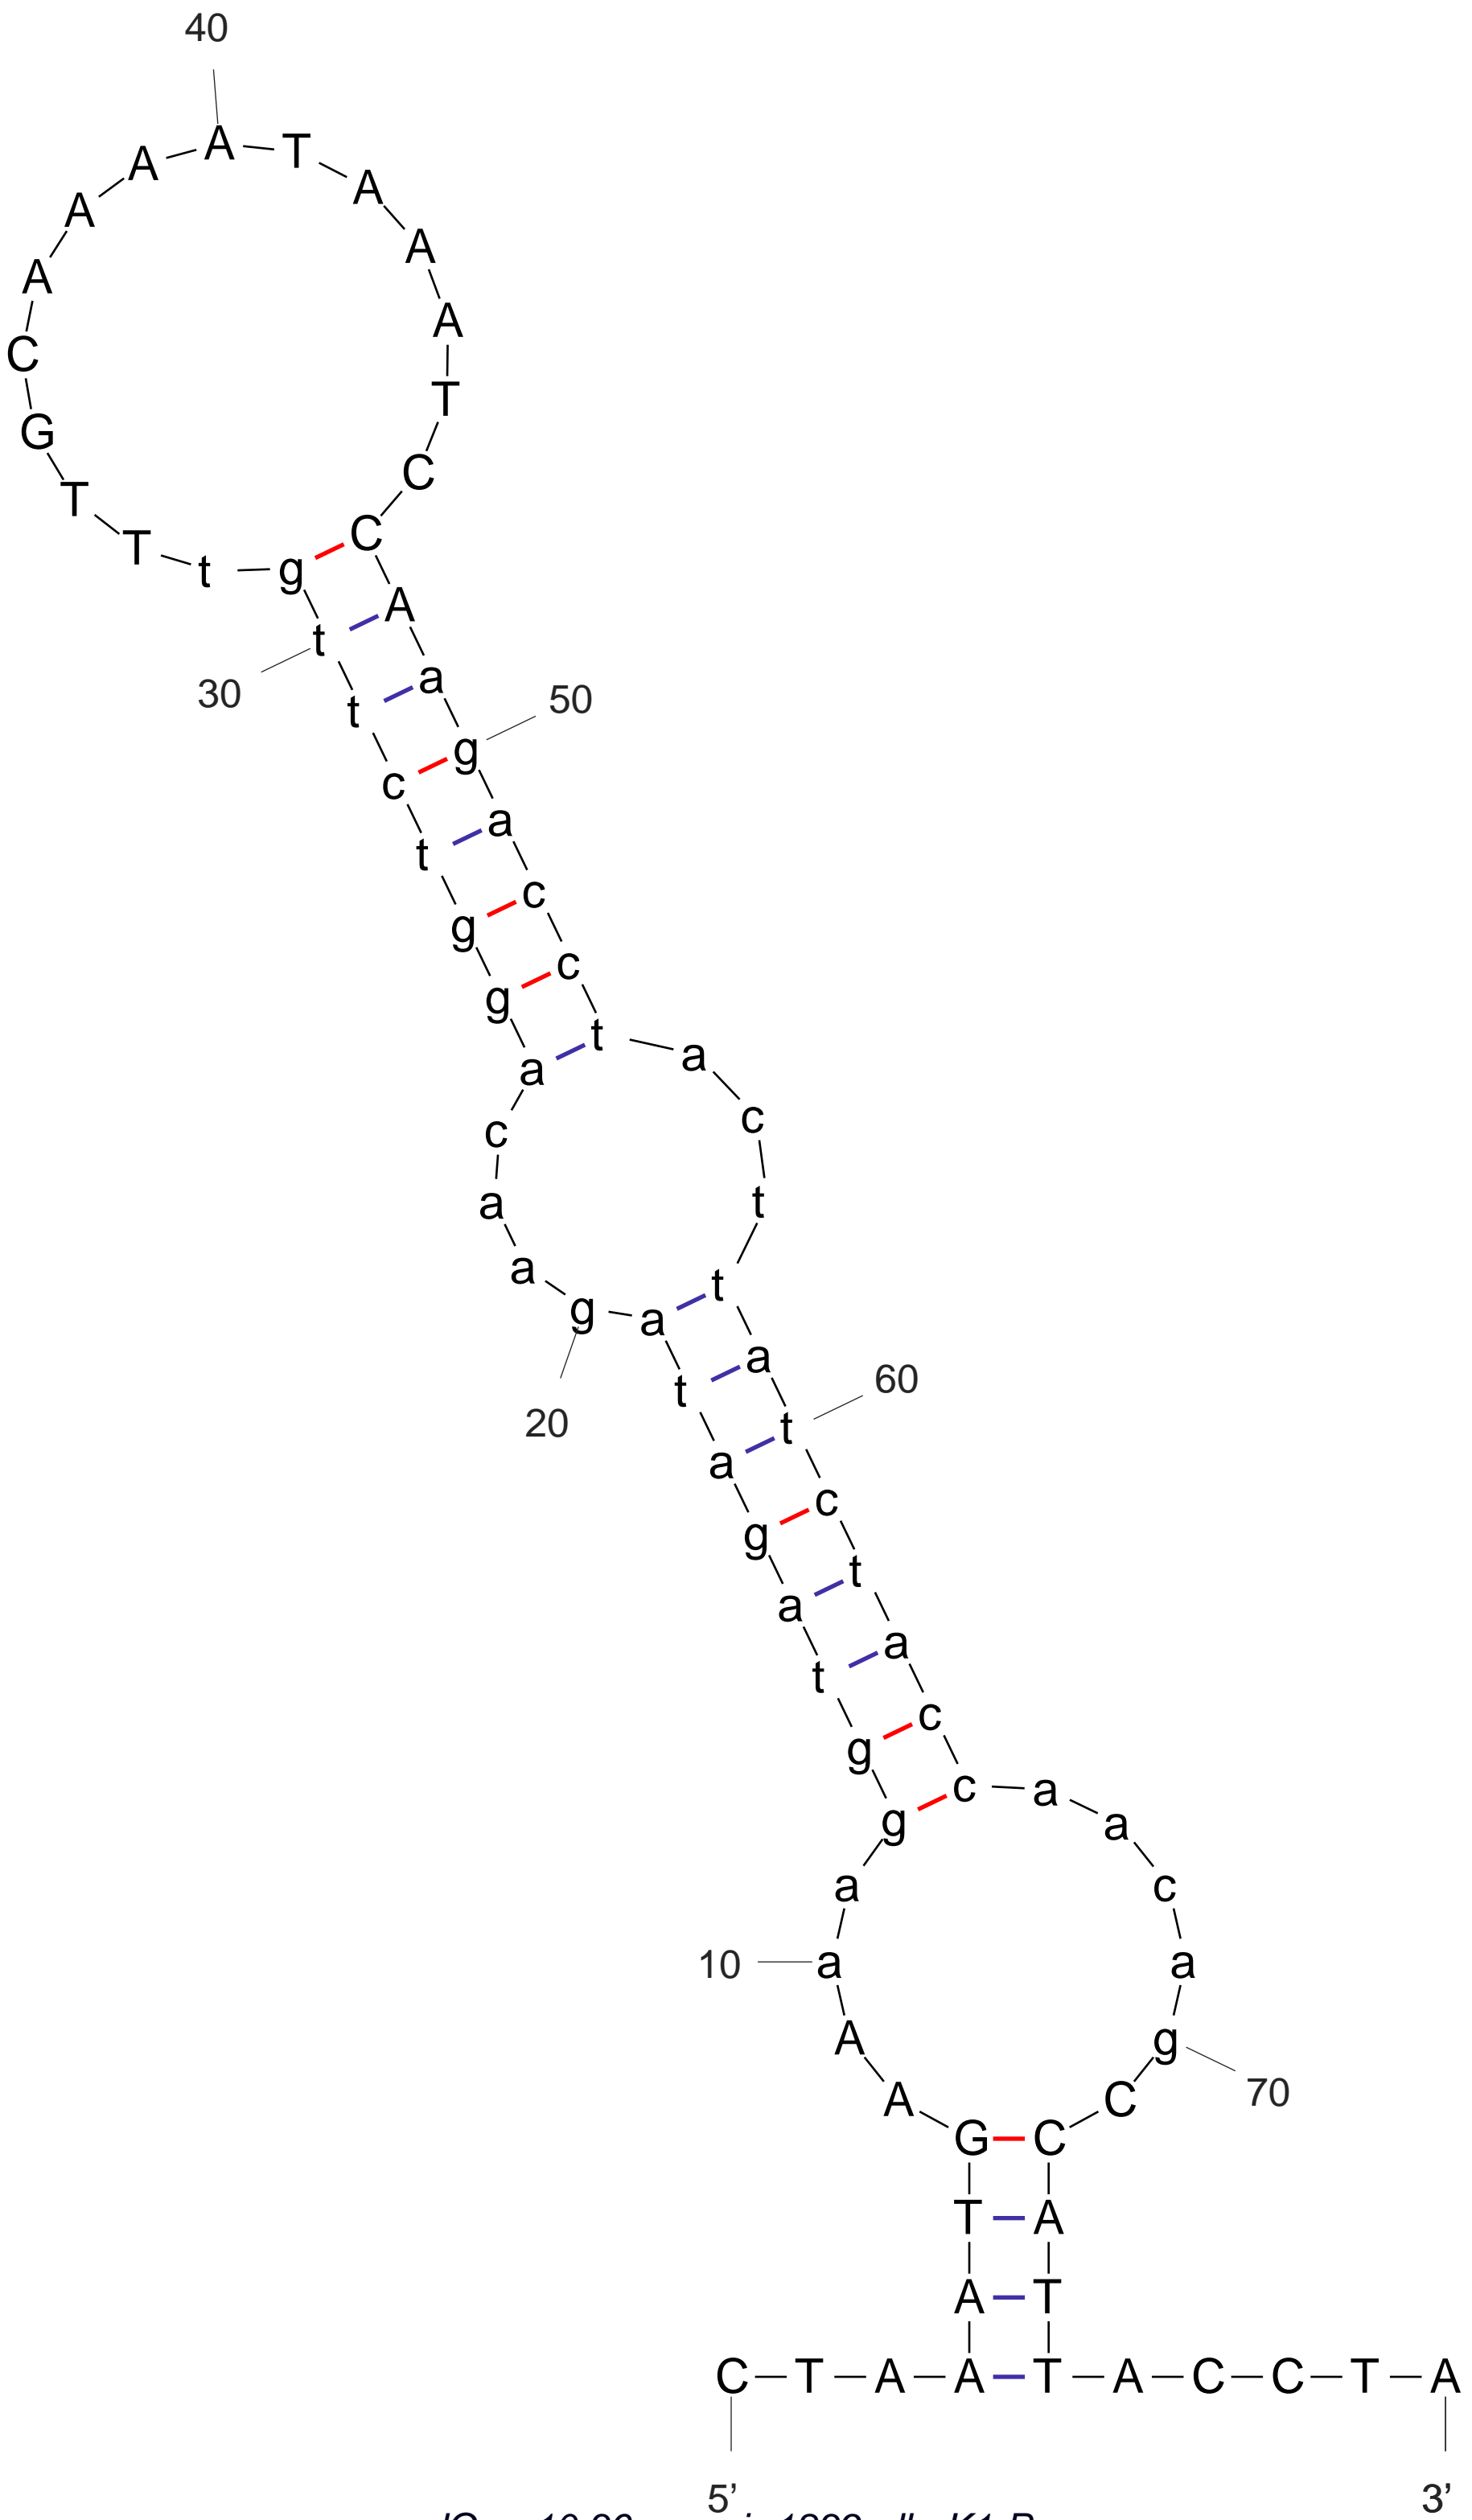

$dG = -10.36$  *cgr-mir-1839\_db\_K1-P*





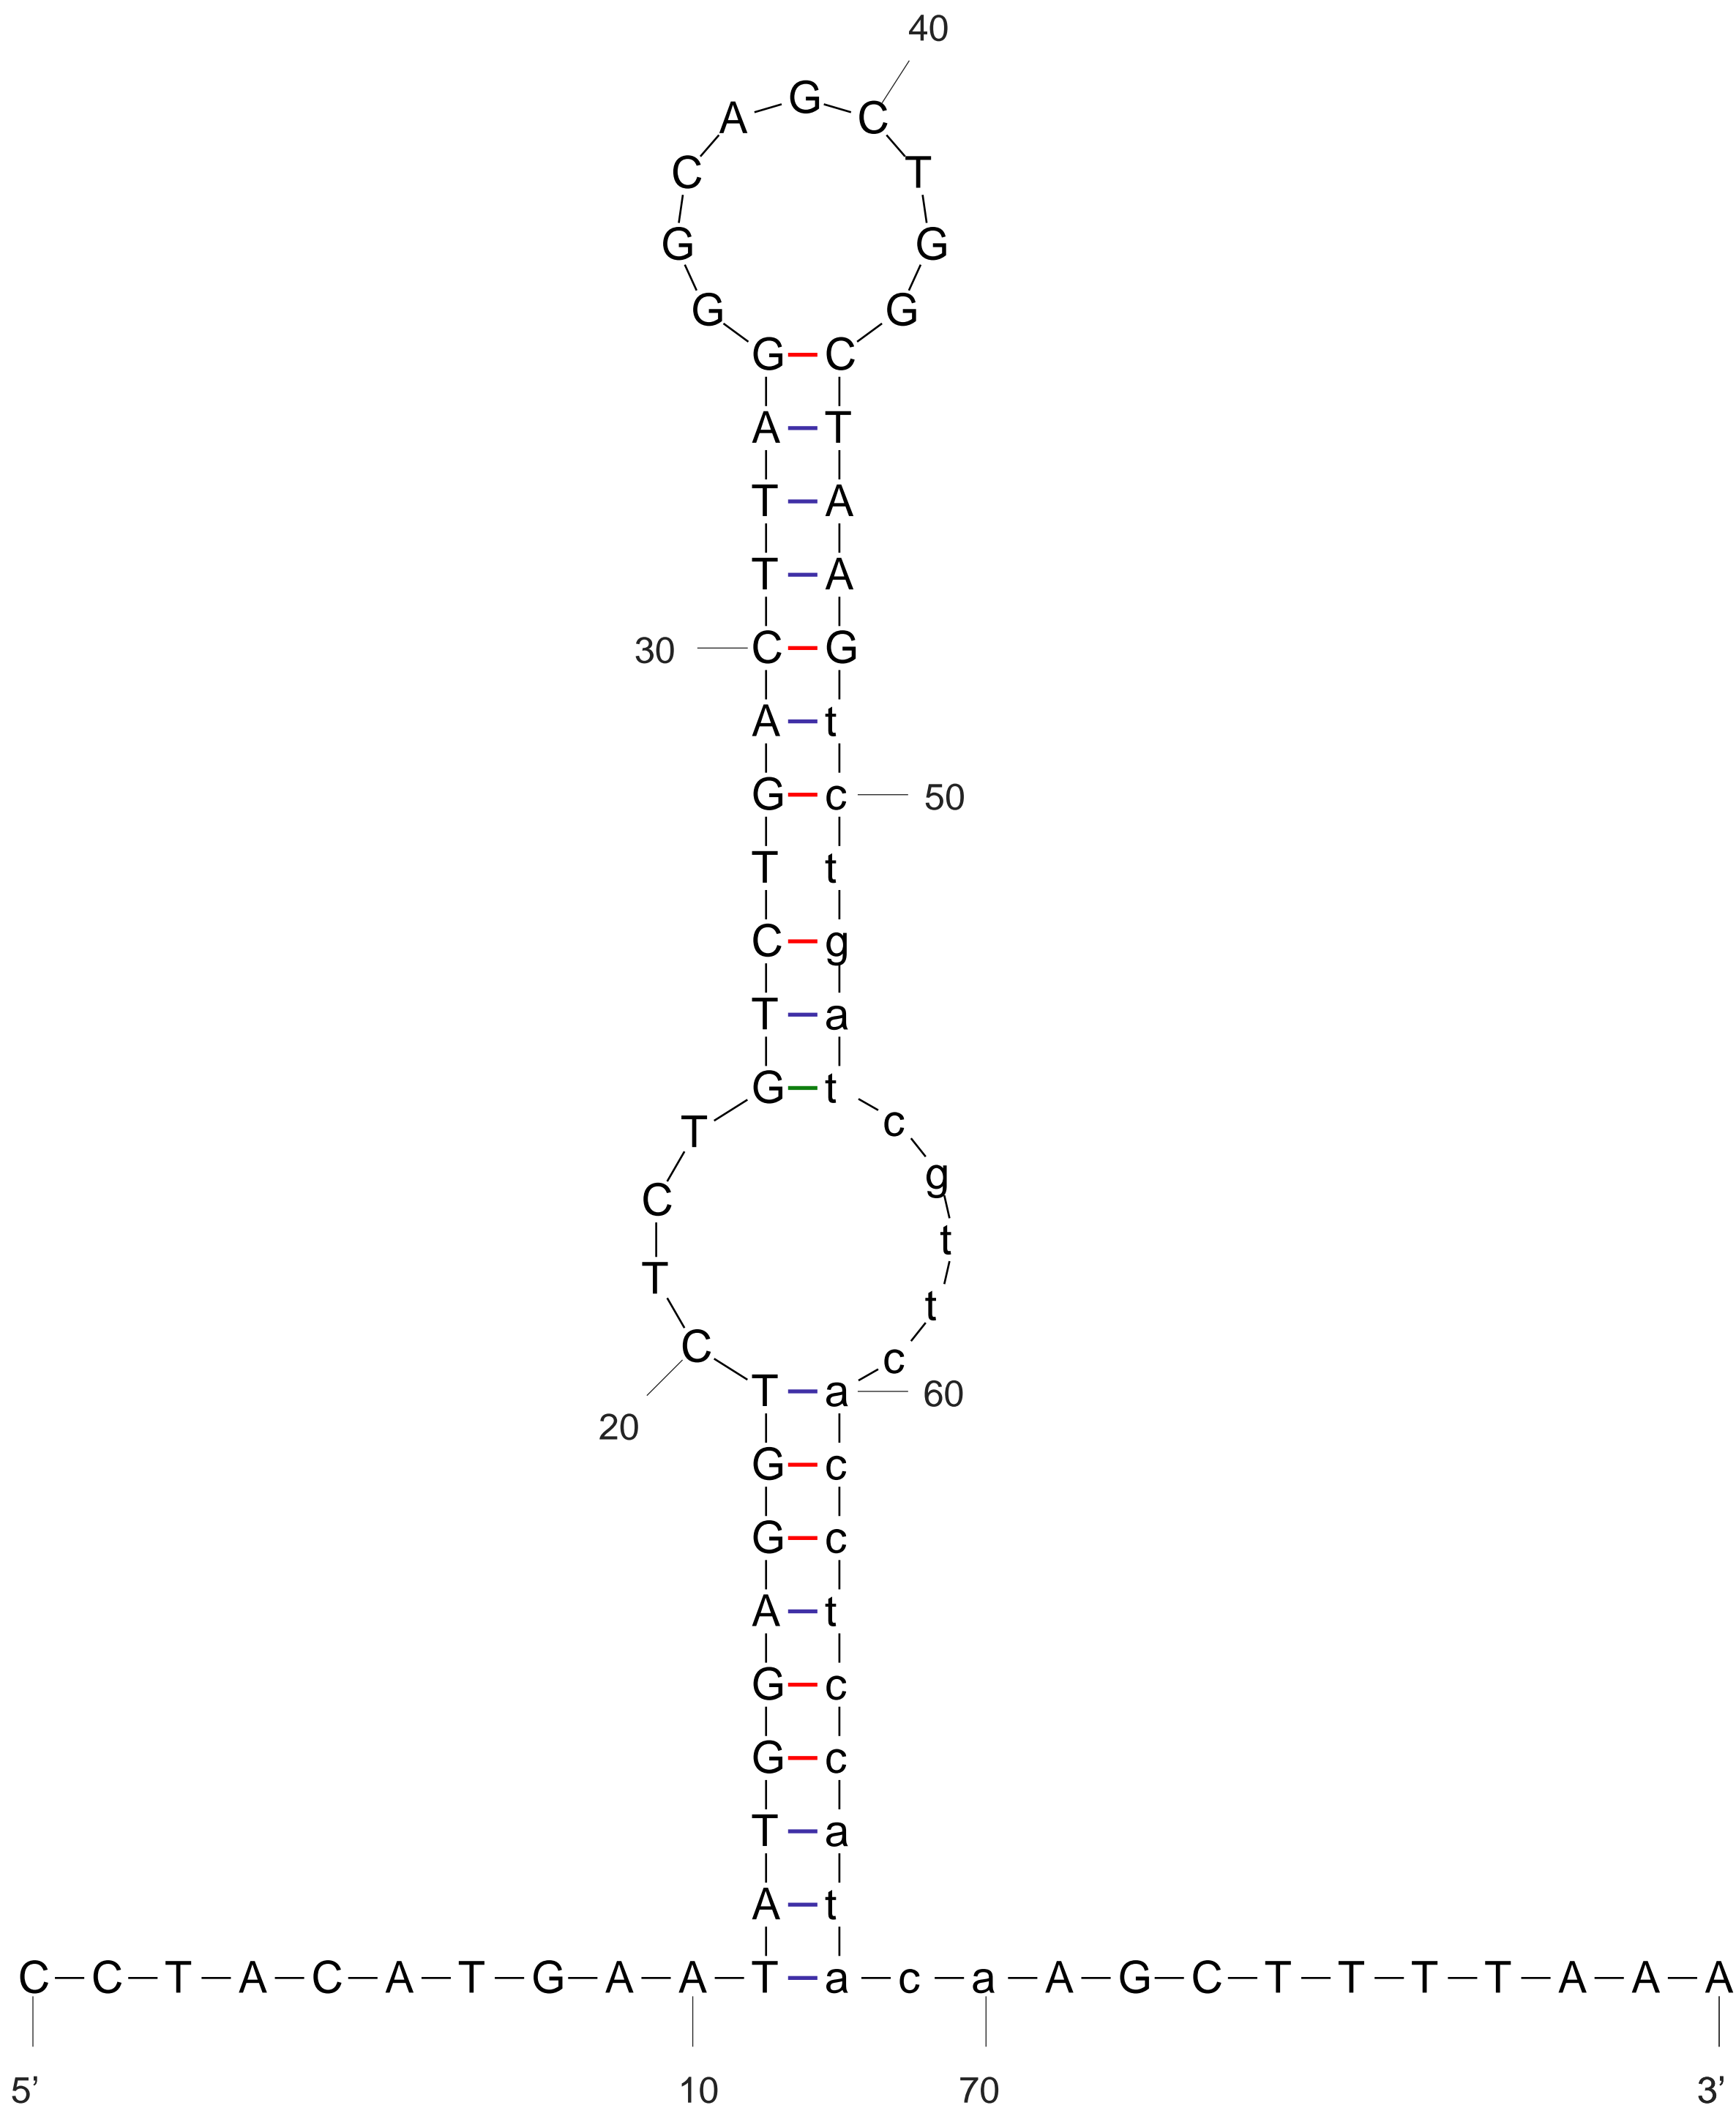

dG = -23 cgr-mir-1843

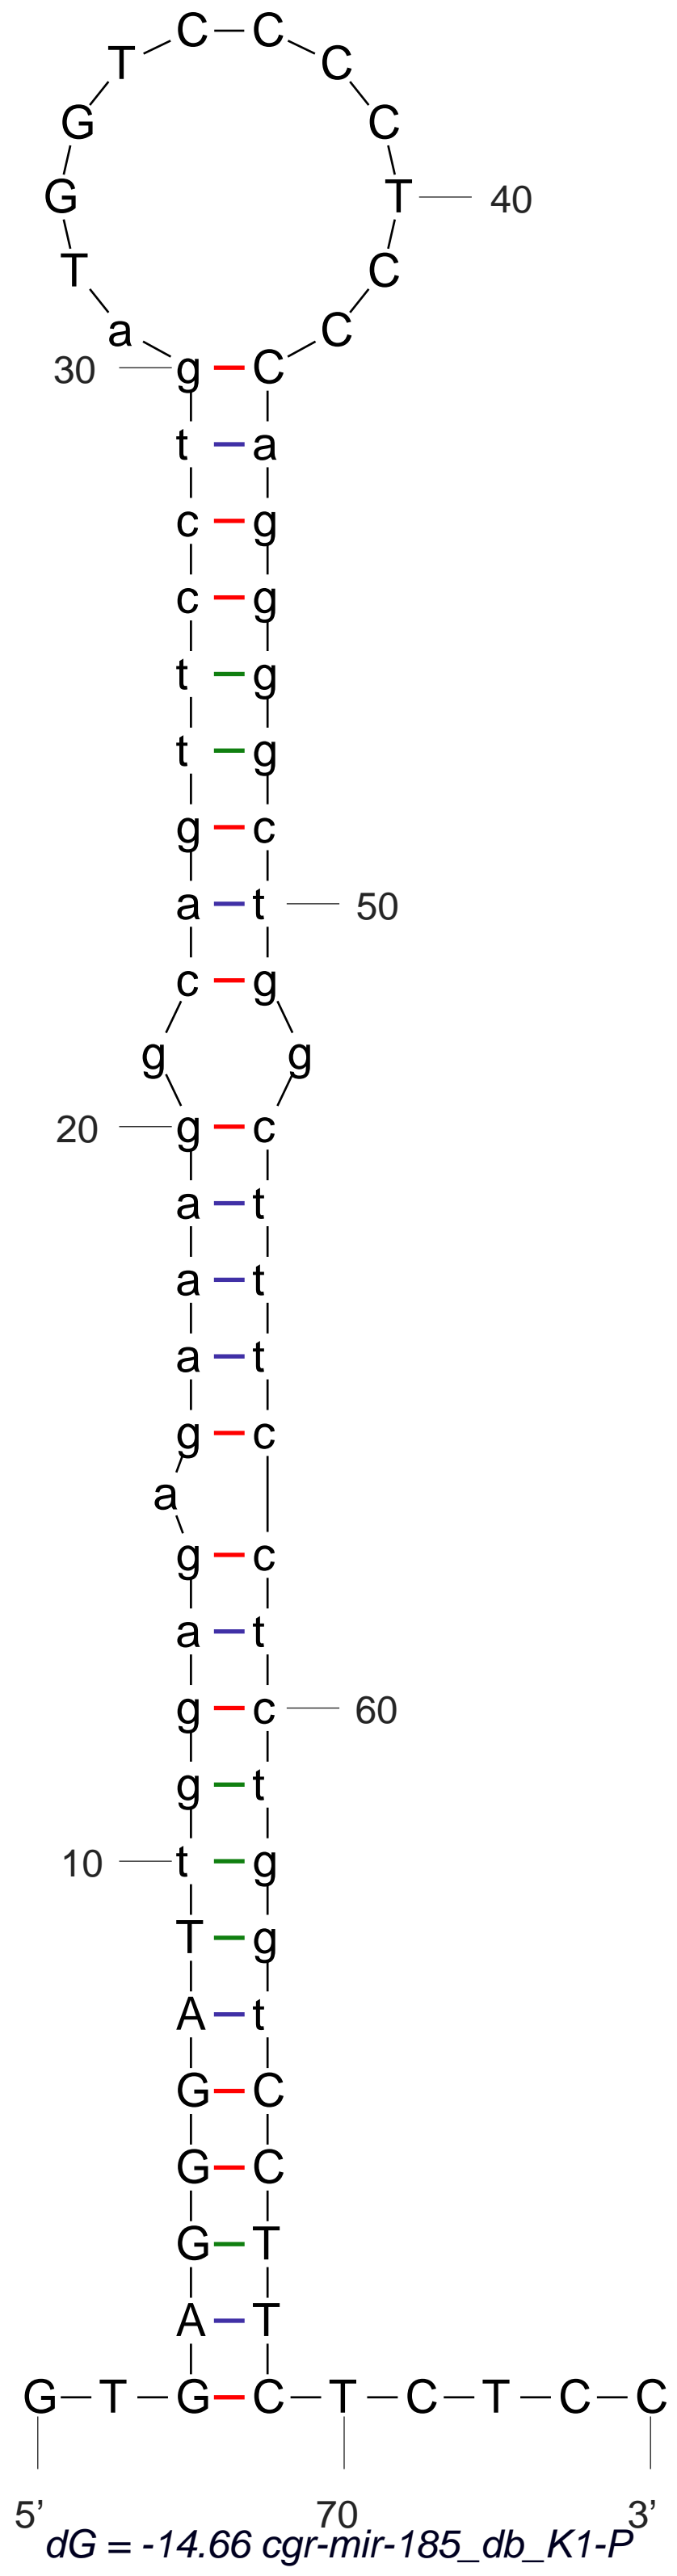

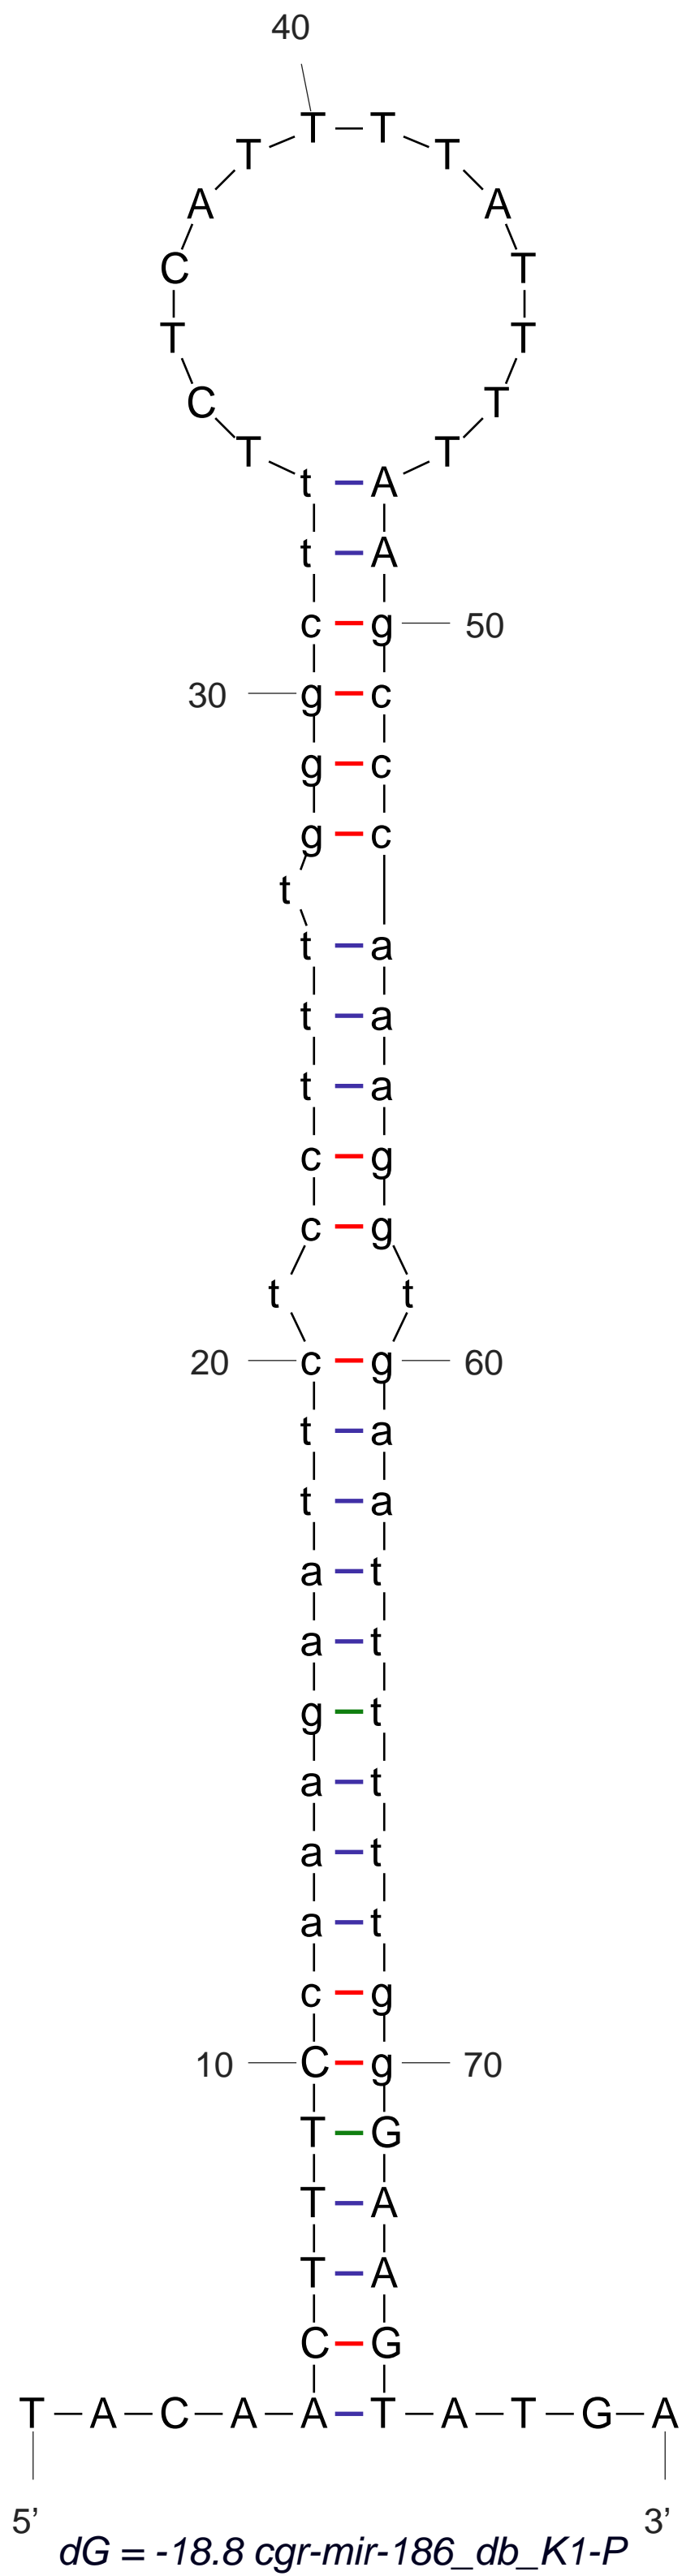

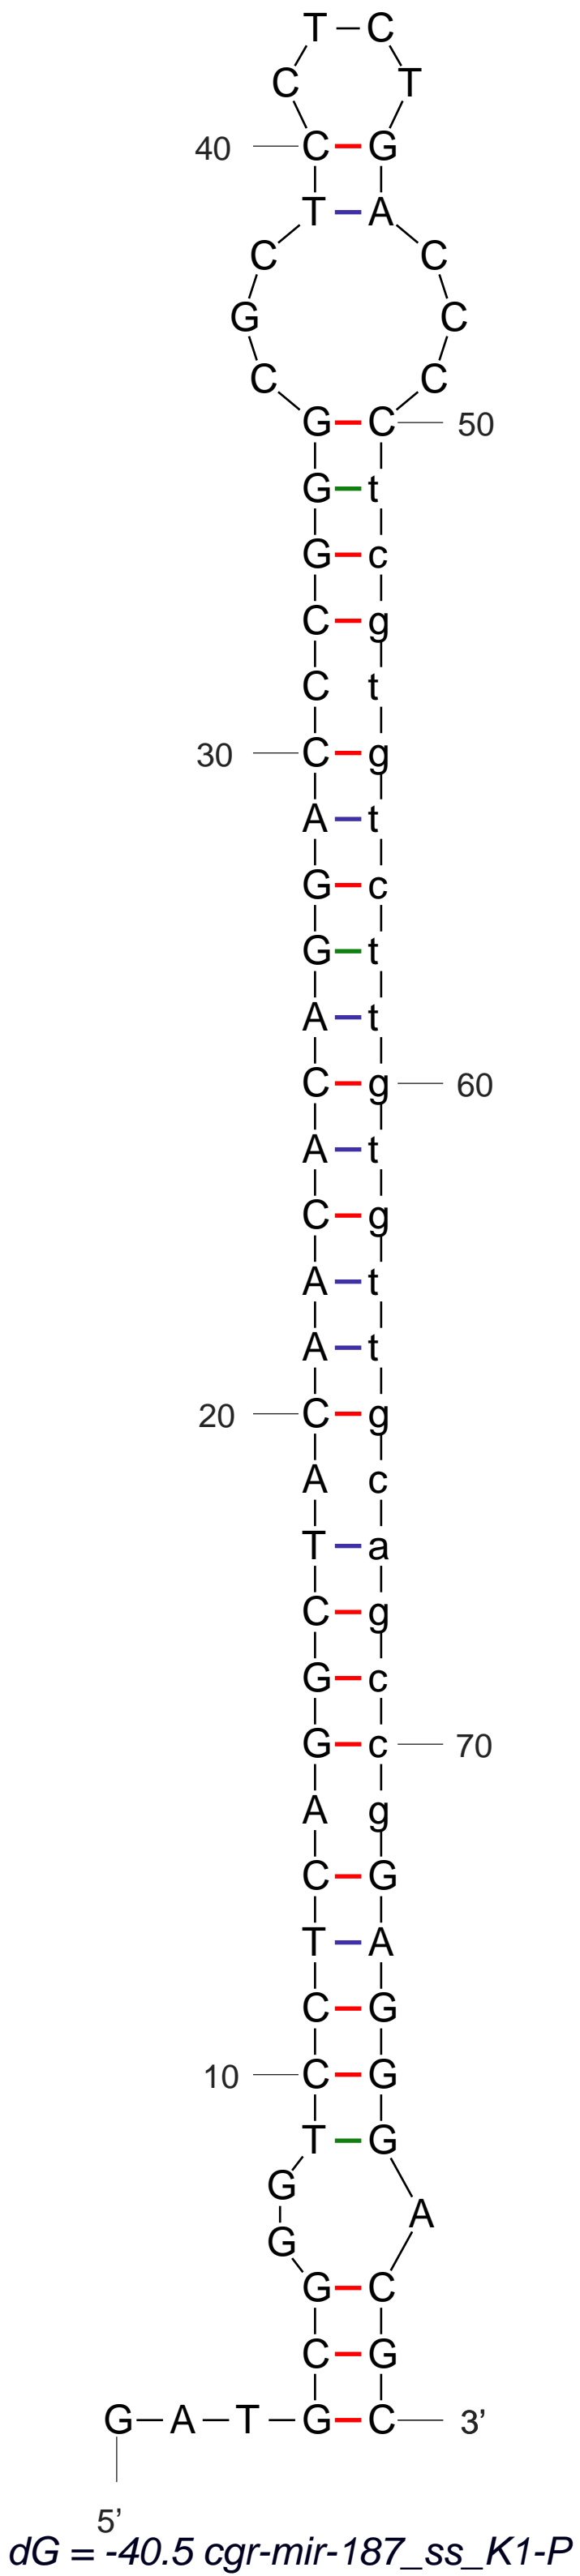

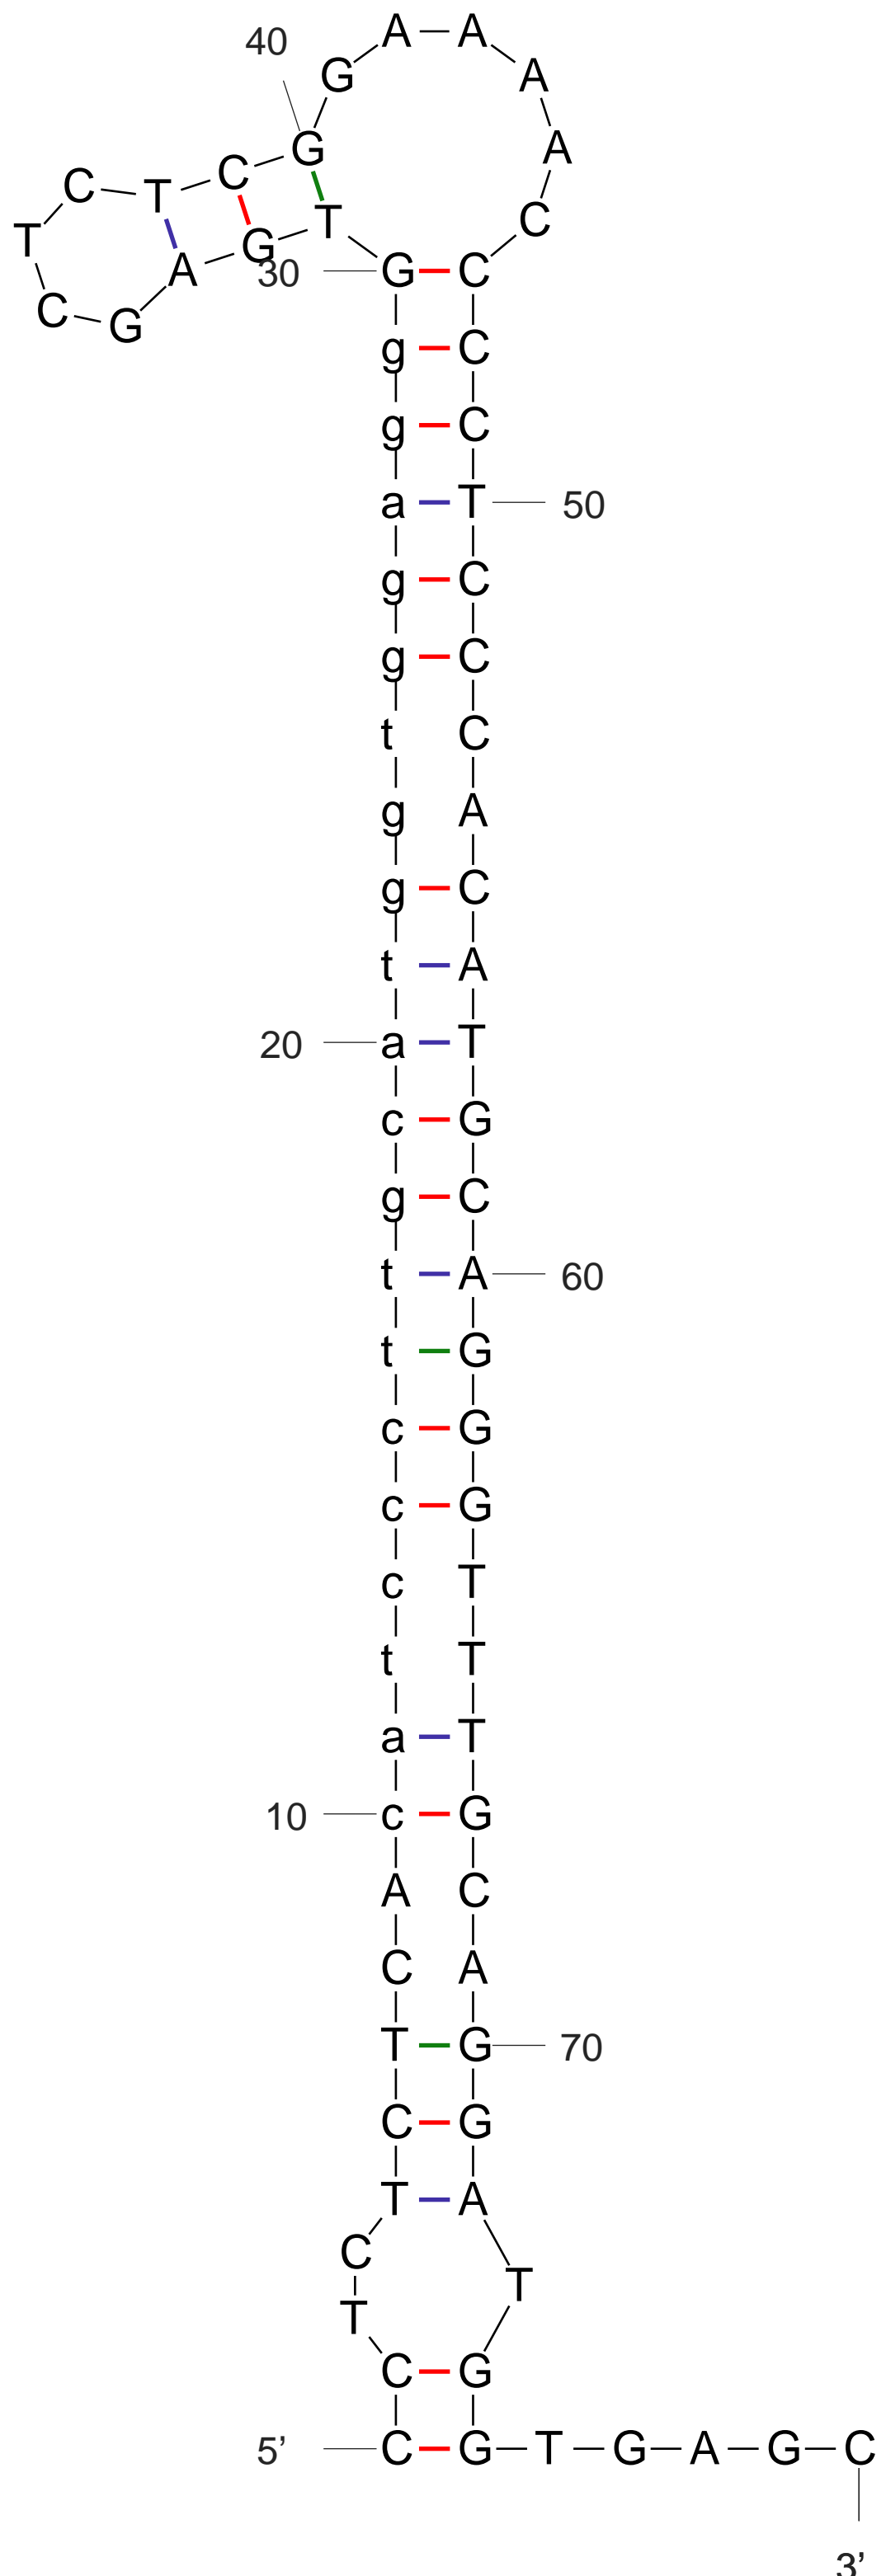

dG = -32.1 cgr-mir-188\_ss\_K1-P

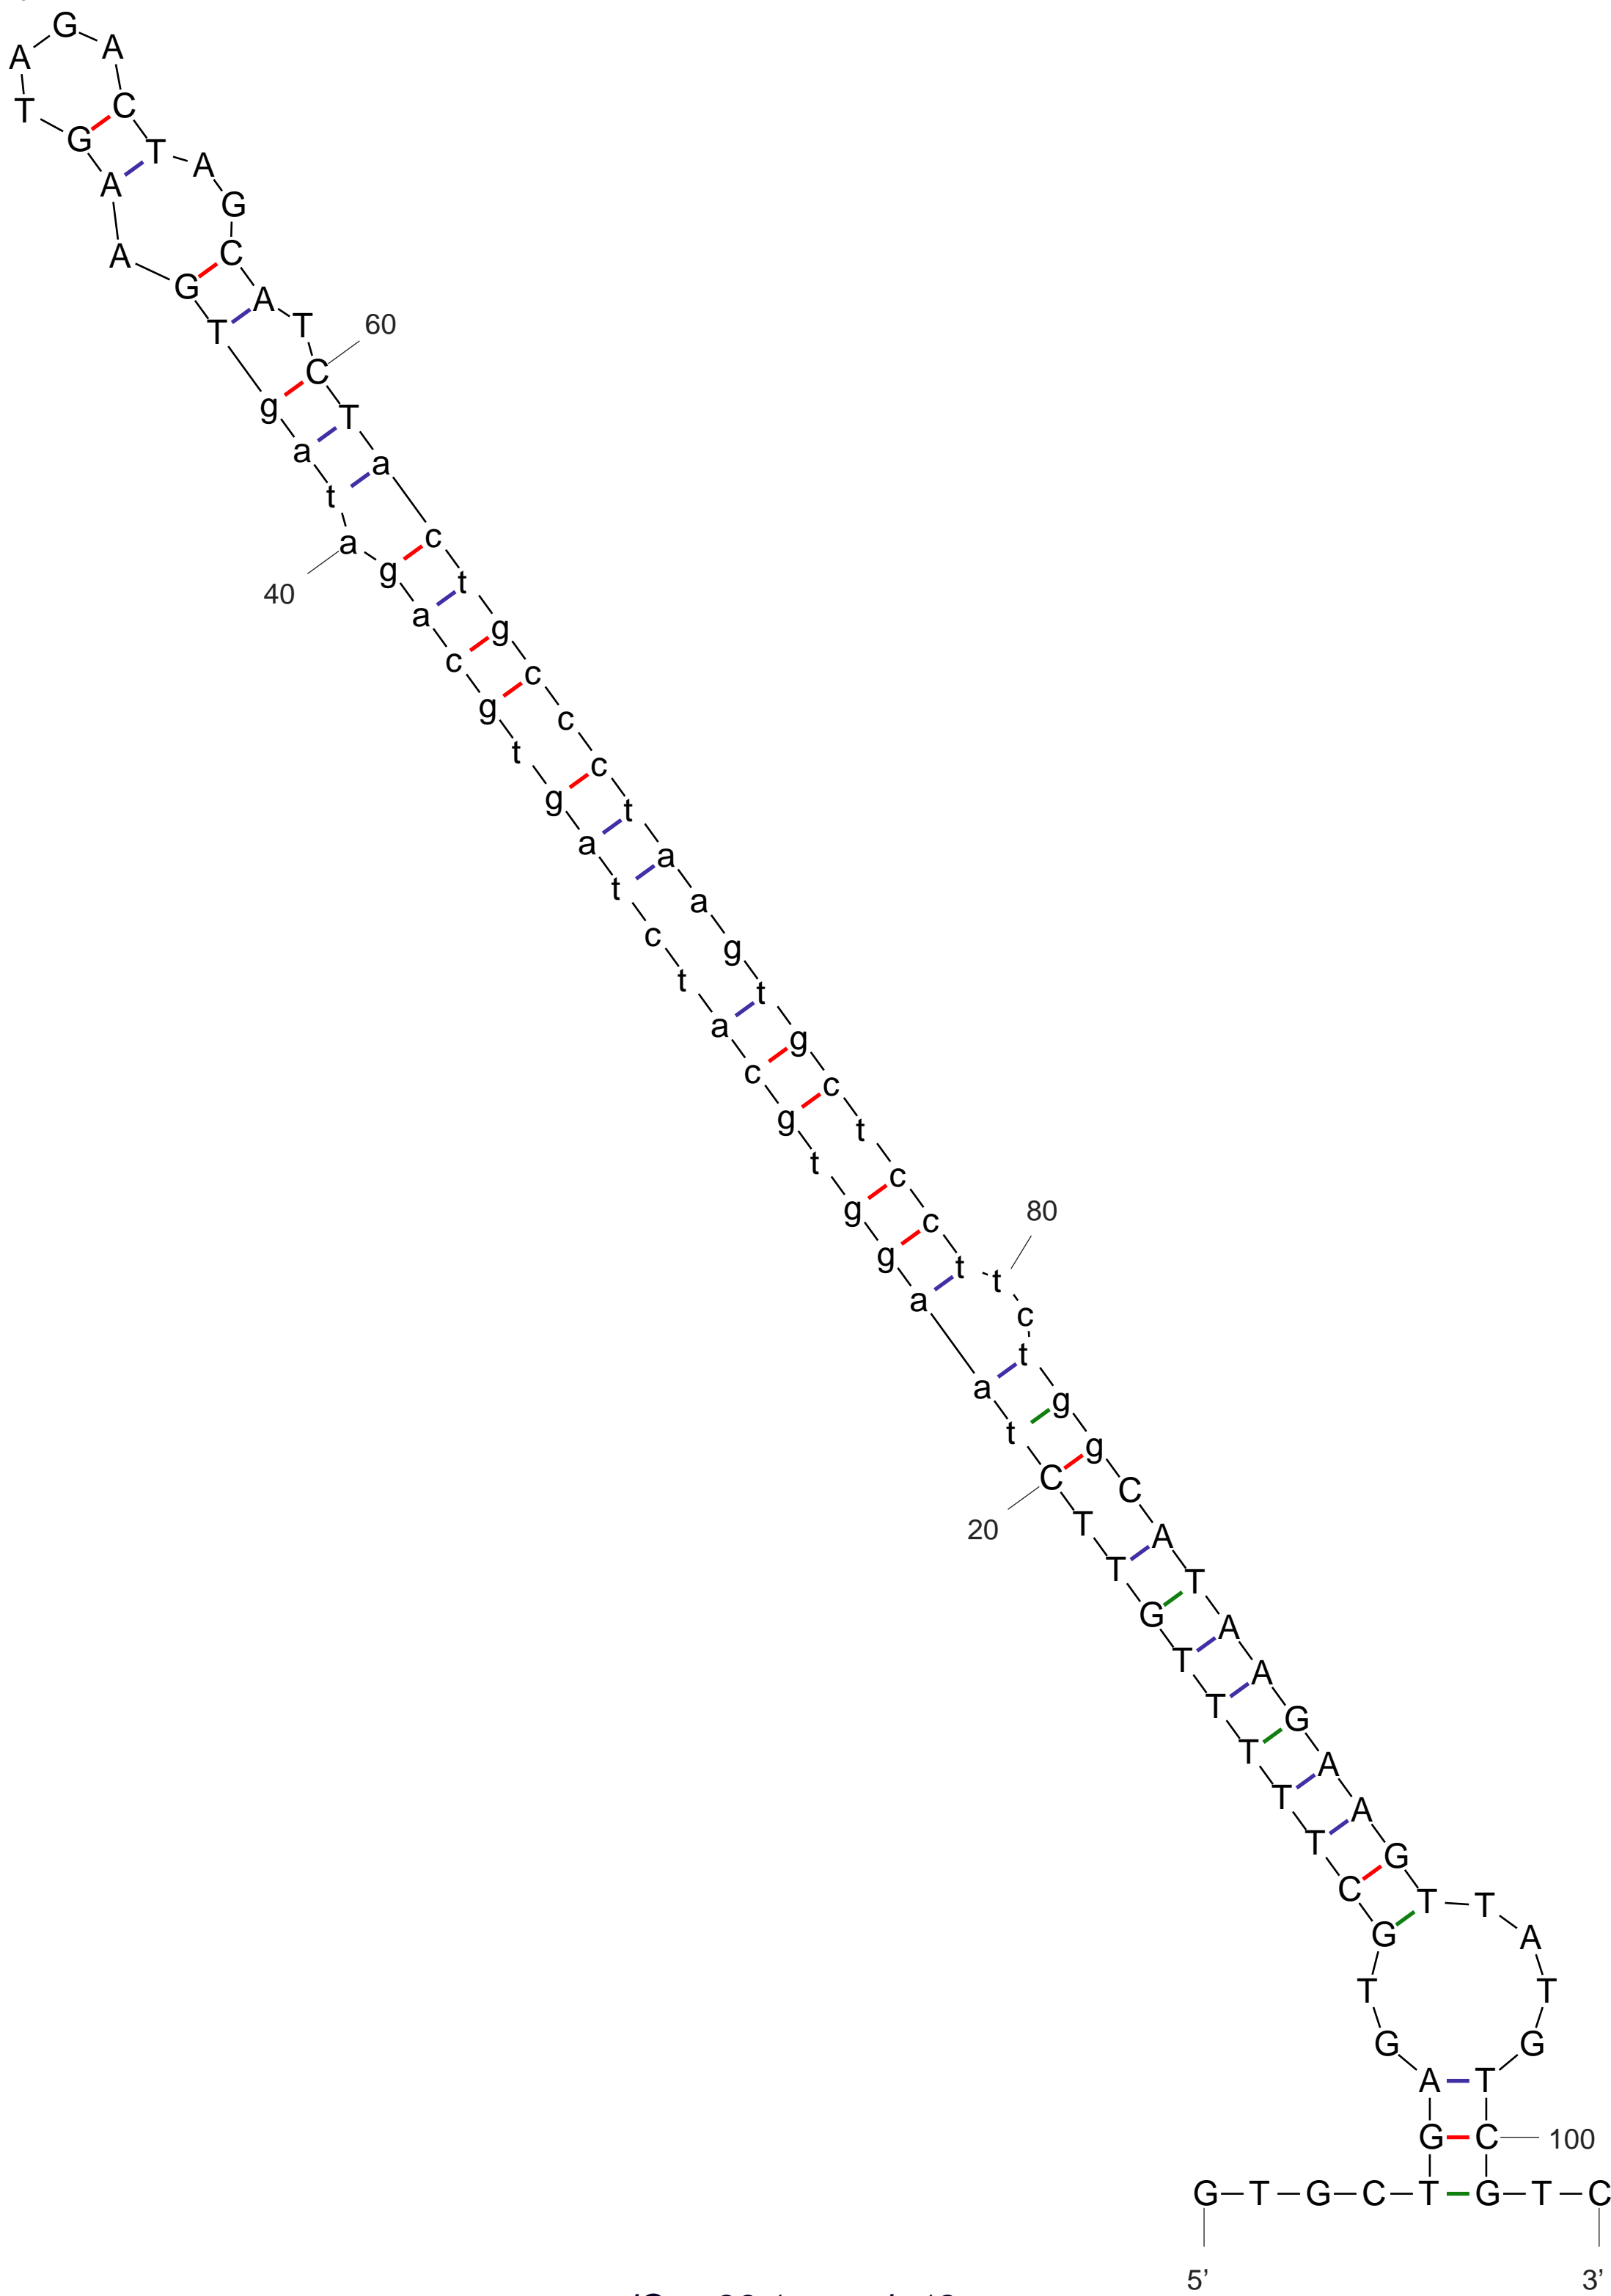

$dG = -29.1$  *cgr-mir-18a*

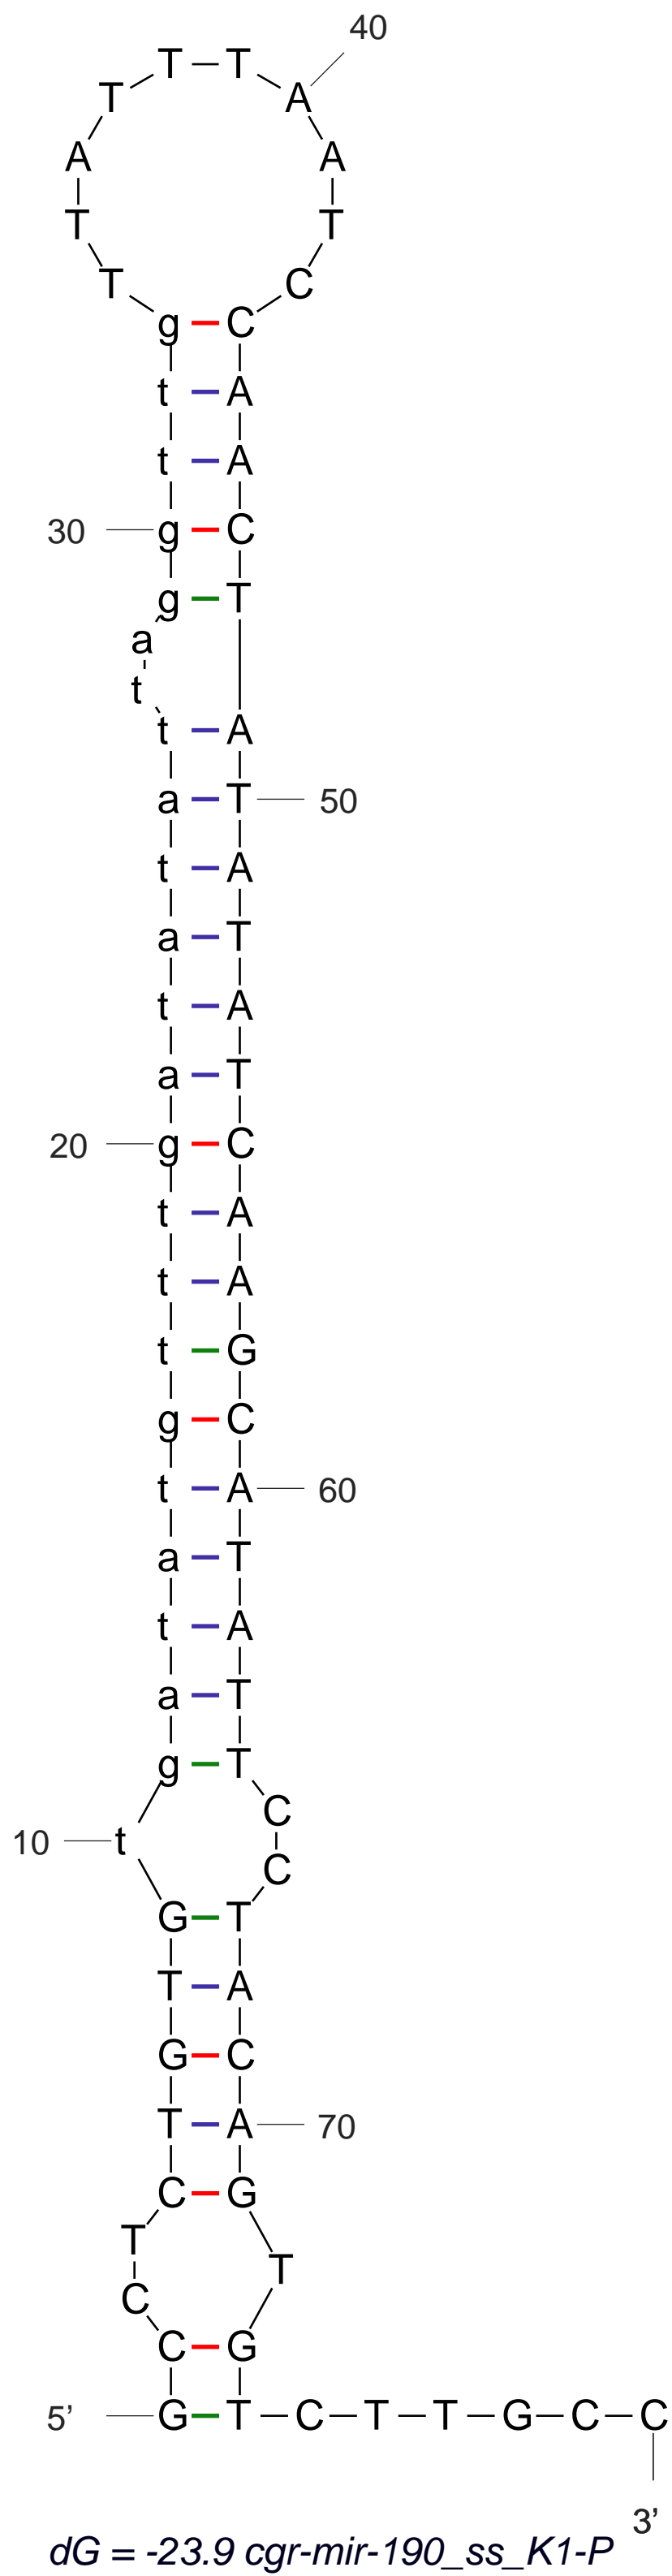



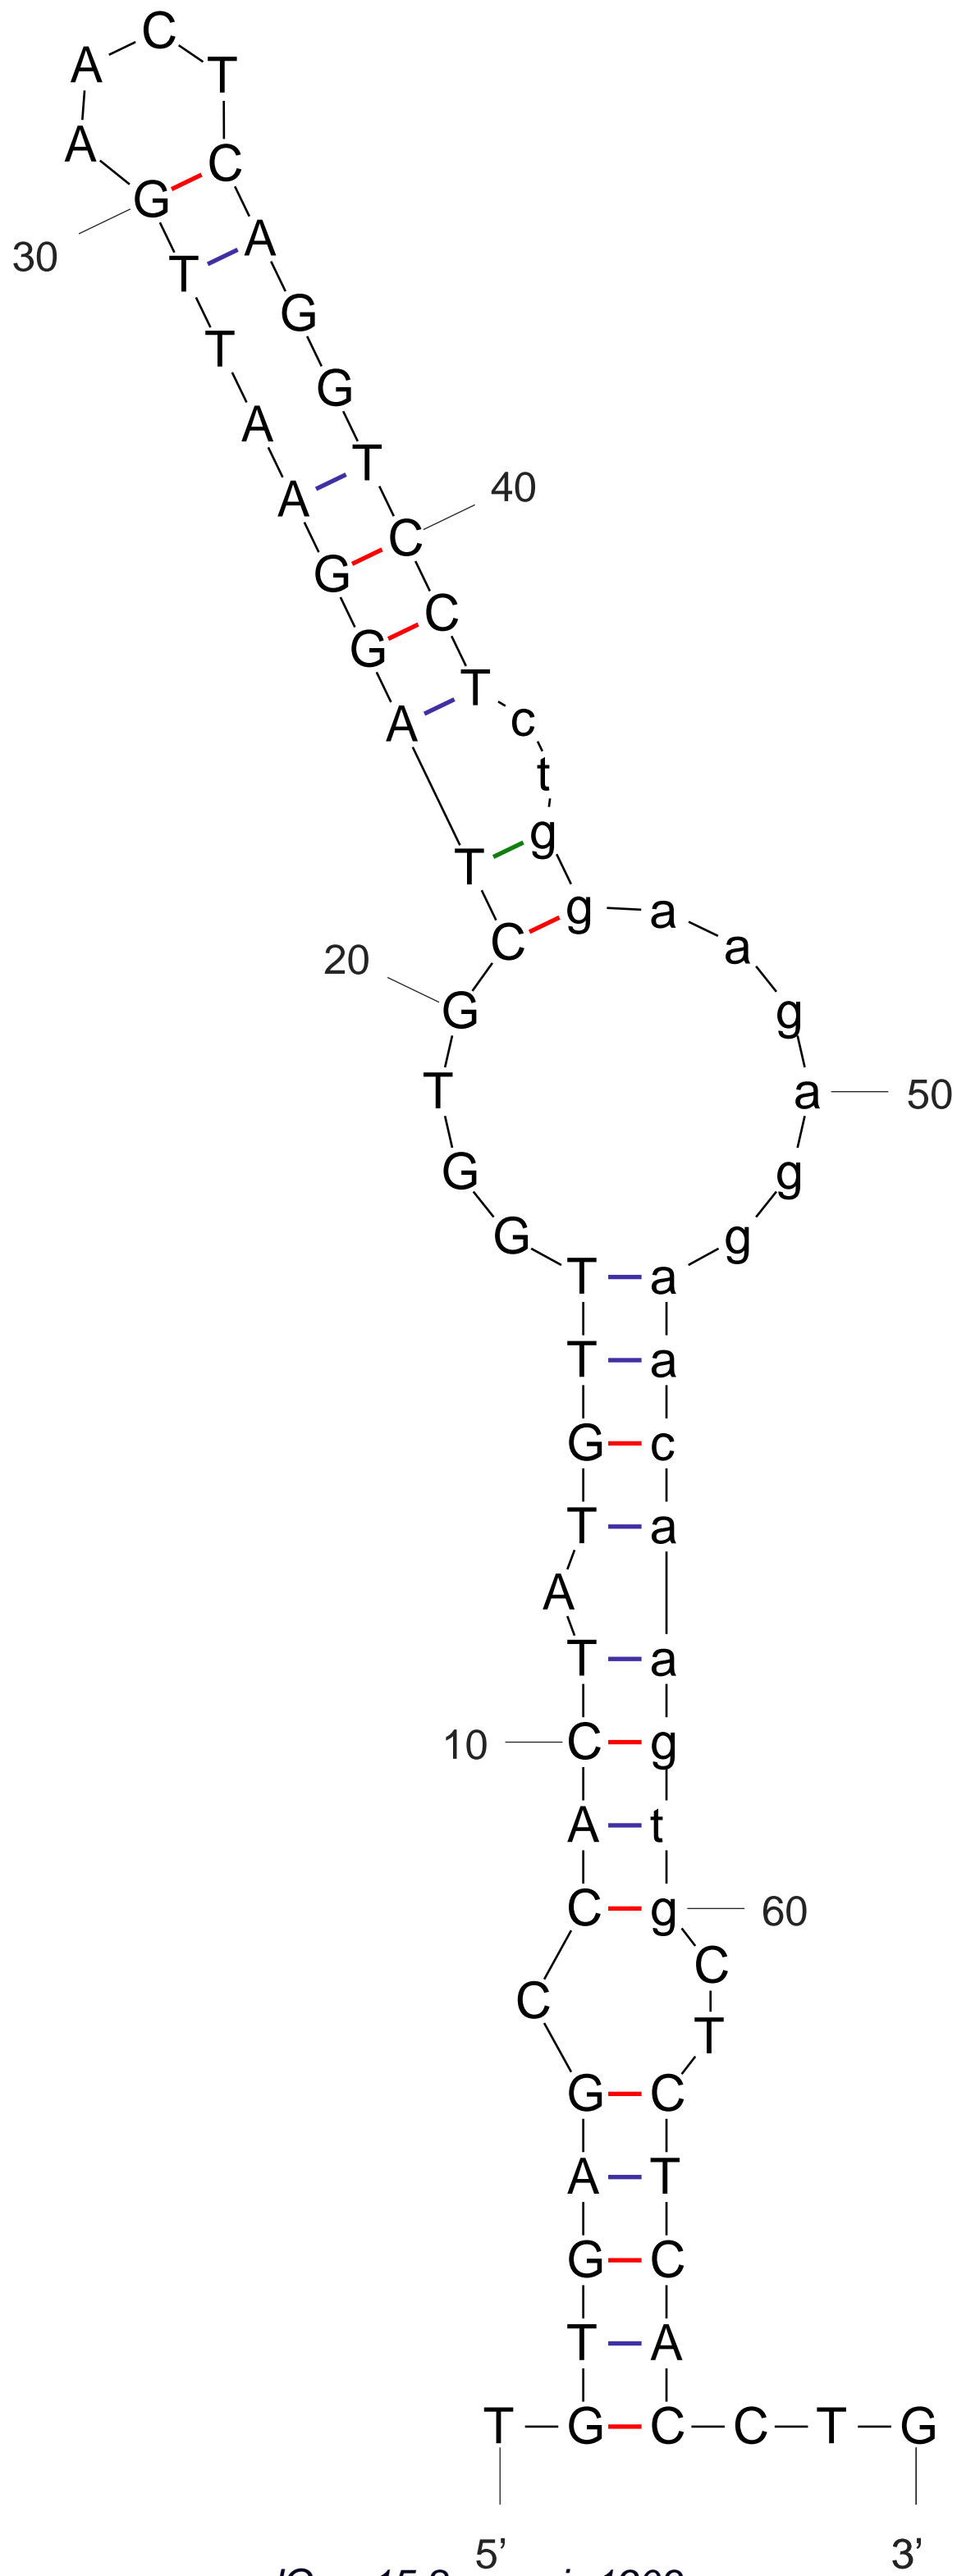

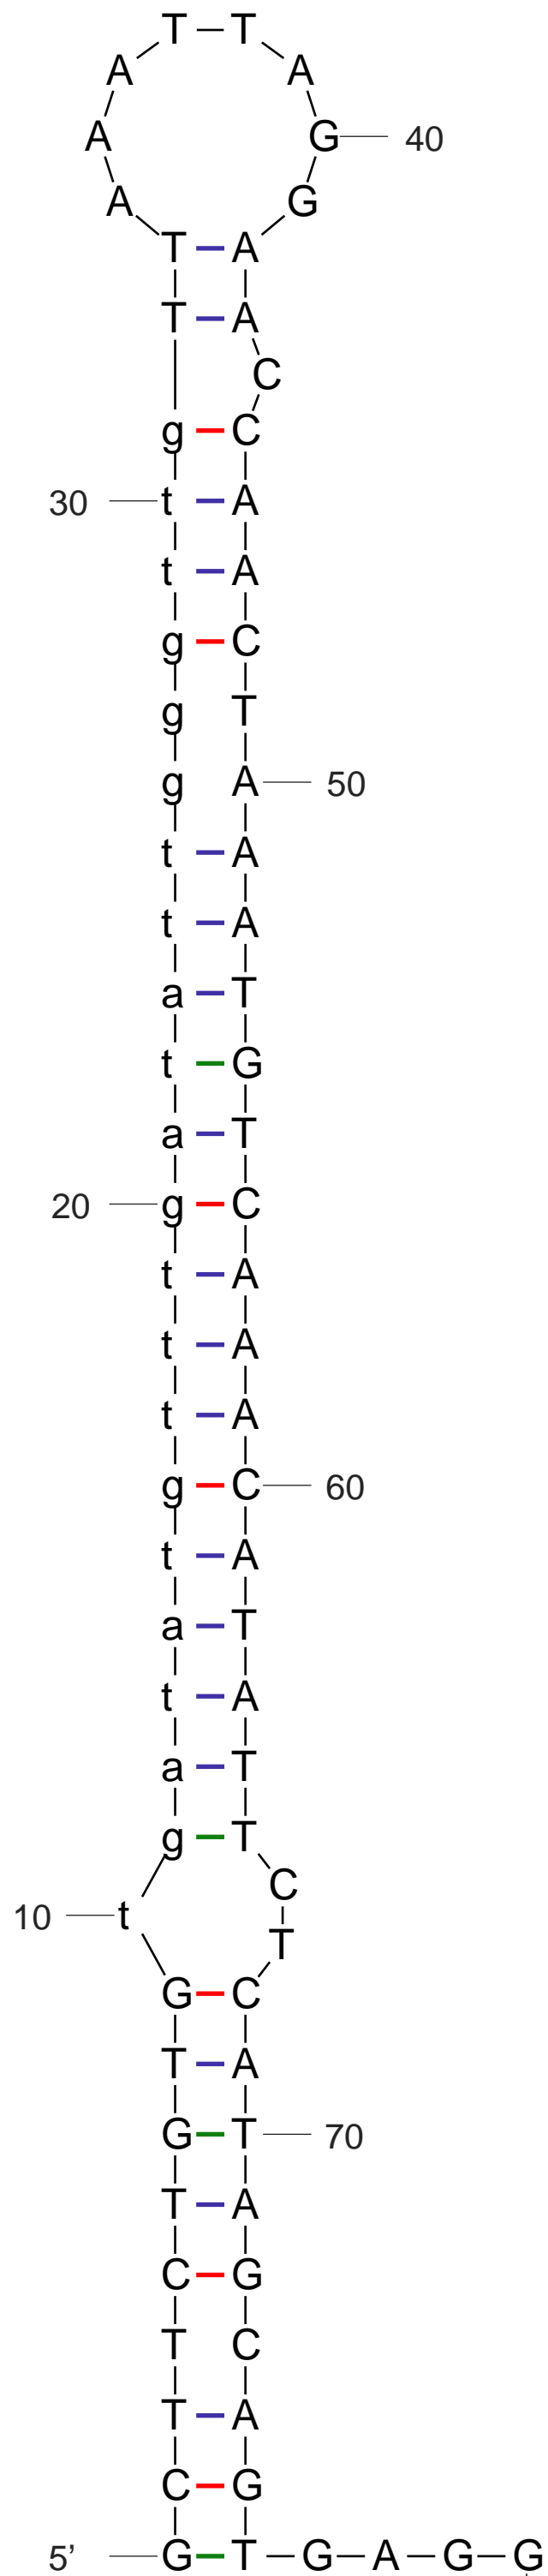

dG = -27.4 *cgr-mir-190b\_ss\_K1-P*

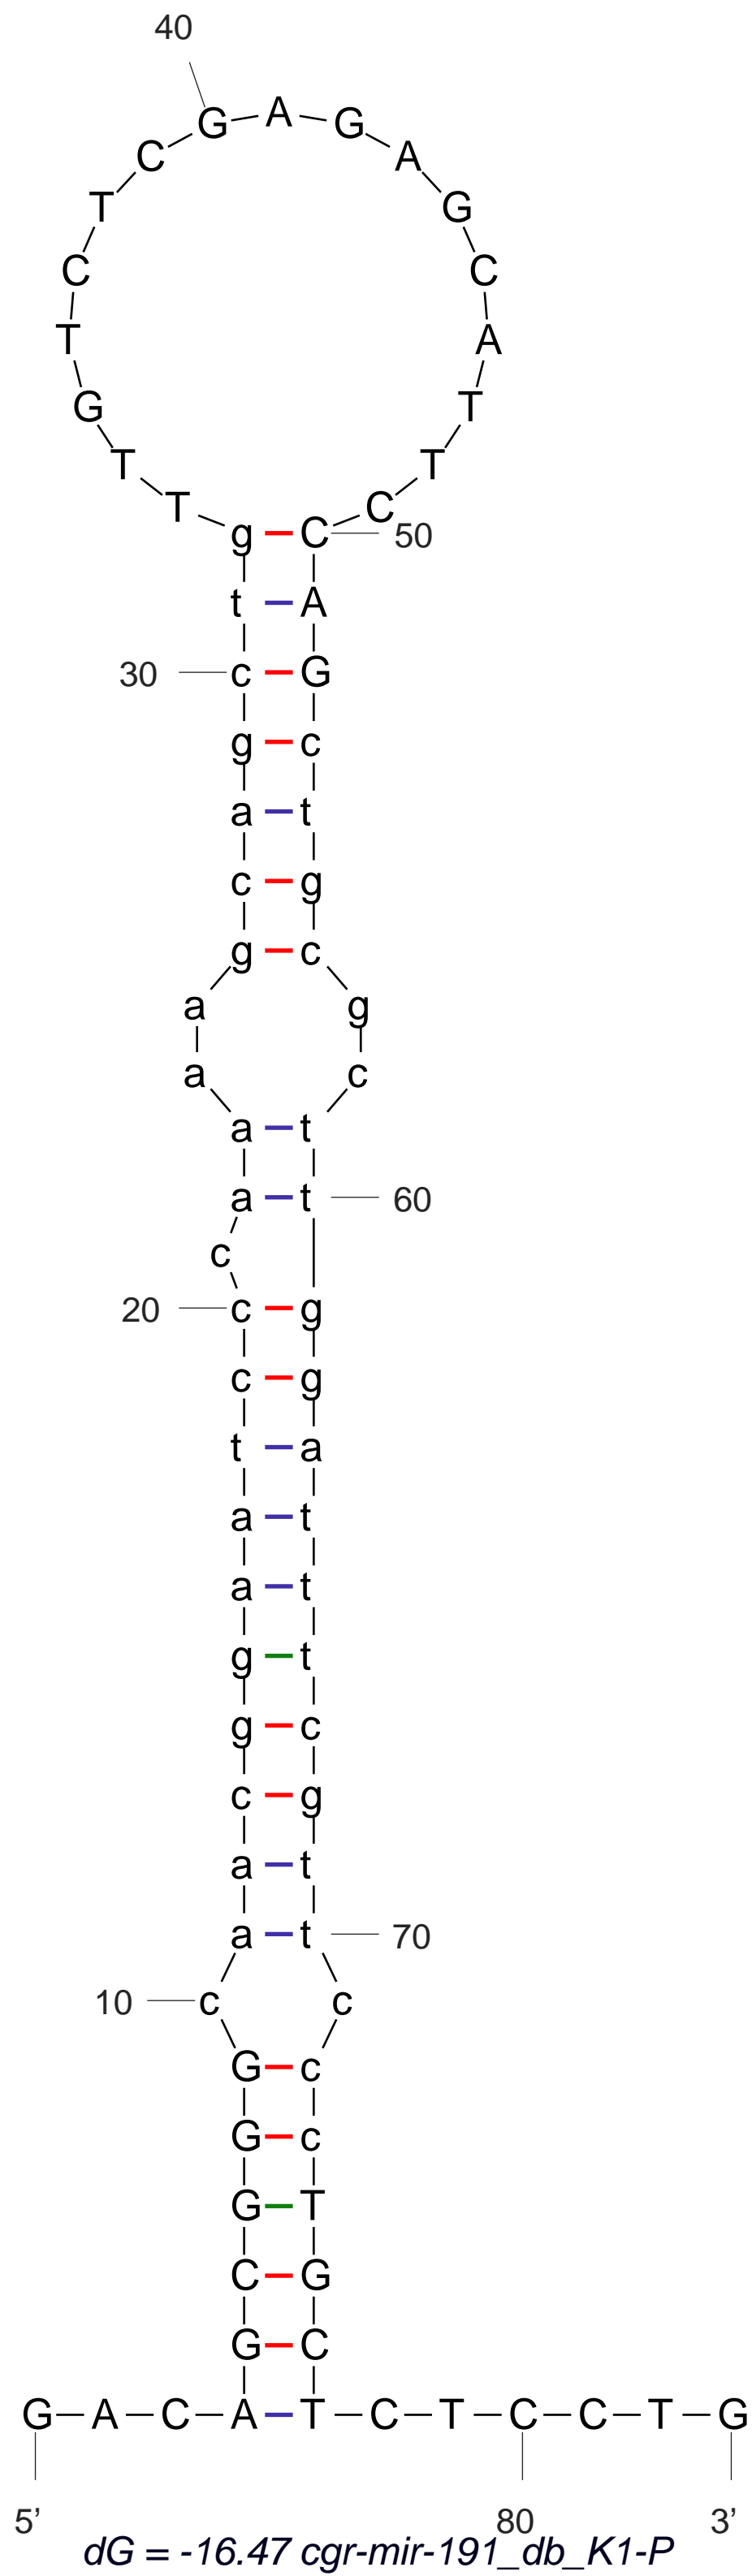

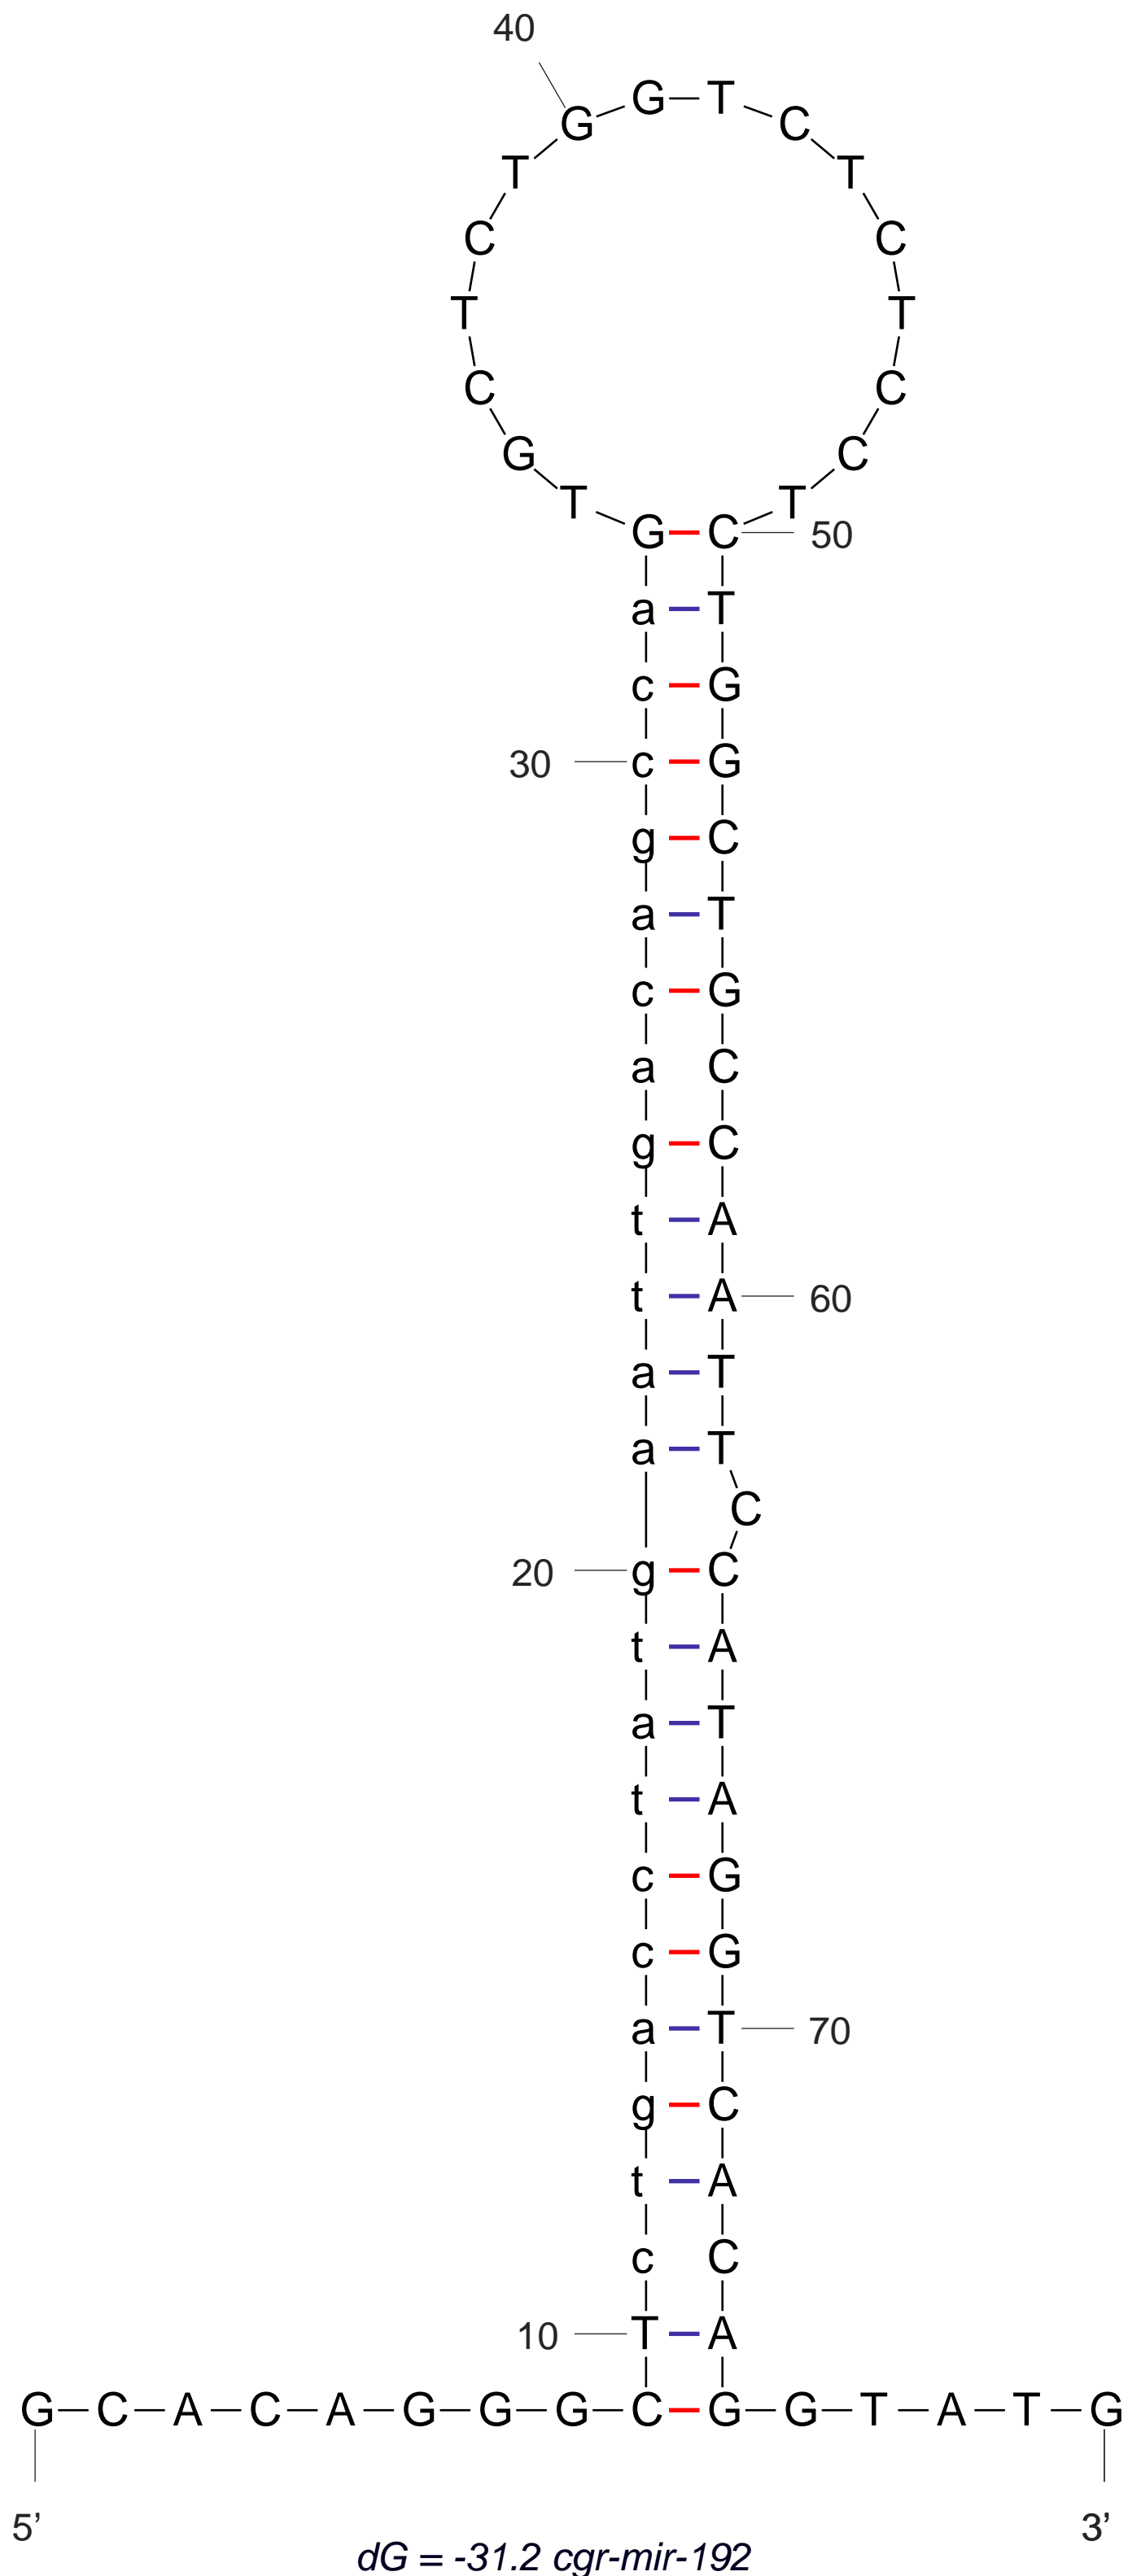

dG = -31.2 cgr-mir-192

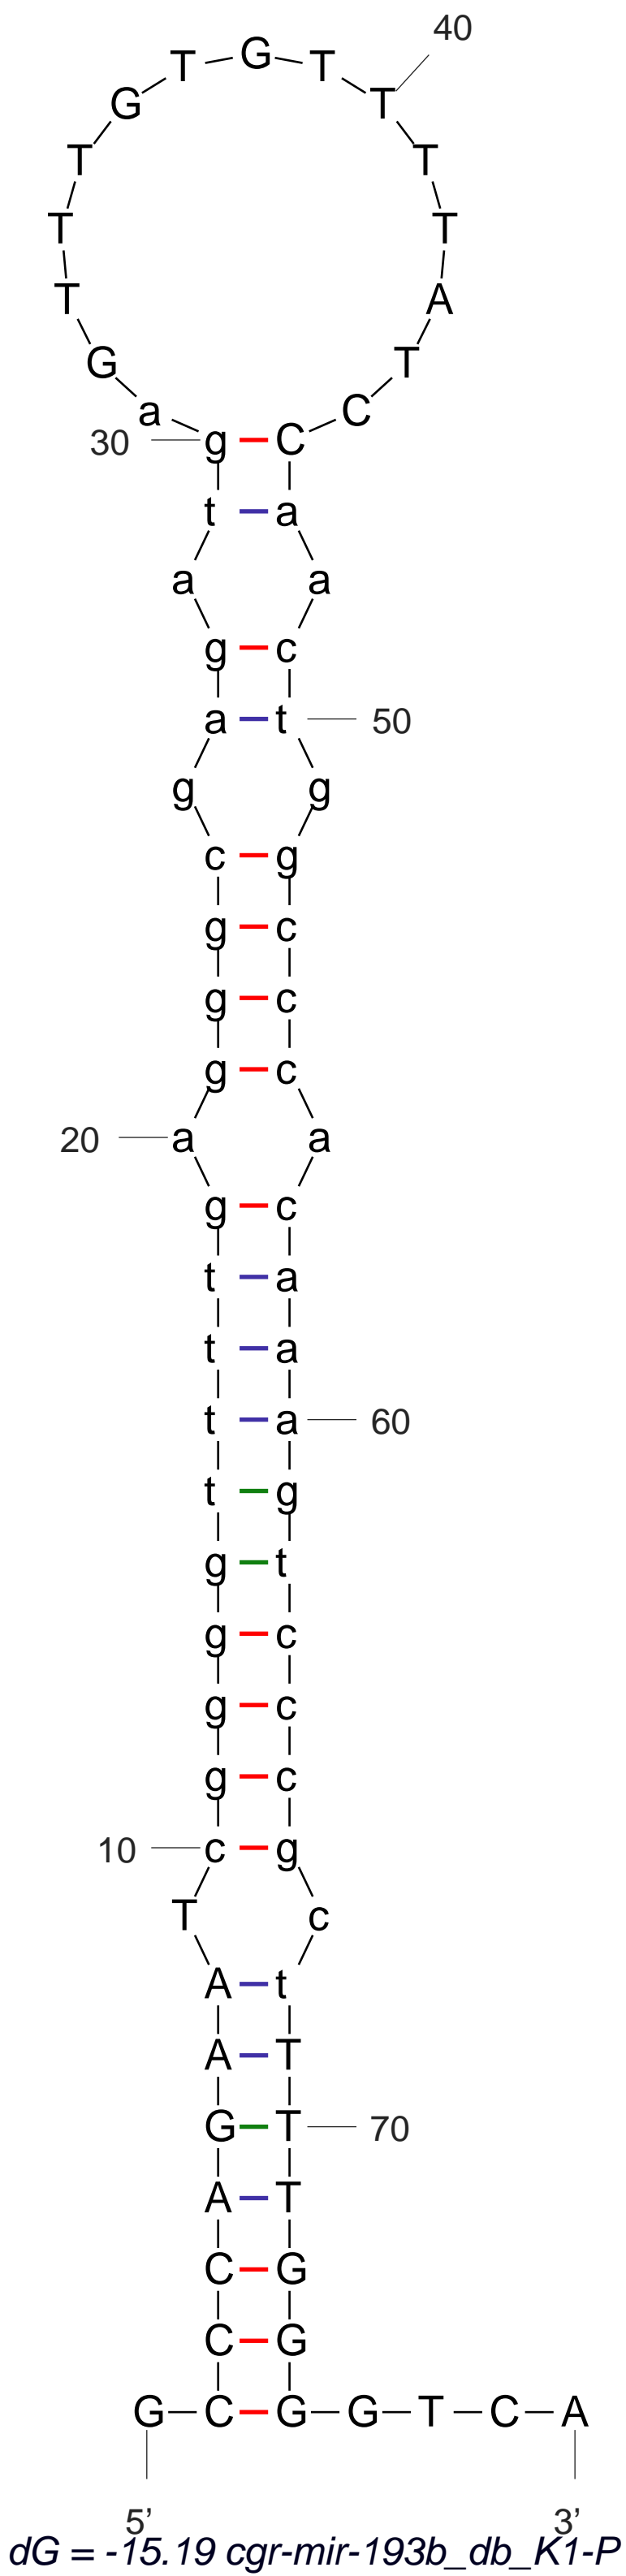

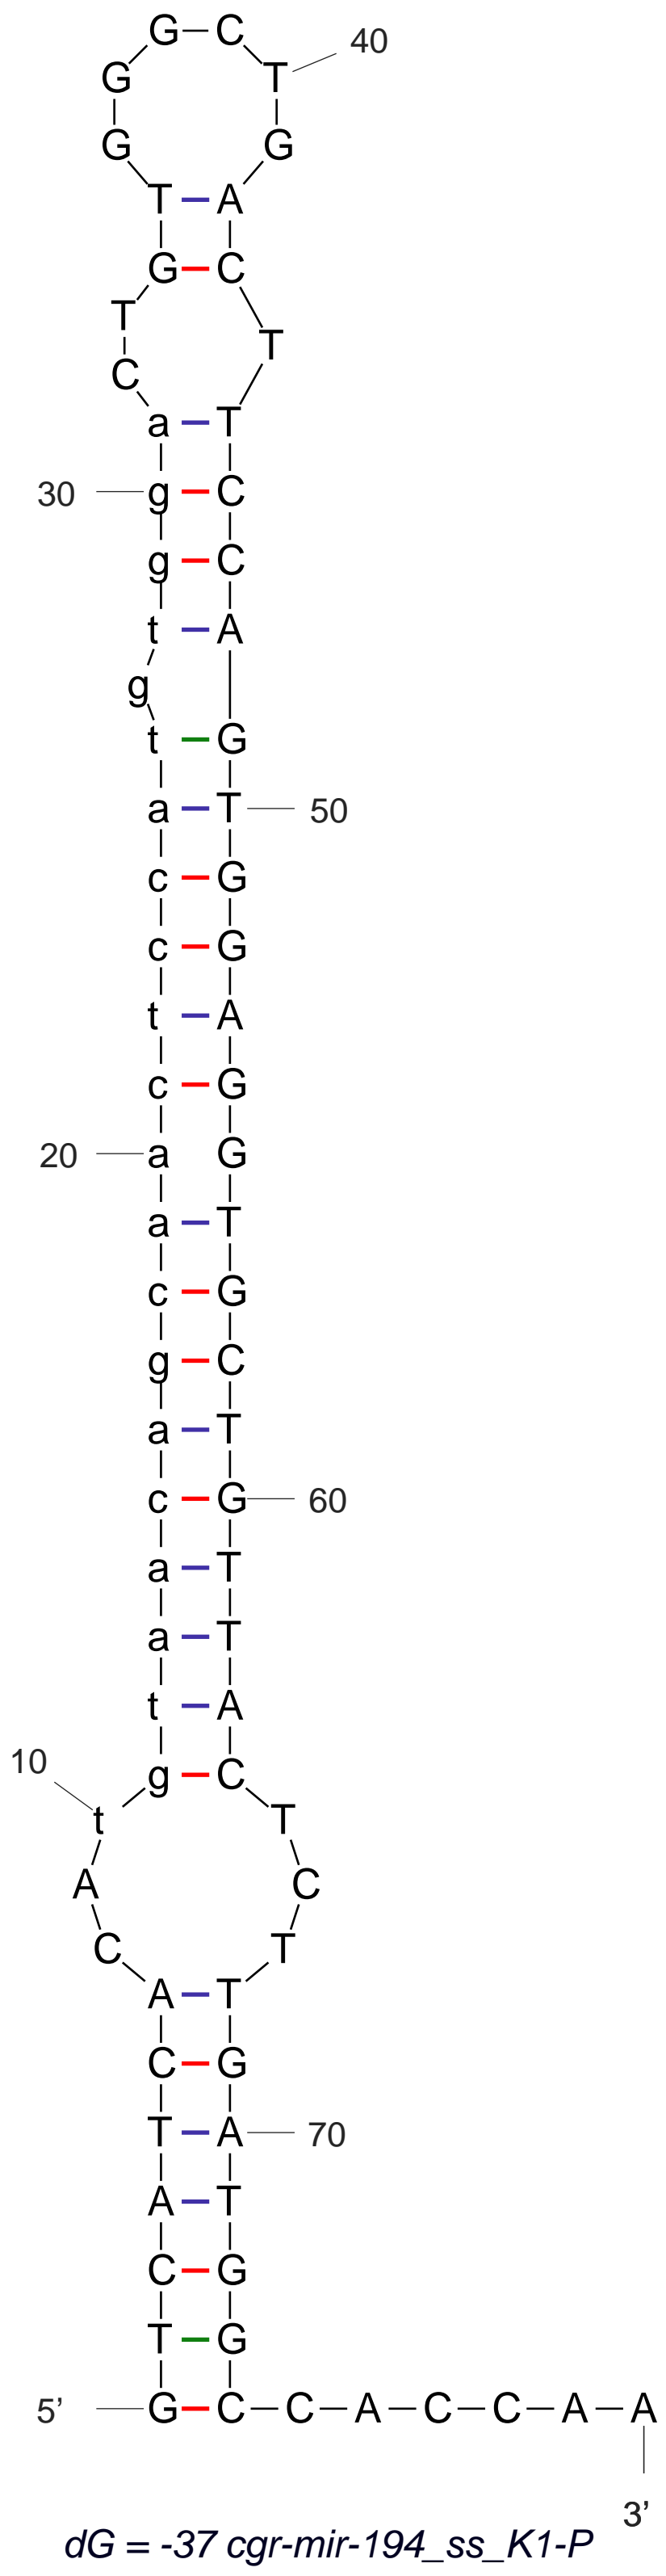

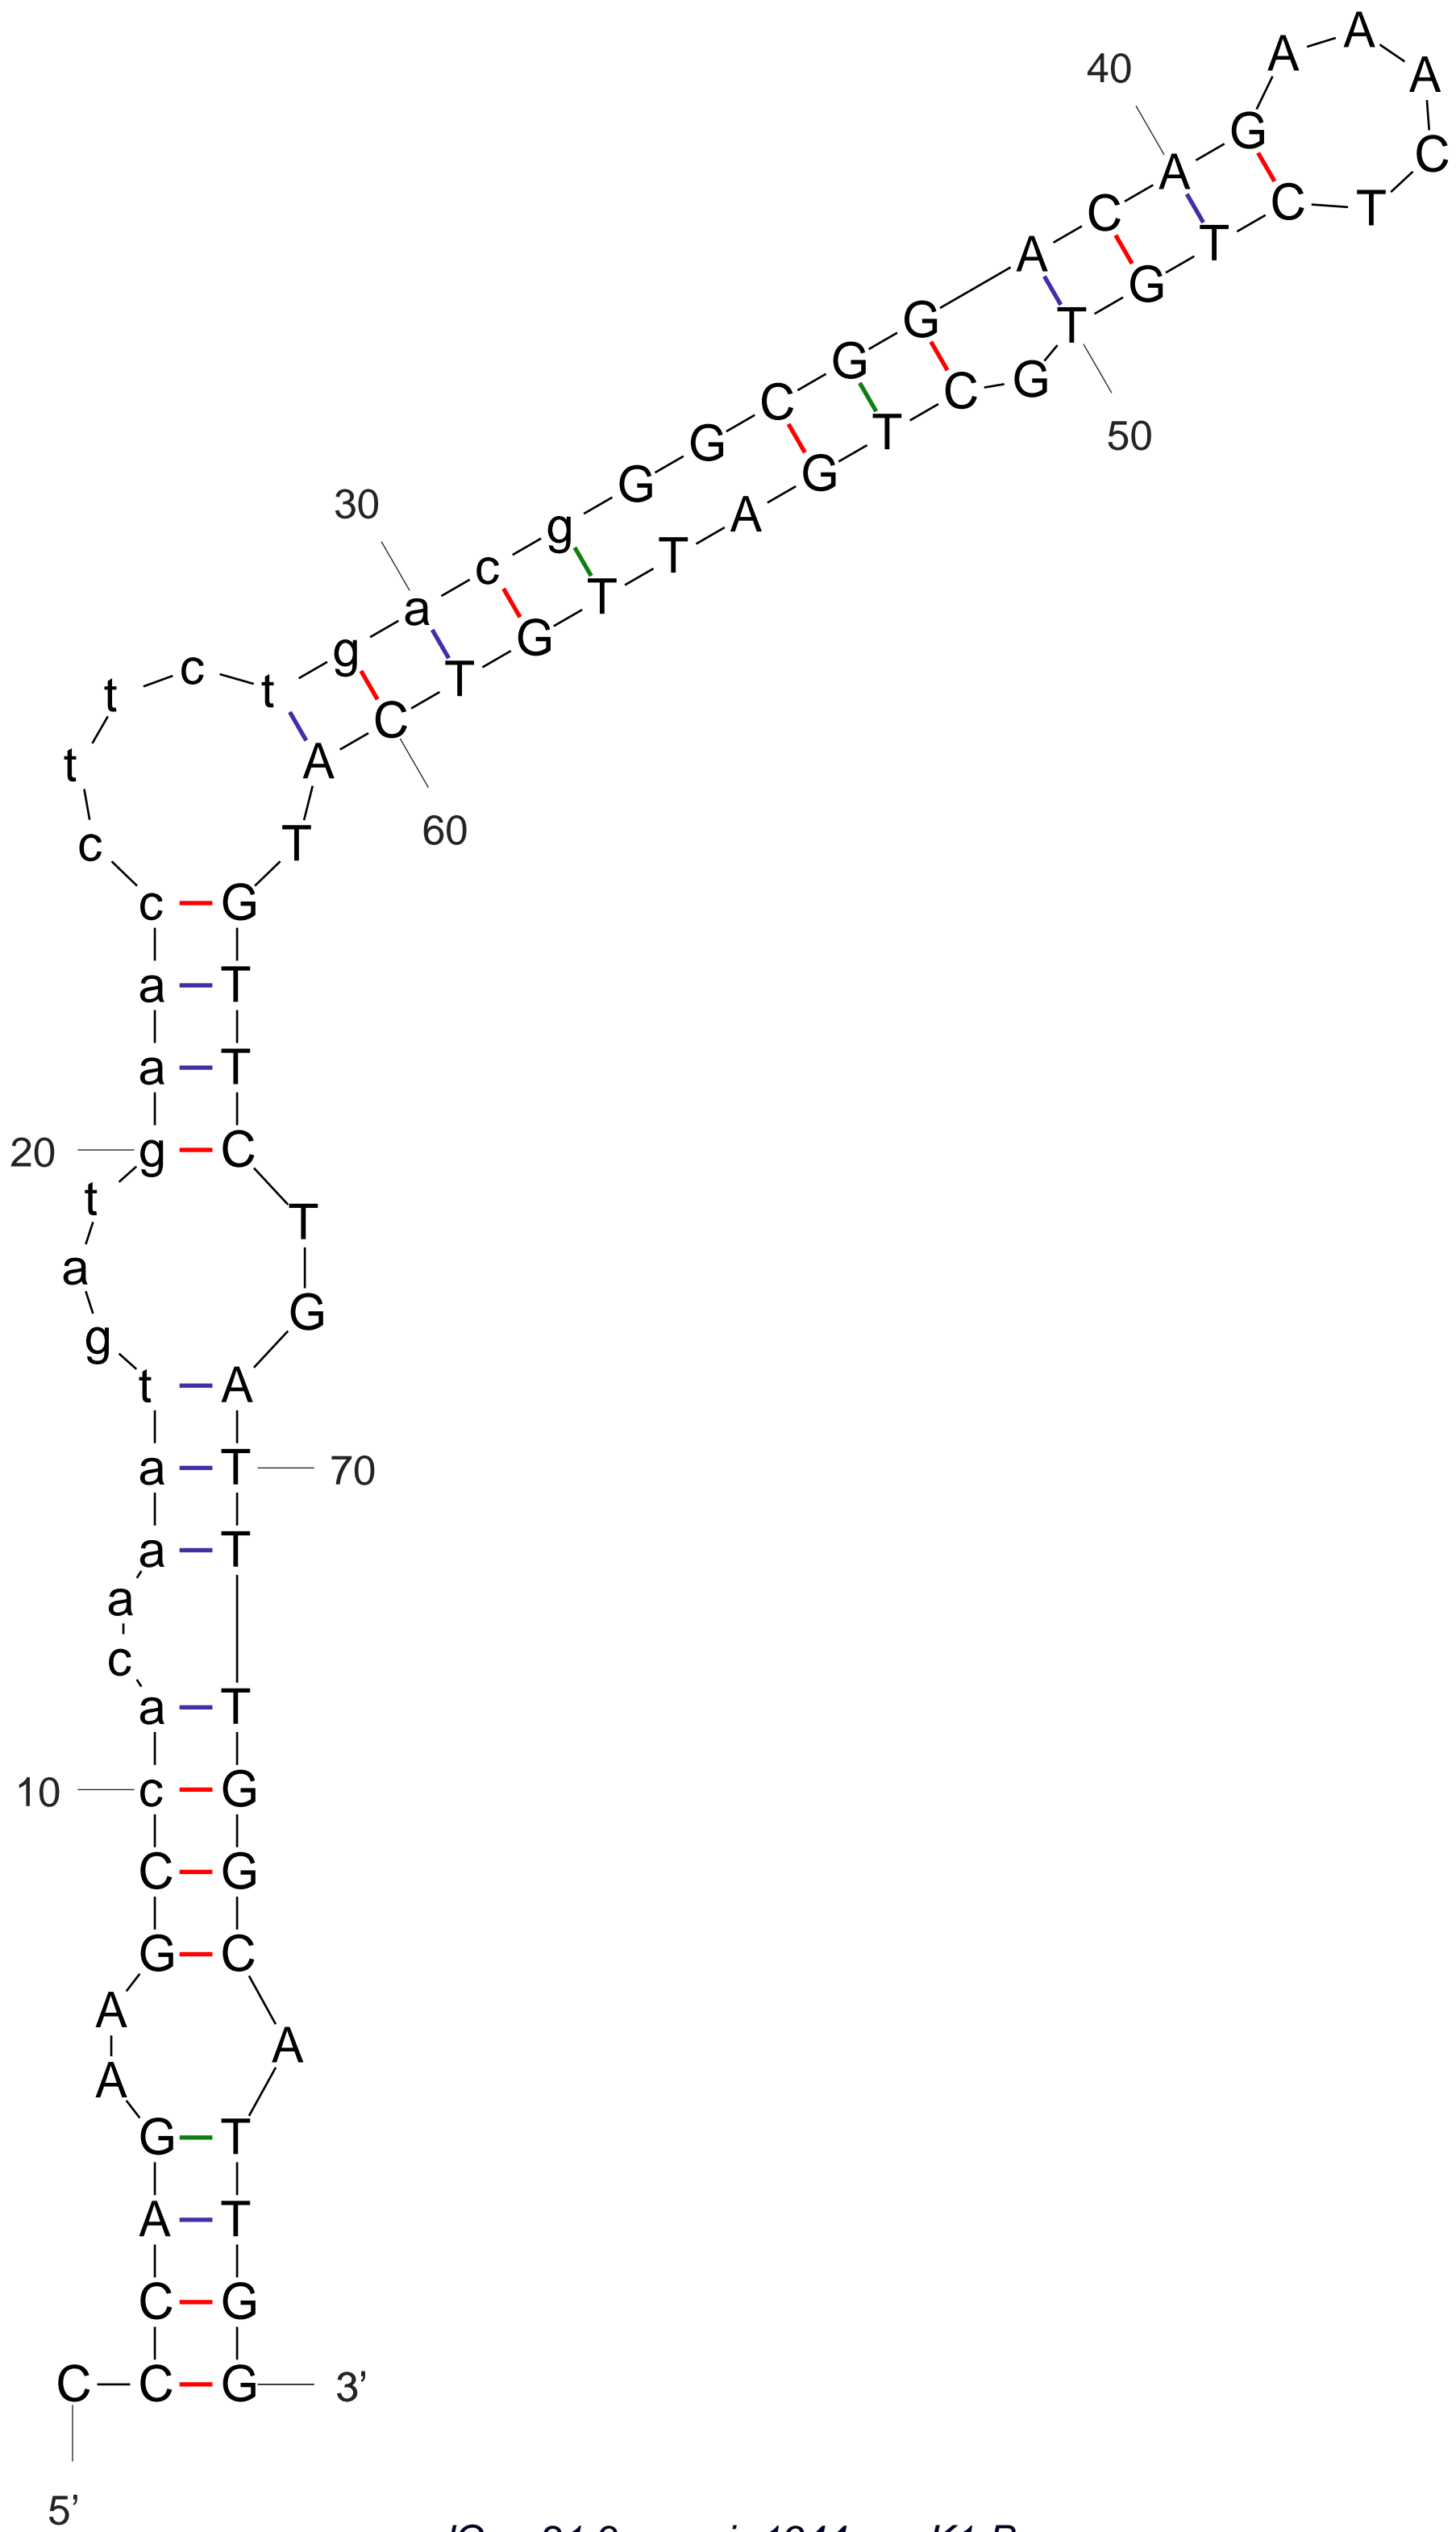

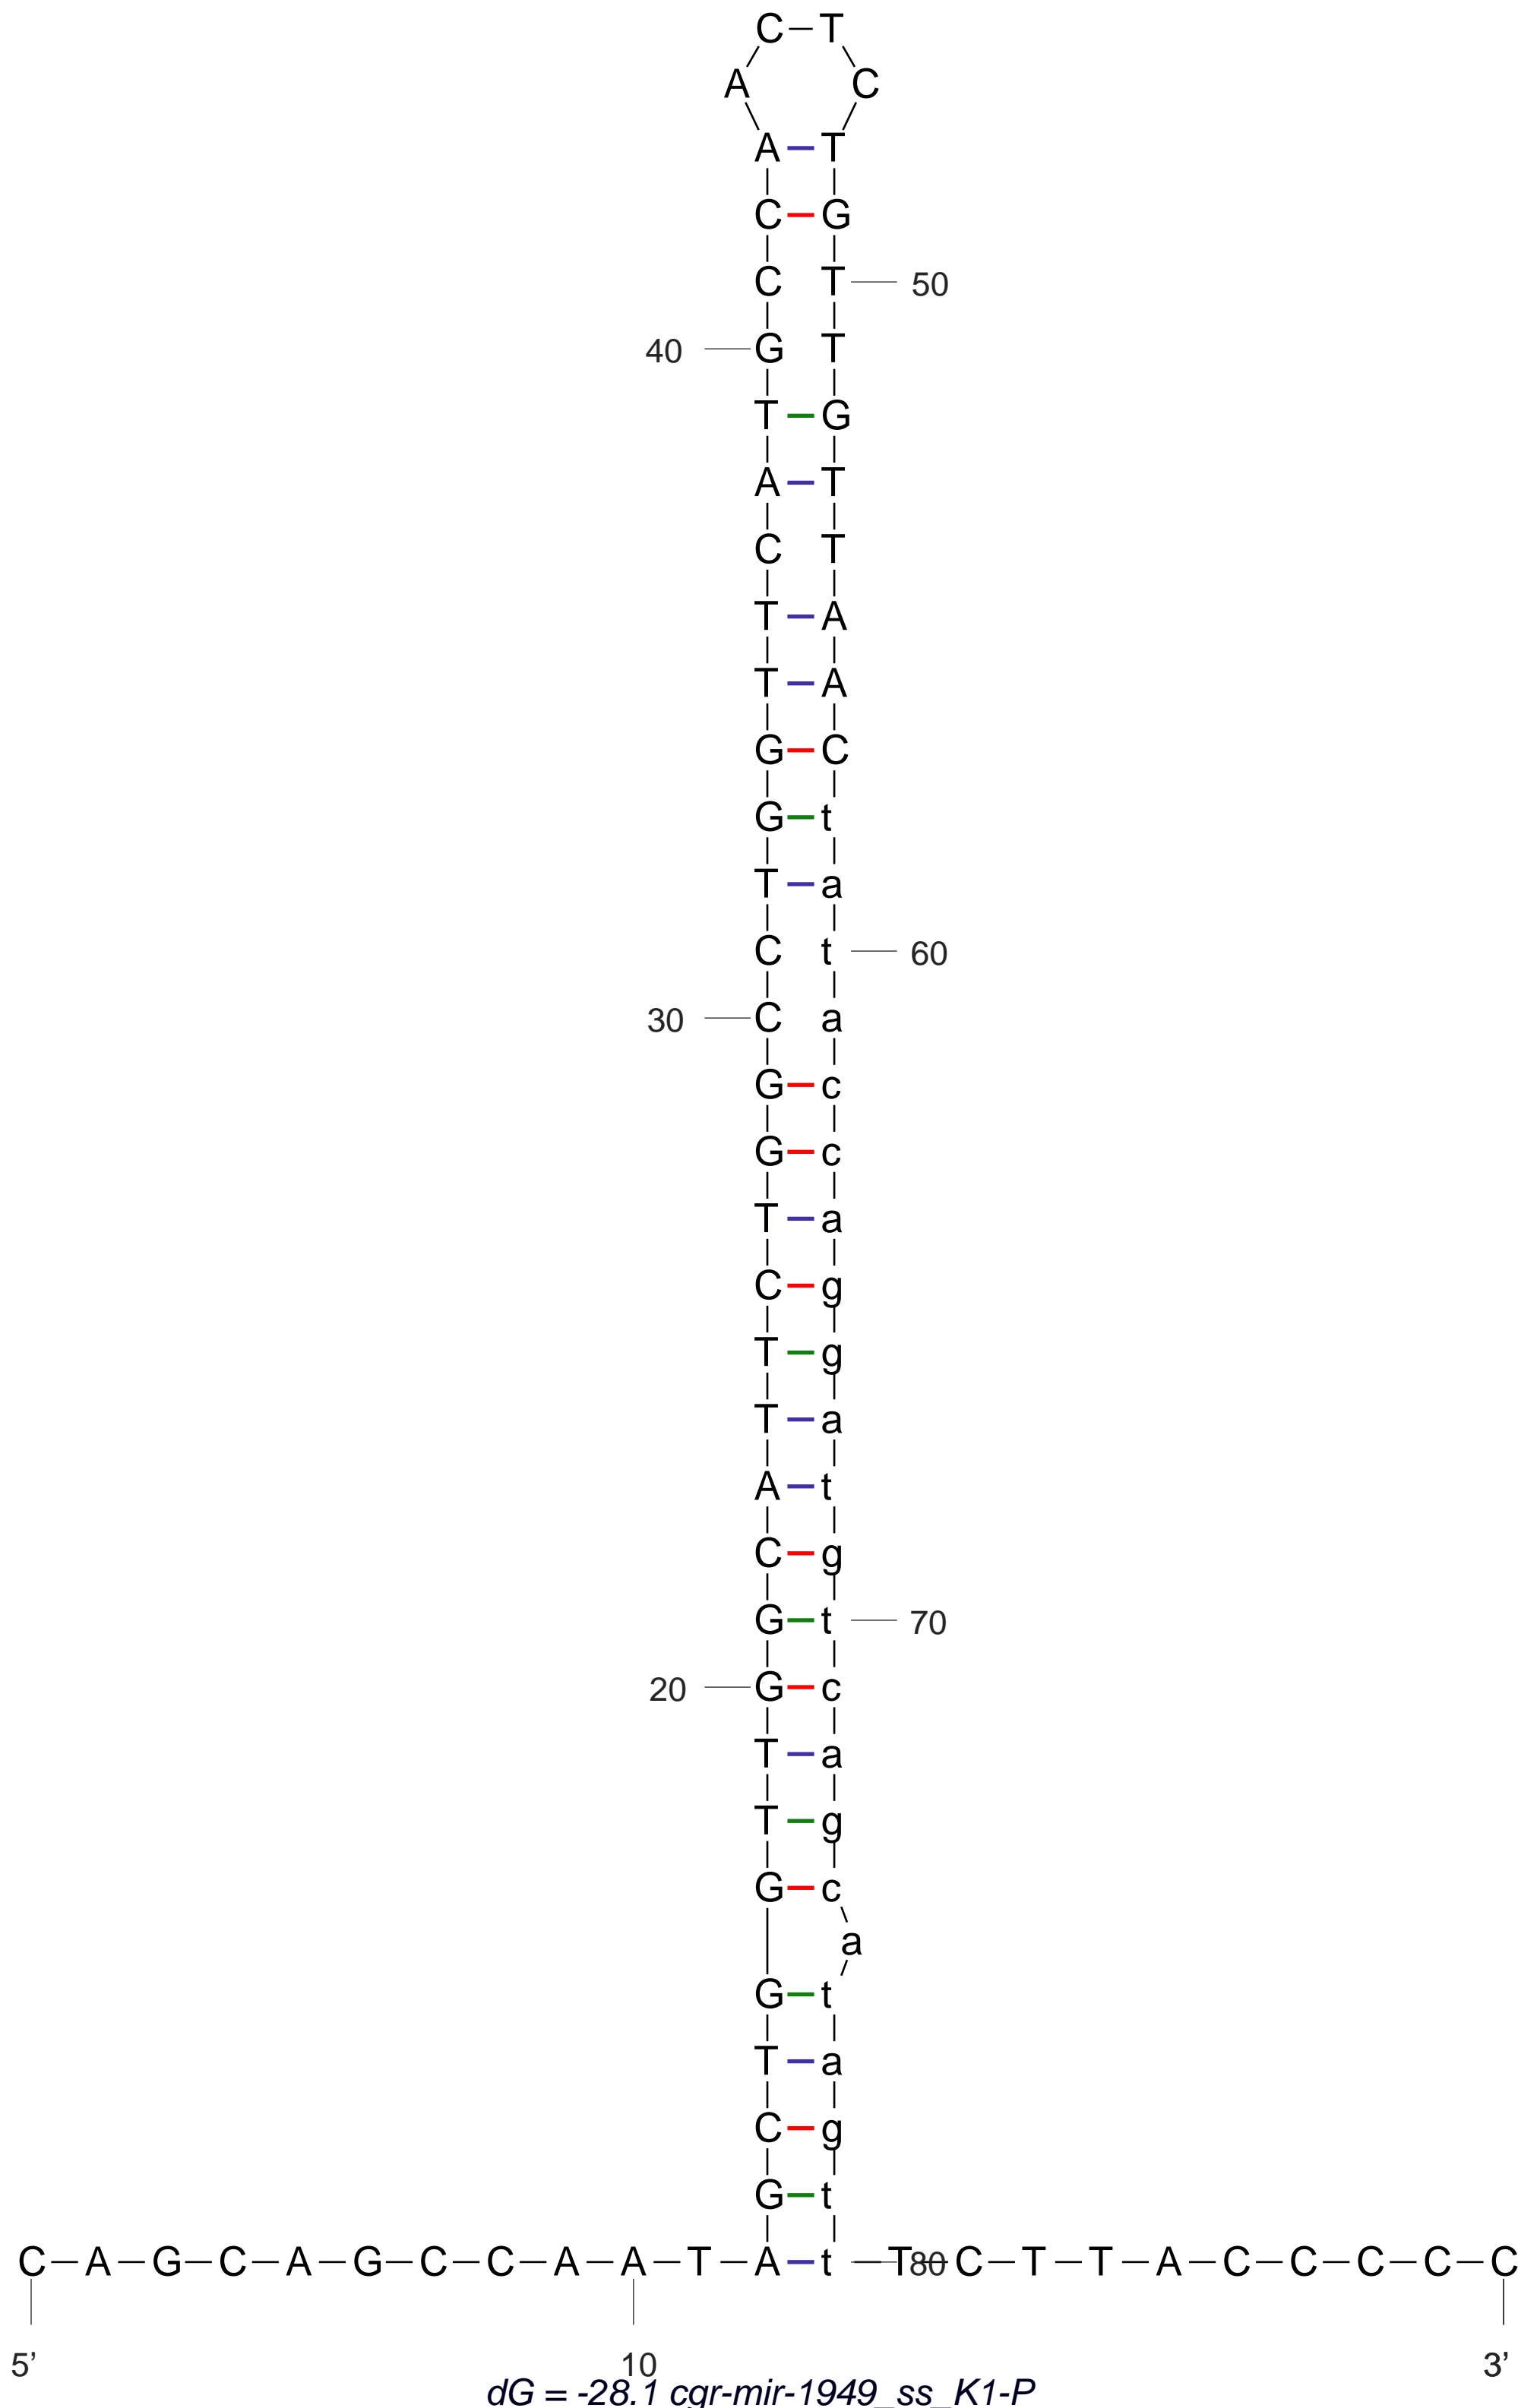



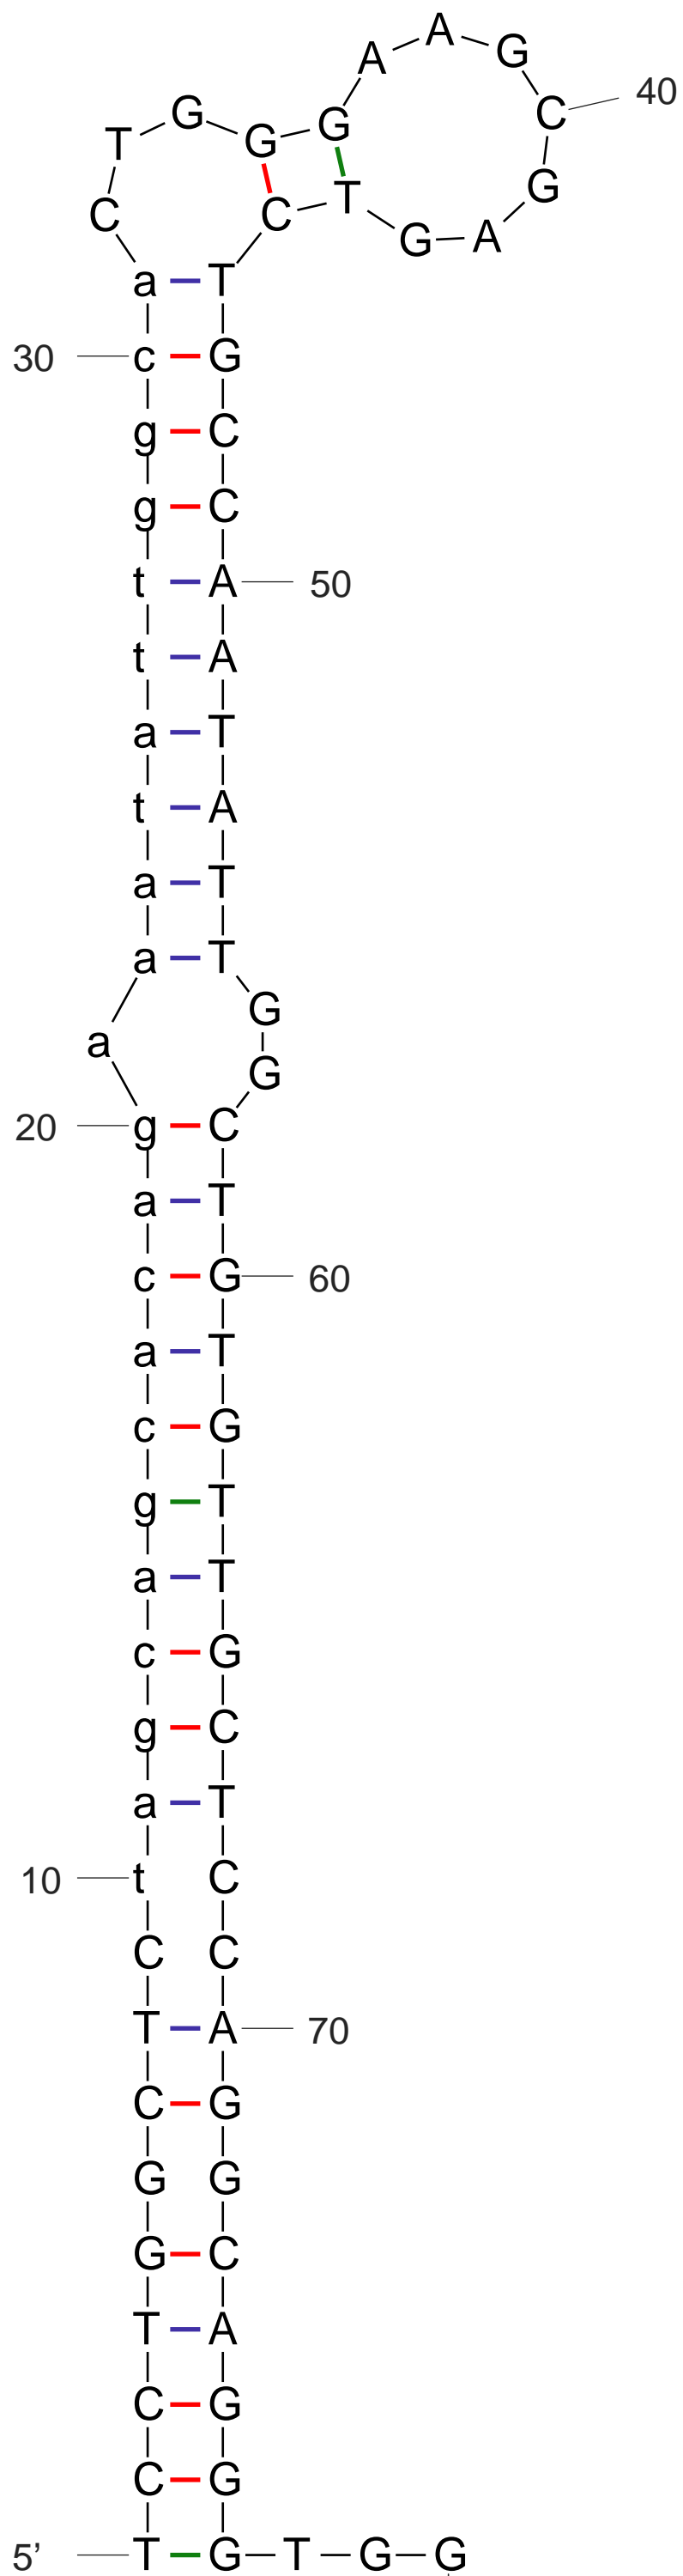

dG = -39.4 cgr-mir-195\_ss\_K1-P

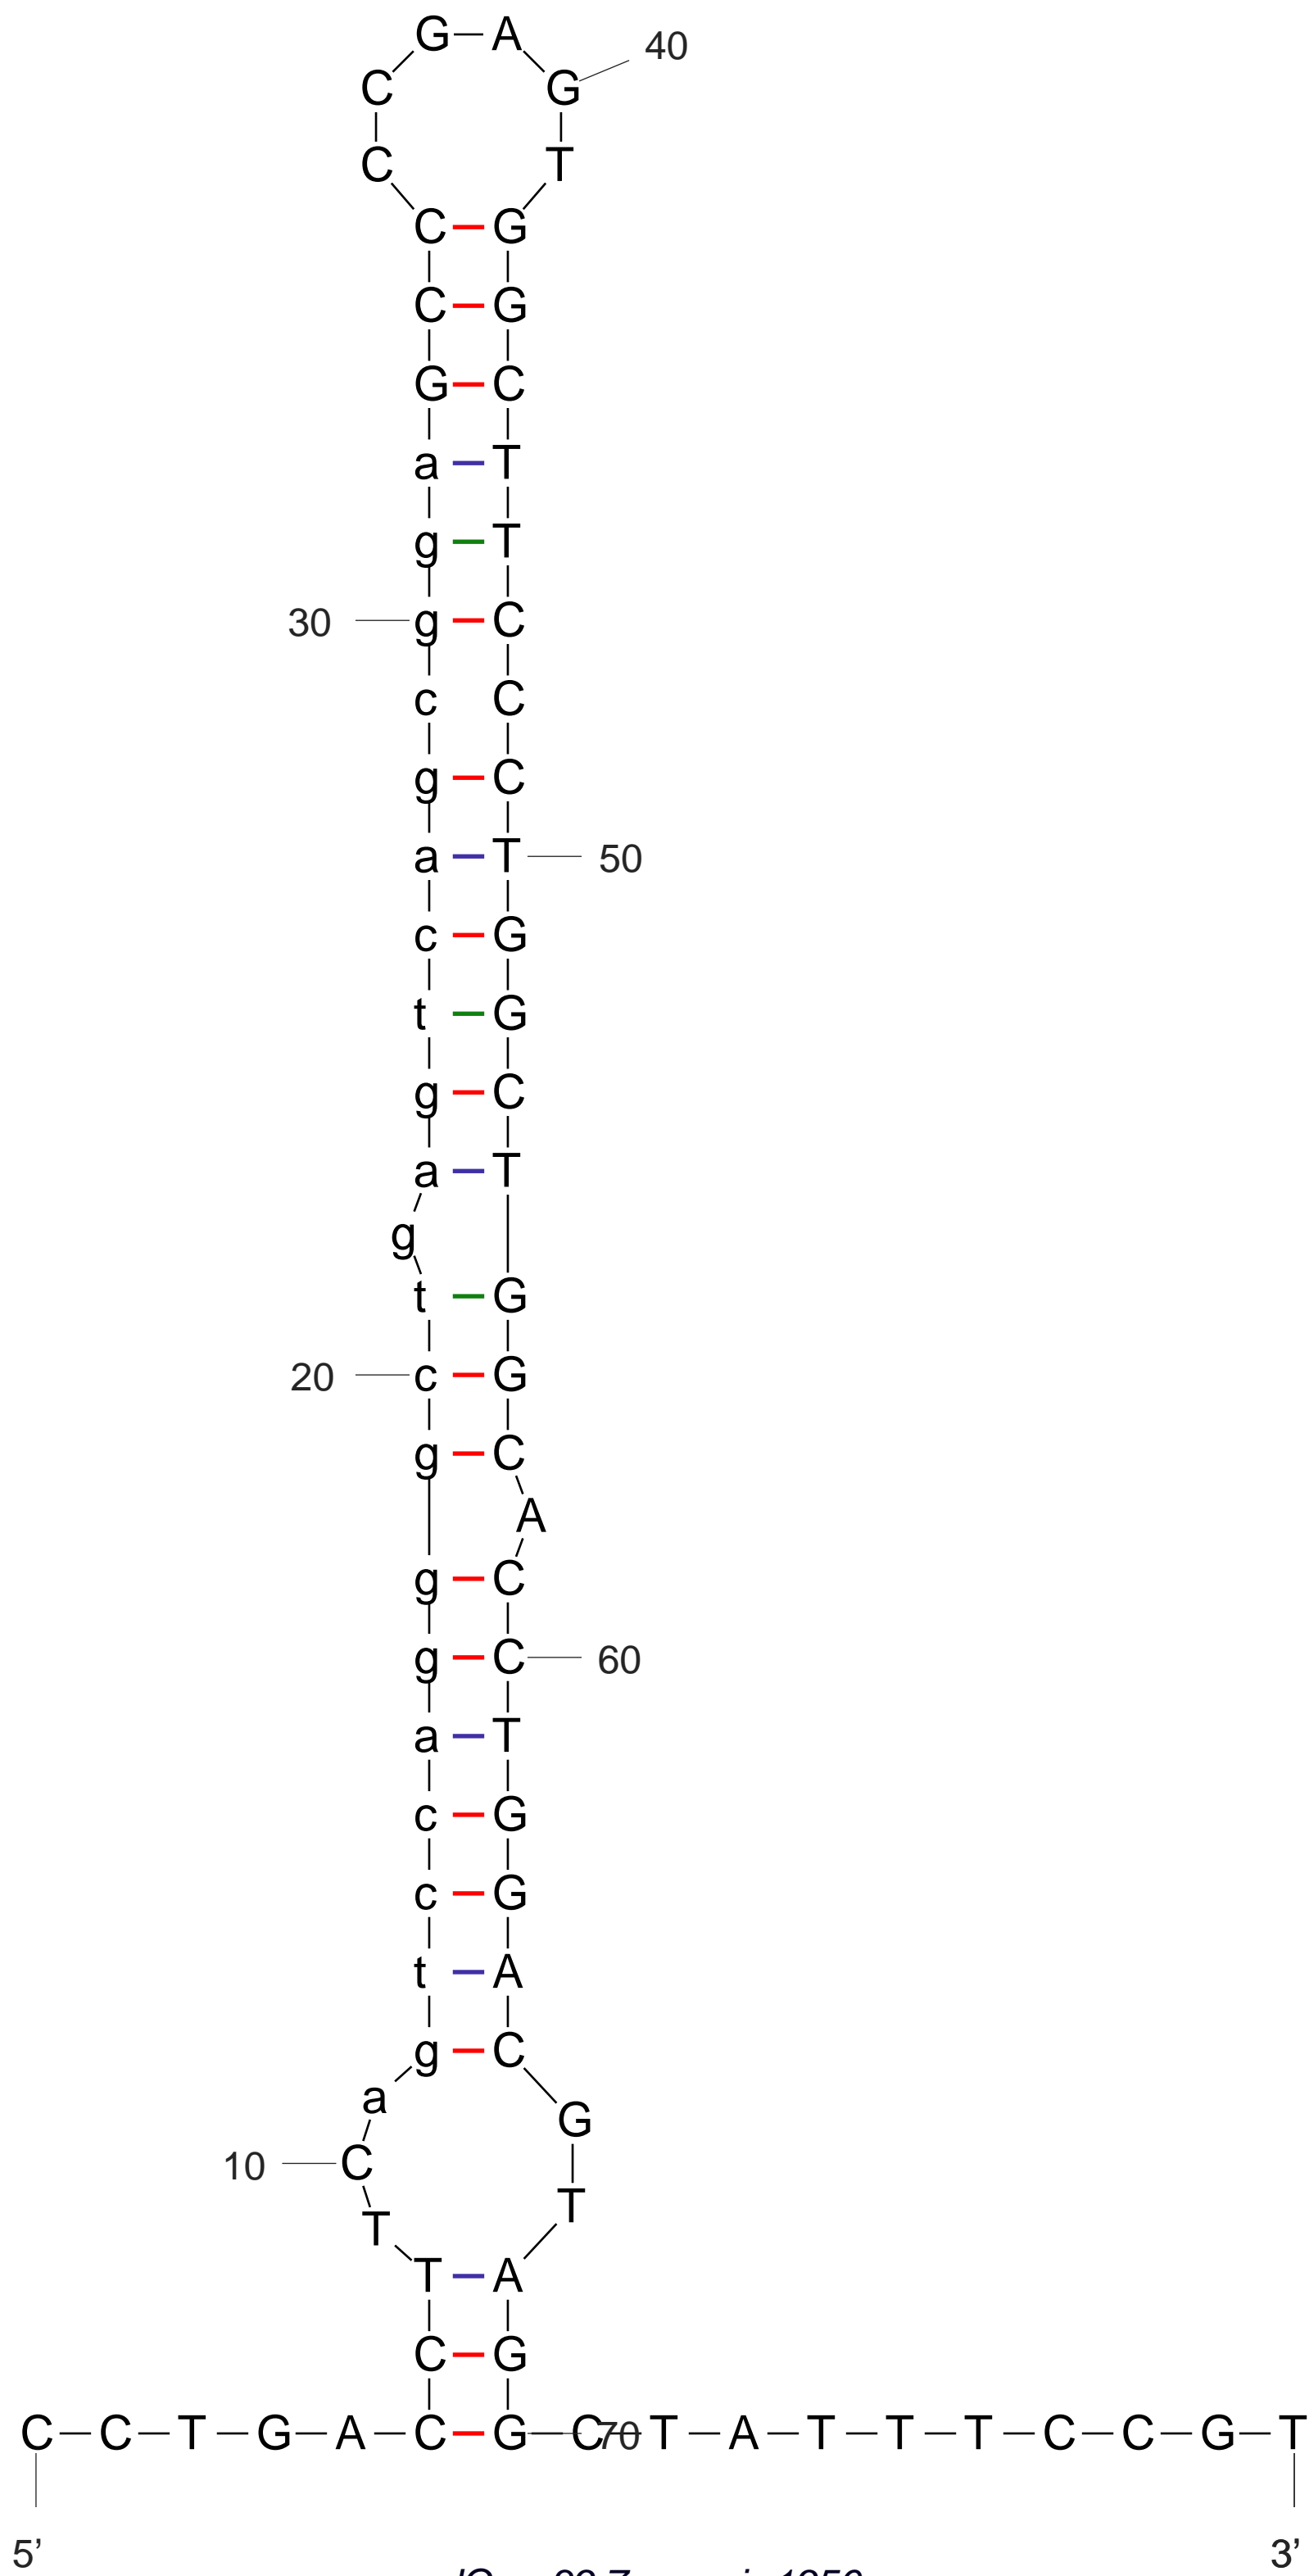

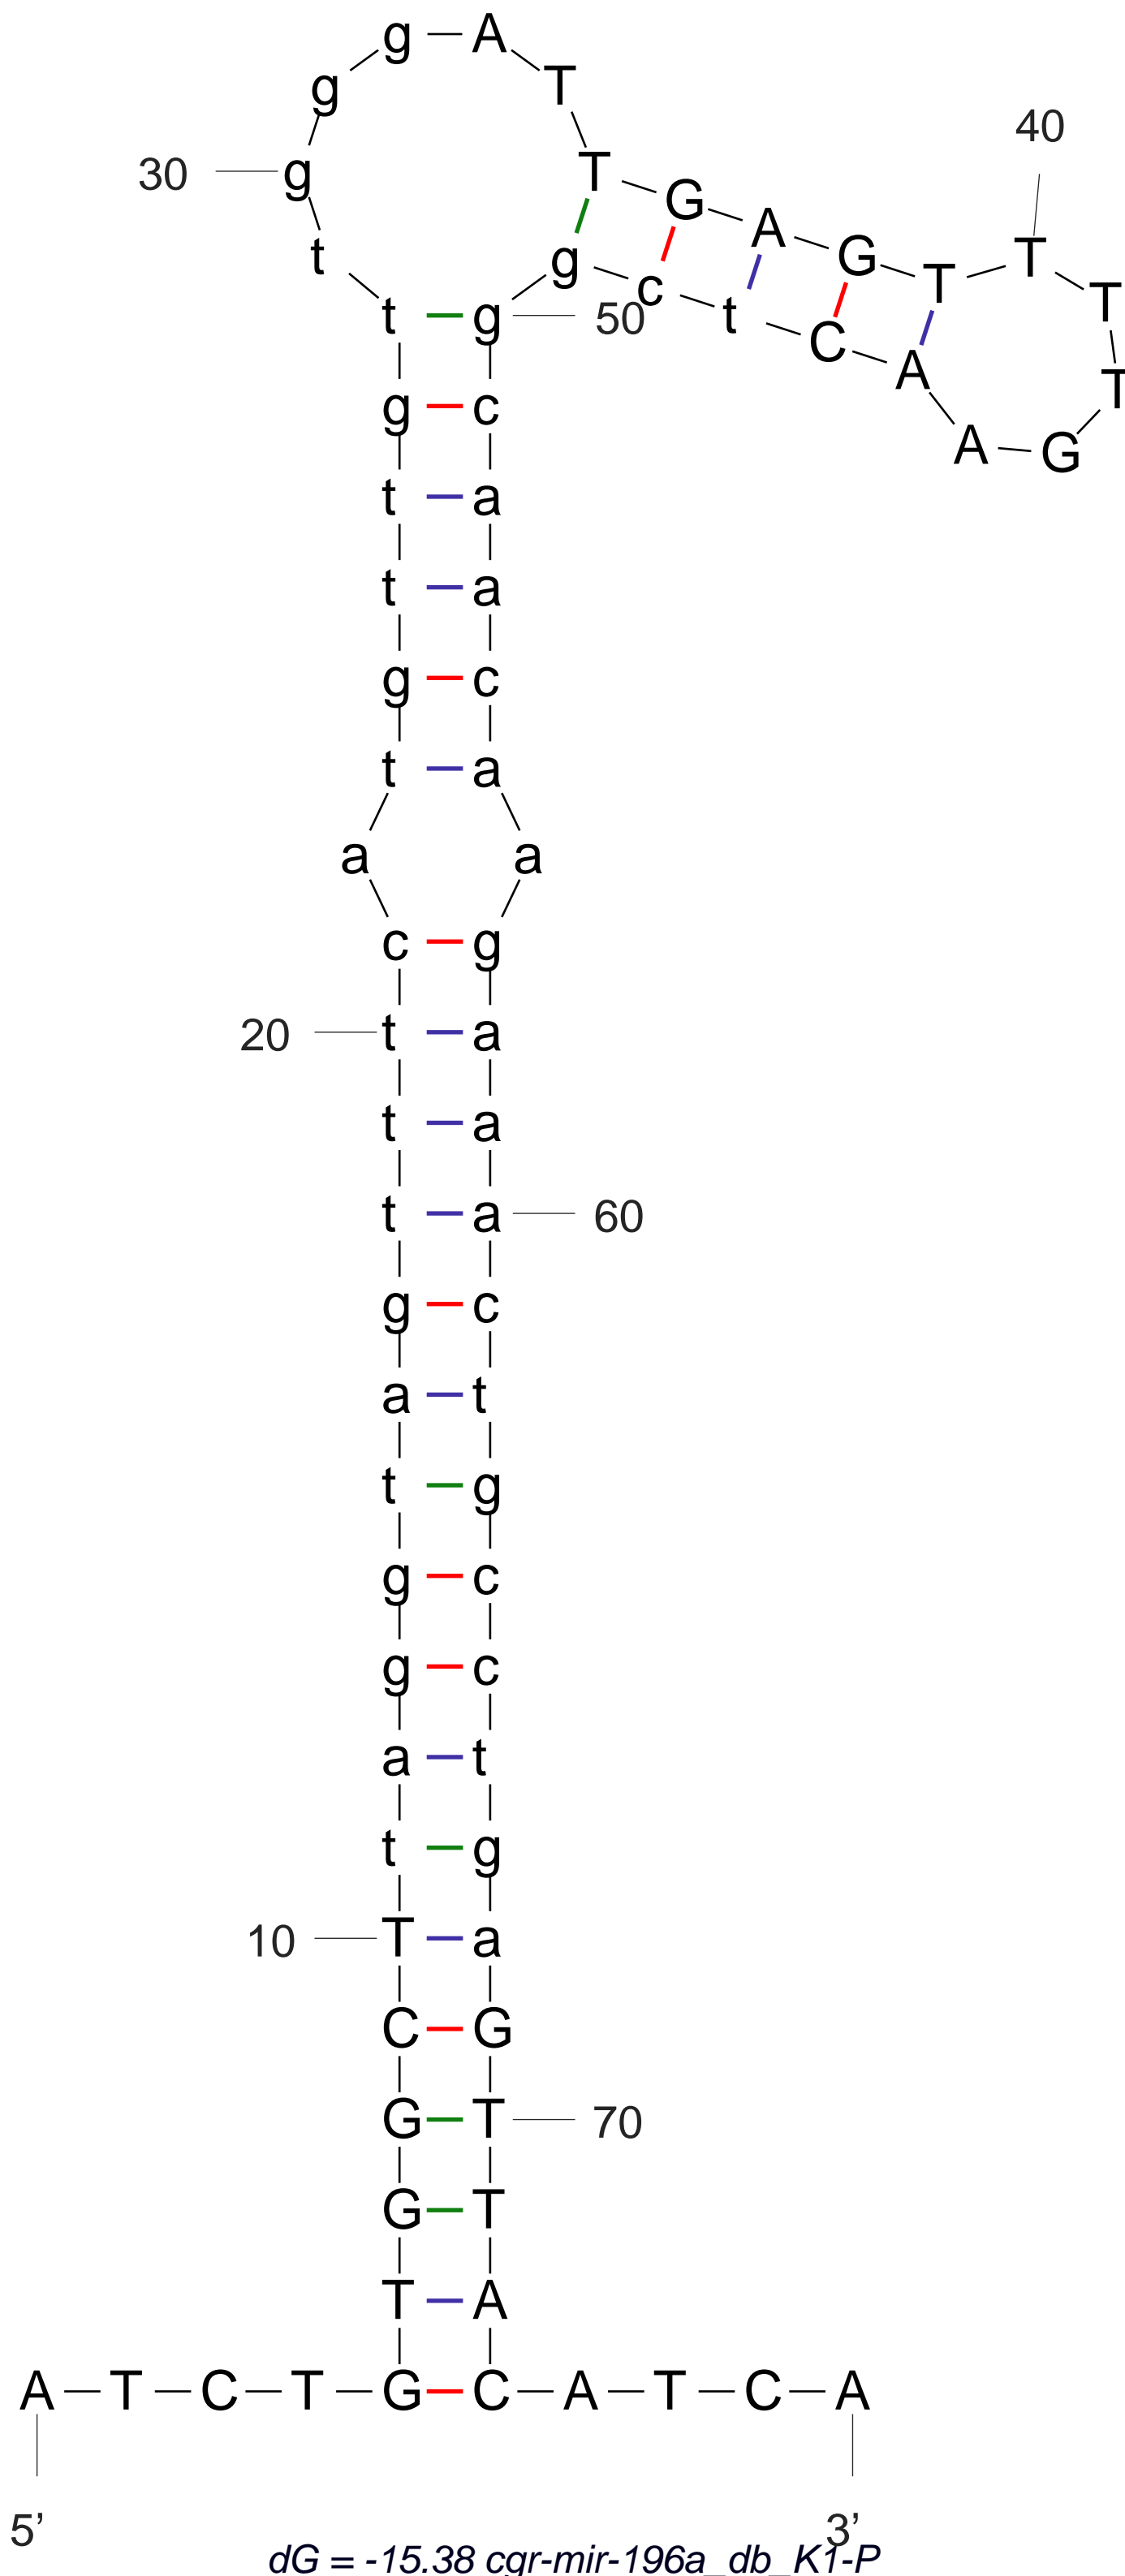

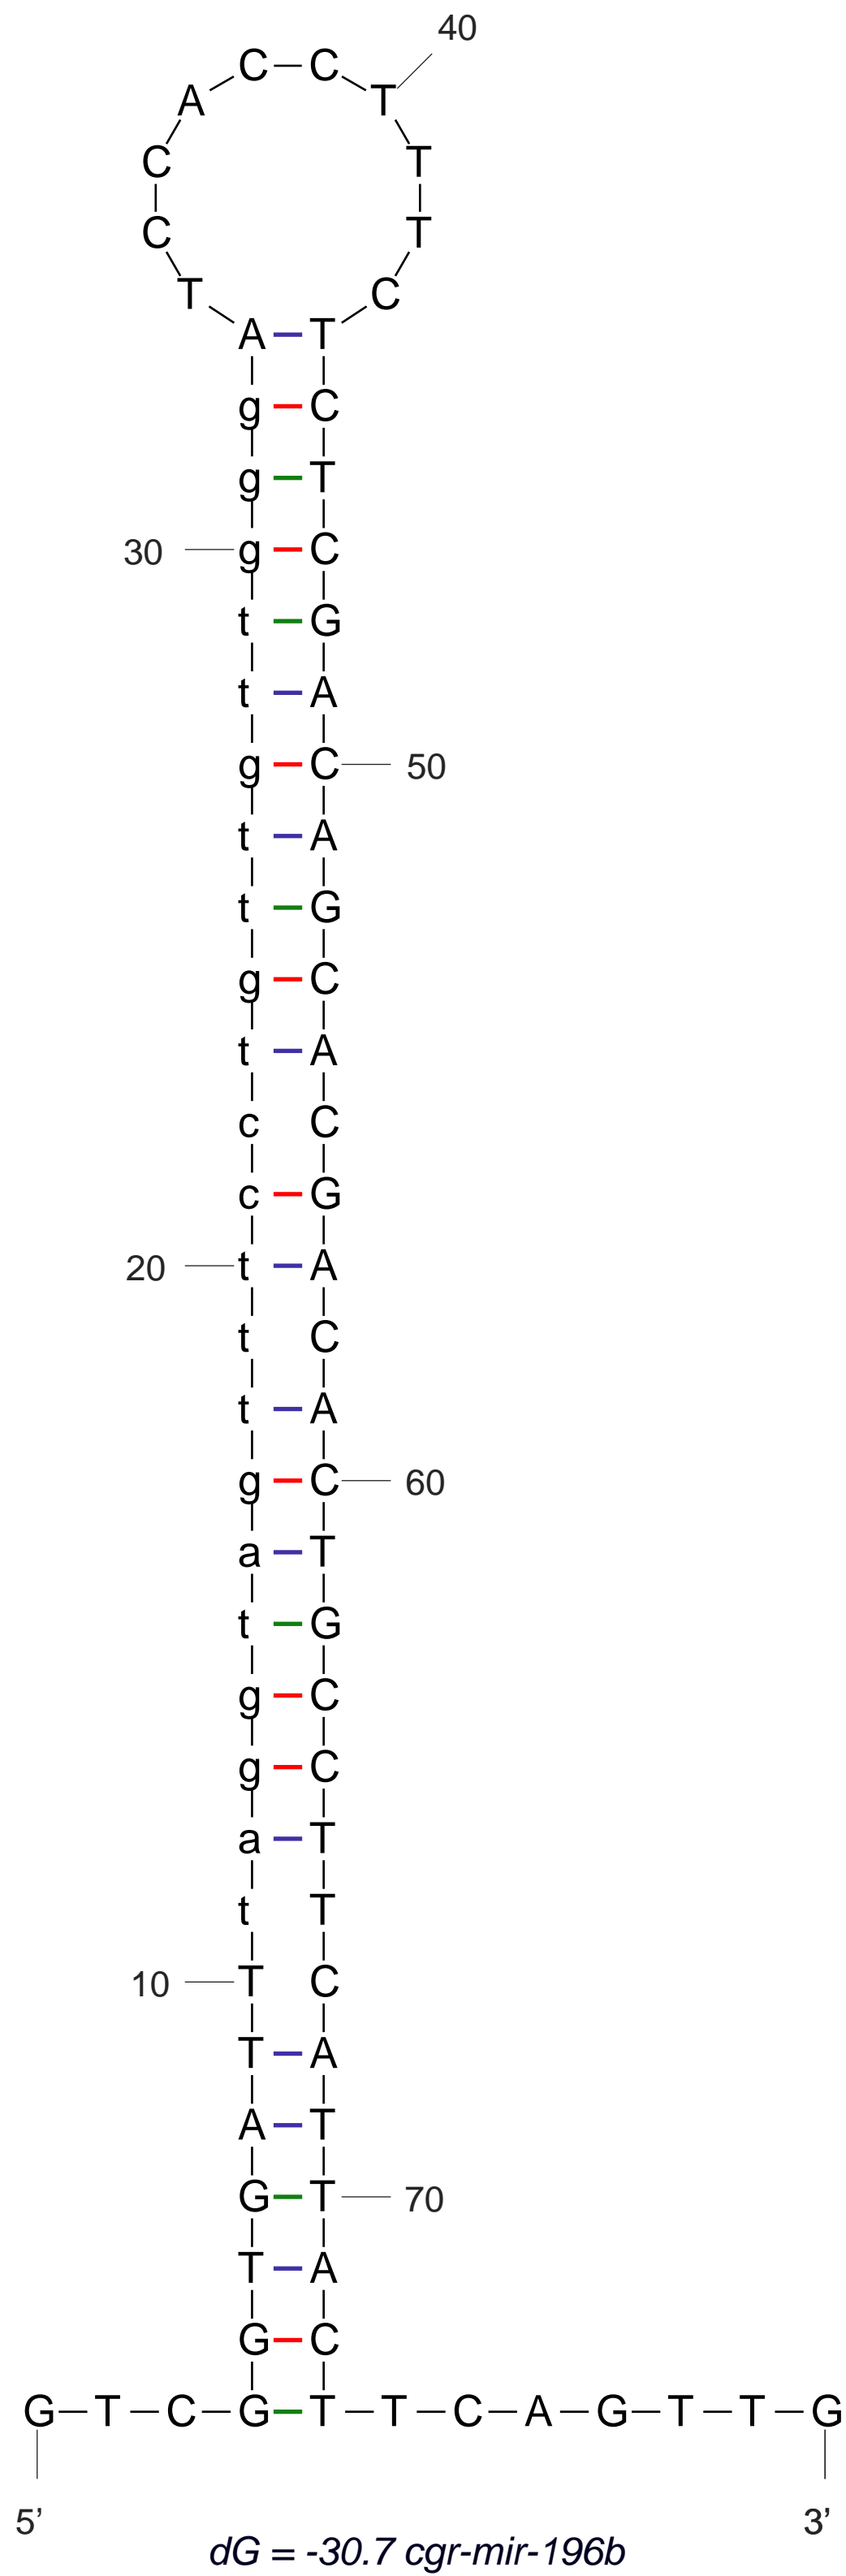

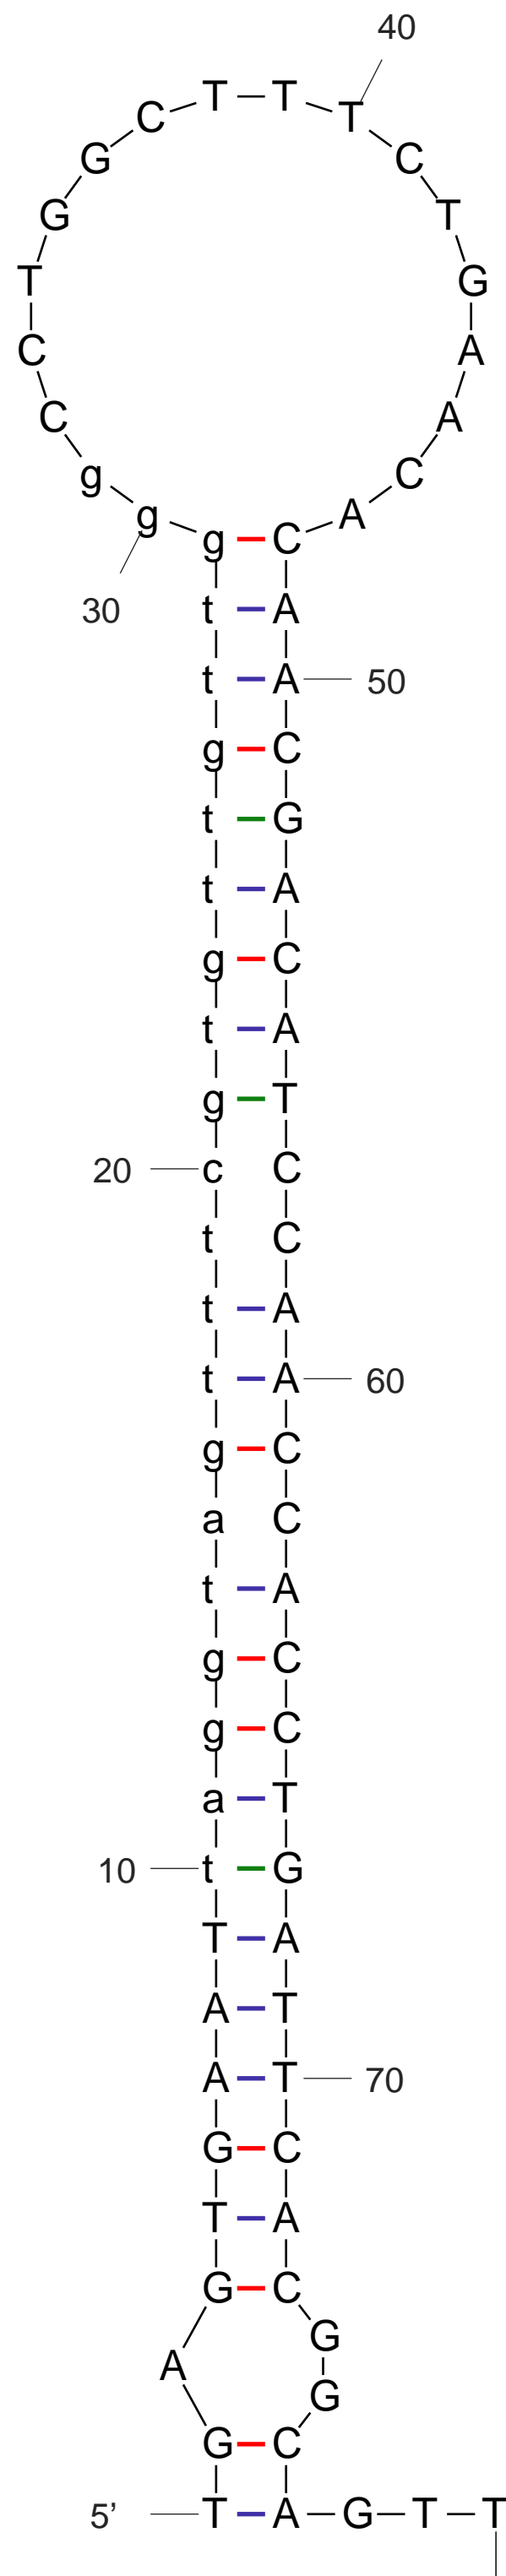

$dG = -28.7$  *cgr-mir-196c\_ss\_K1-P*

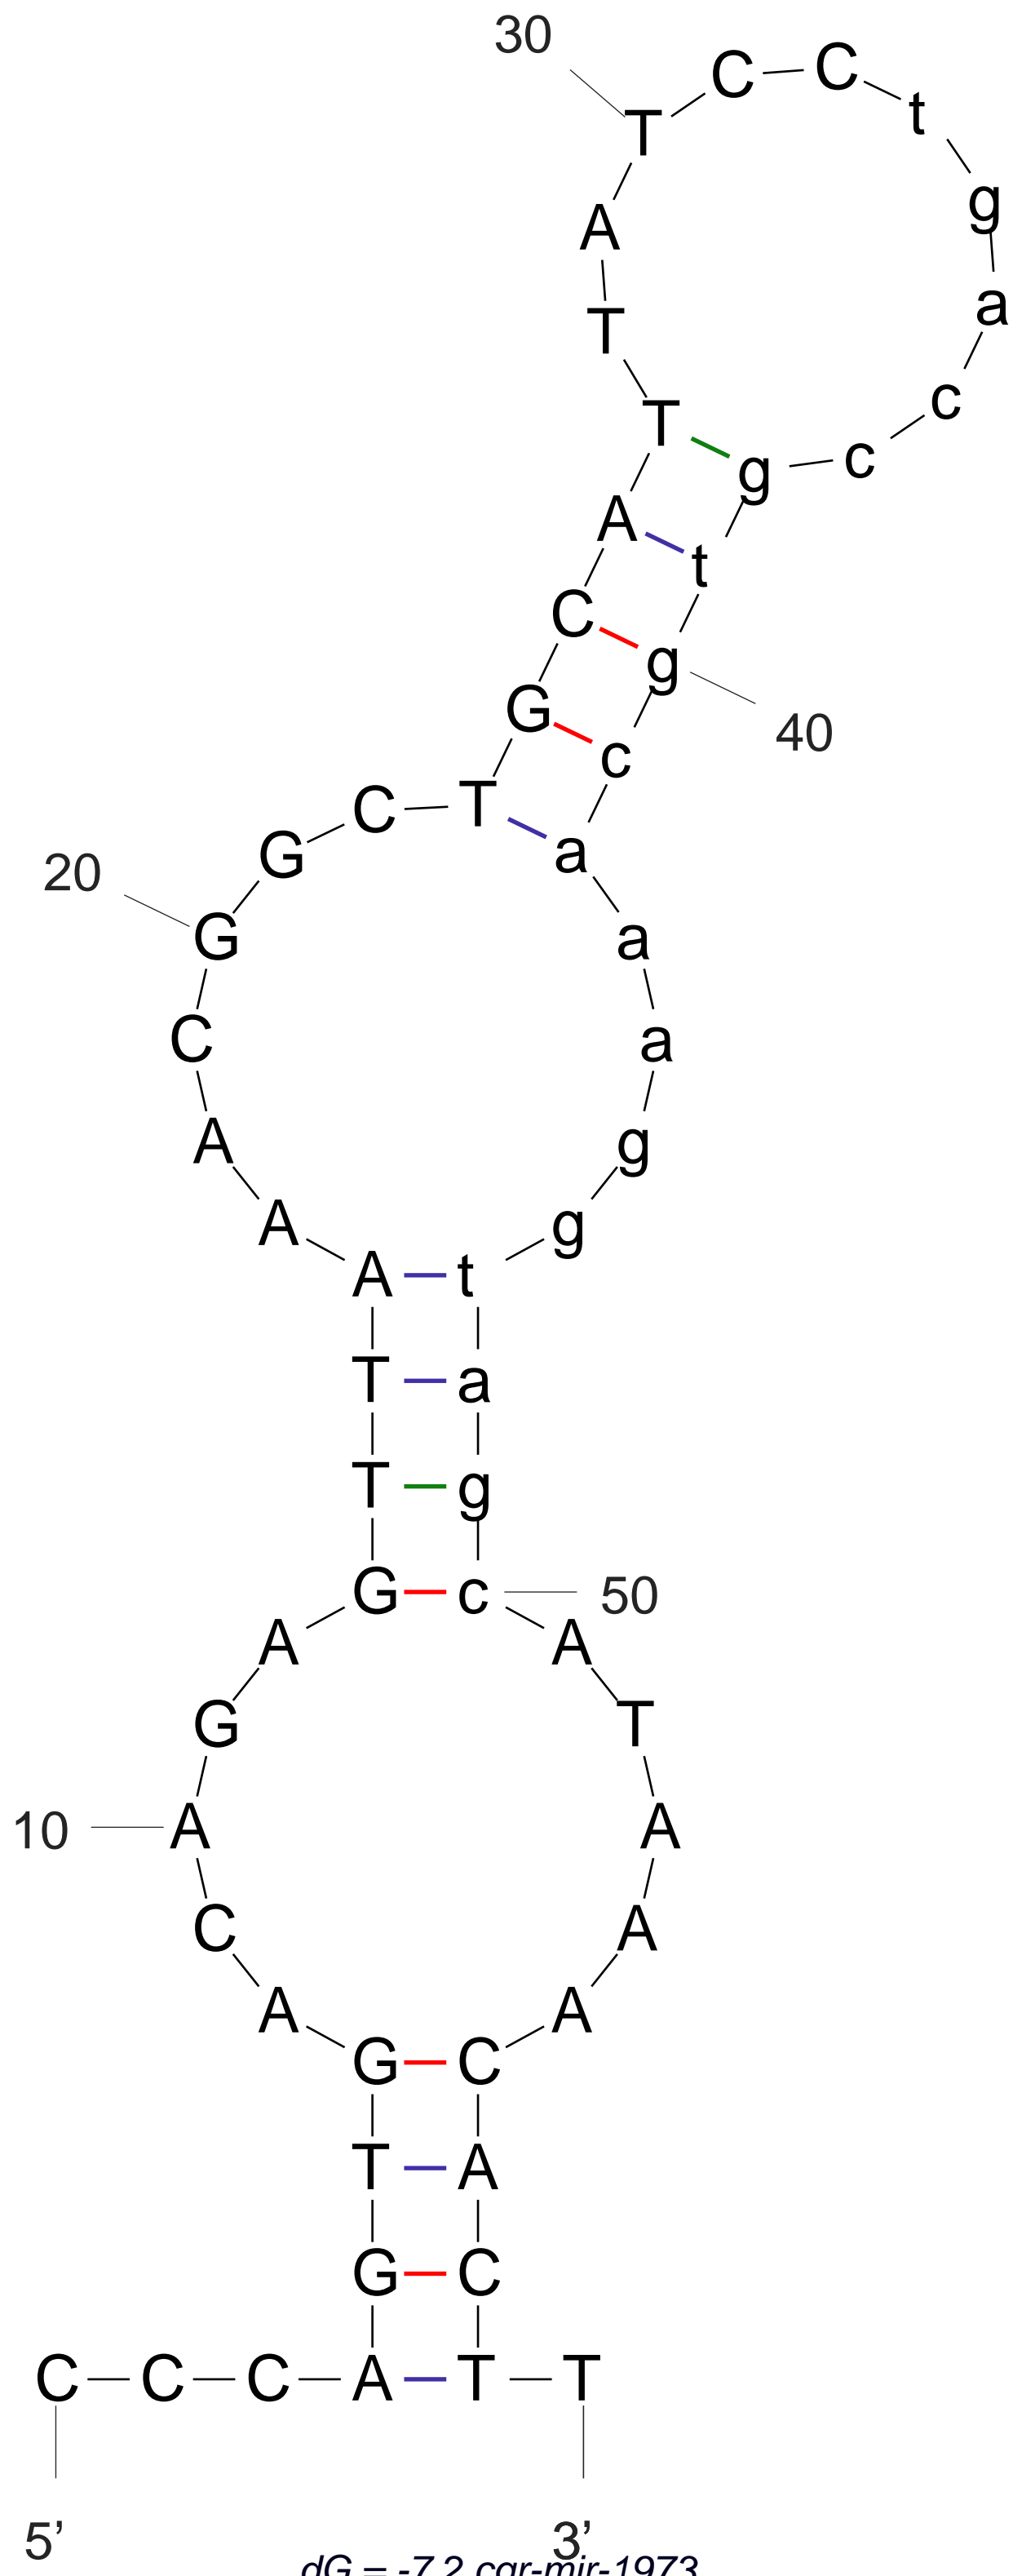

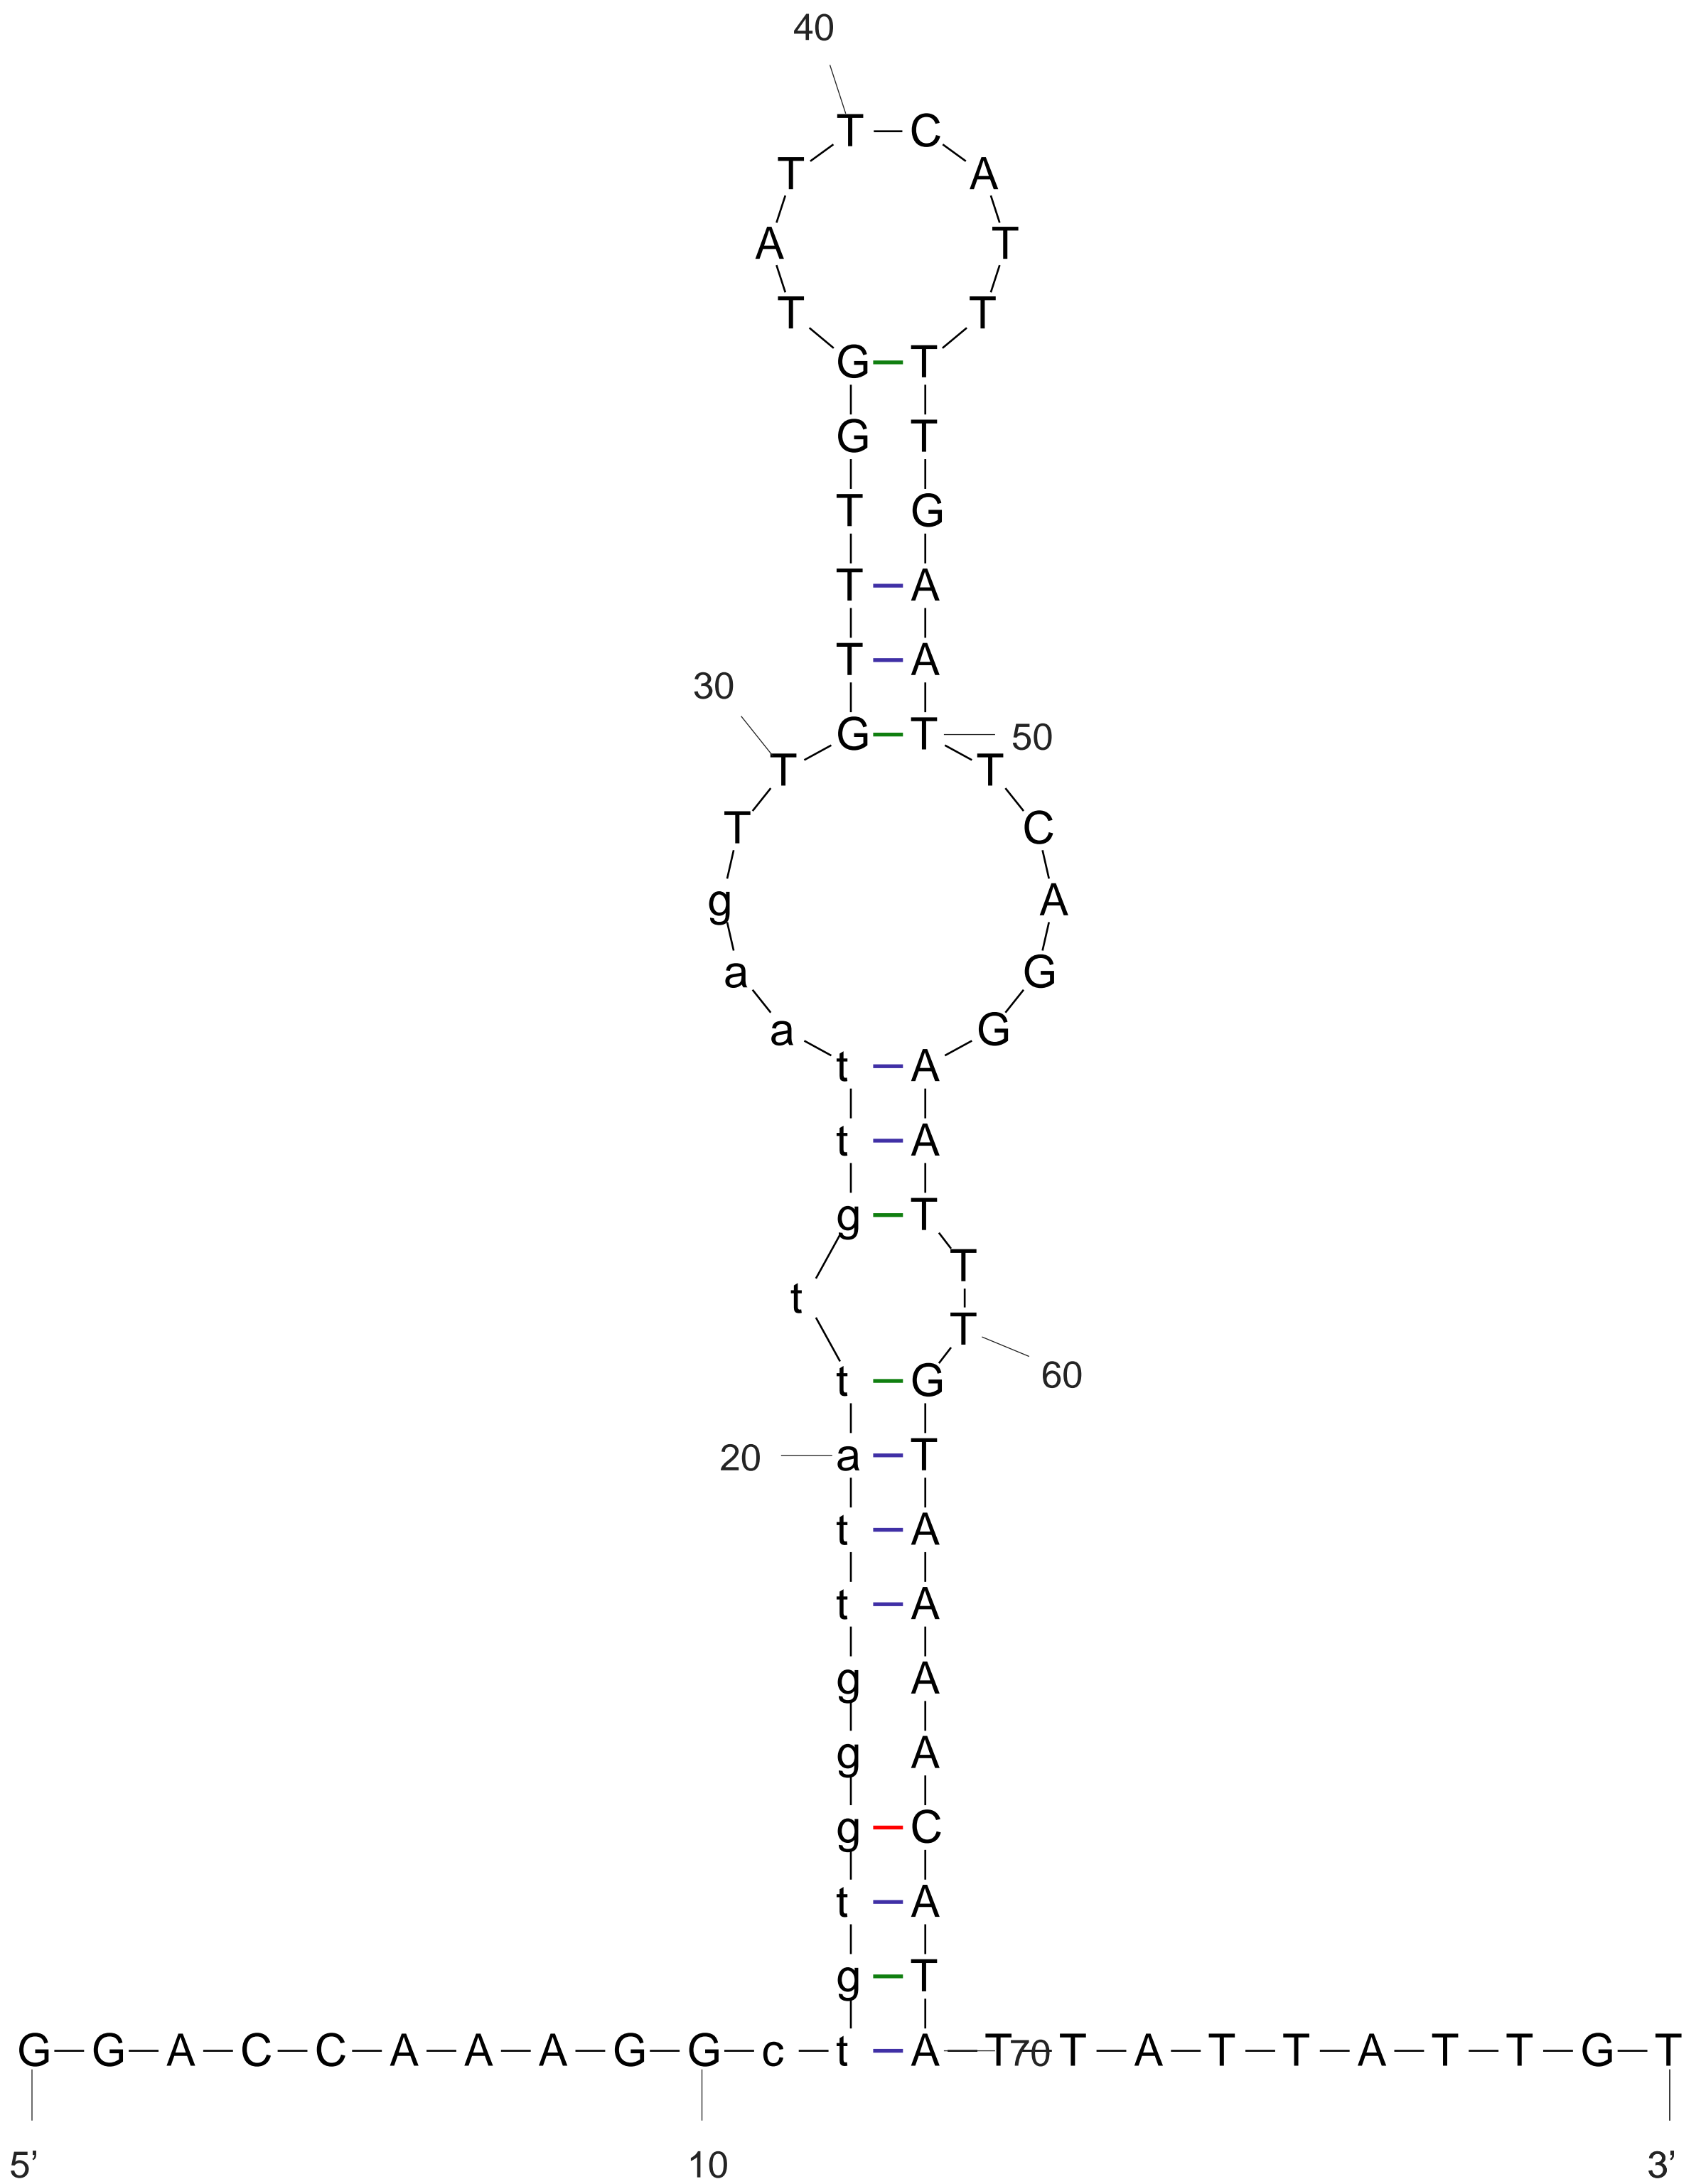

dG = -7.7 cgr-mir-1975

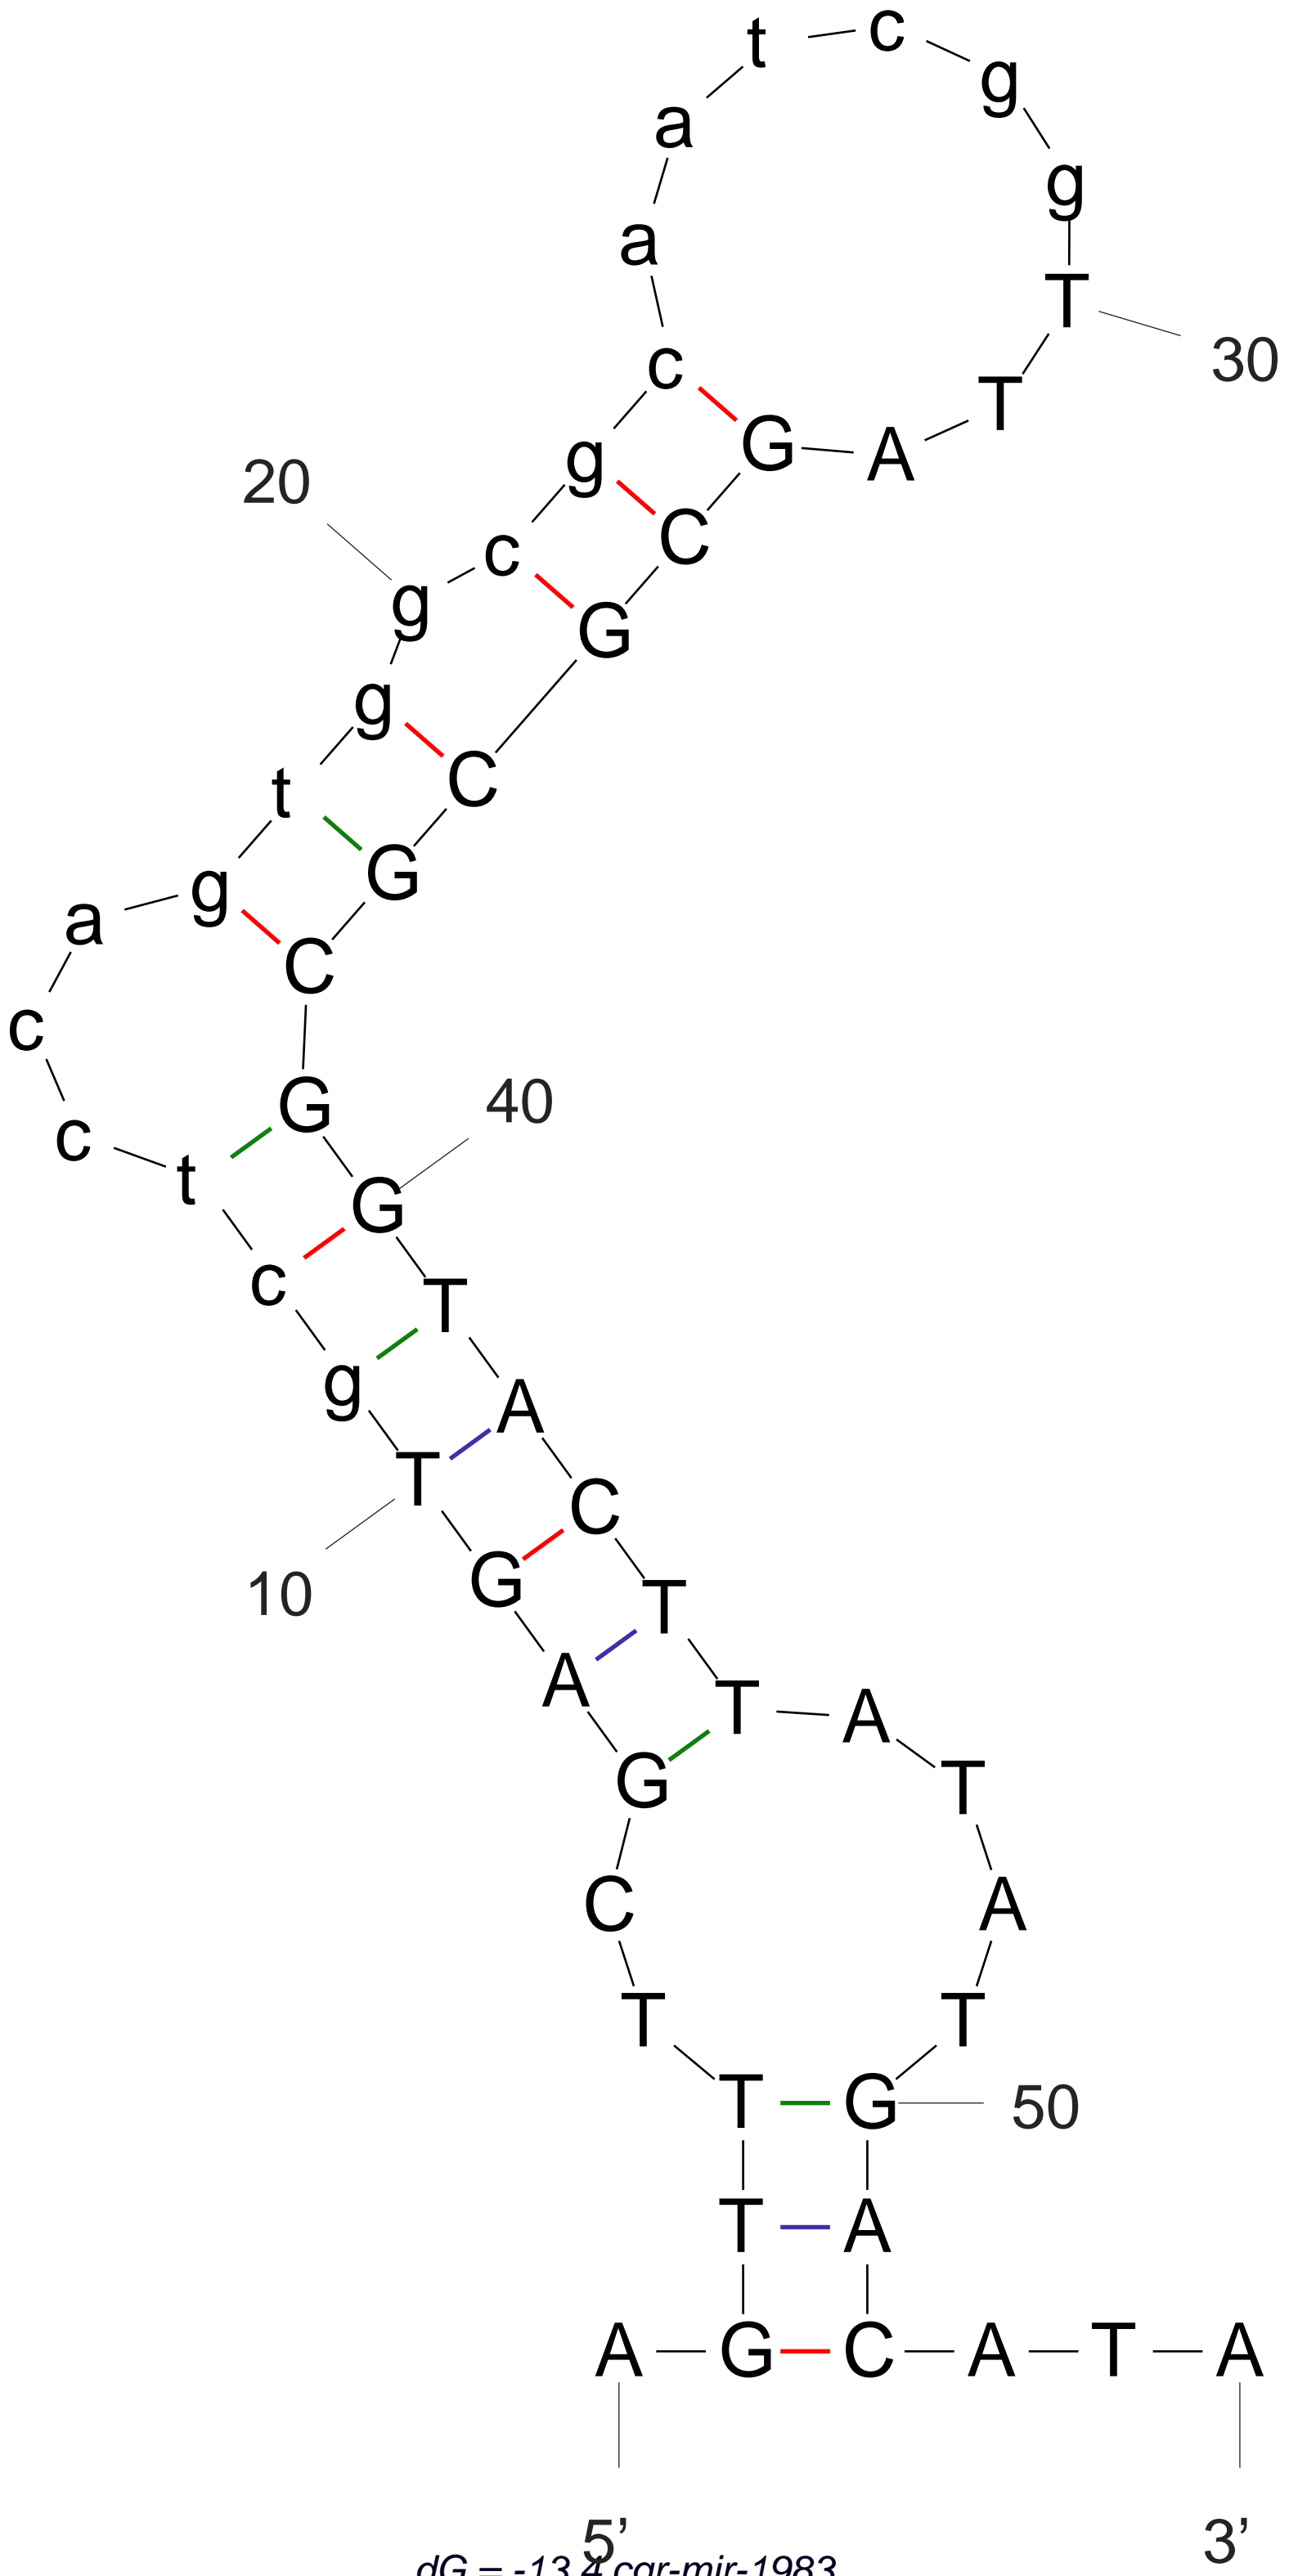



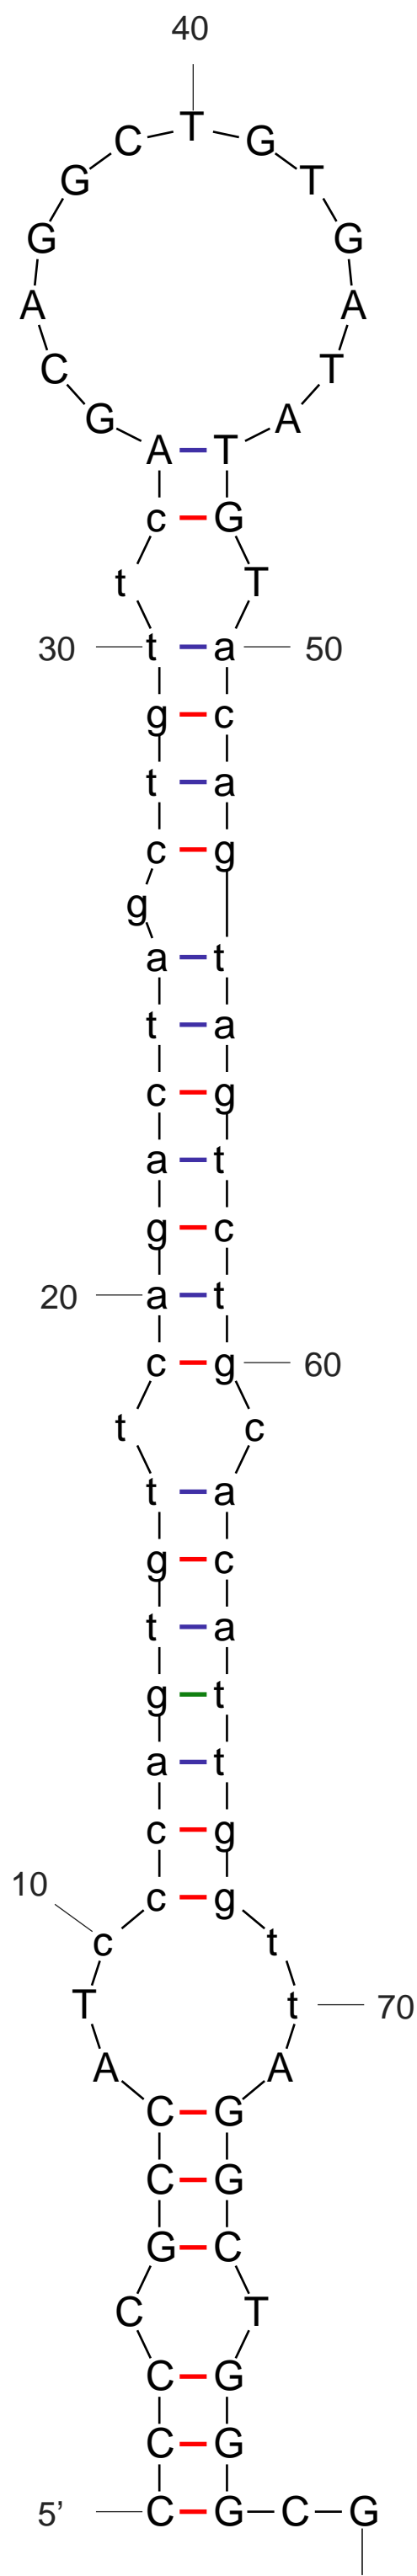

dG = -13.46 *cgr-mir-199a\_db\_K1-P*



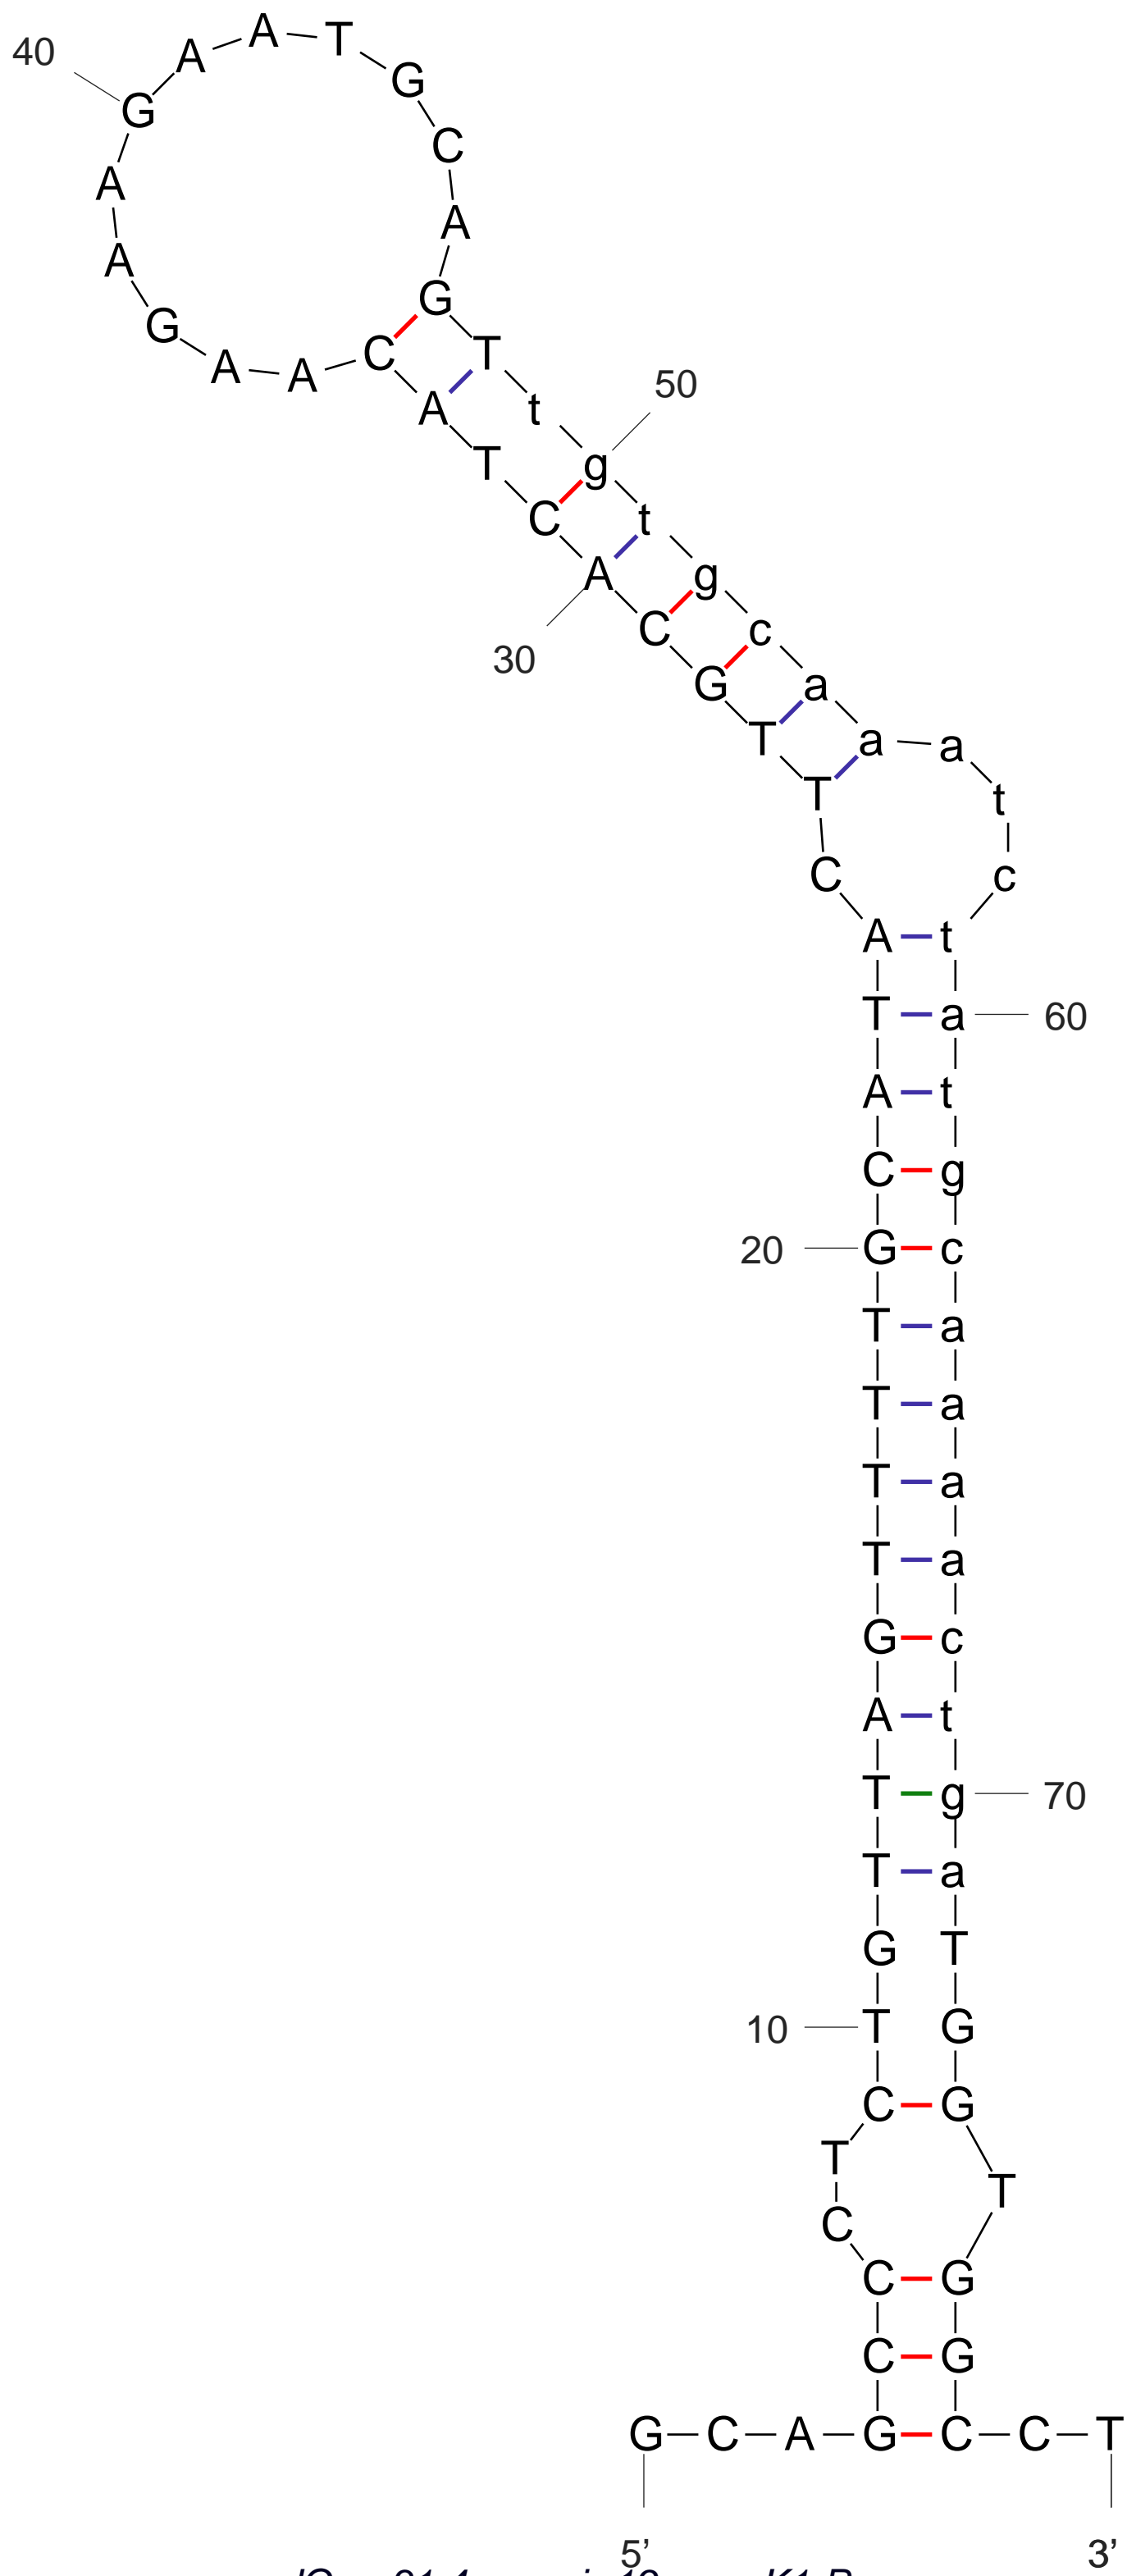





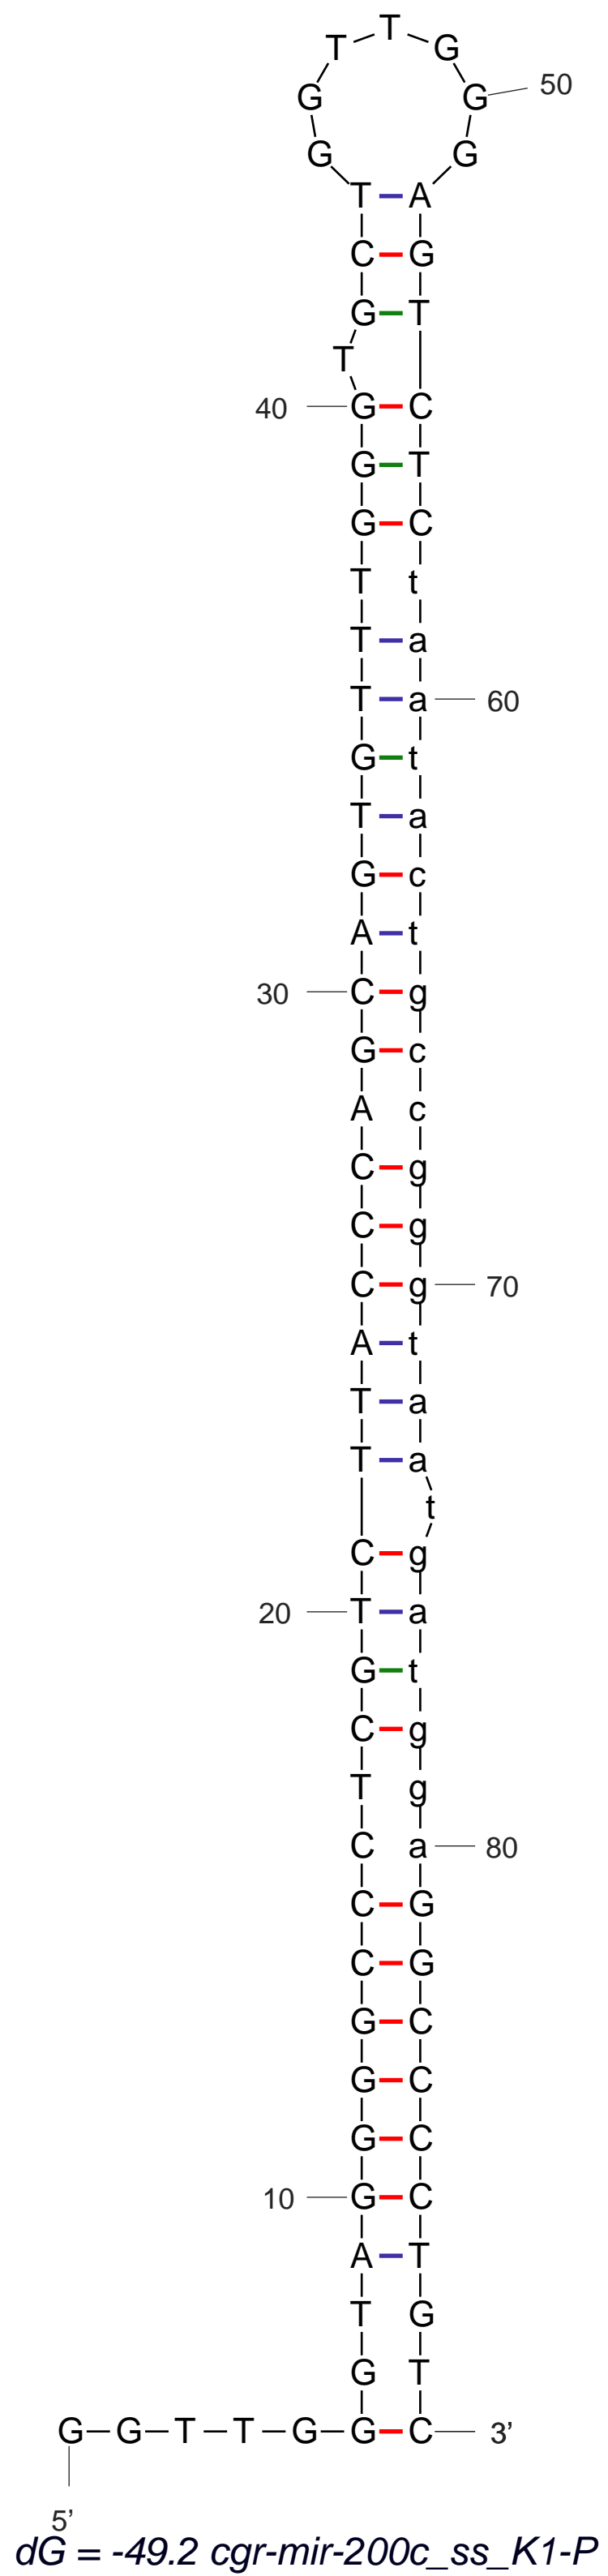



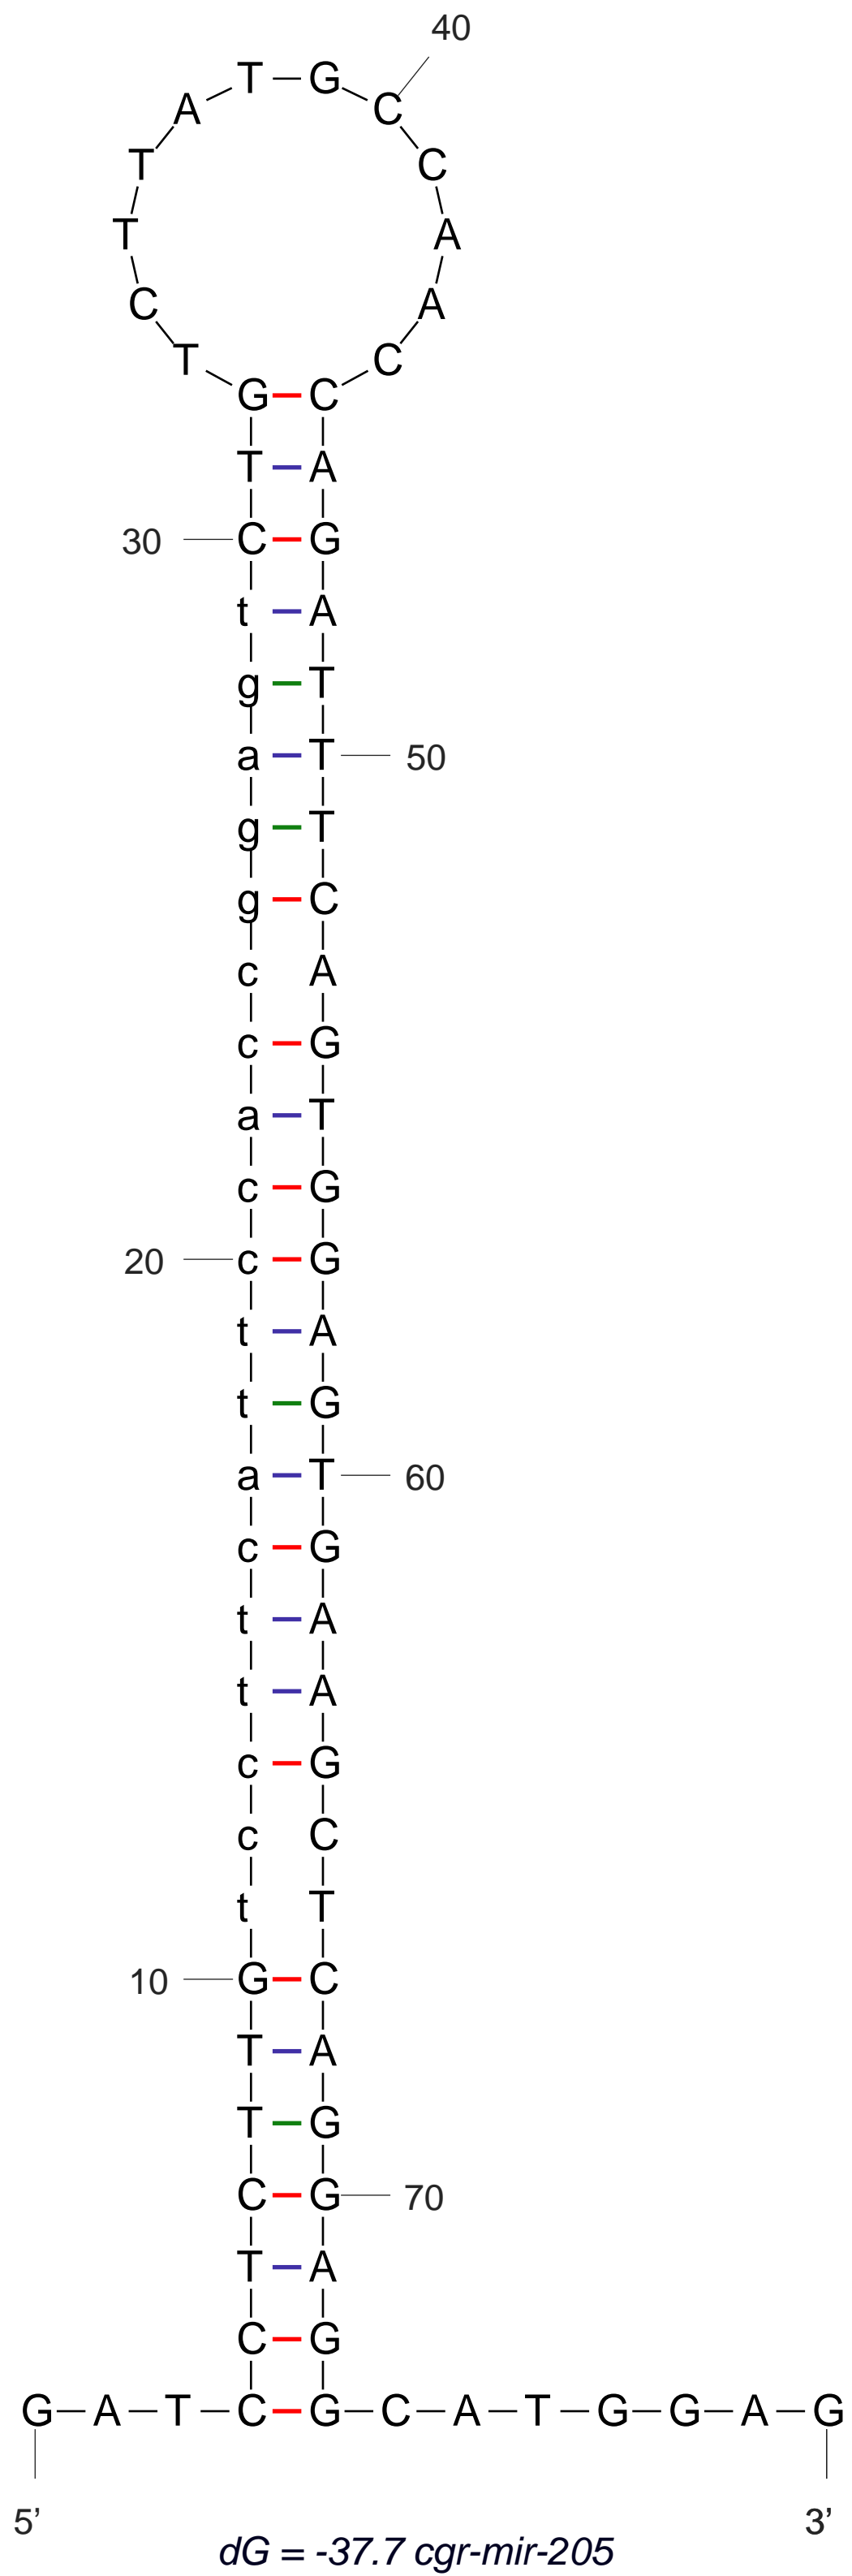



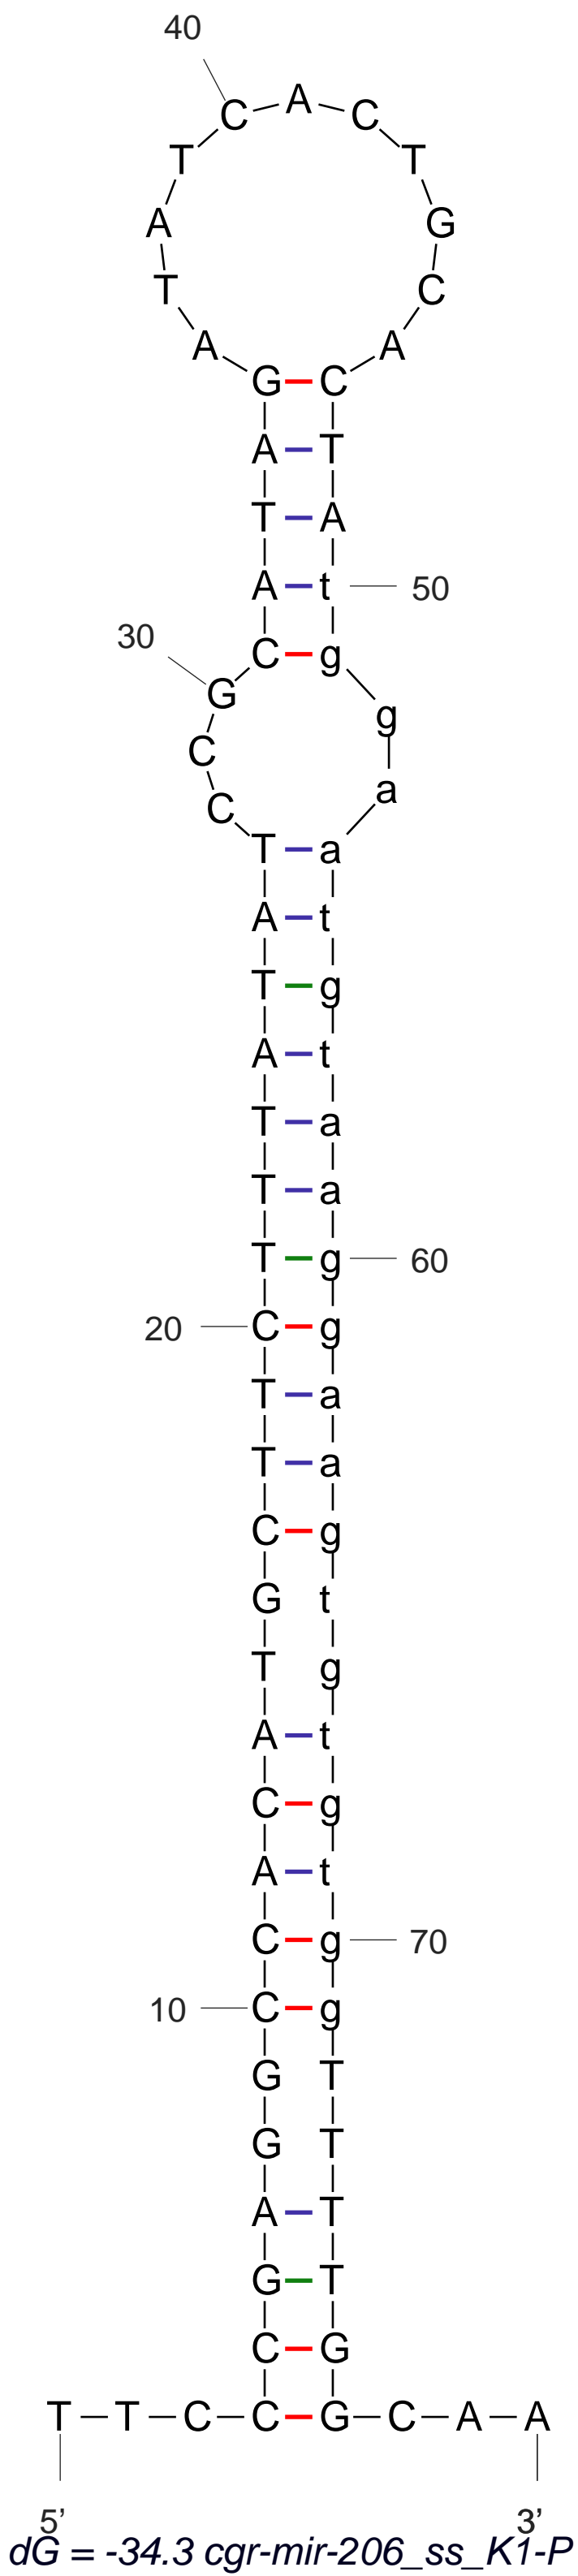

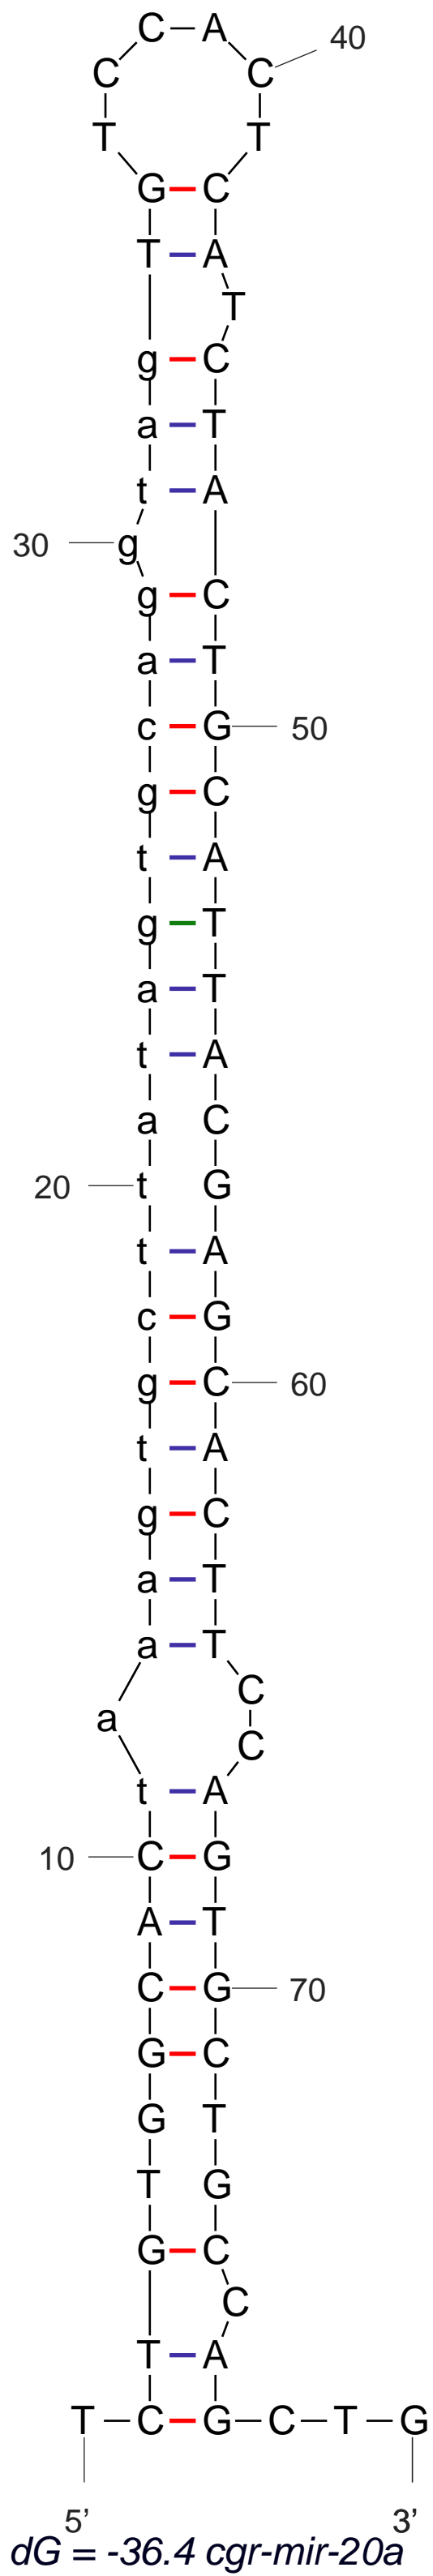

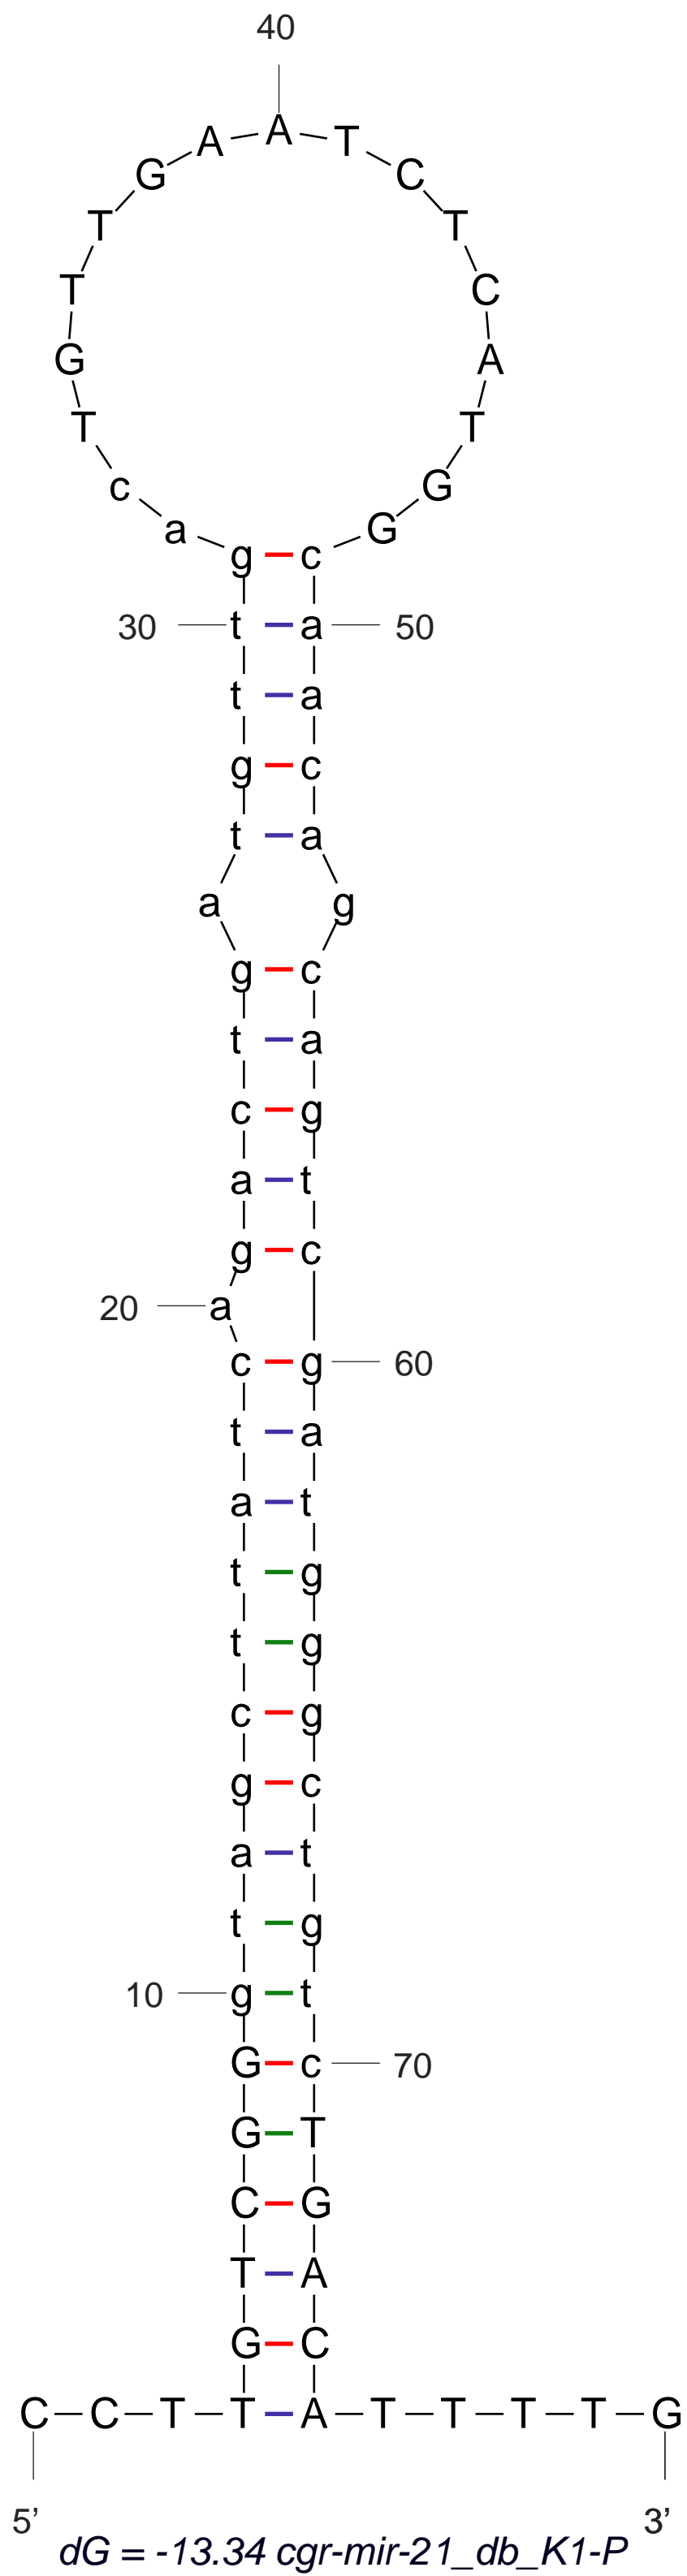

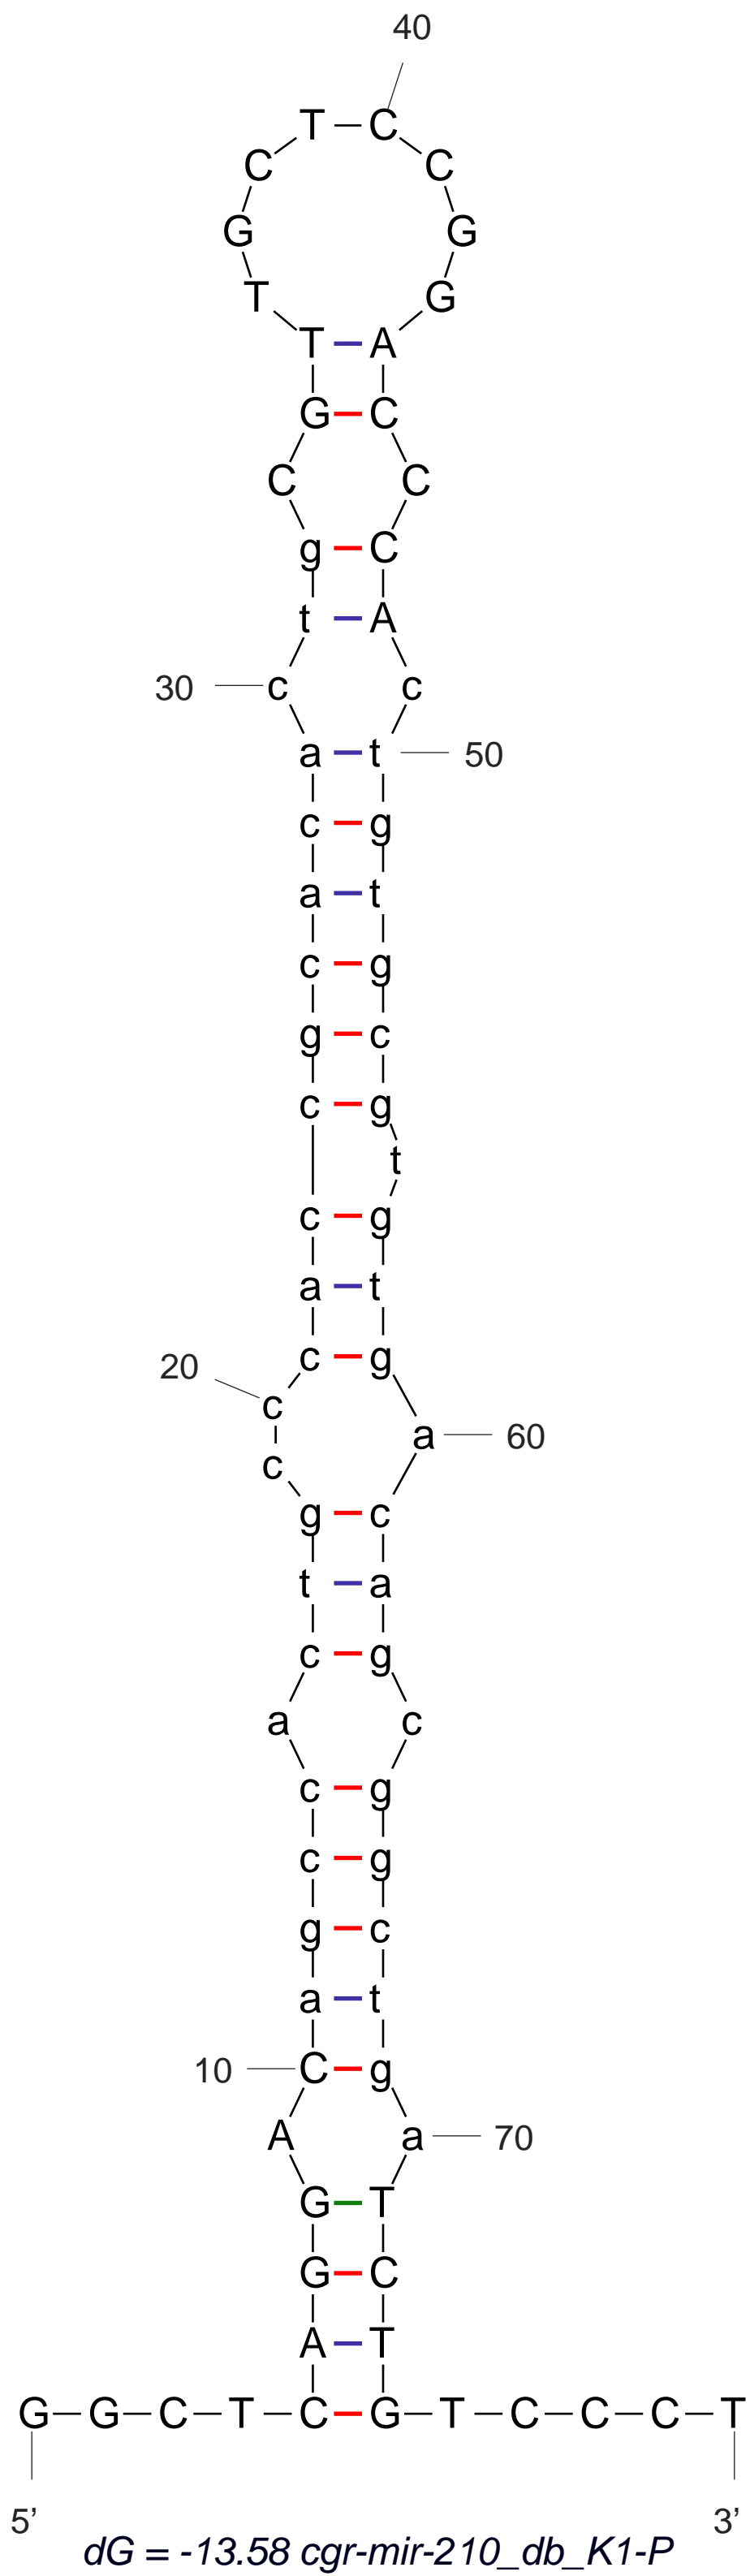

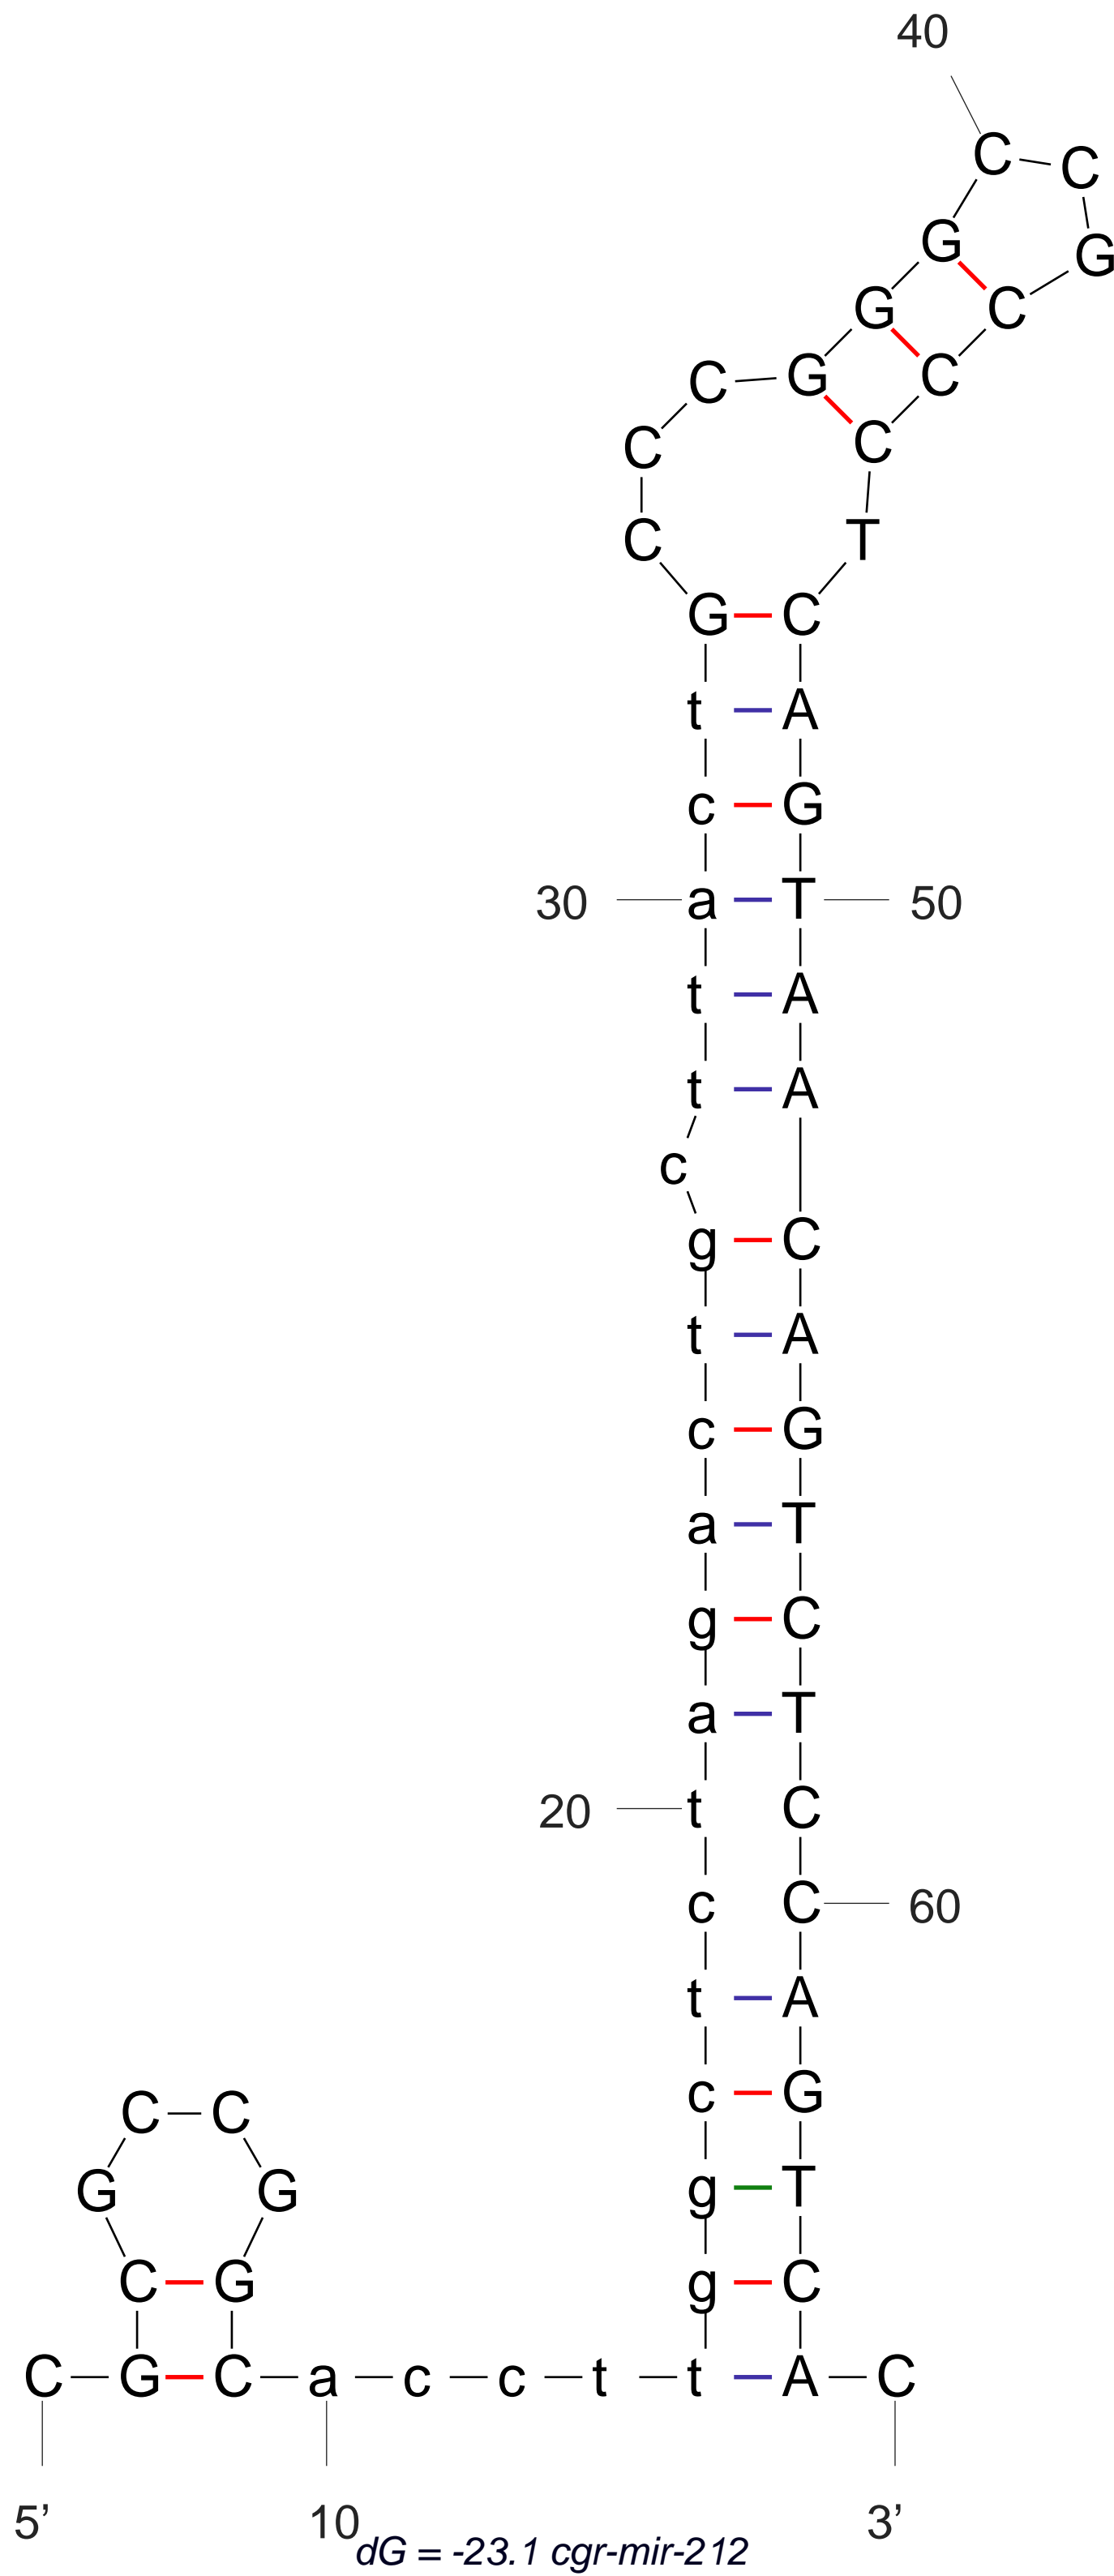

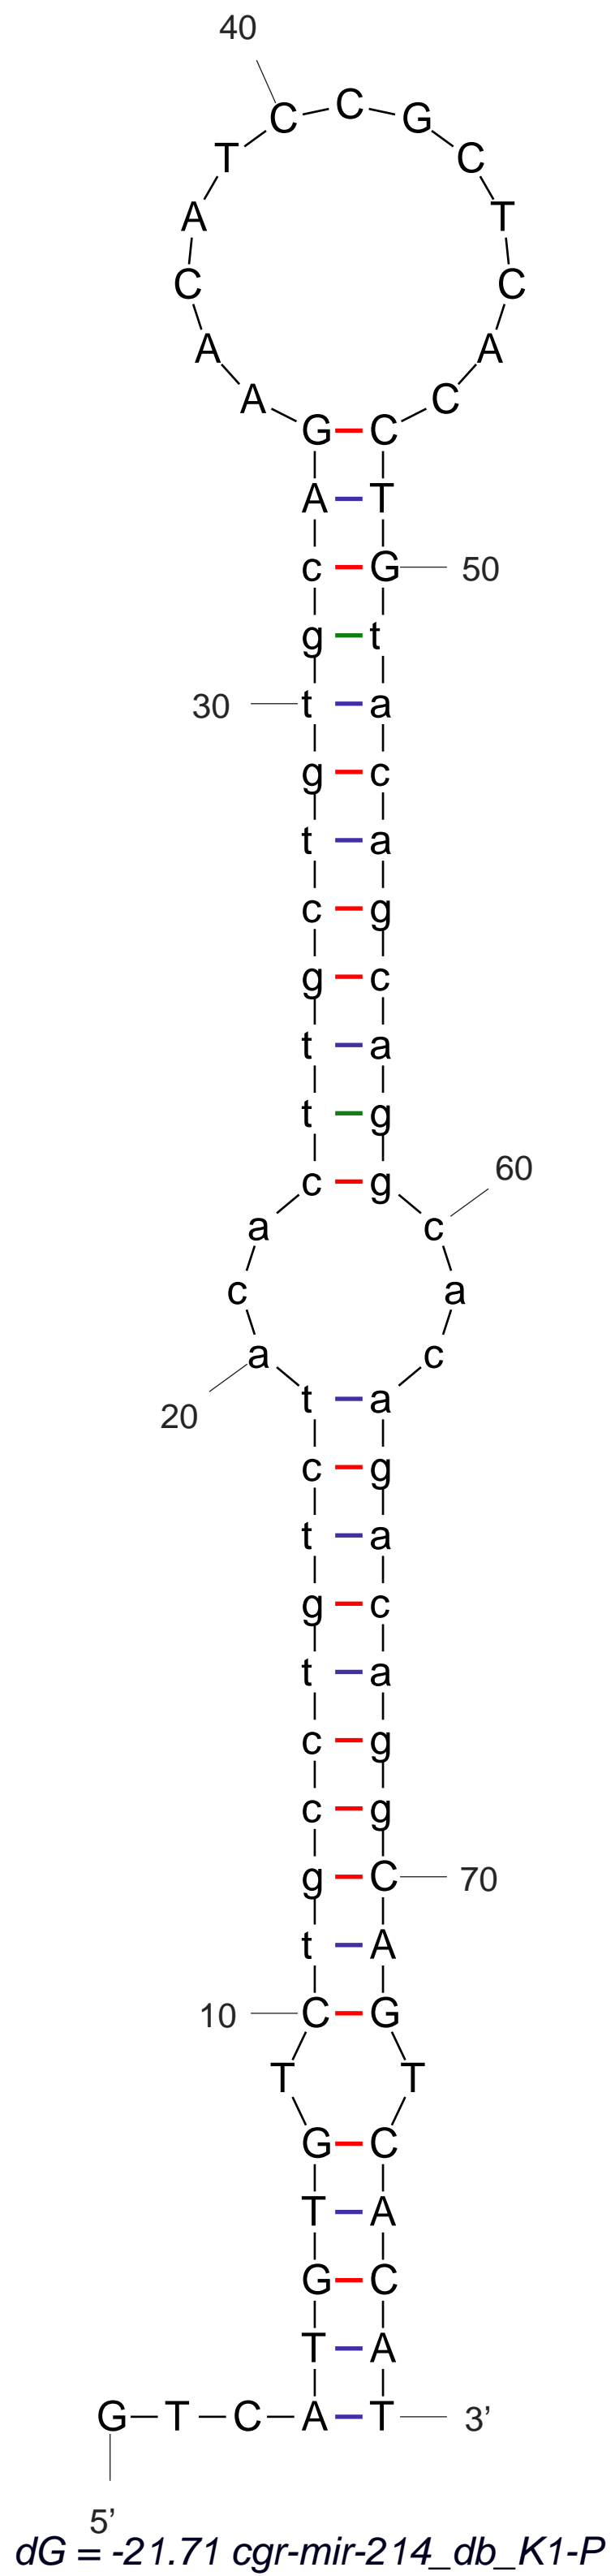

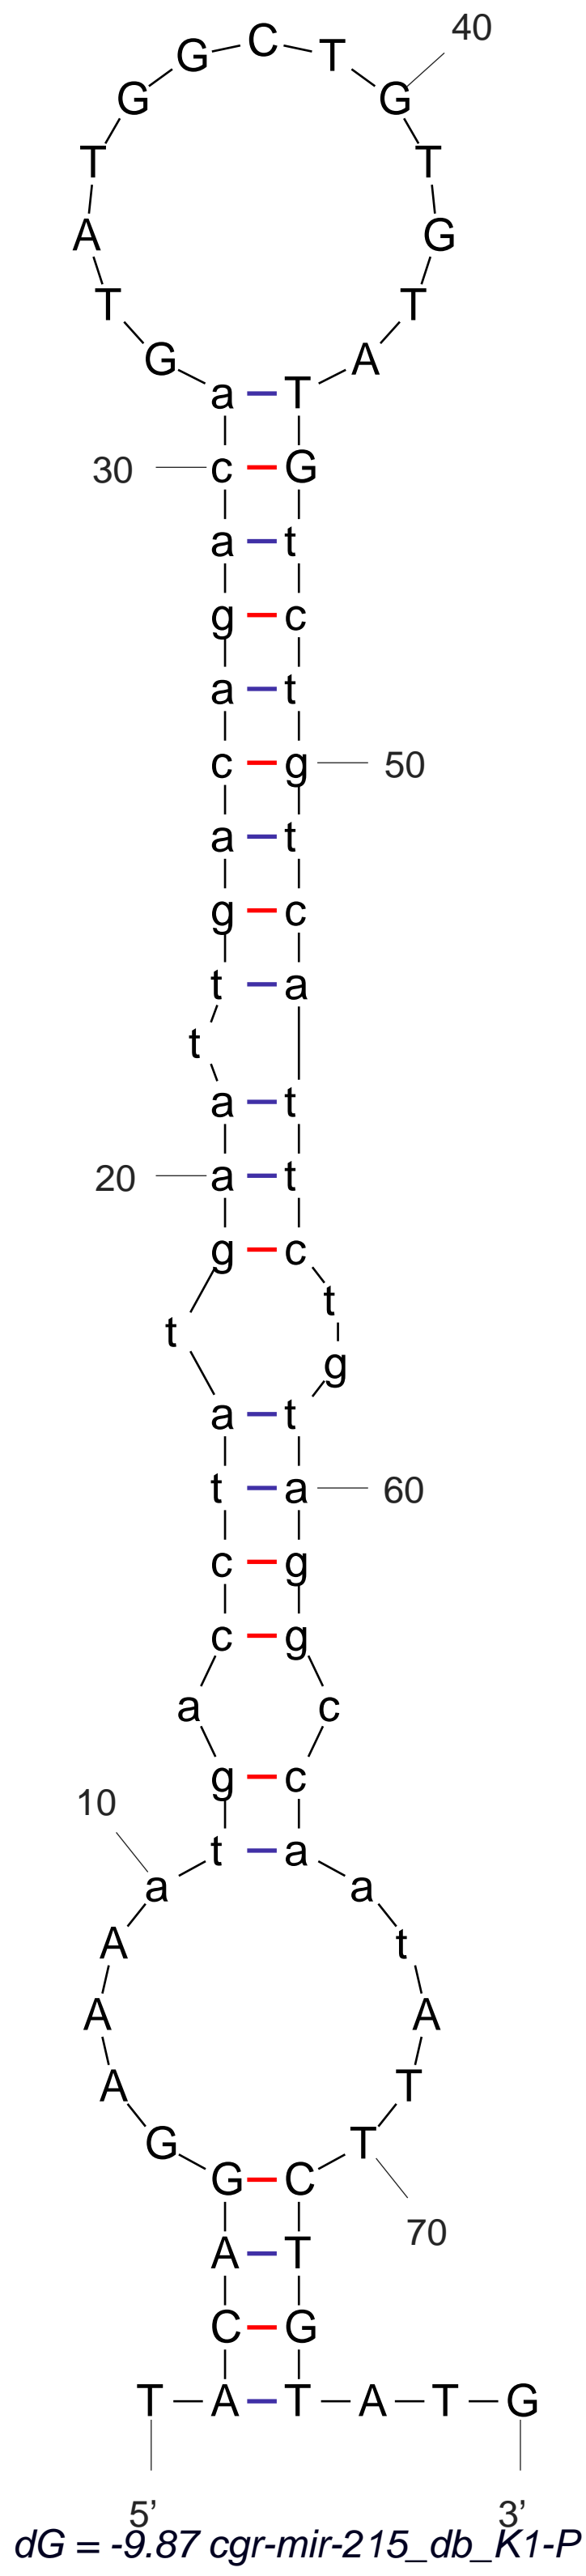

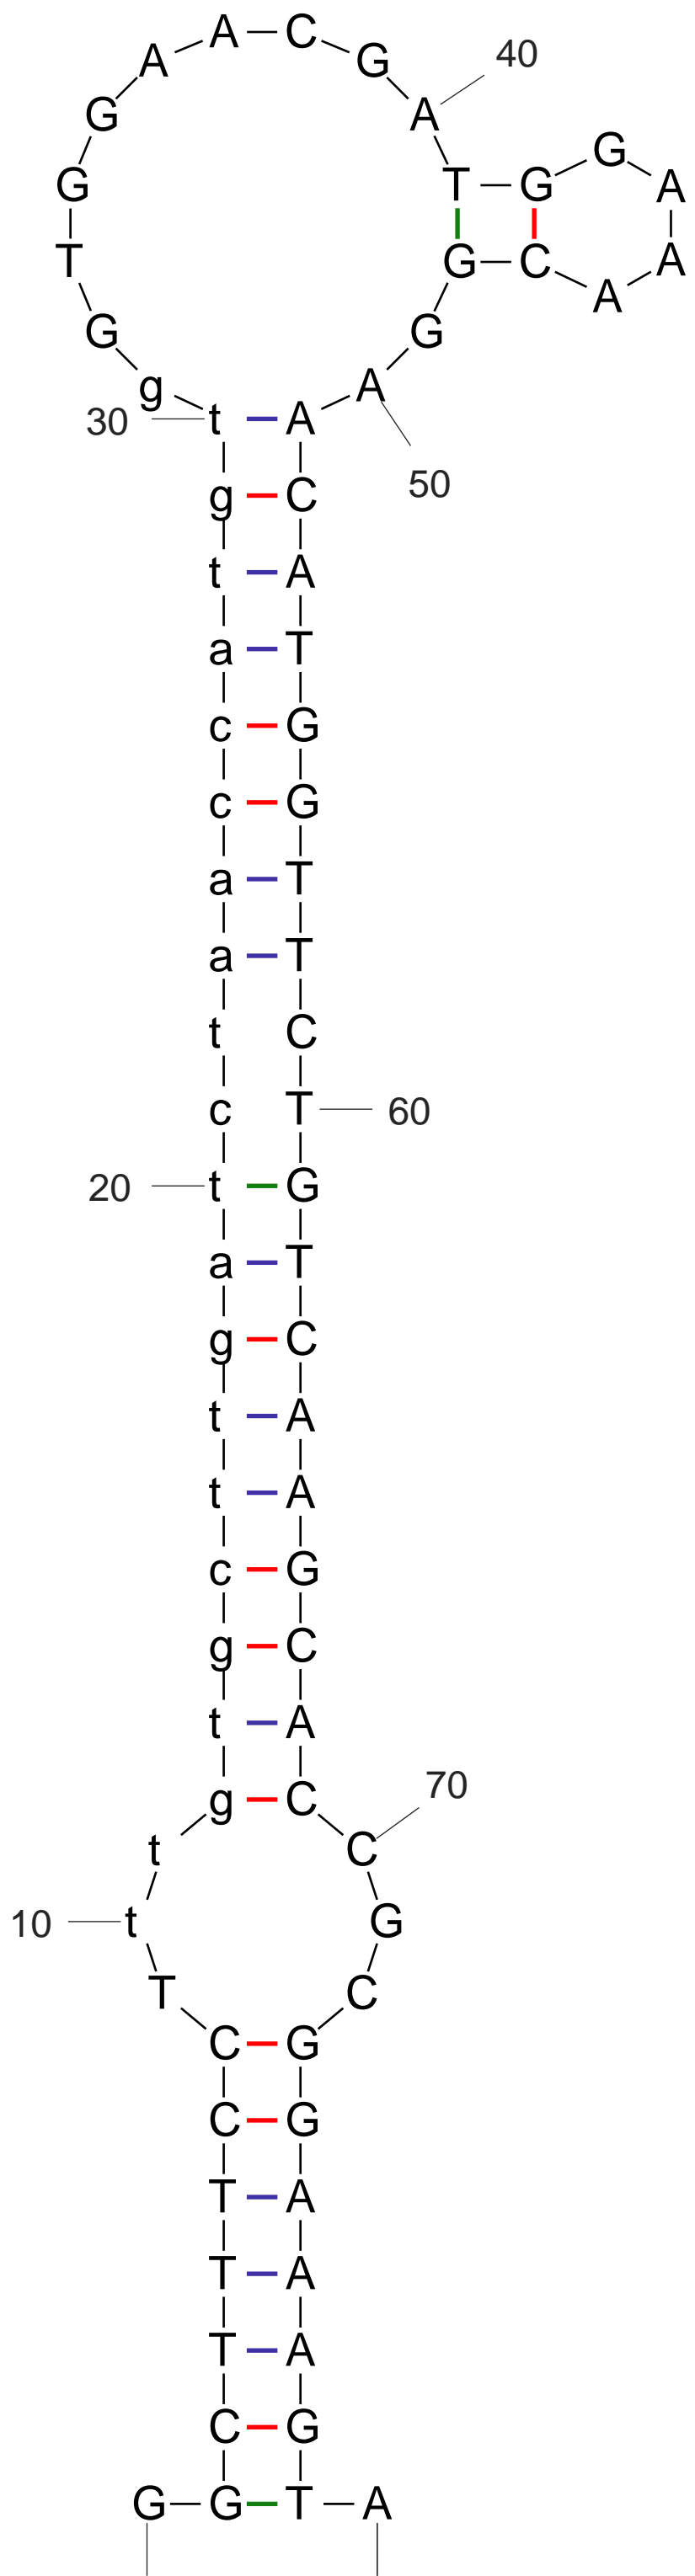



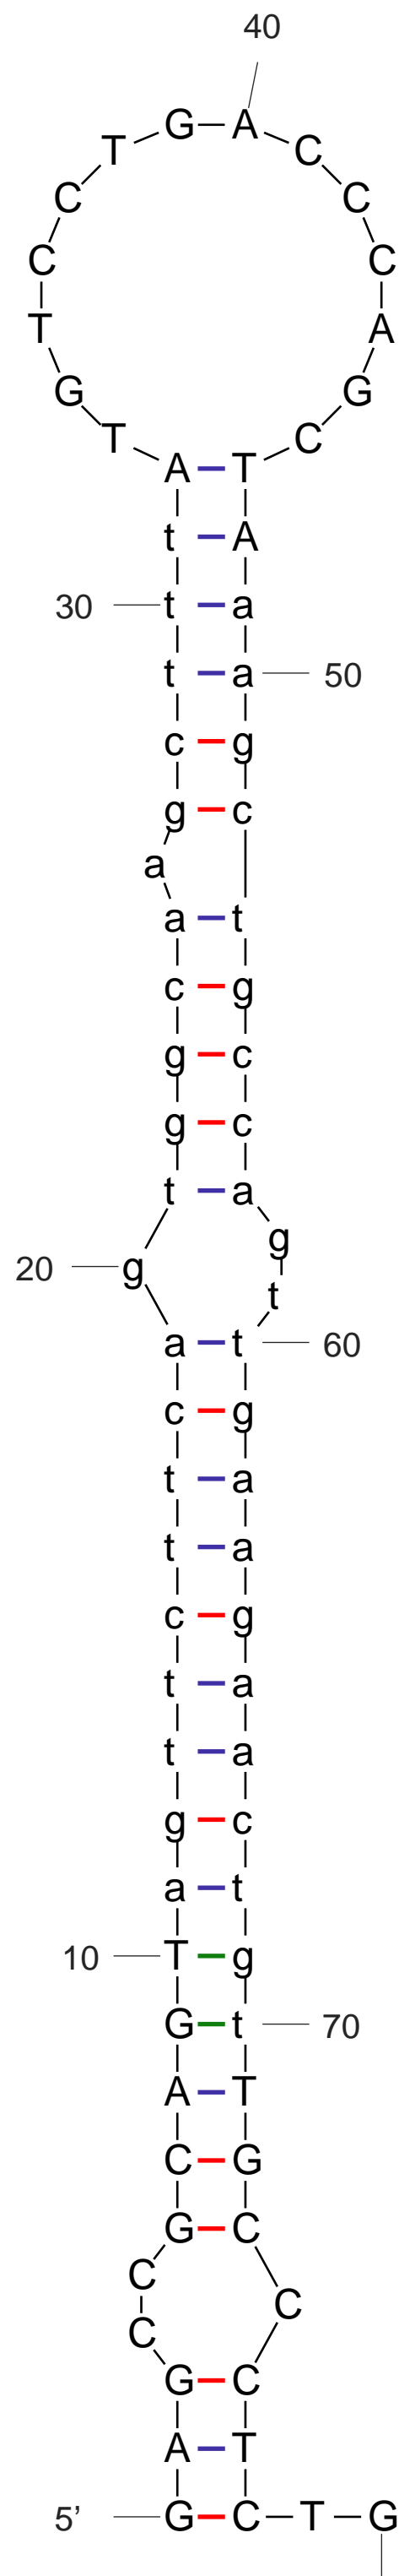

dG = -16.11 *cgr-mir-22\_db\_K1-P*

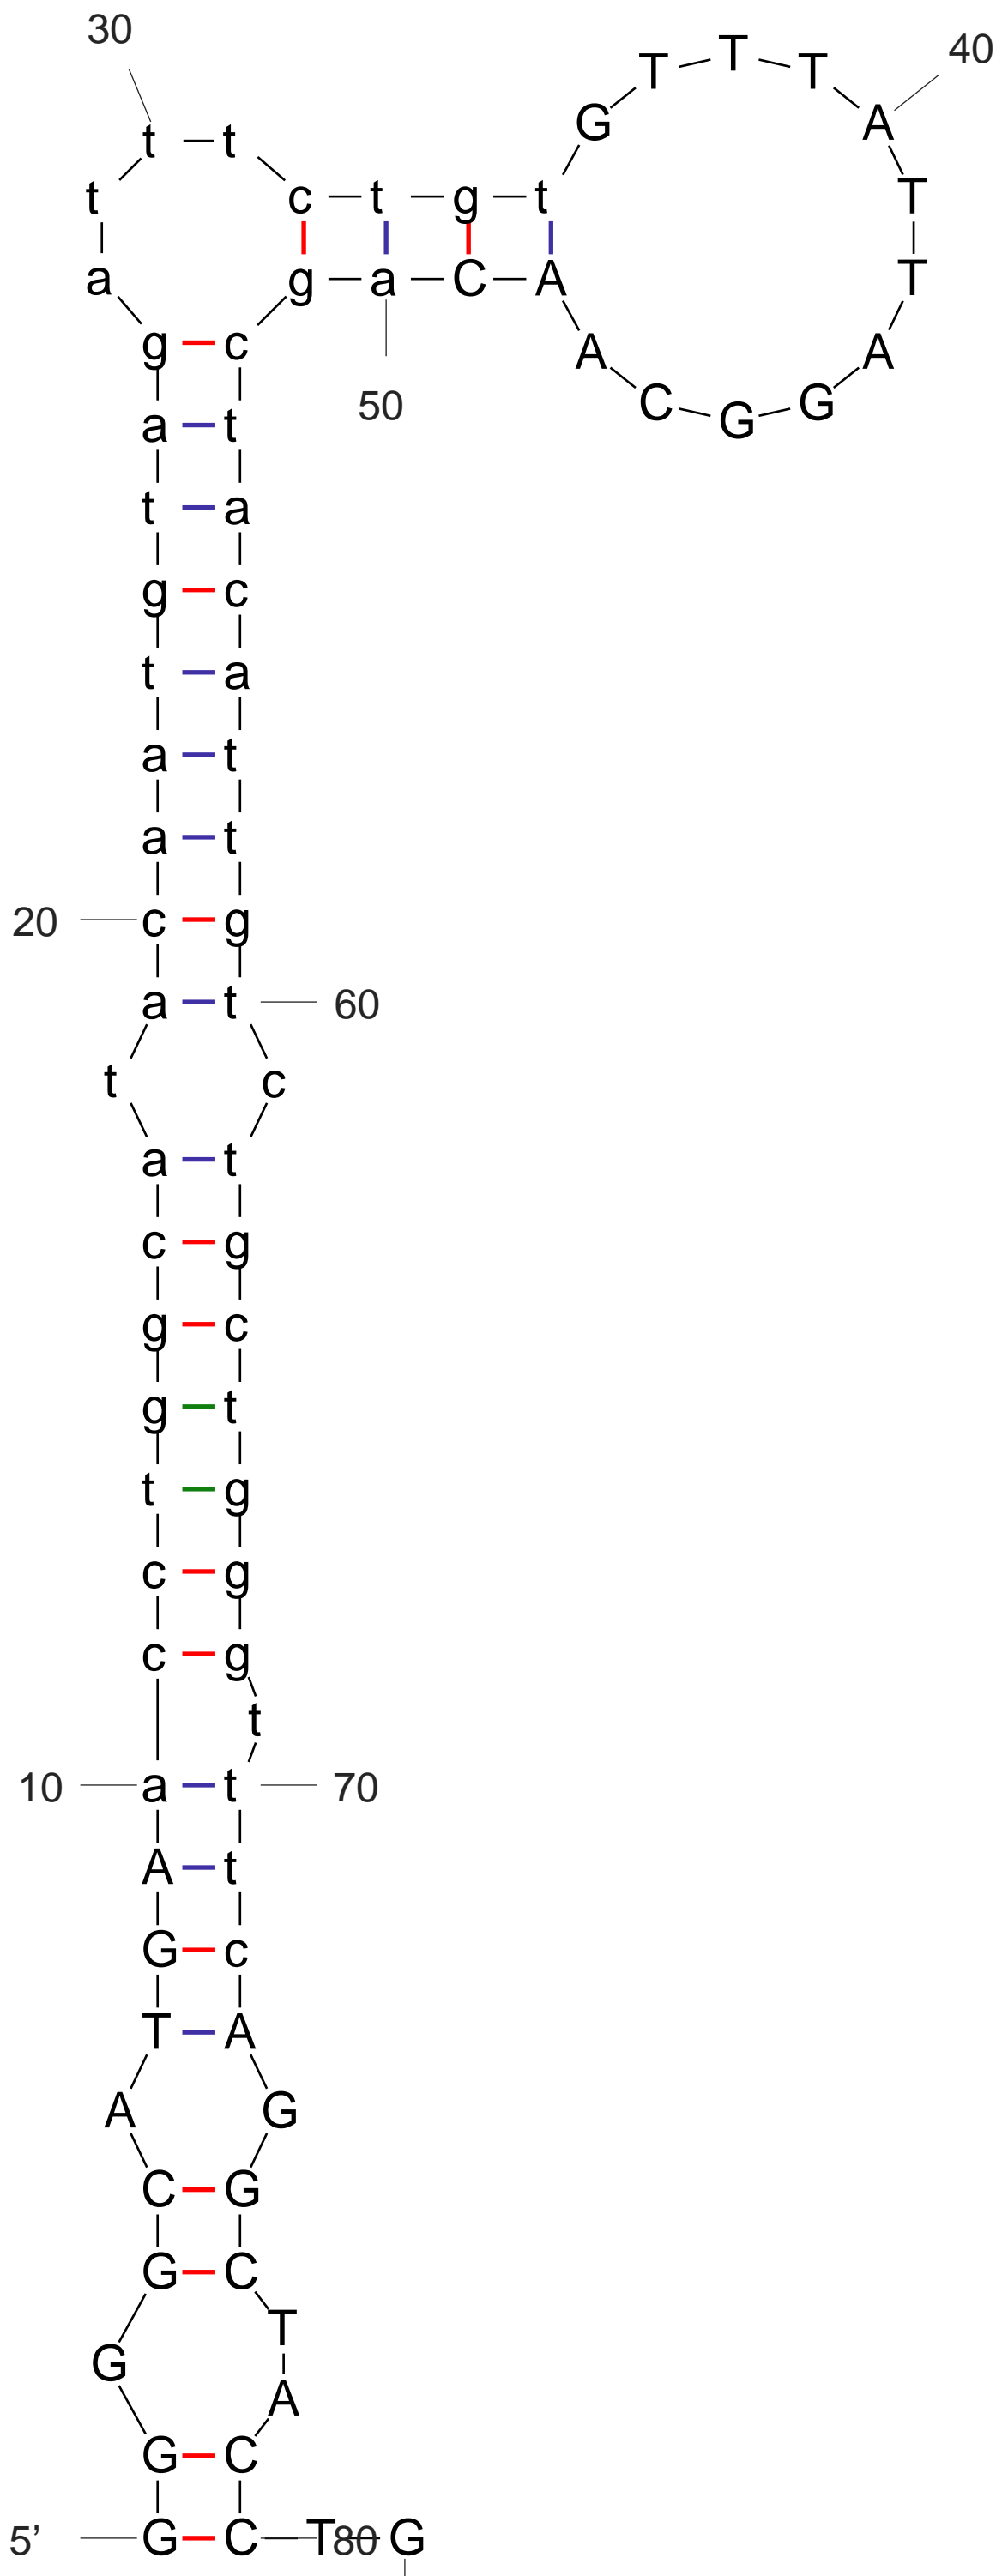

dG = -14.58 *cgr-mir-221\_db\_K1-P*

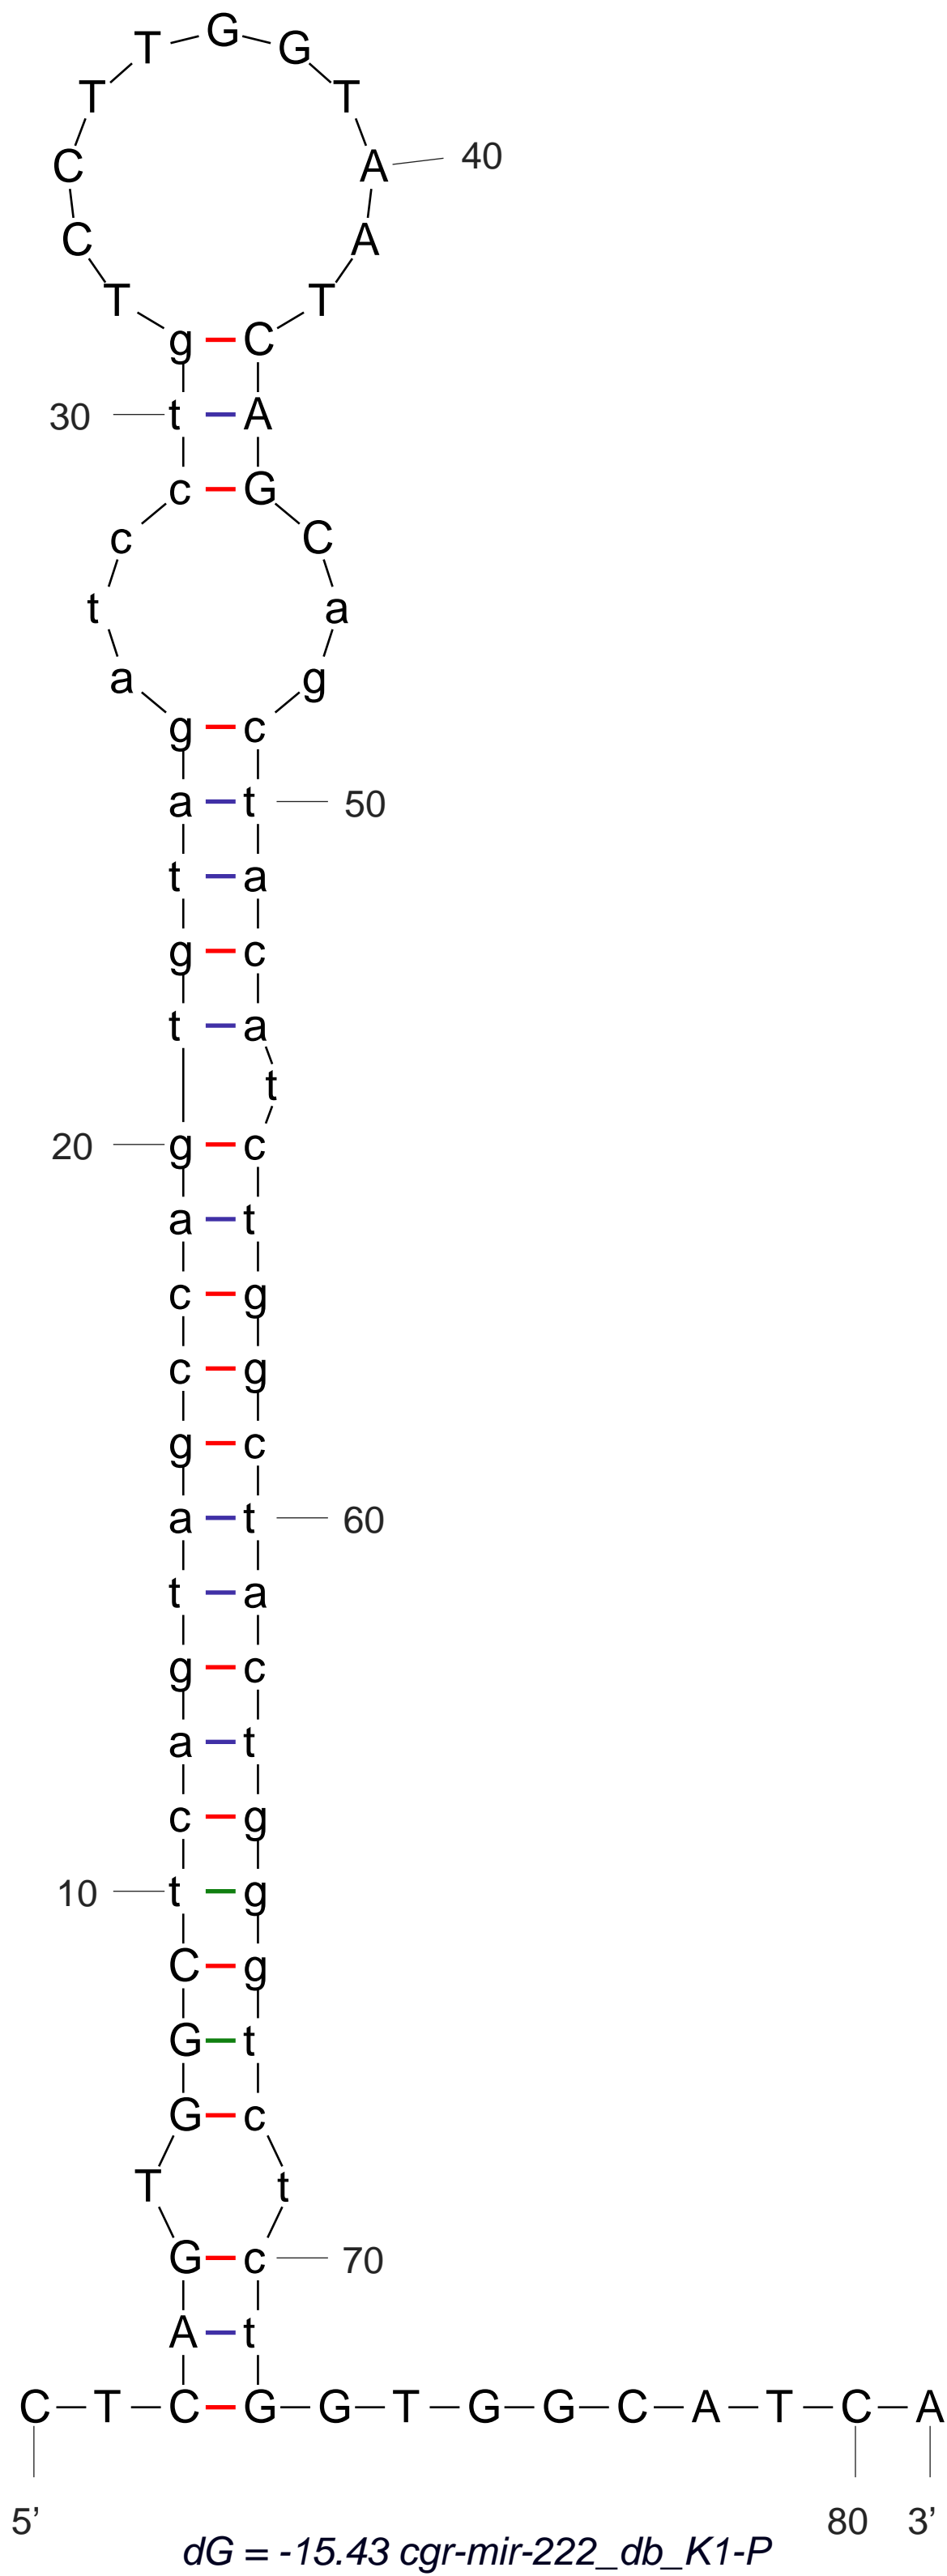

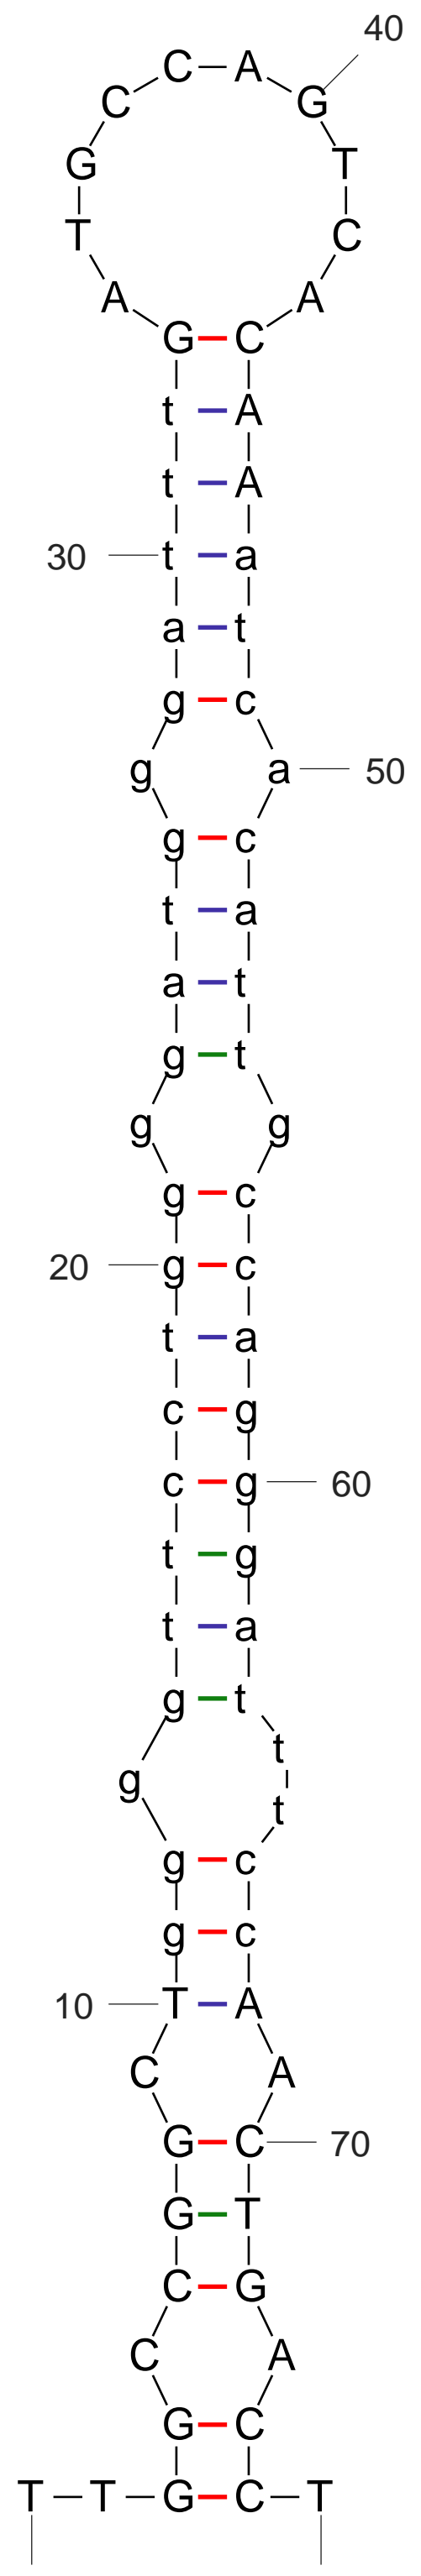

$dG = -12.57$  *cgr-mir-23a\_db\_K1-P*

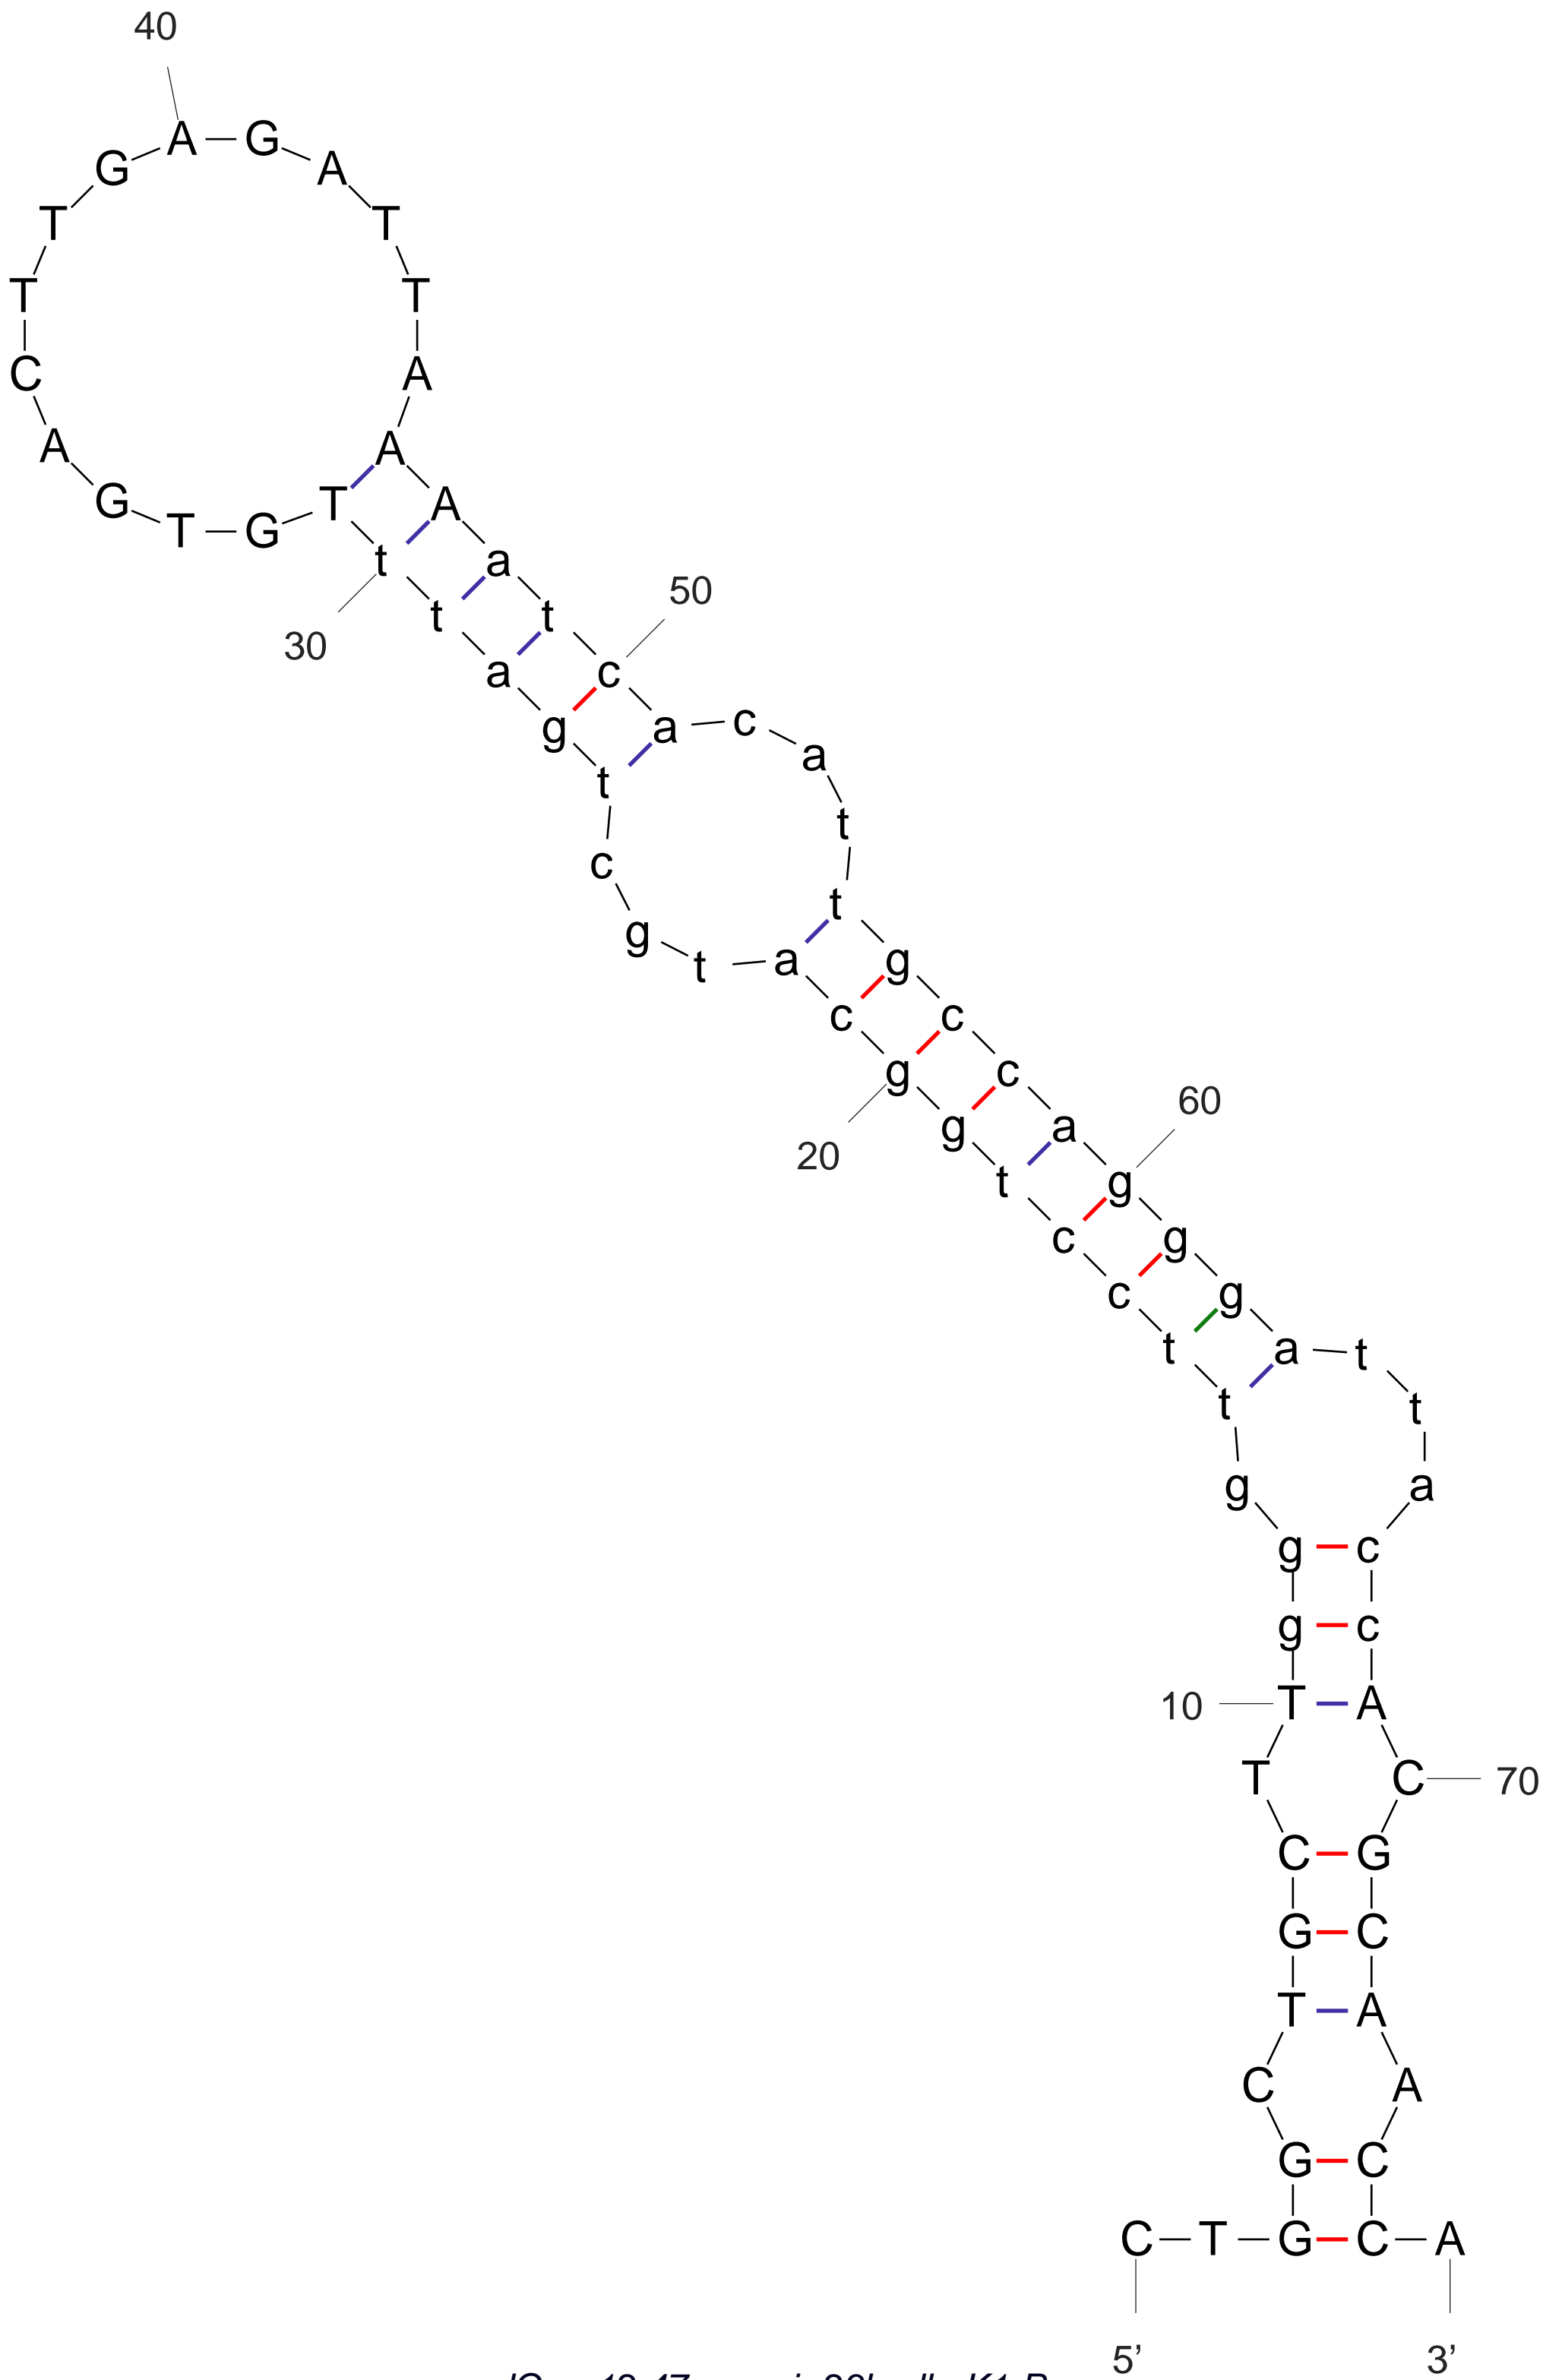

dG = -12.47 cgr-mir-23b\_db\_K1-P

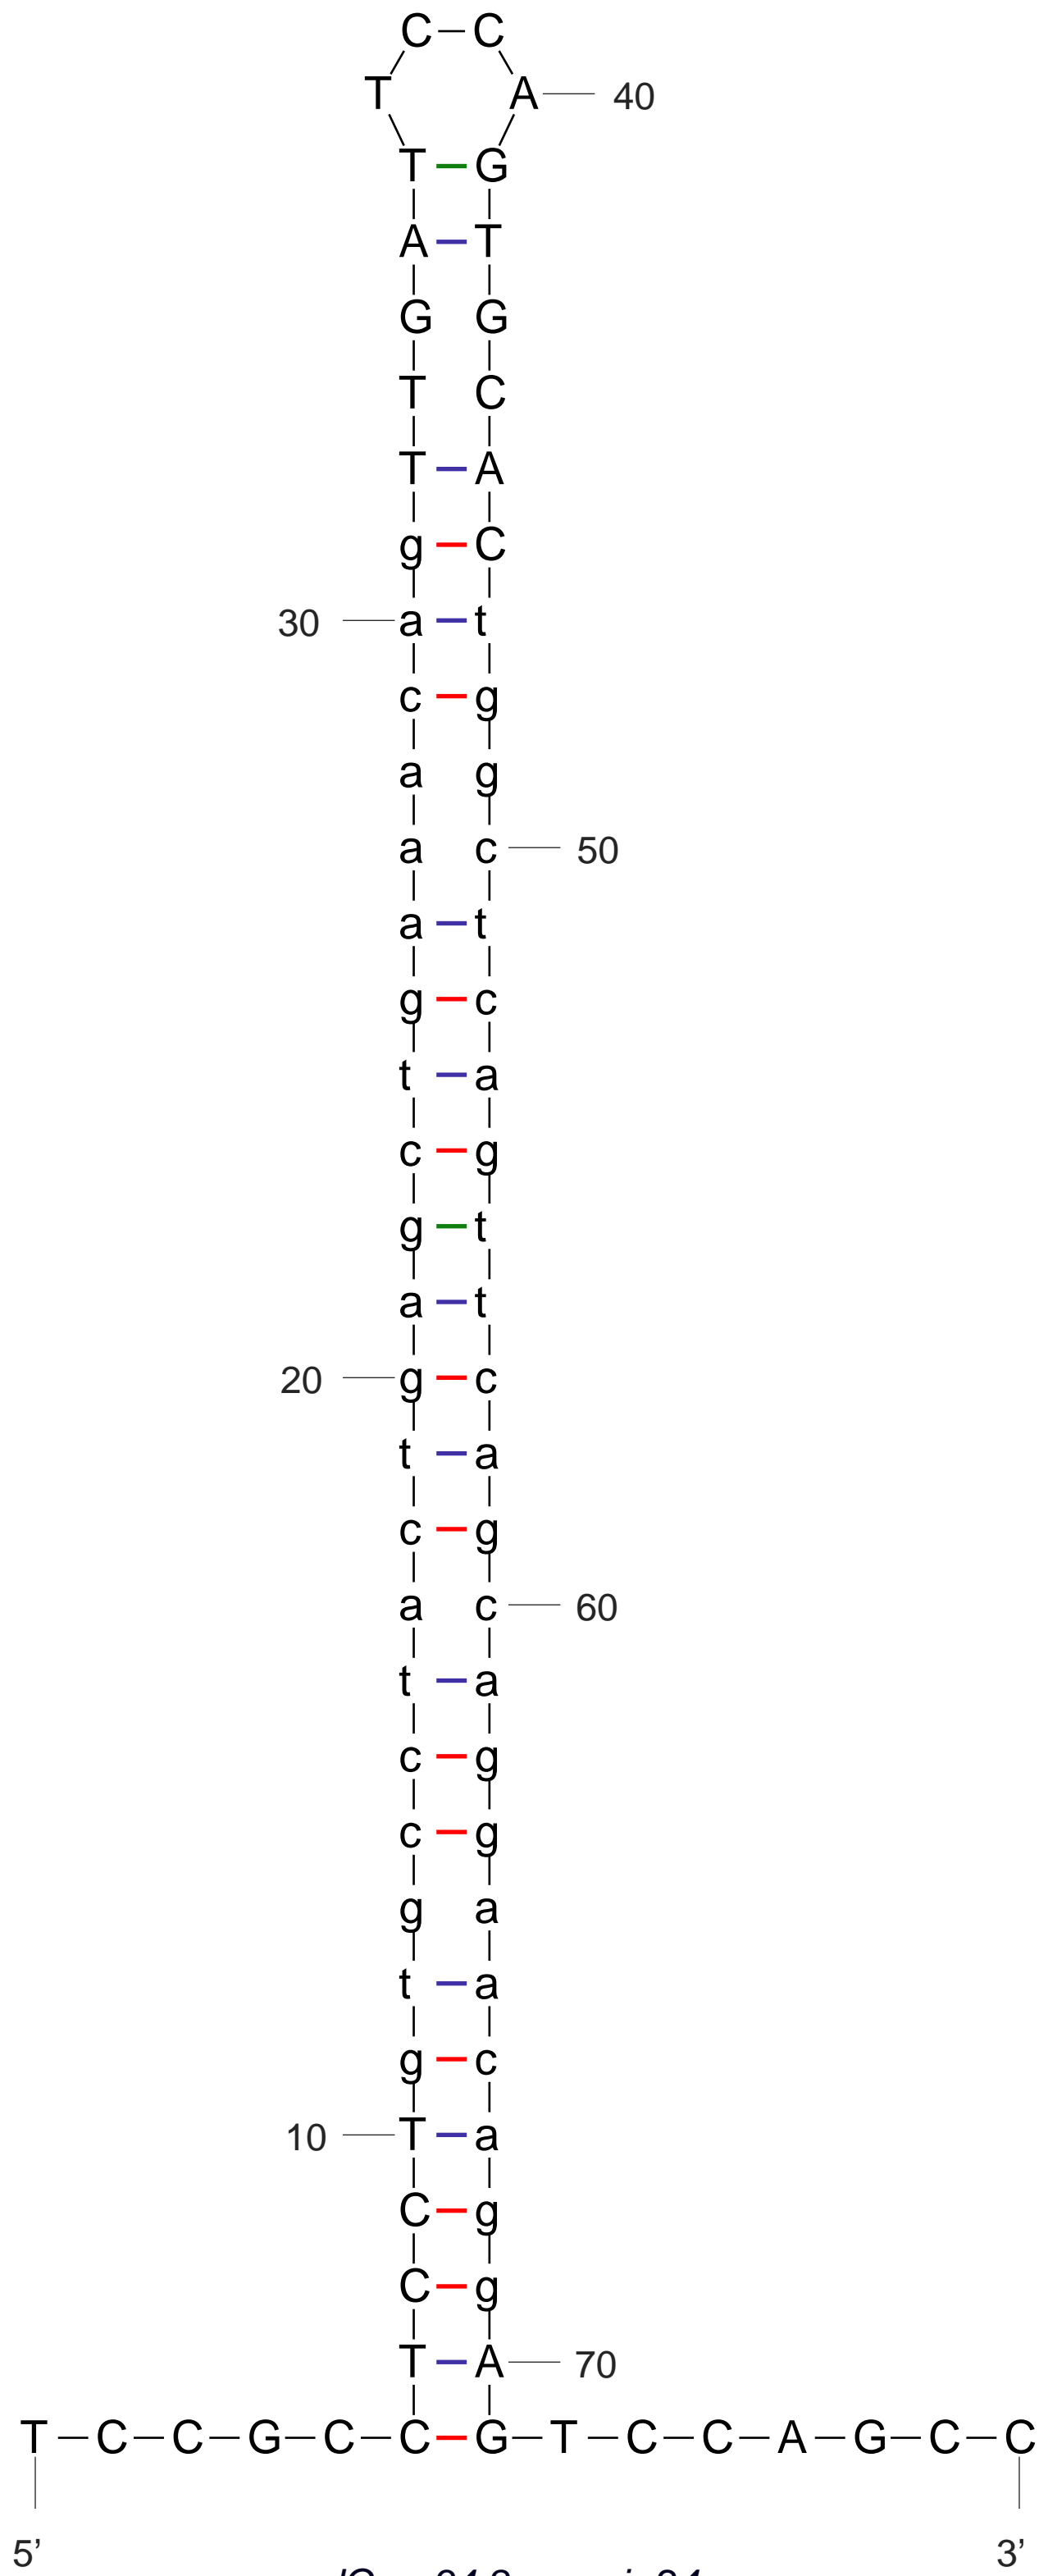

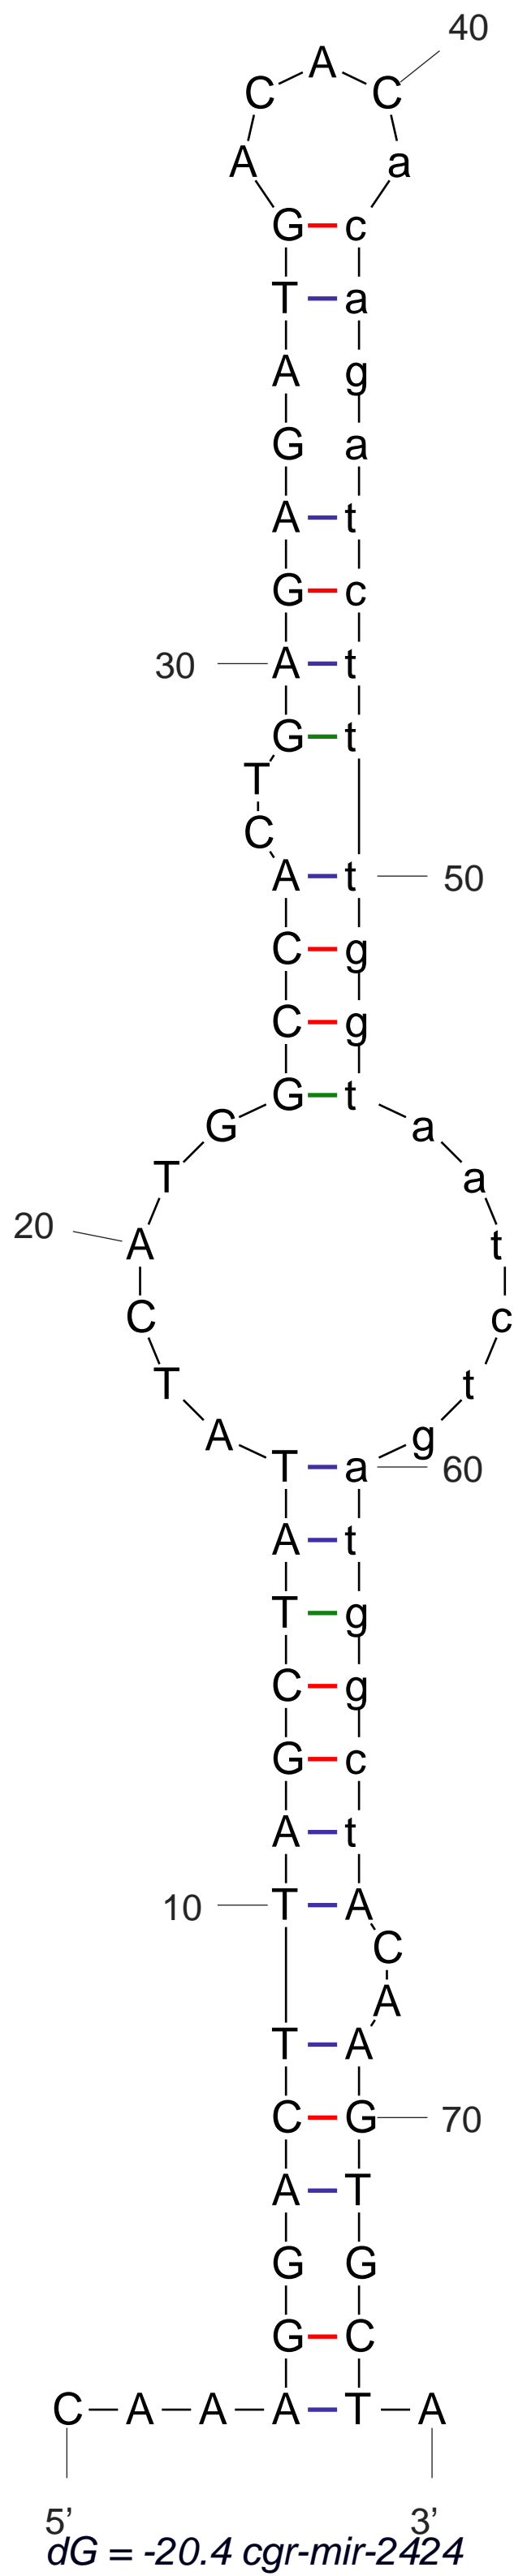

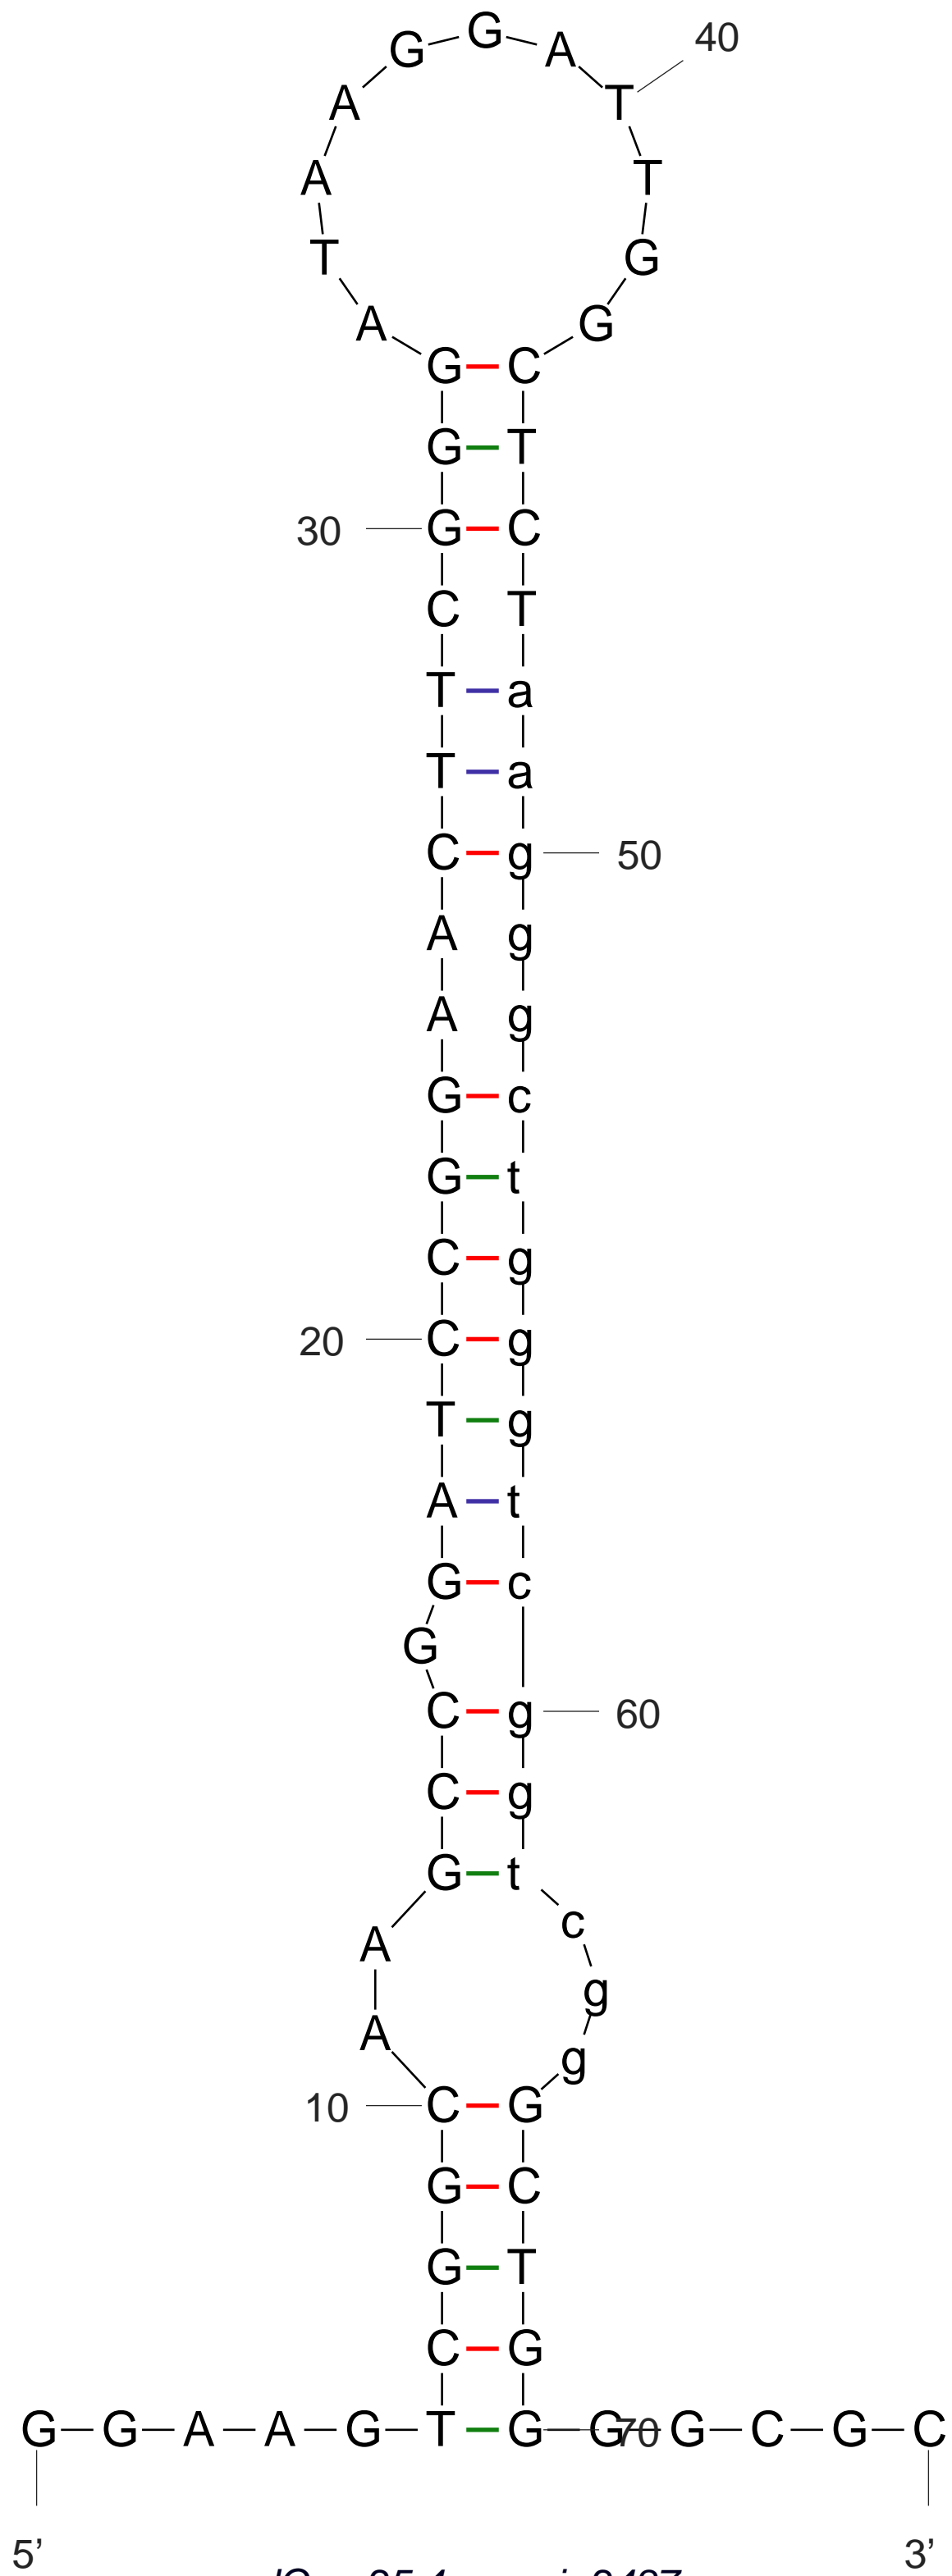



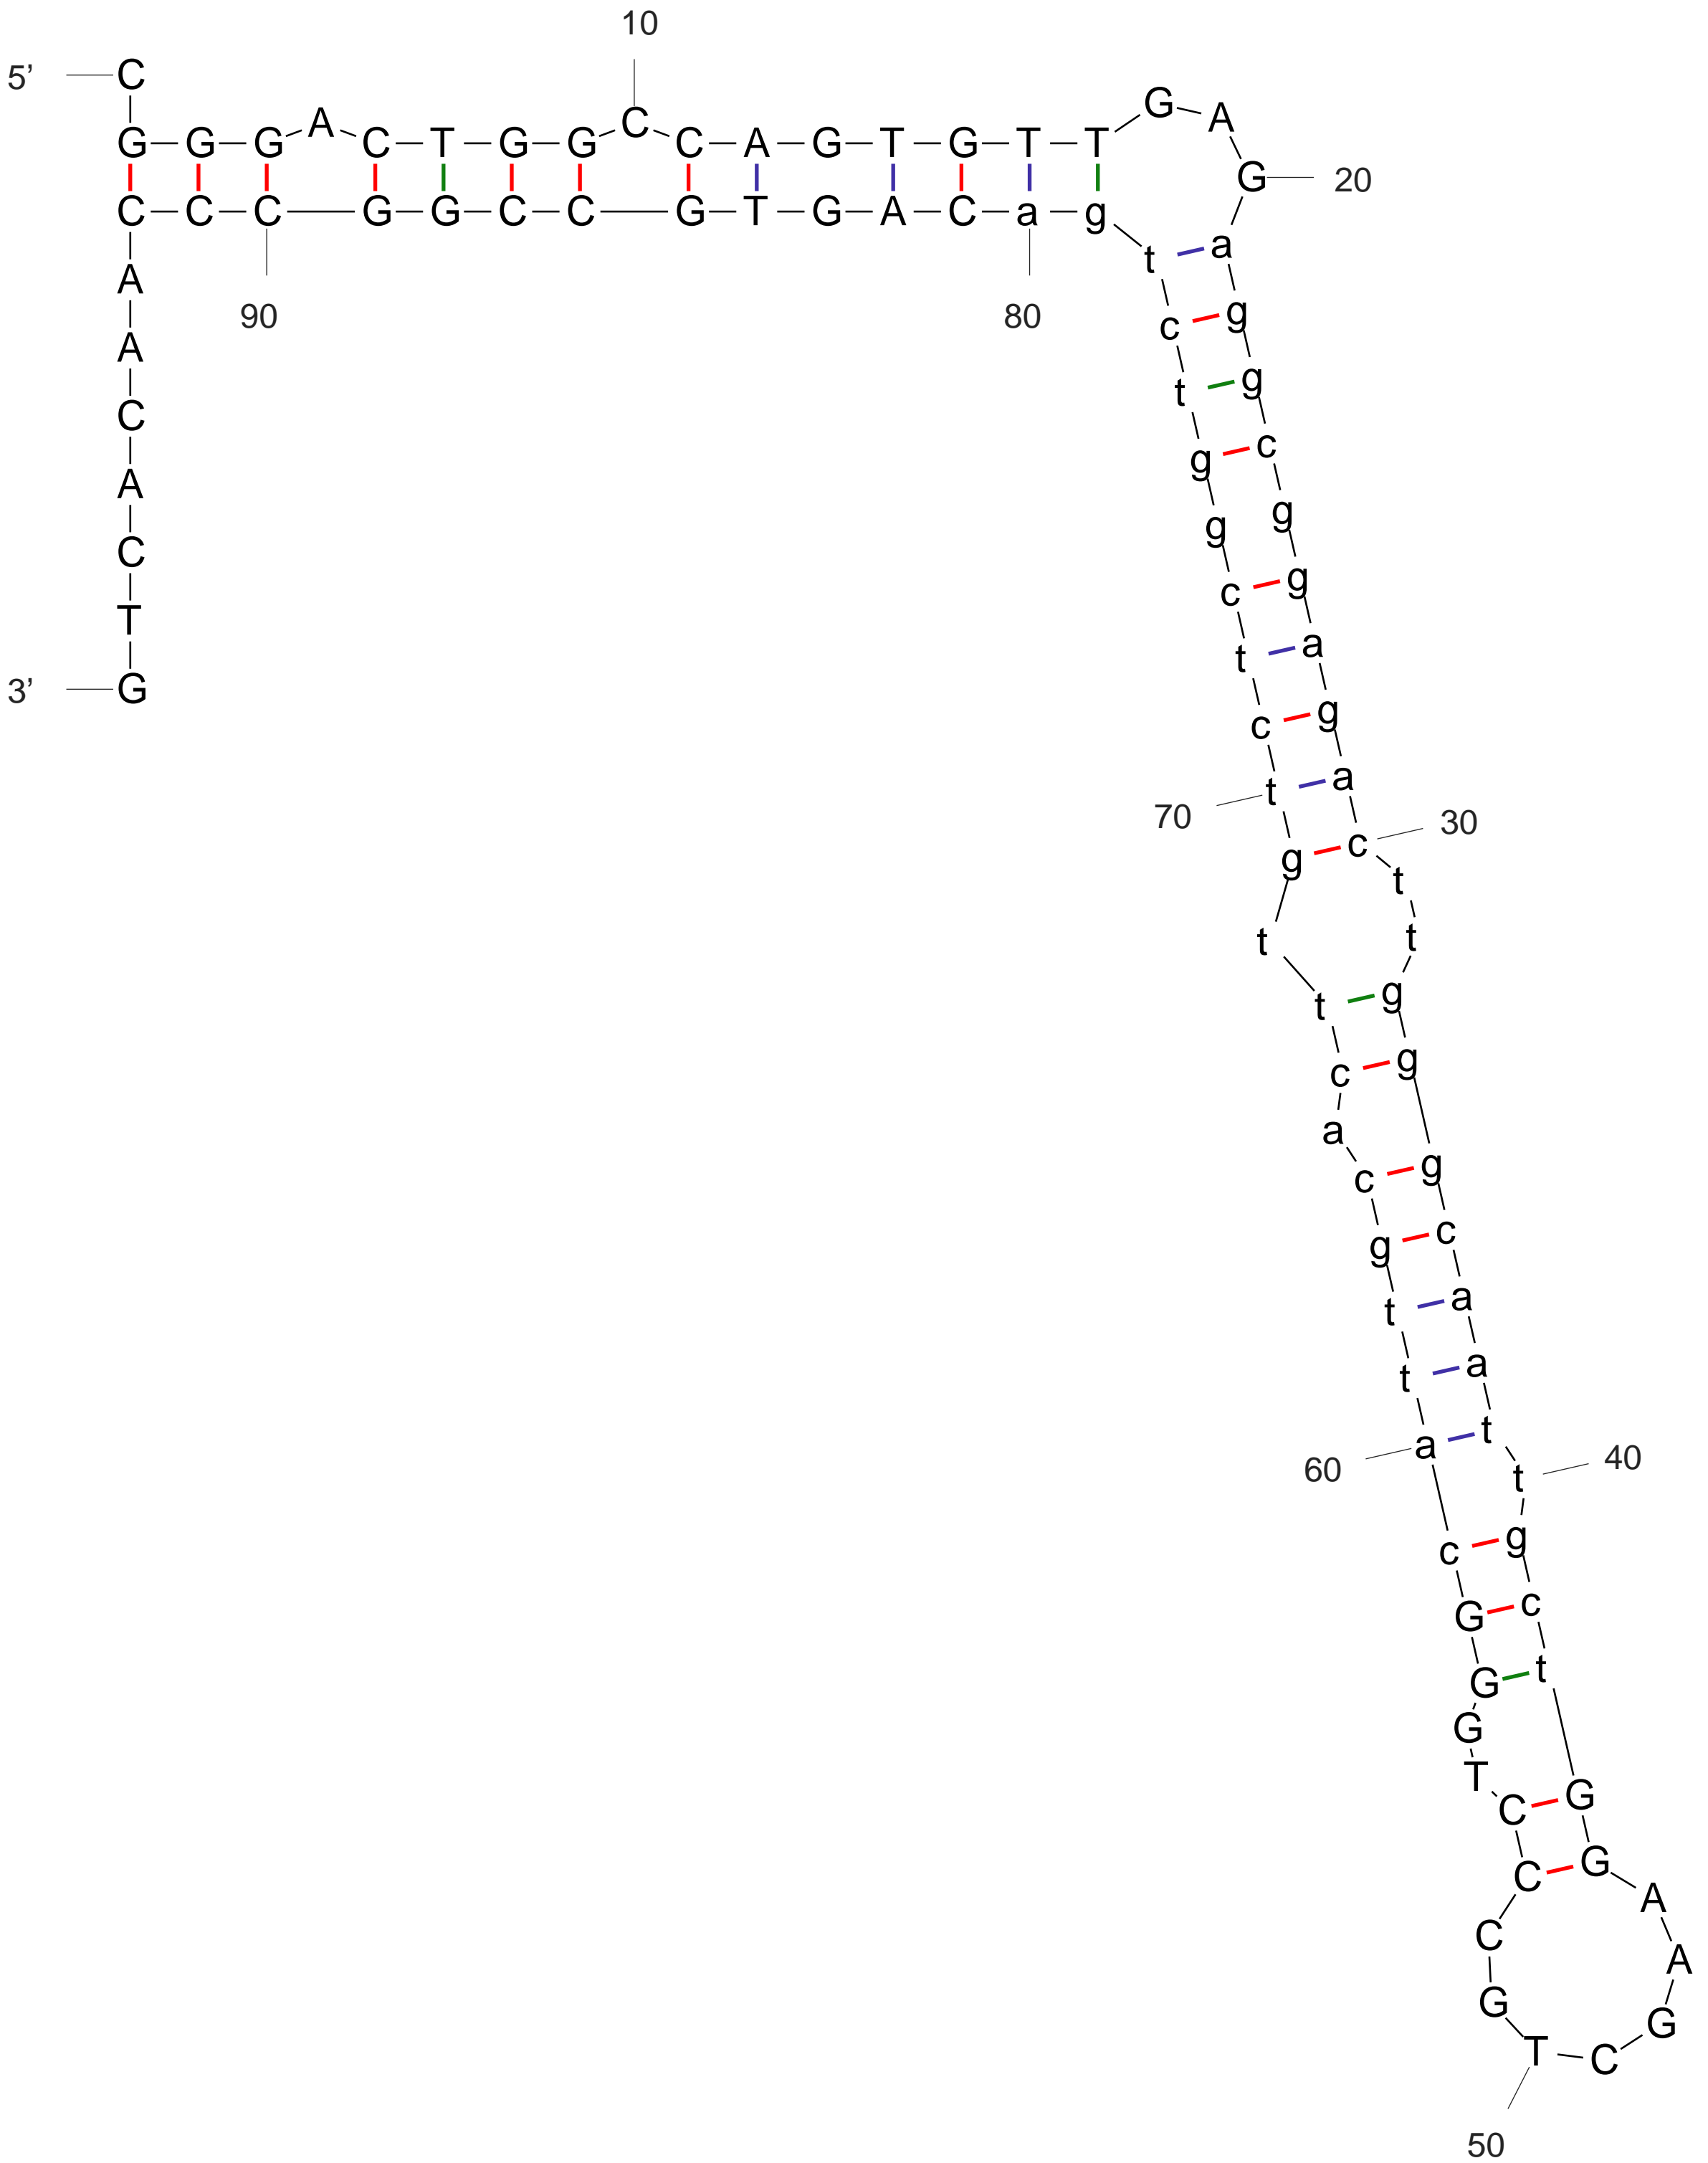

dG = -41.3 *cgr-mir-25*



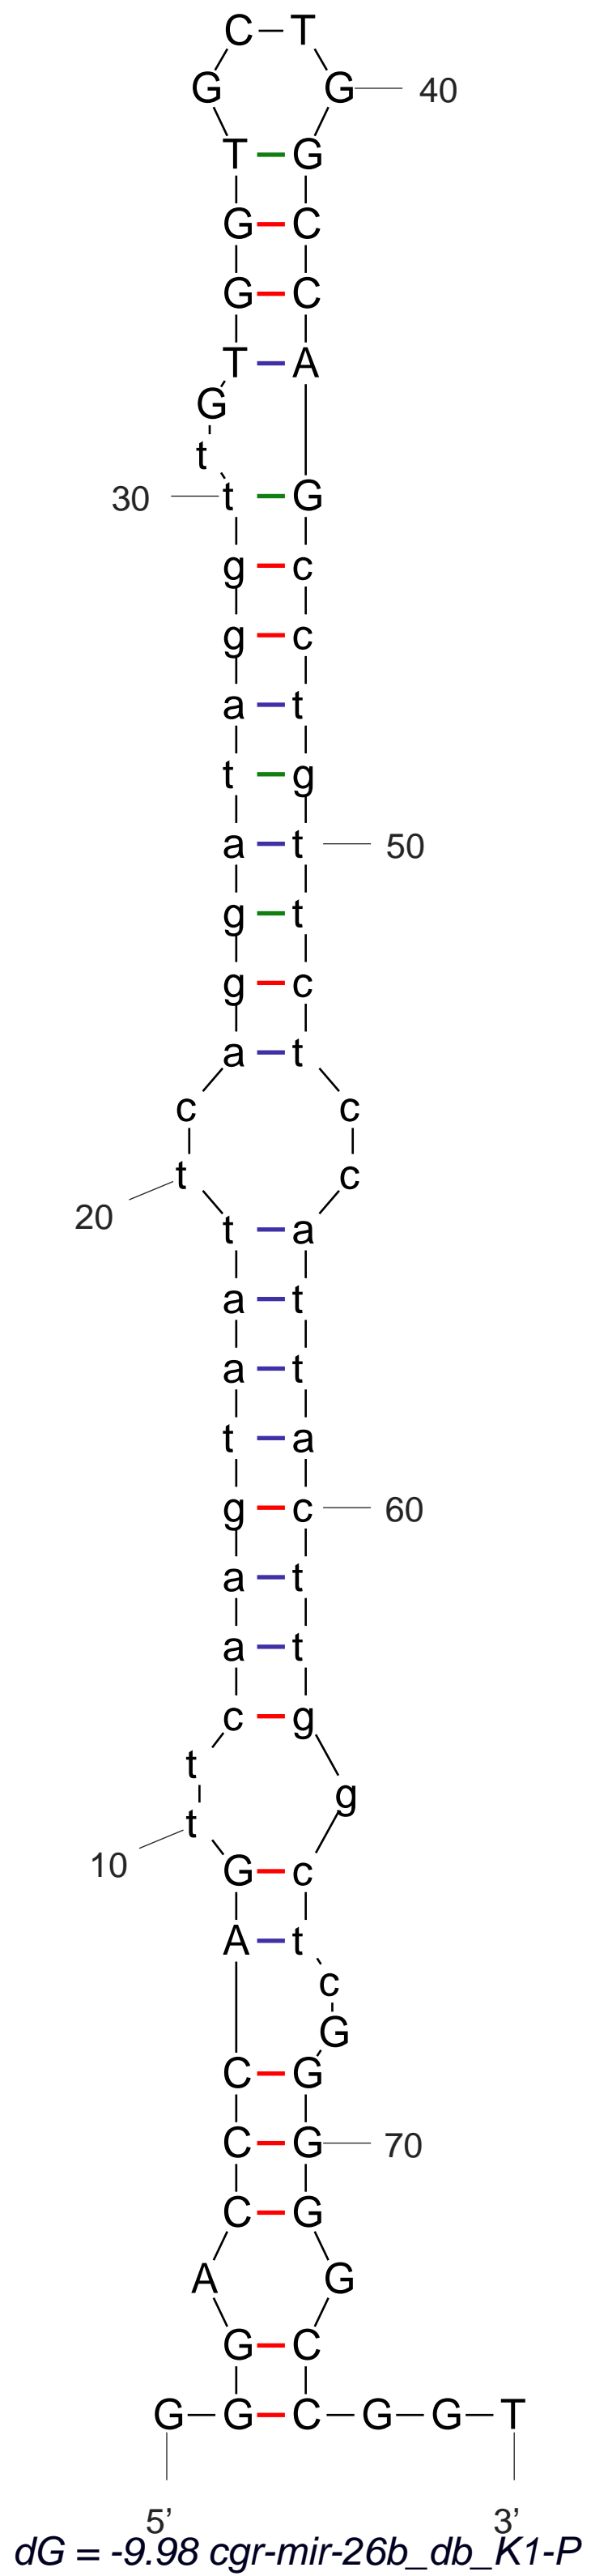

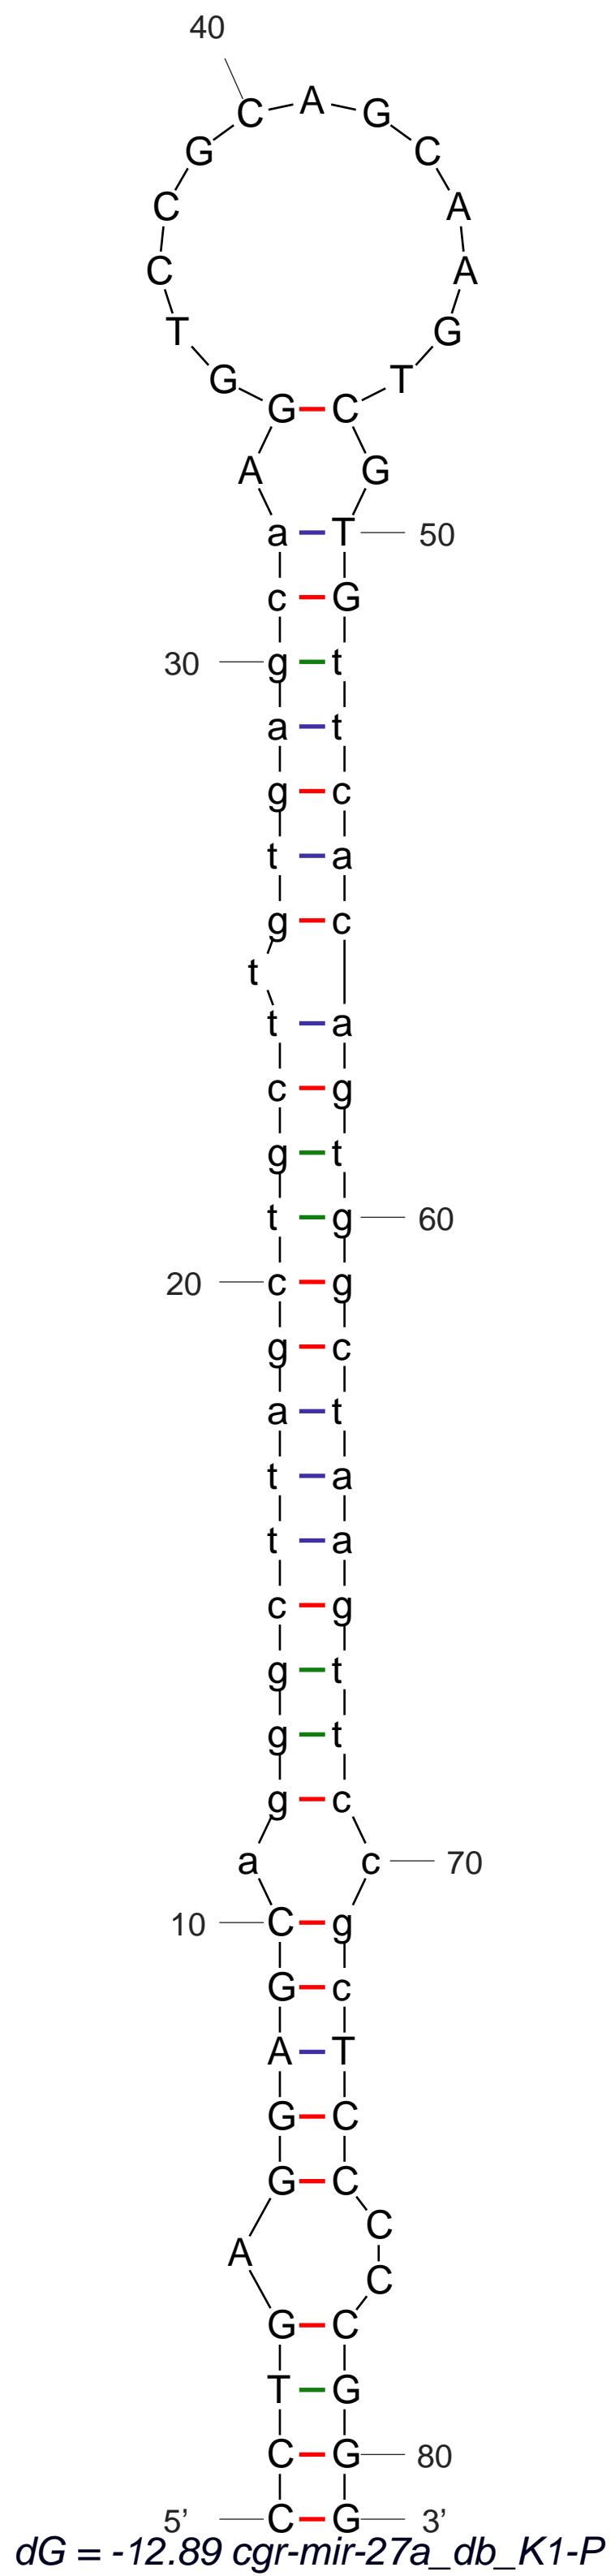

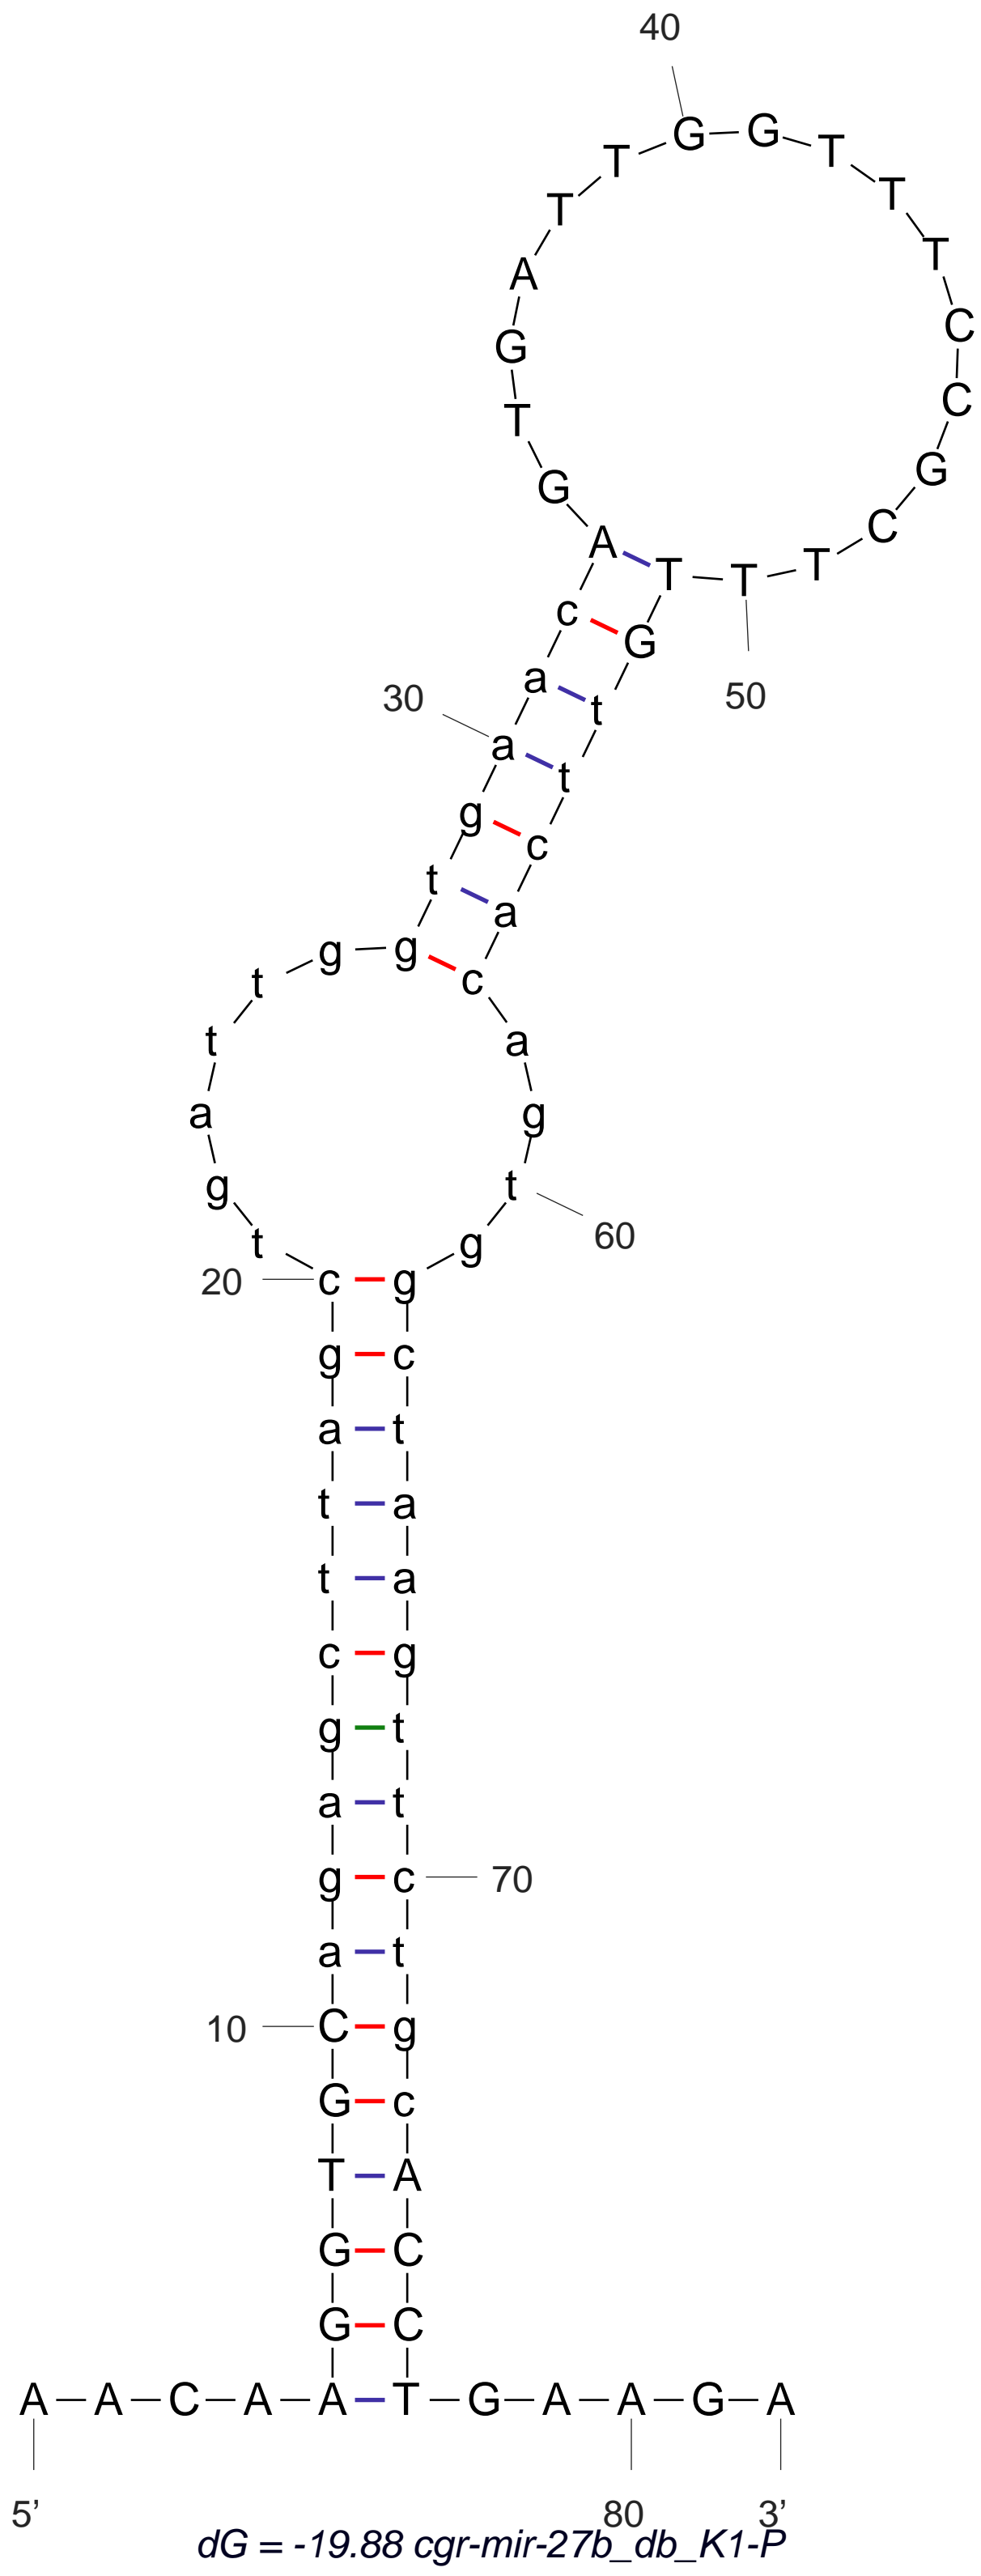

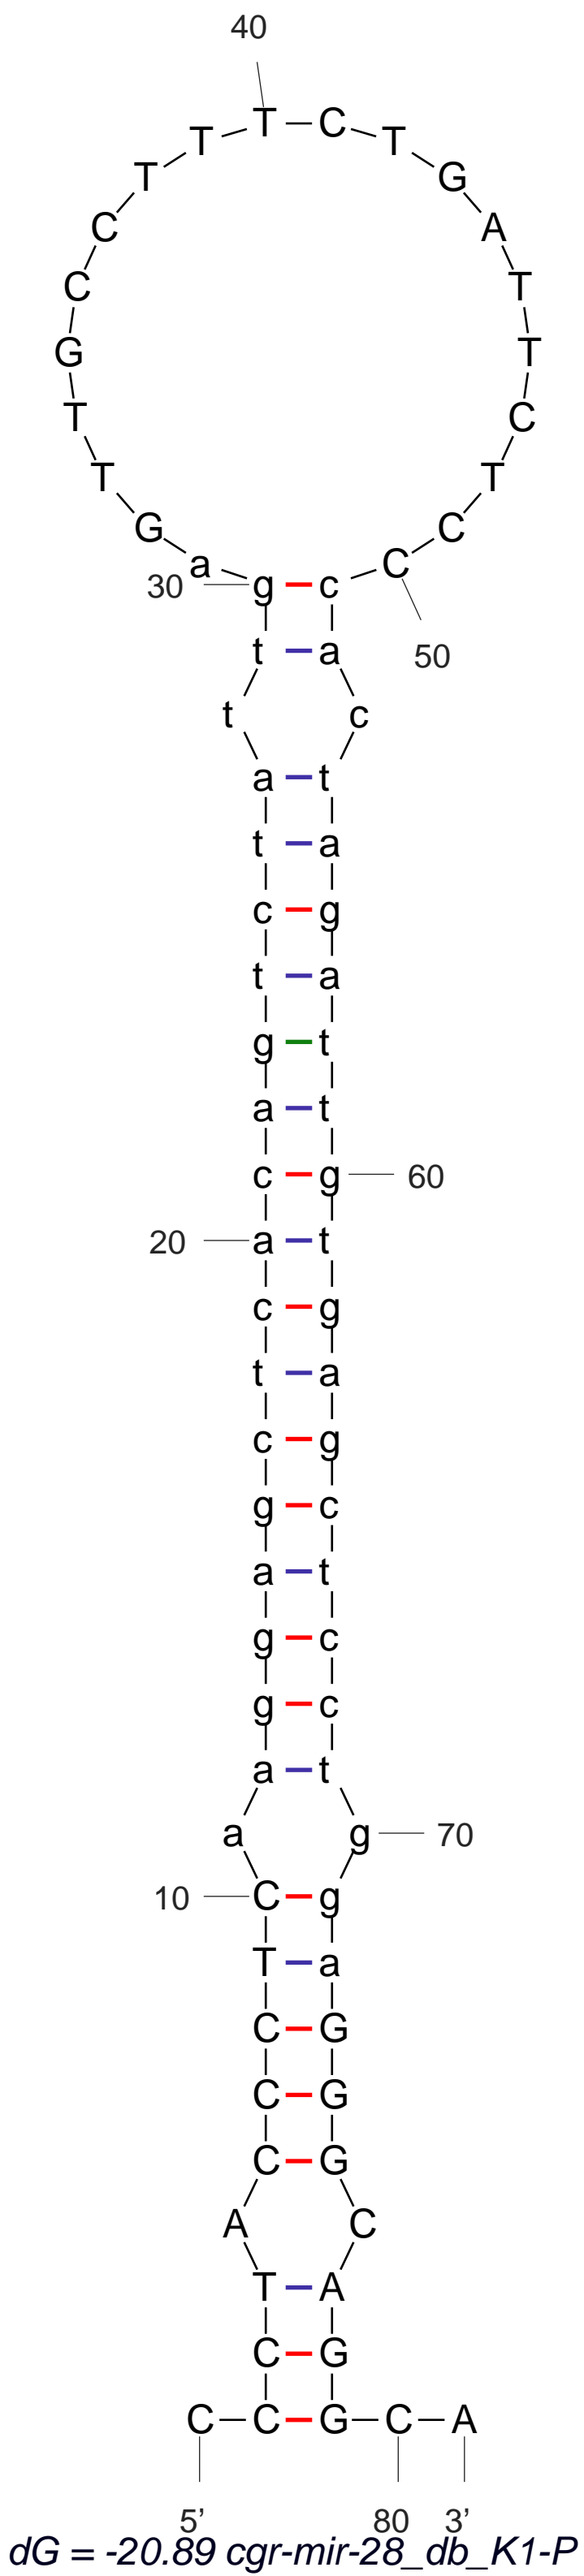

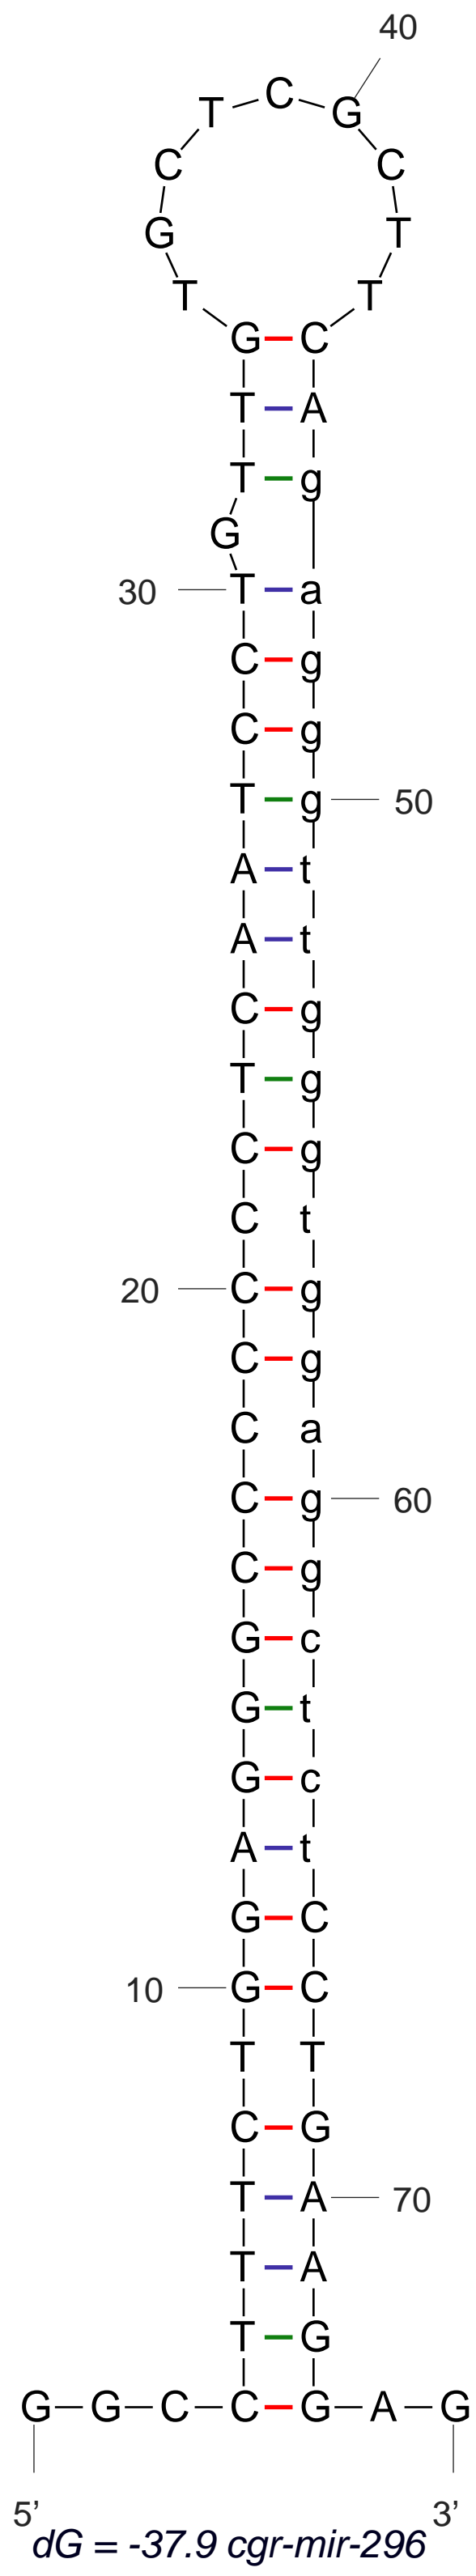

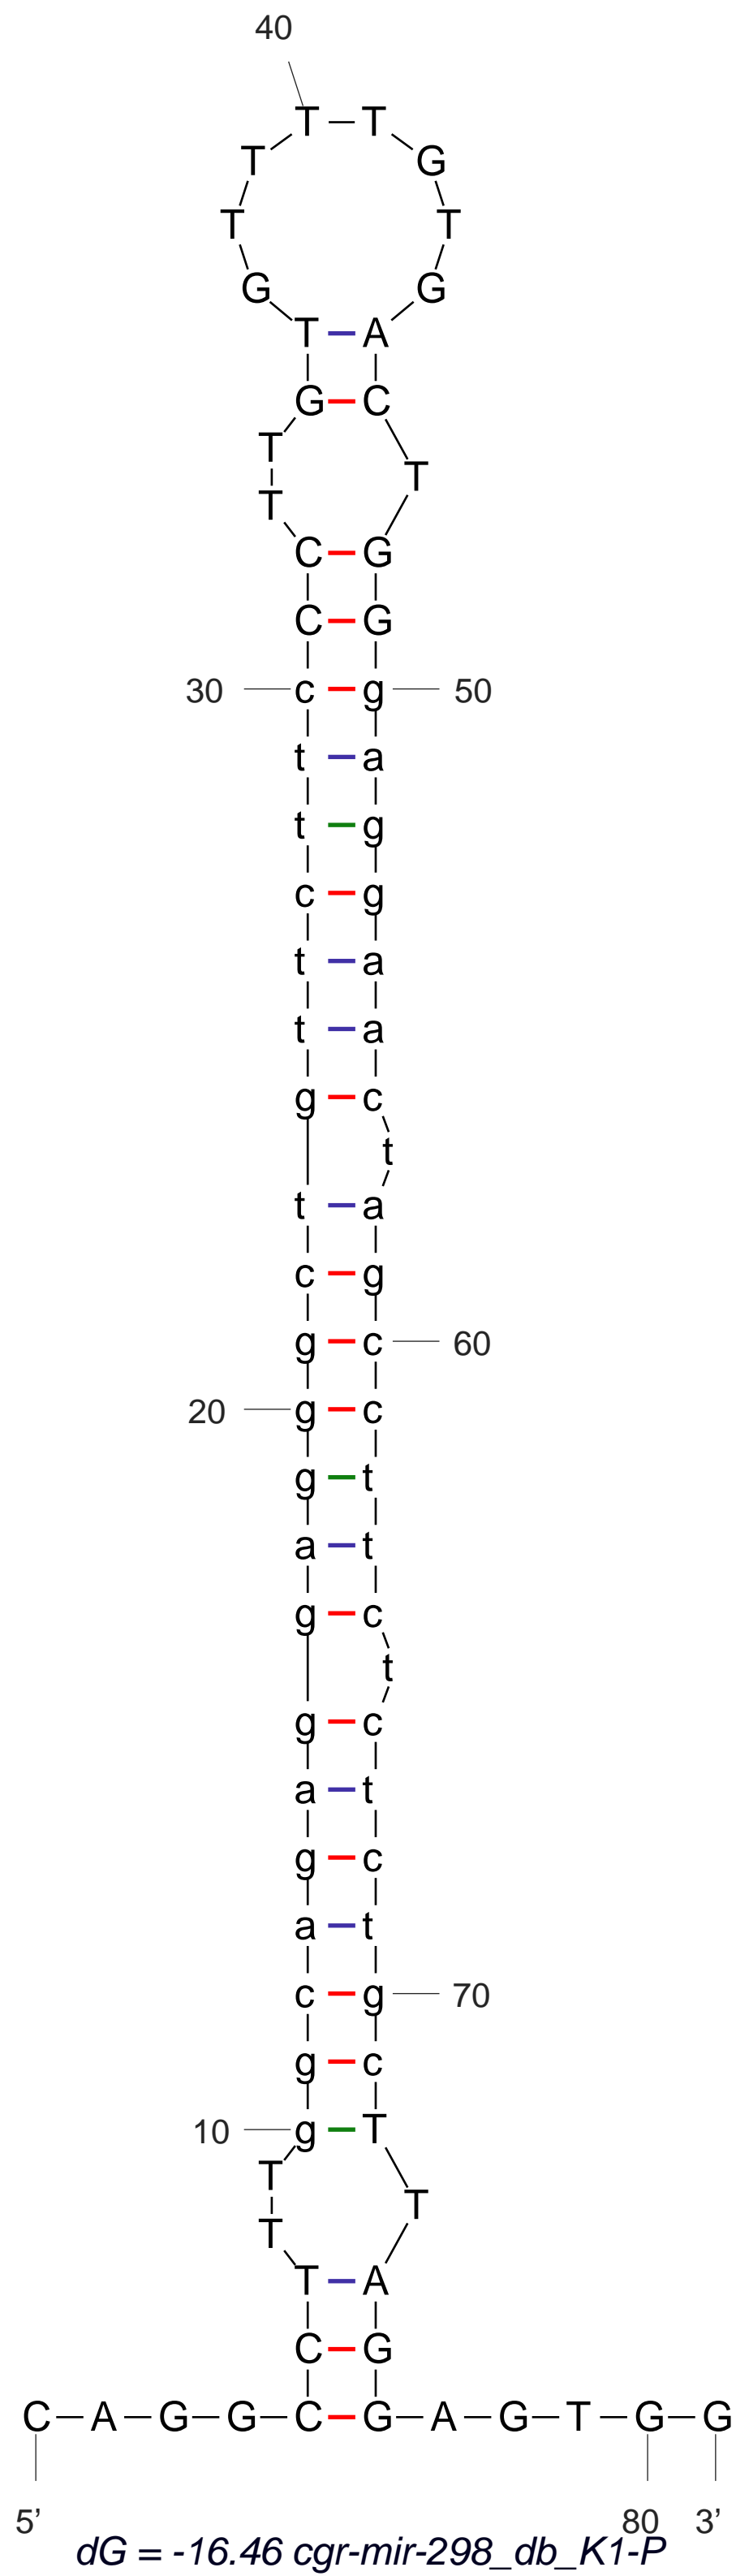



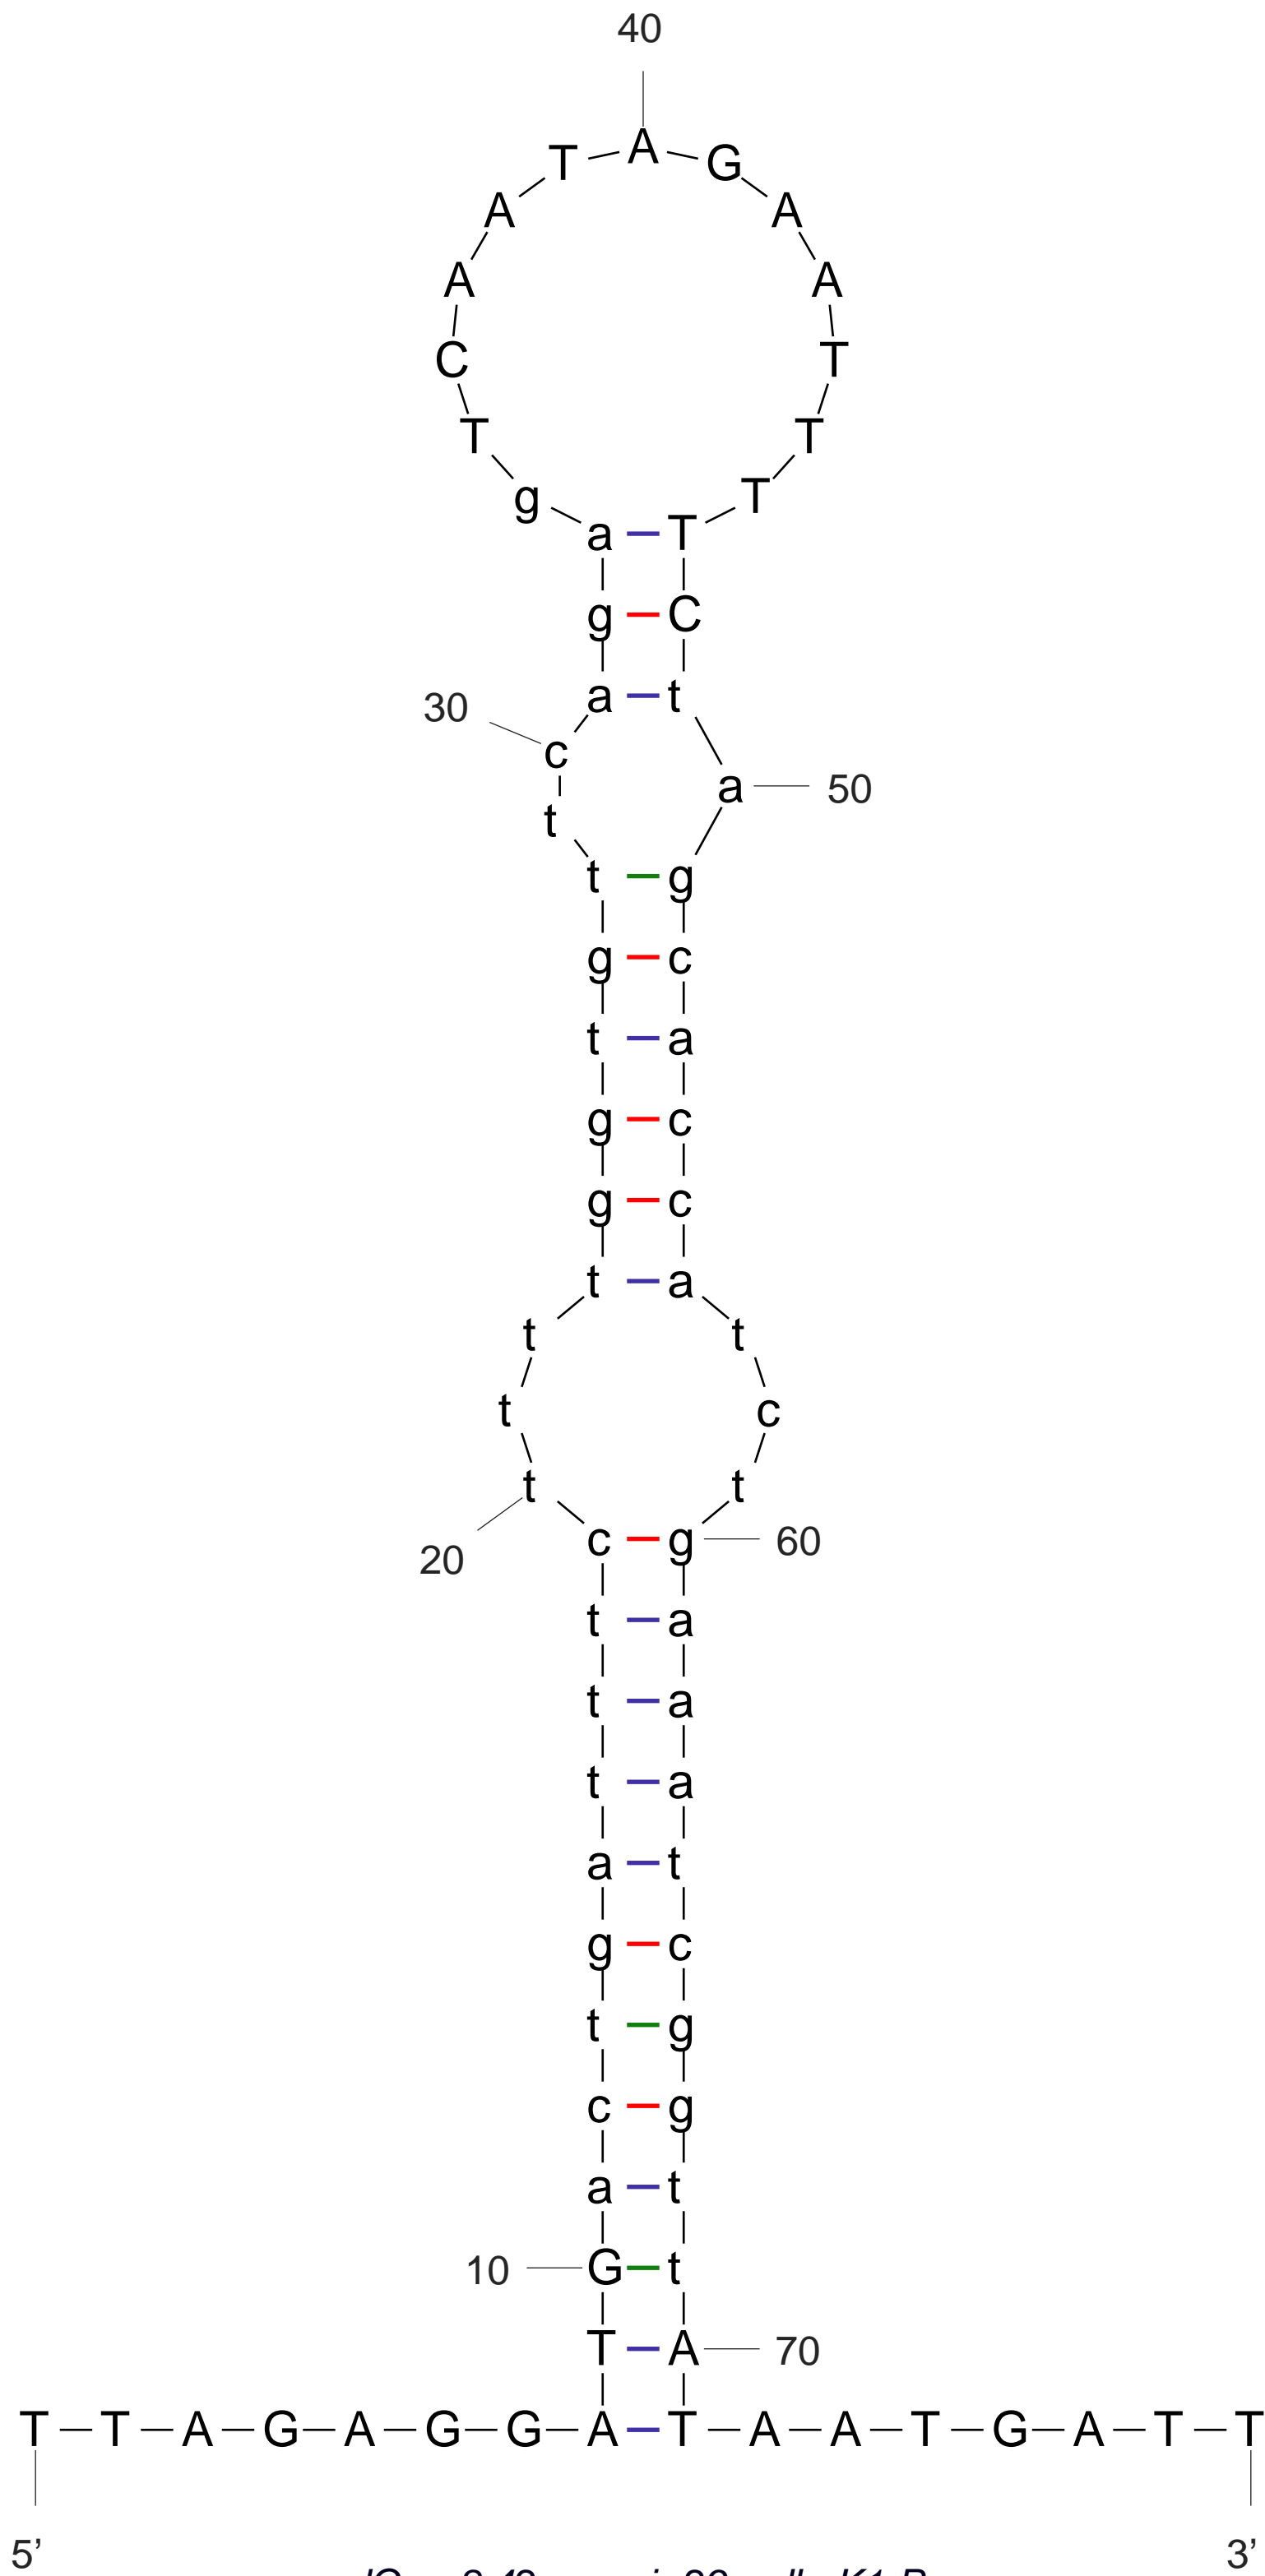

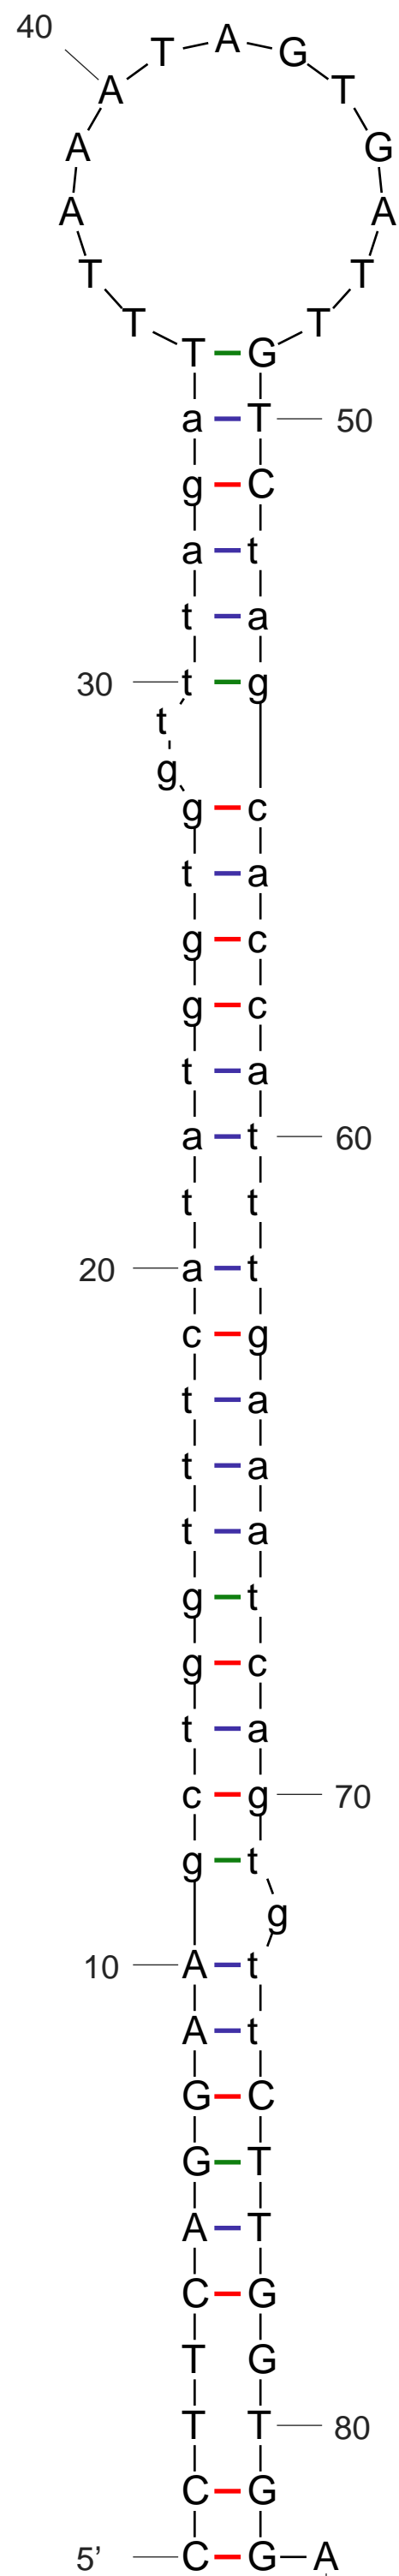

$dG = -32.9$  *cgr-mir-29b*

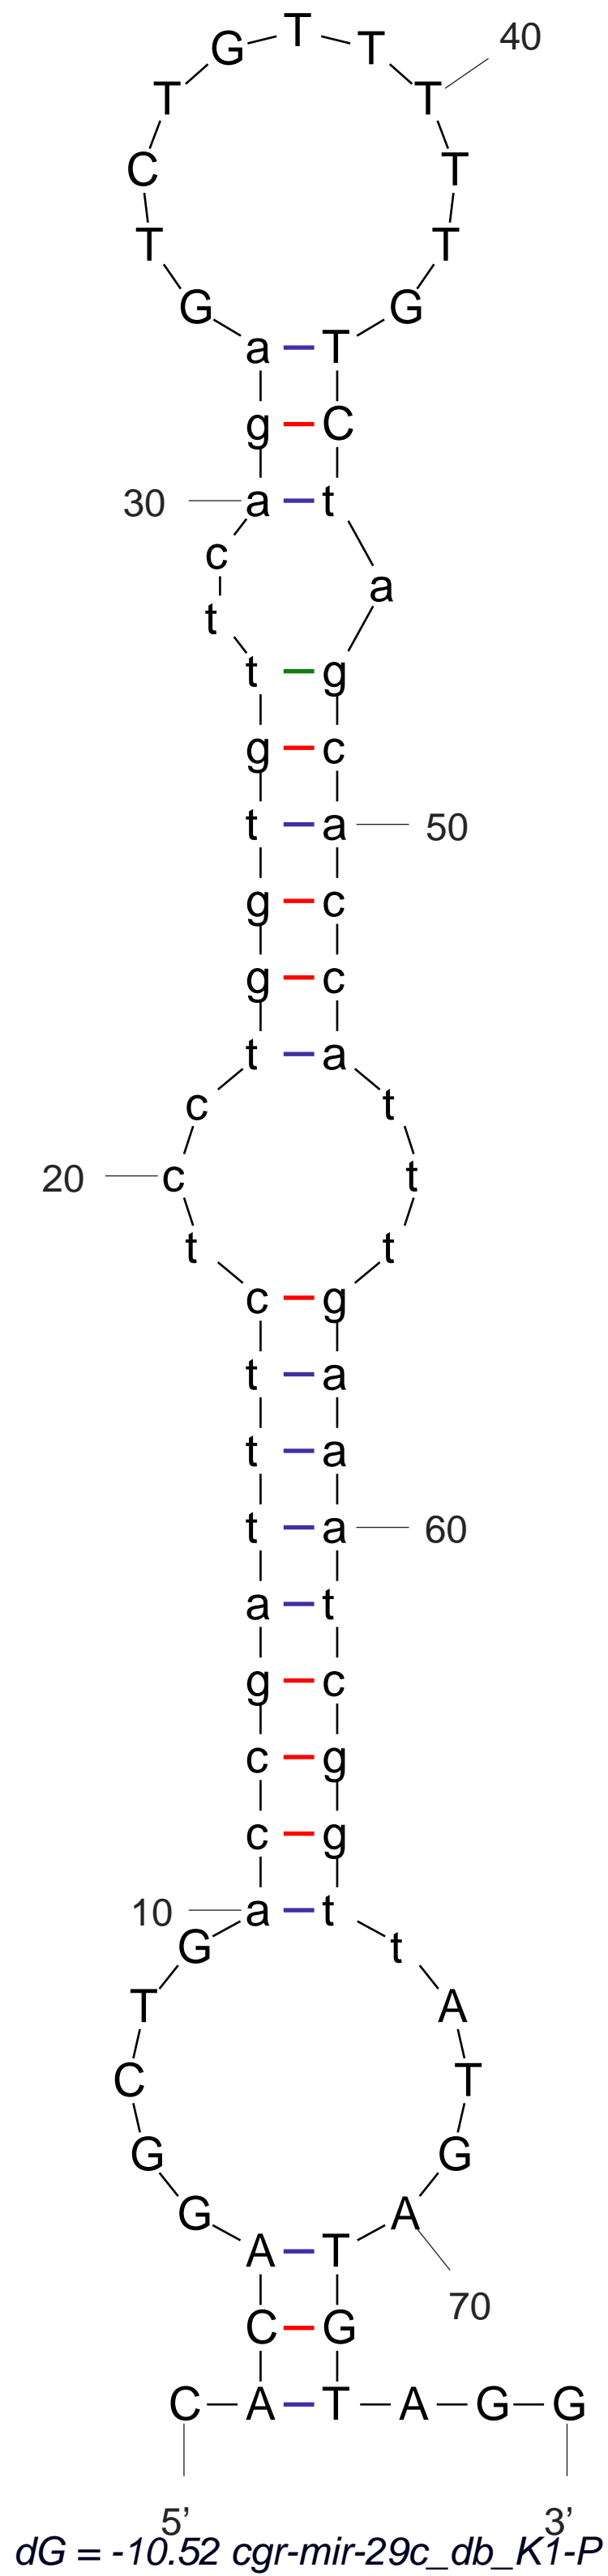

$dG = -10.52$  *cgr-mir-29c\_db\_K1-P*

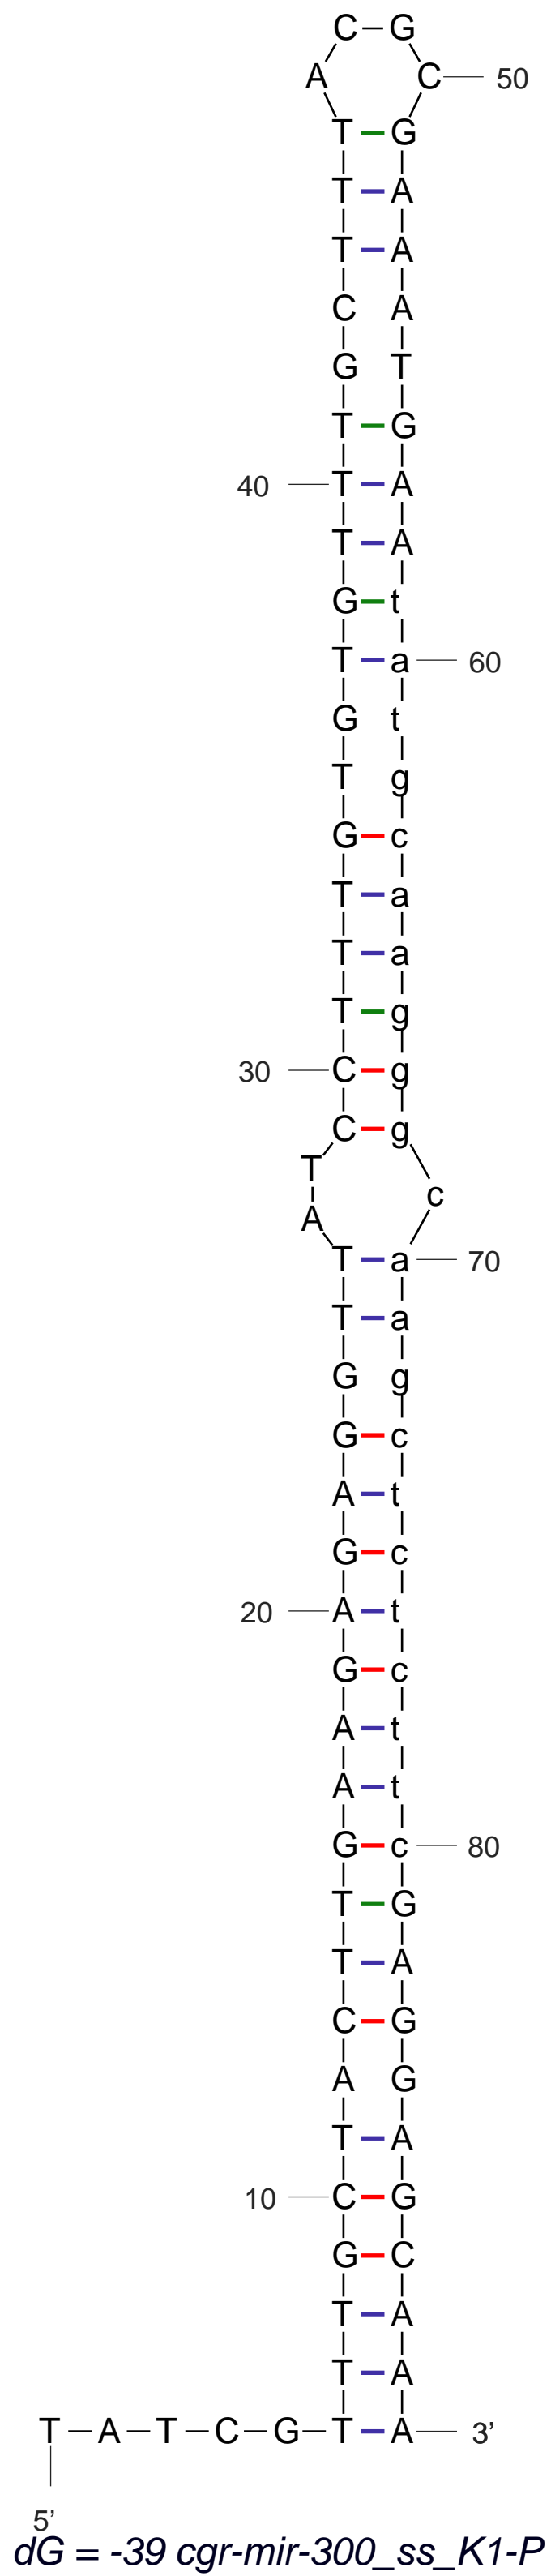

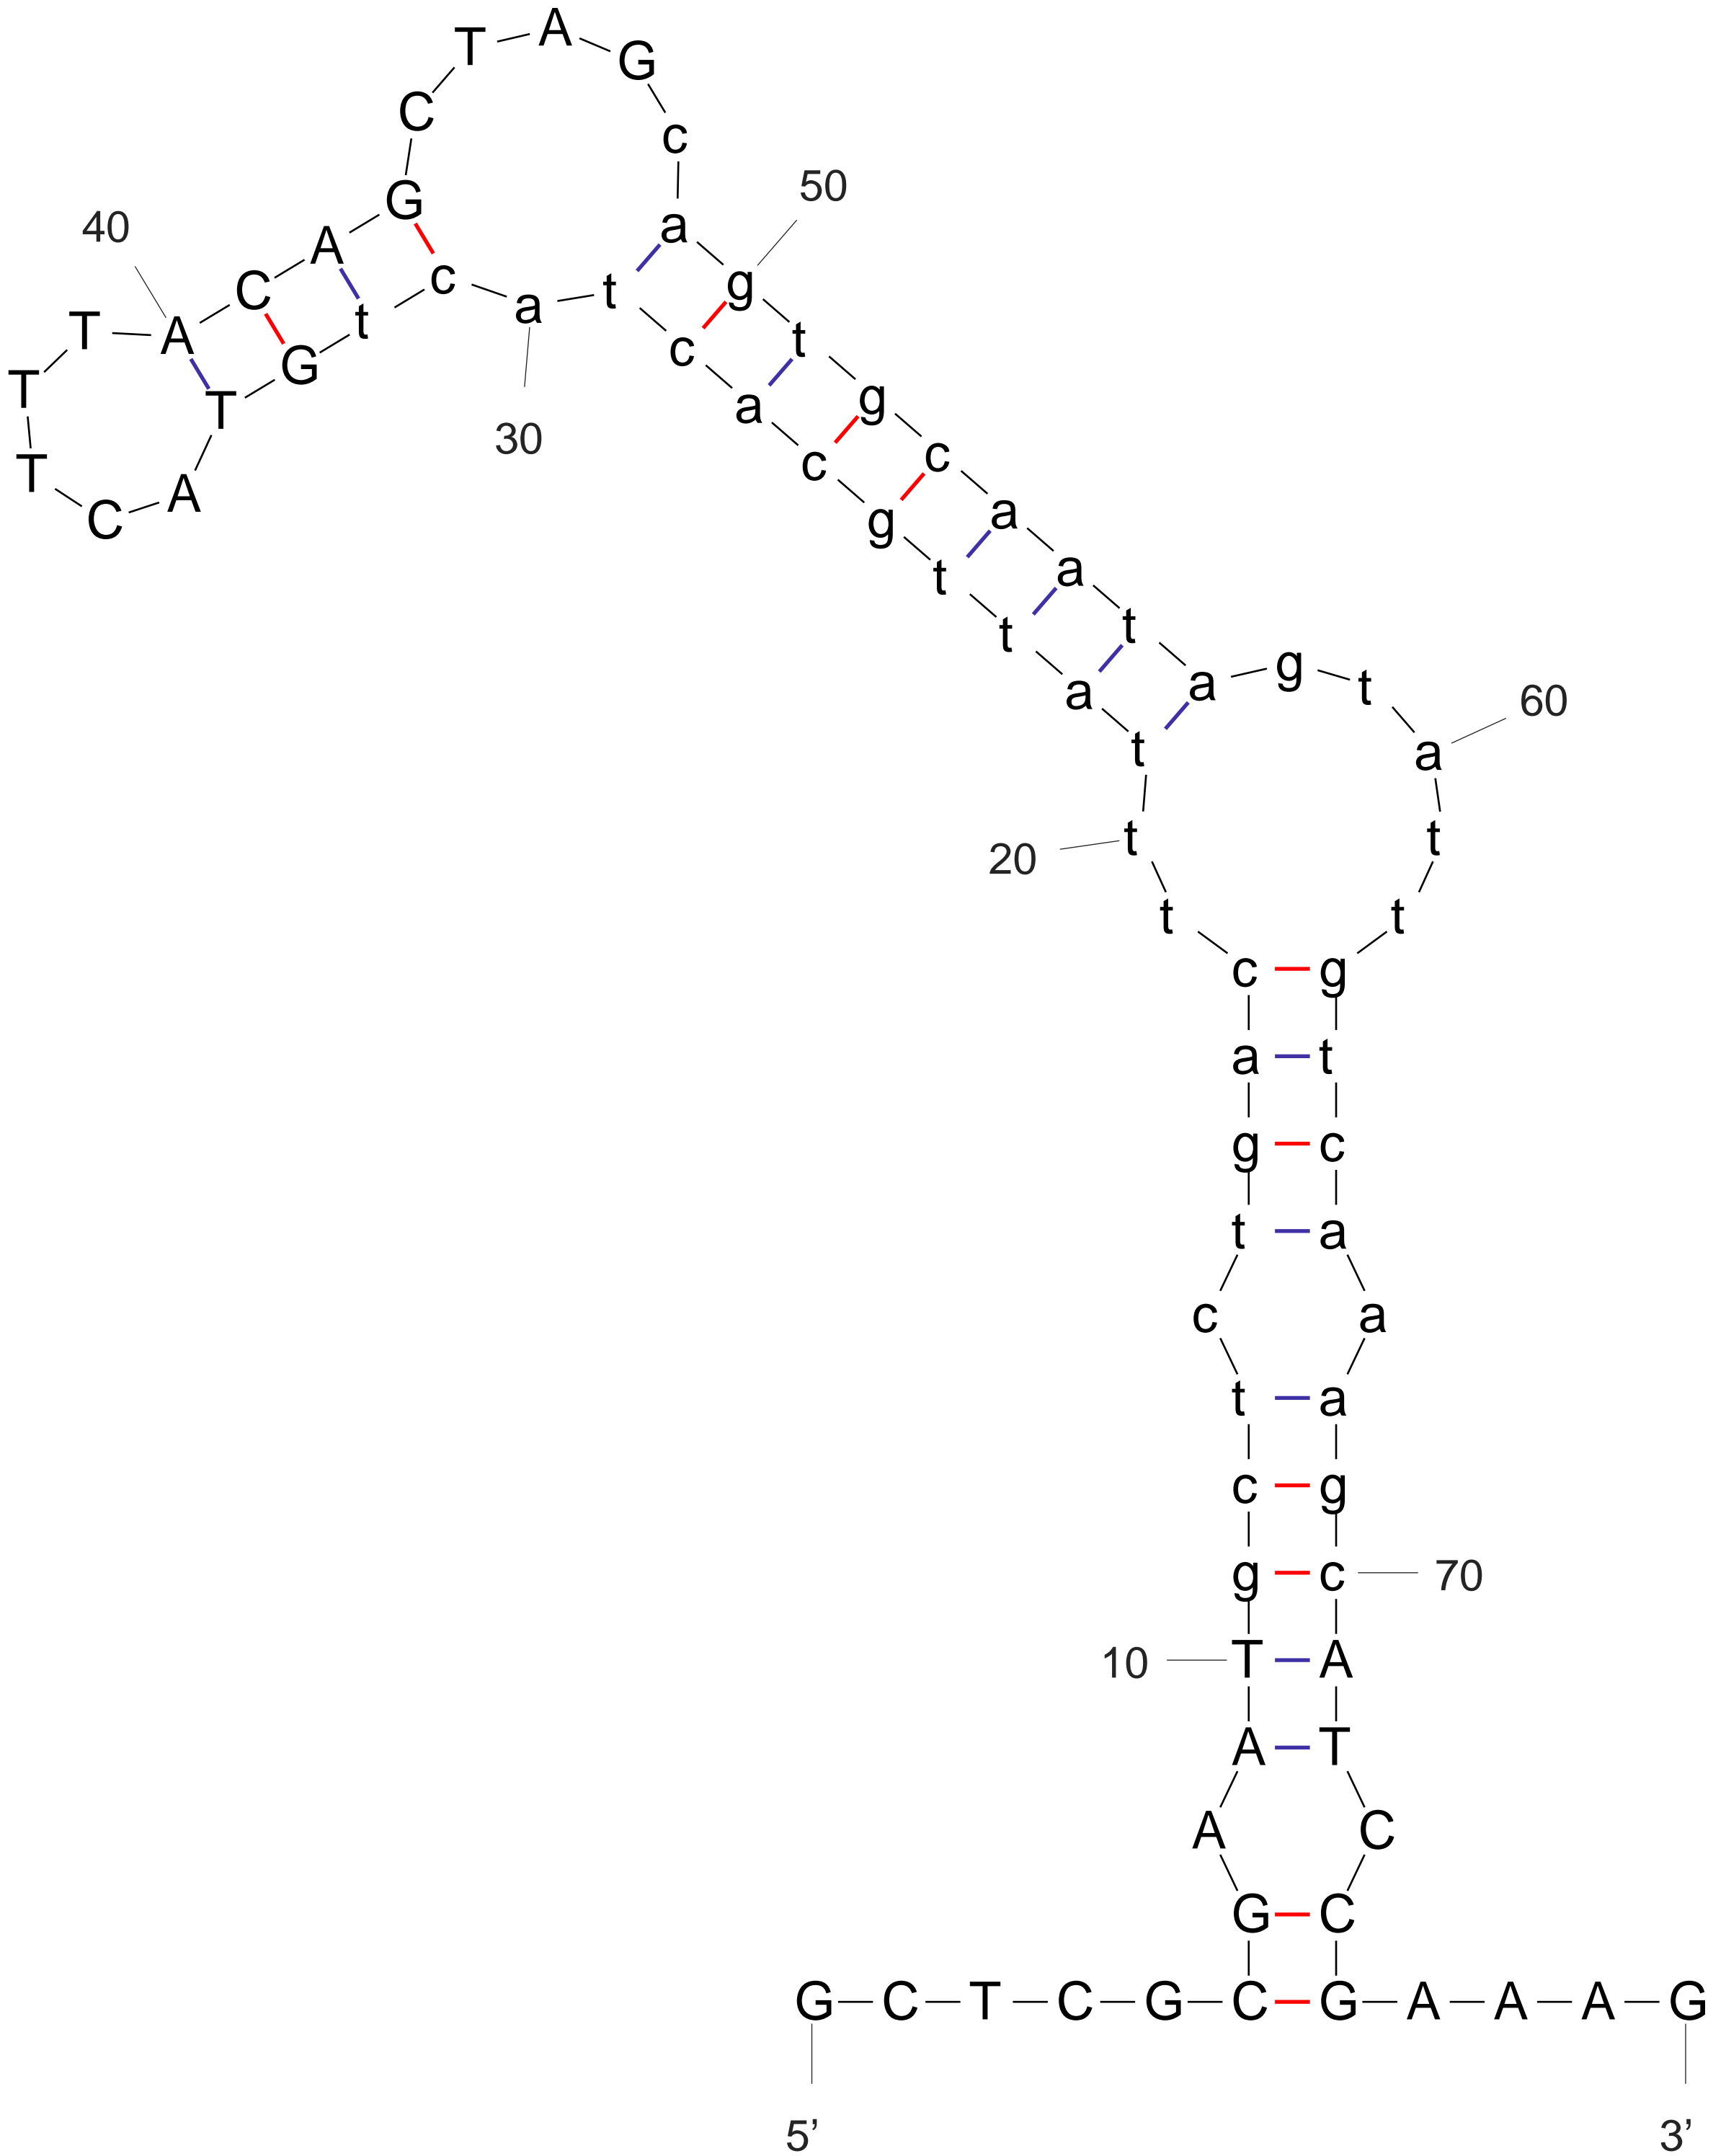

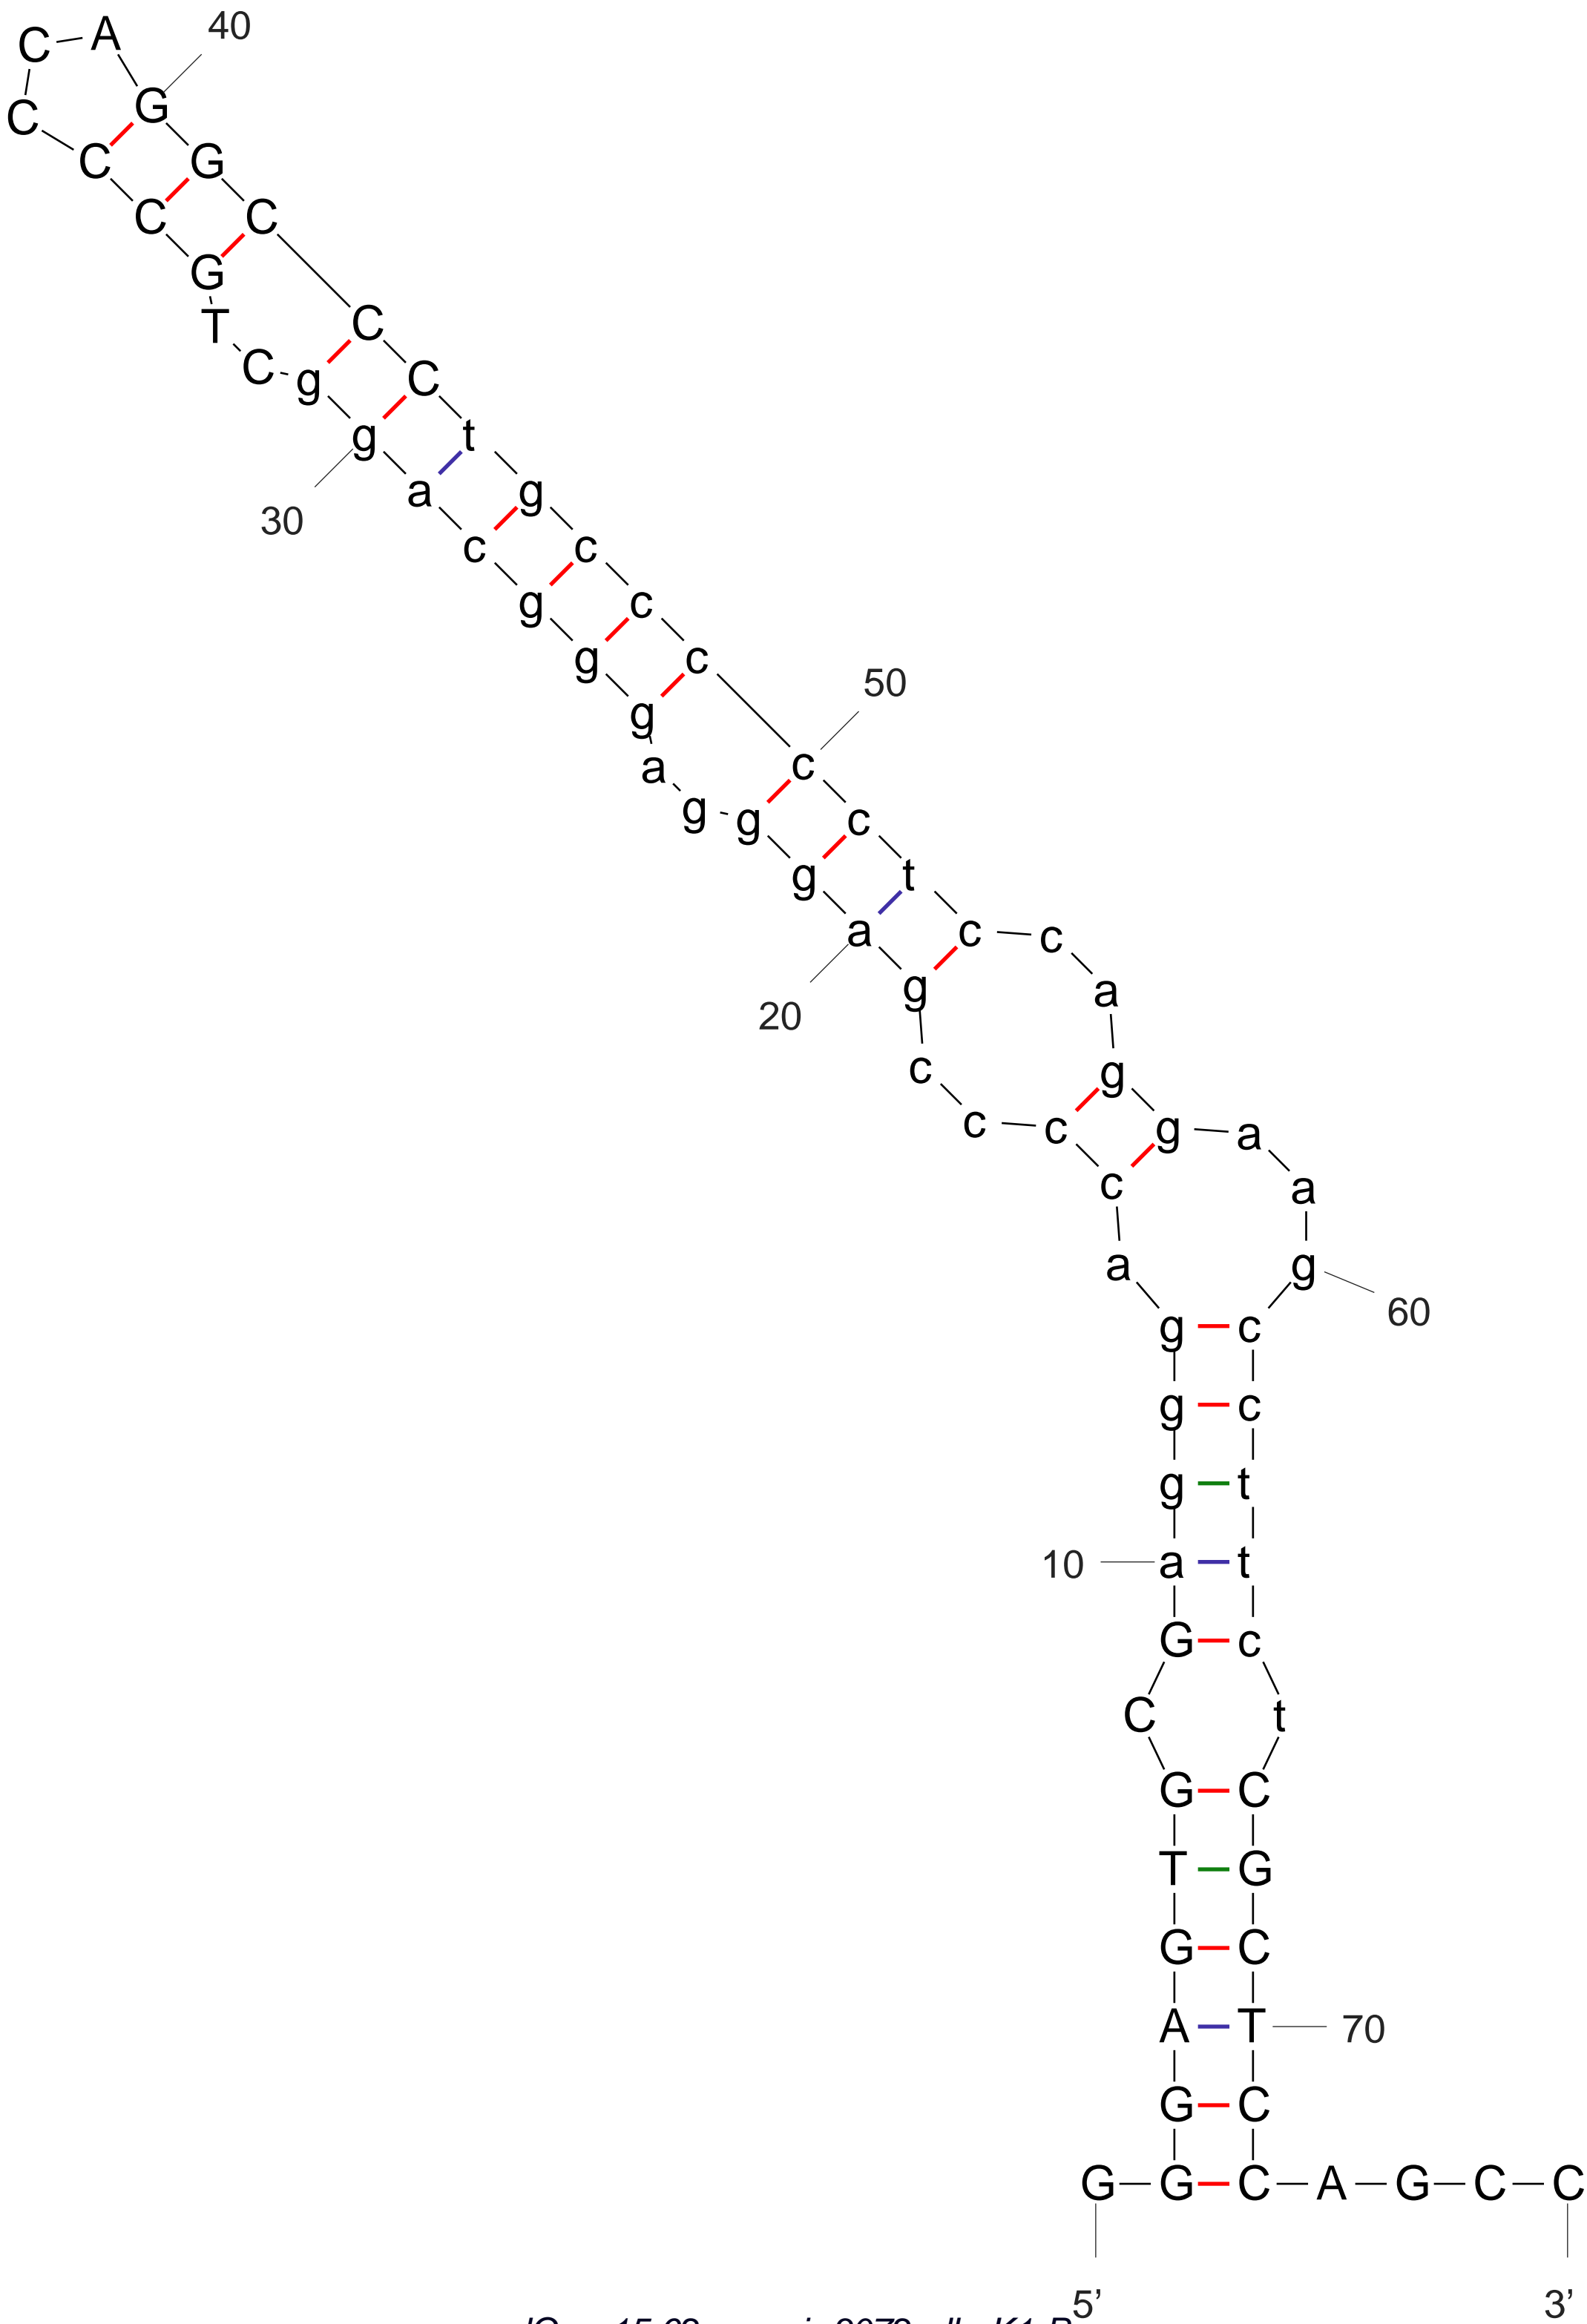

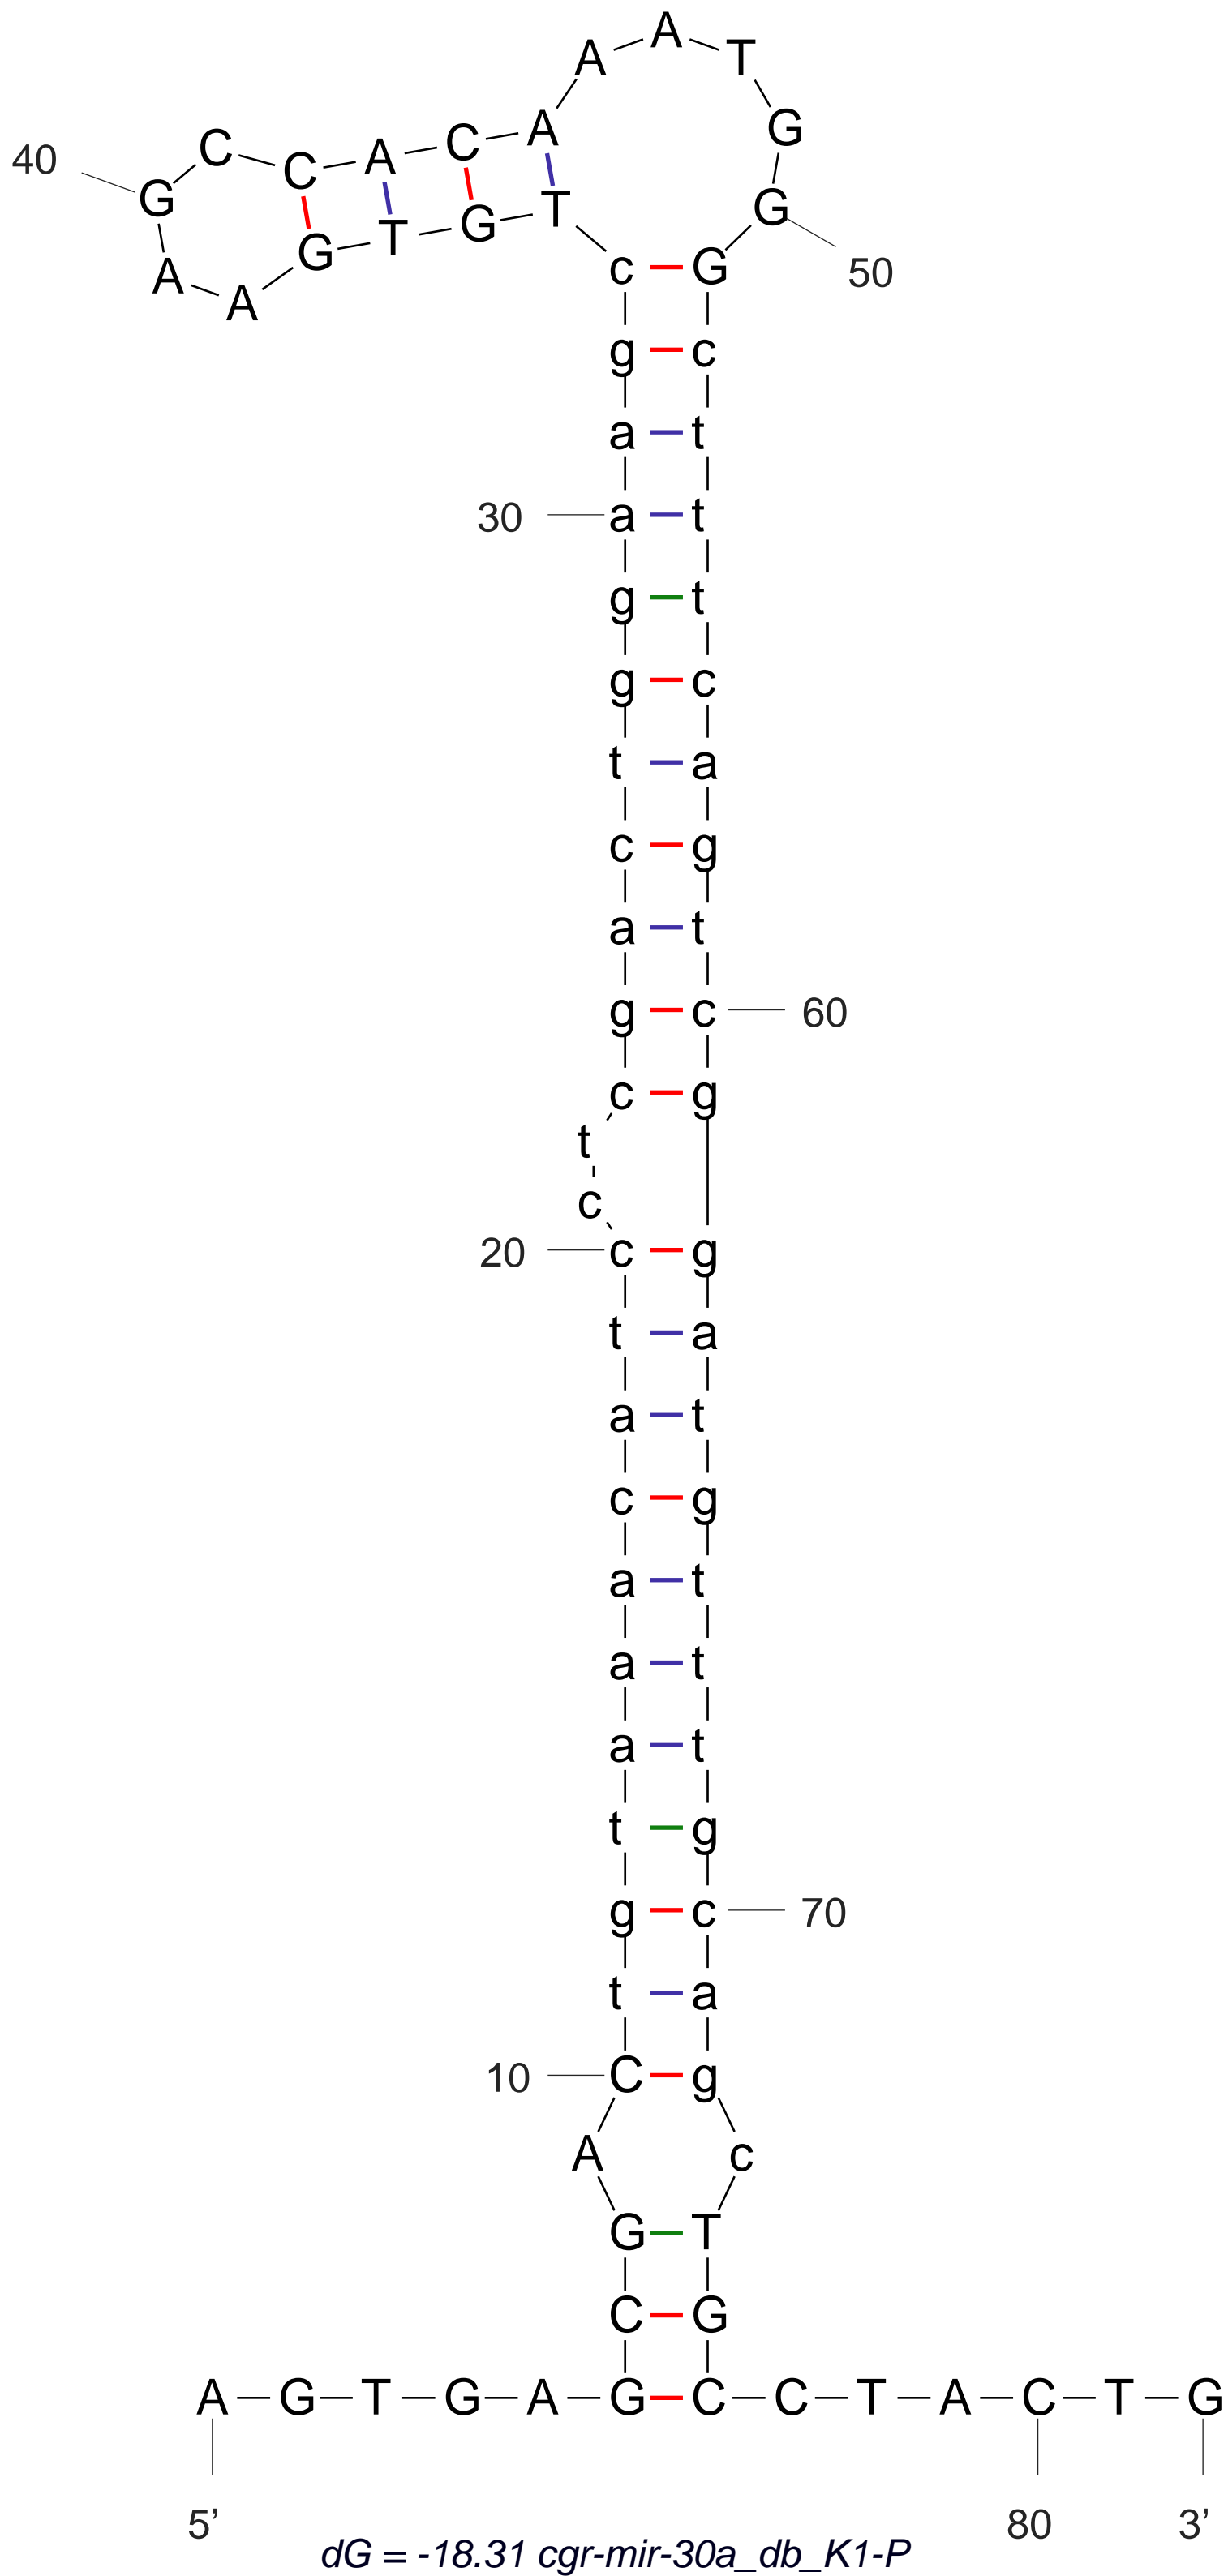

$dG = -18.31$  *cgr-mir-30a\_db\_K1-P*

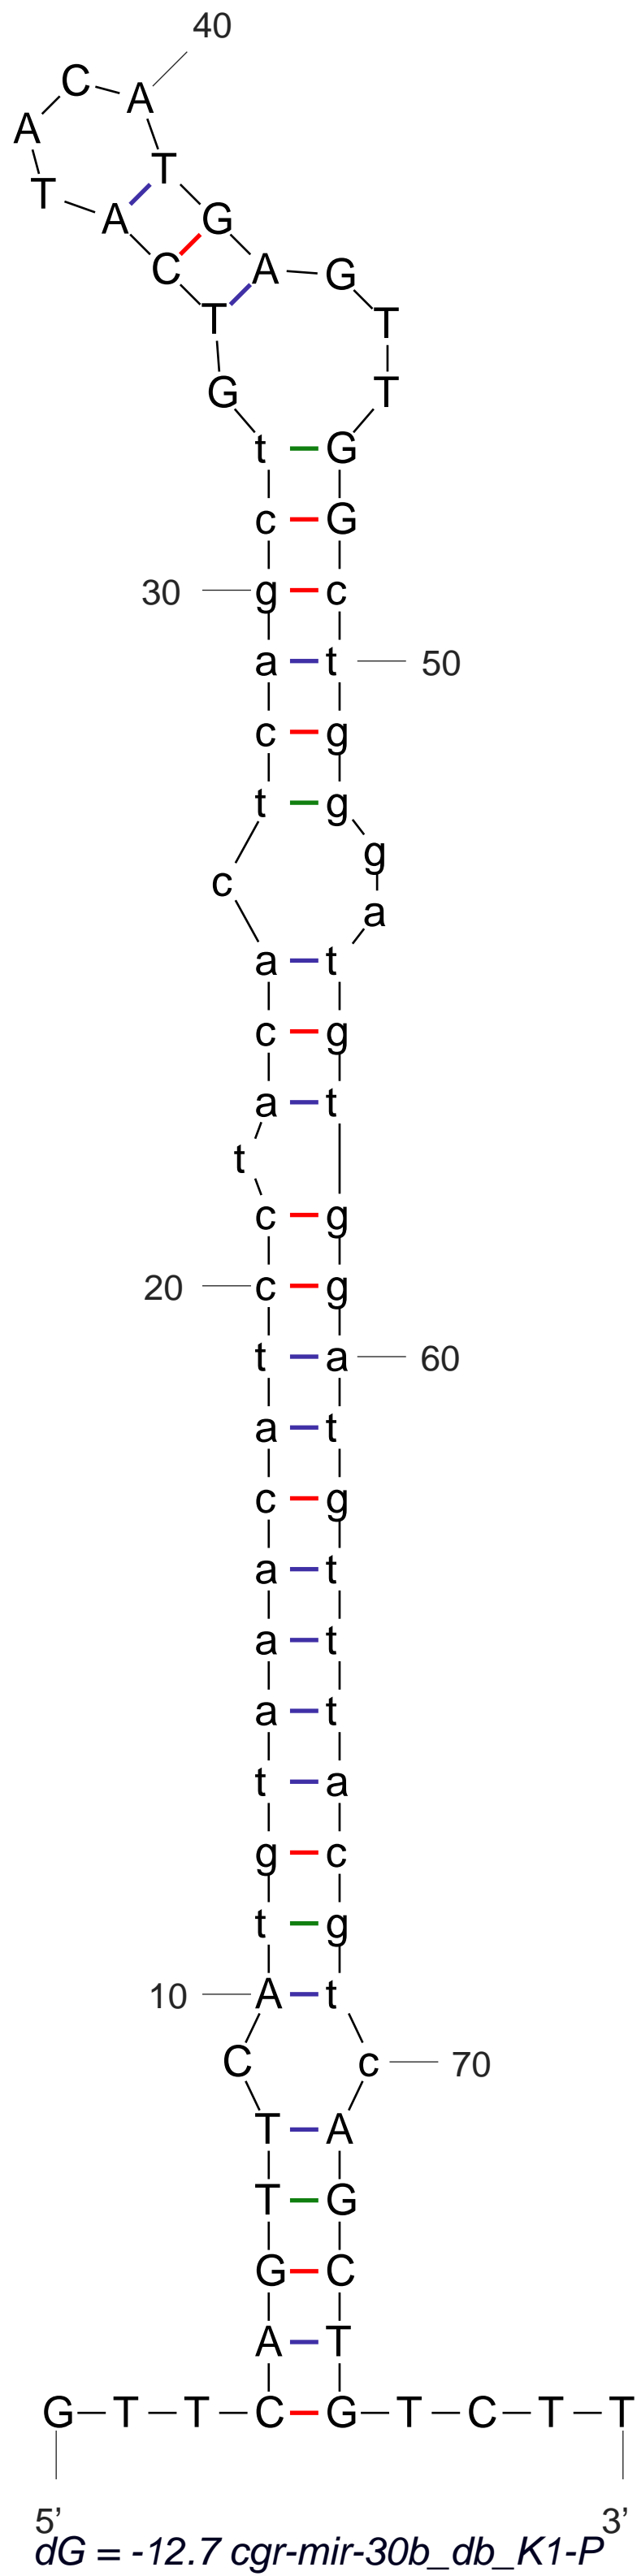



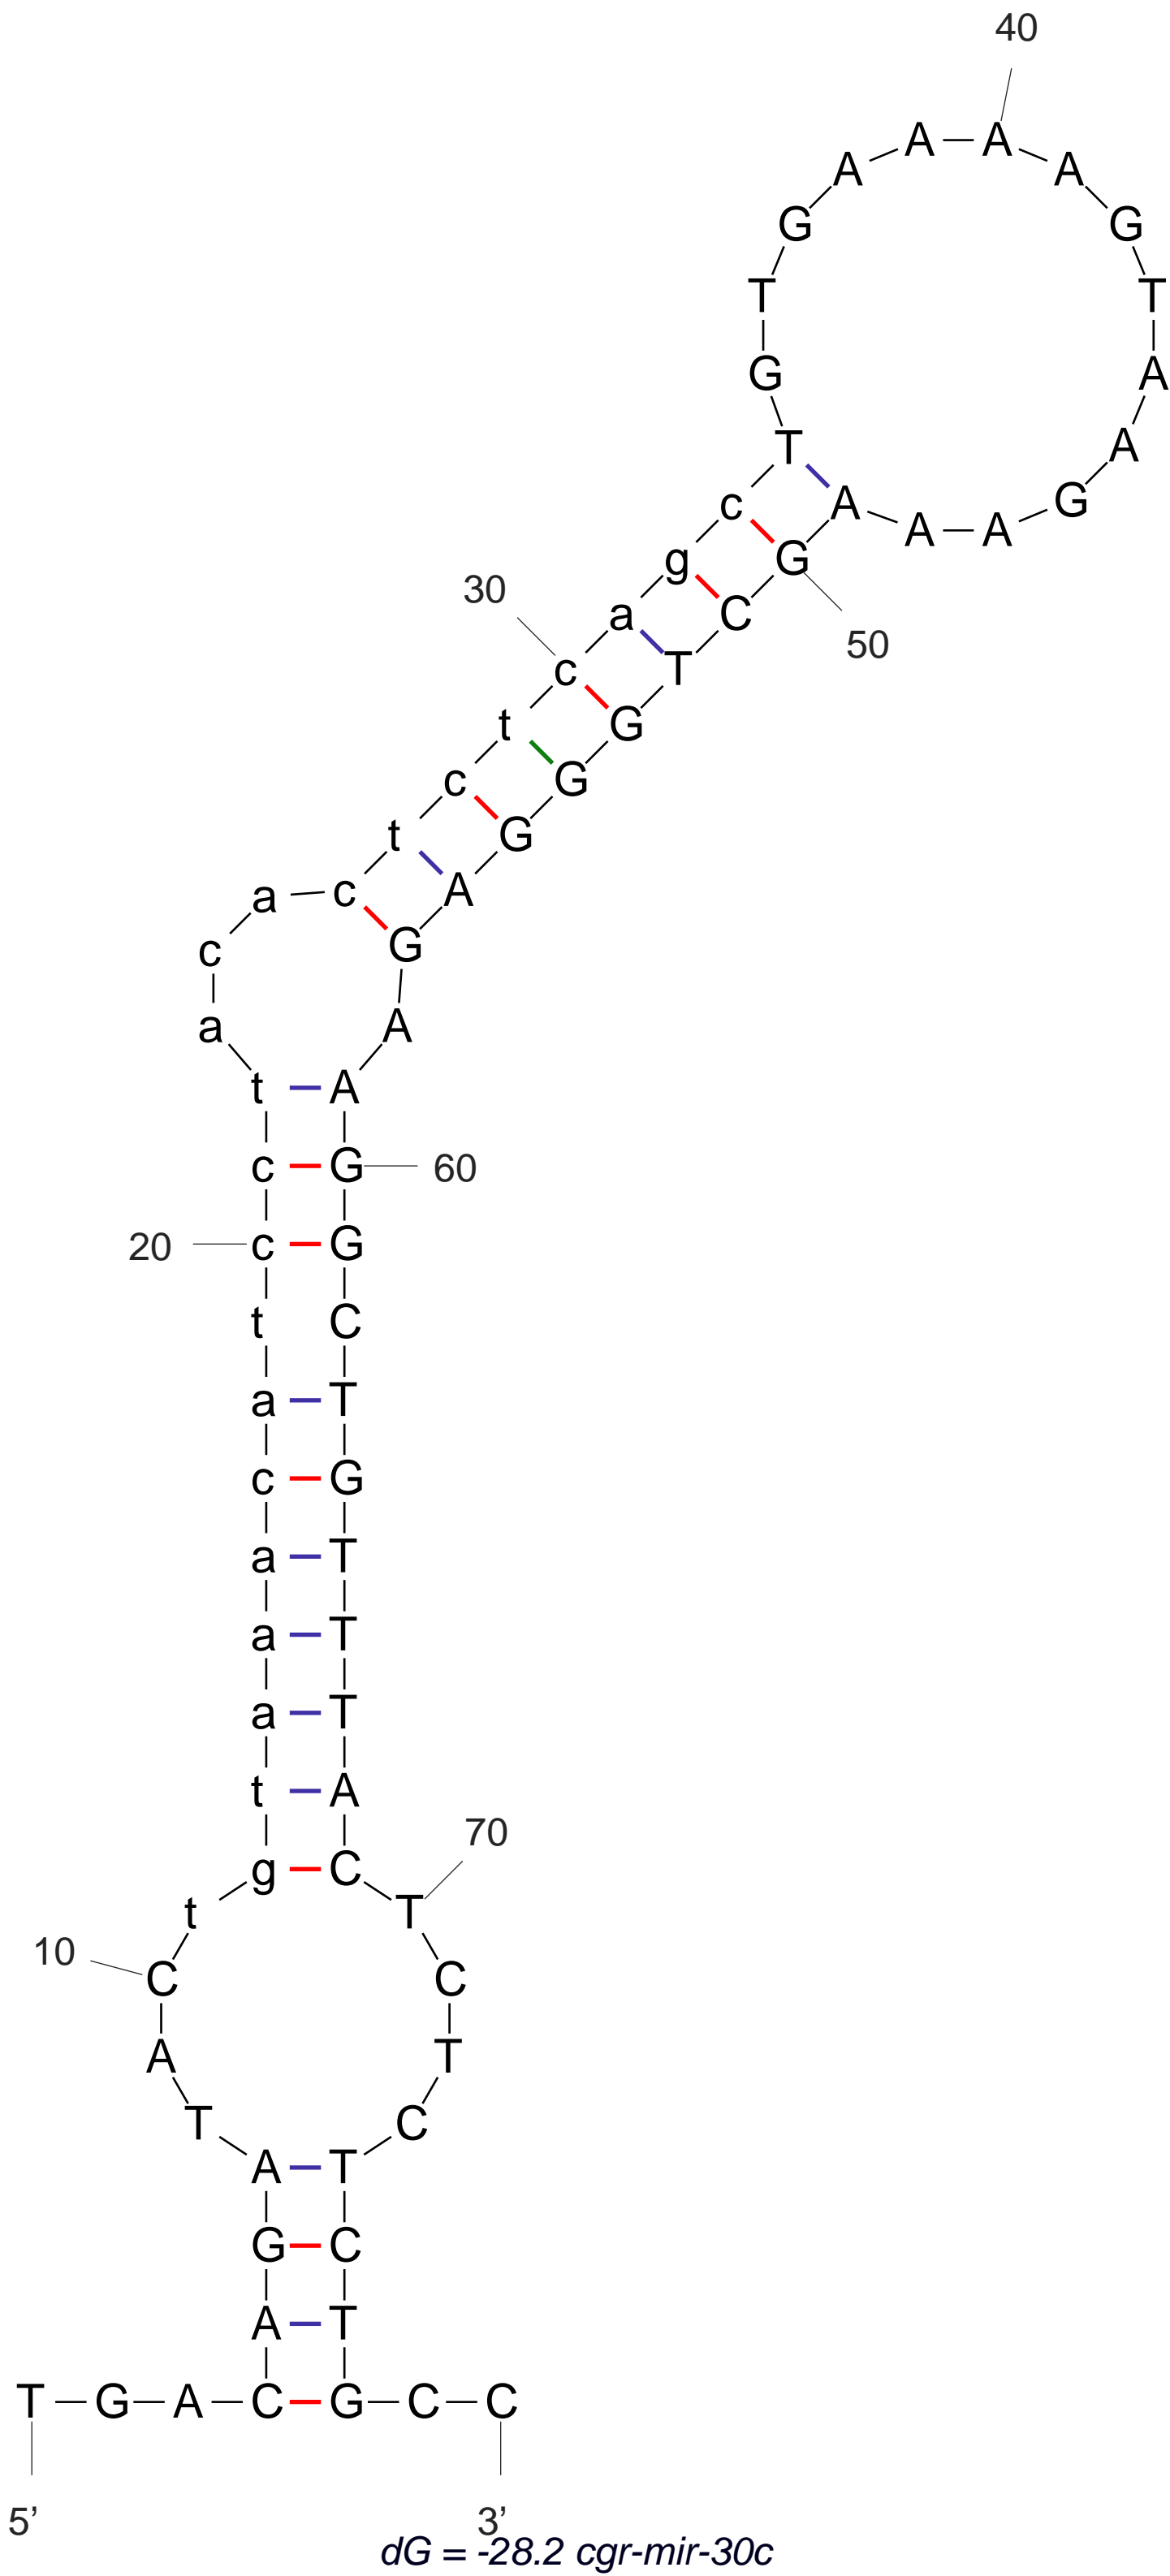

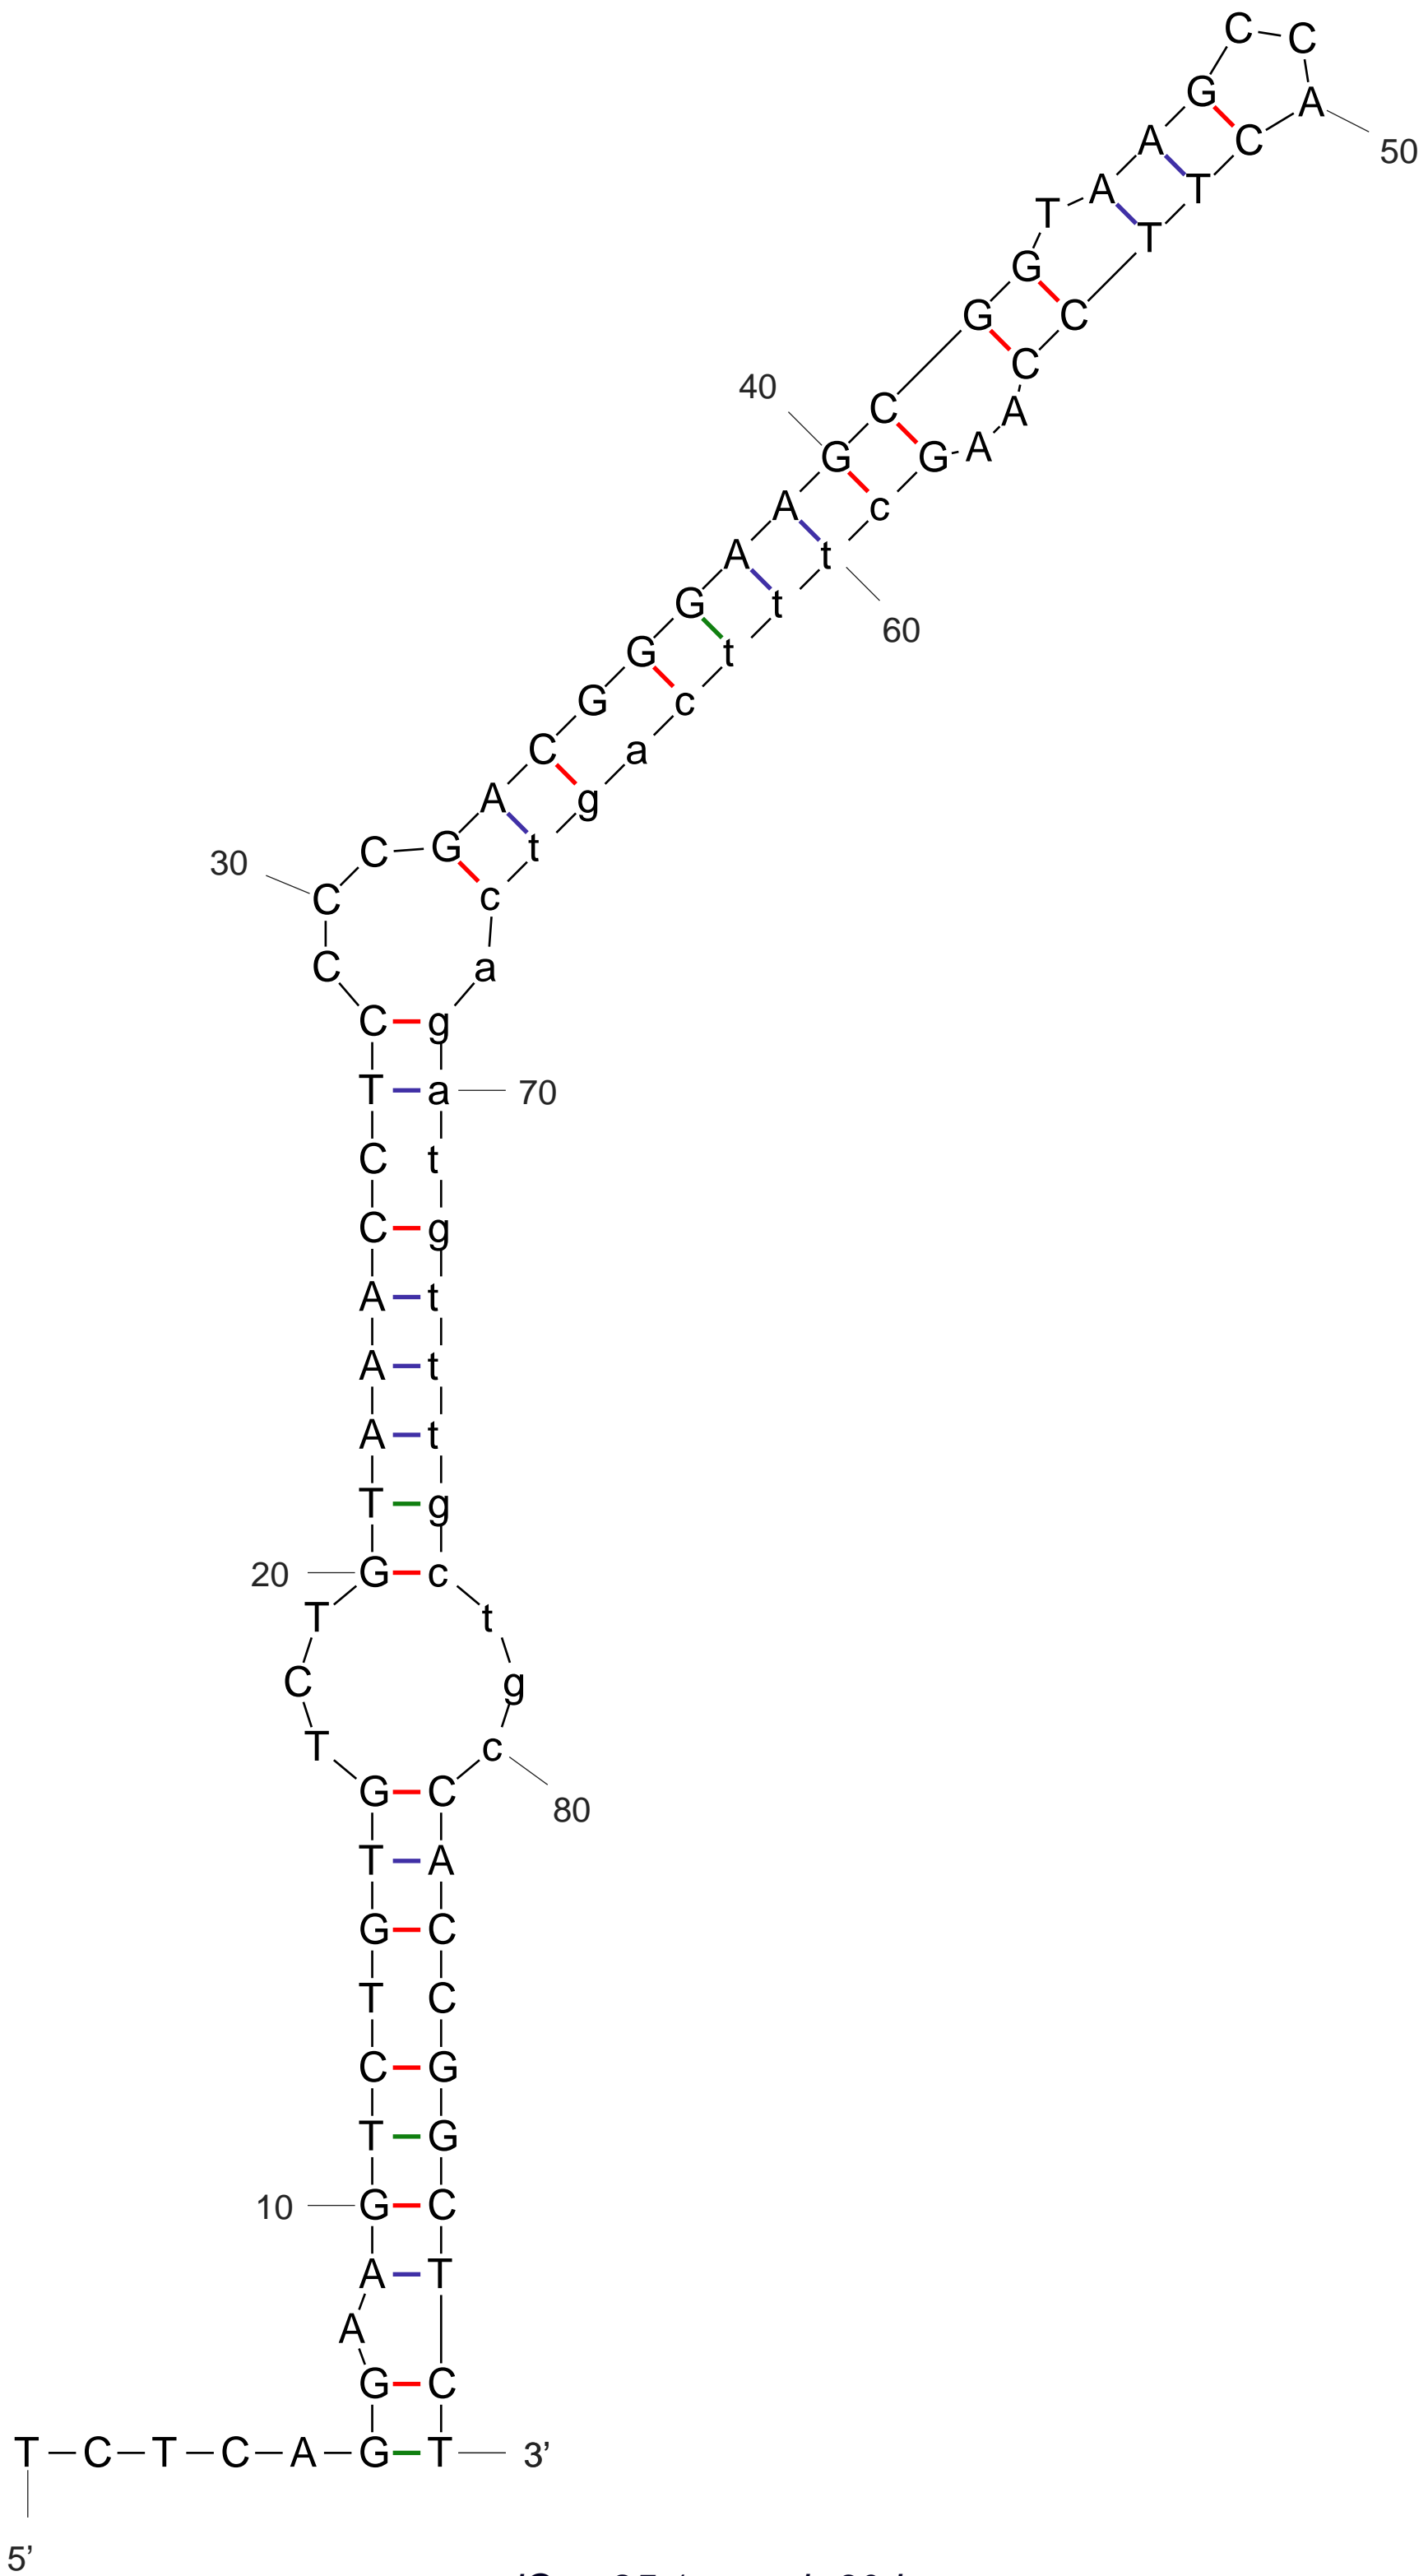

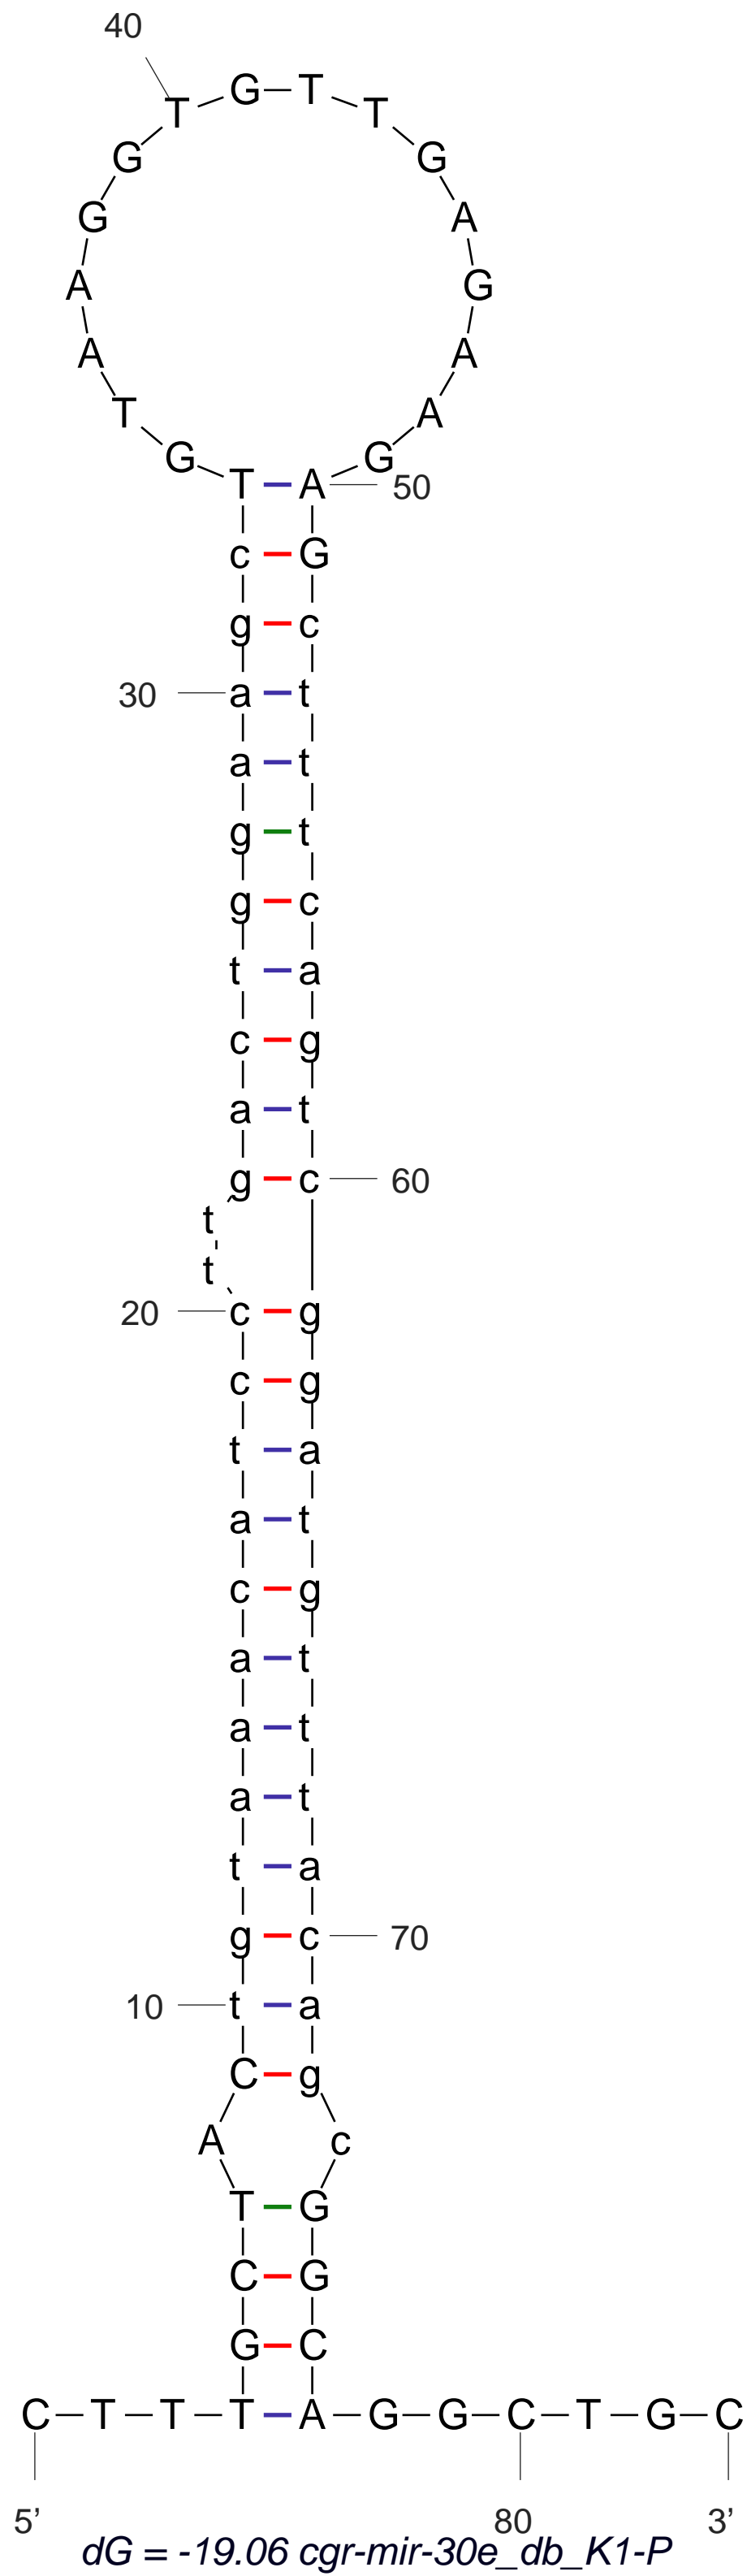

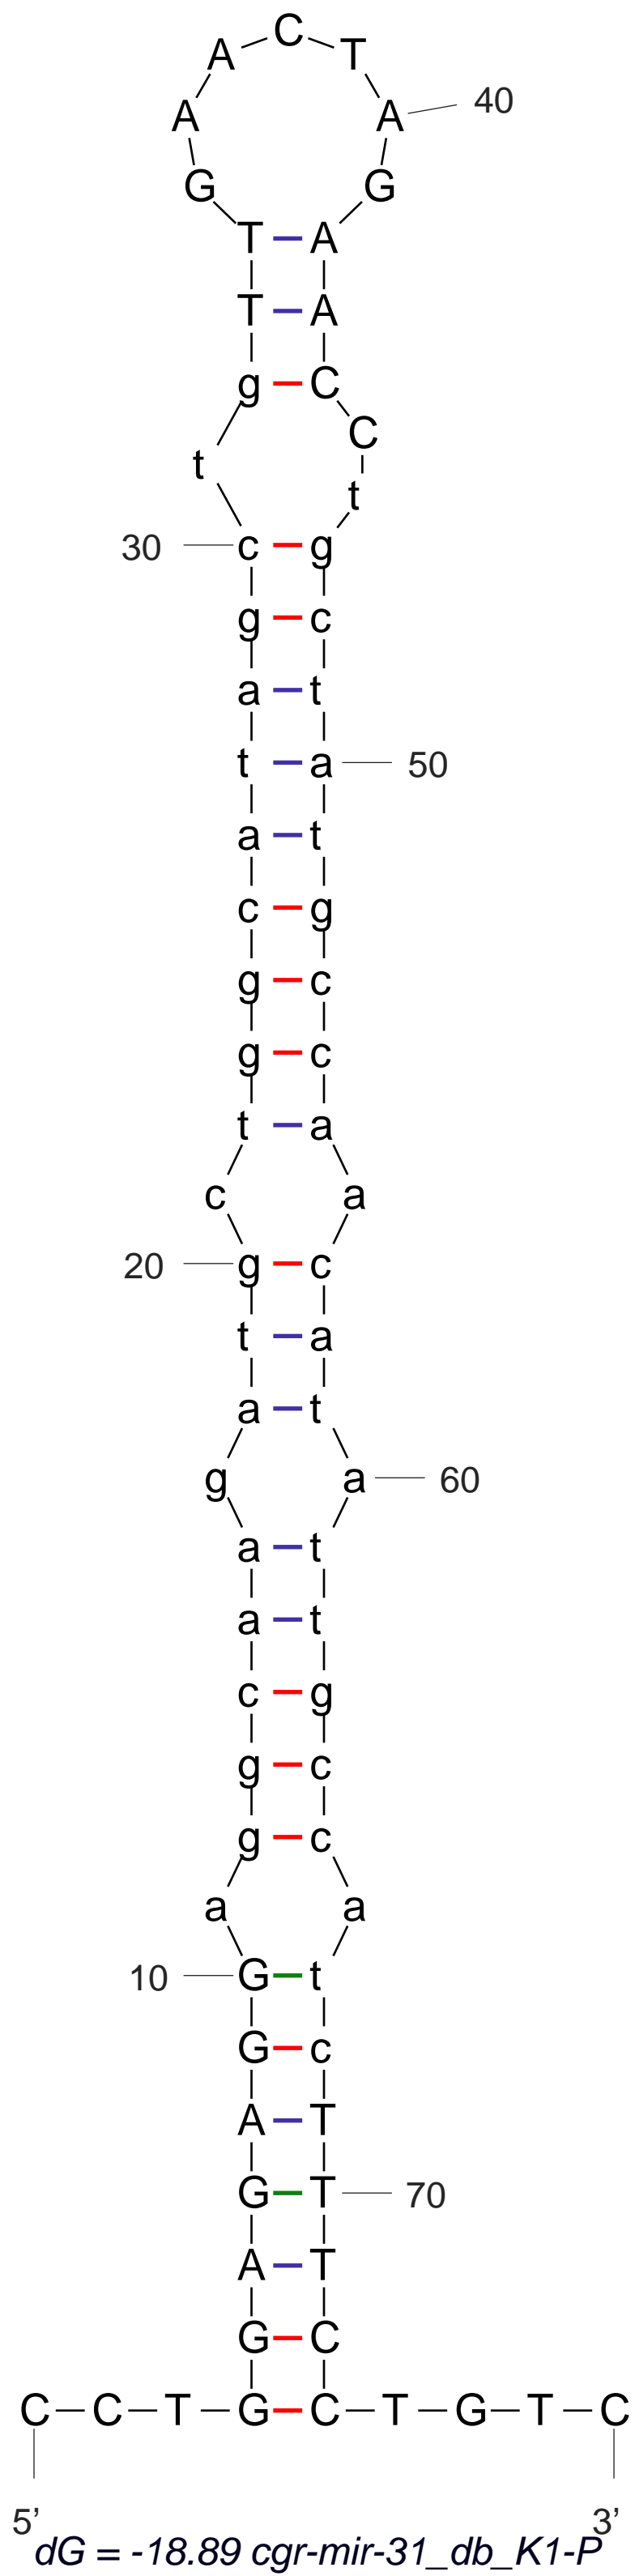

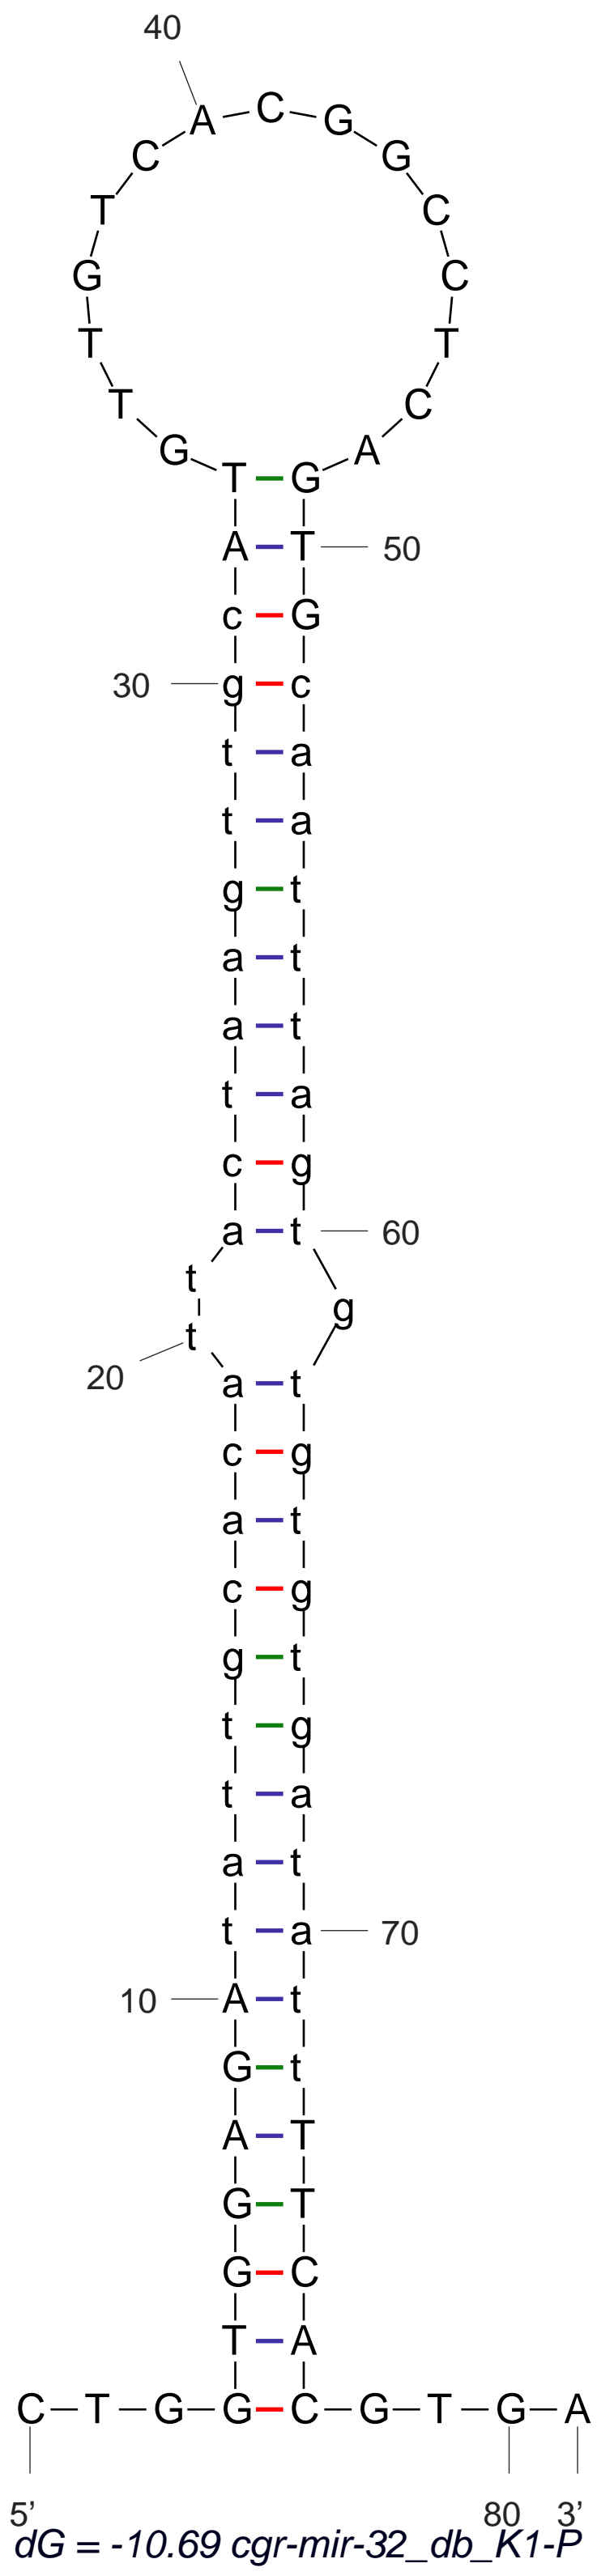

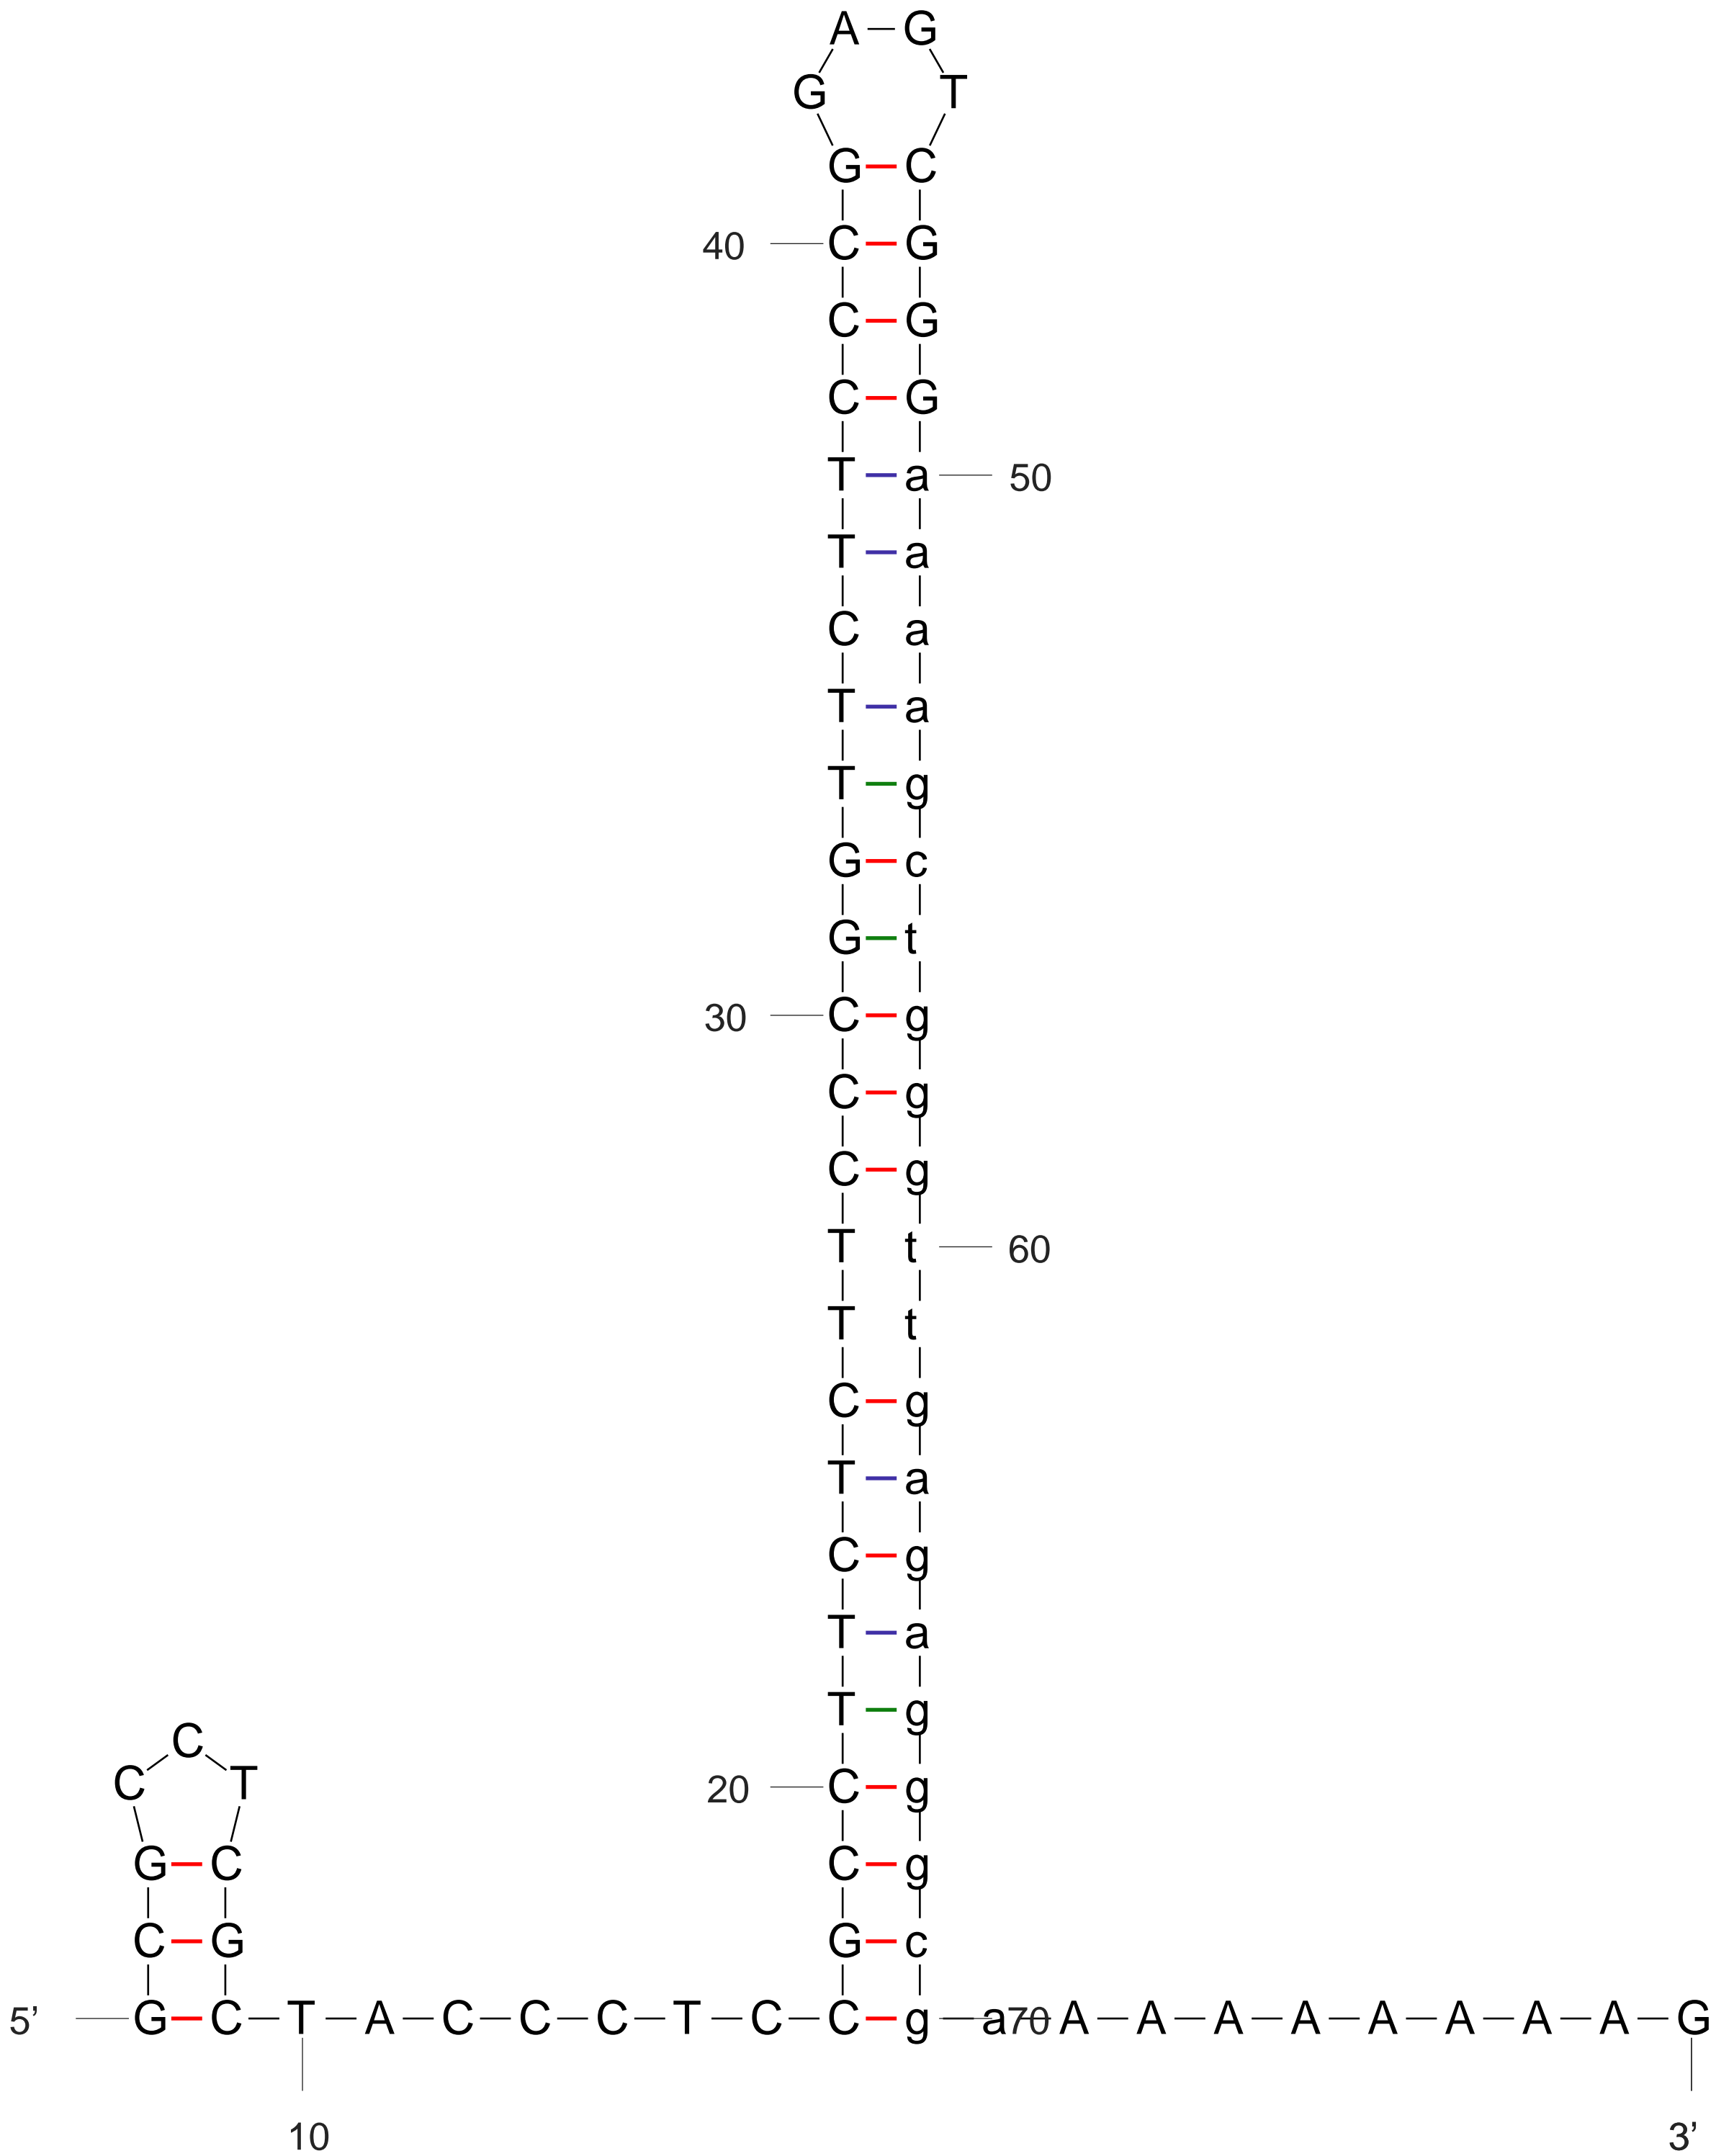

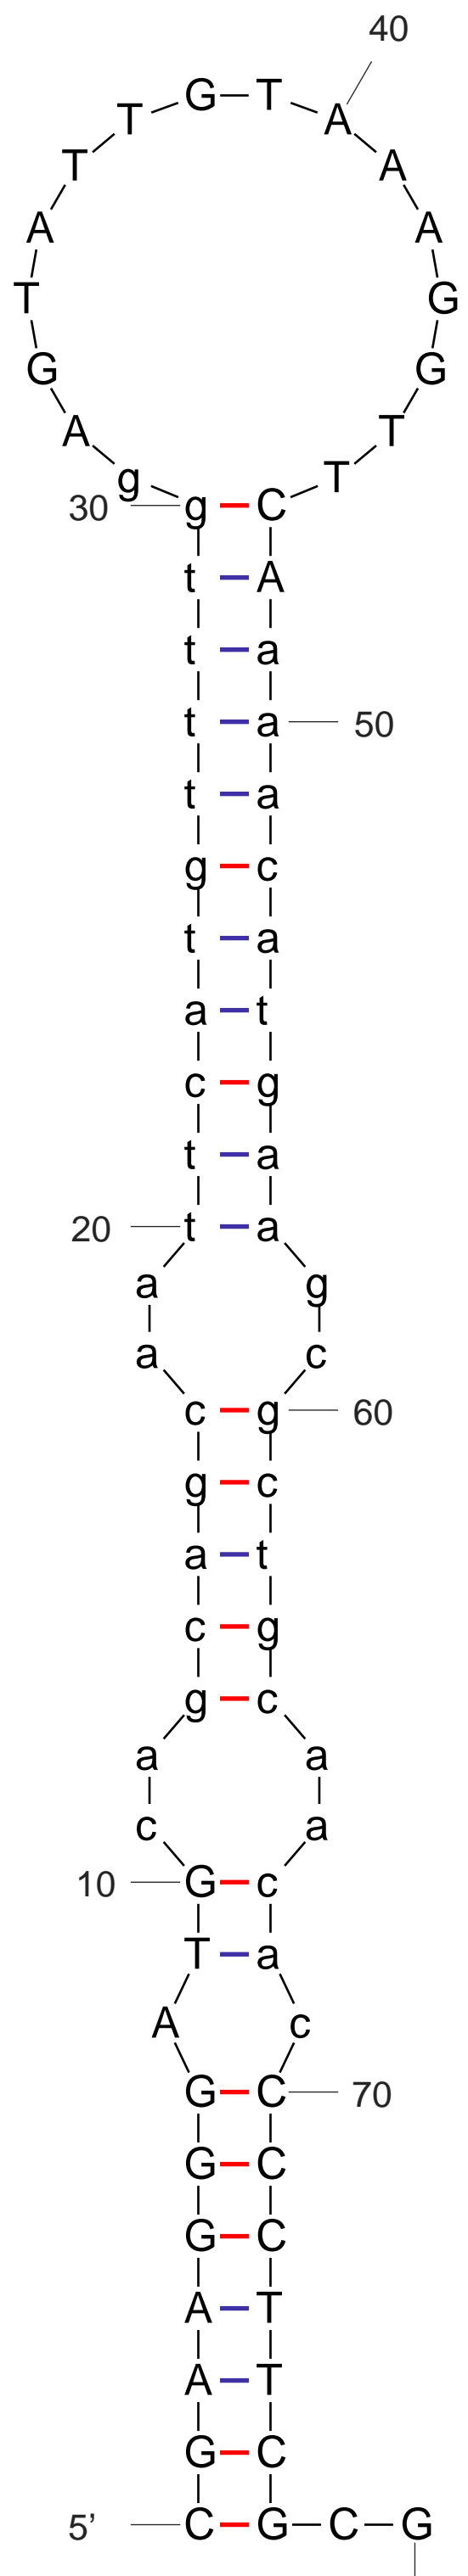

dG = -21.61 *cgr-mir-322\_db\_K1-P*

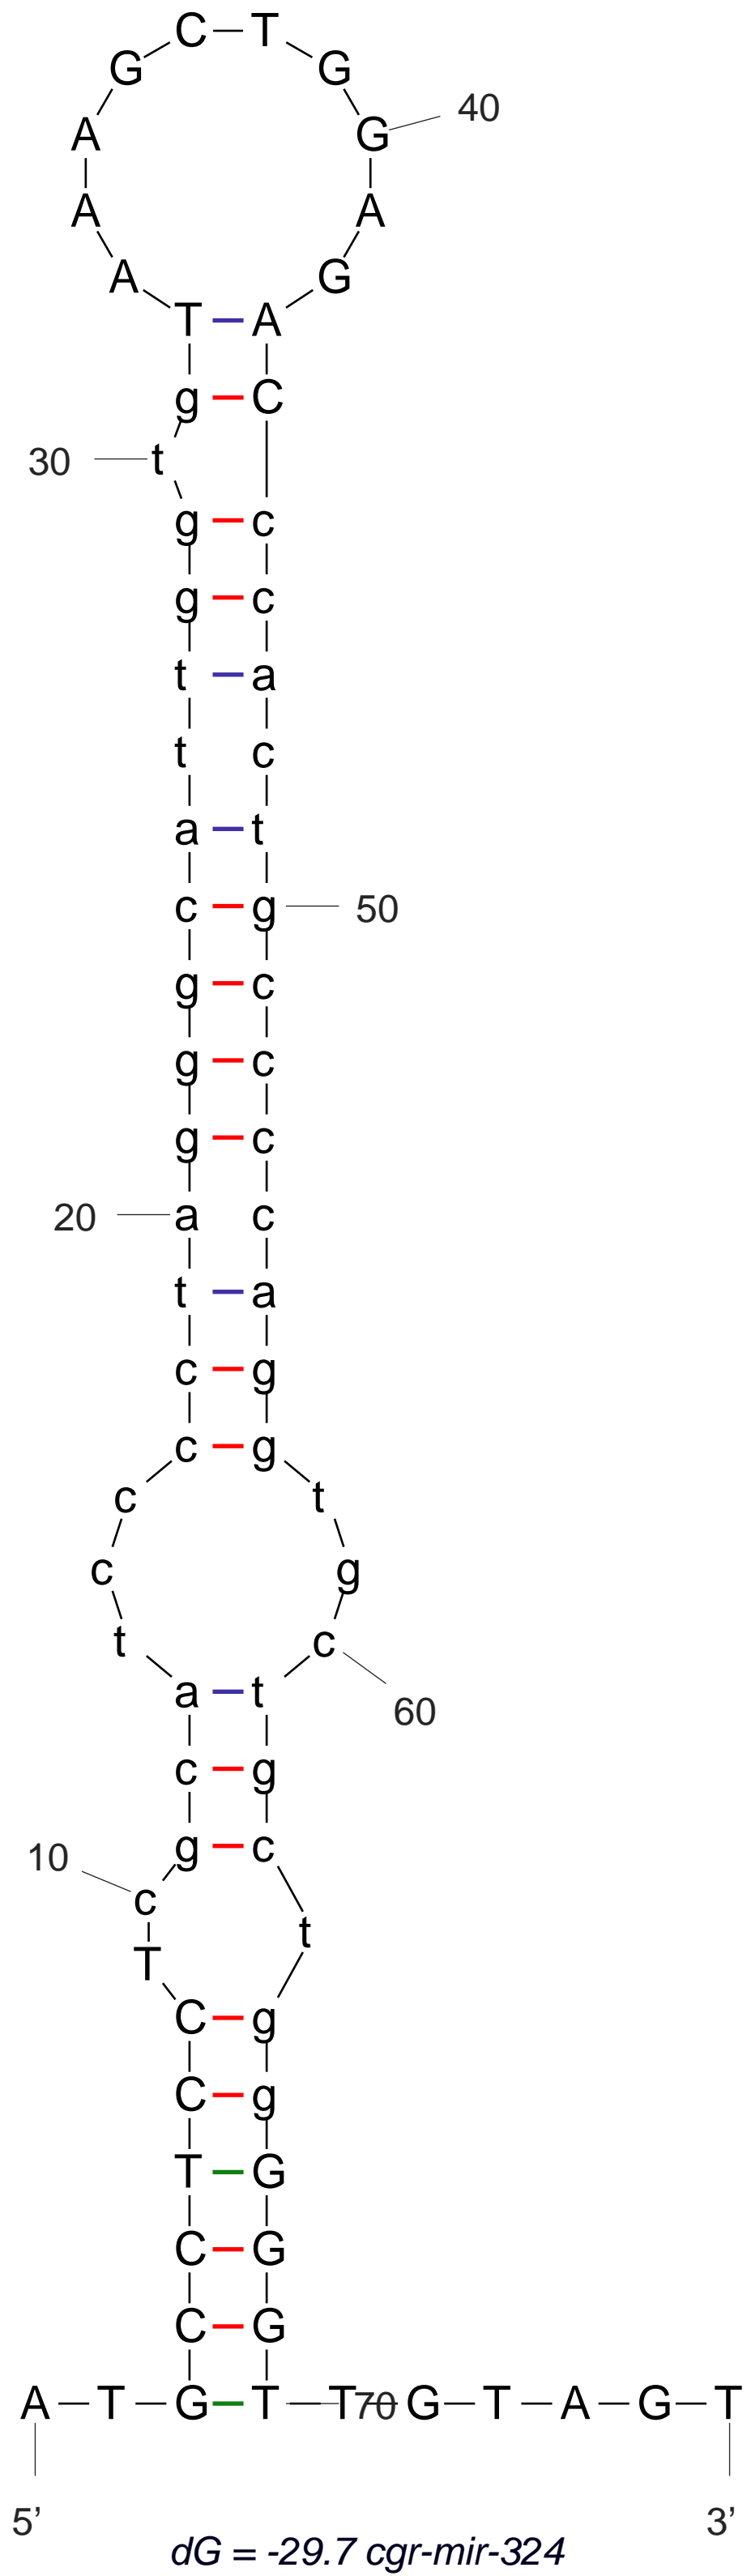





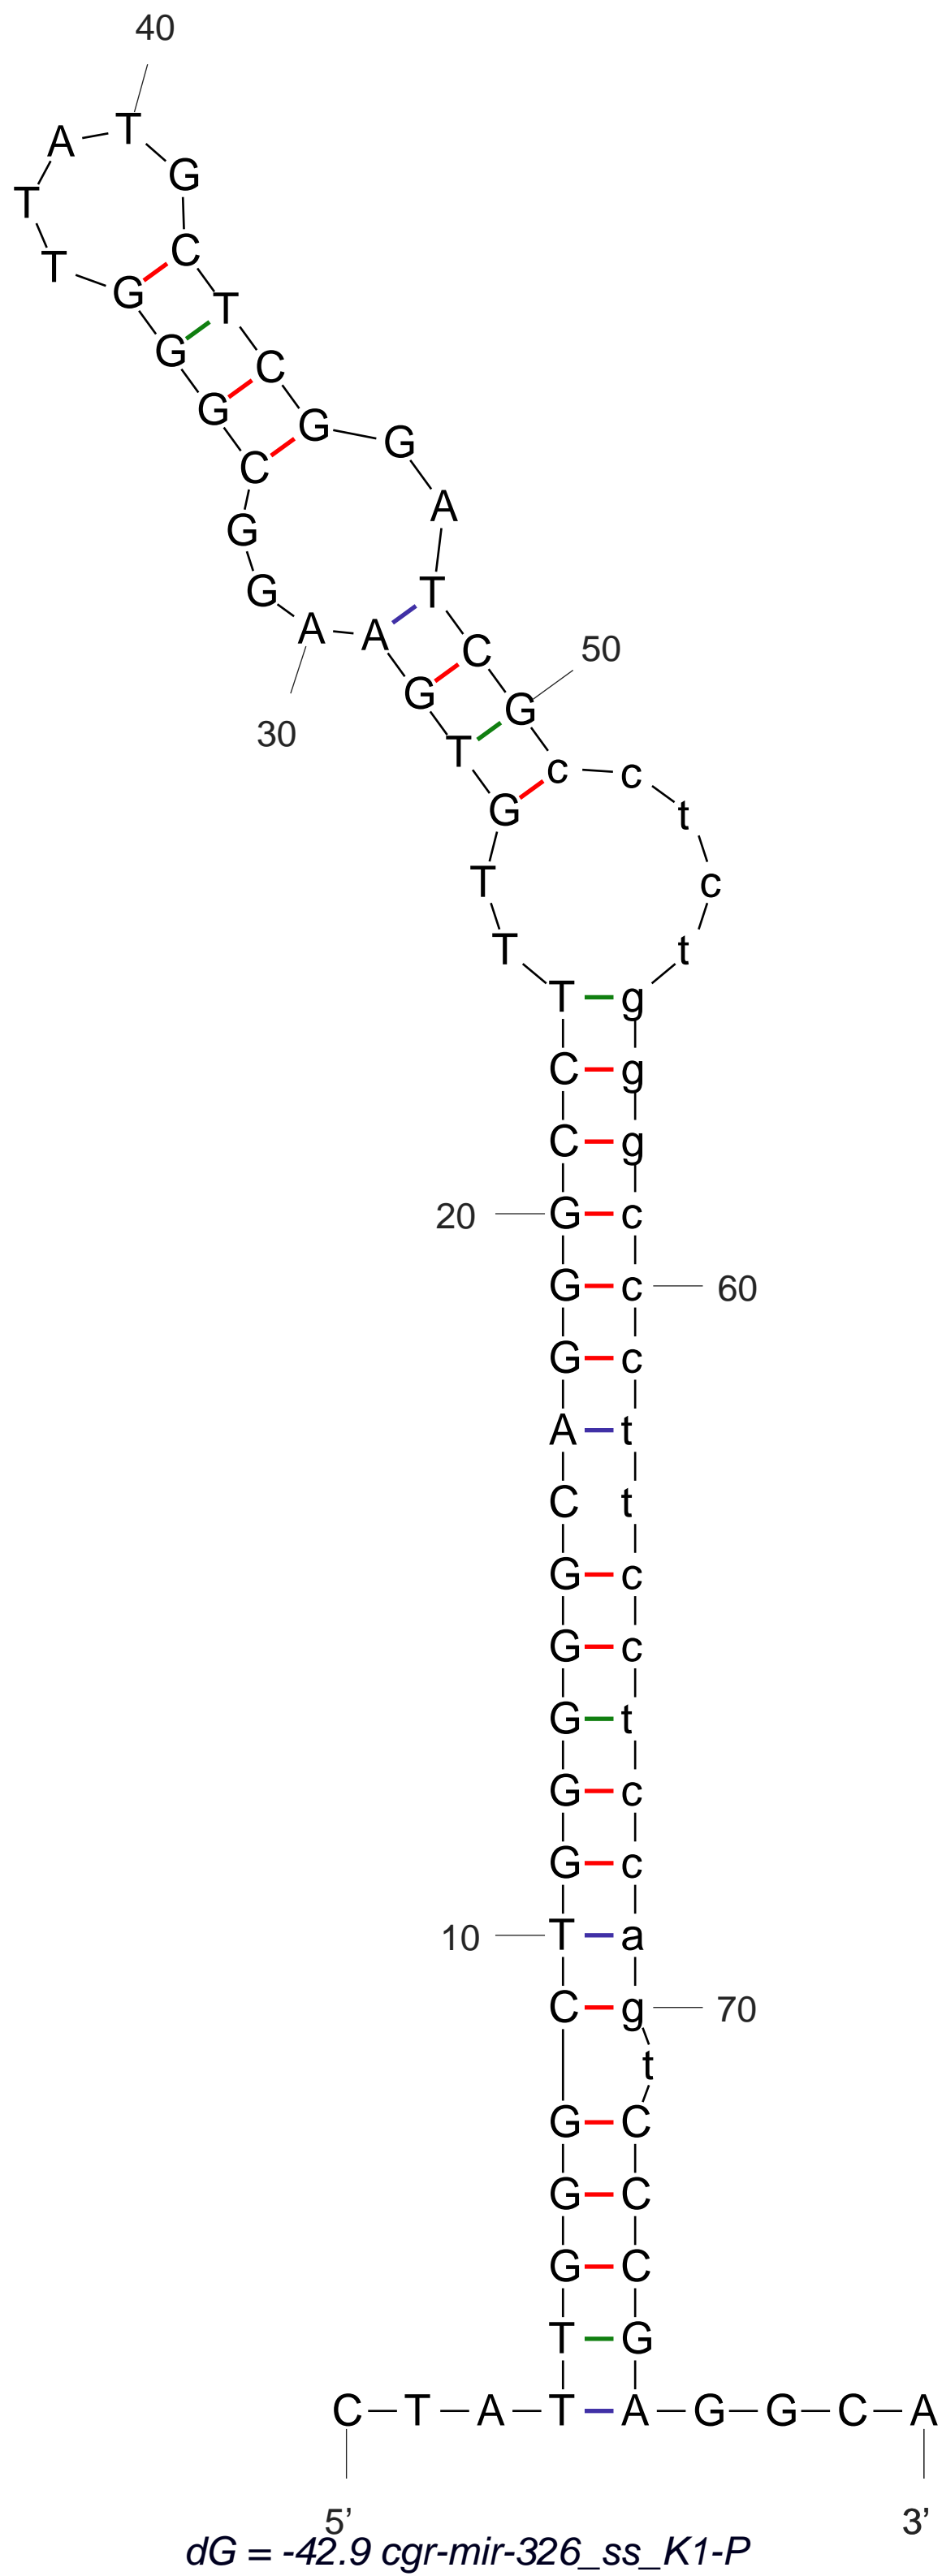

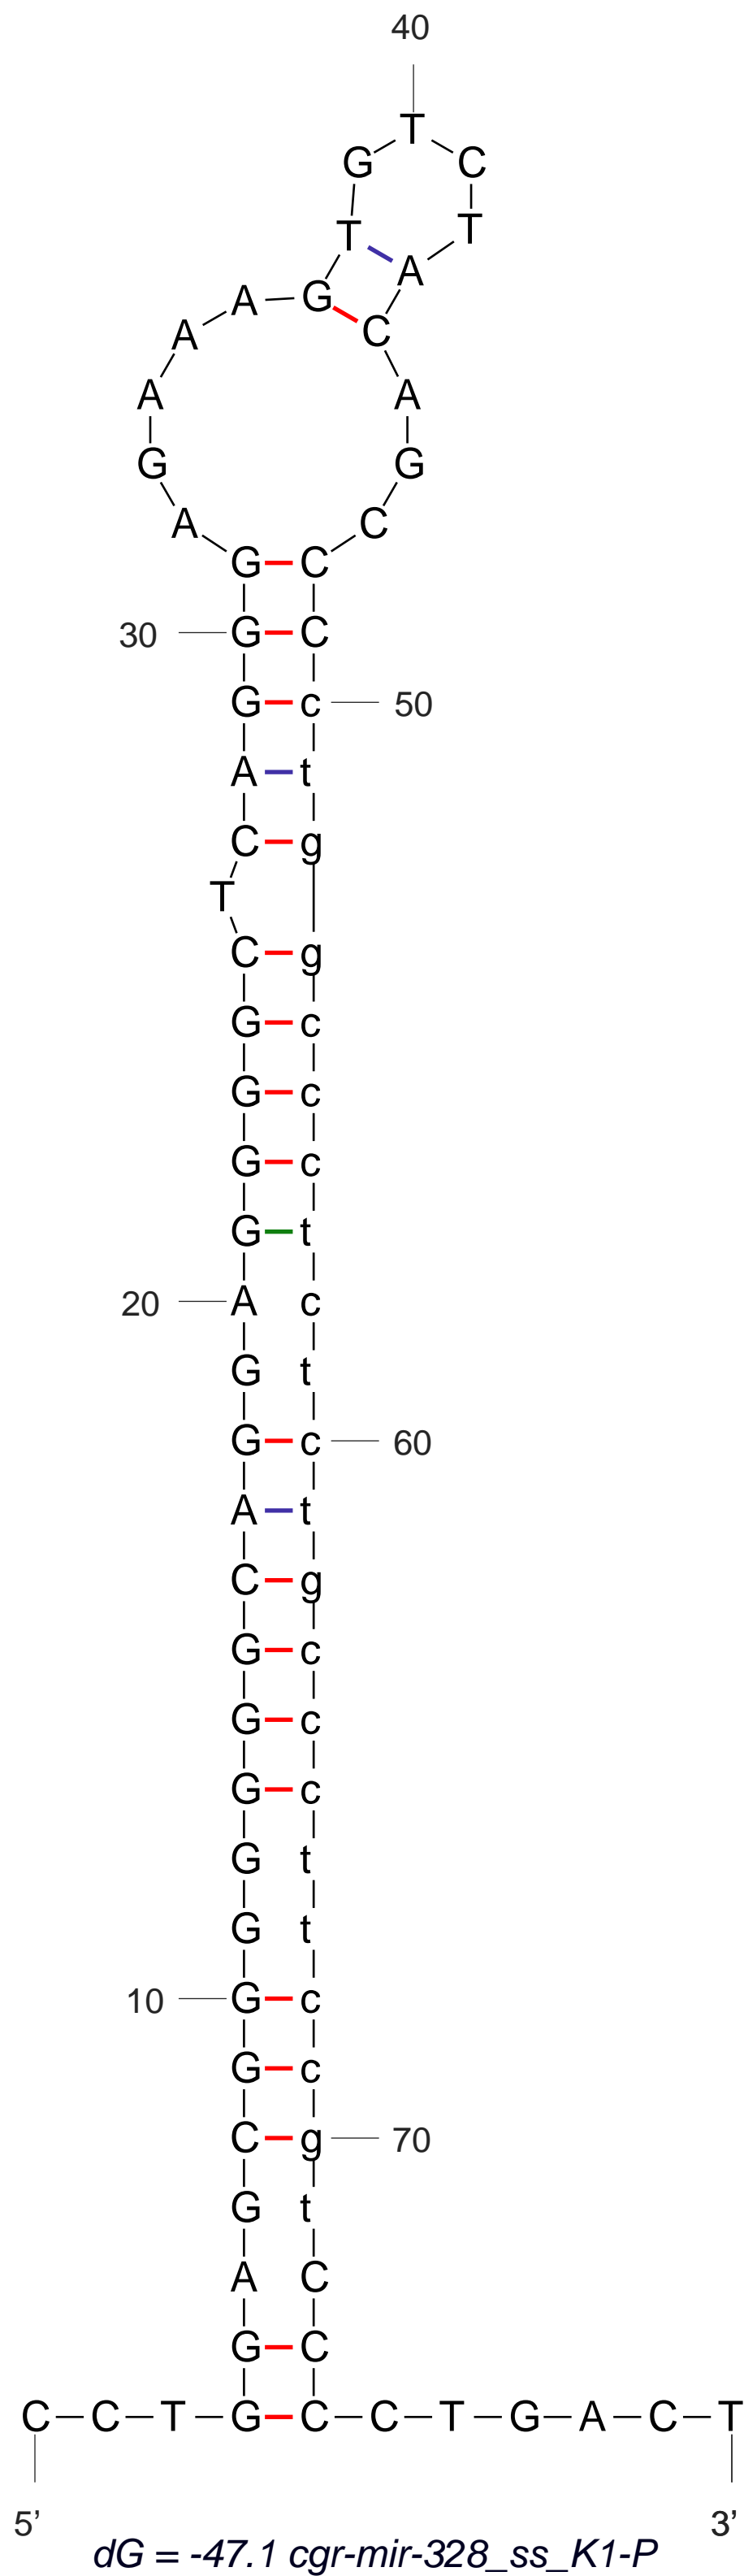

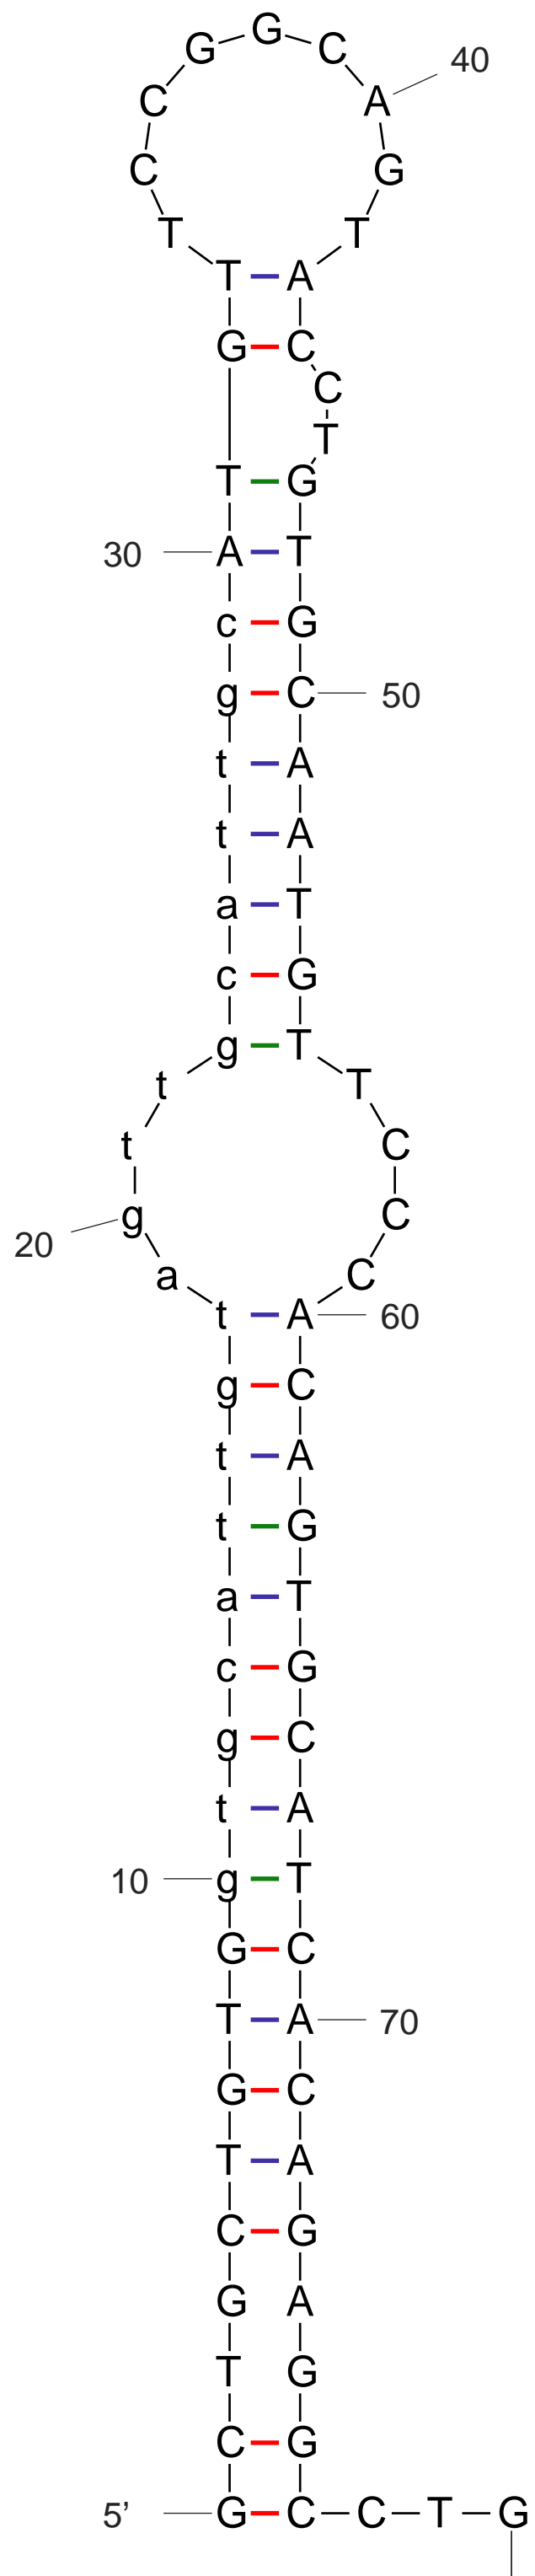

dG = -36 cgr-mir-33\_ss\_K1-P

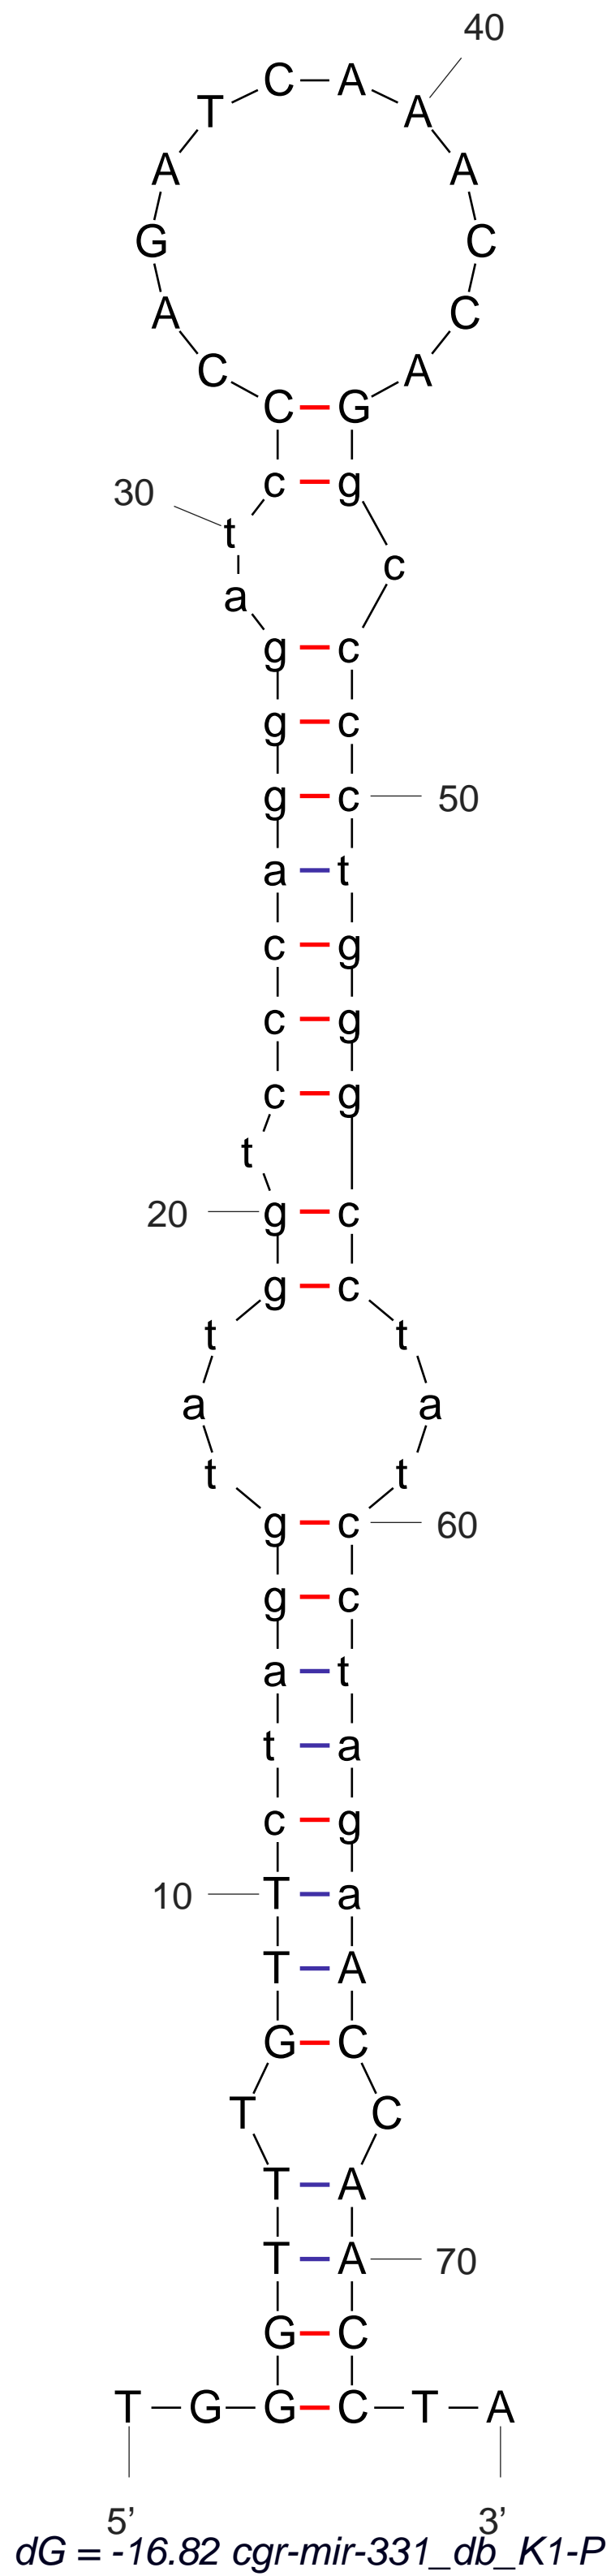



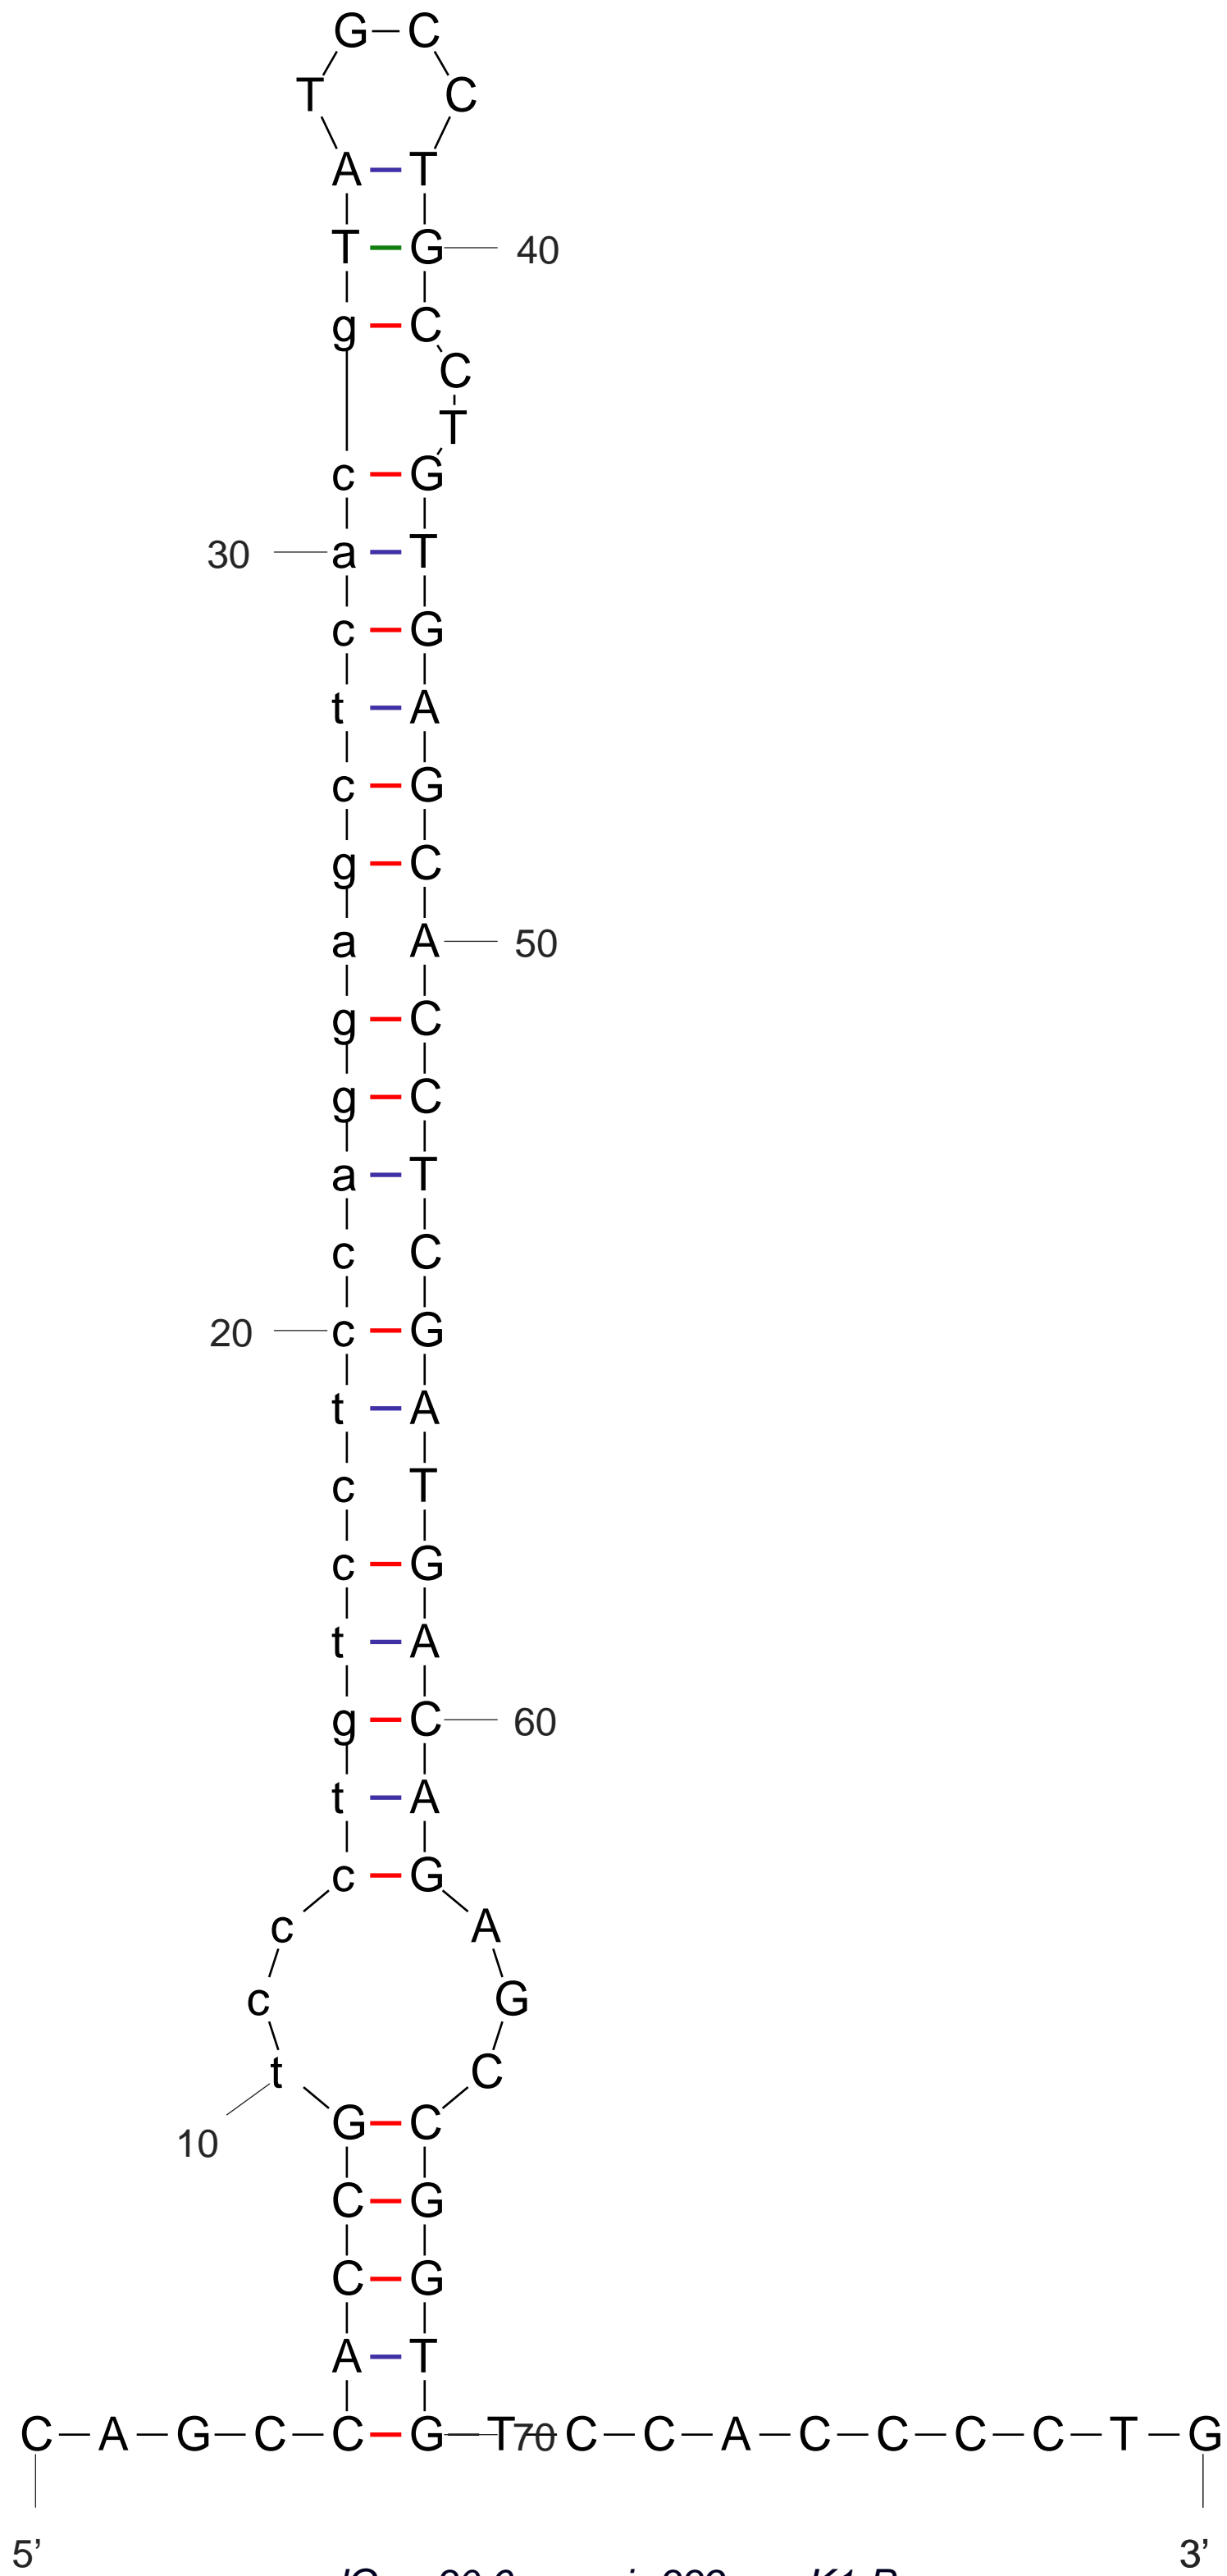

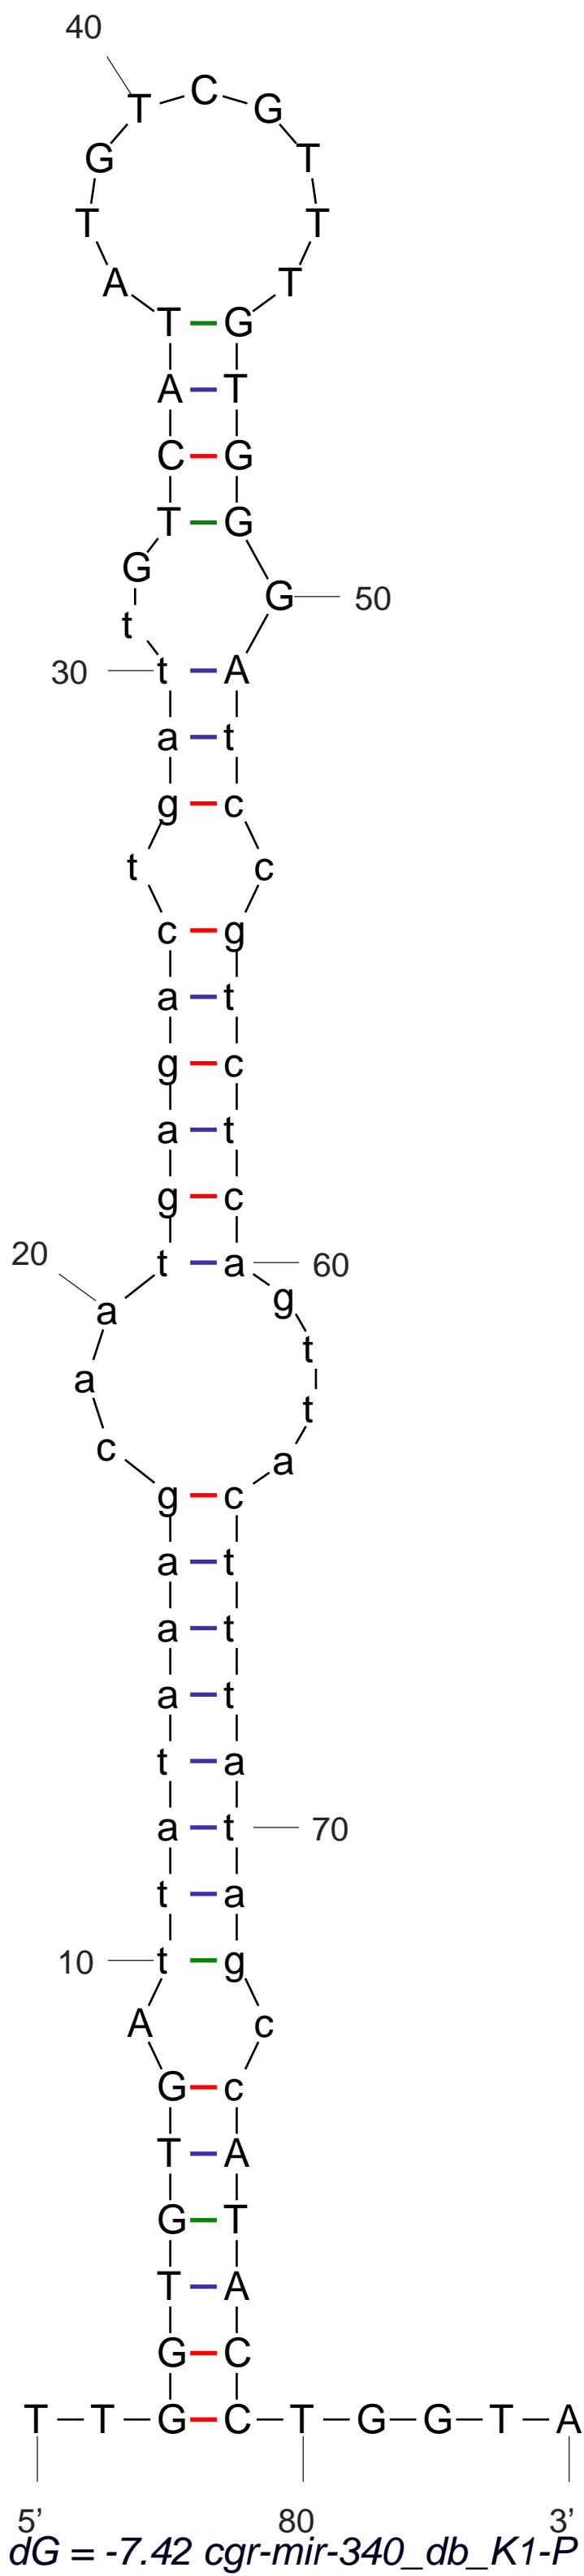



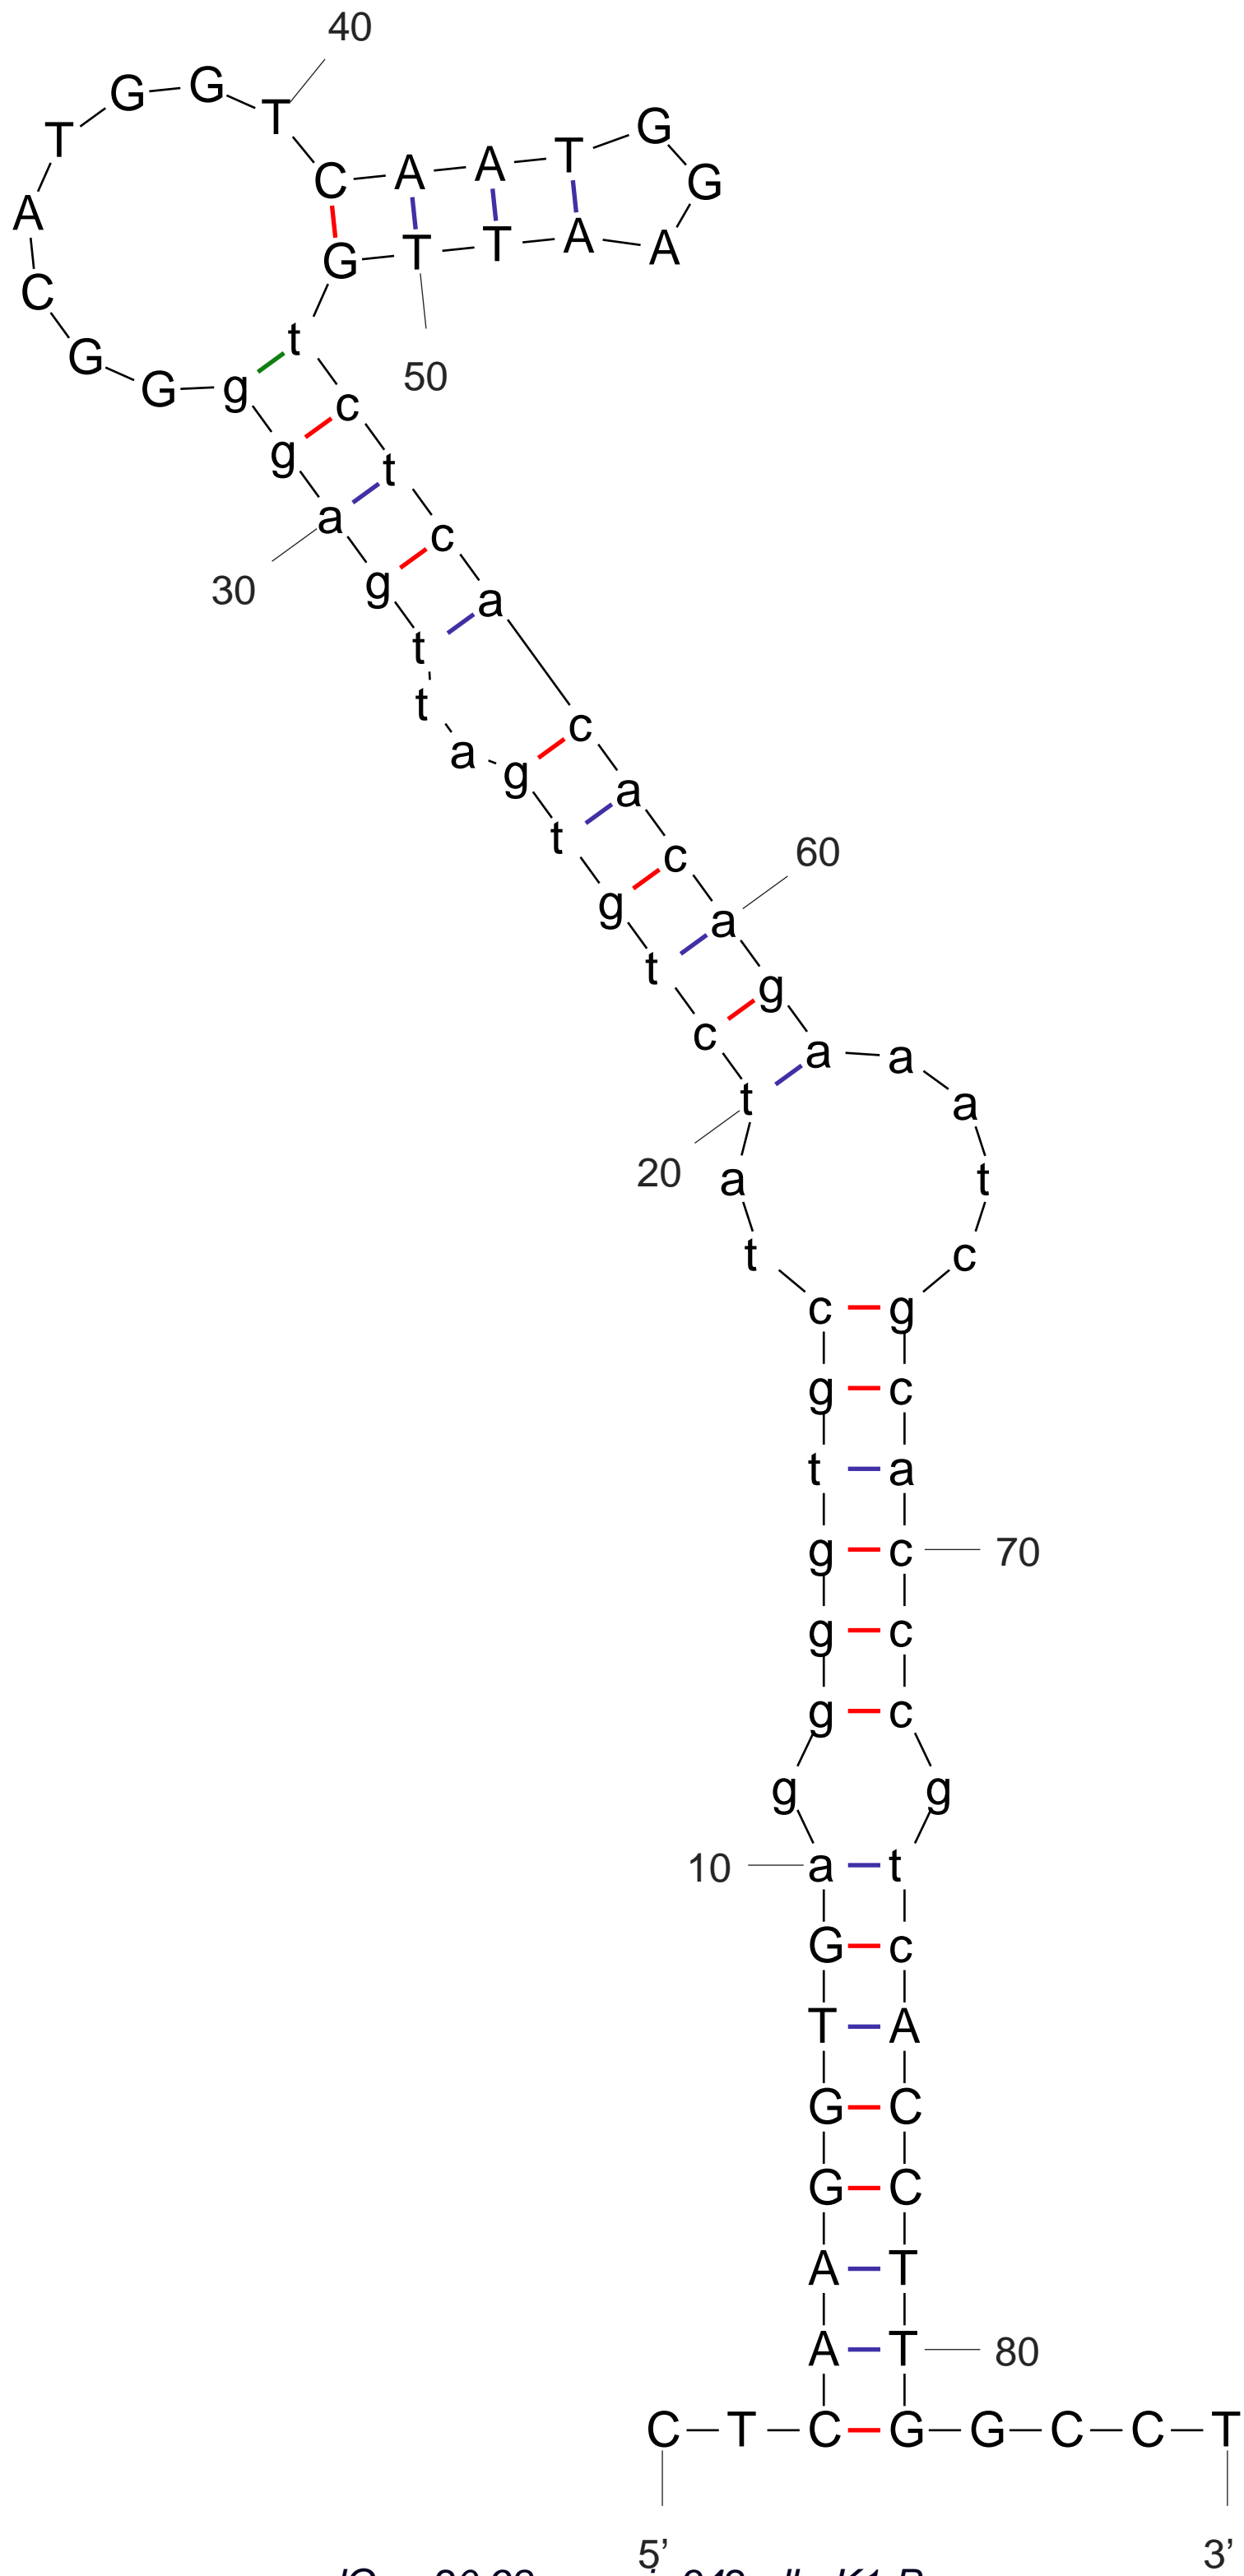

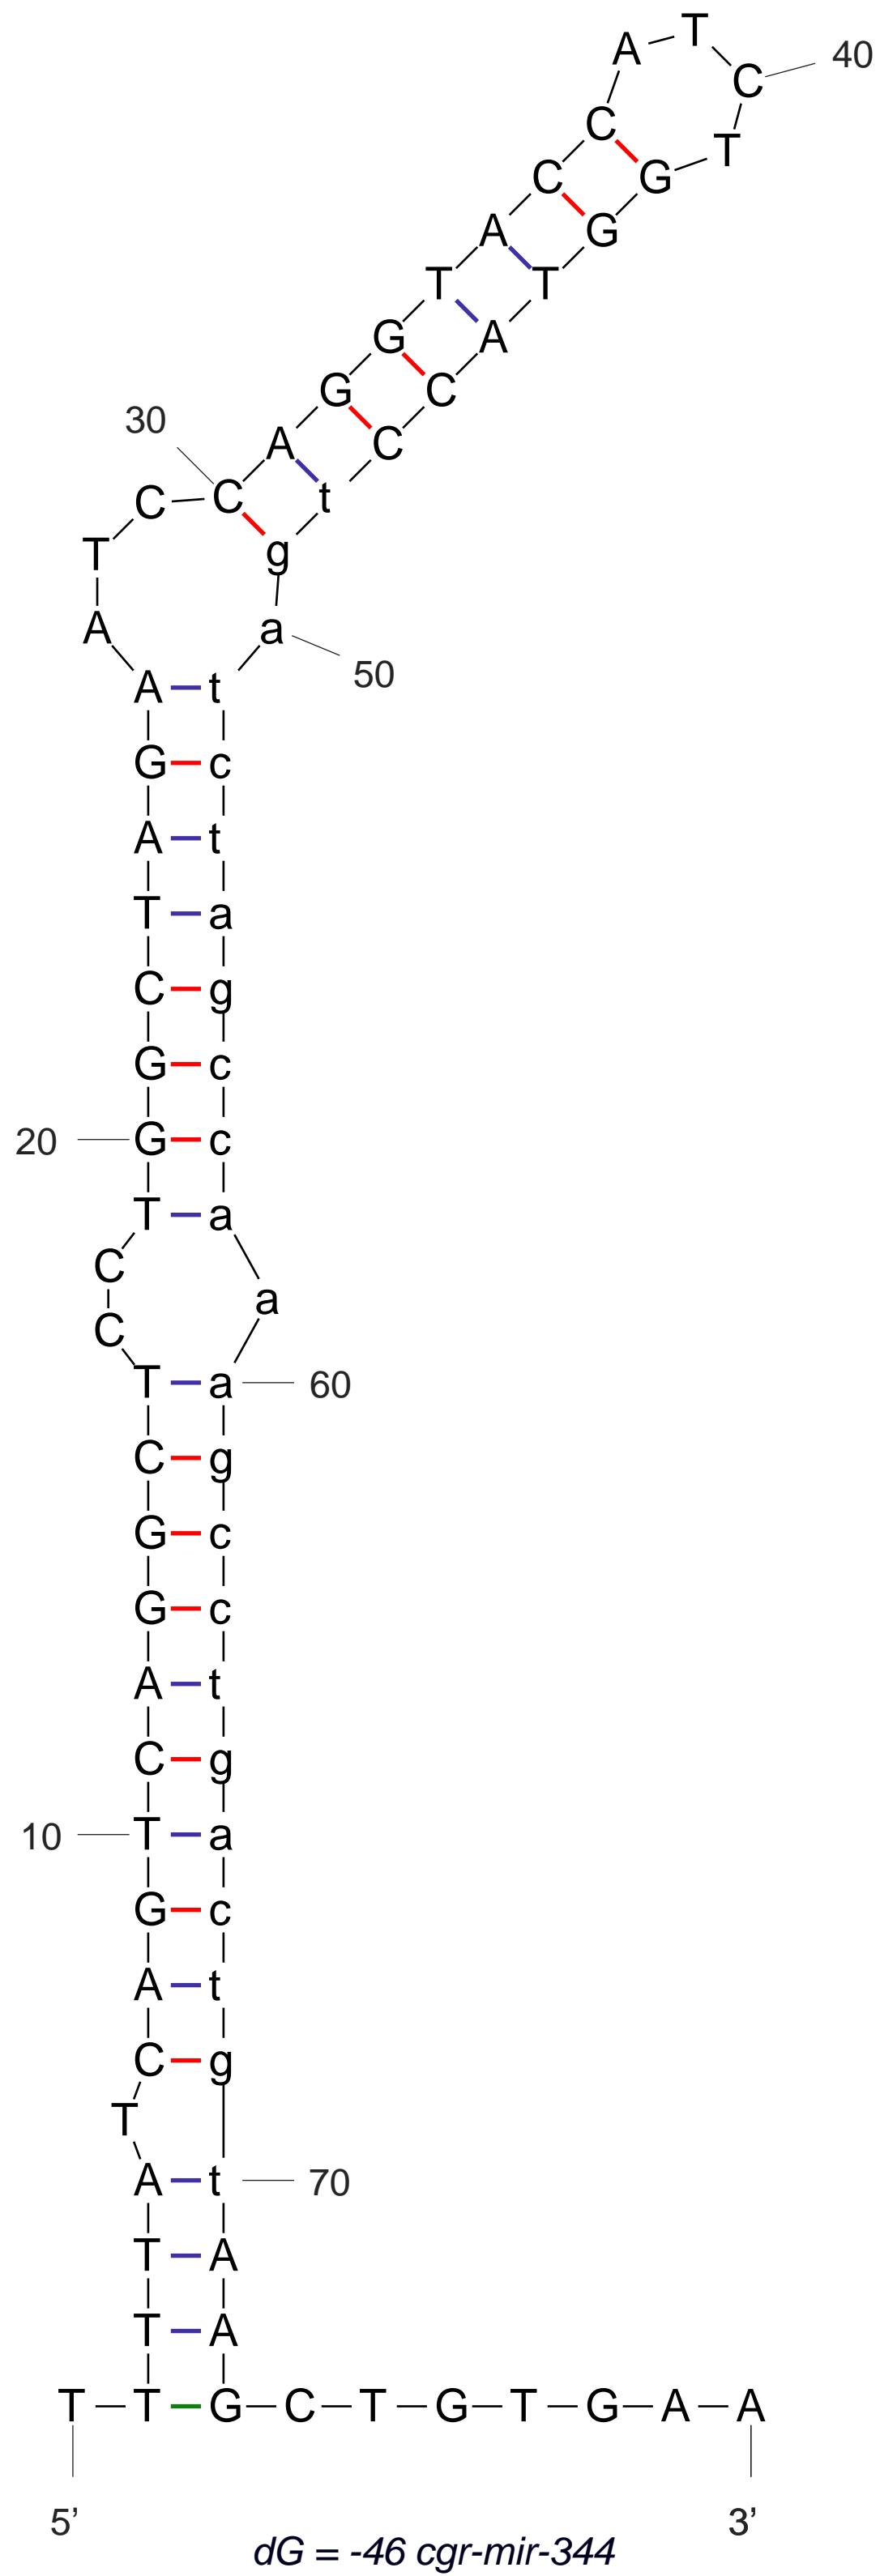



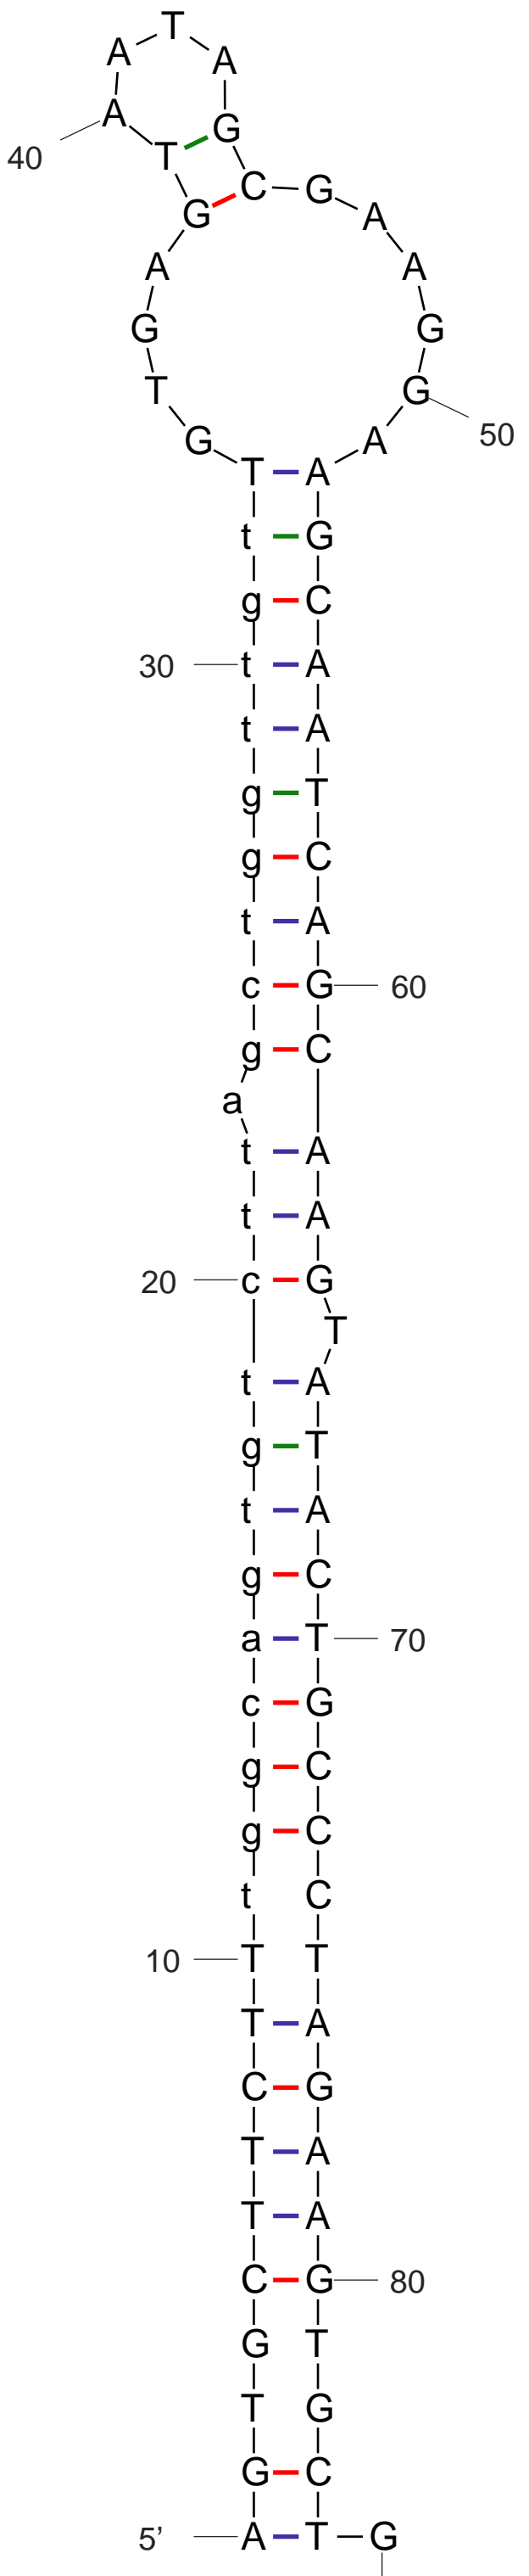

dG = -40.9 cgr-mir-34a

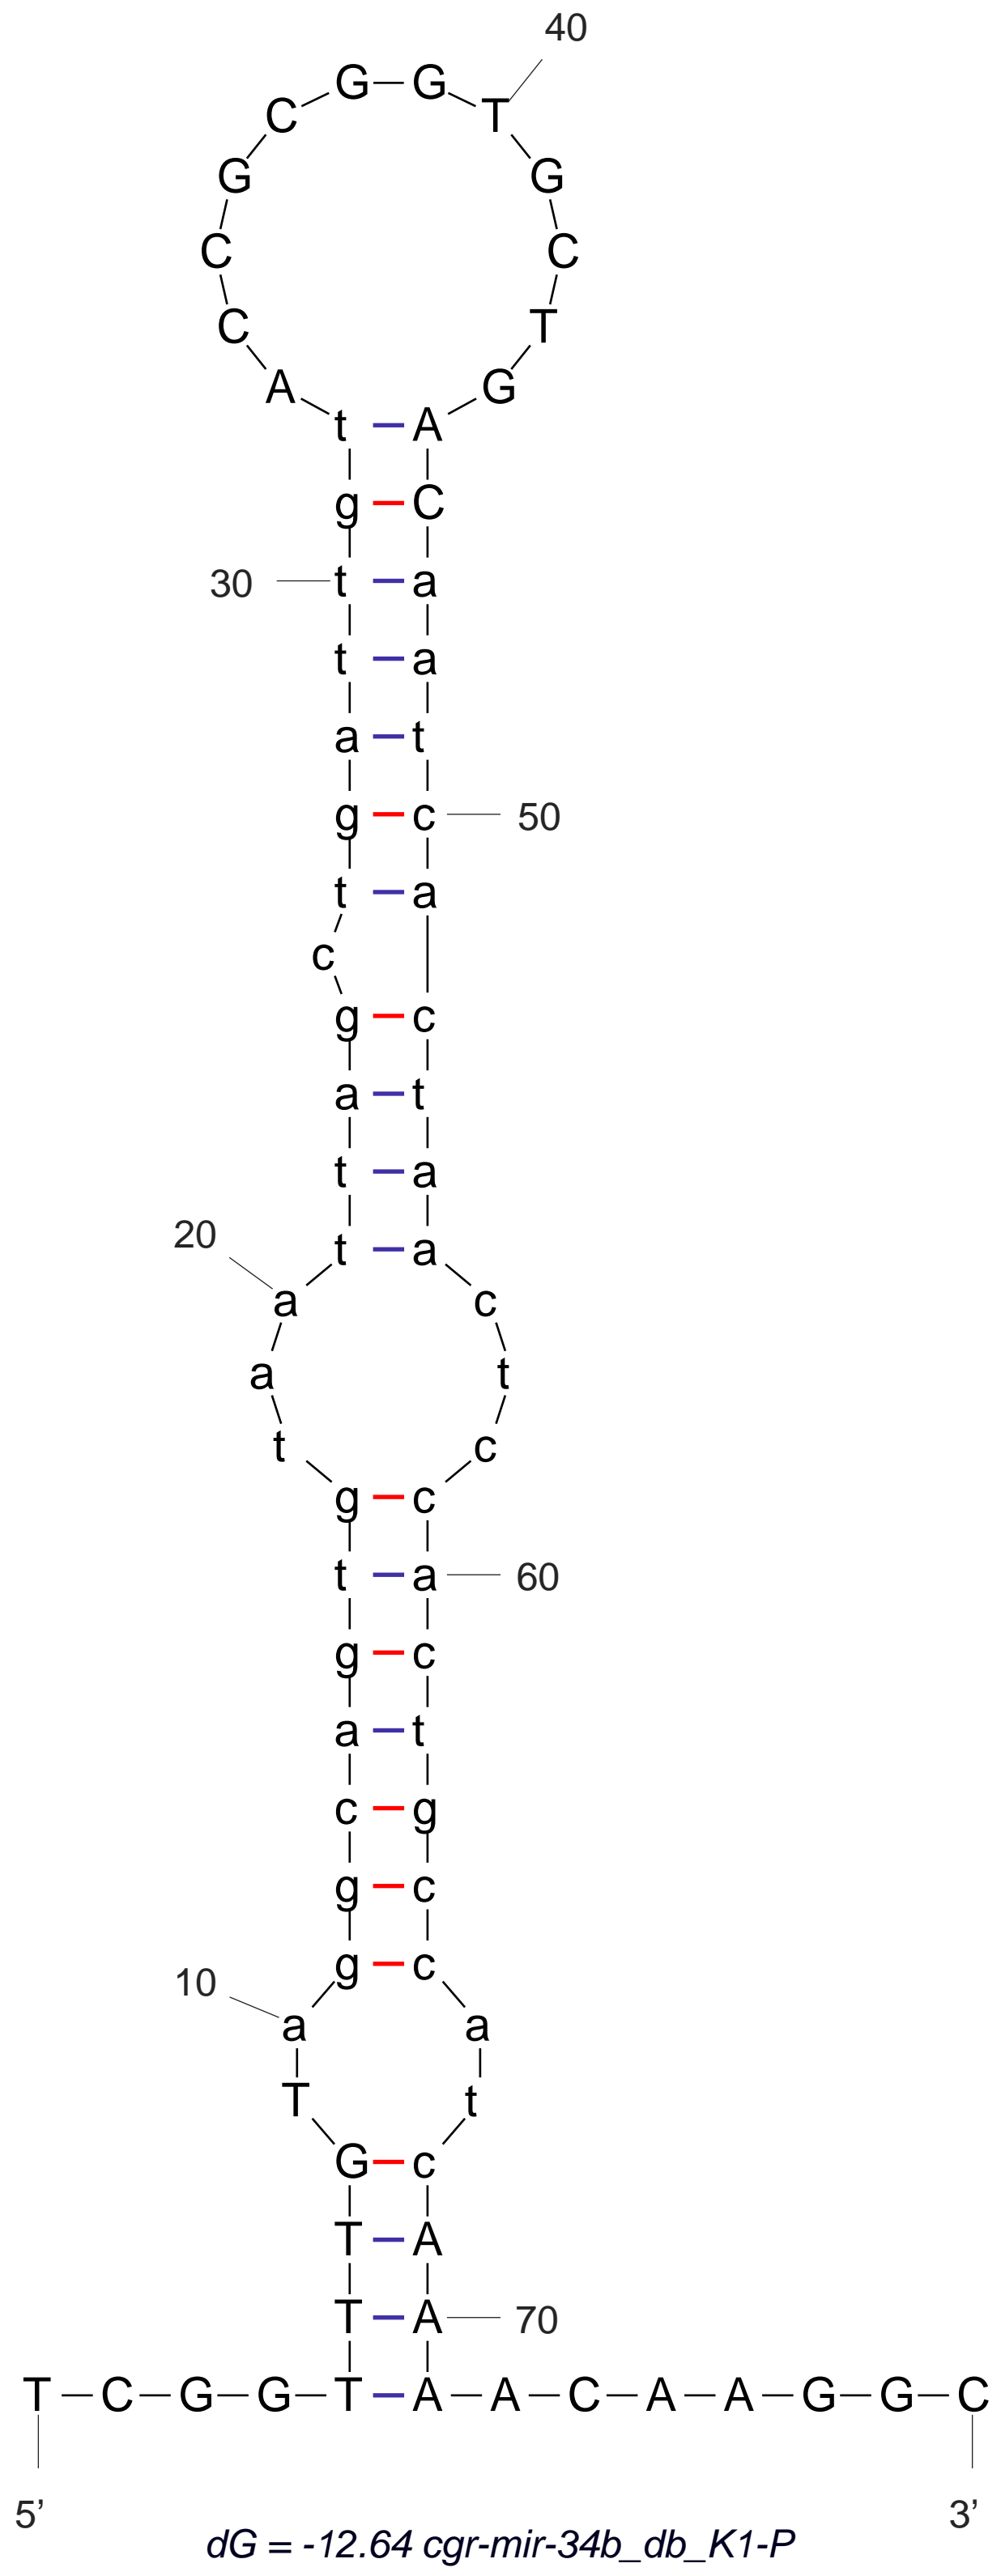

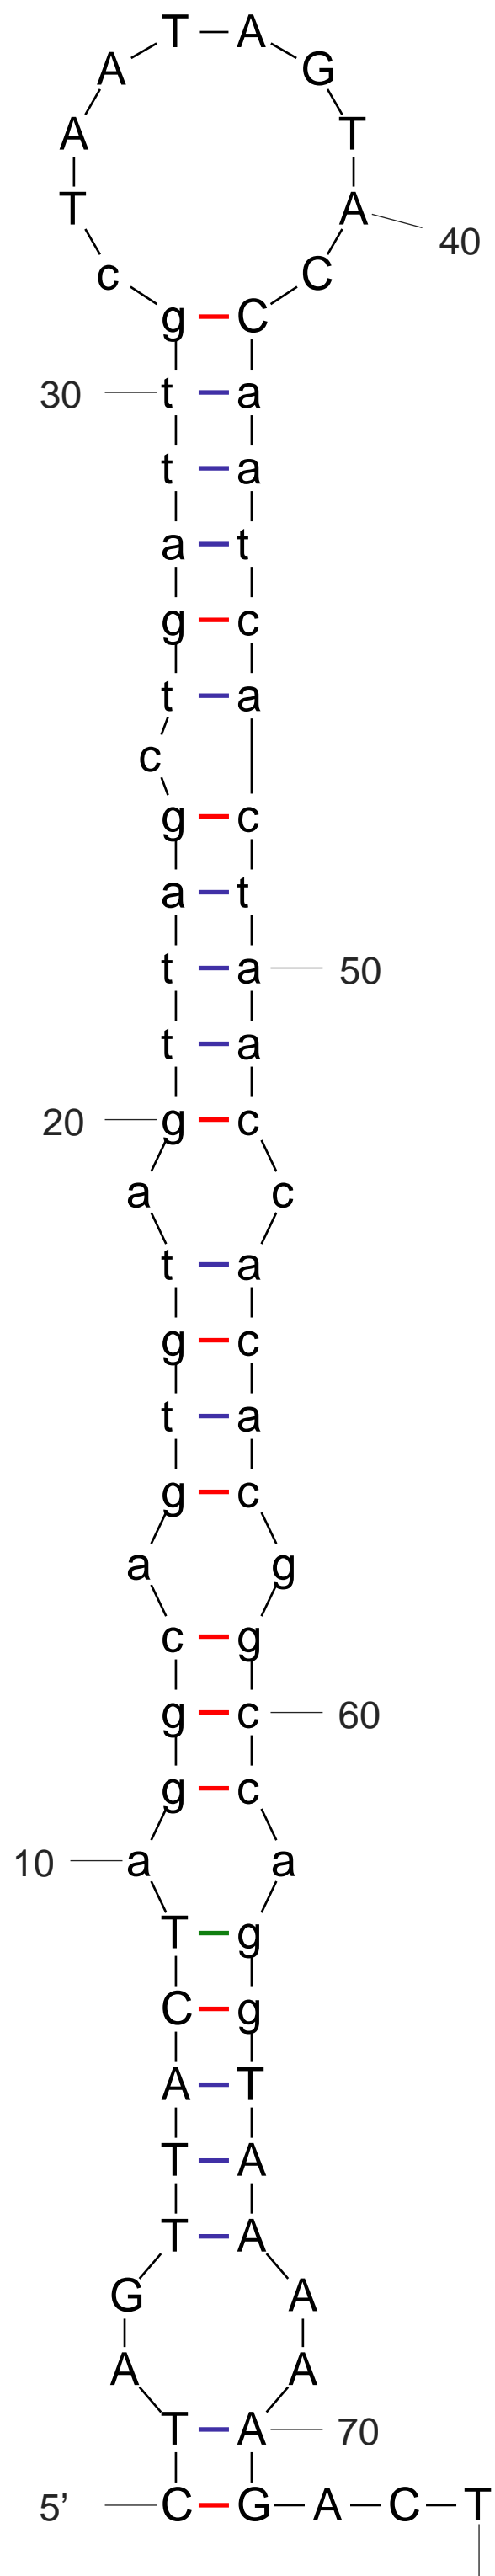

dG = -12.46 *cgr-mir-34c\_db\_K1-P*

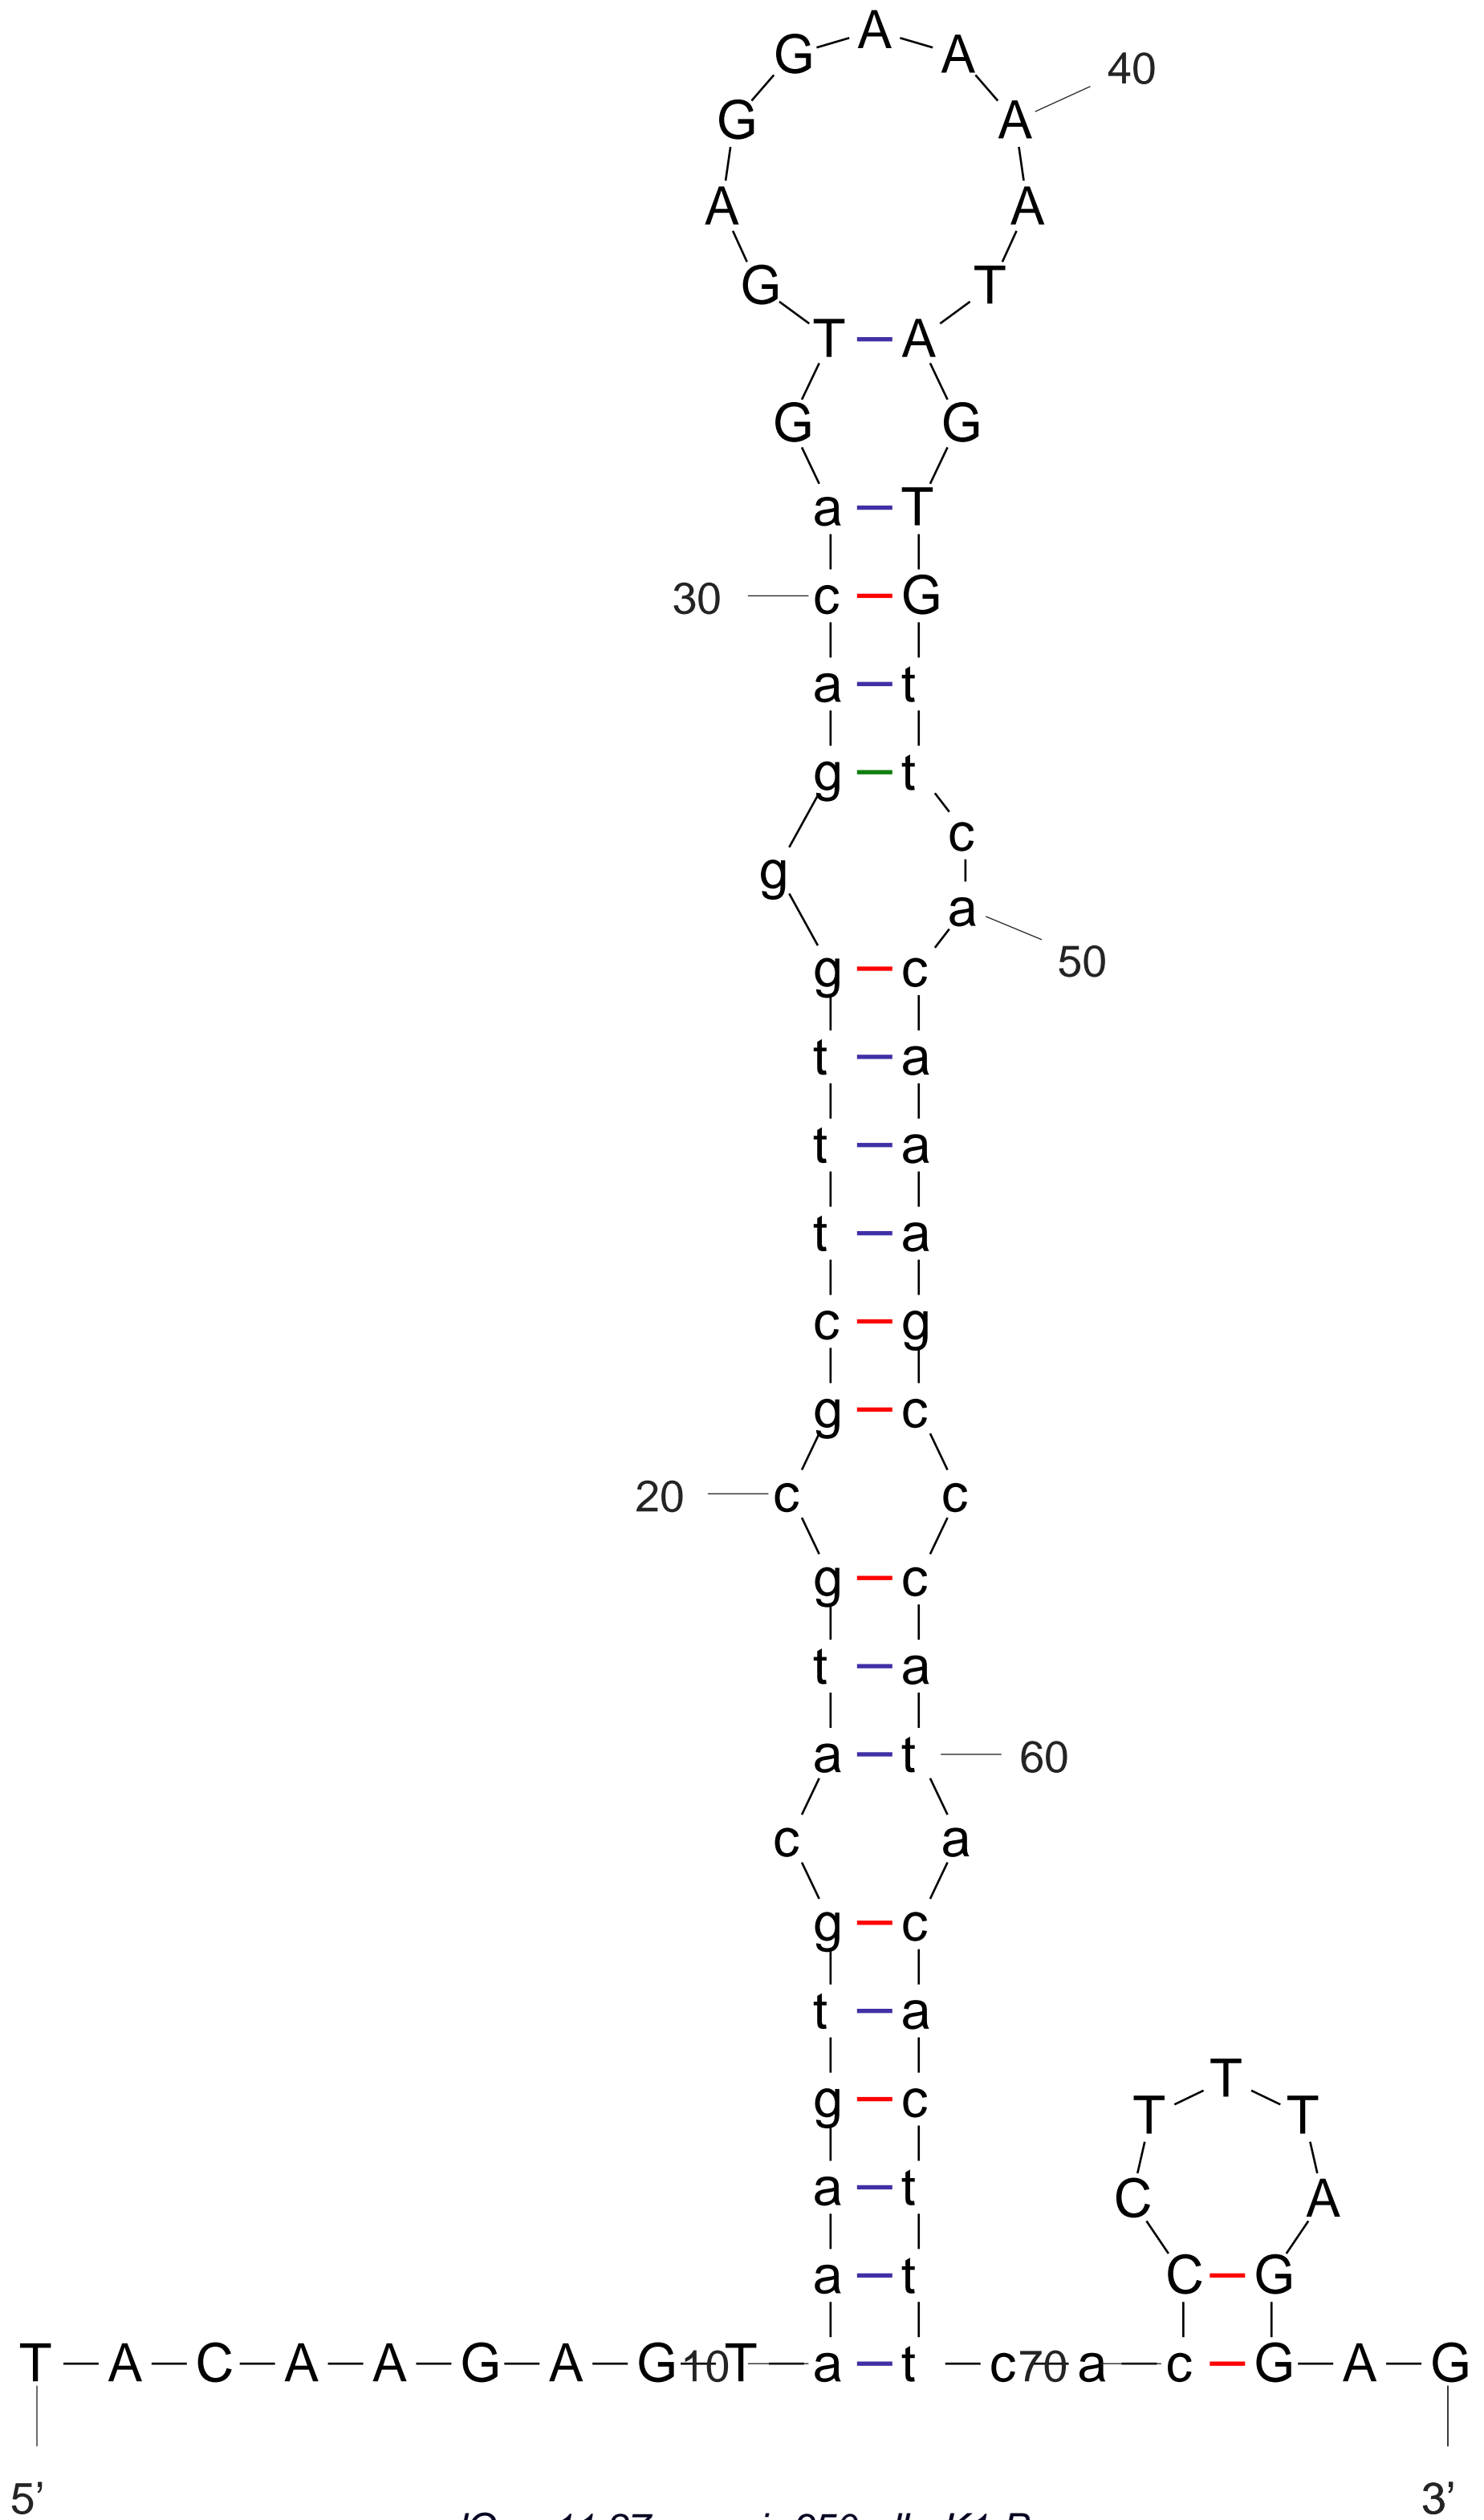

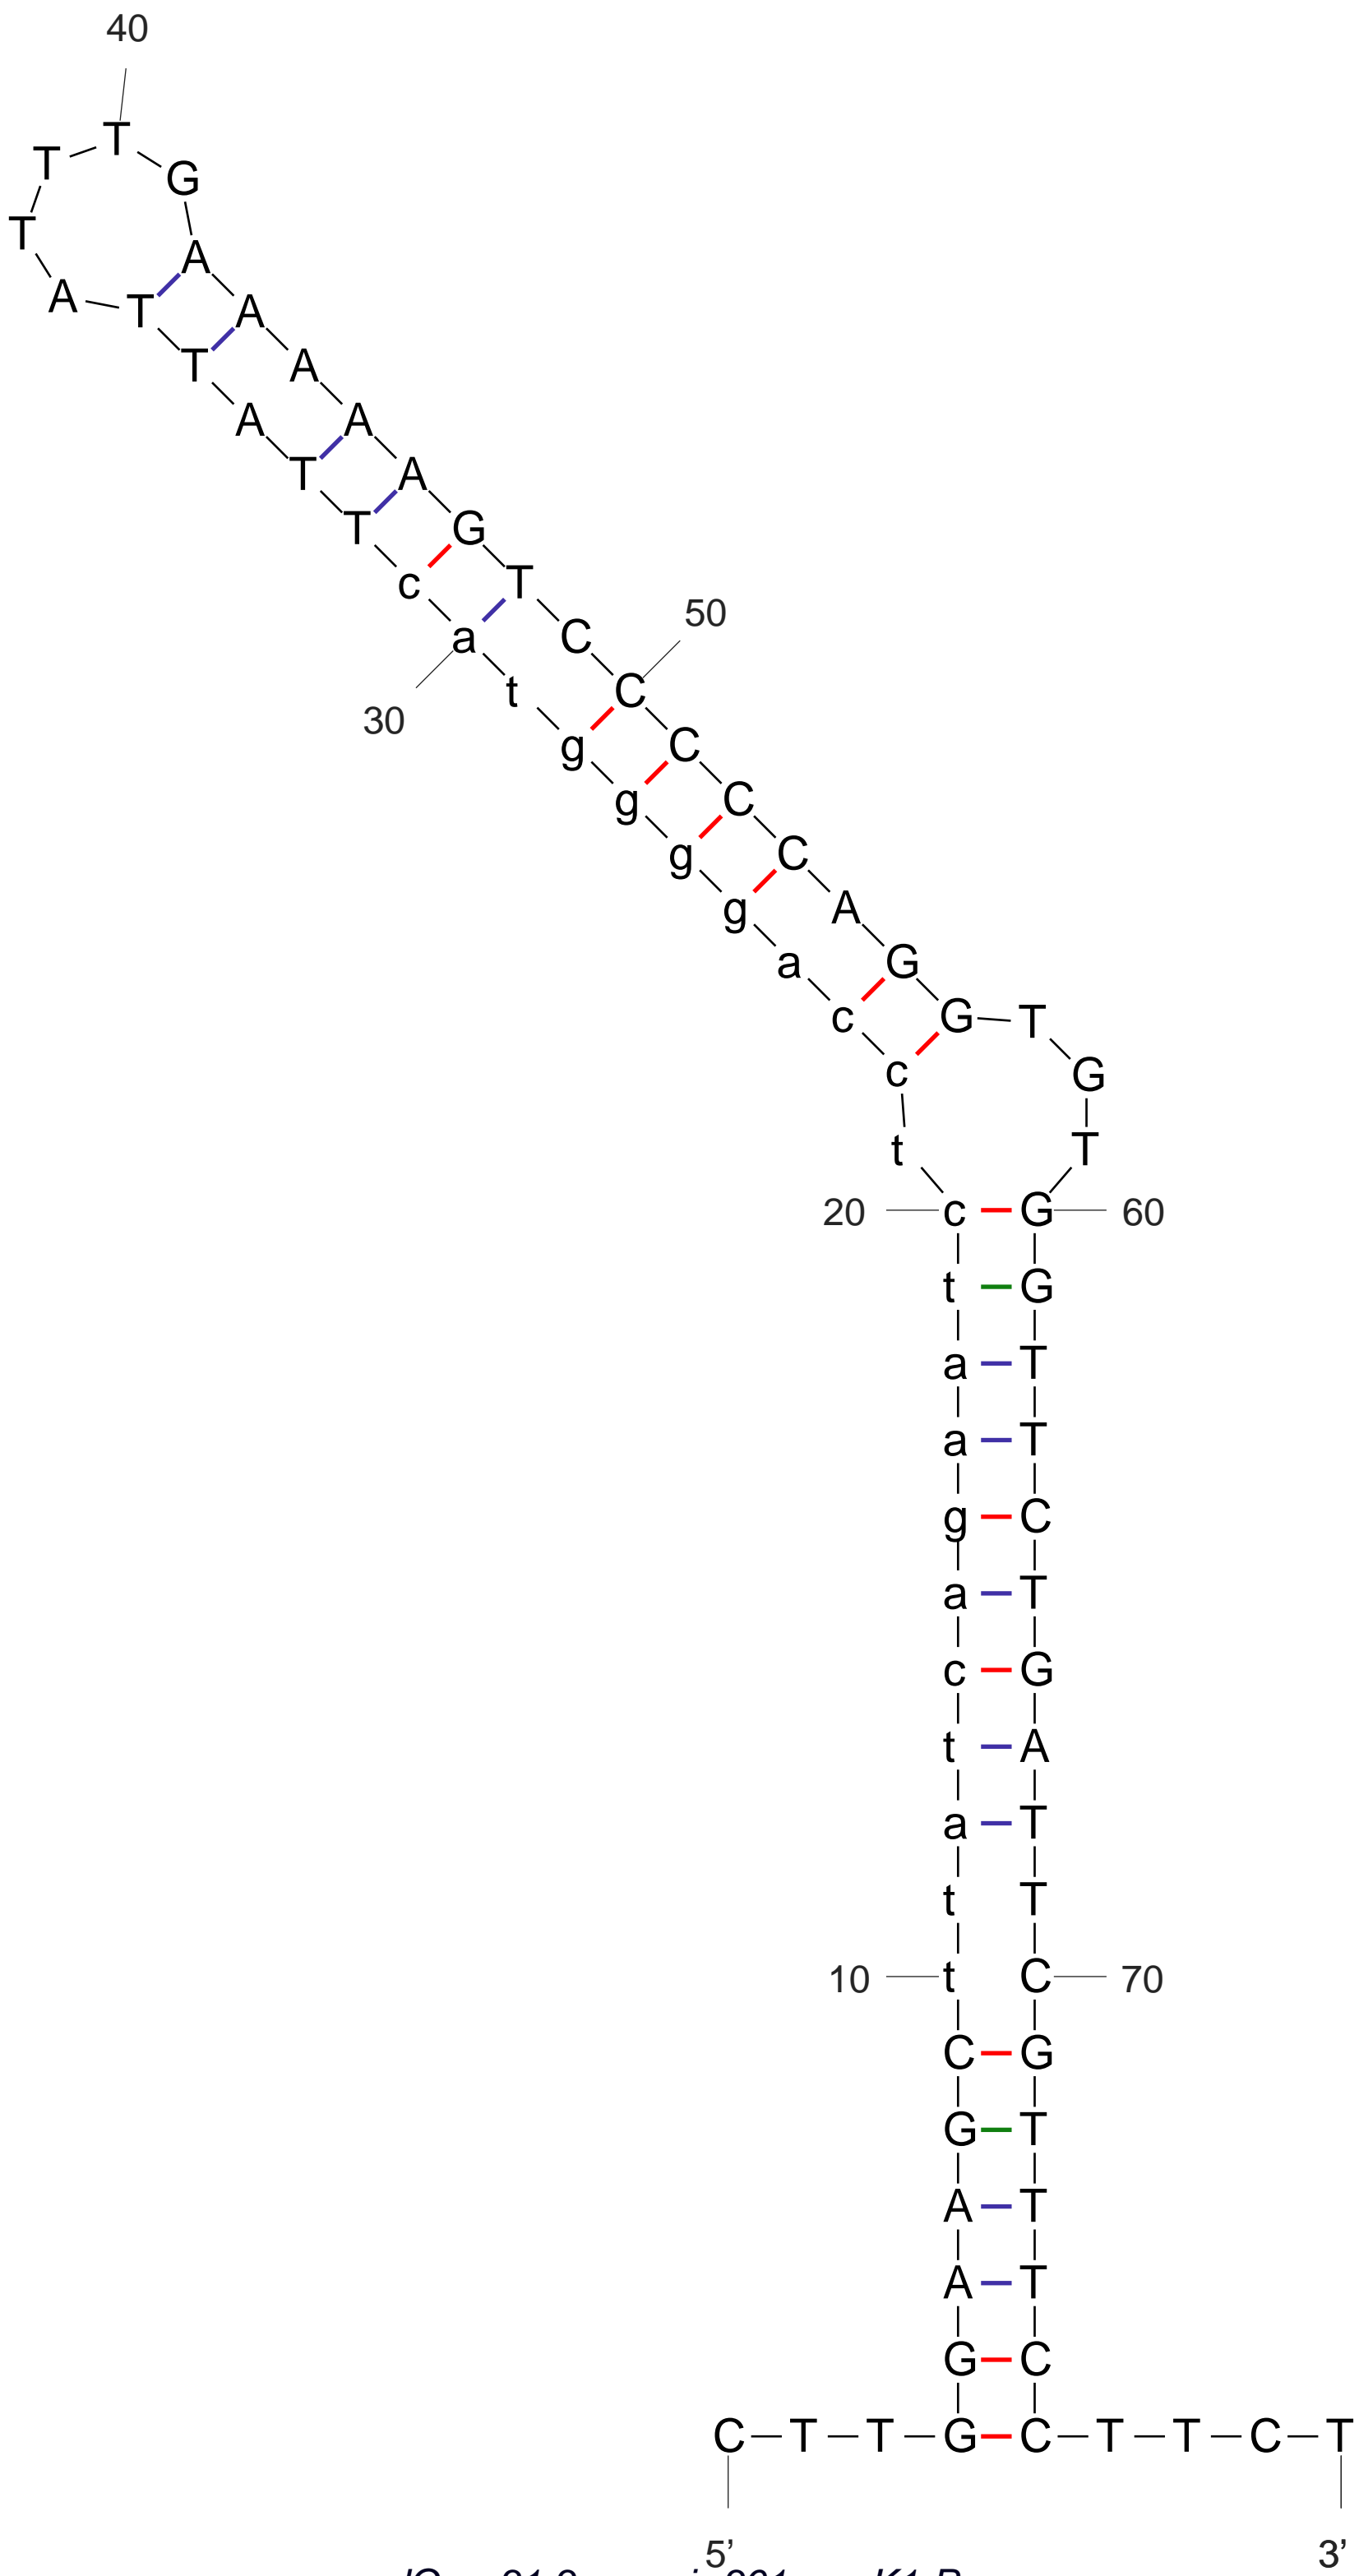

dG = -31.3 *cgr-mir-361\_ss\_K1-P*



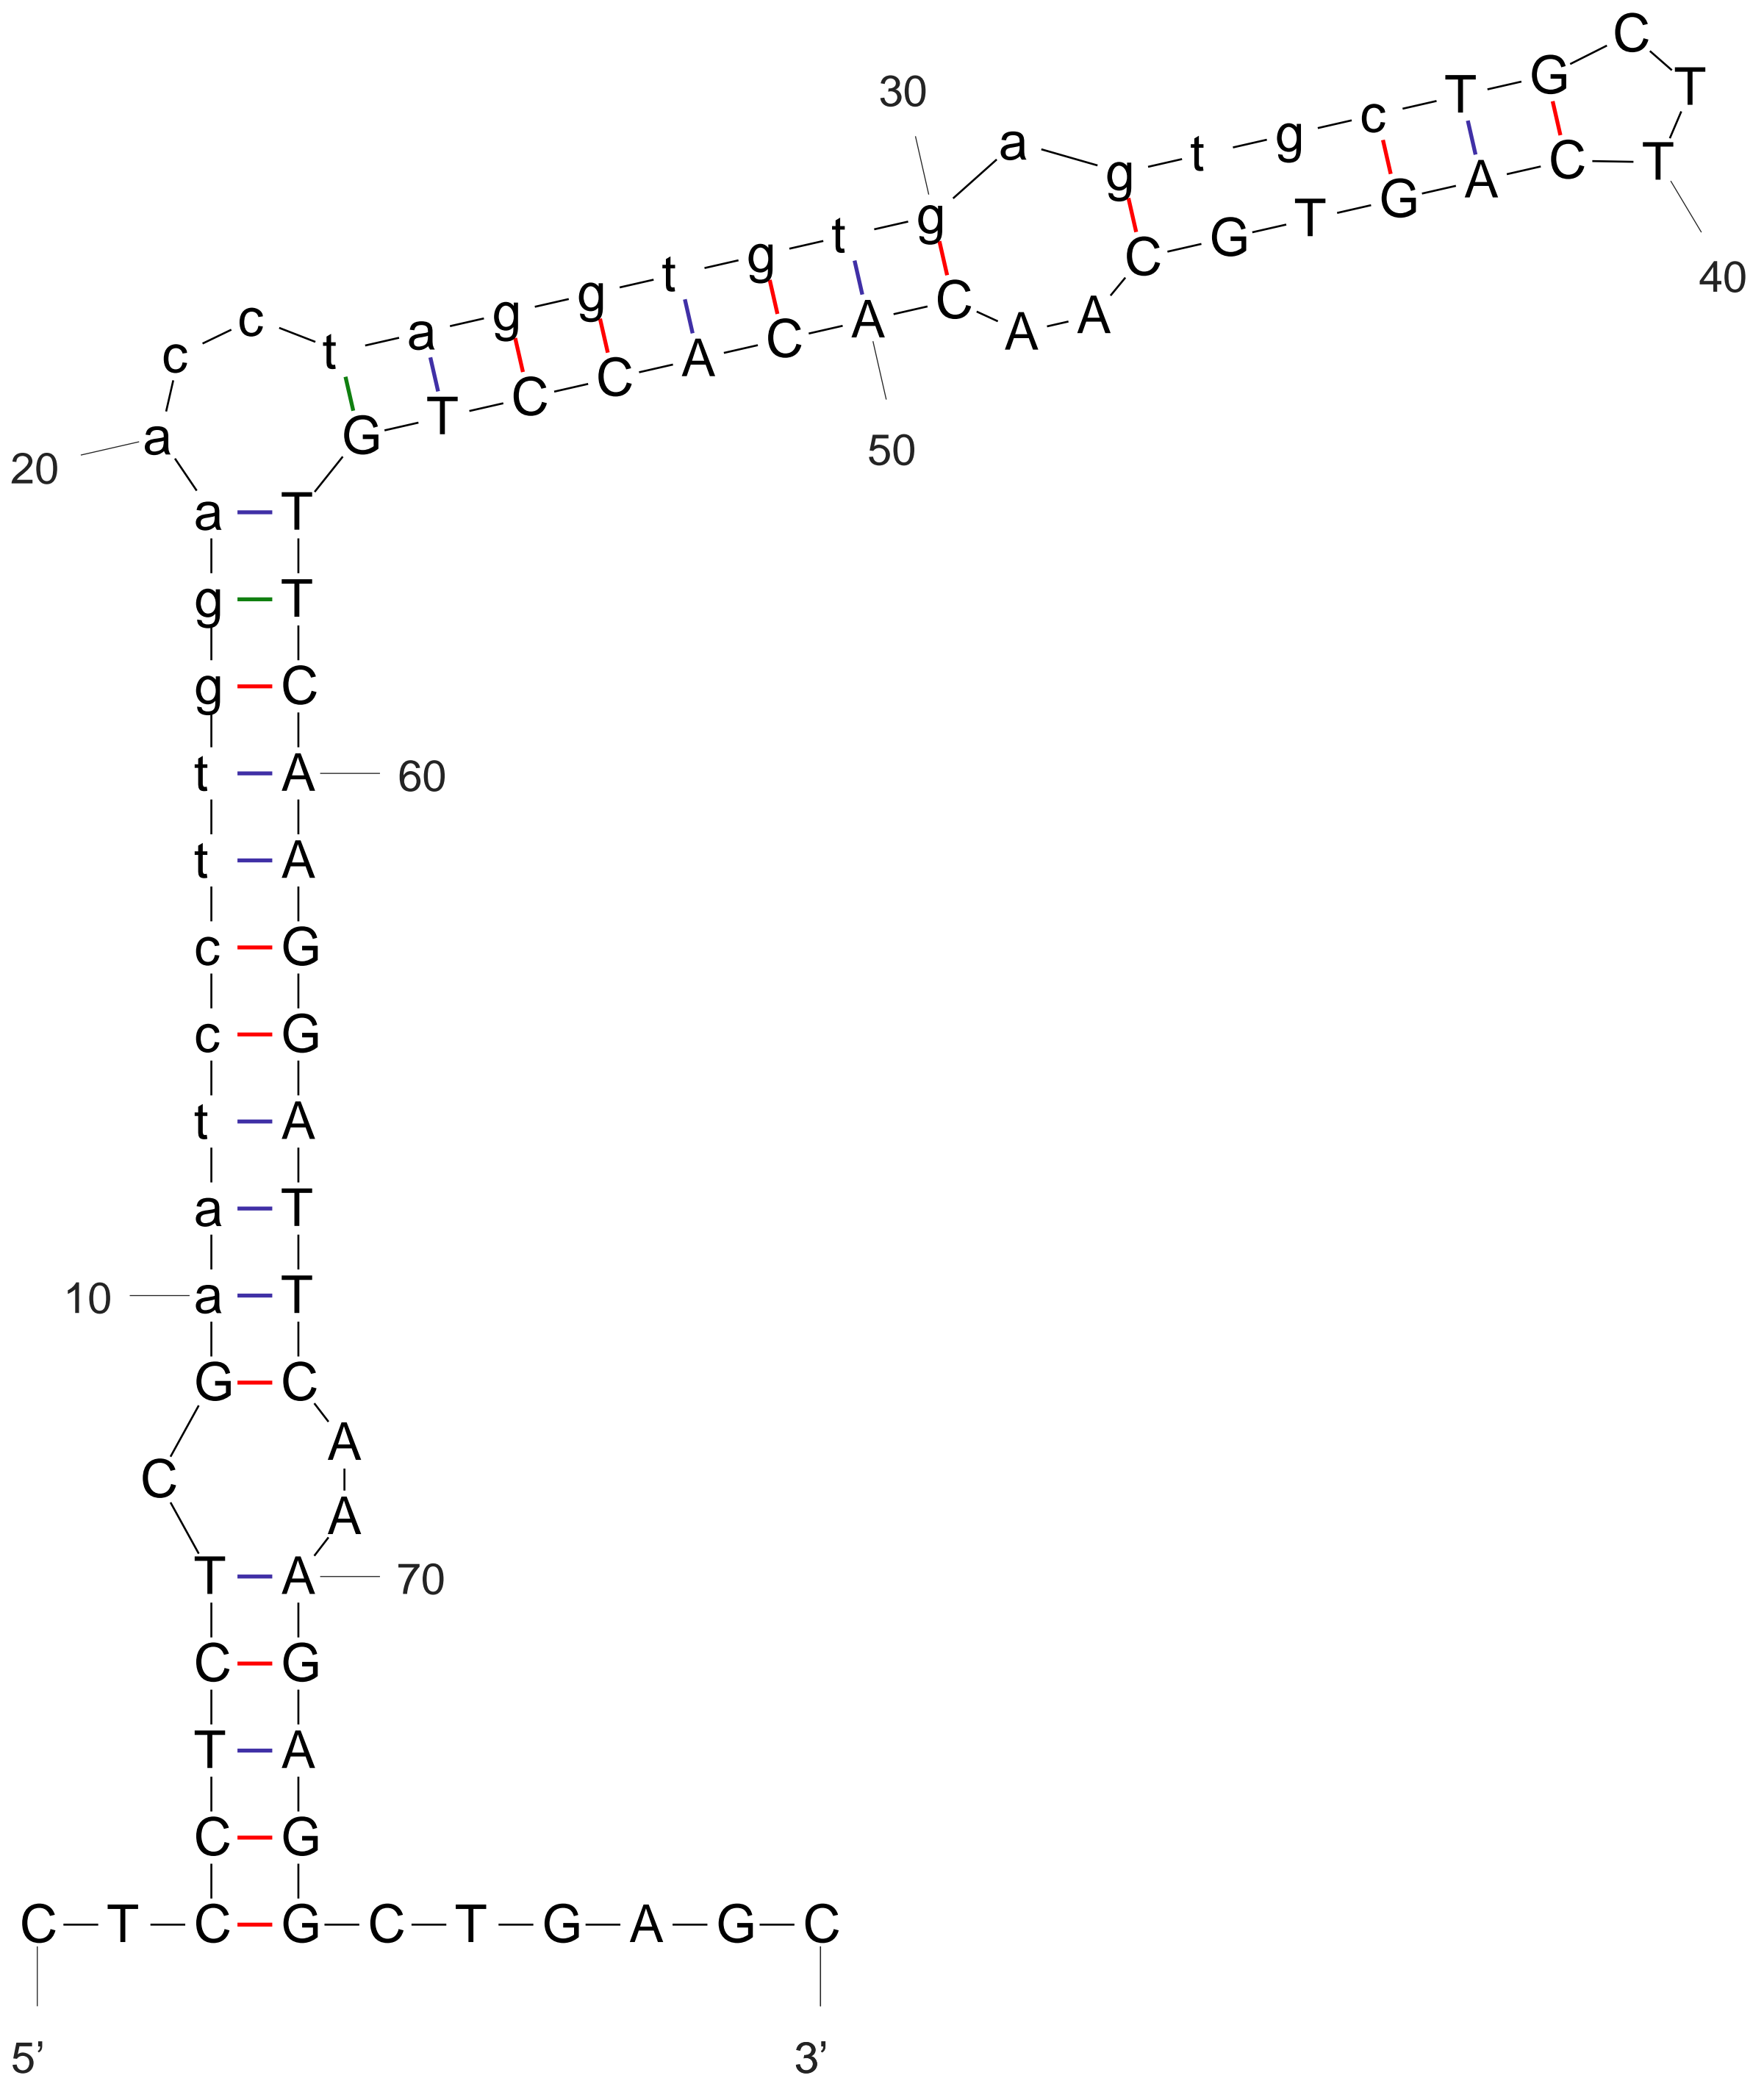

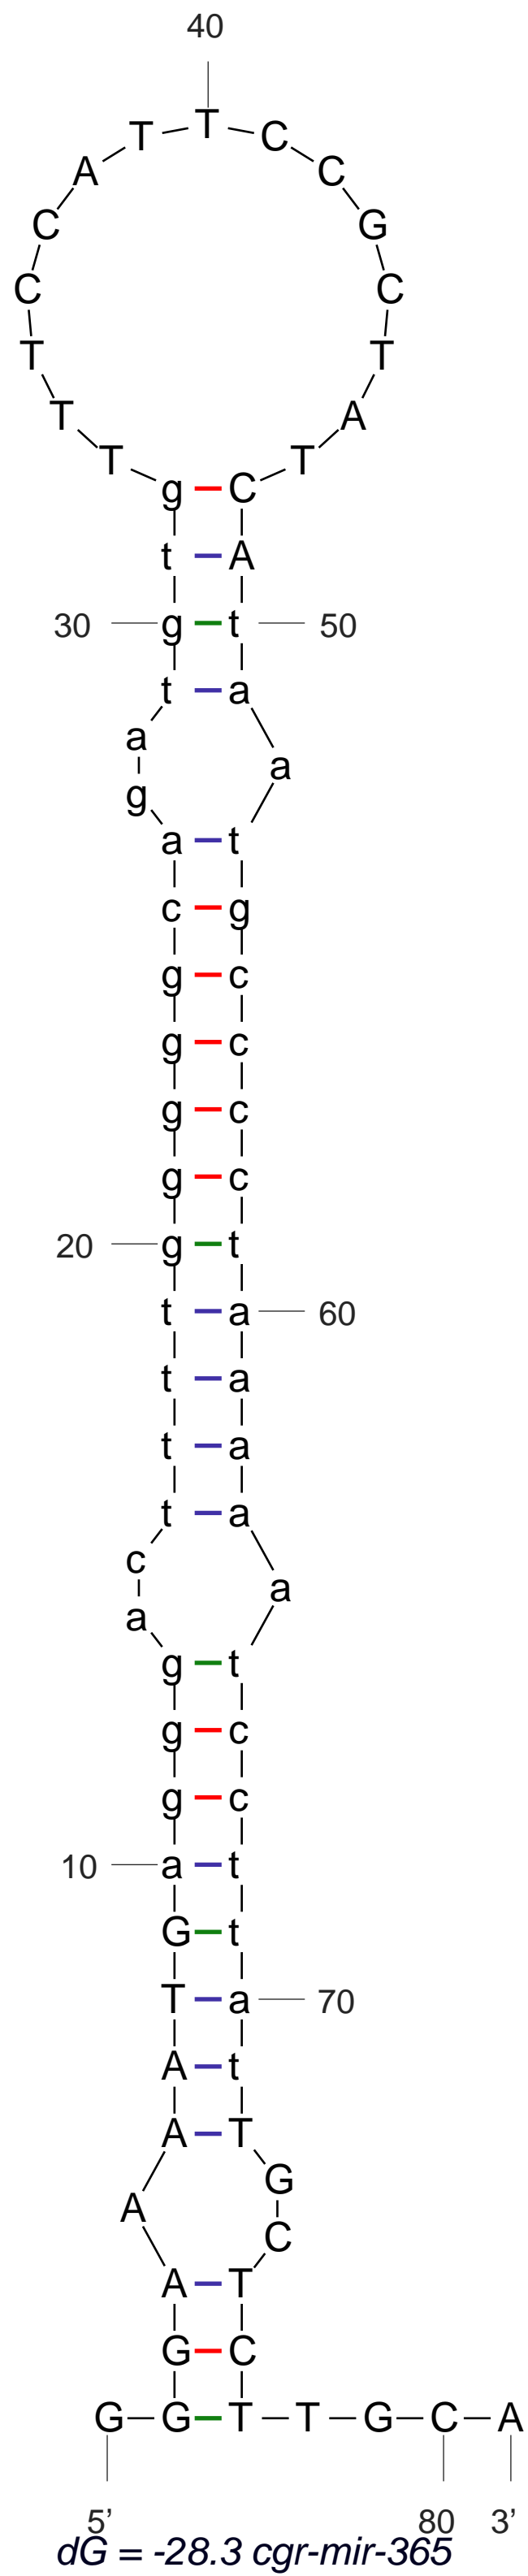

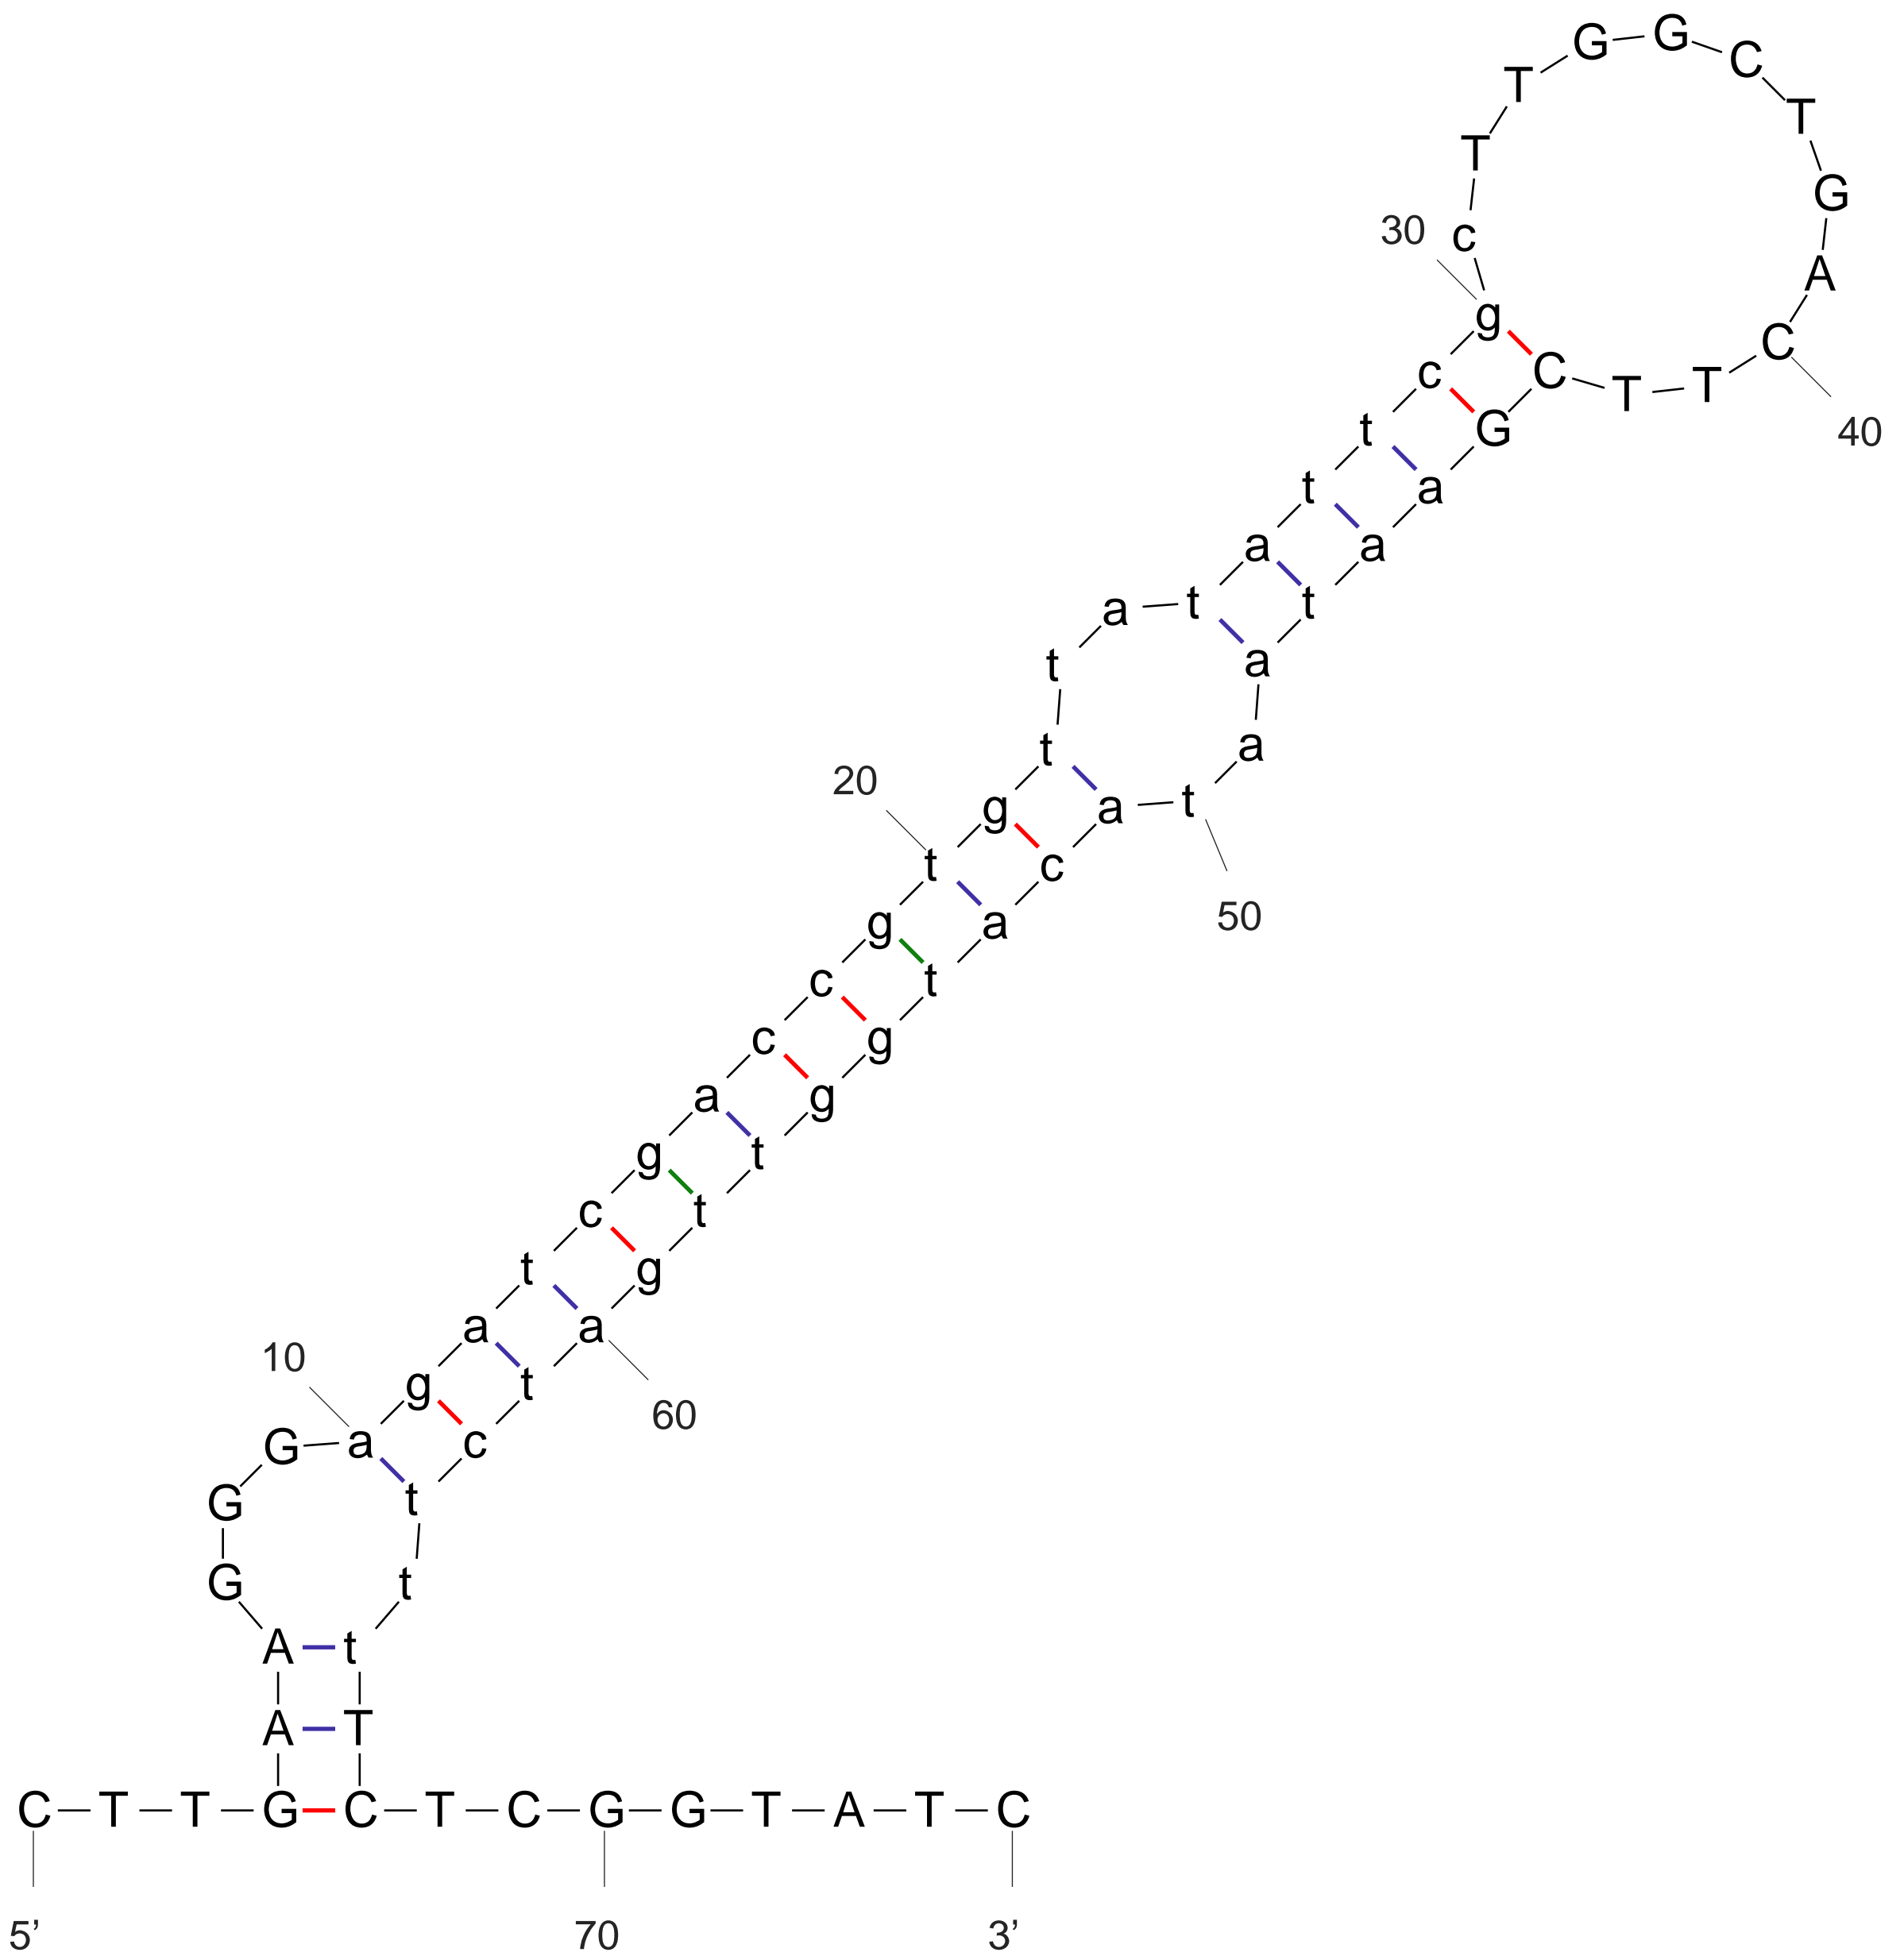

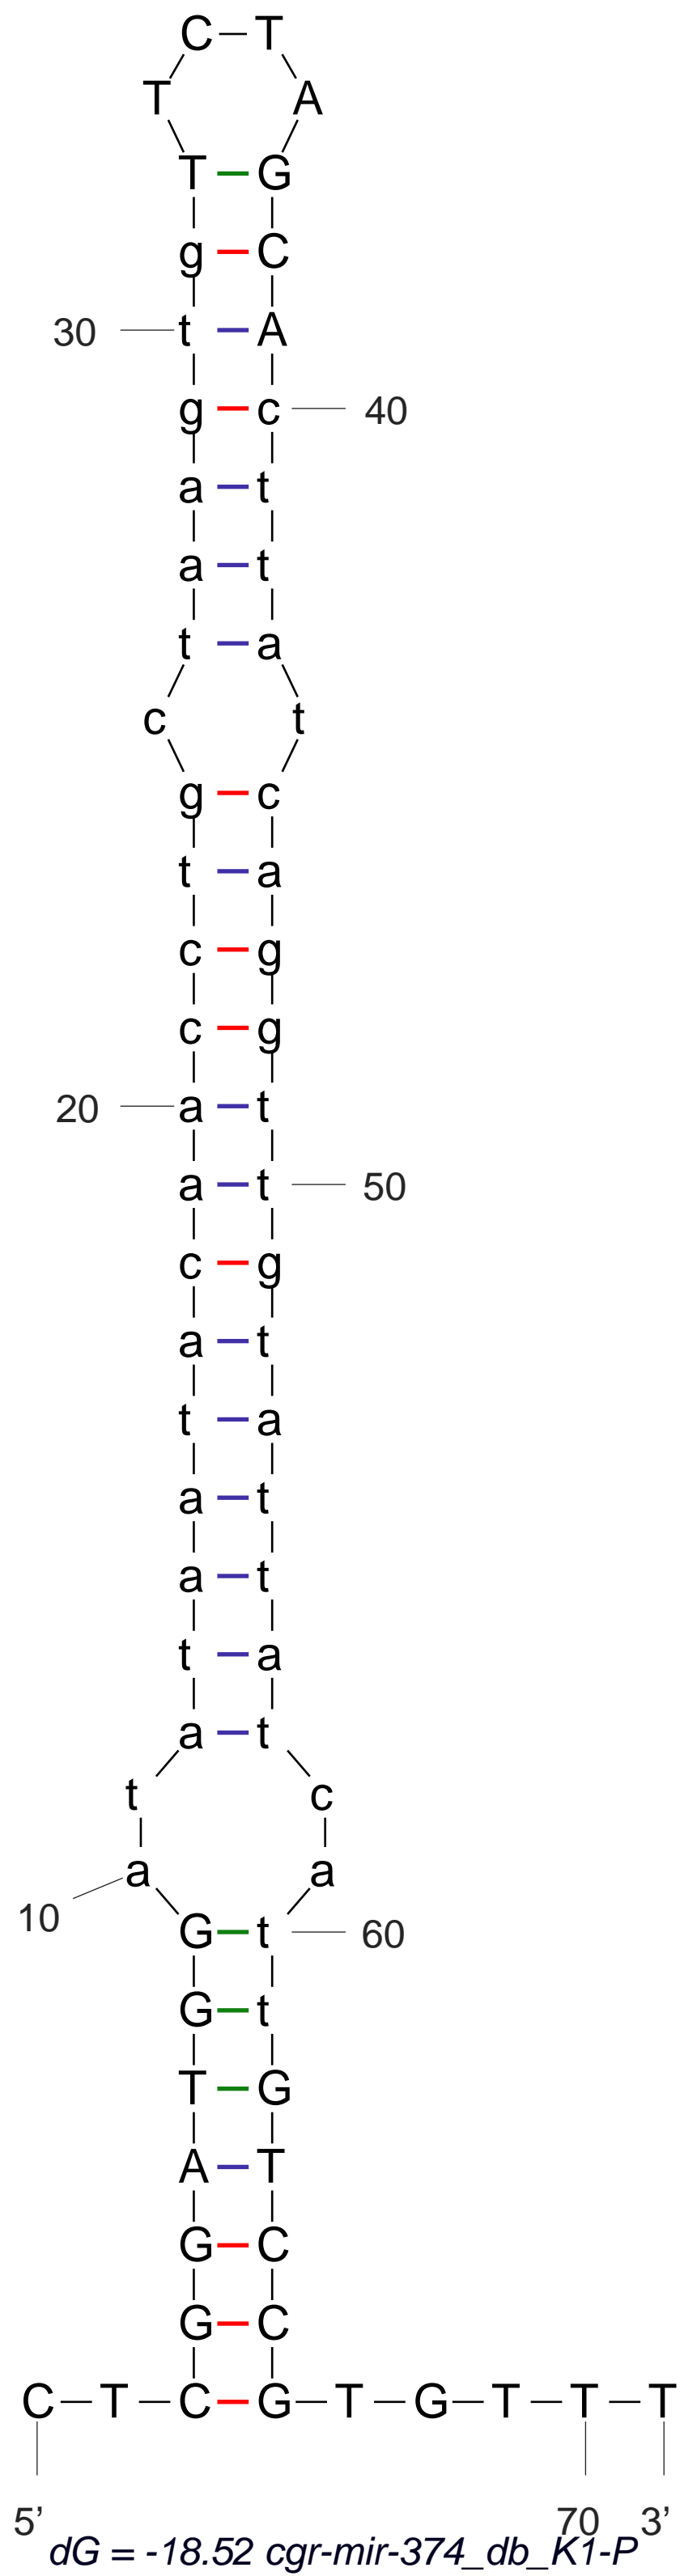

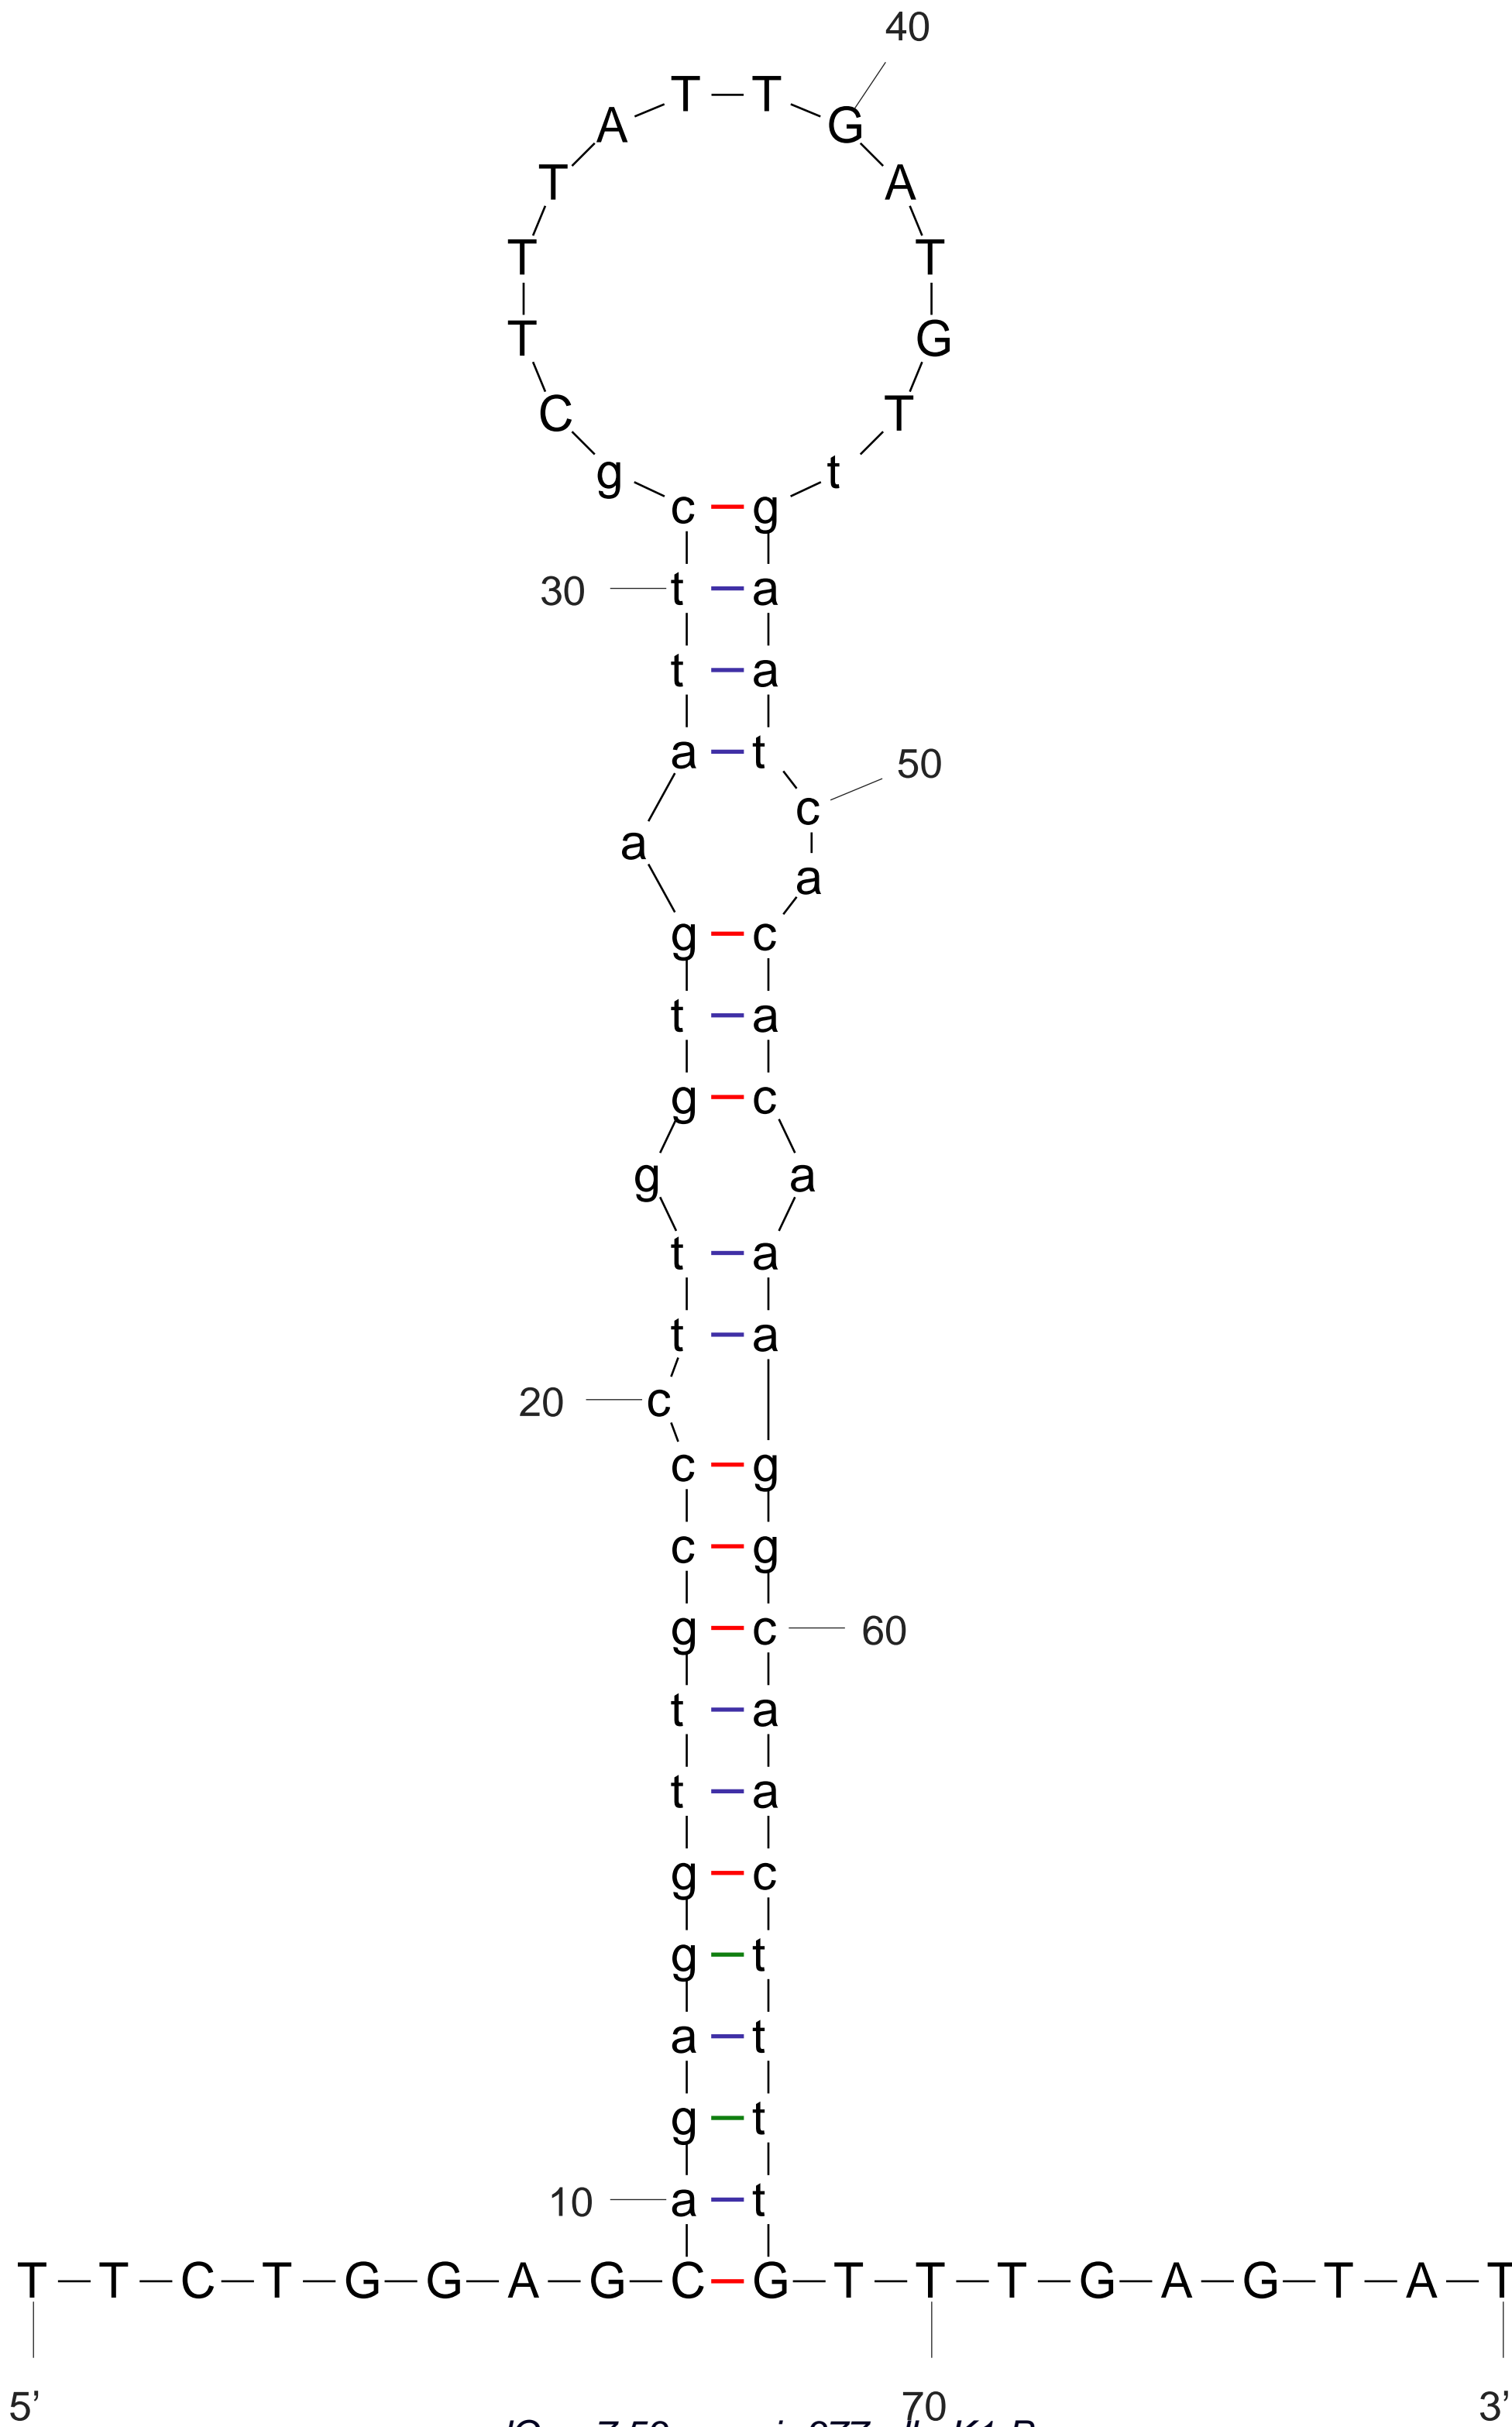

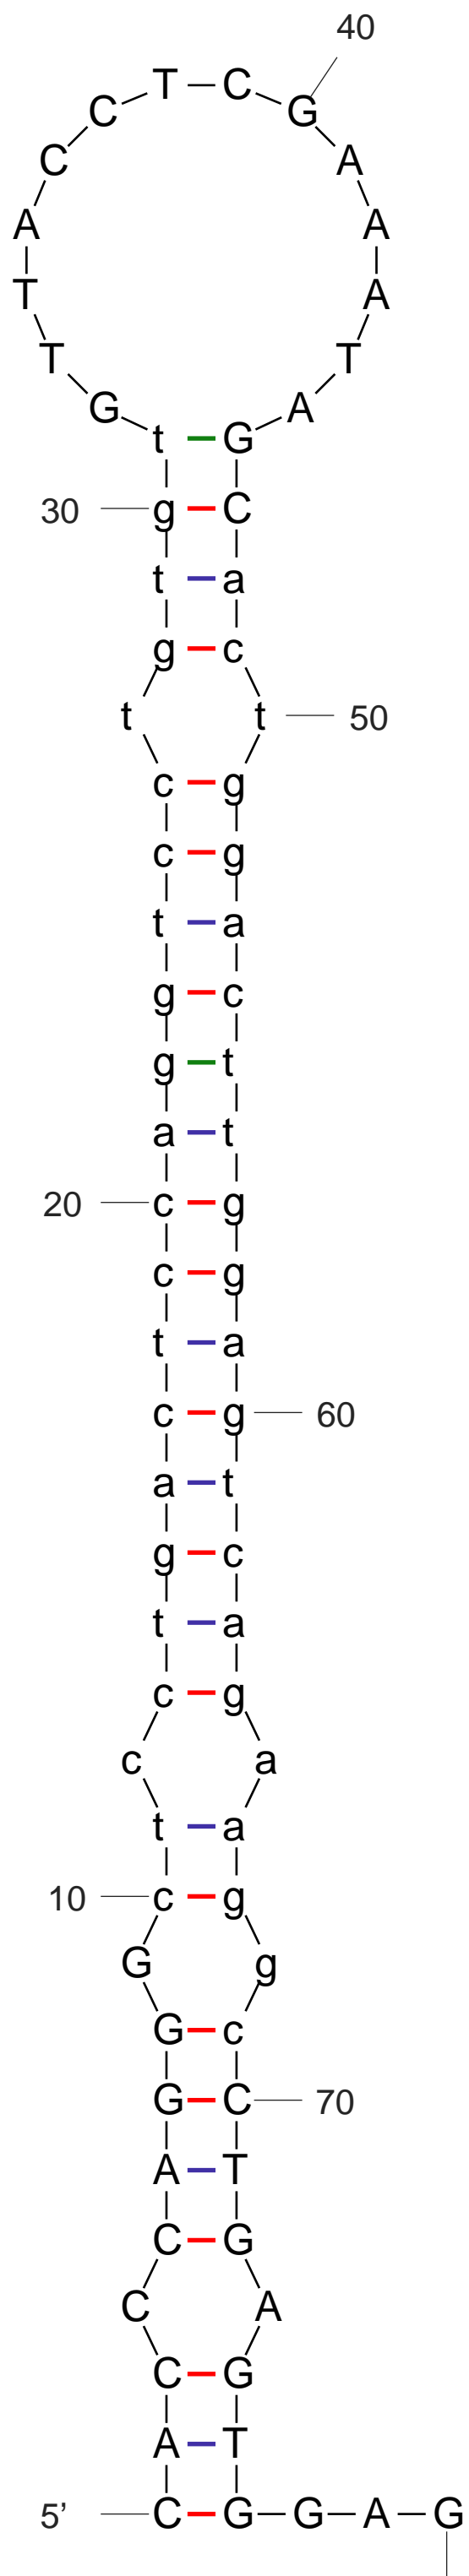

dG = -22.81 *cgr-mir-378\_db\_K1-P*

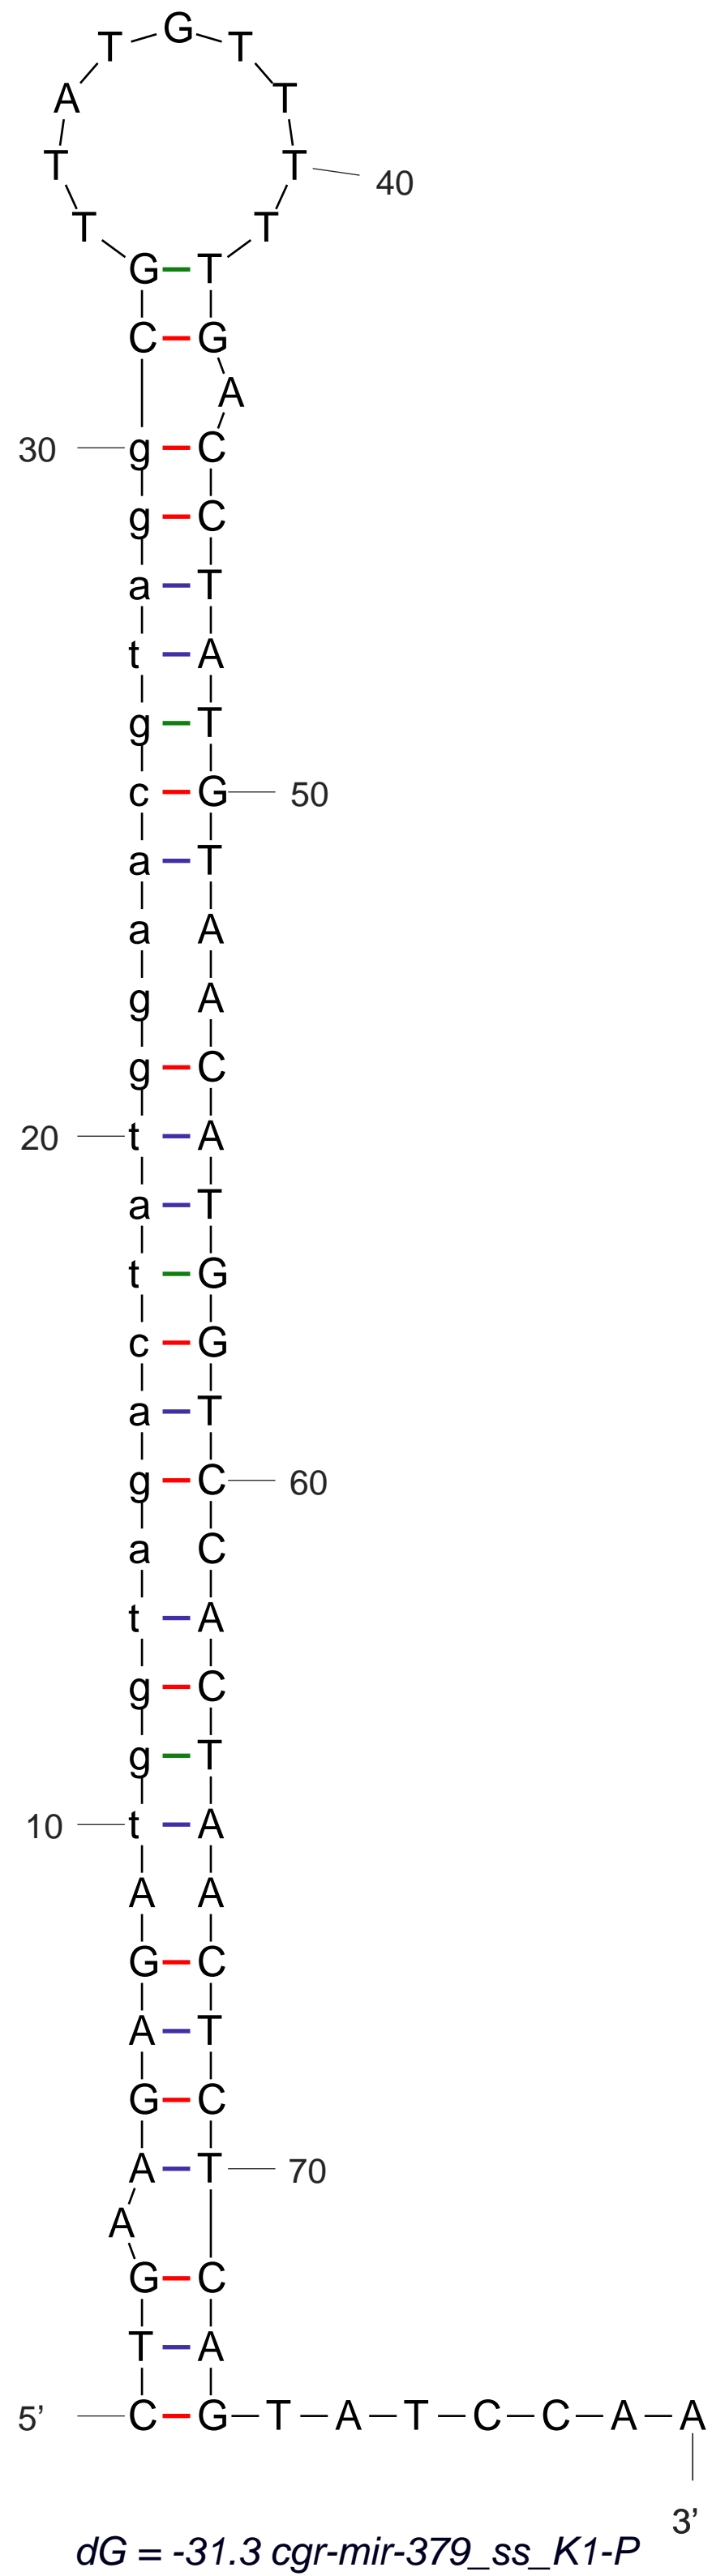





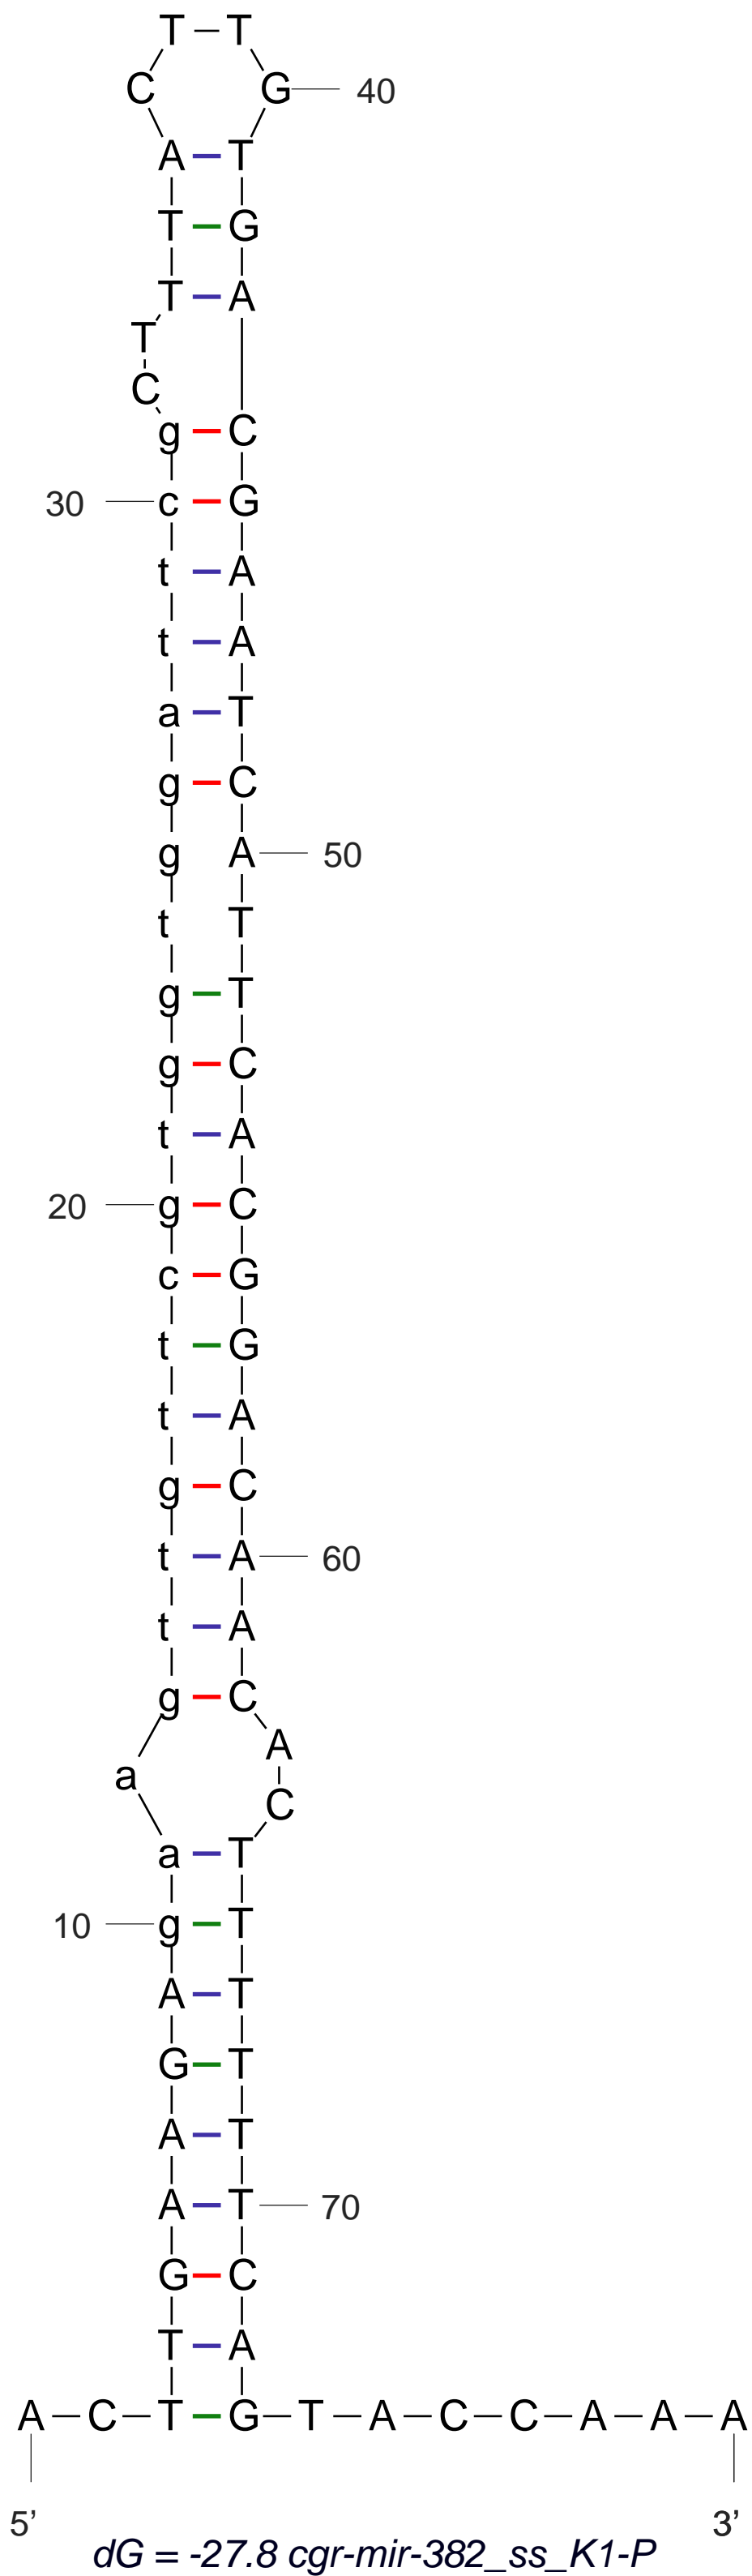

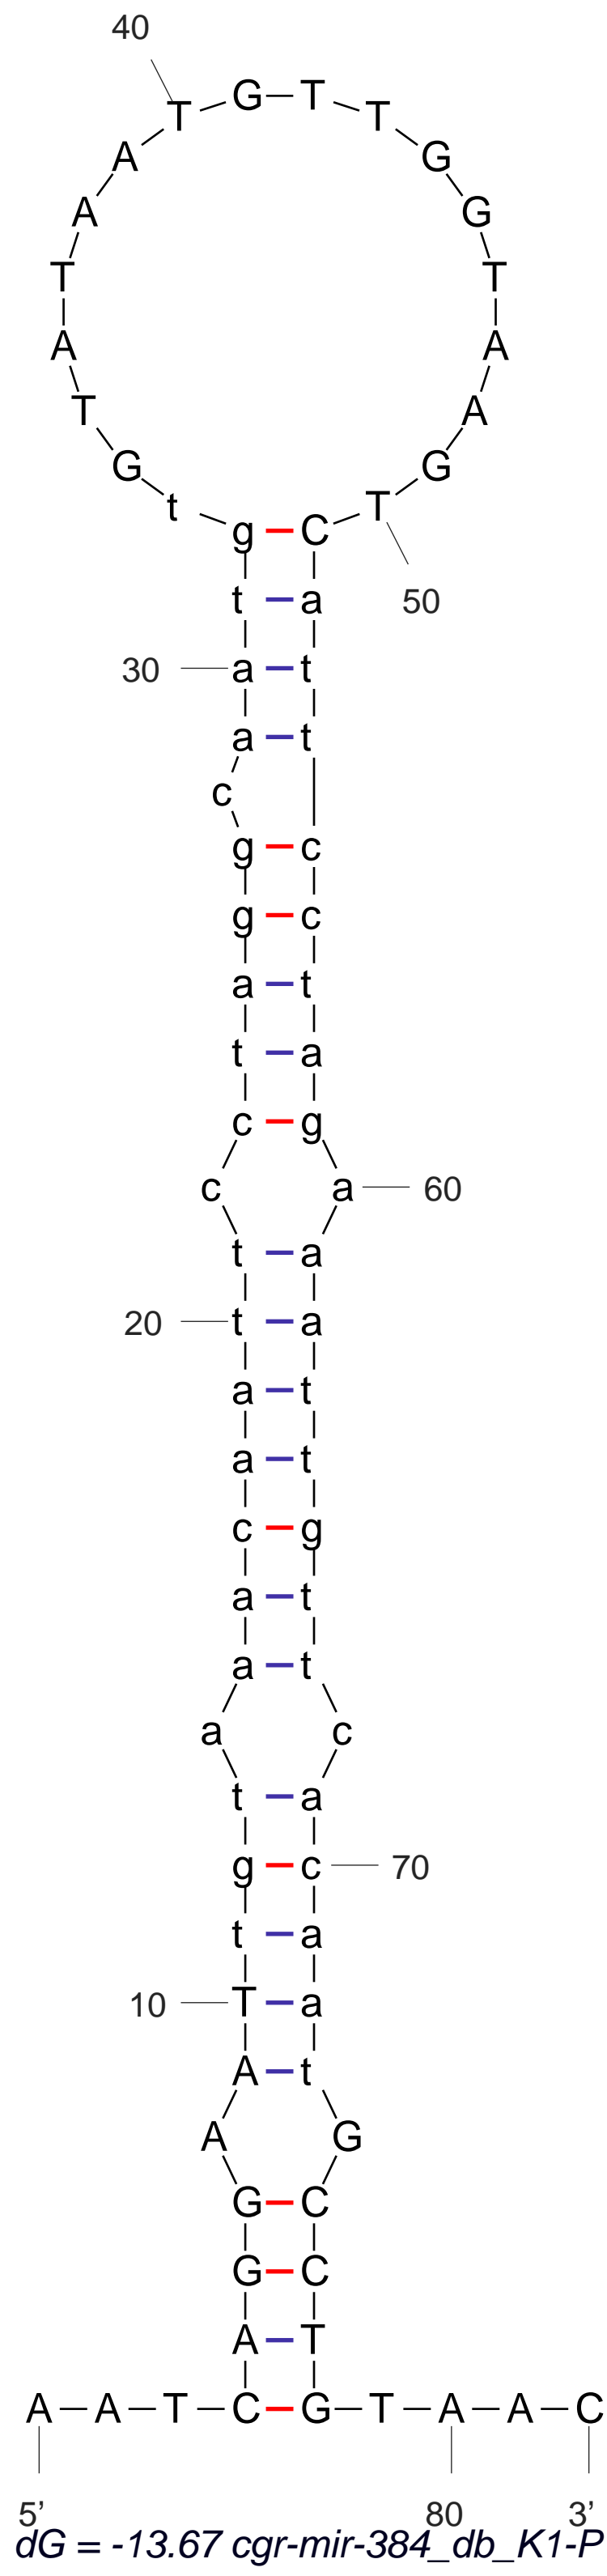

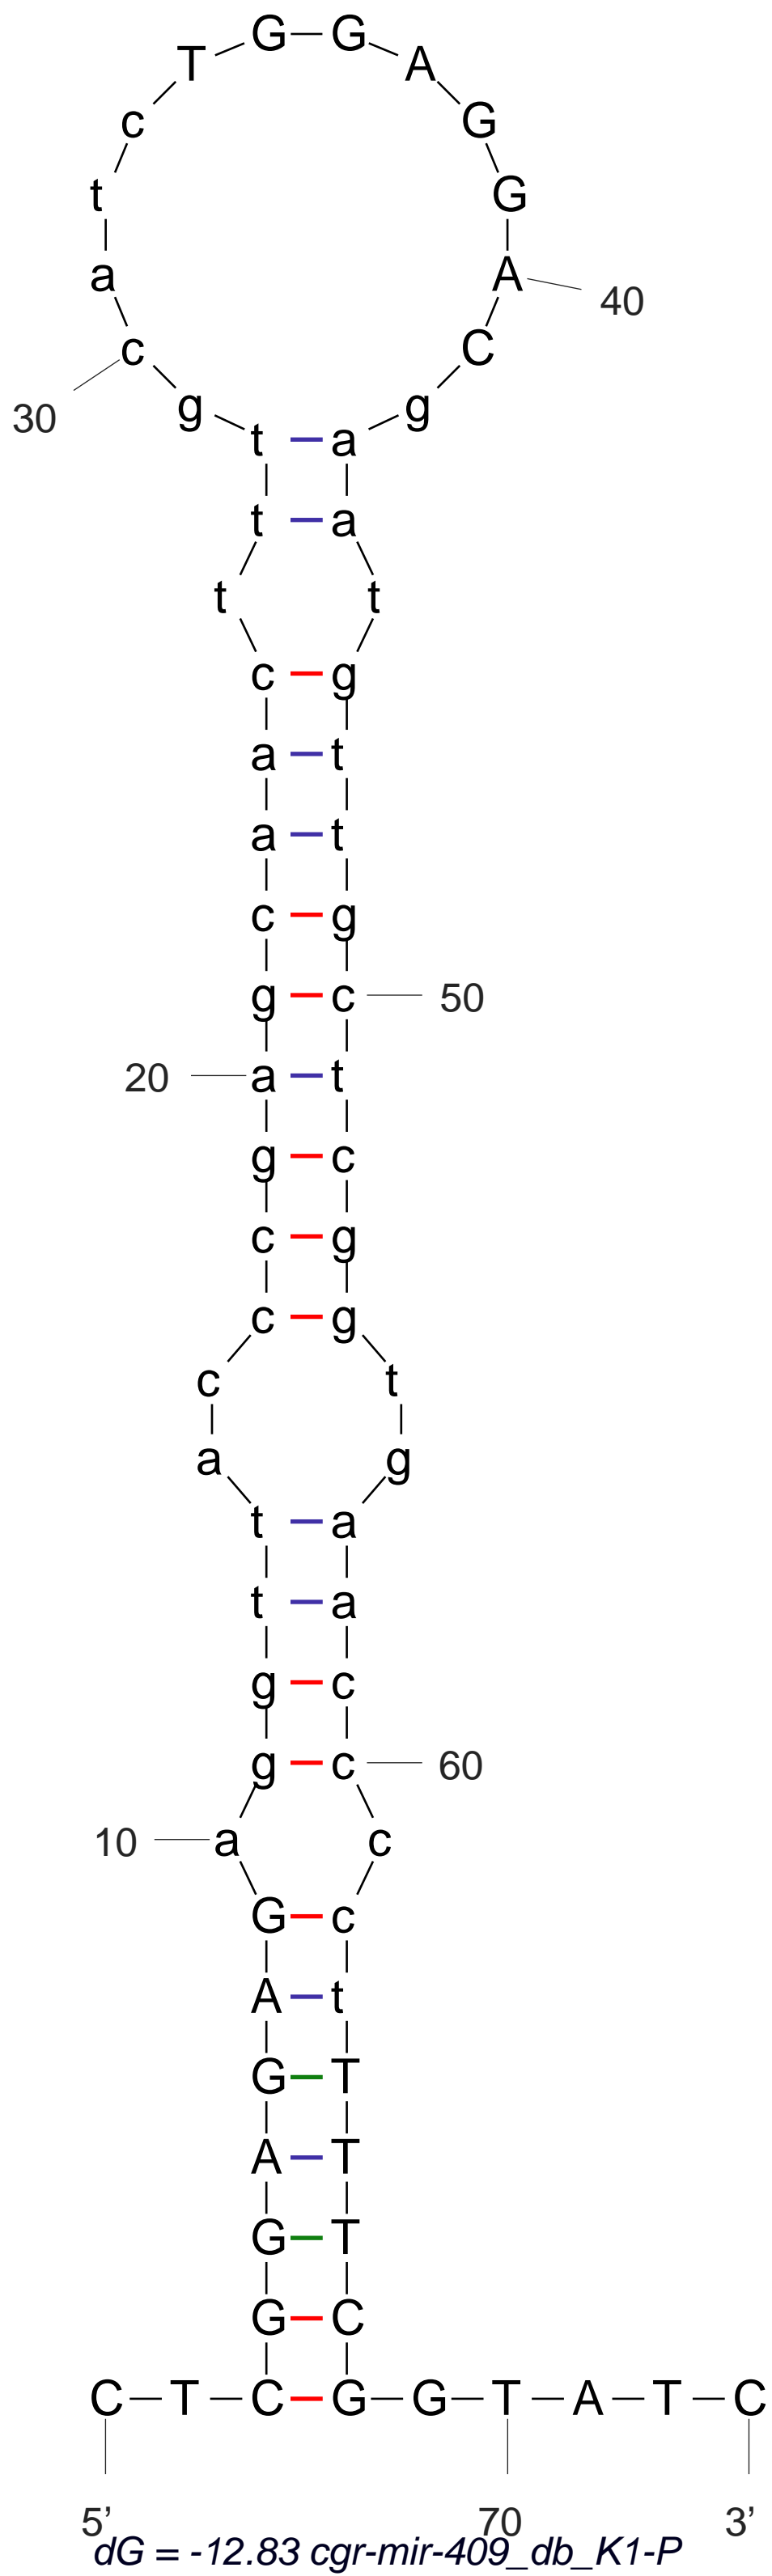

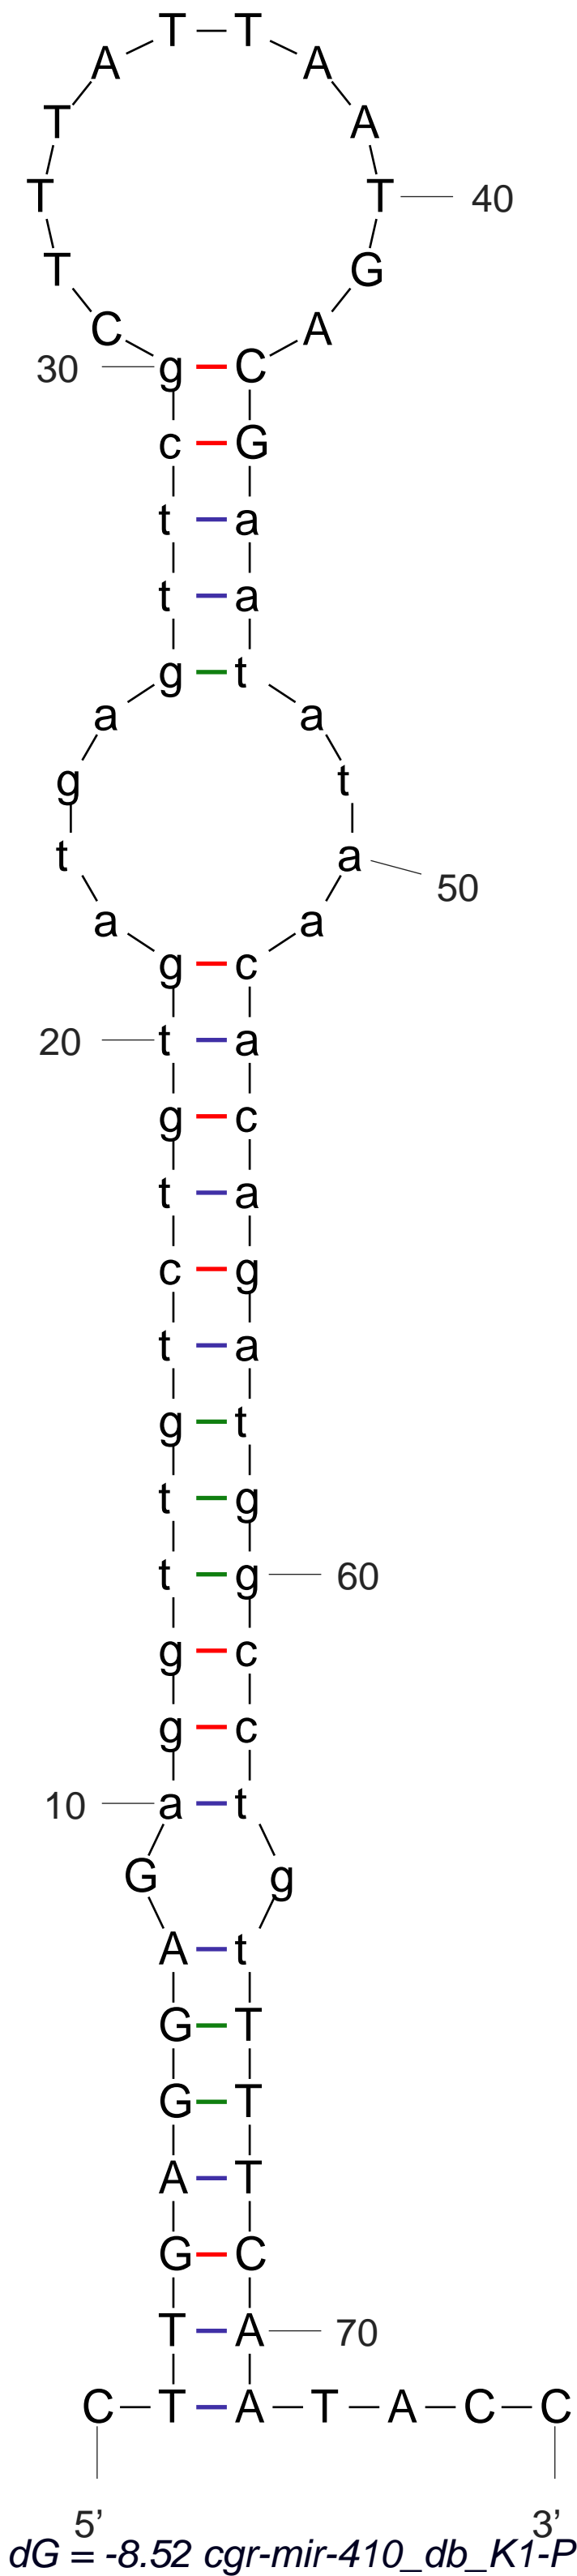

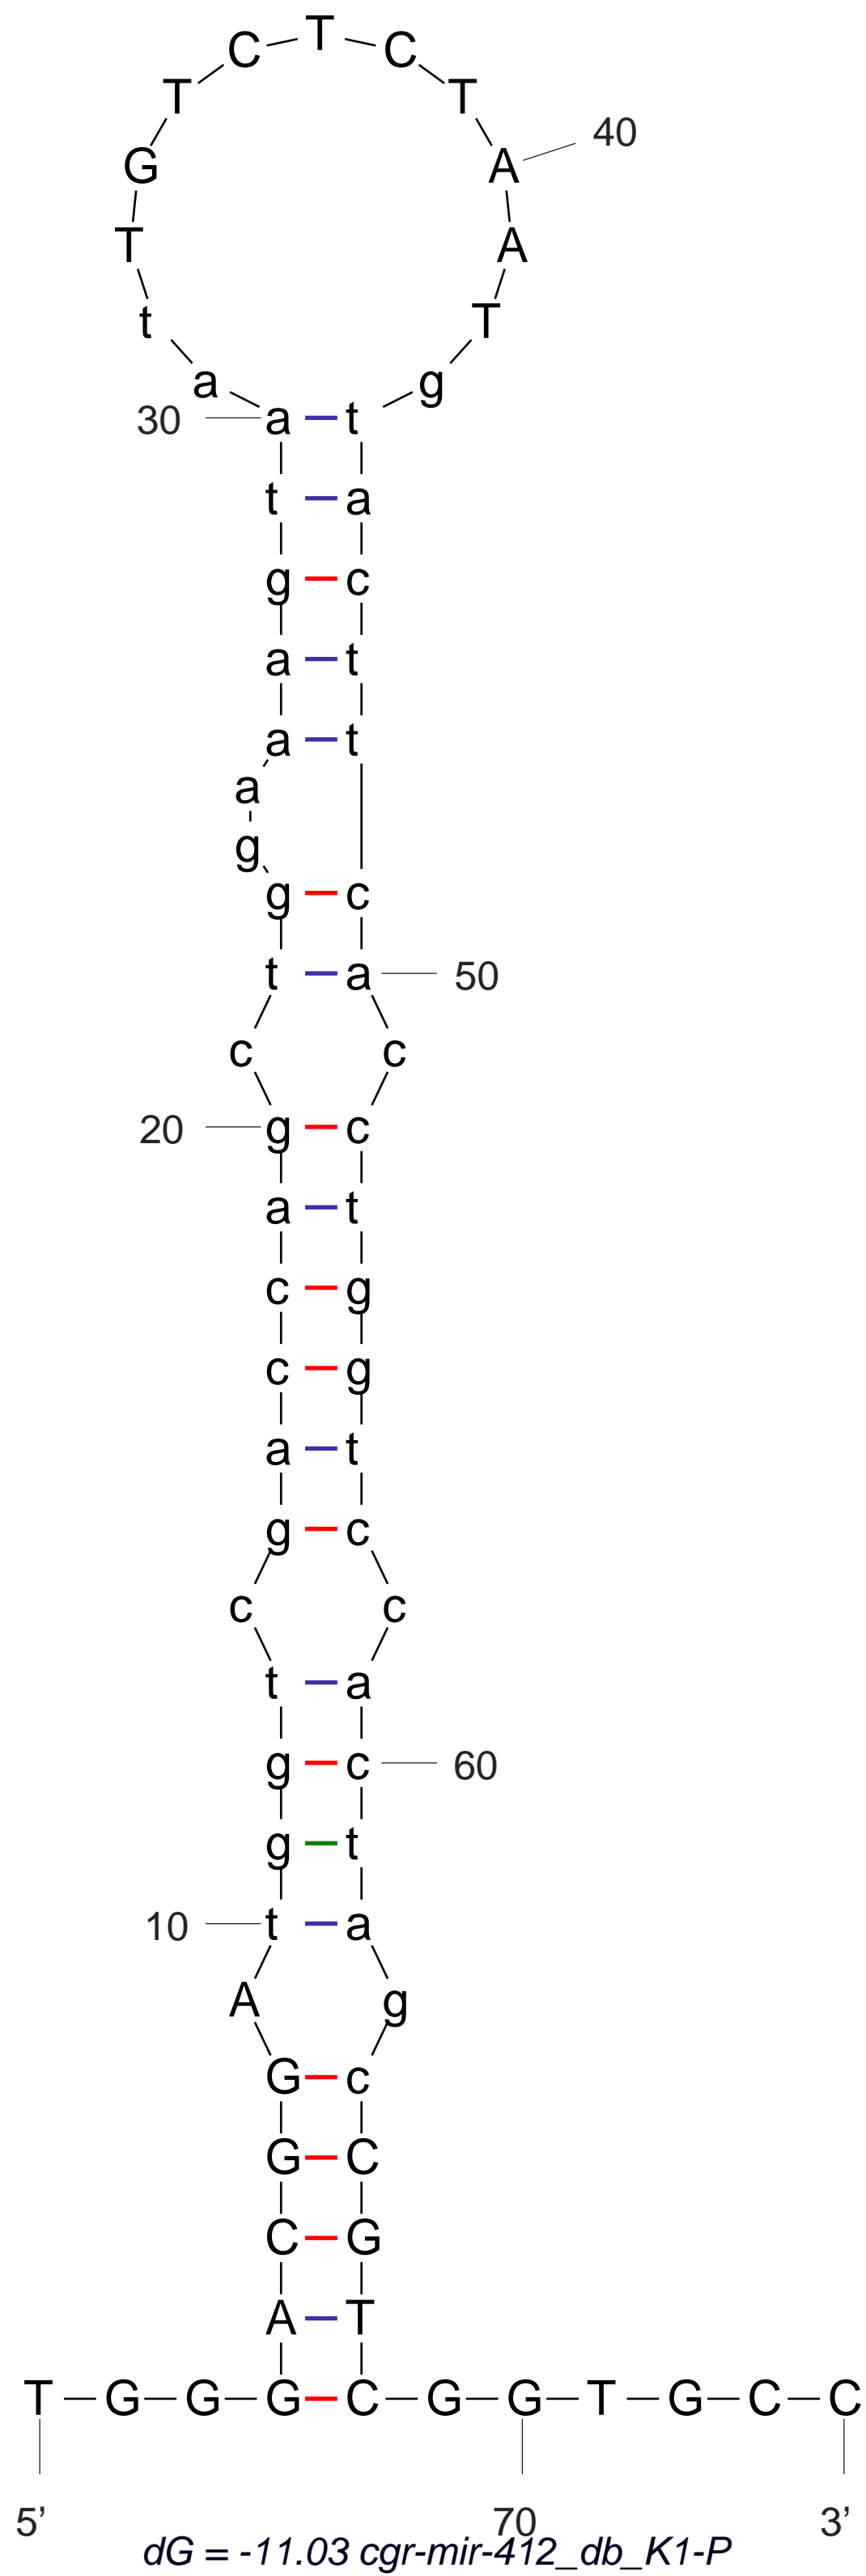

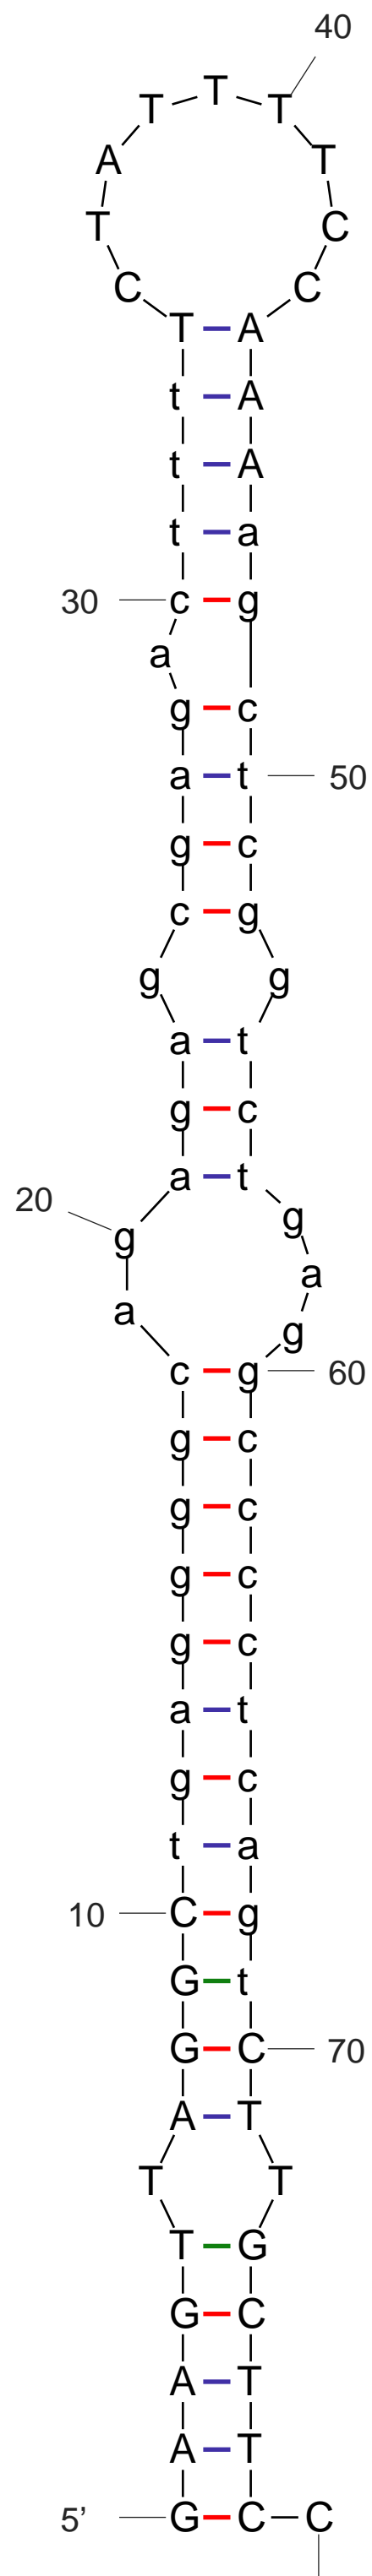

$dG = -21.77$  *cgr-mir-423\_db\_K1-P*

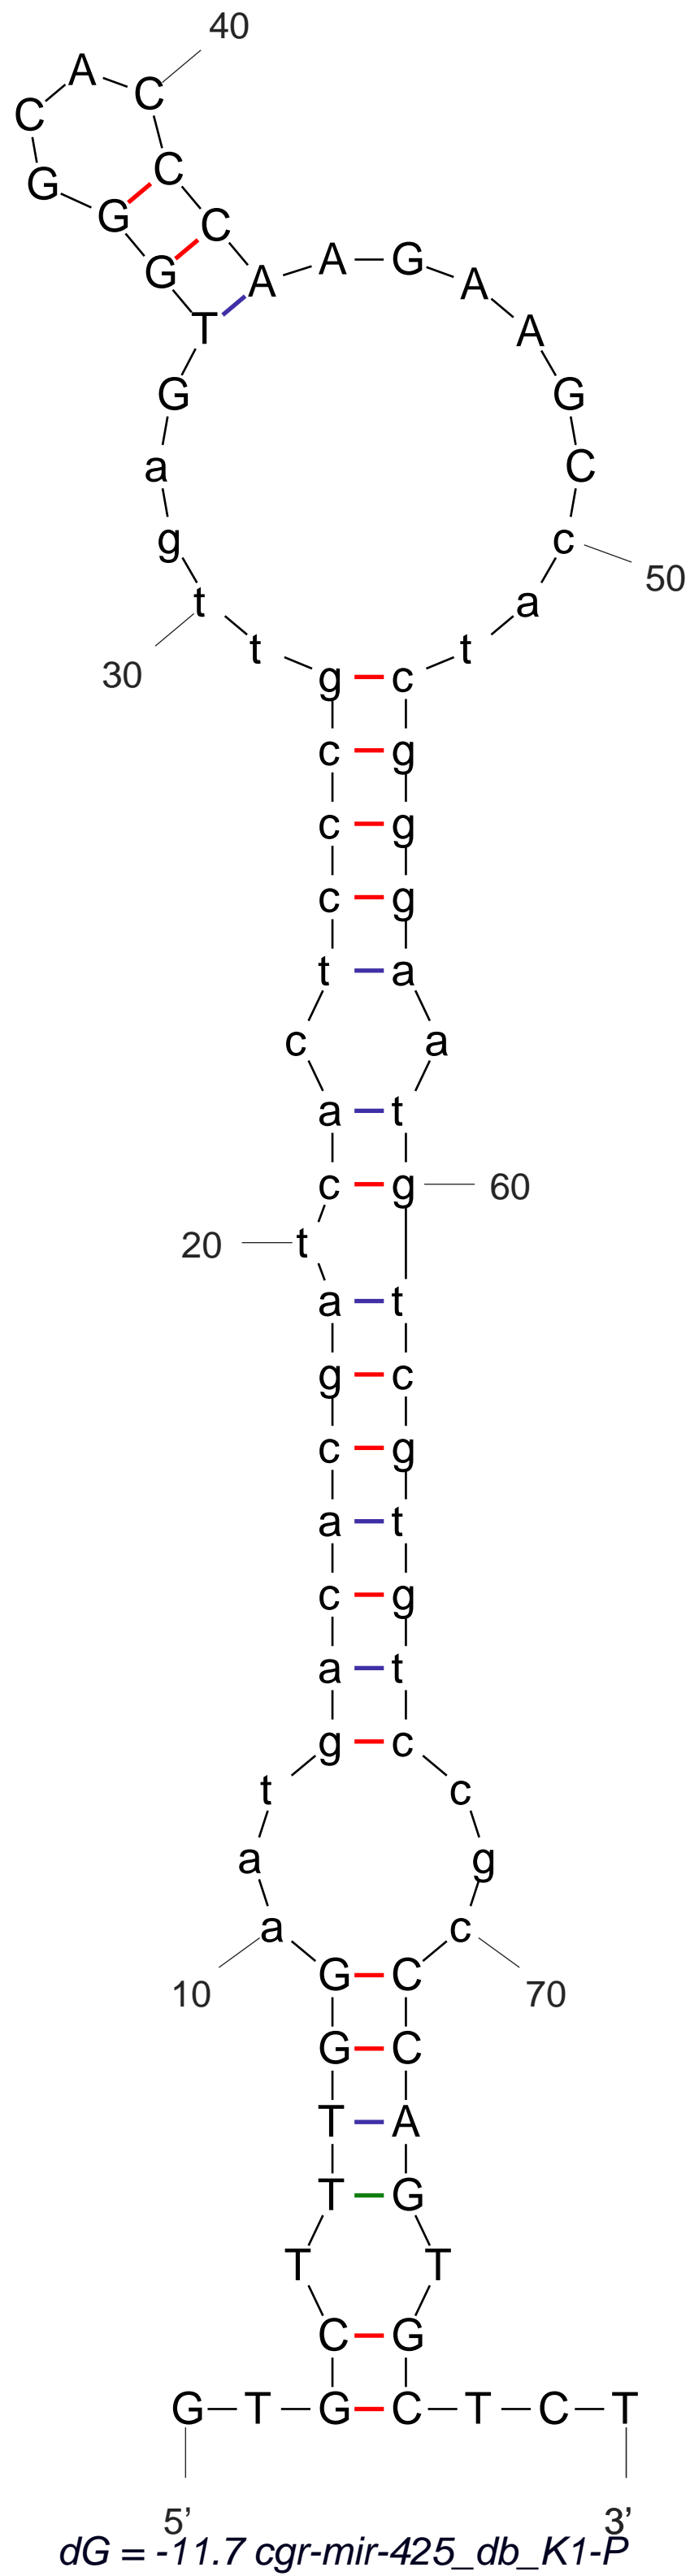

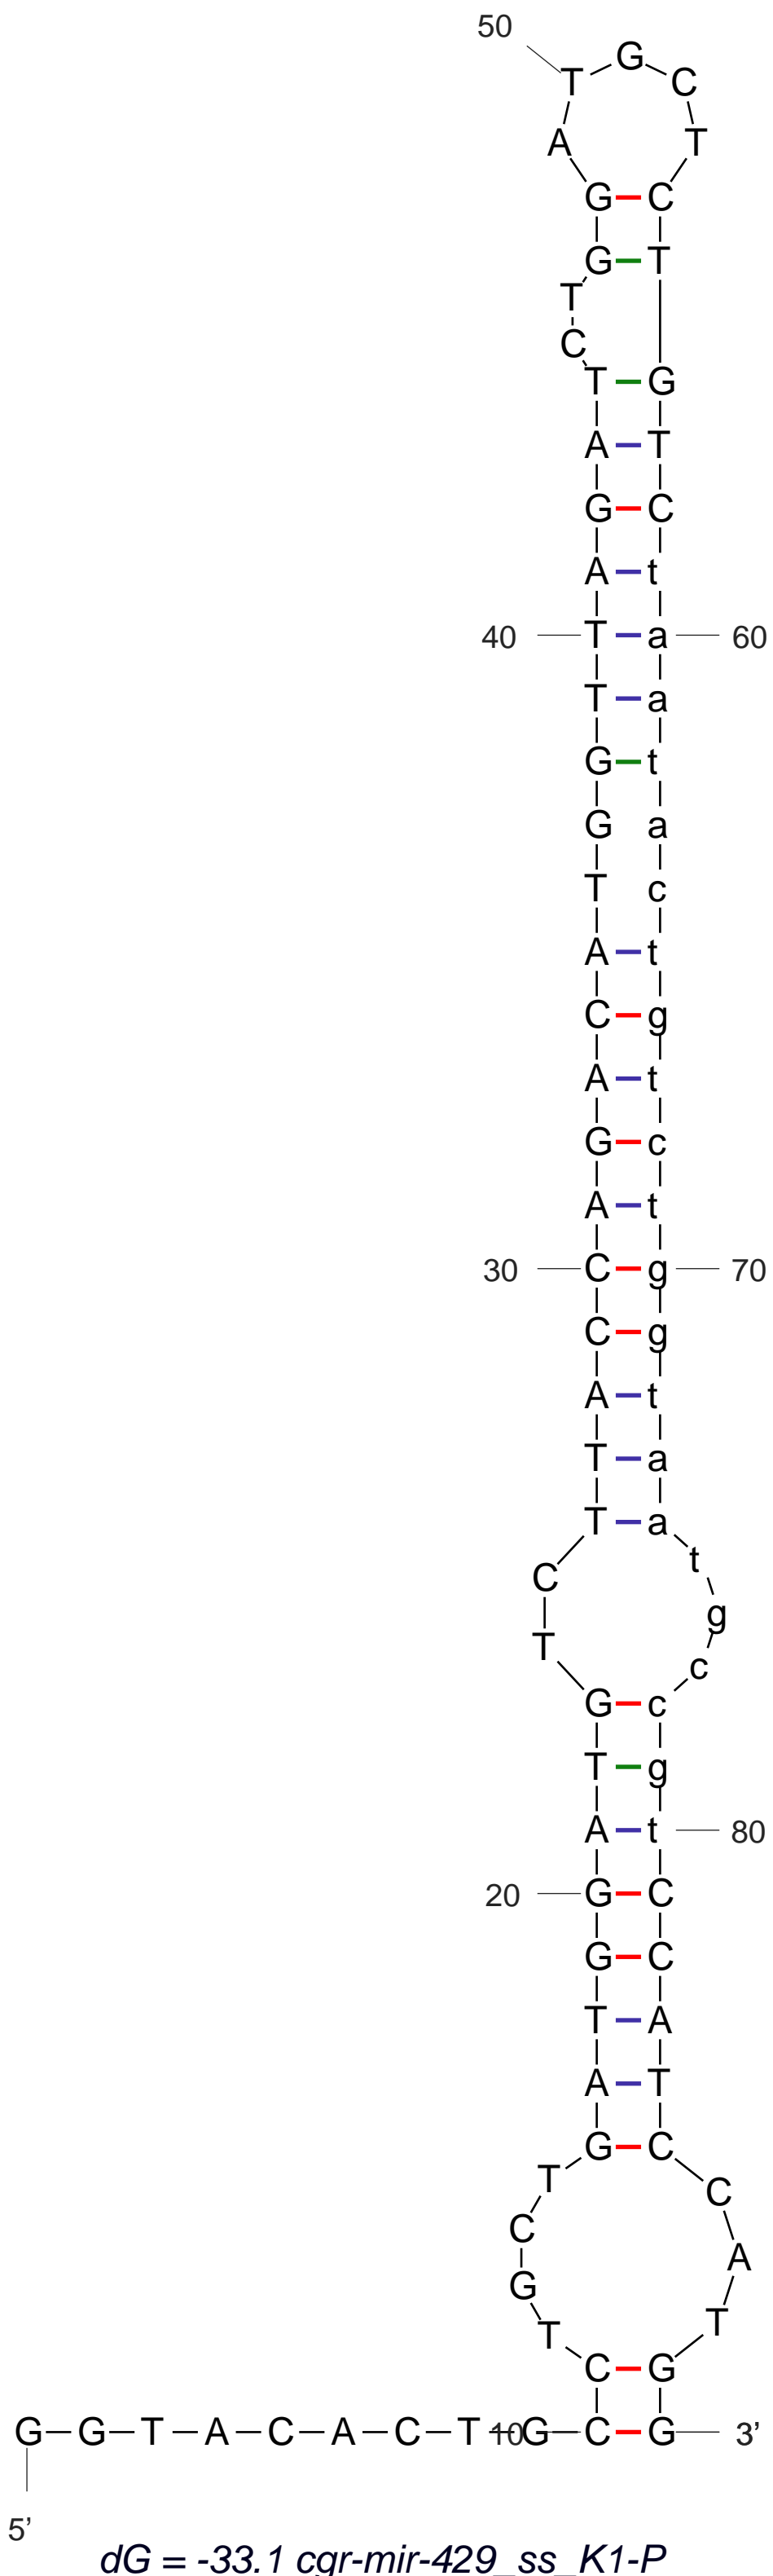





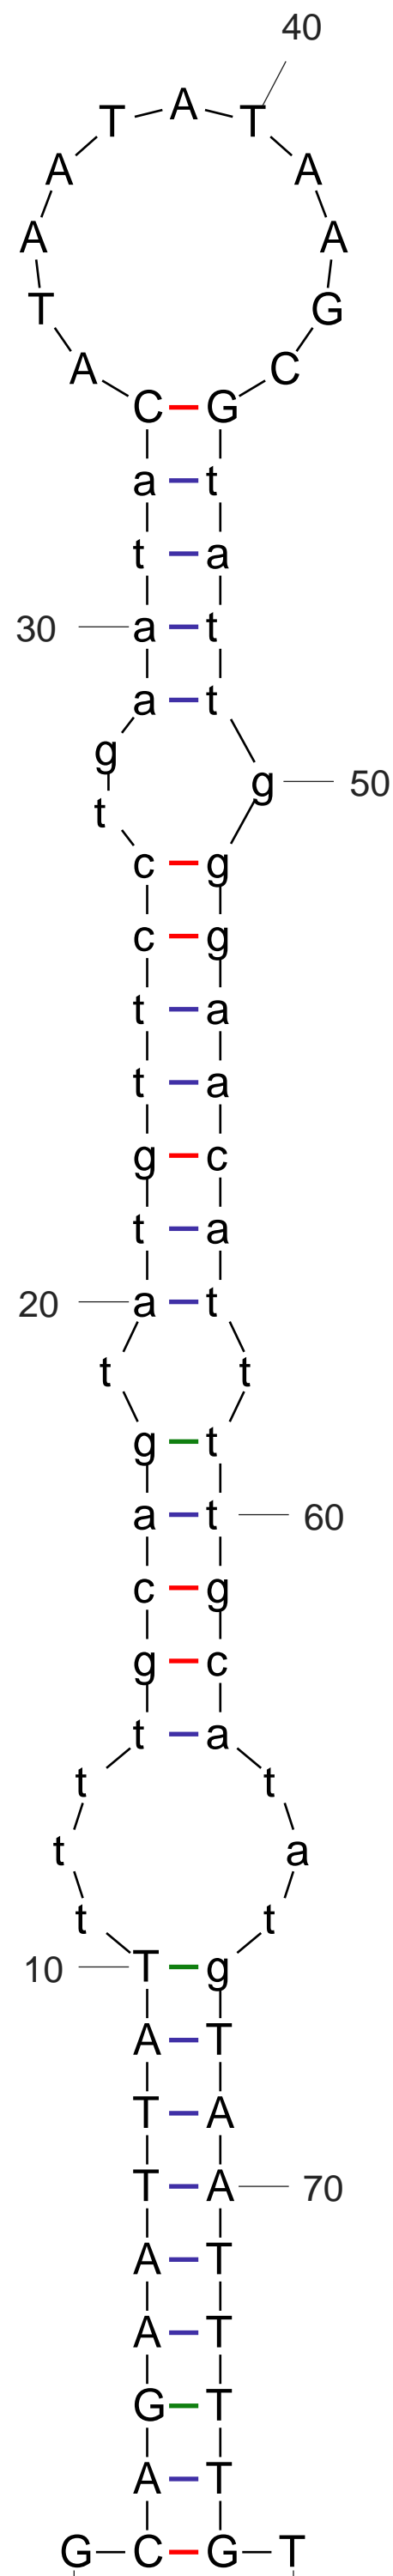

$dG = -9.47$  *cgr-mir-450b\_db\_K1-P*

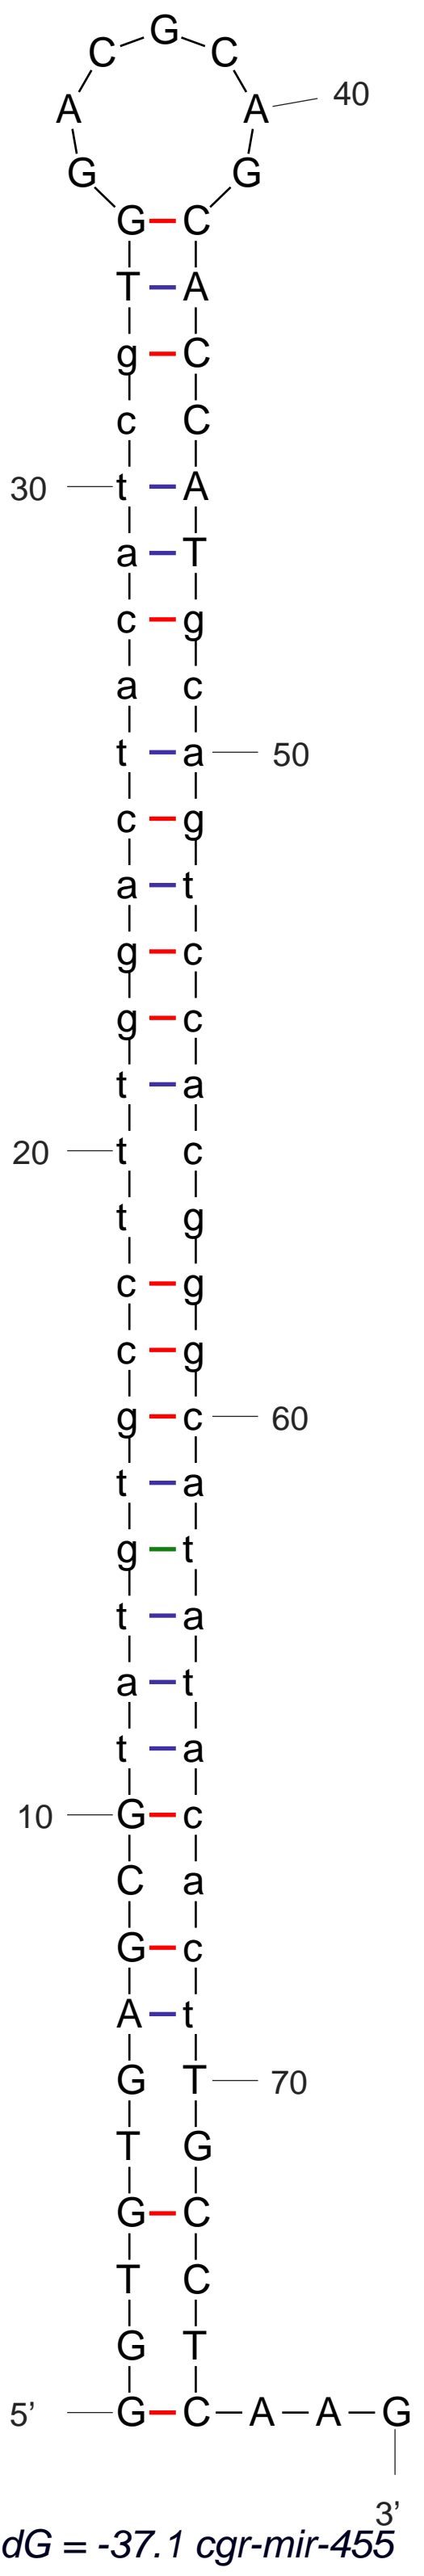

dG = -37.1 cgr-mir-455

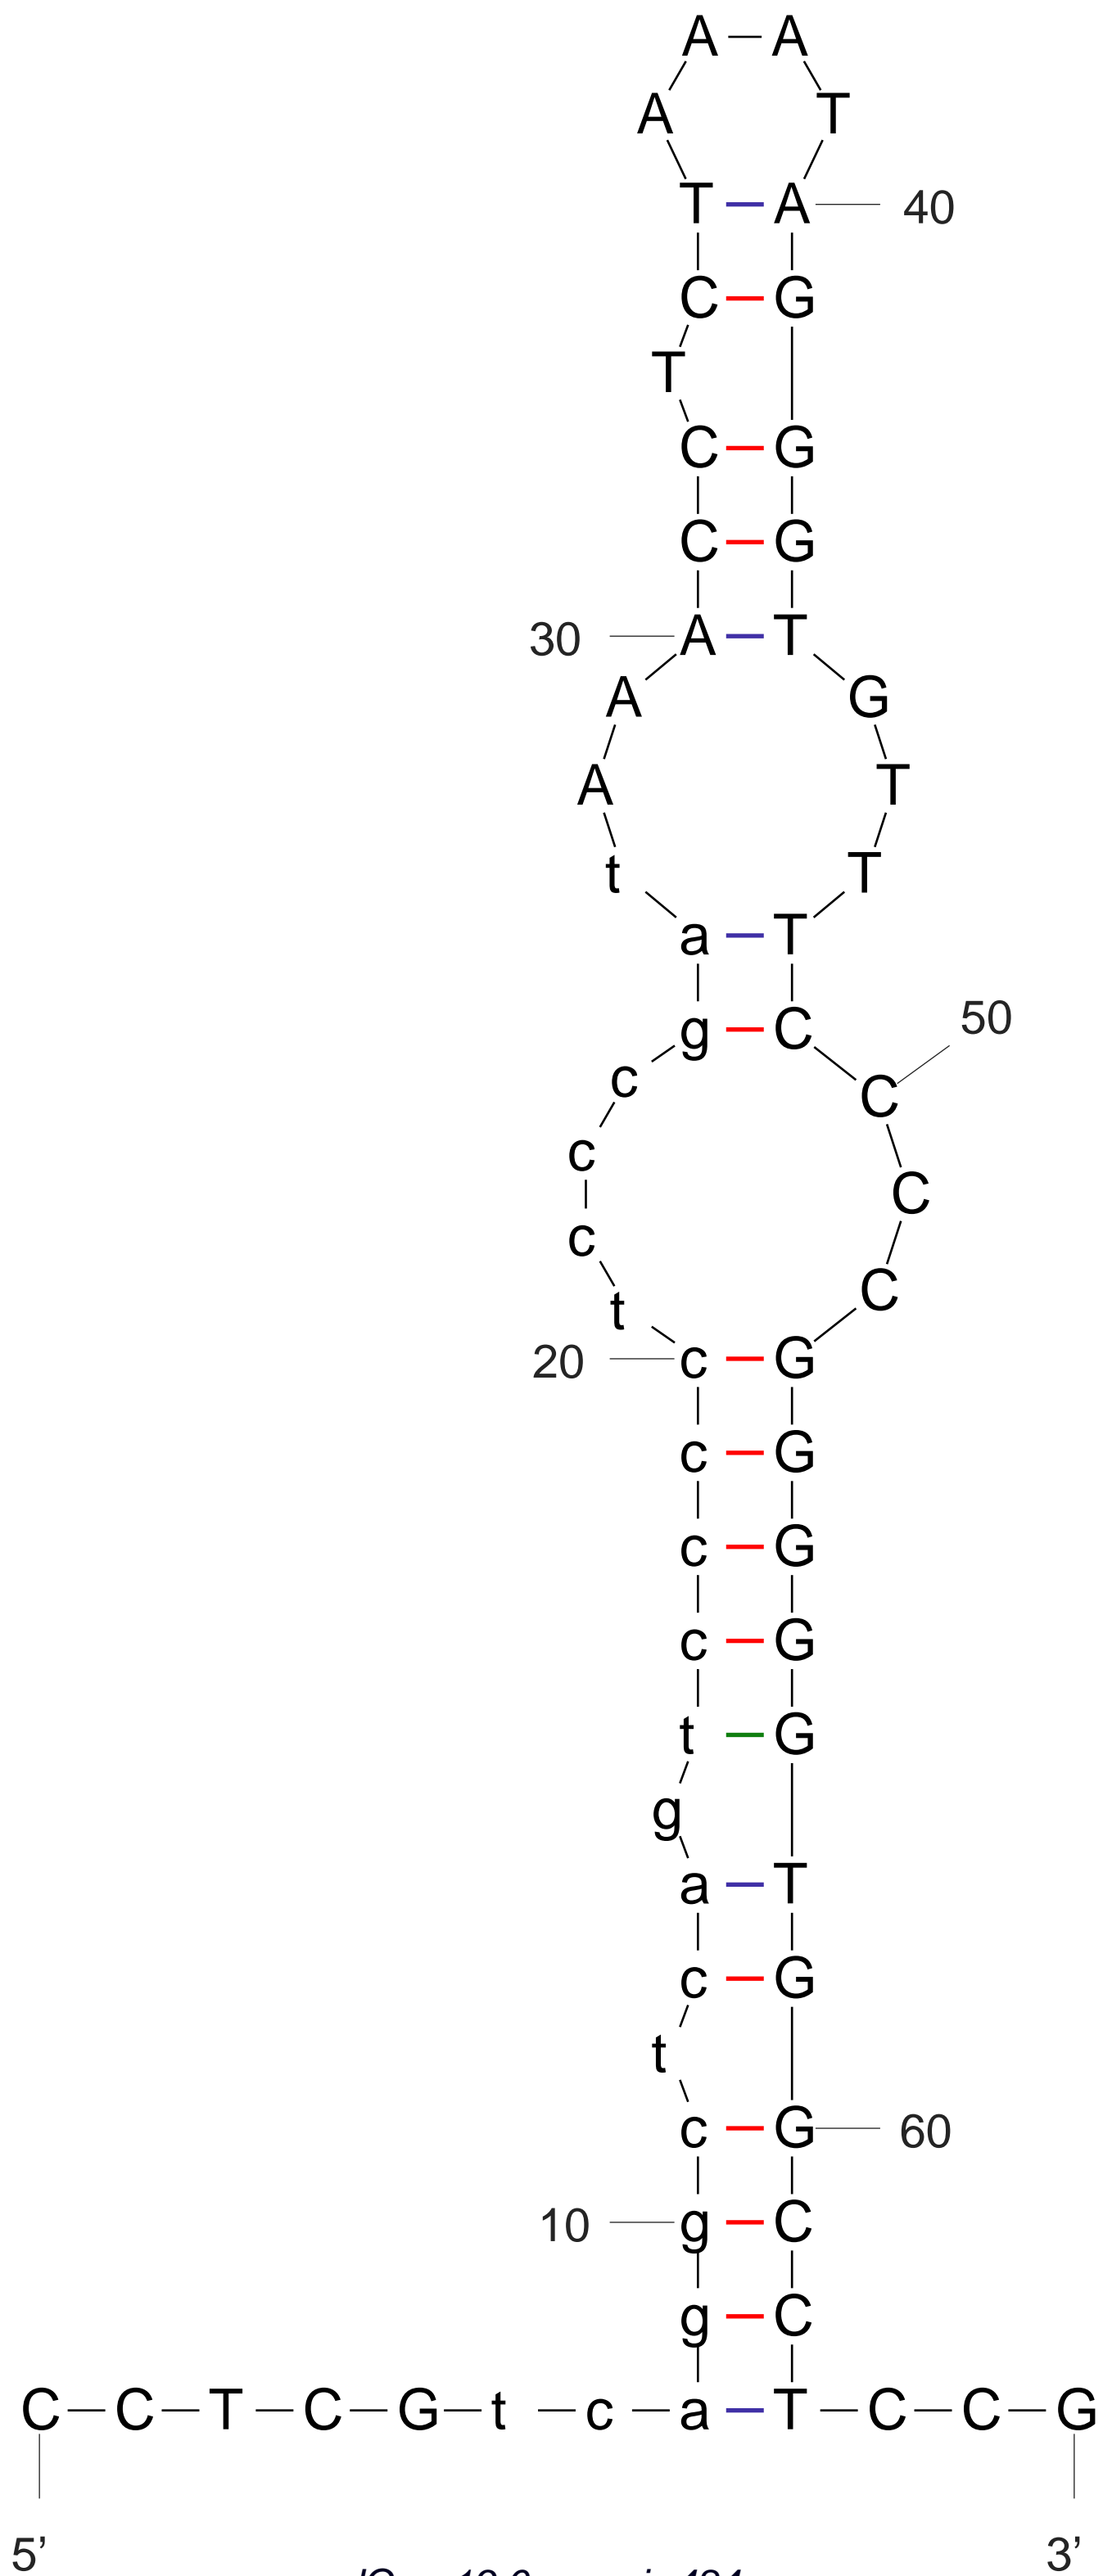

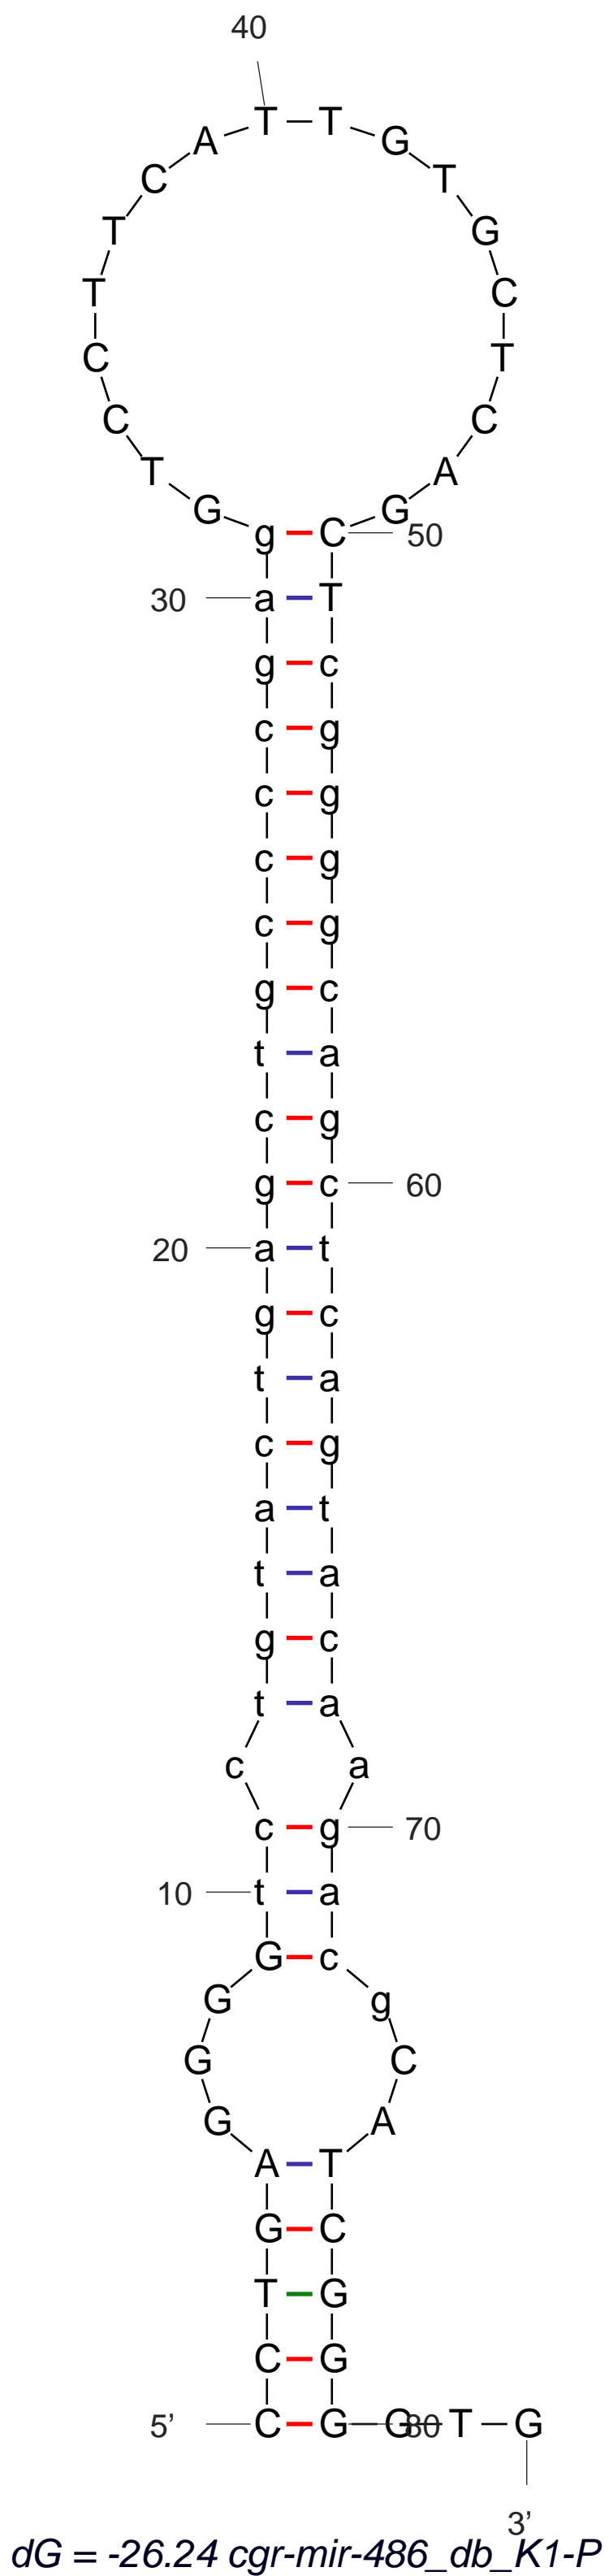

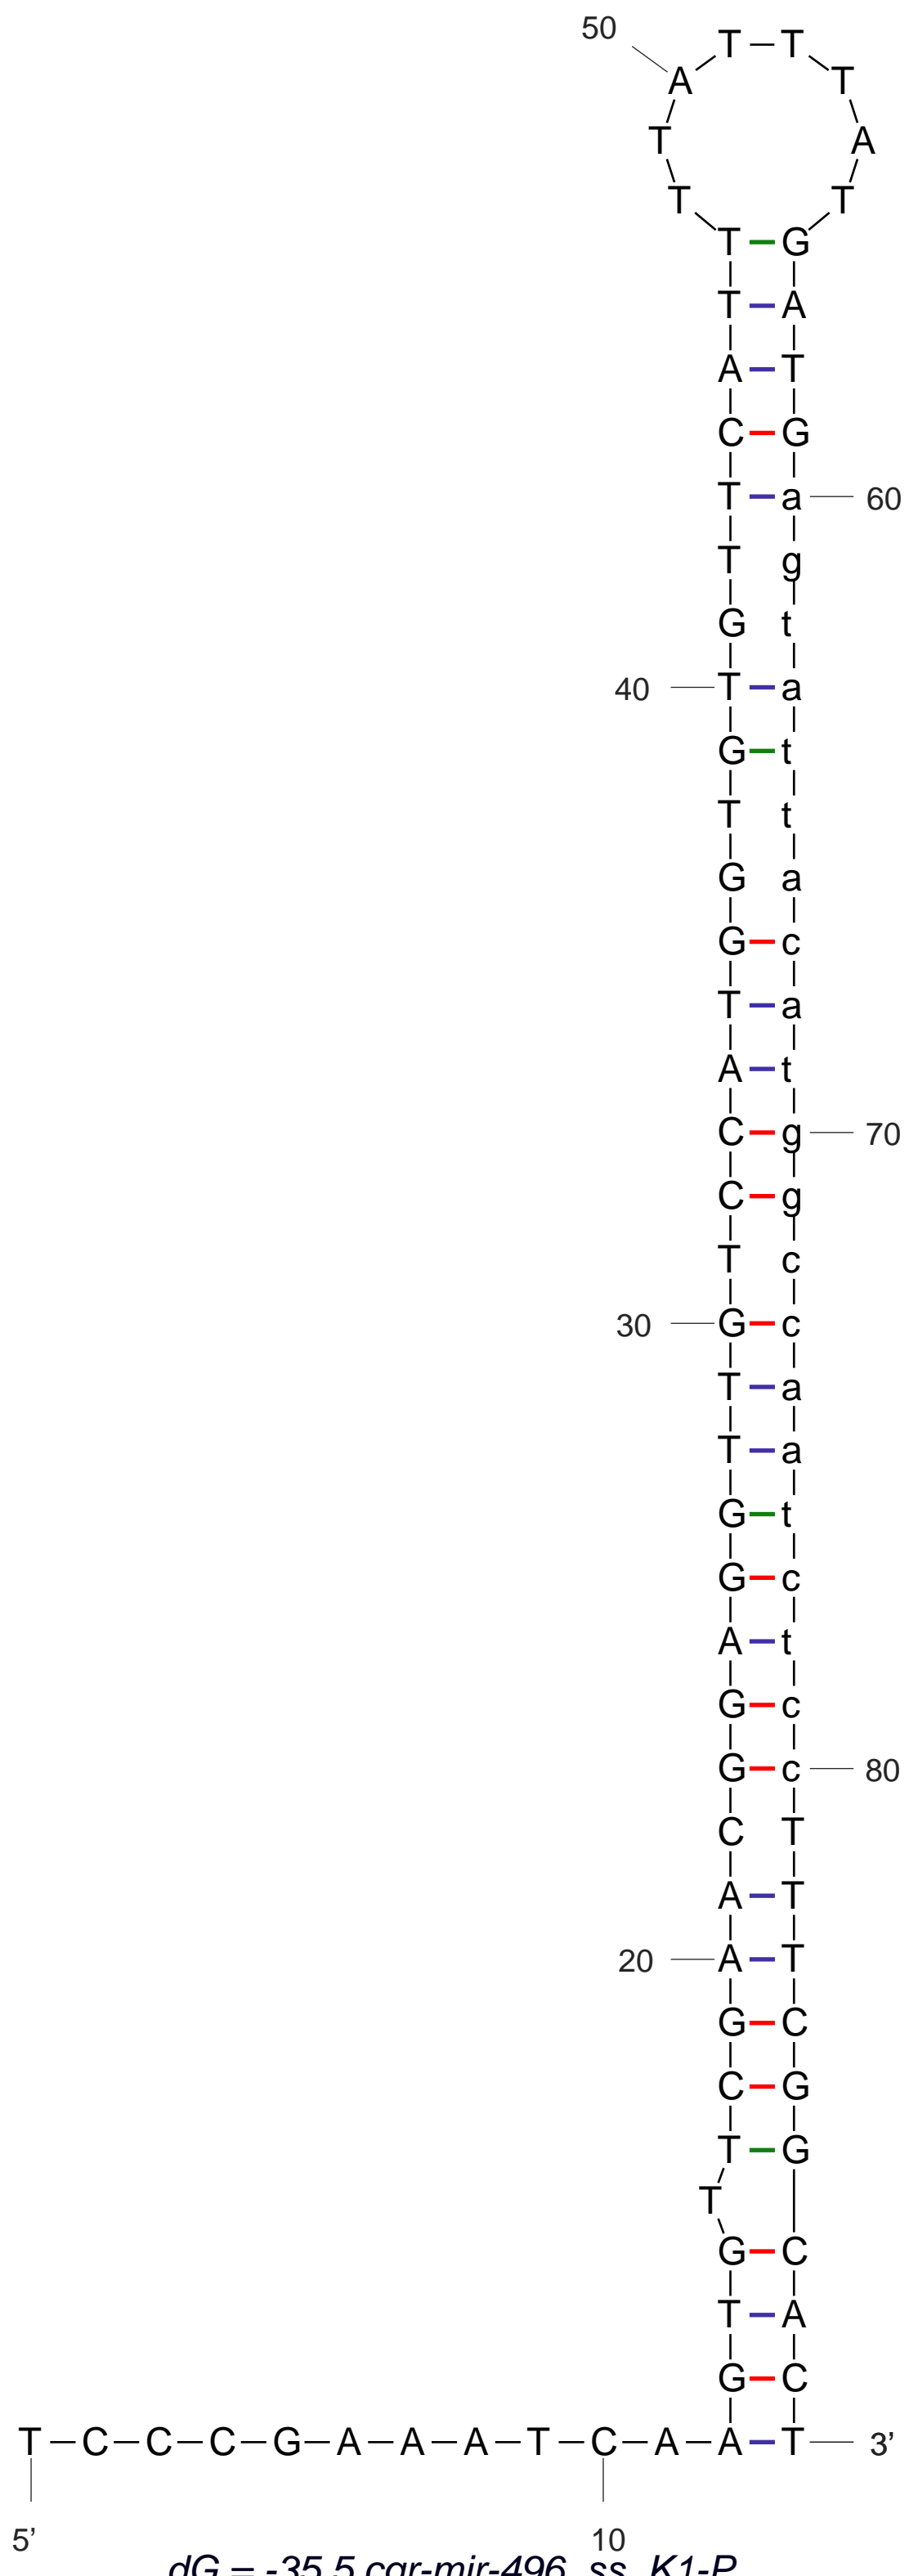

dG = -35.5 cgr-mir-496\_ss\_K1-P

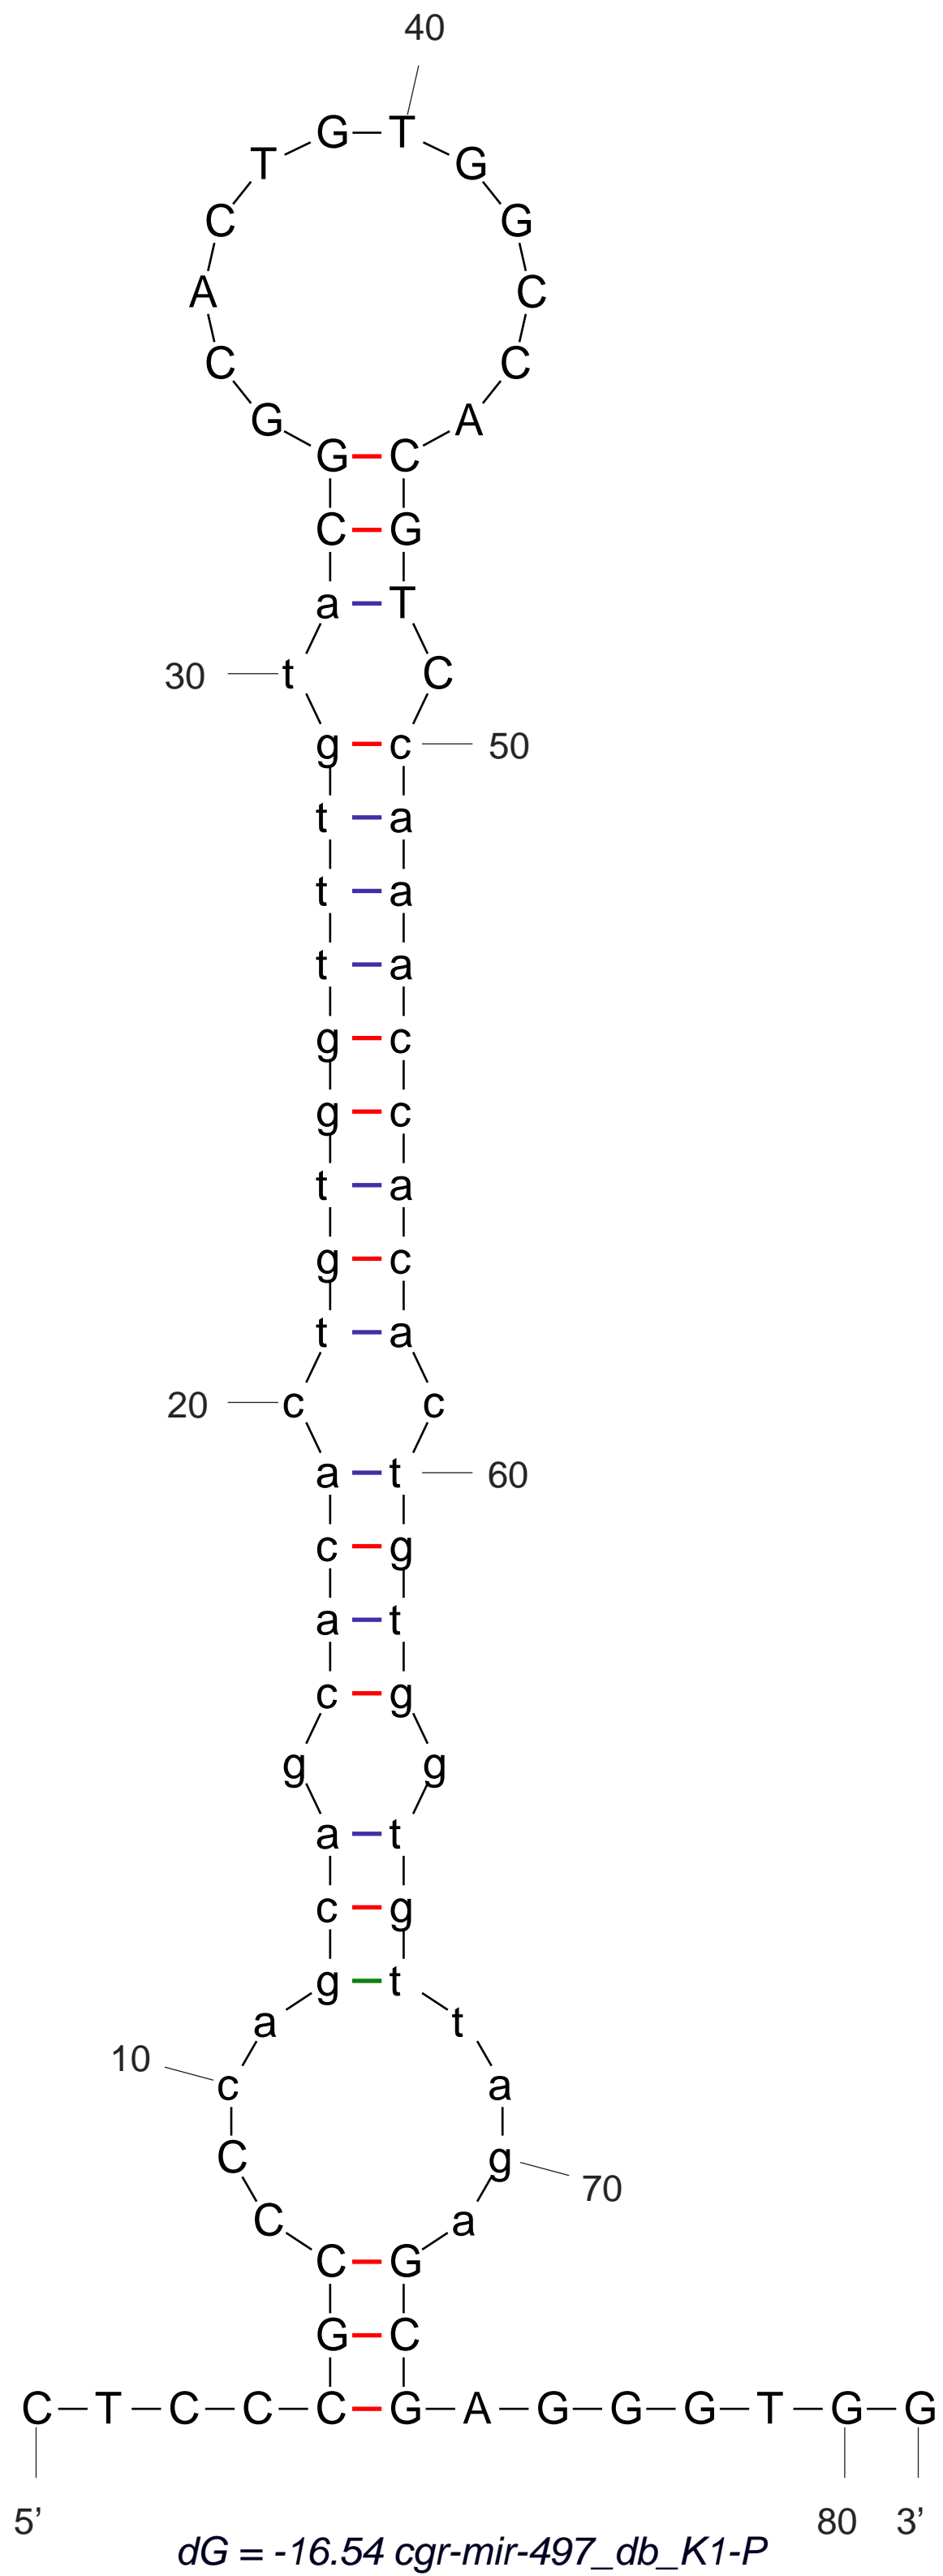

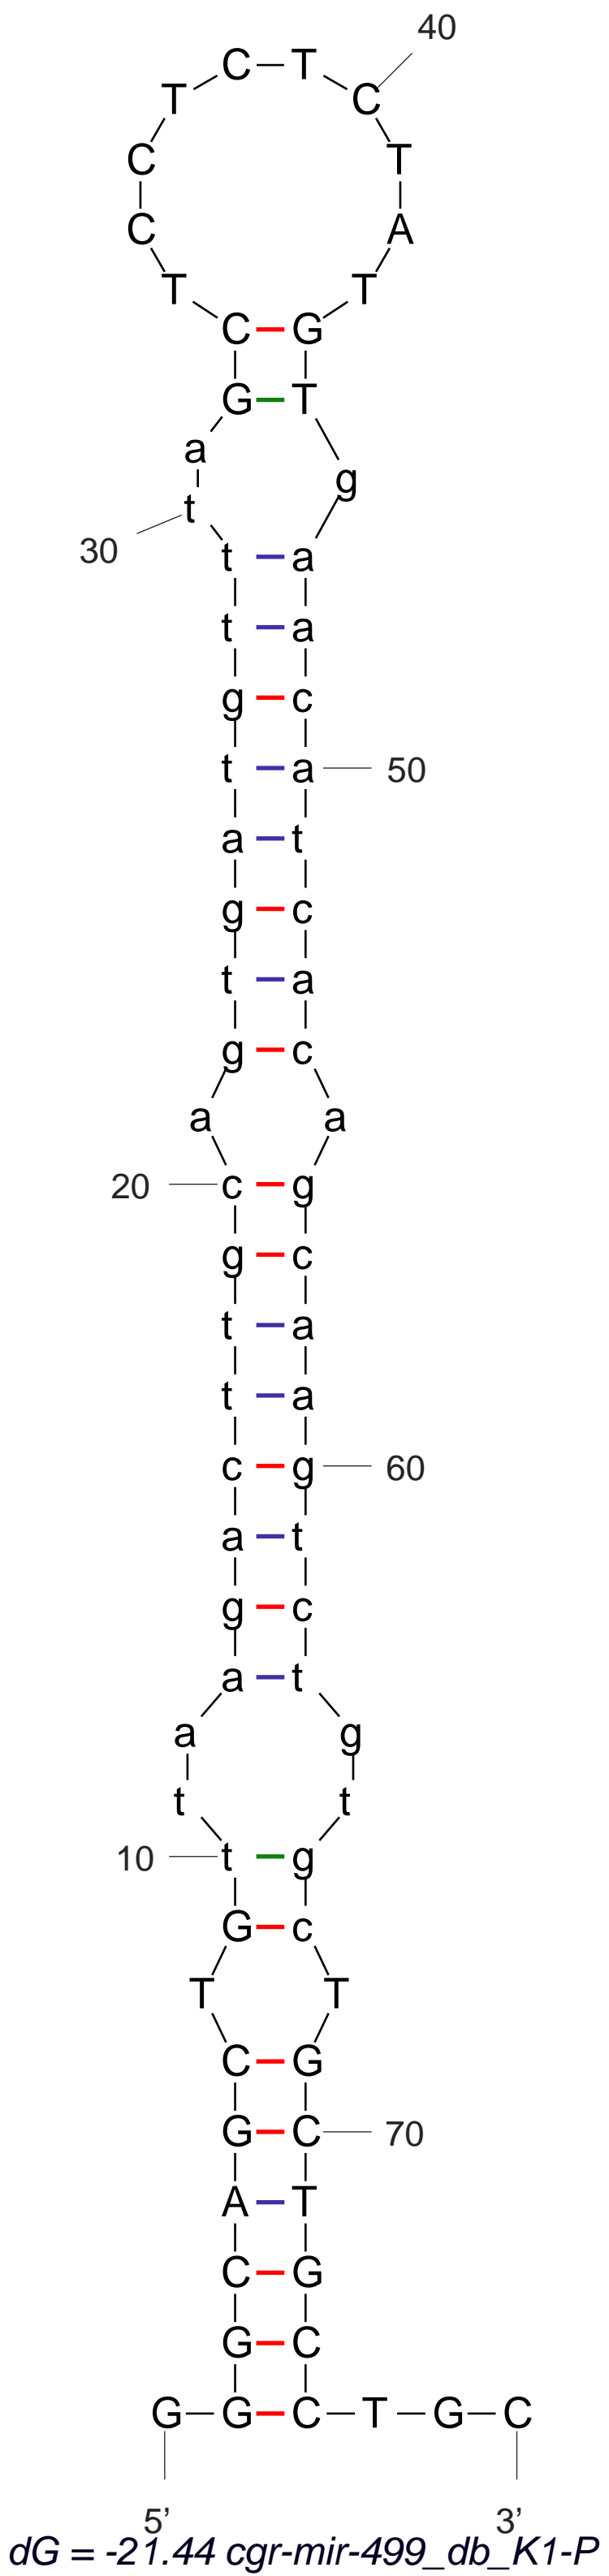



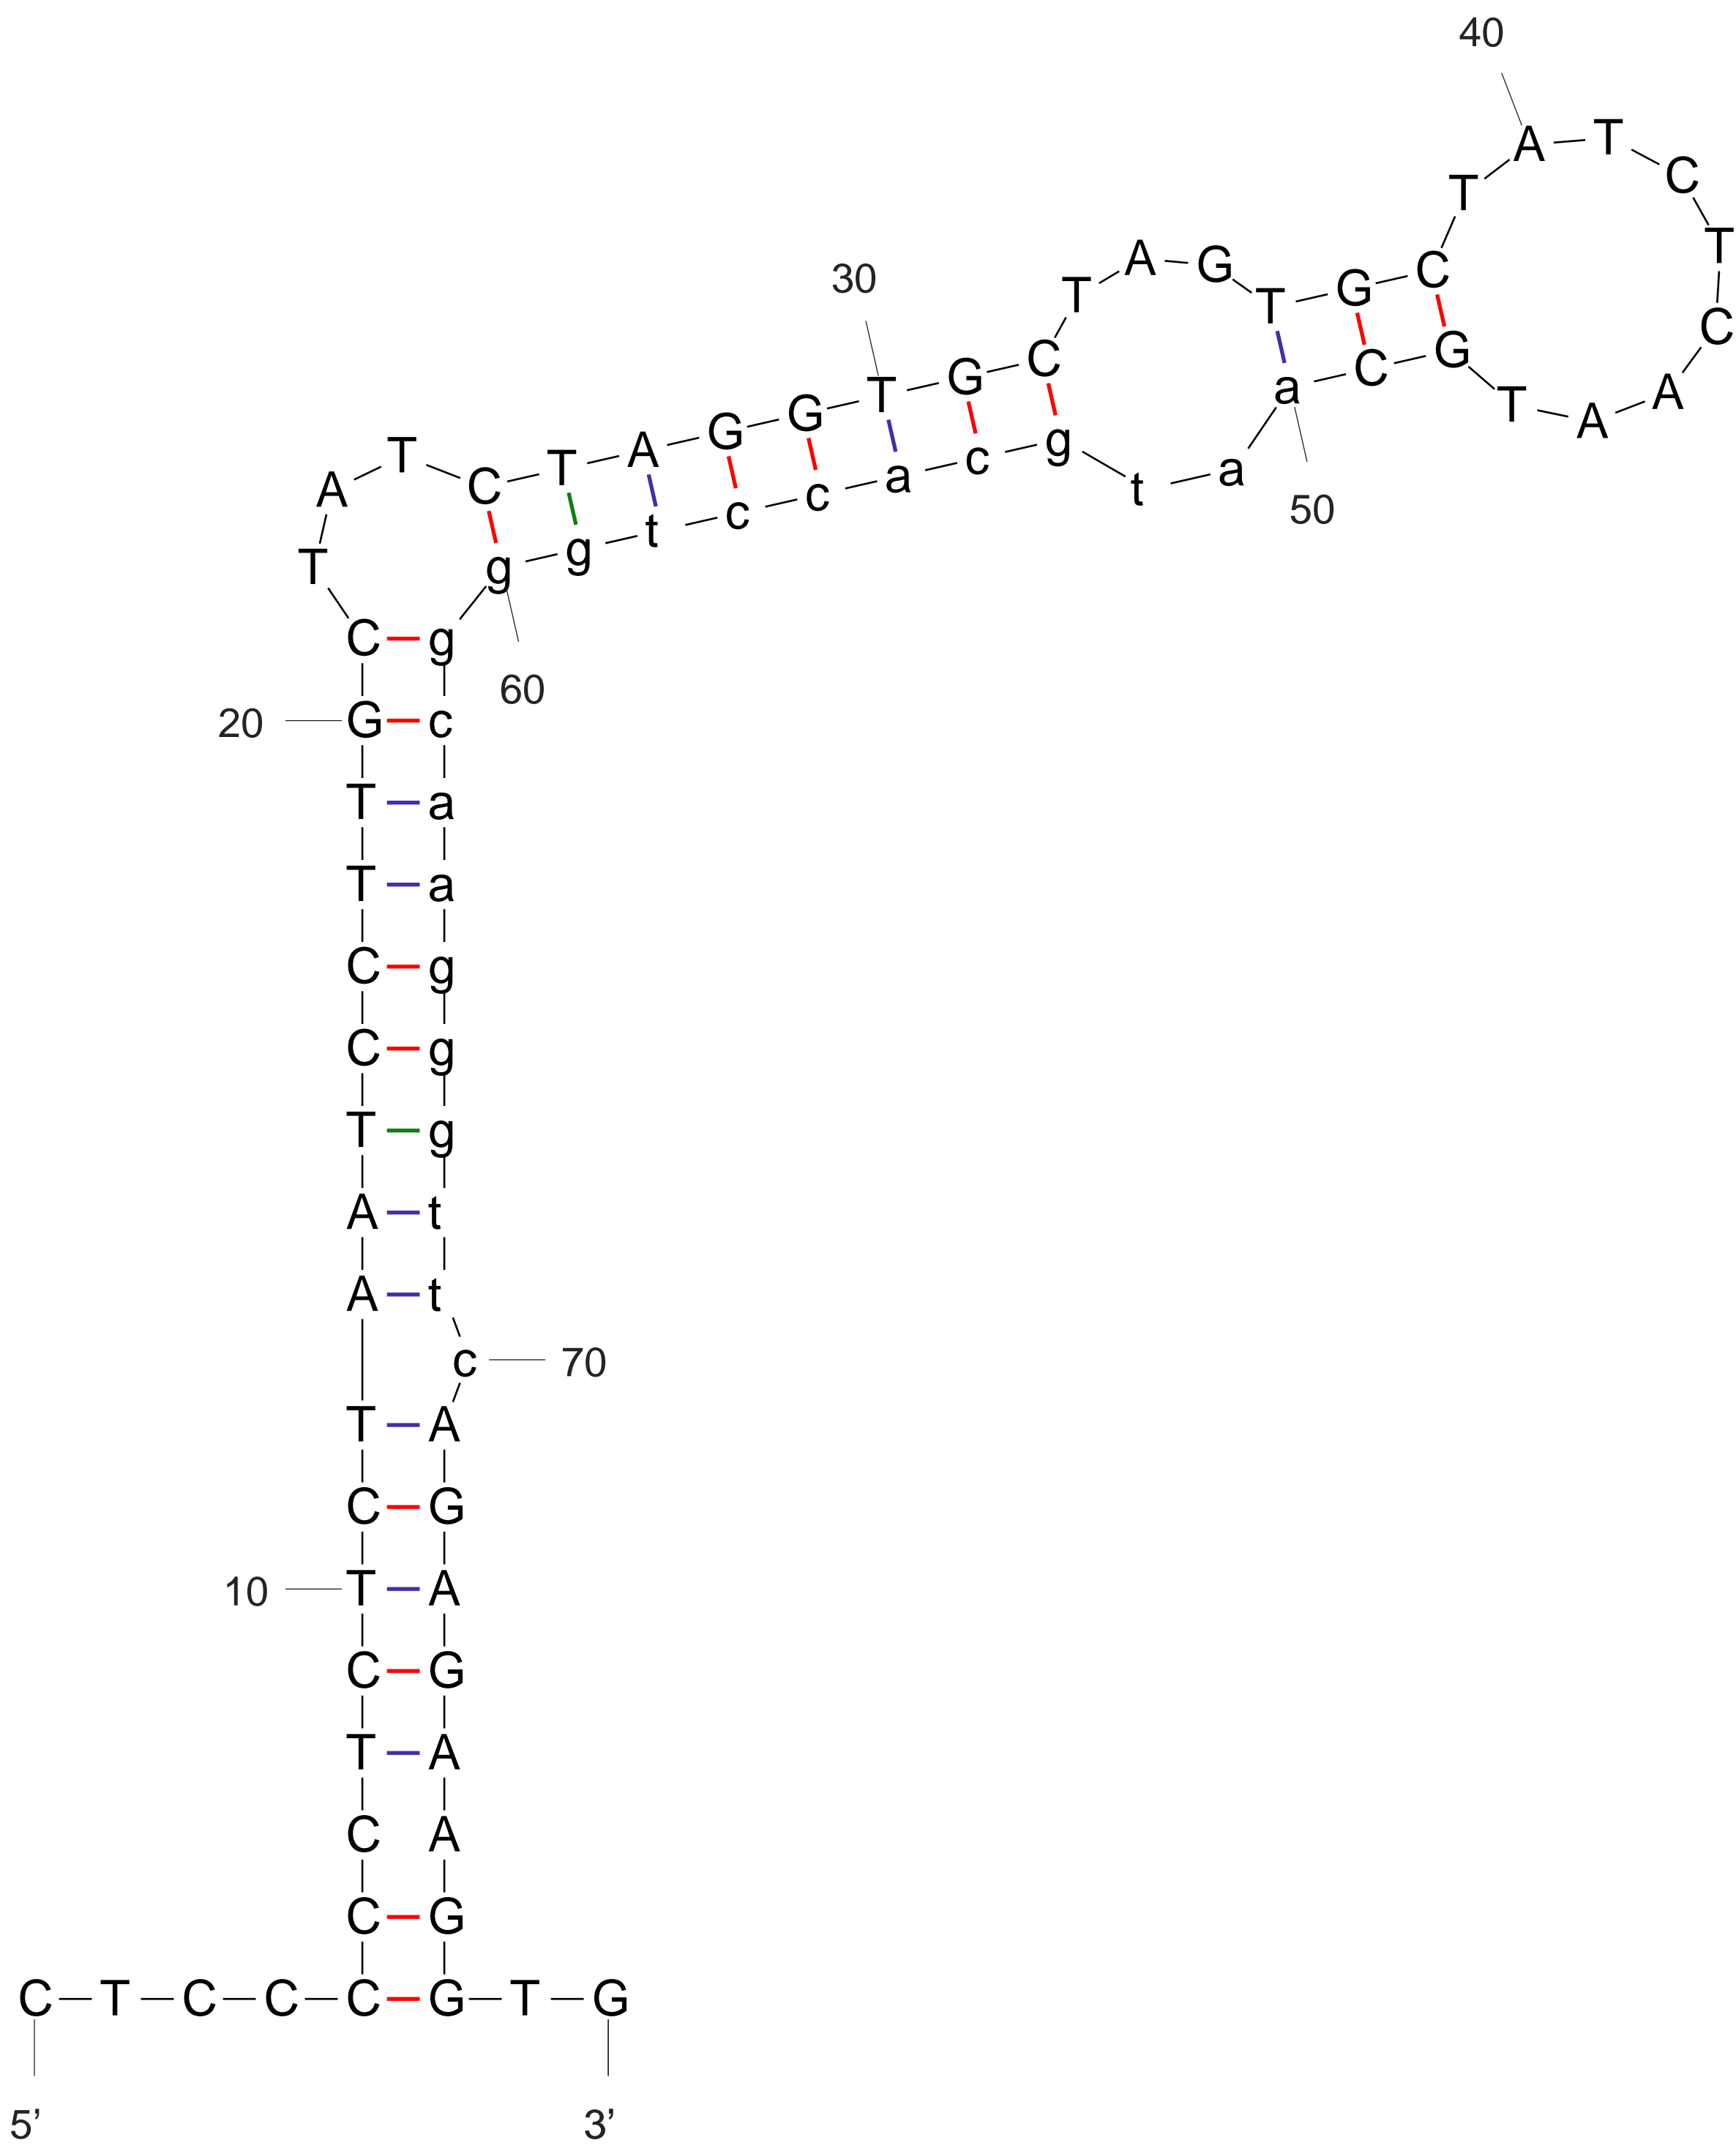

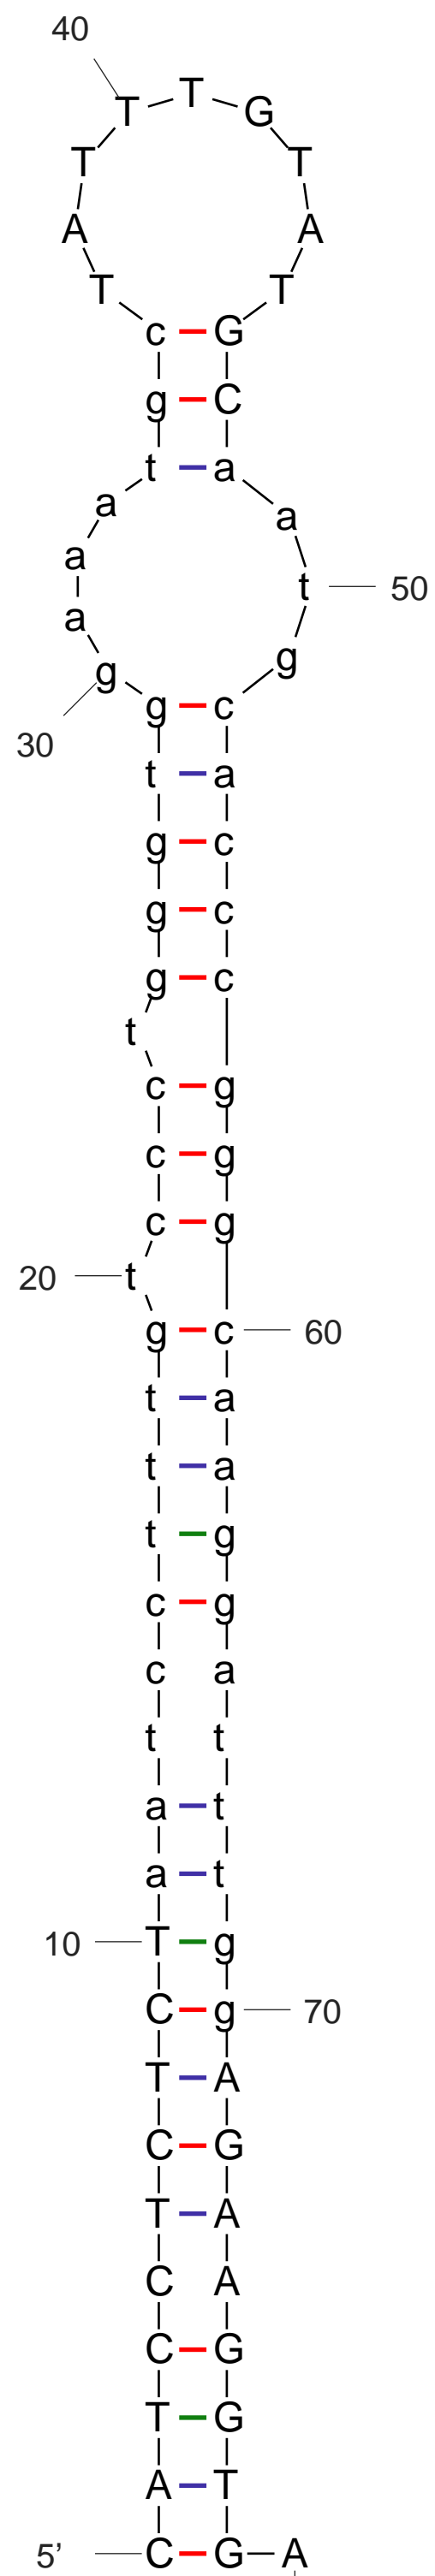

$dG = -34.3$  *cgr-mir-501*

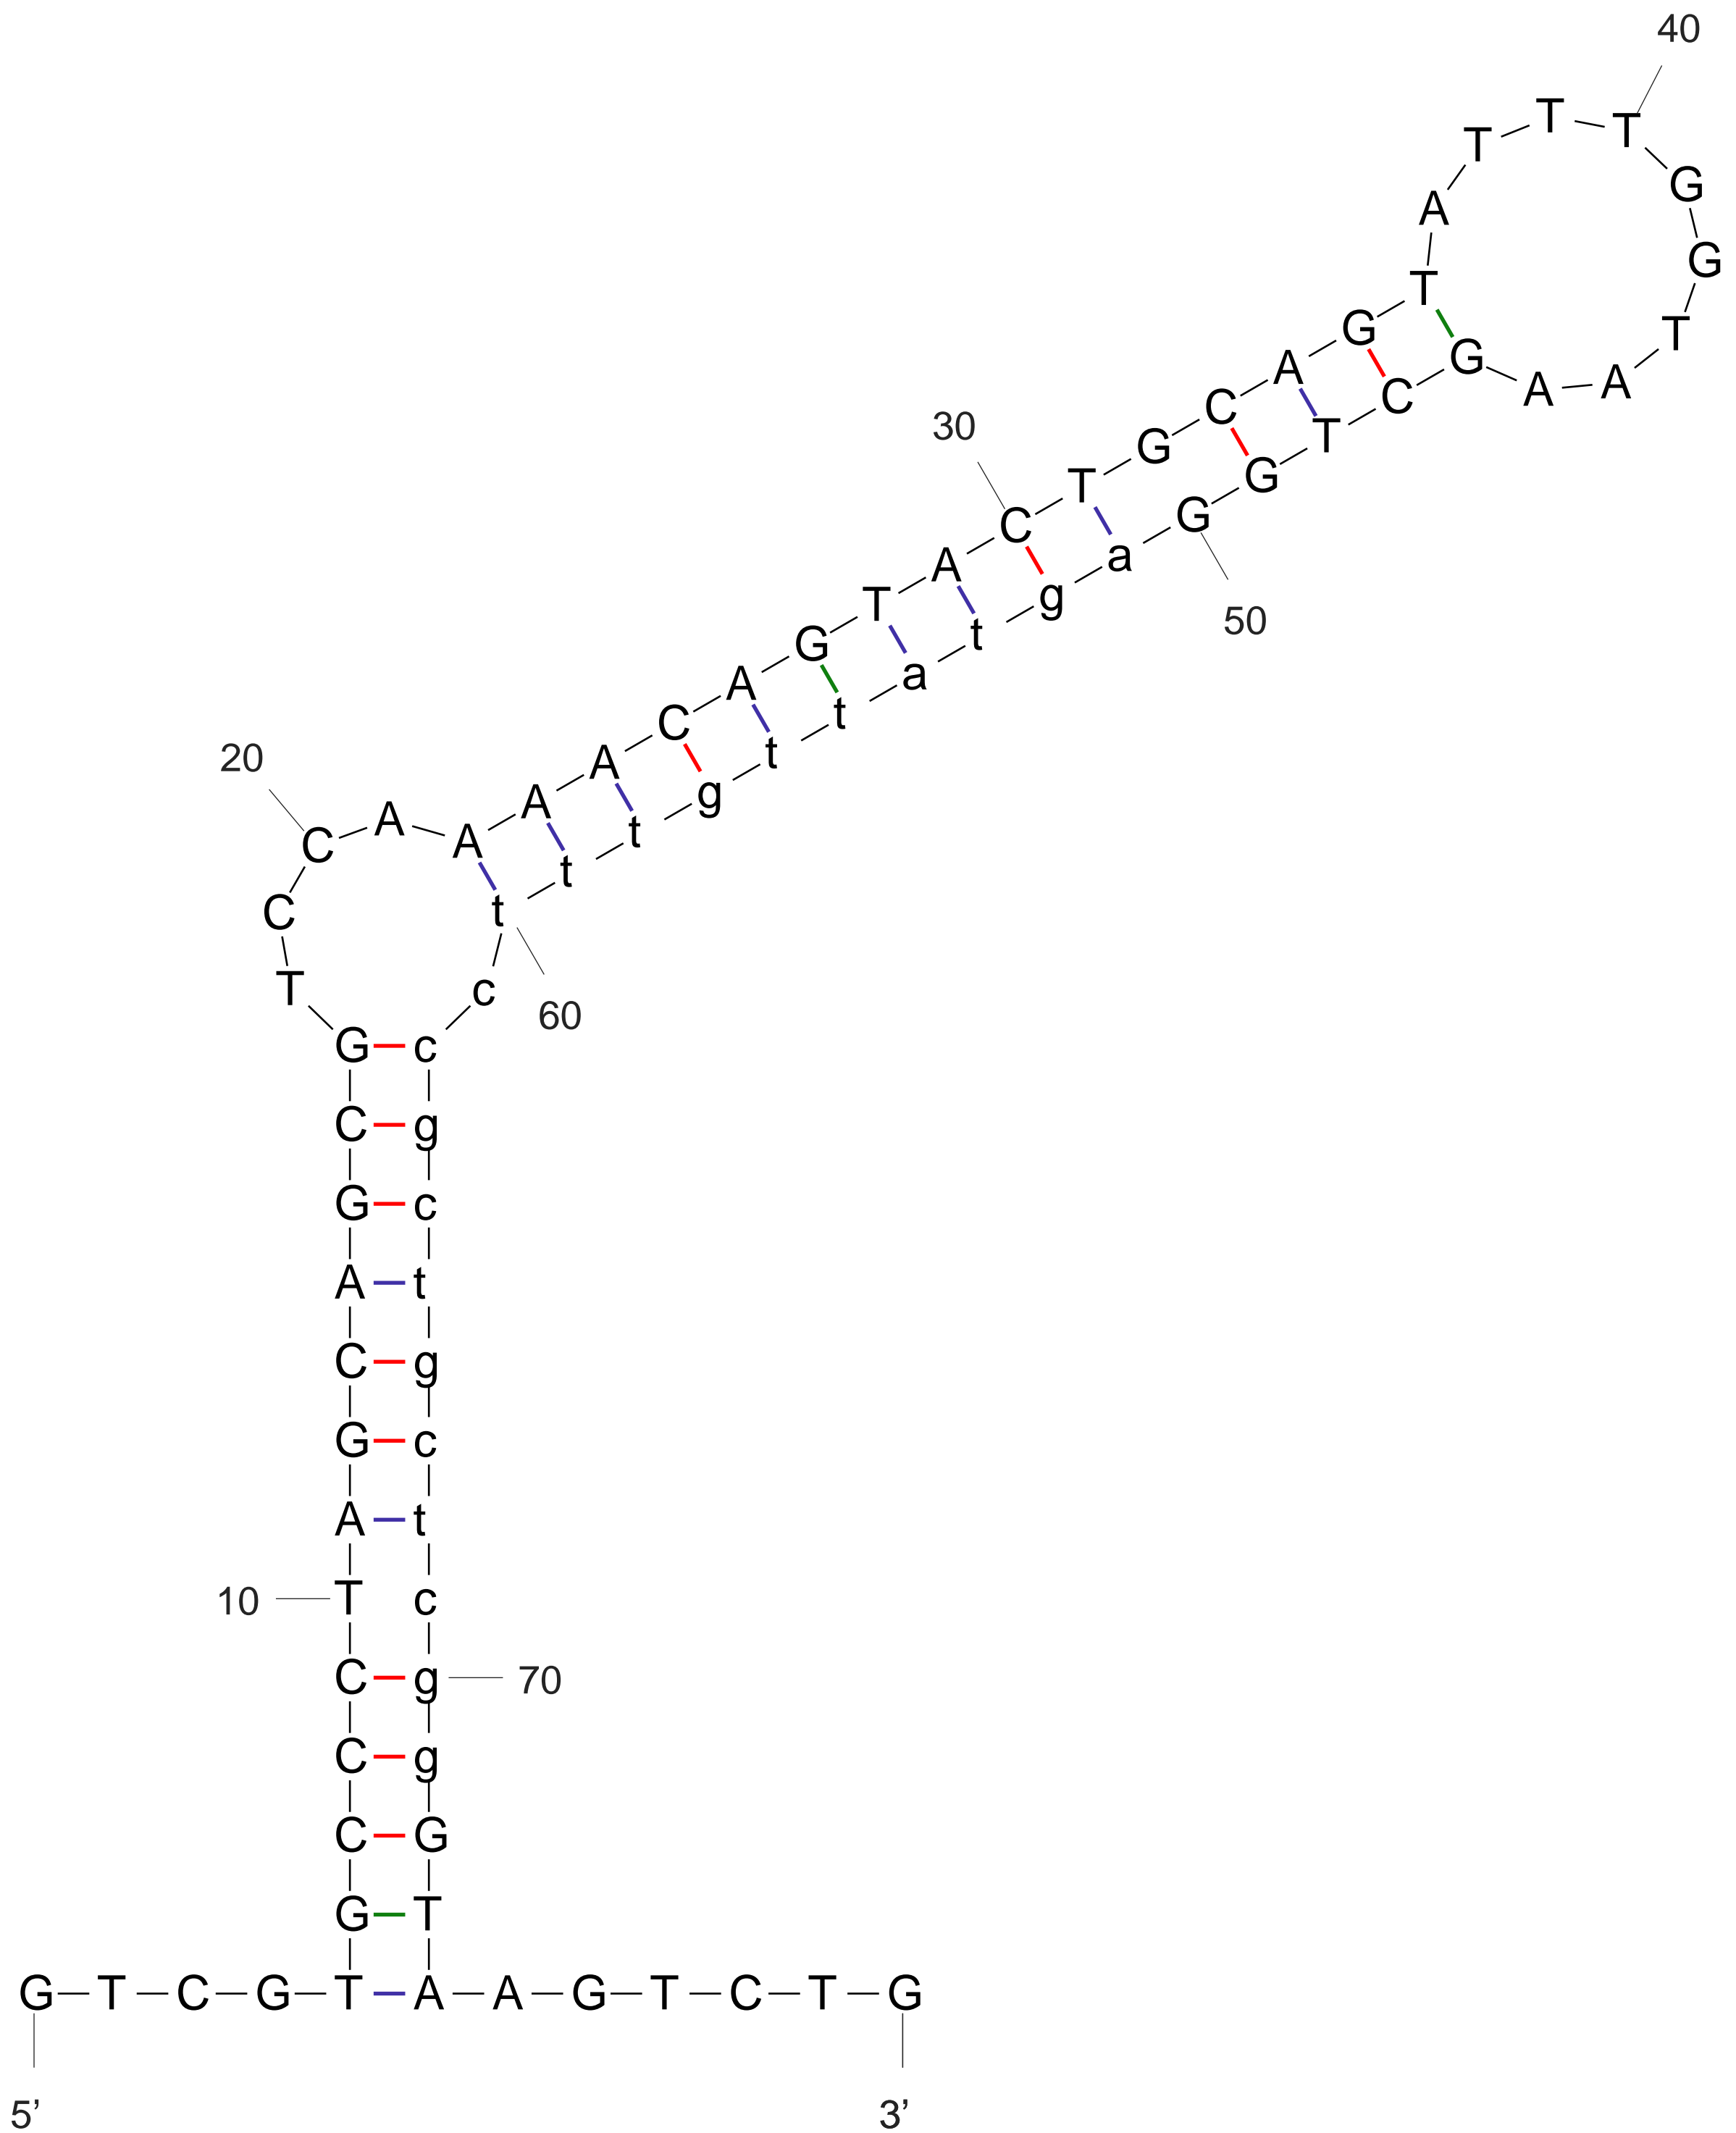

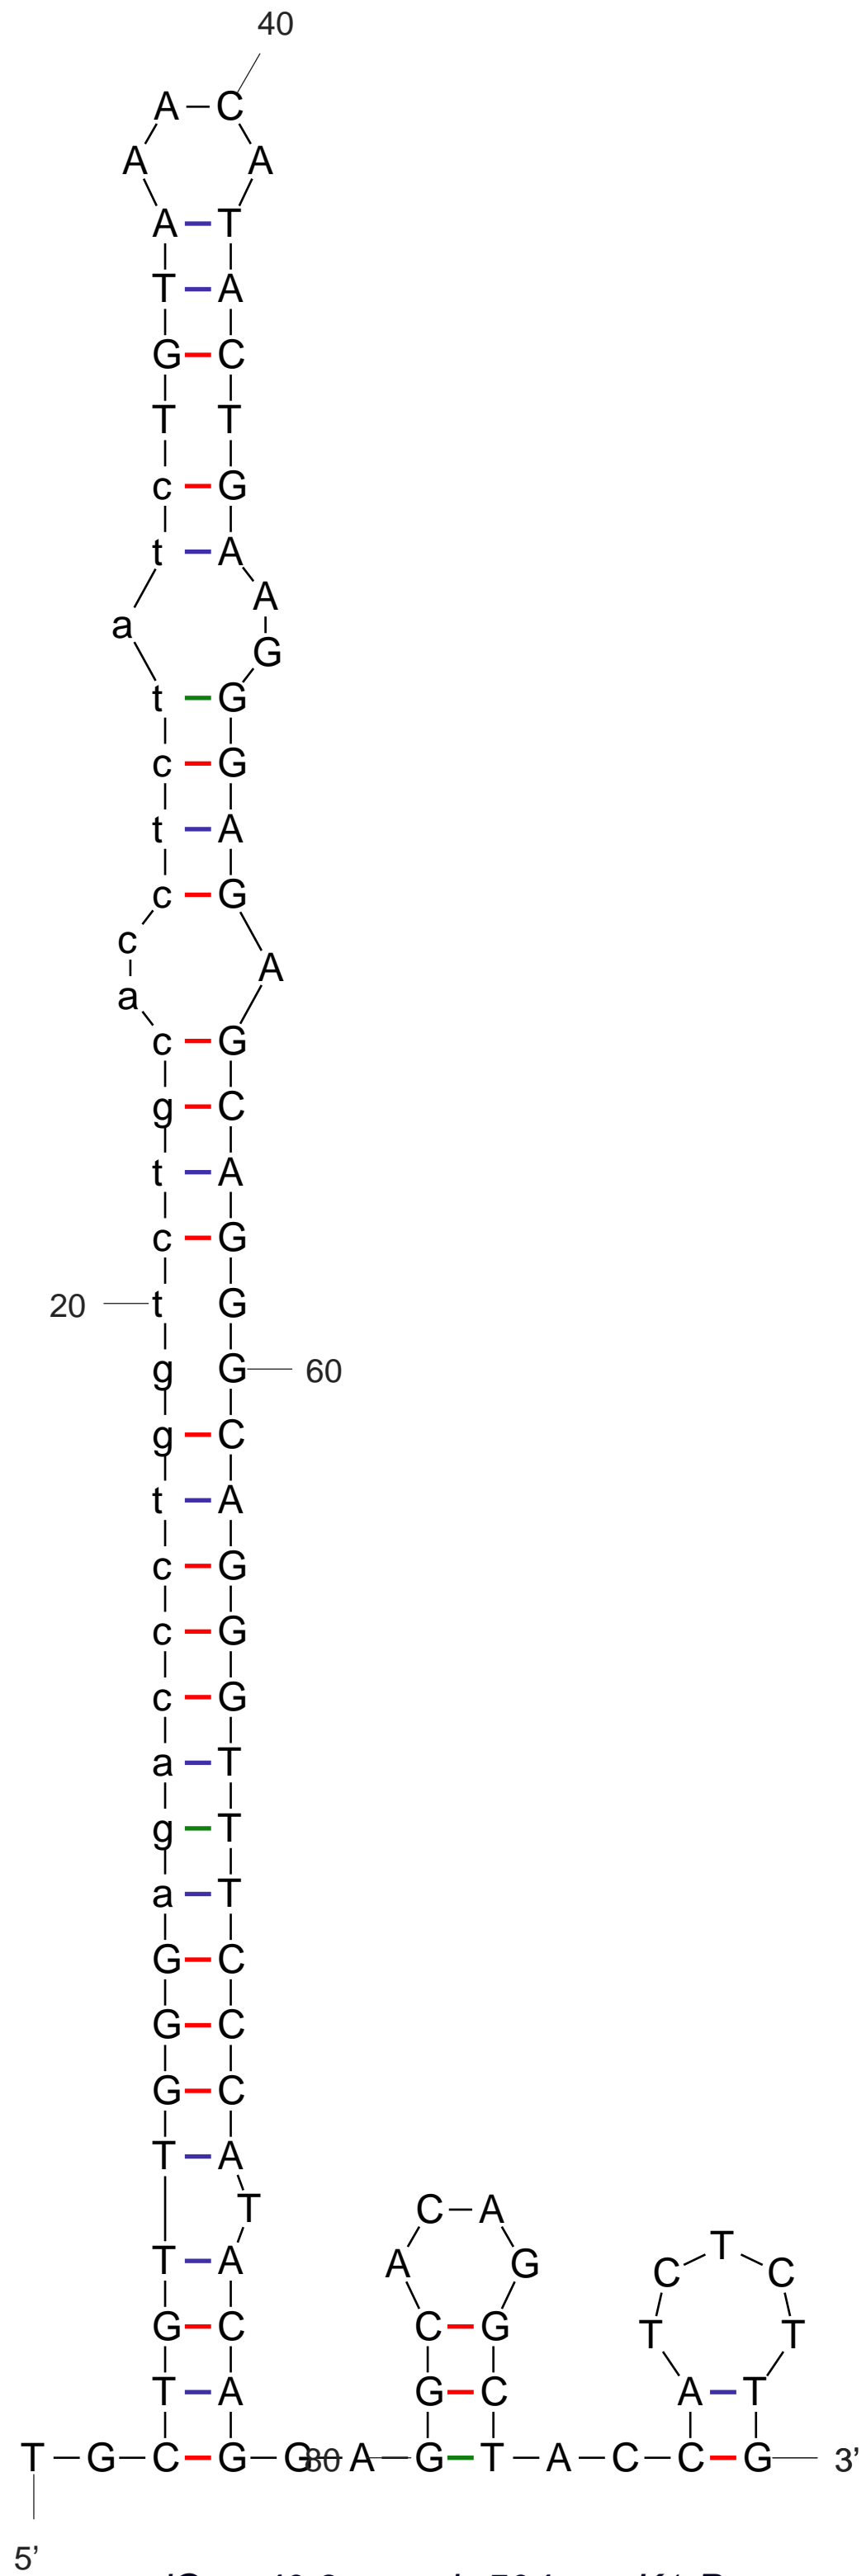

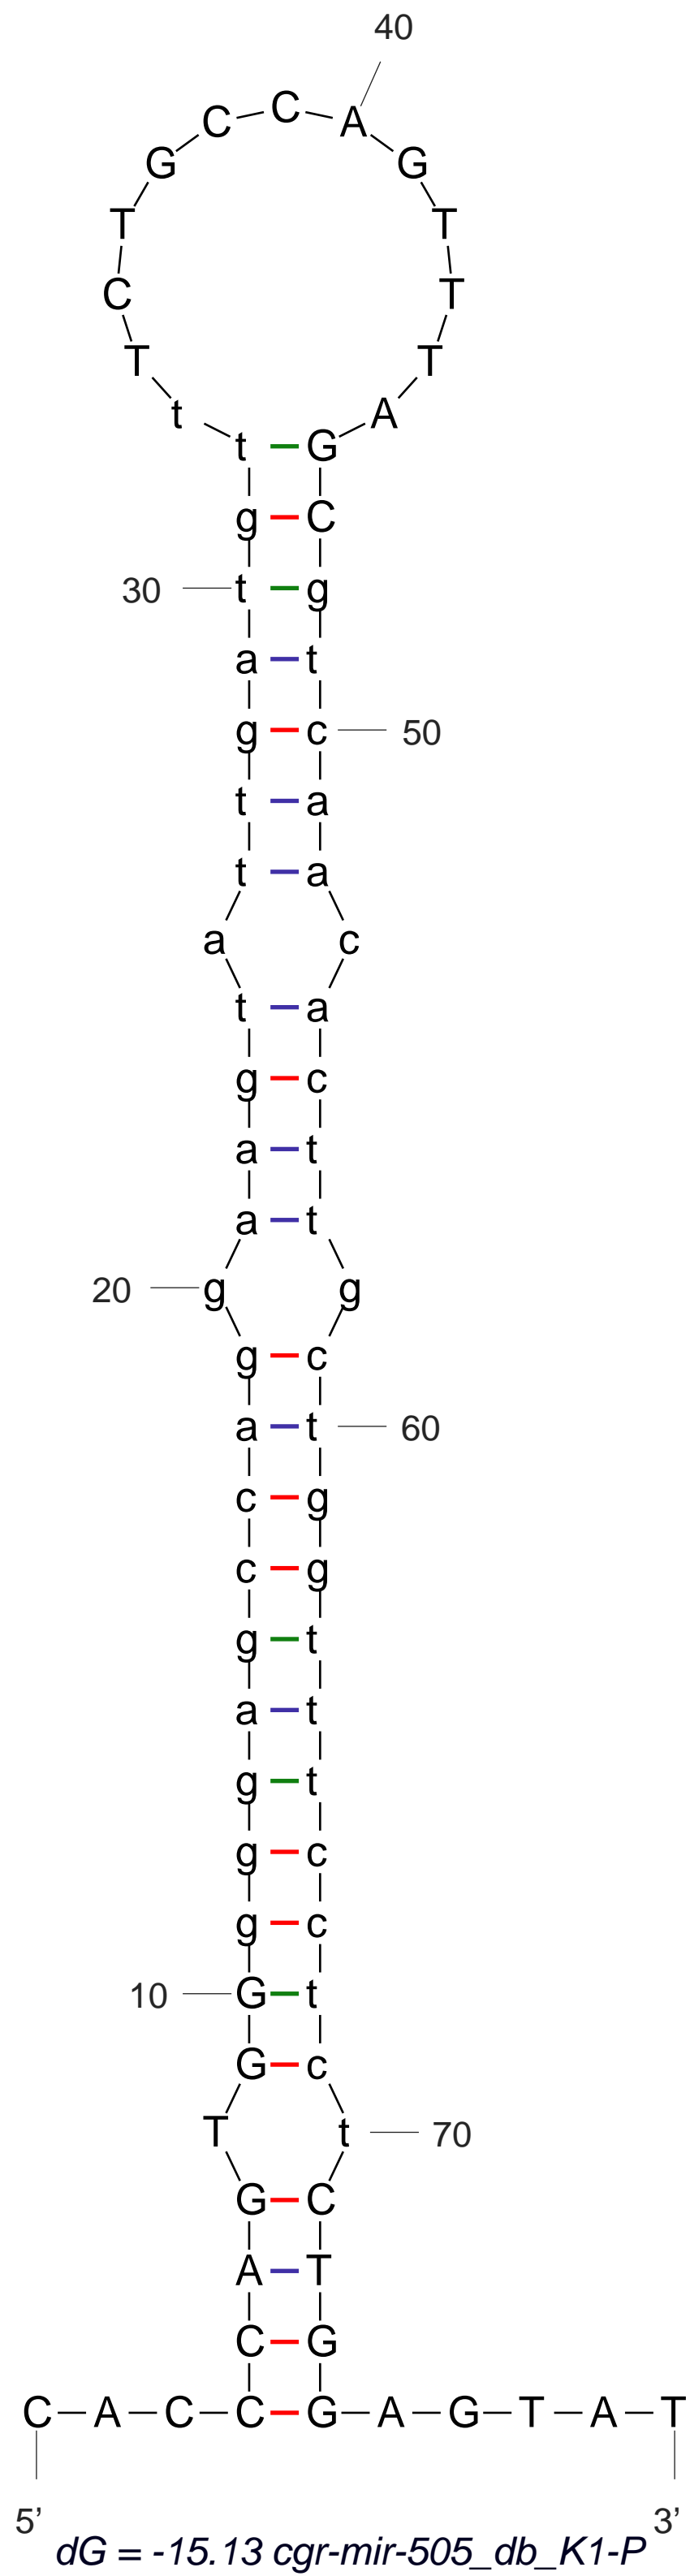

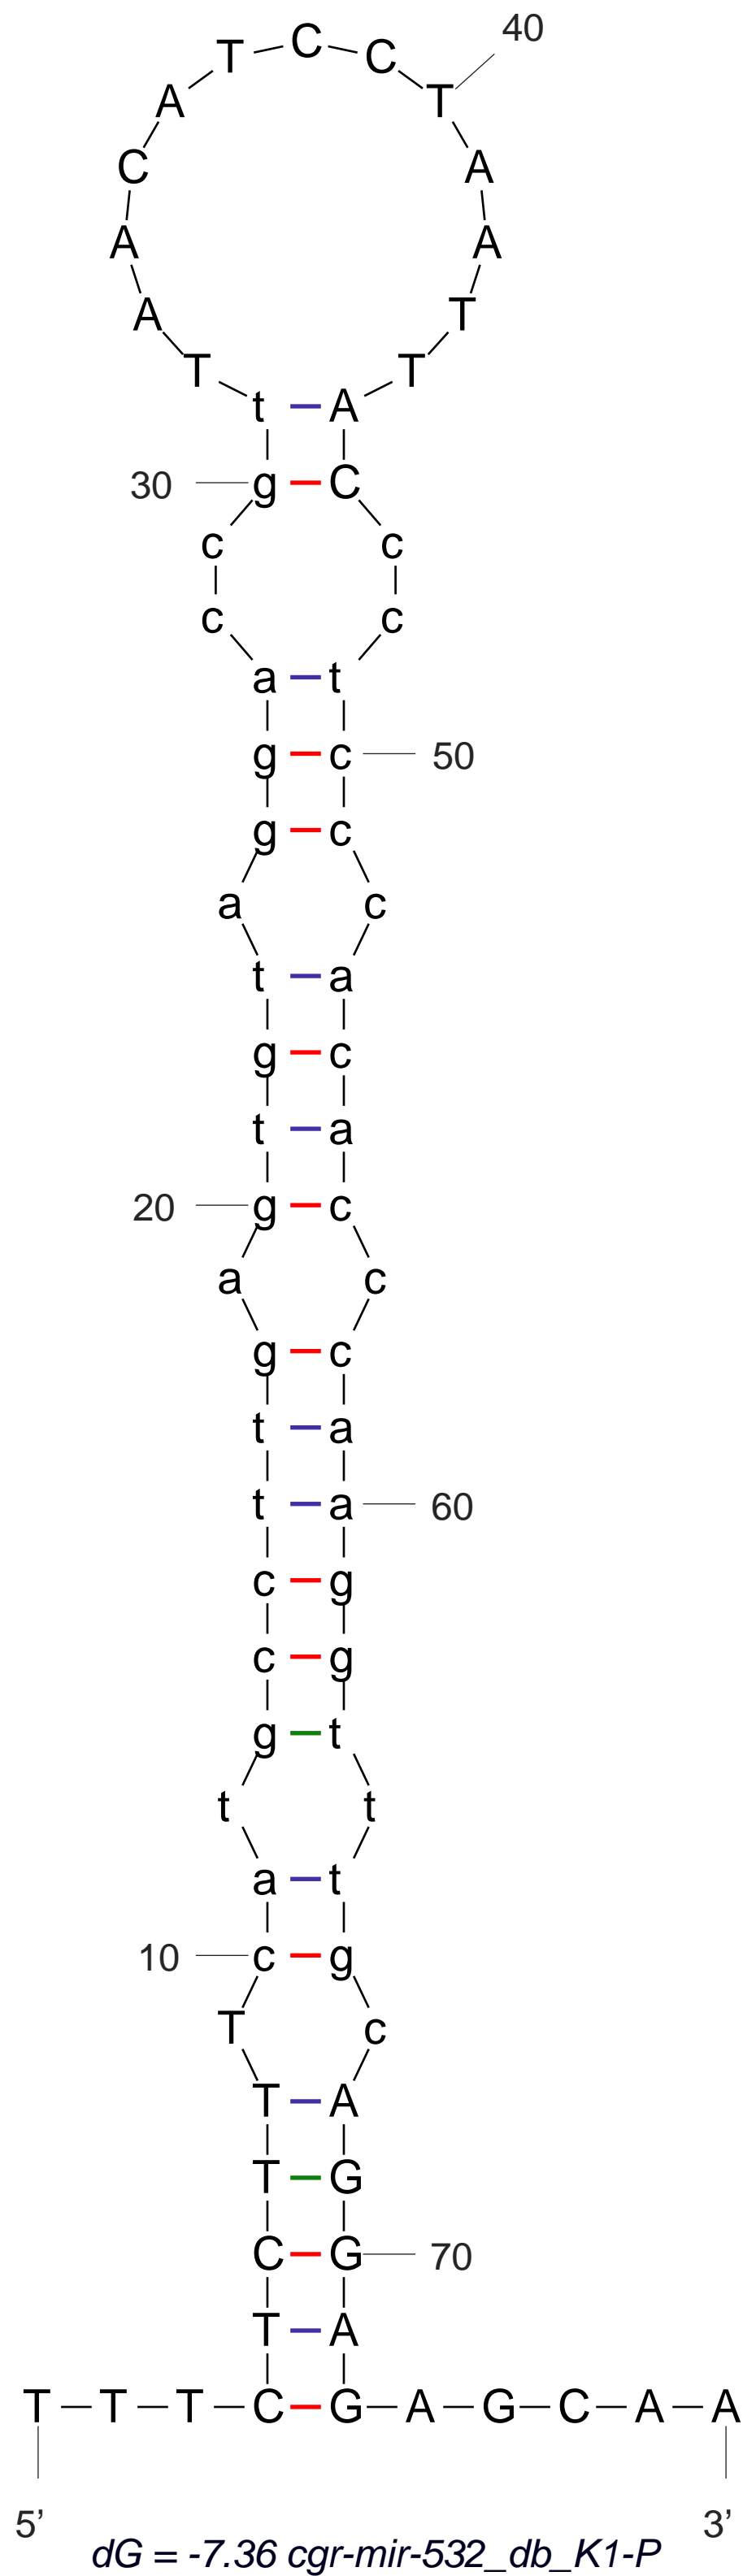

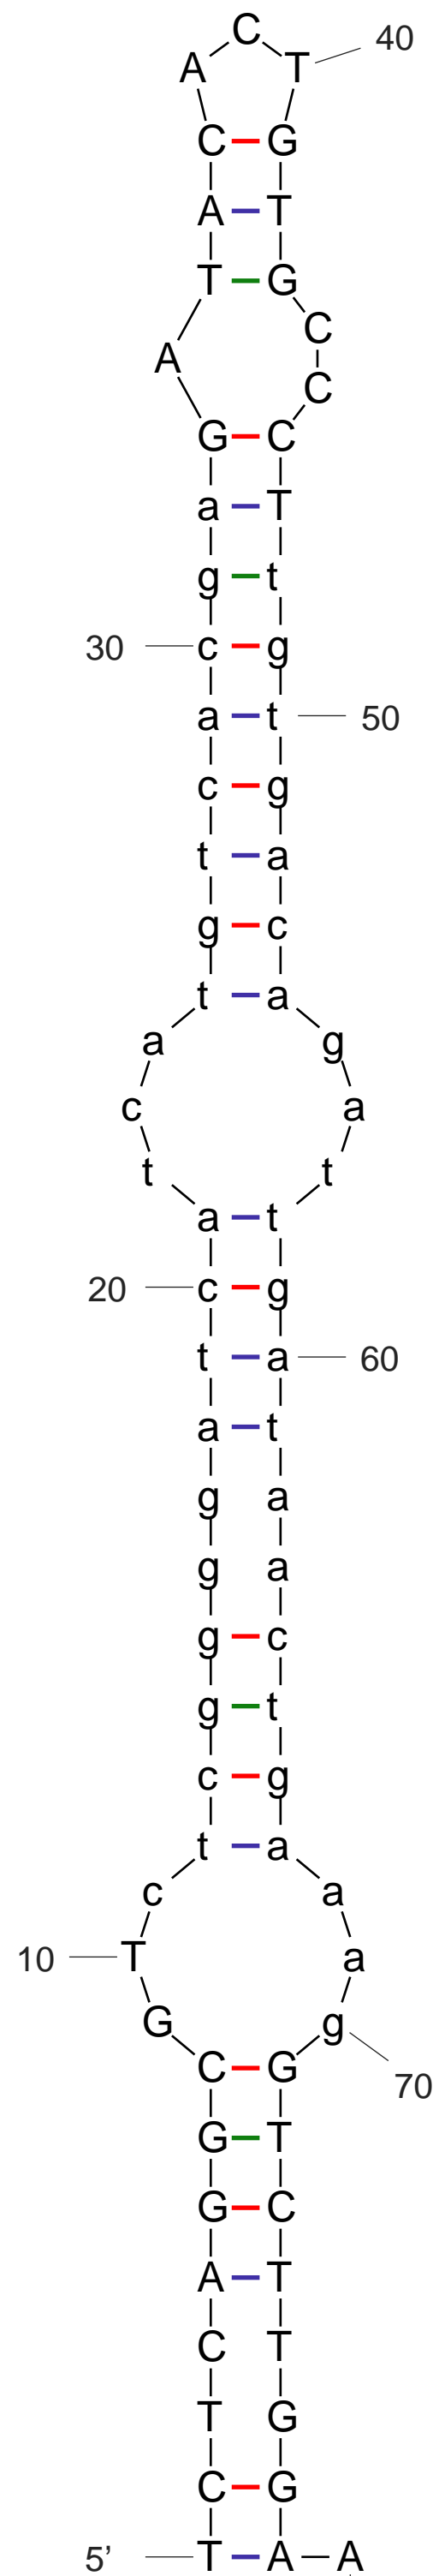

dG = -27.4 cgr-mir-542

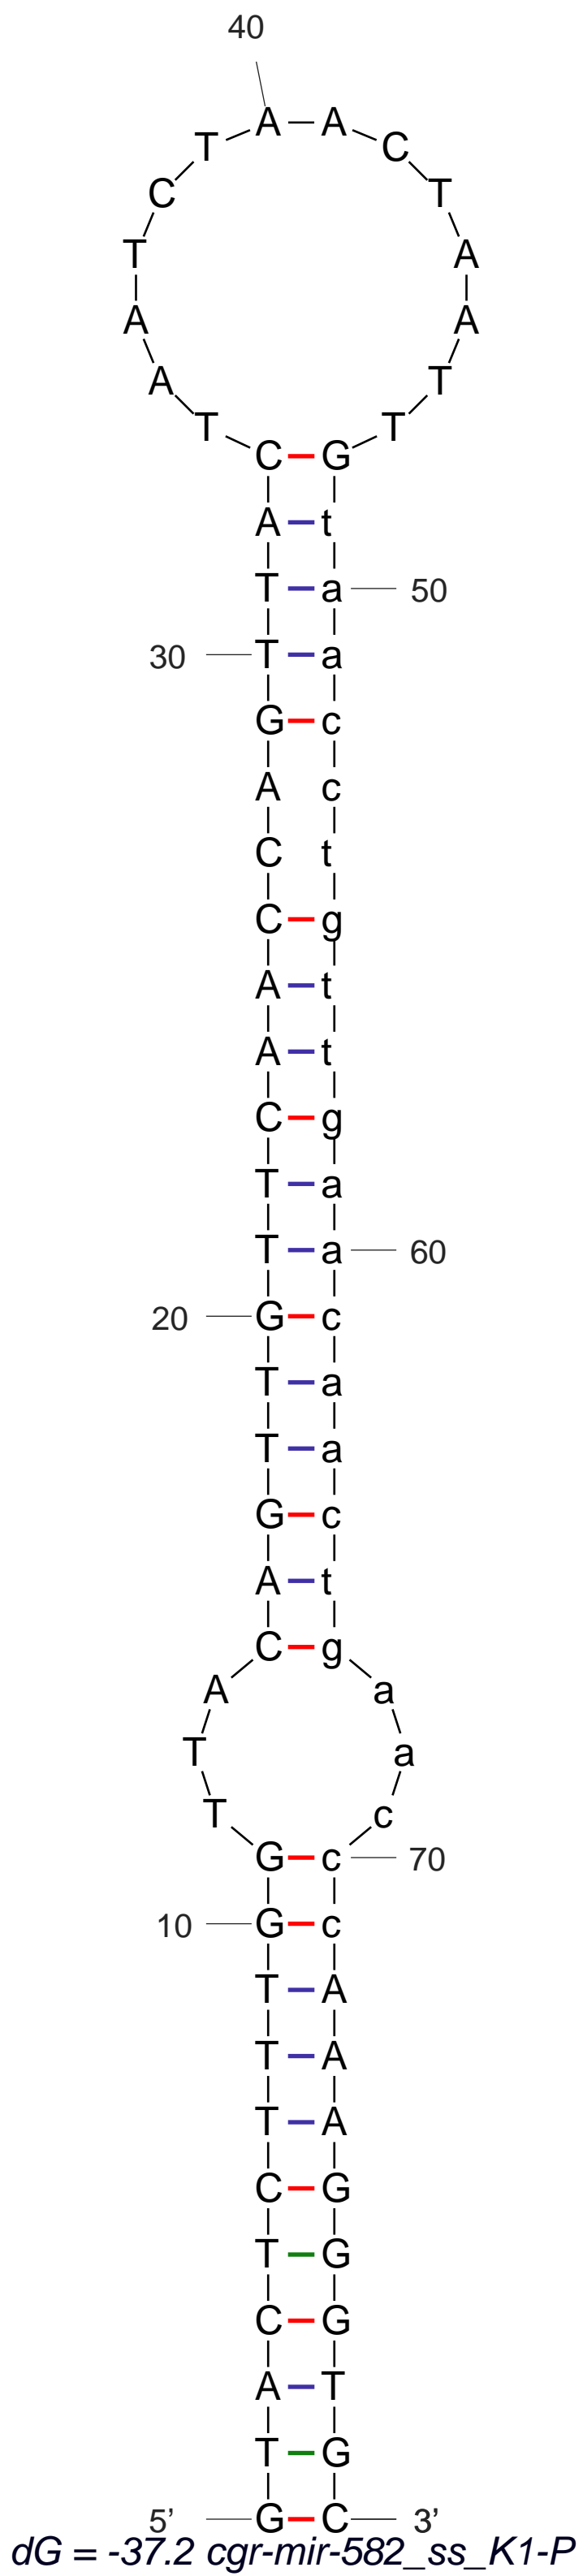



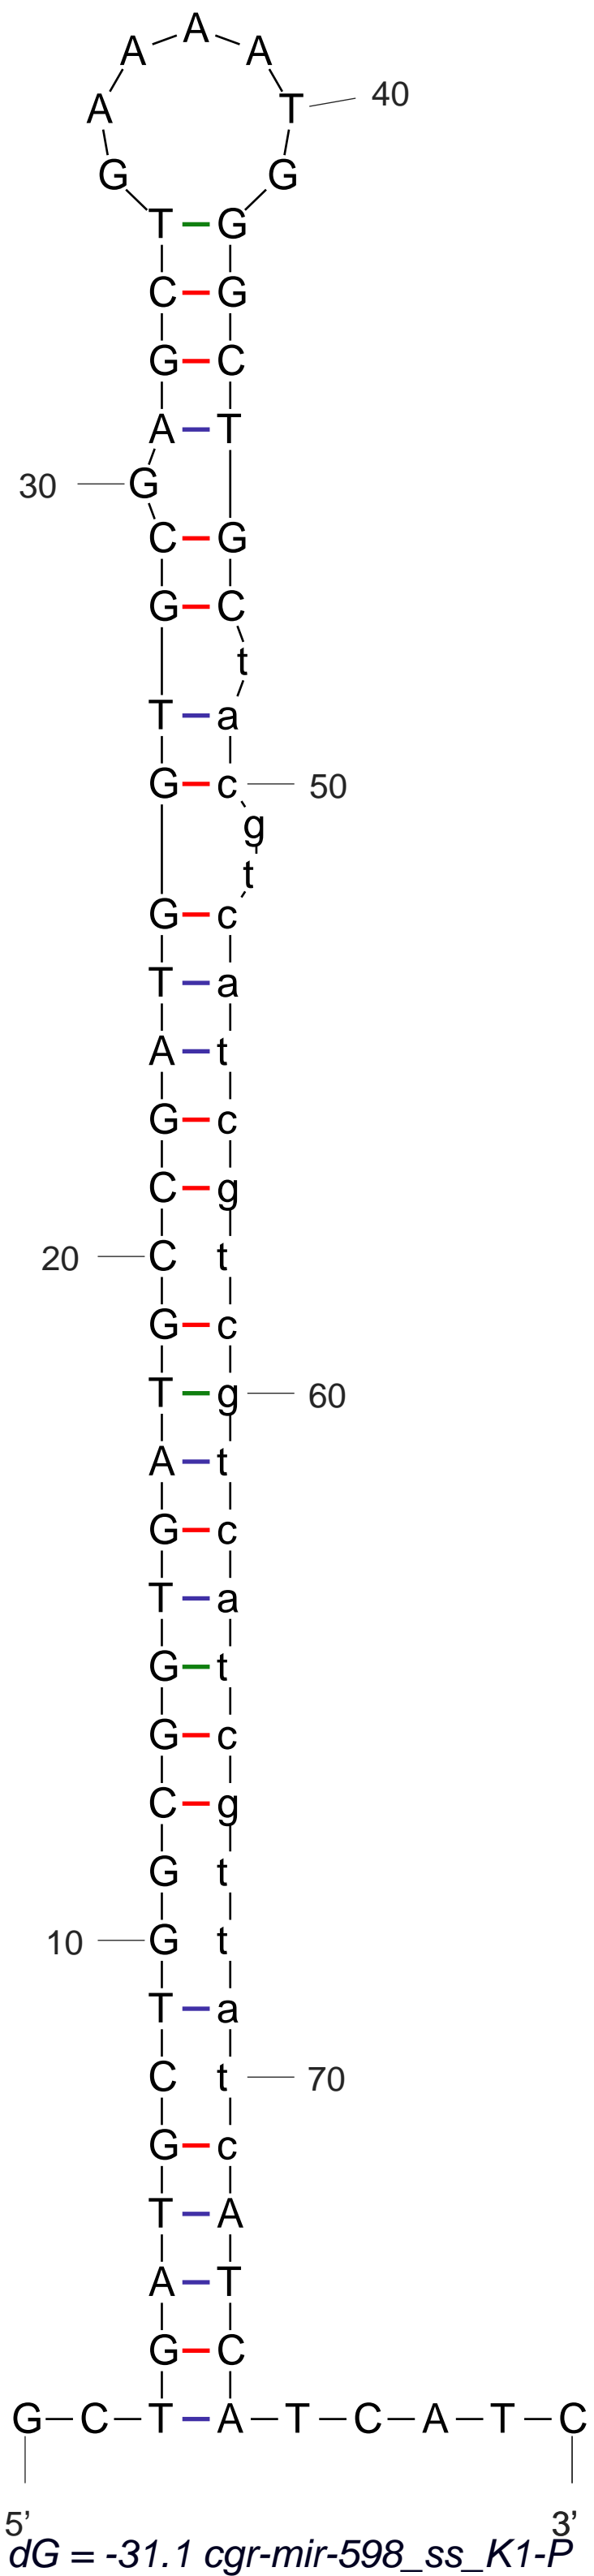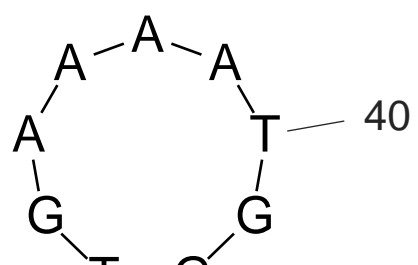

30

50

20

60

10

70

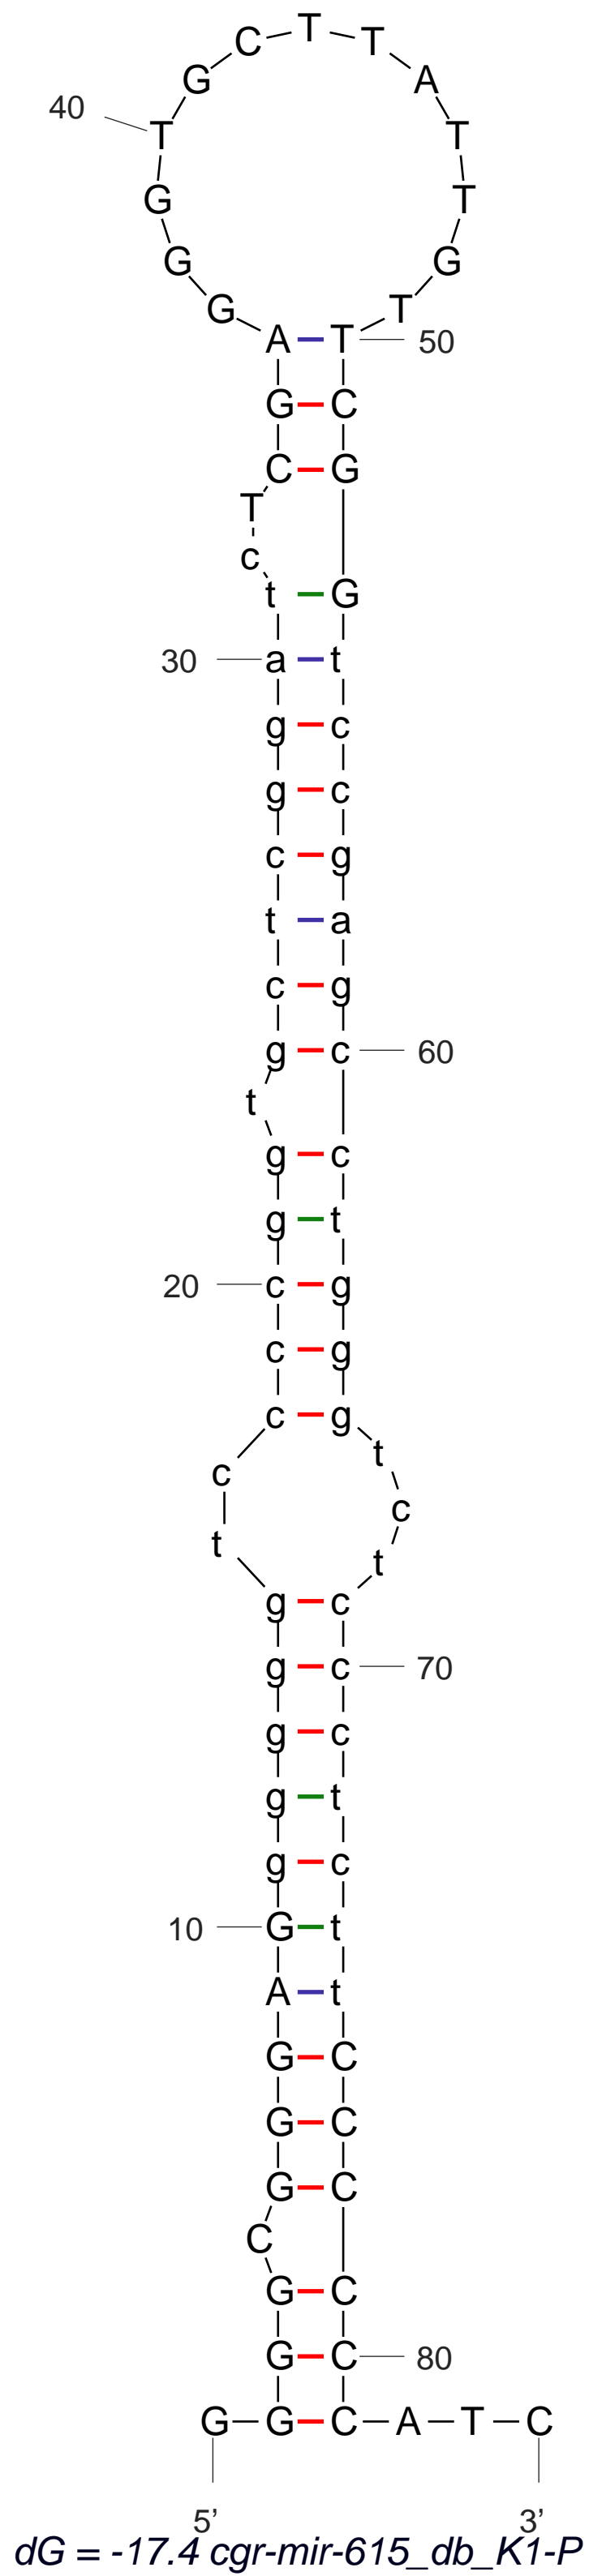

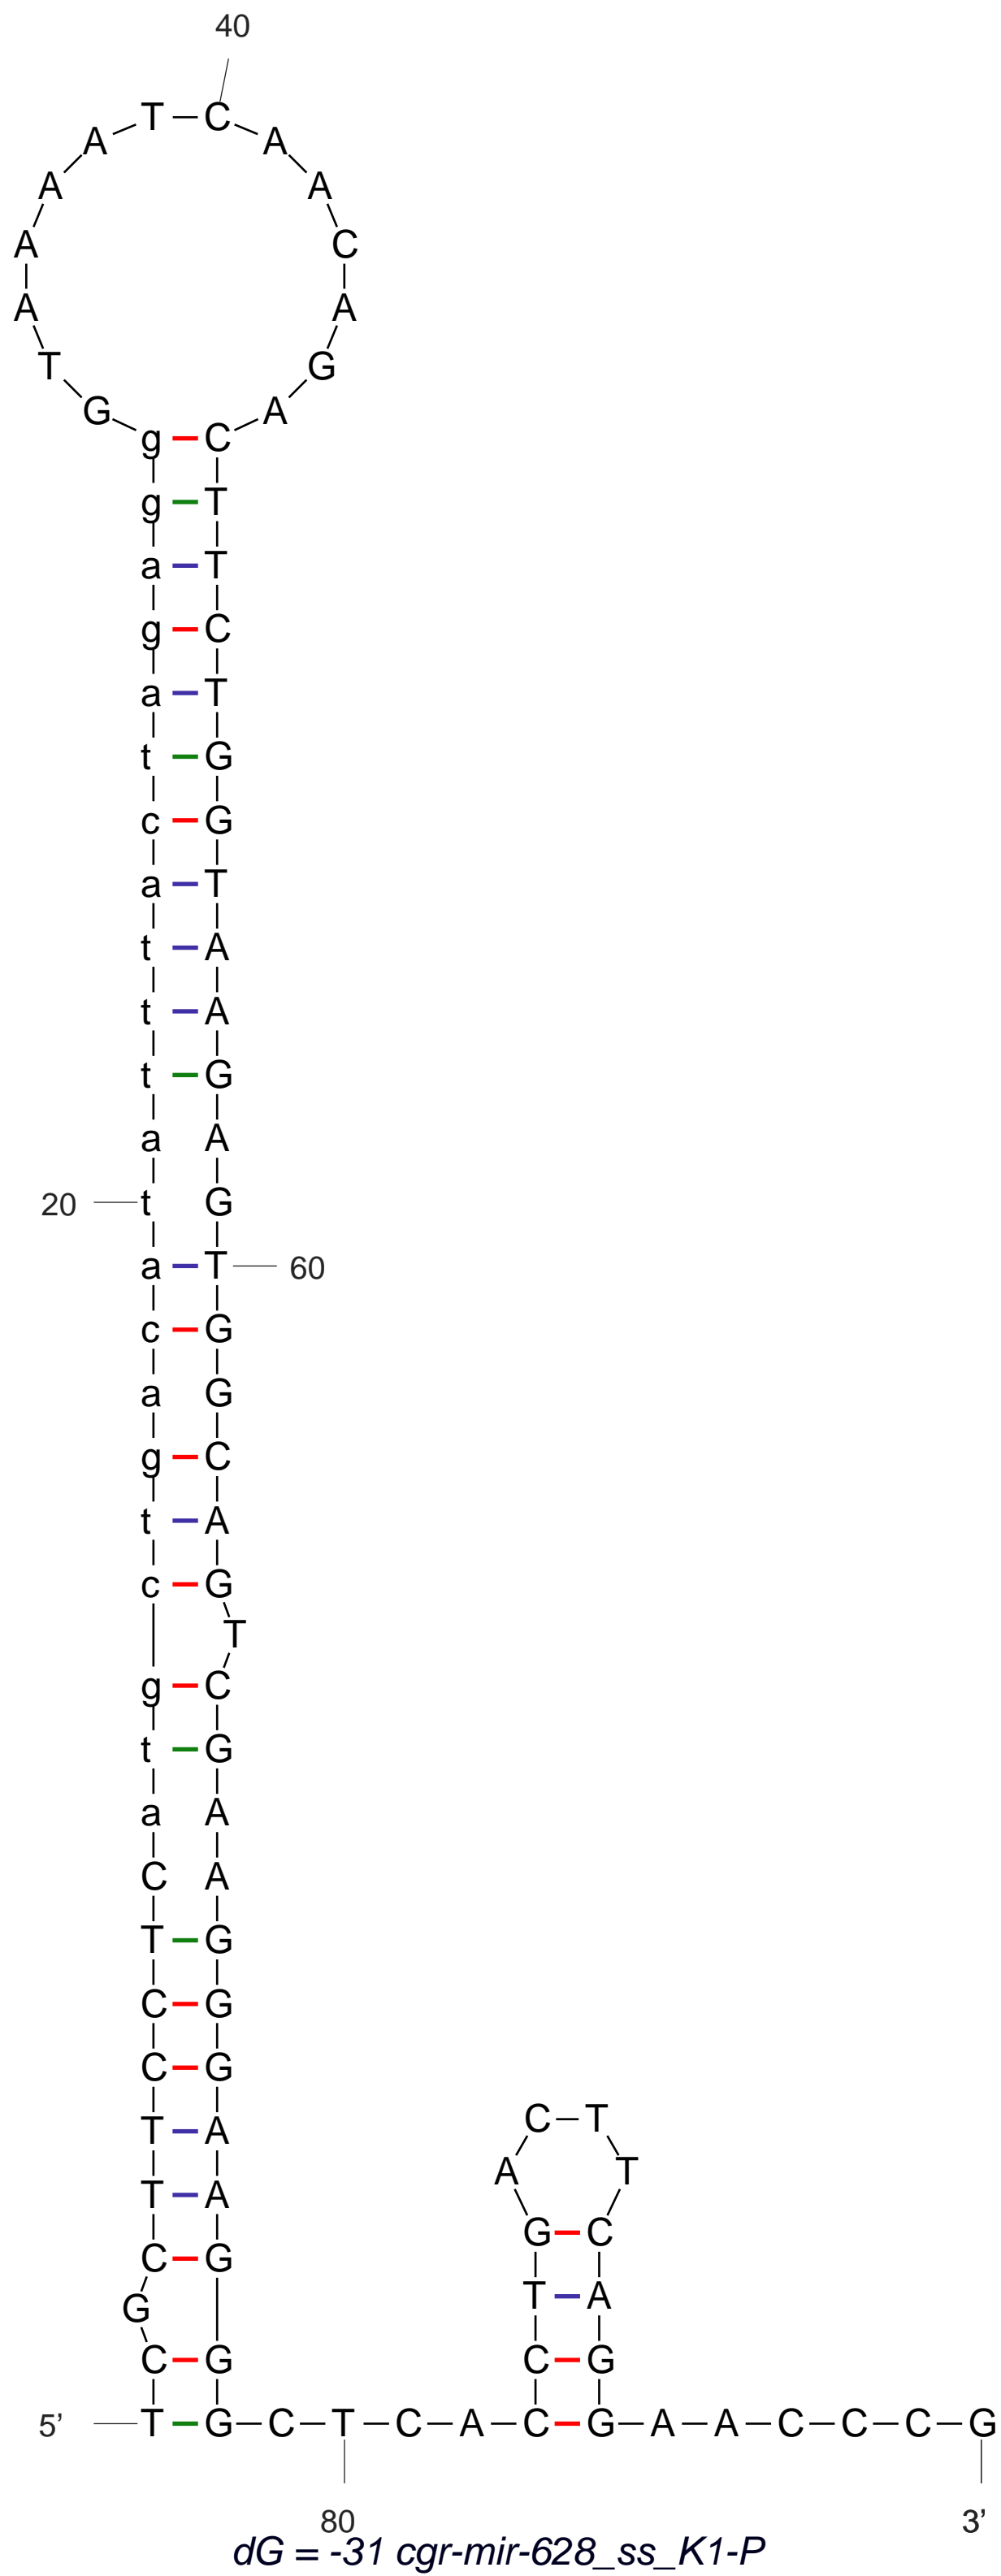



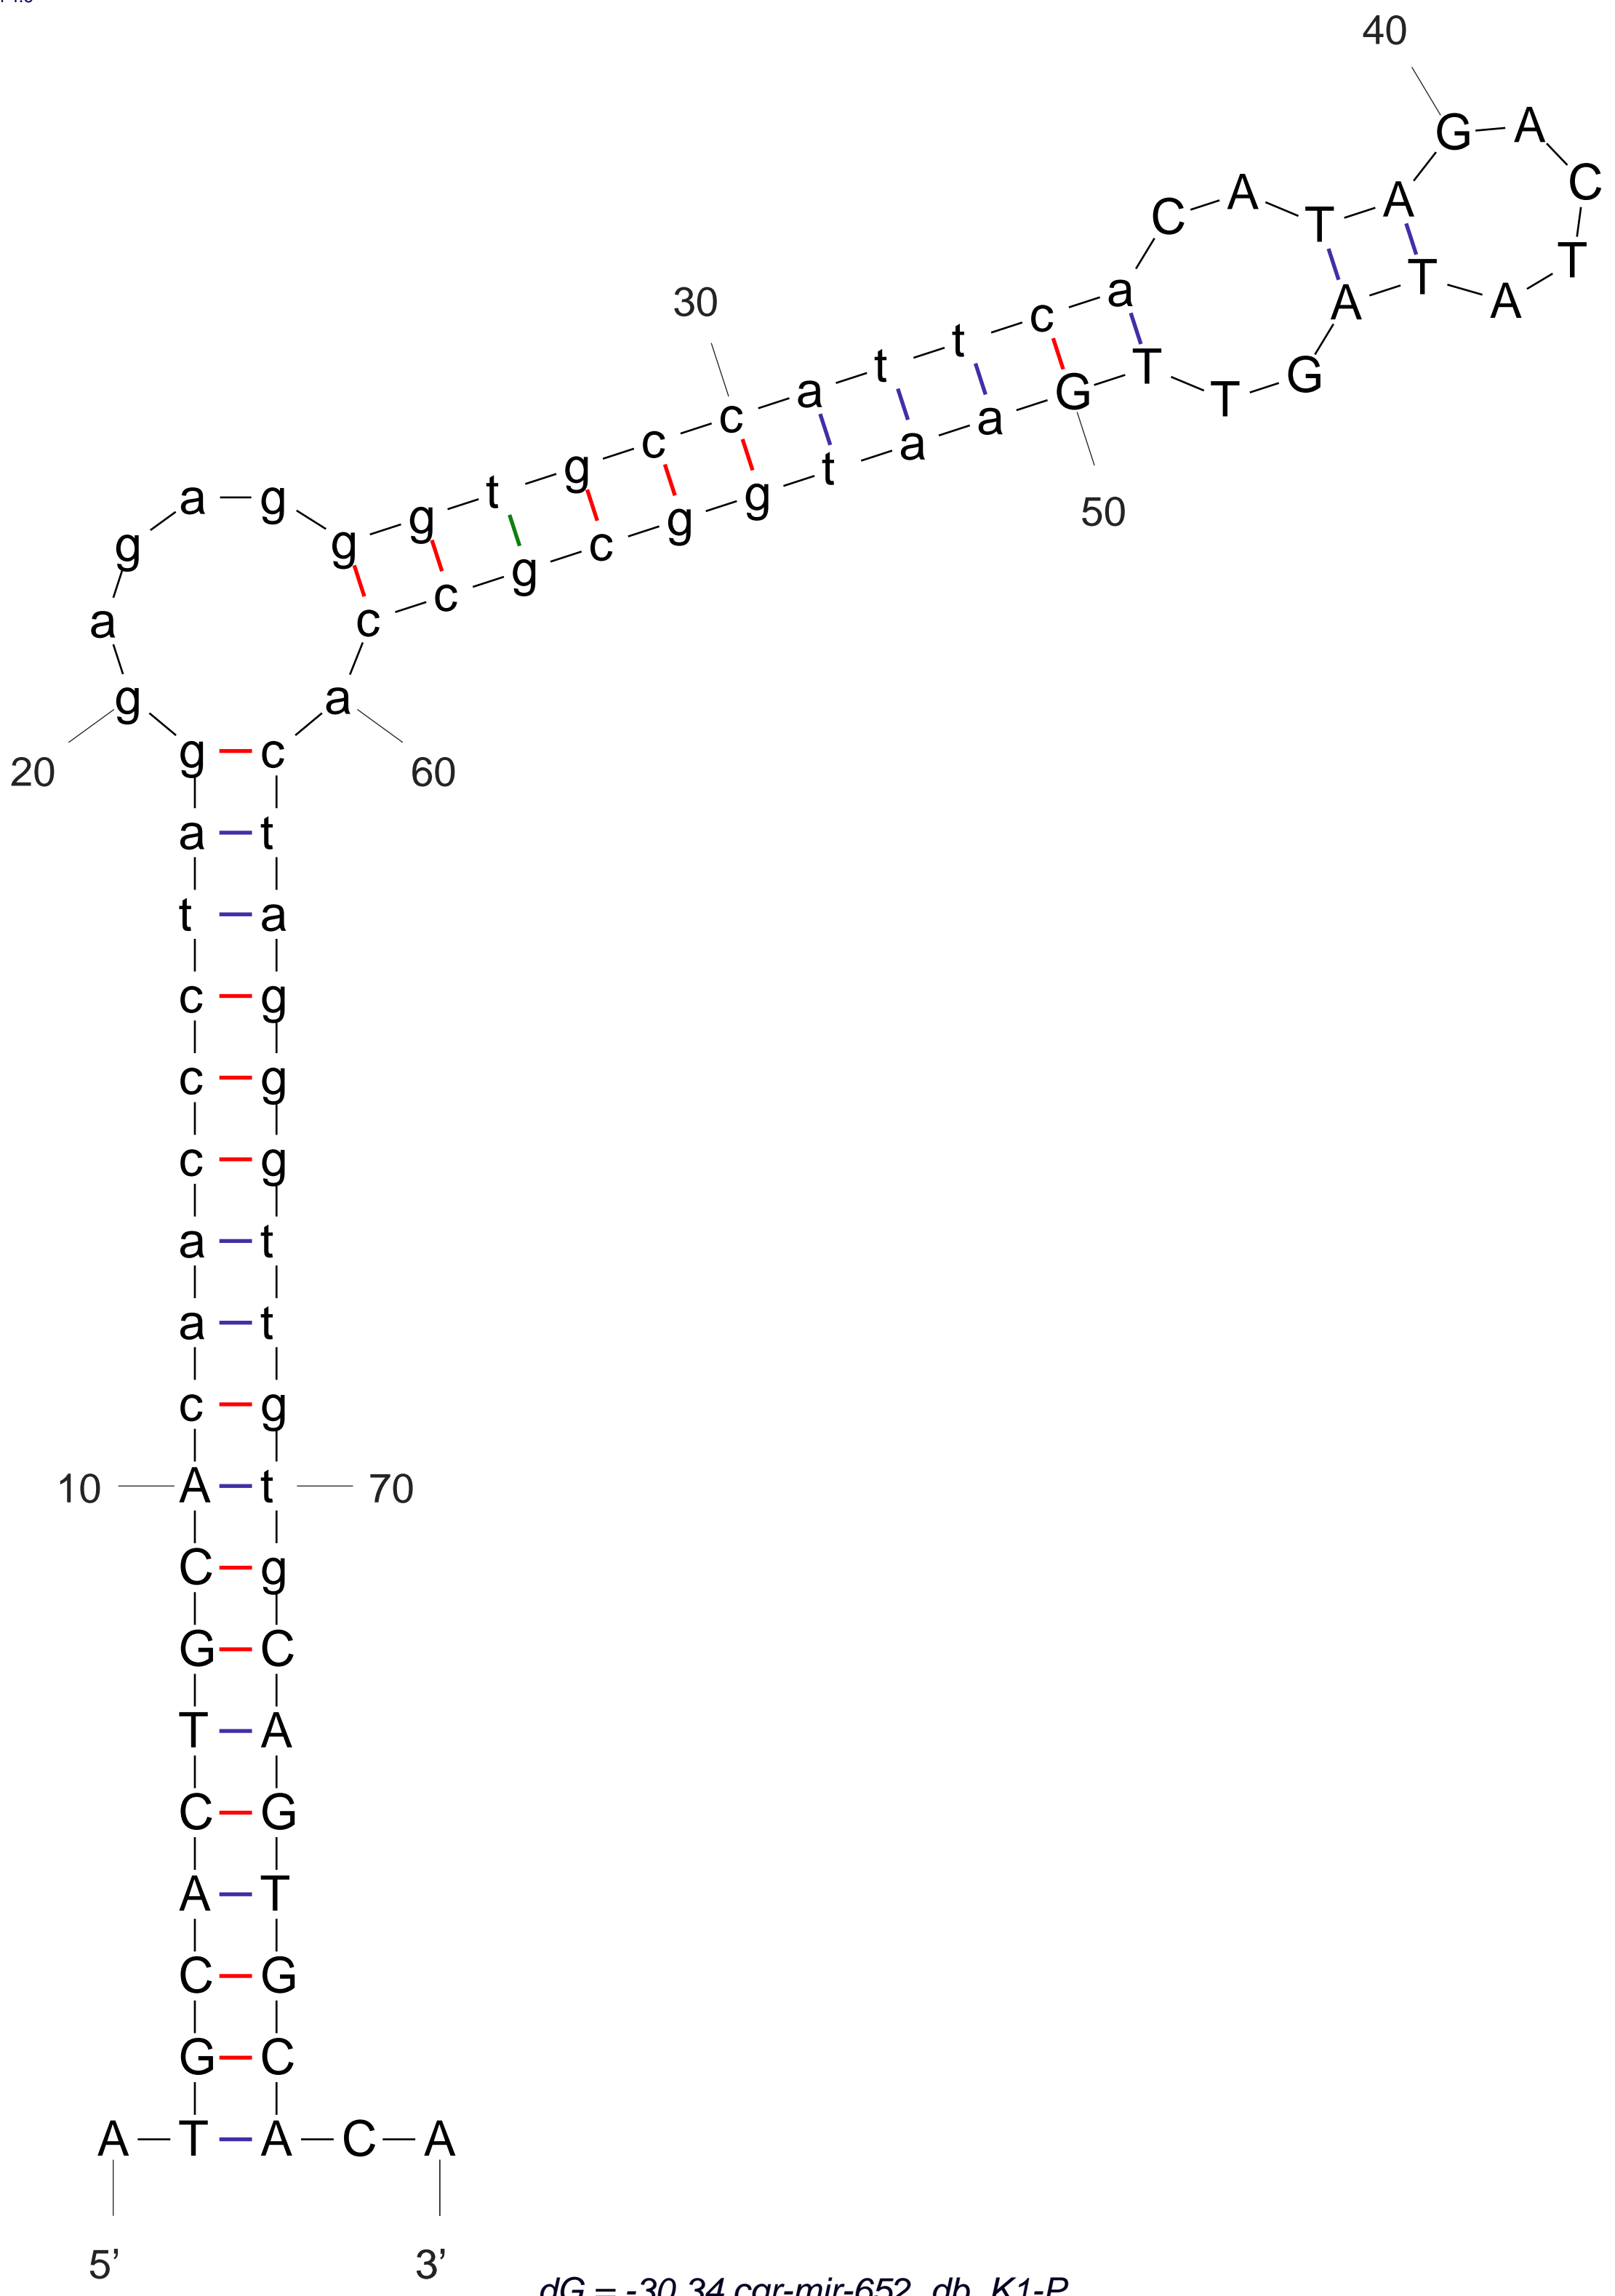

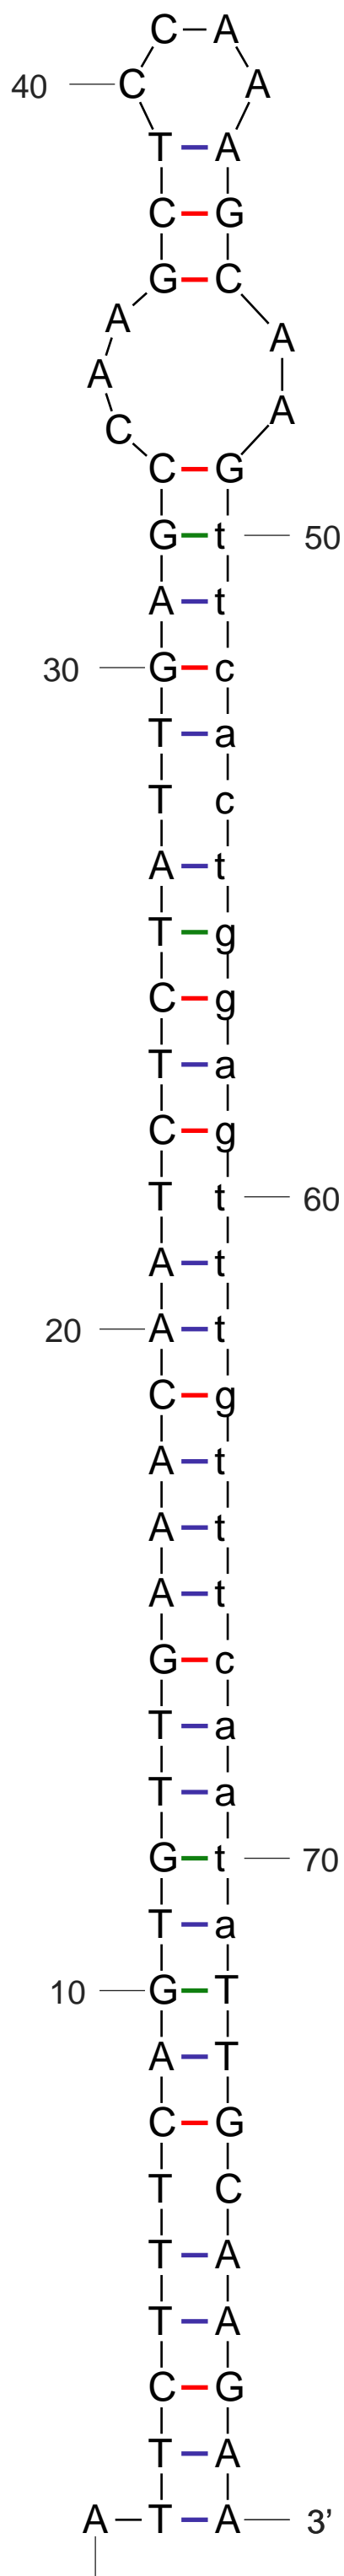

$dG = -34.2$  *cgr-mir-653\_ss\_K1-P*

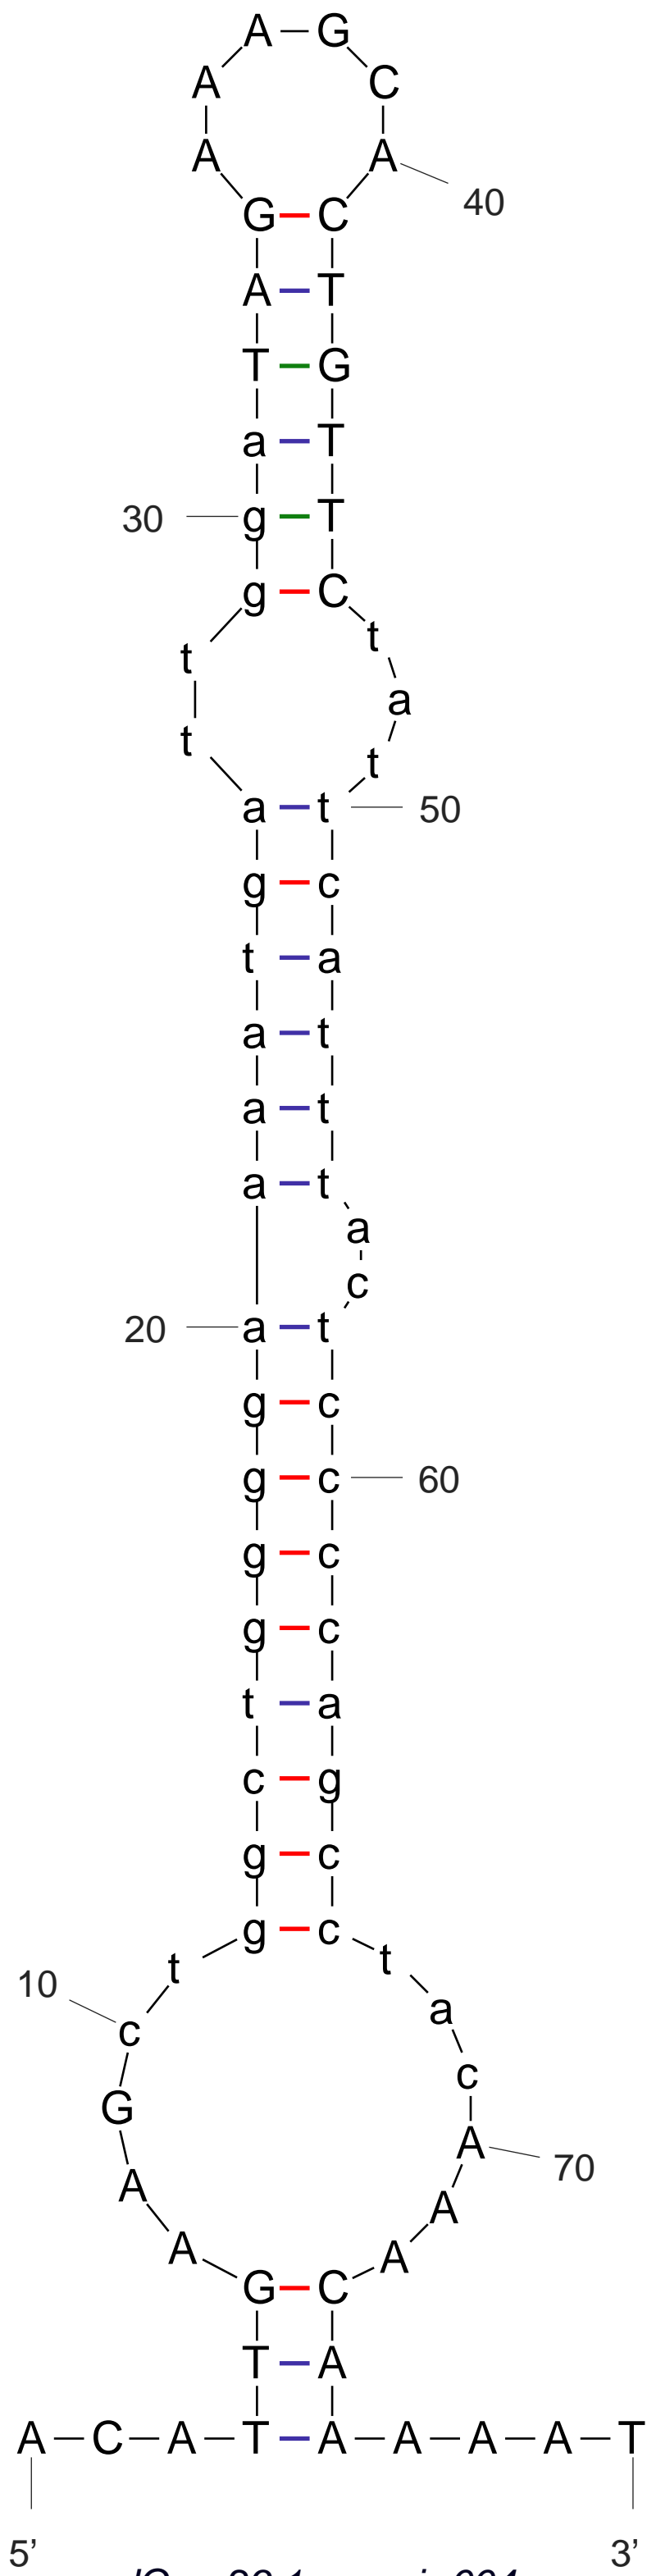

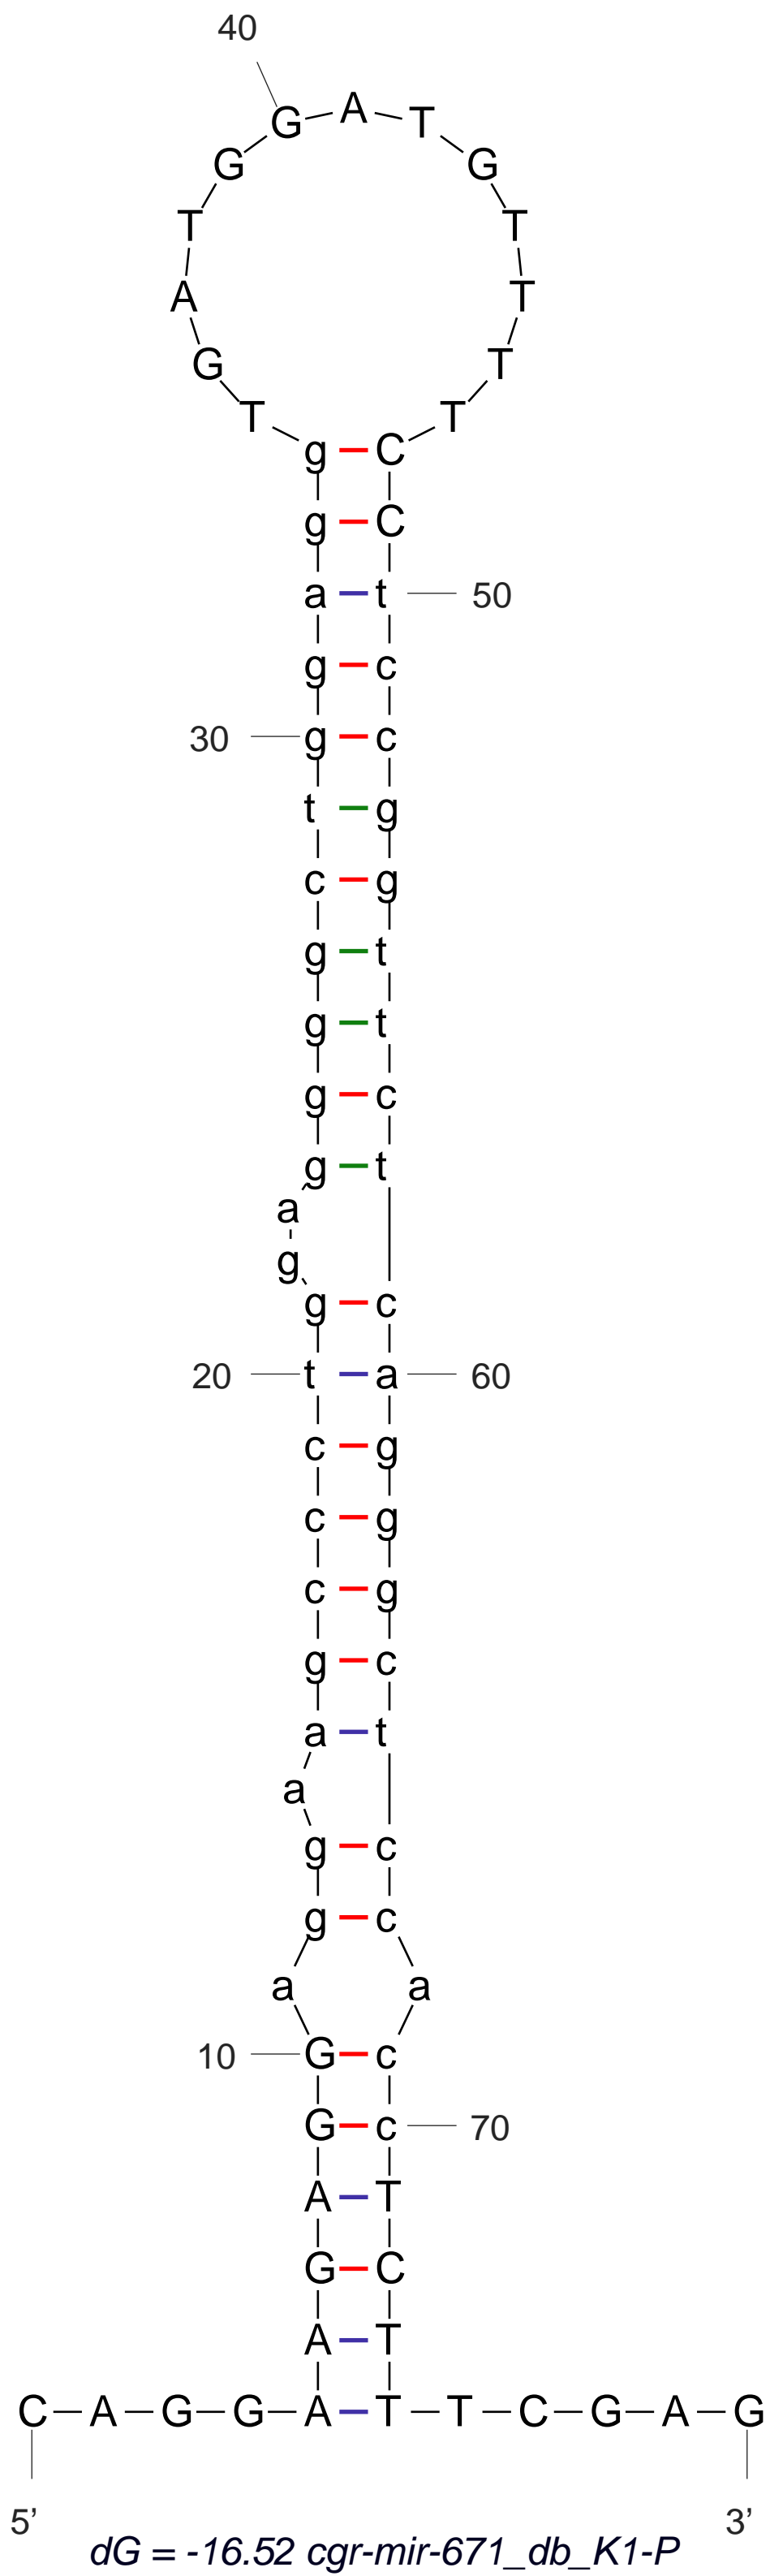



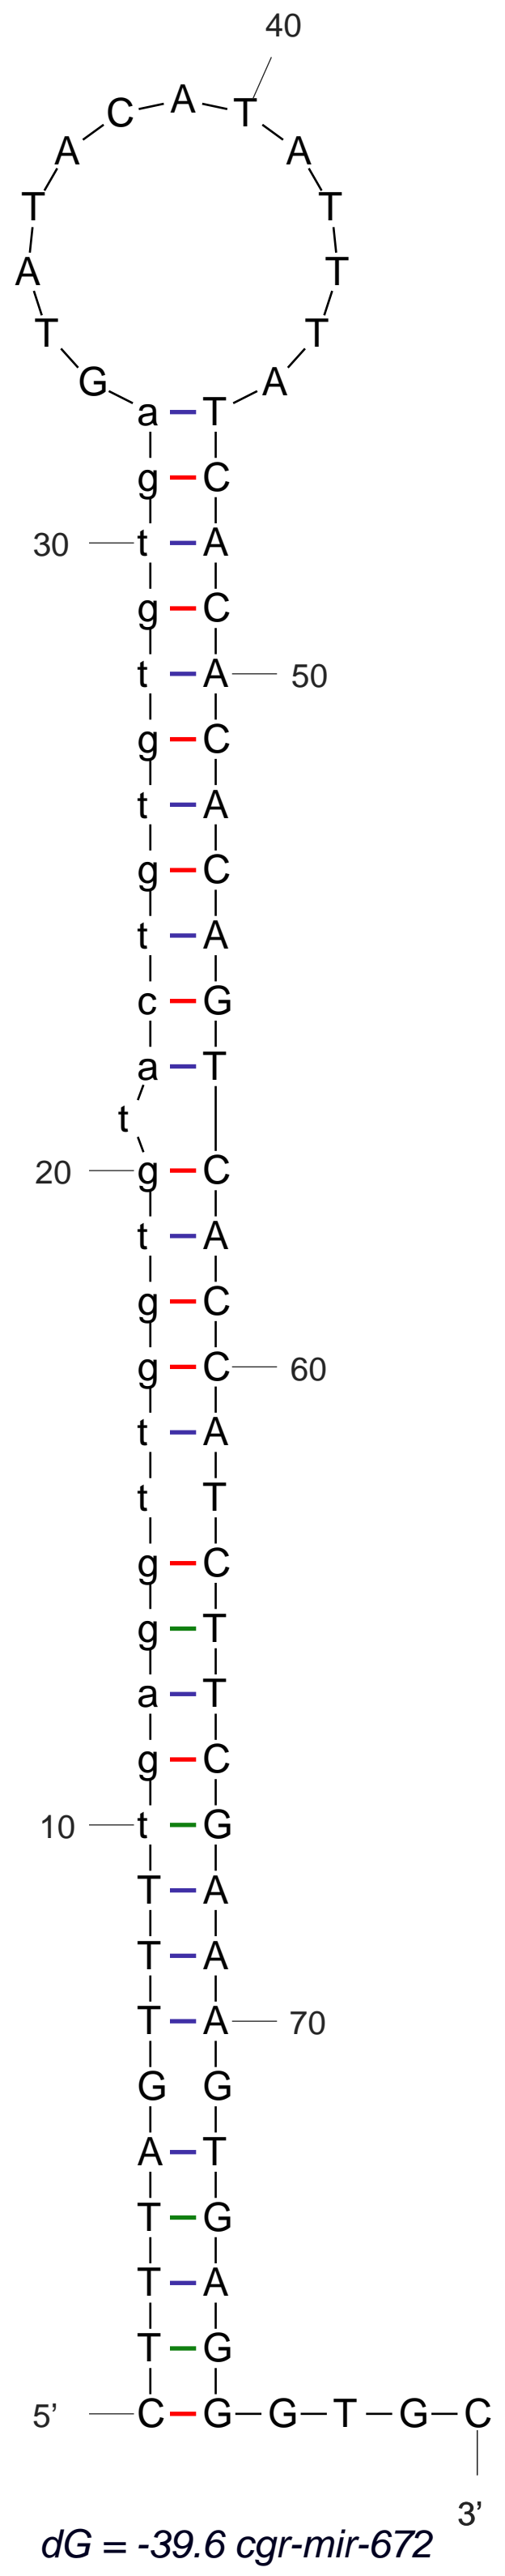

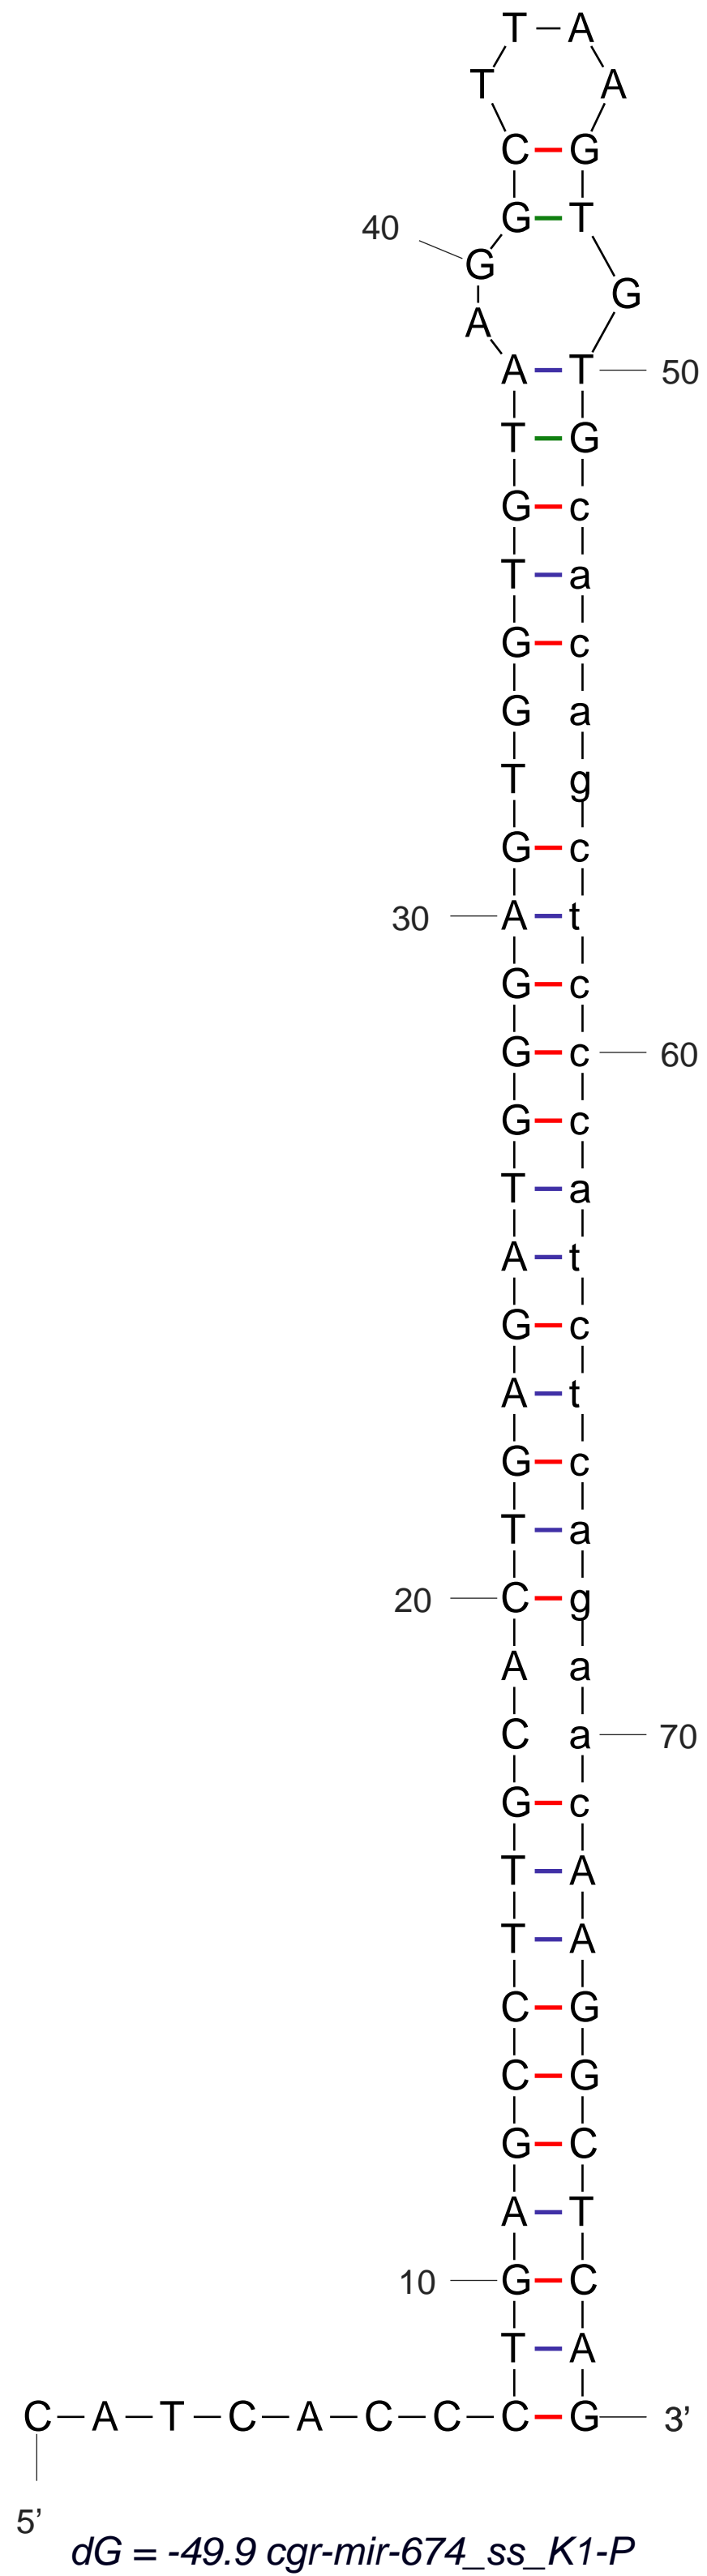

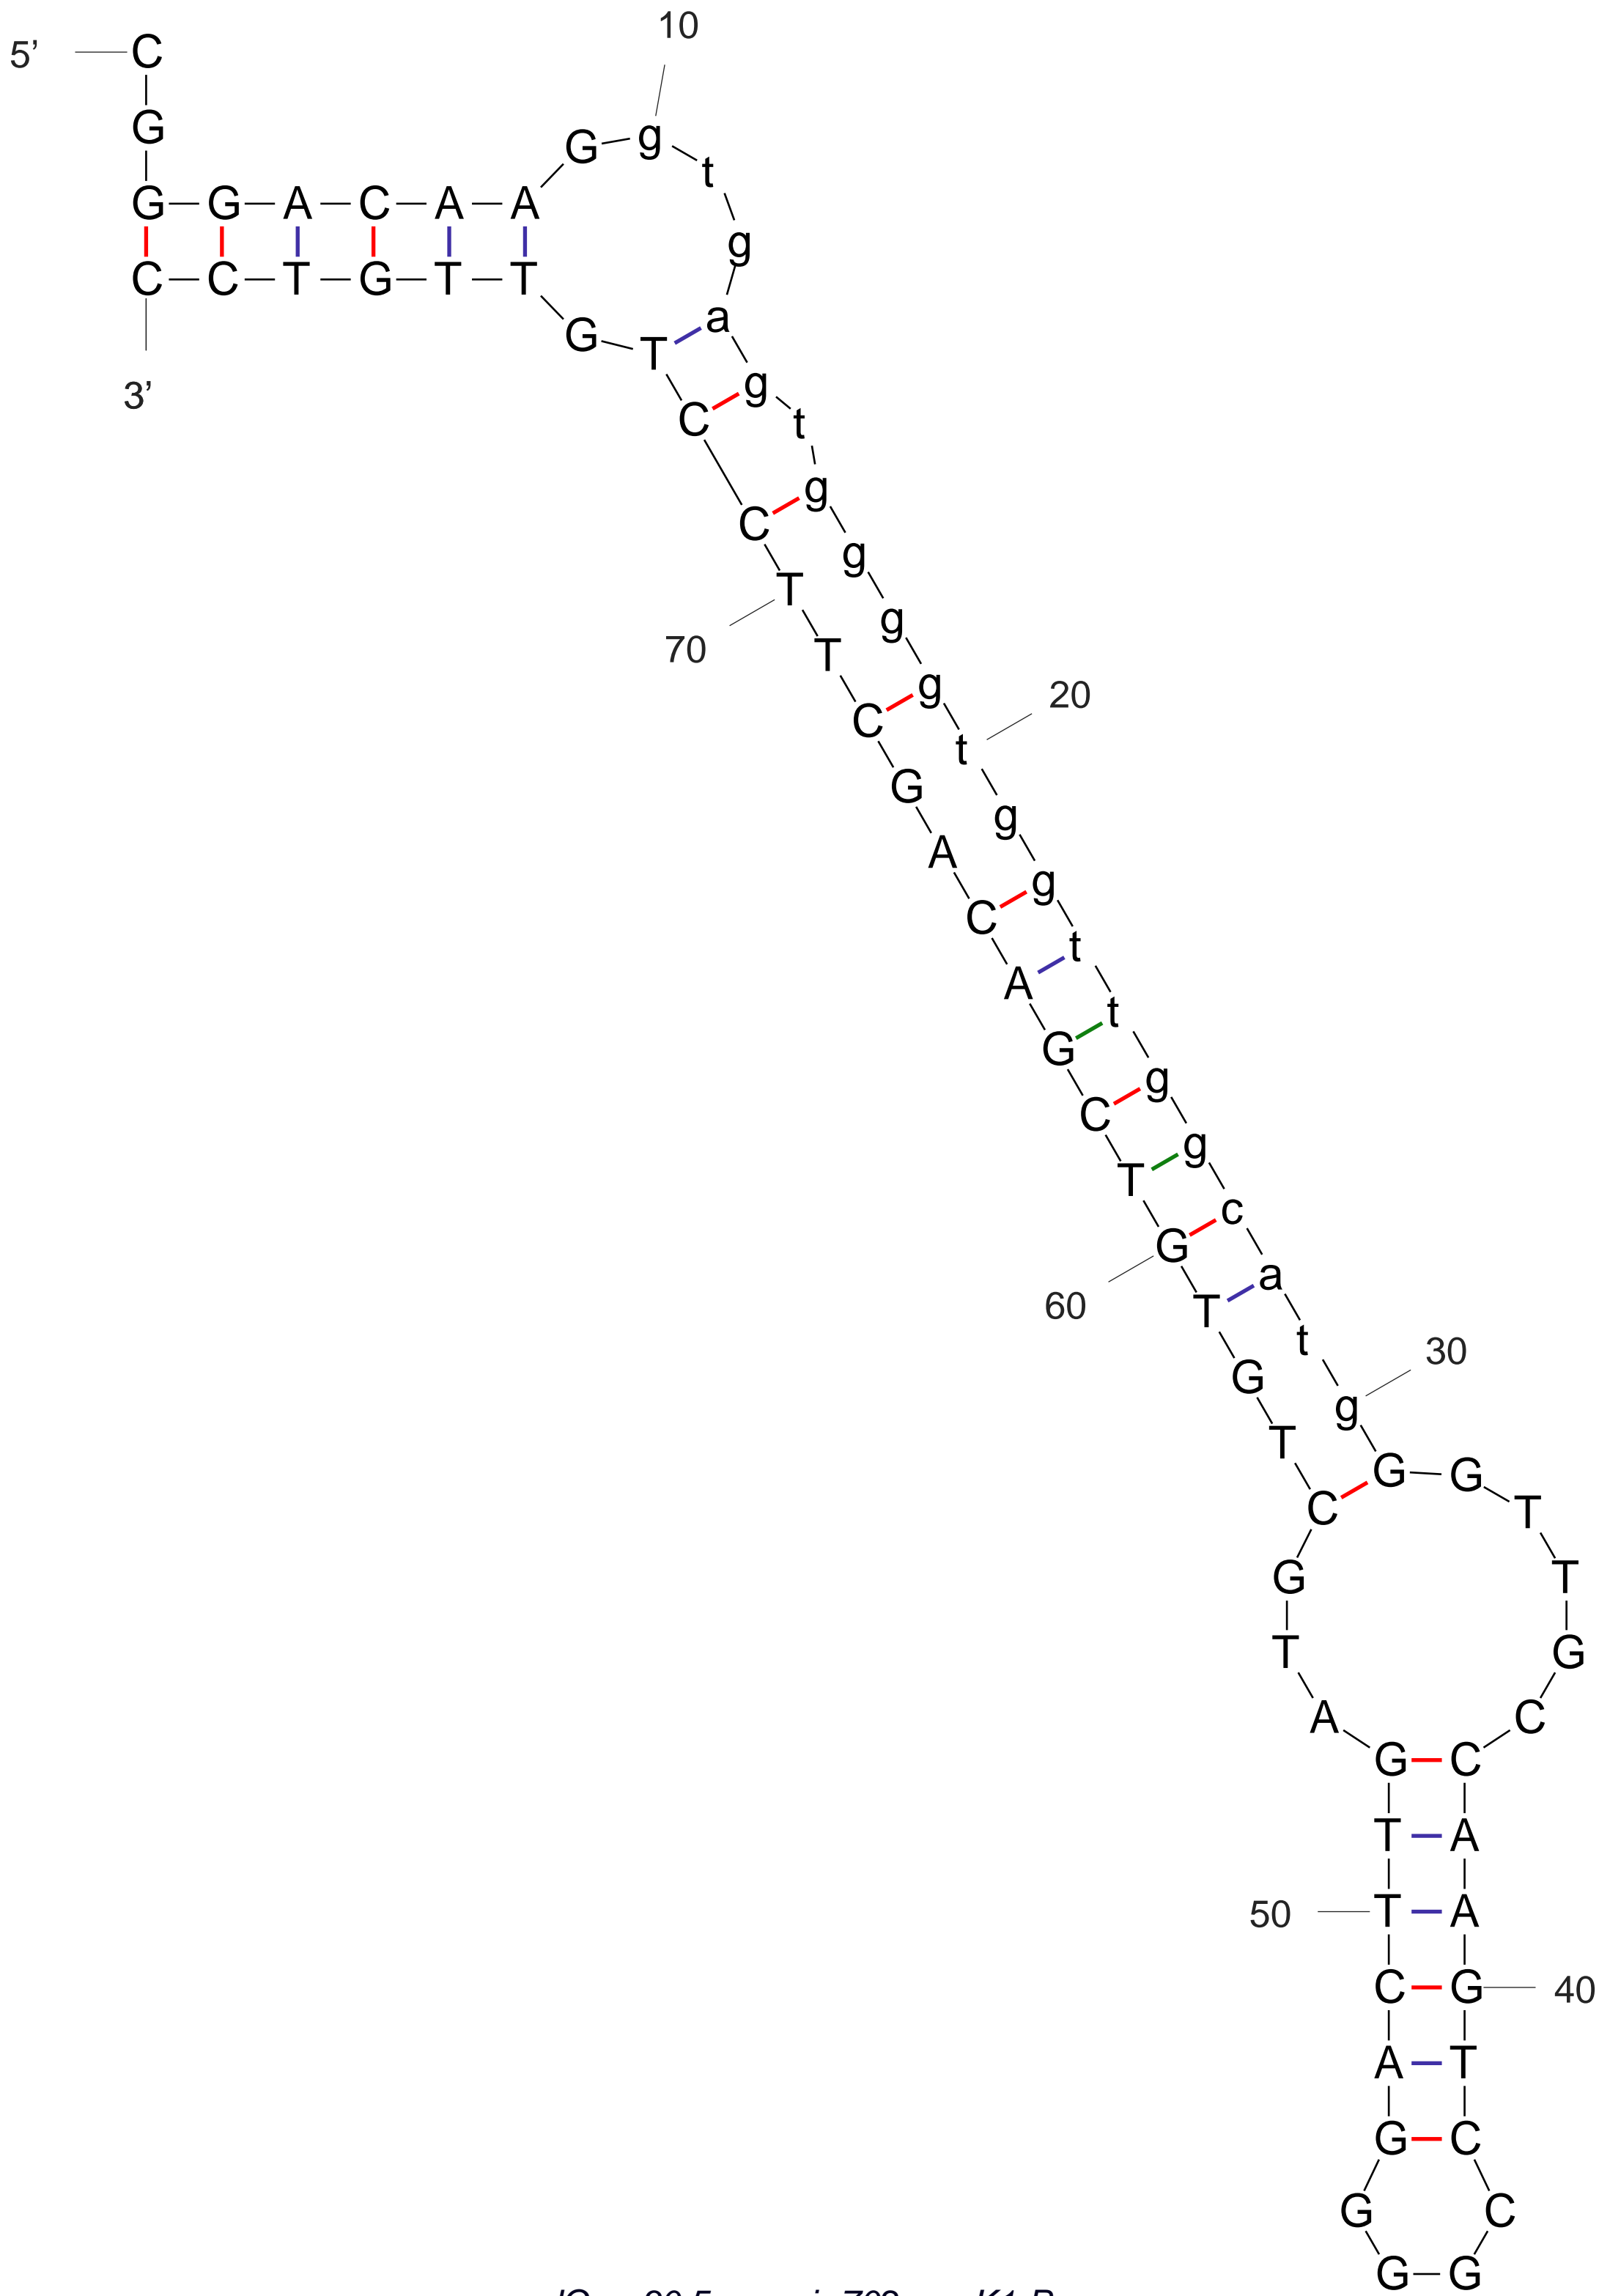

$dG = -30.5$  *cgr-mir-702\_ss\_K1-P*

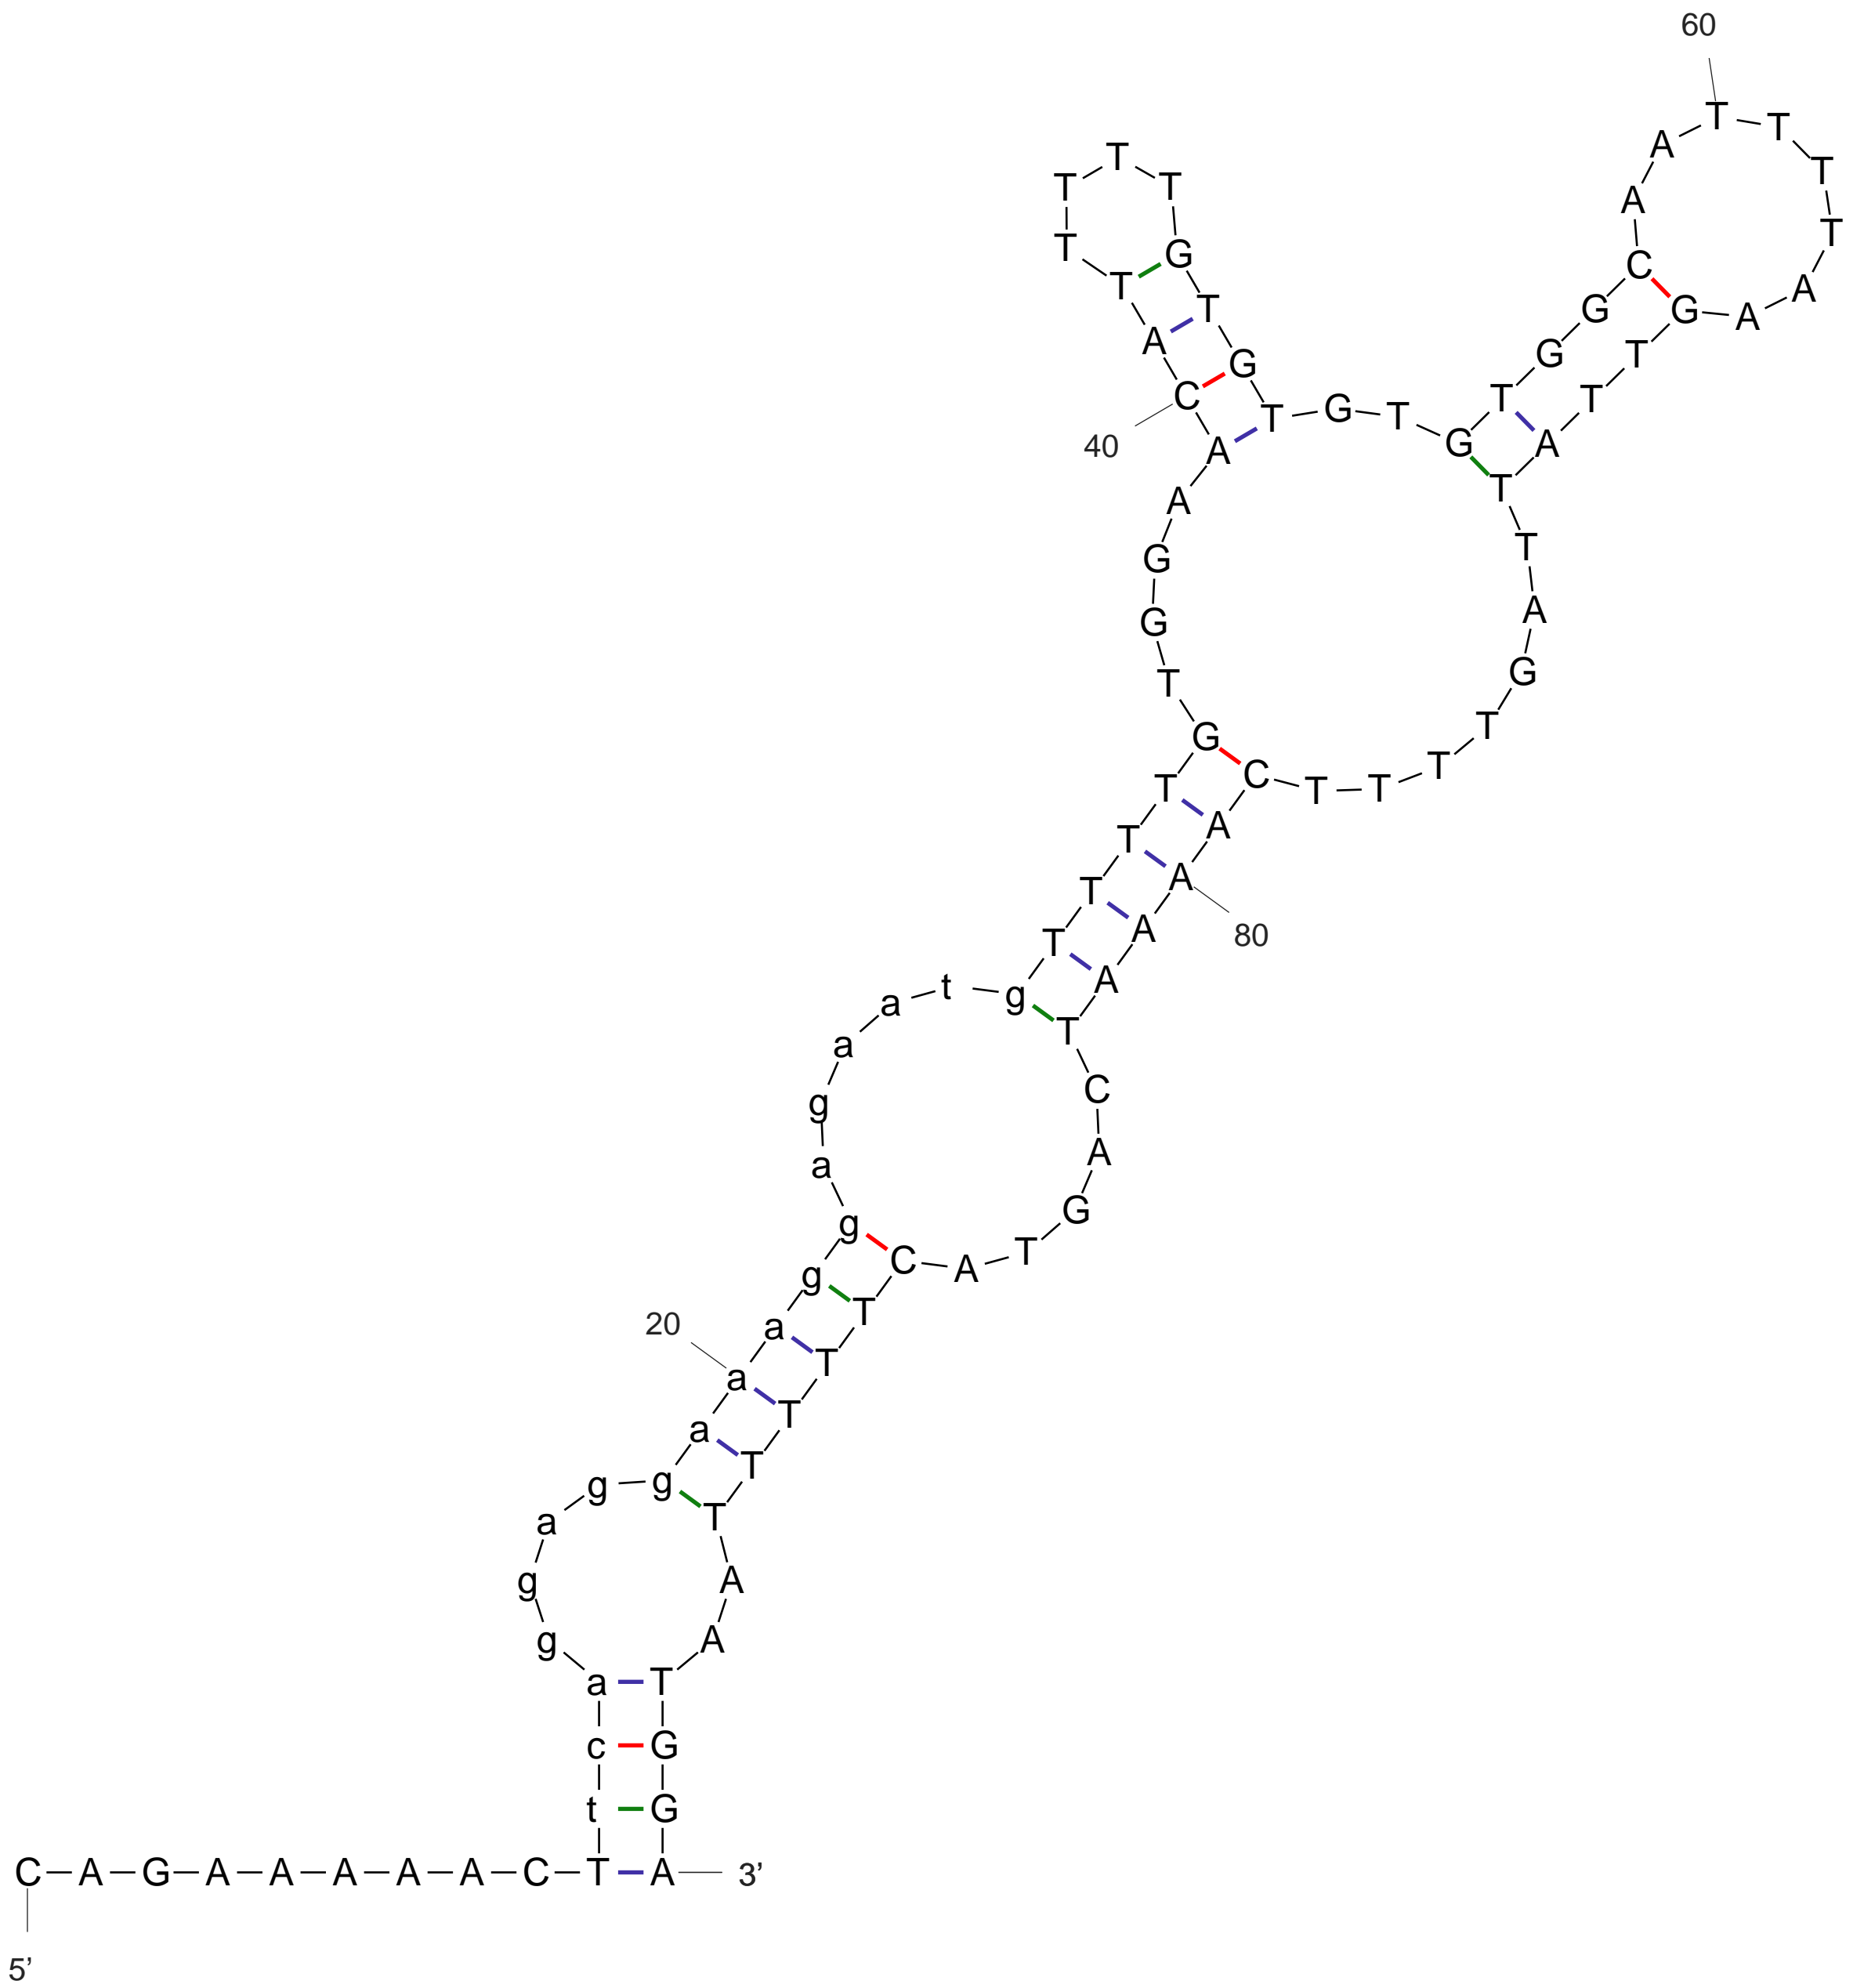

dG = -8.6 cgr-mir-703\_ss\_K1-P

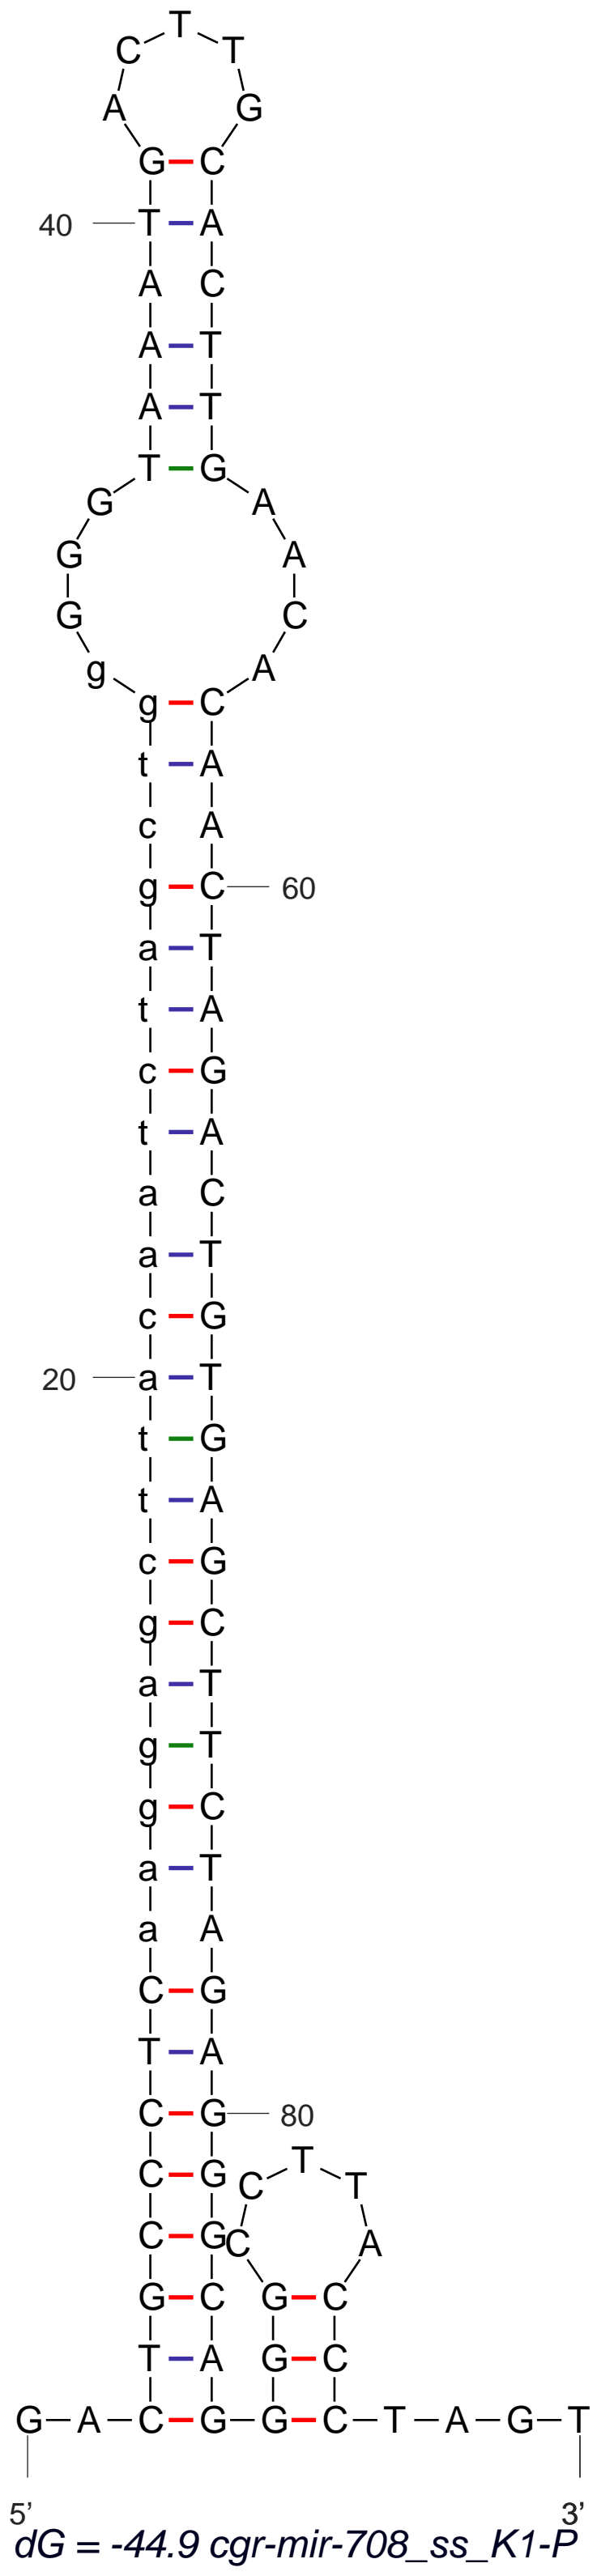

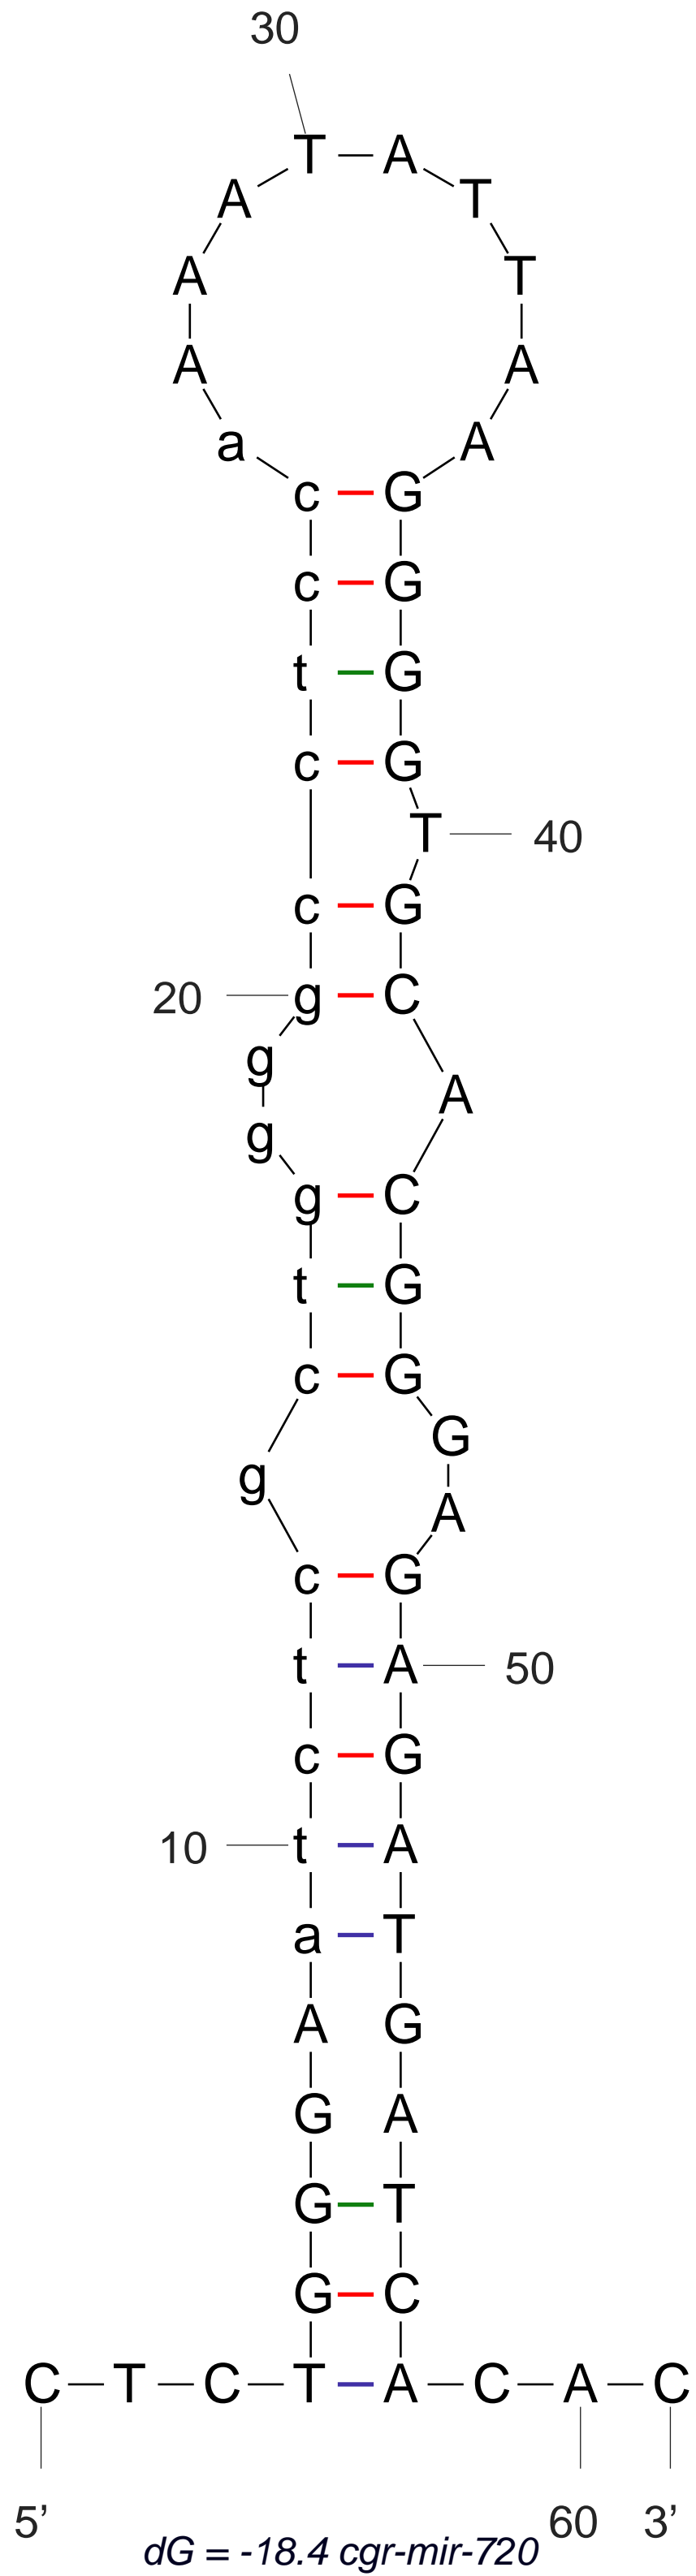

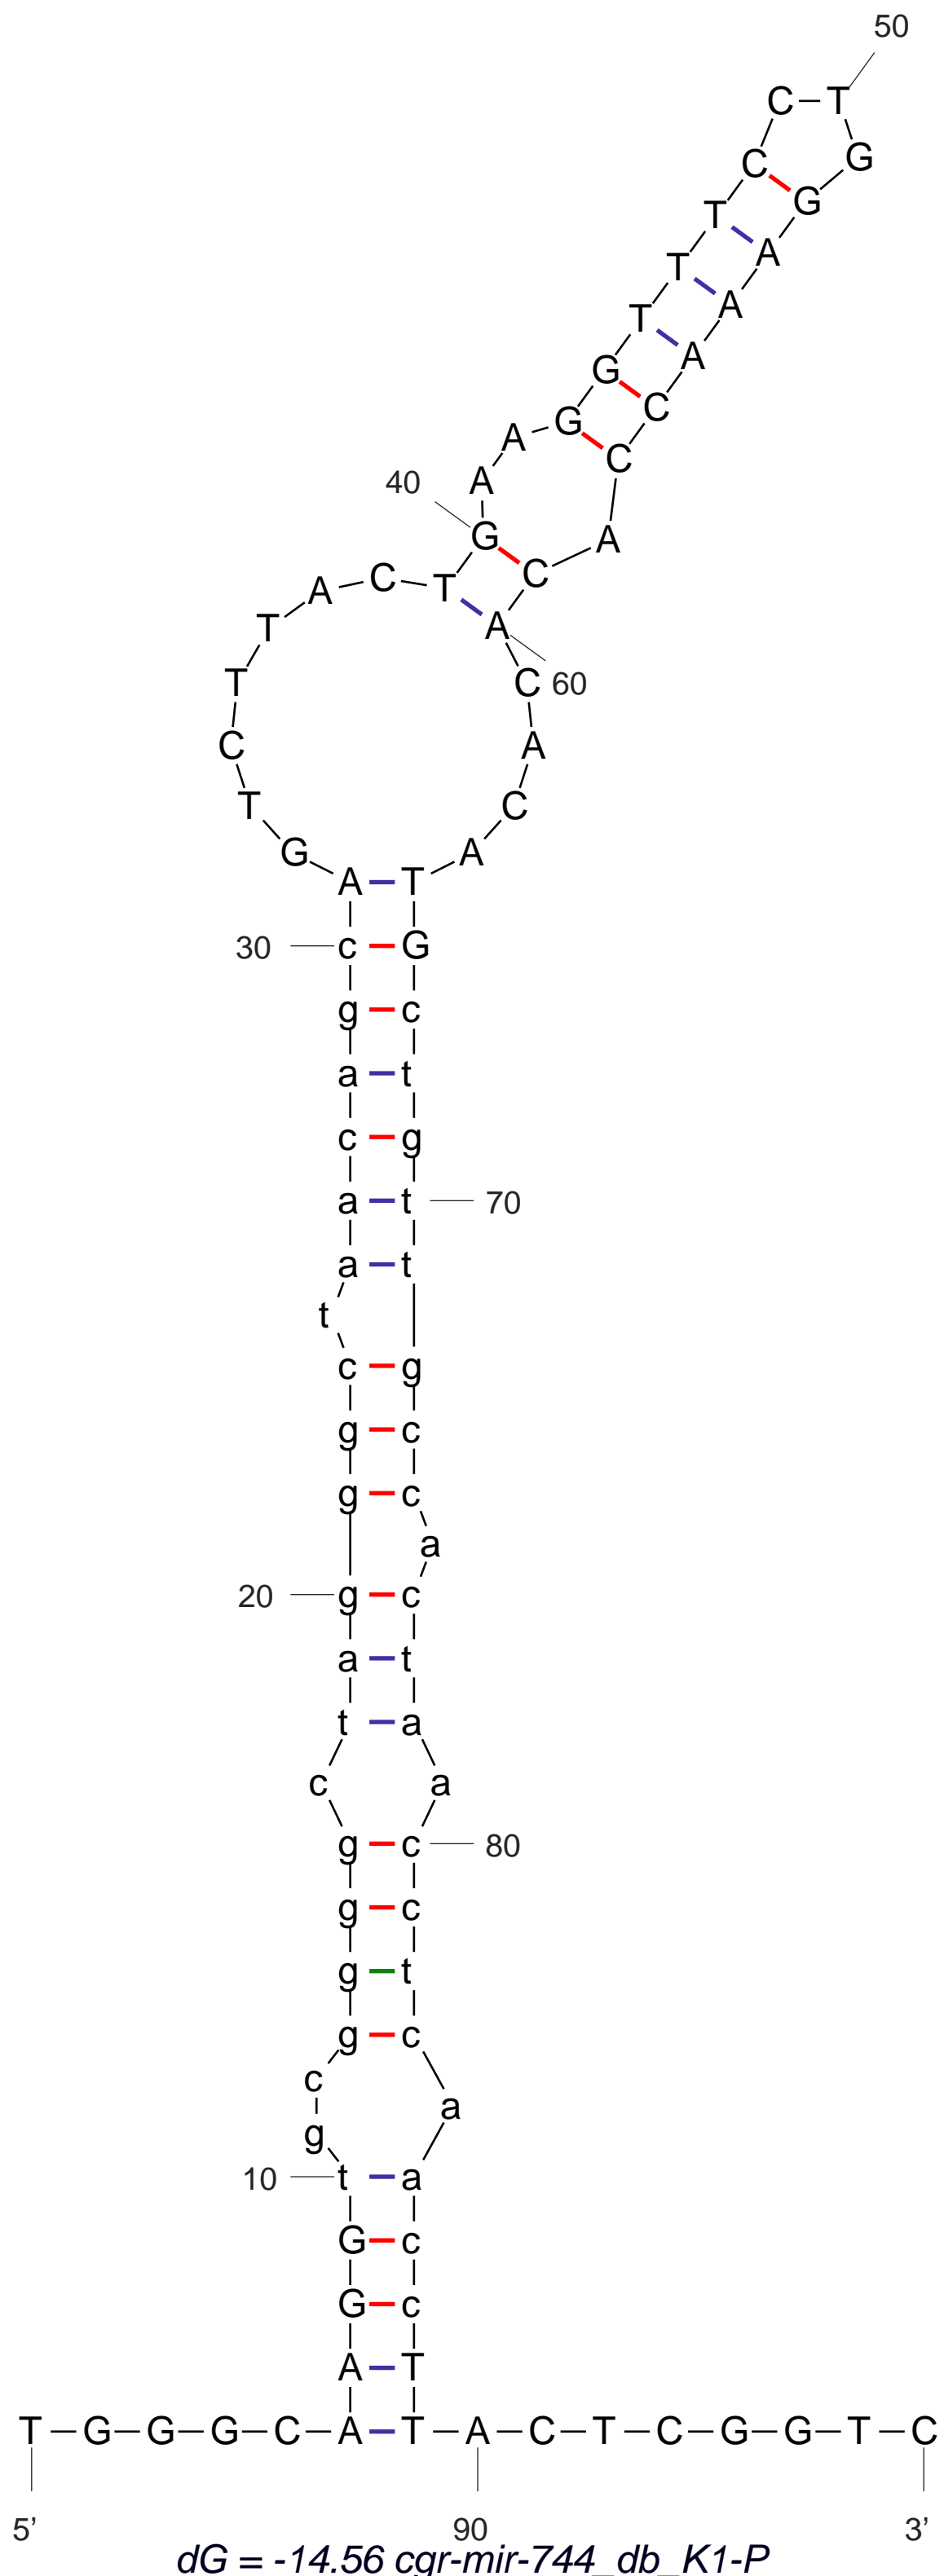

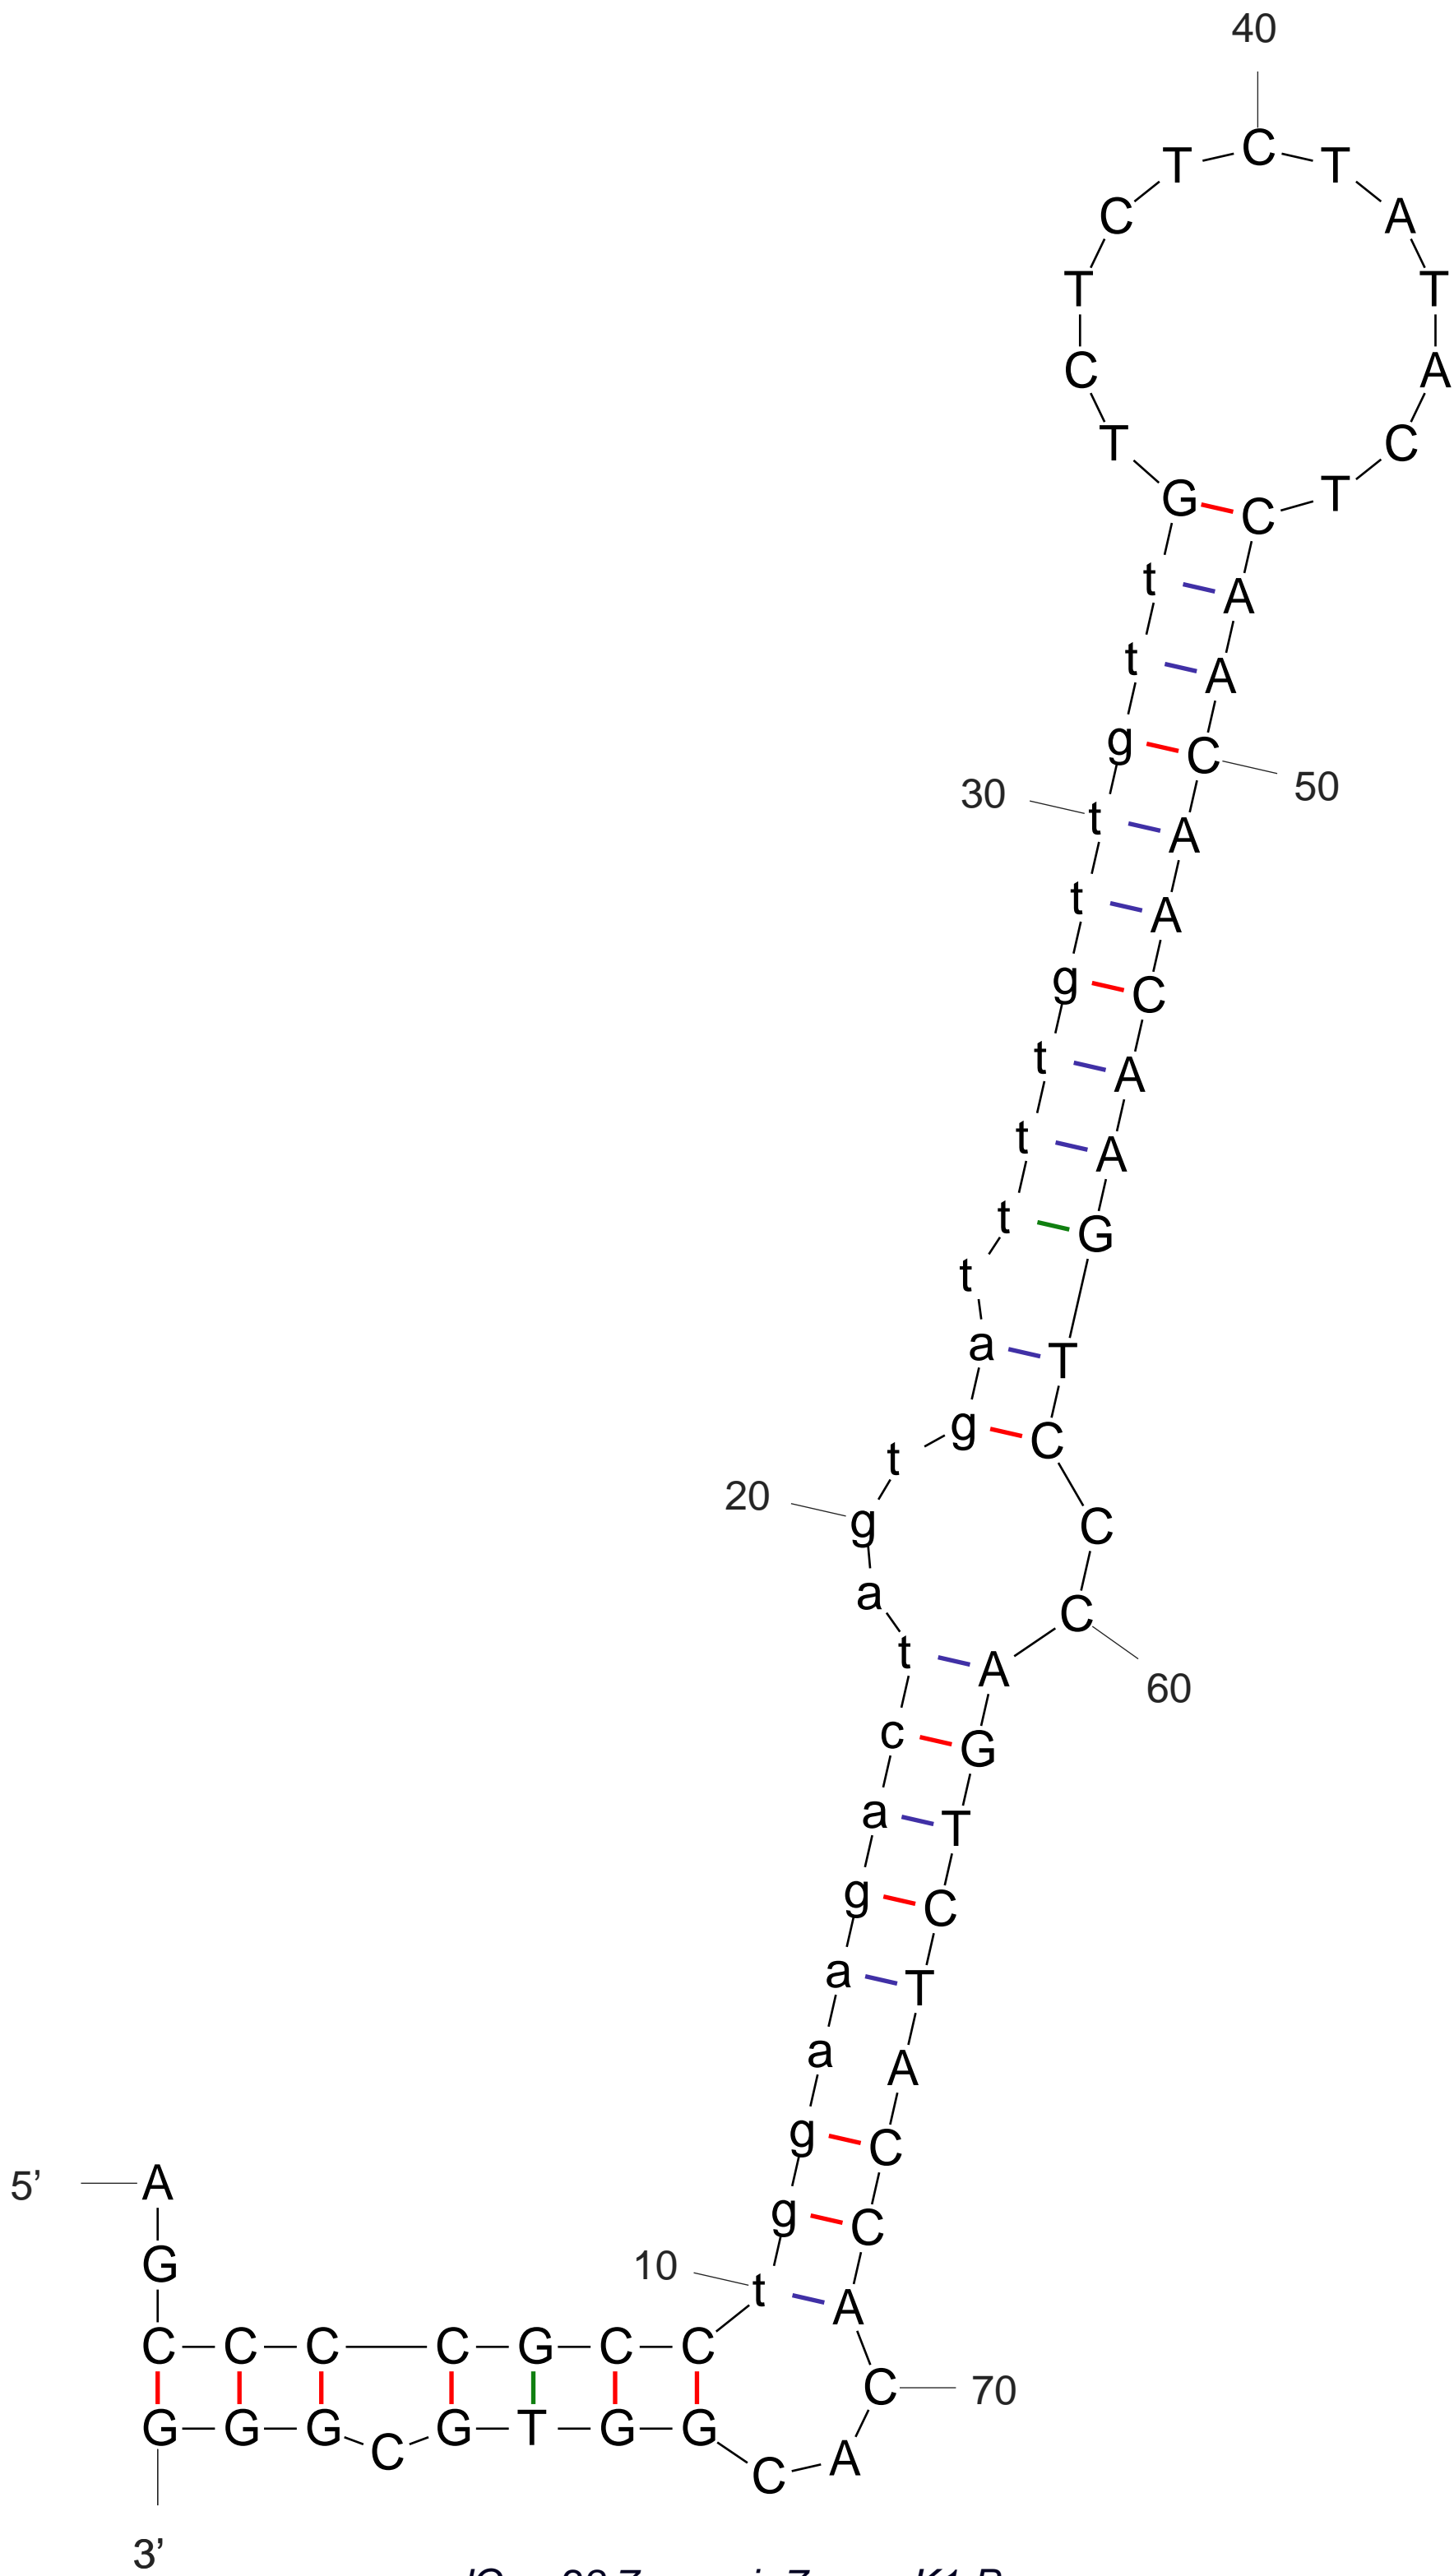

dG = -28.7 cgr-mir-7a\_ss\_K1-P



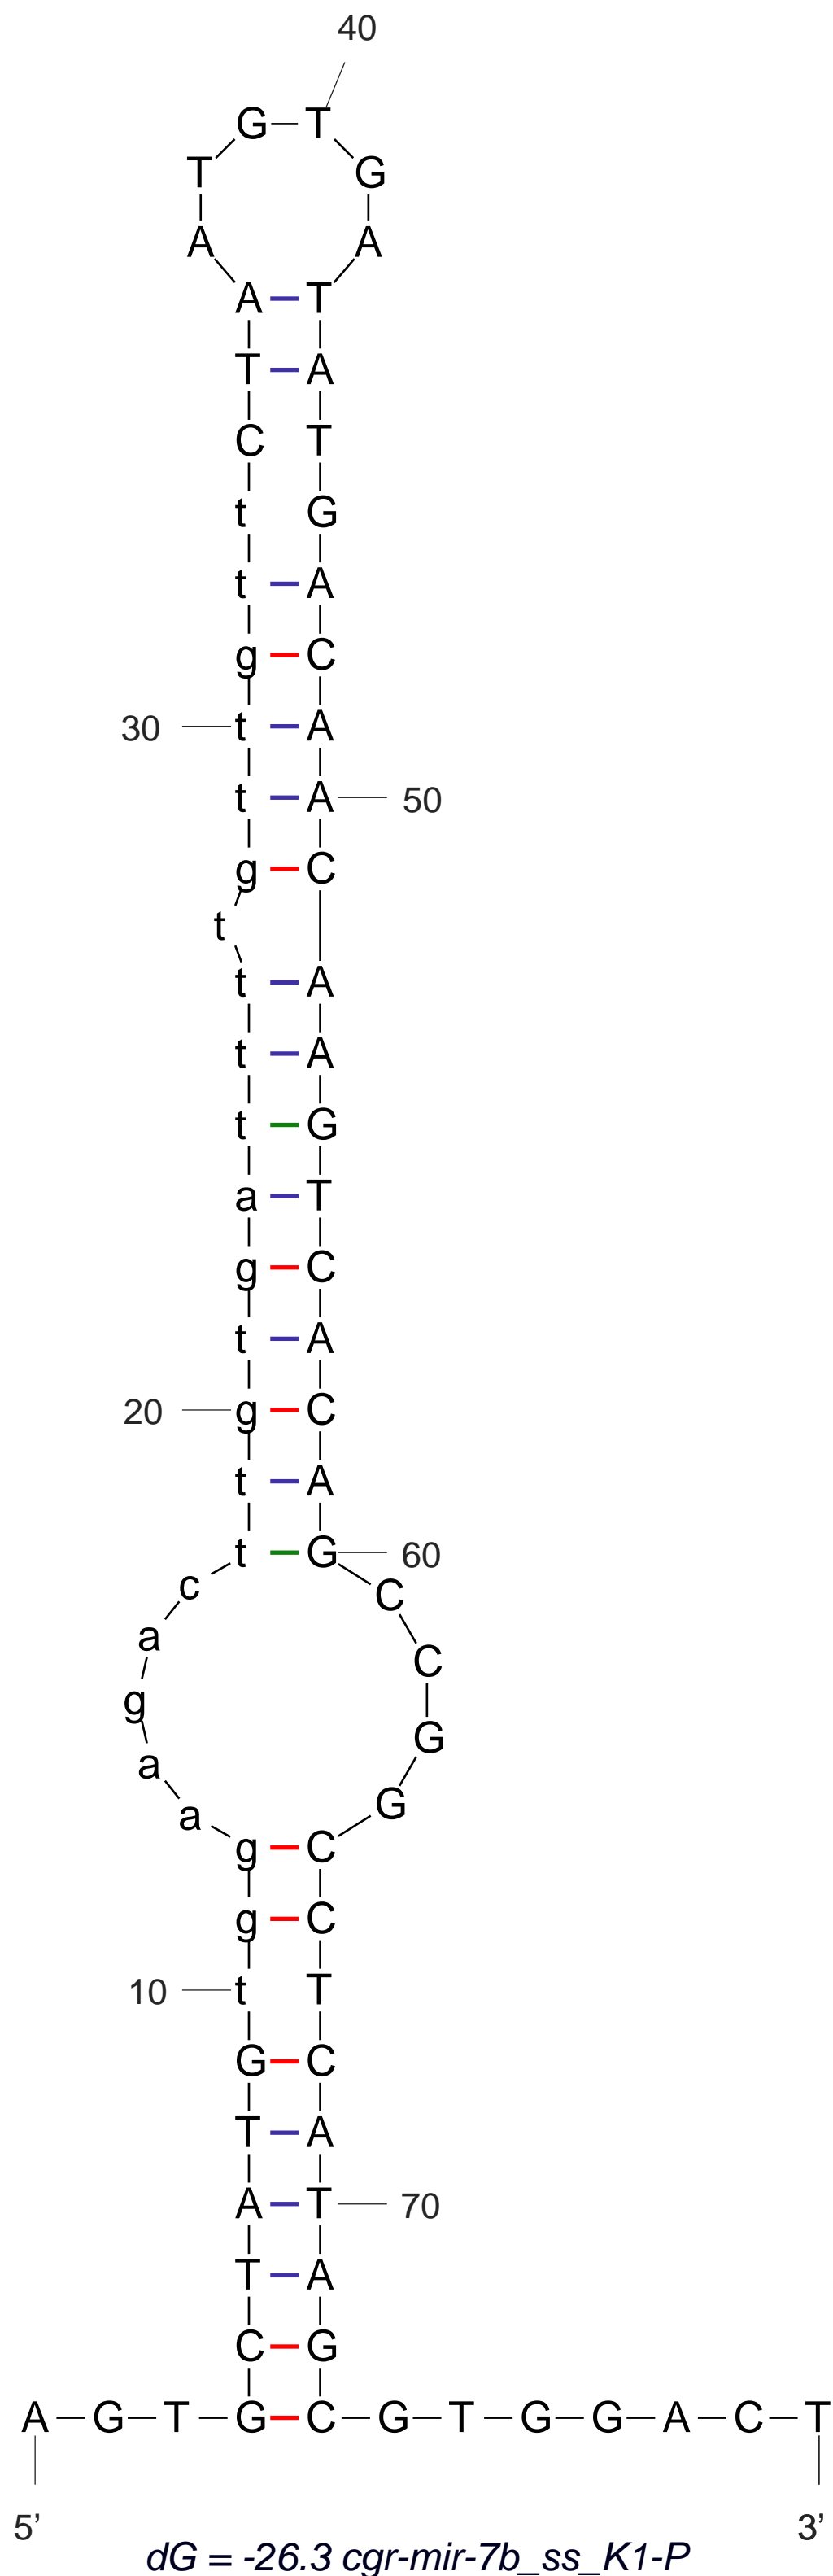

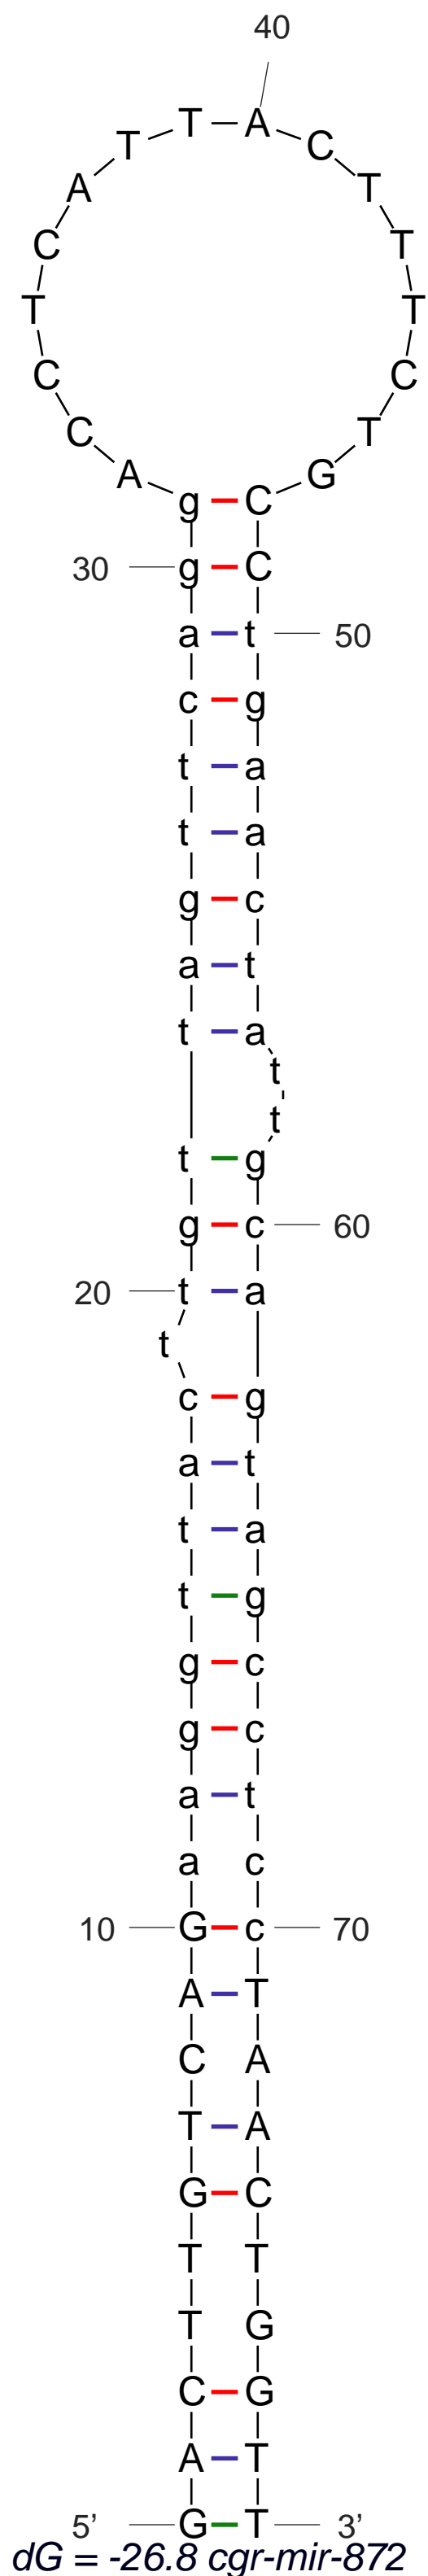

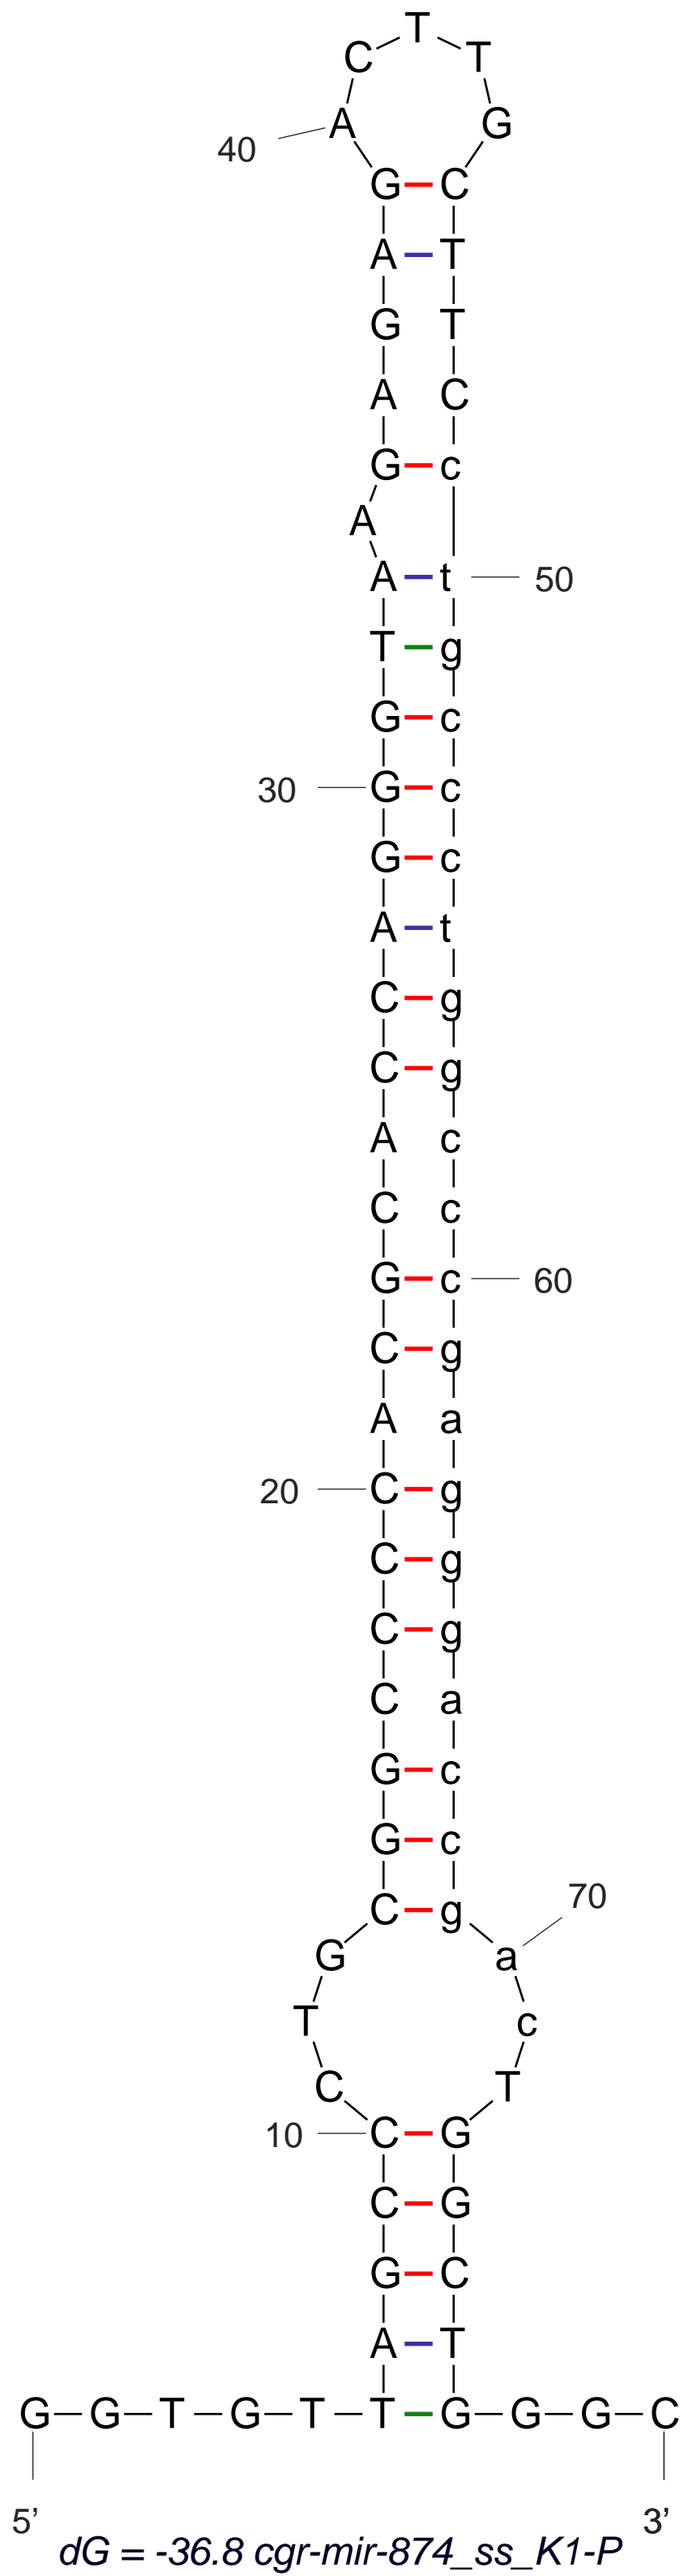



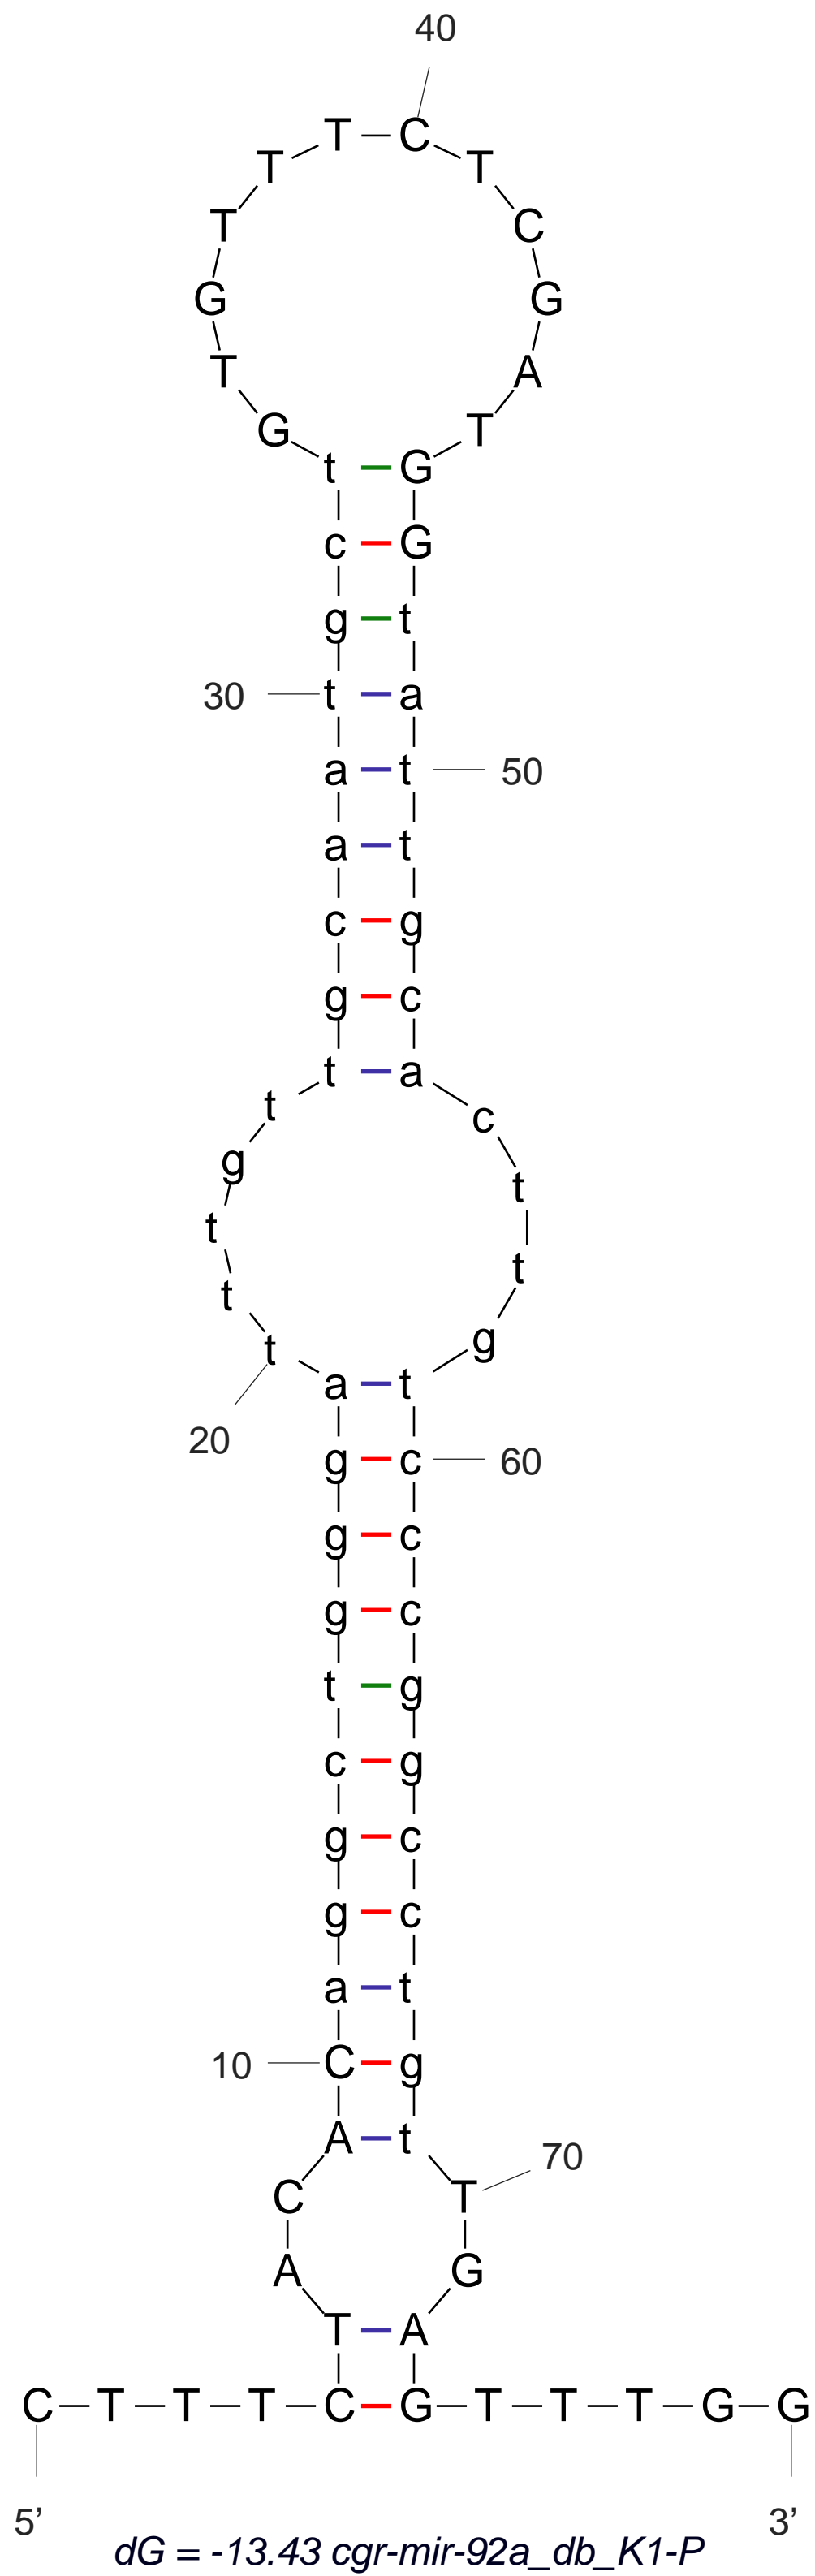



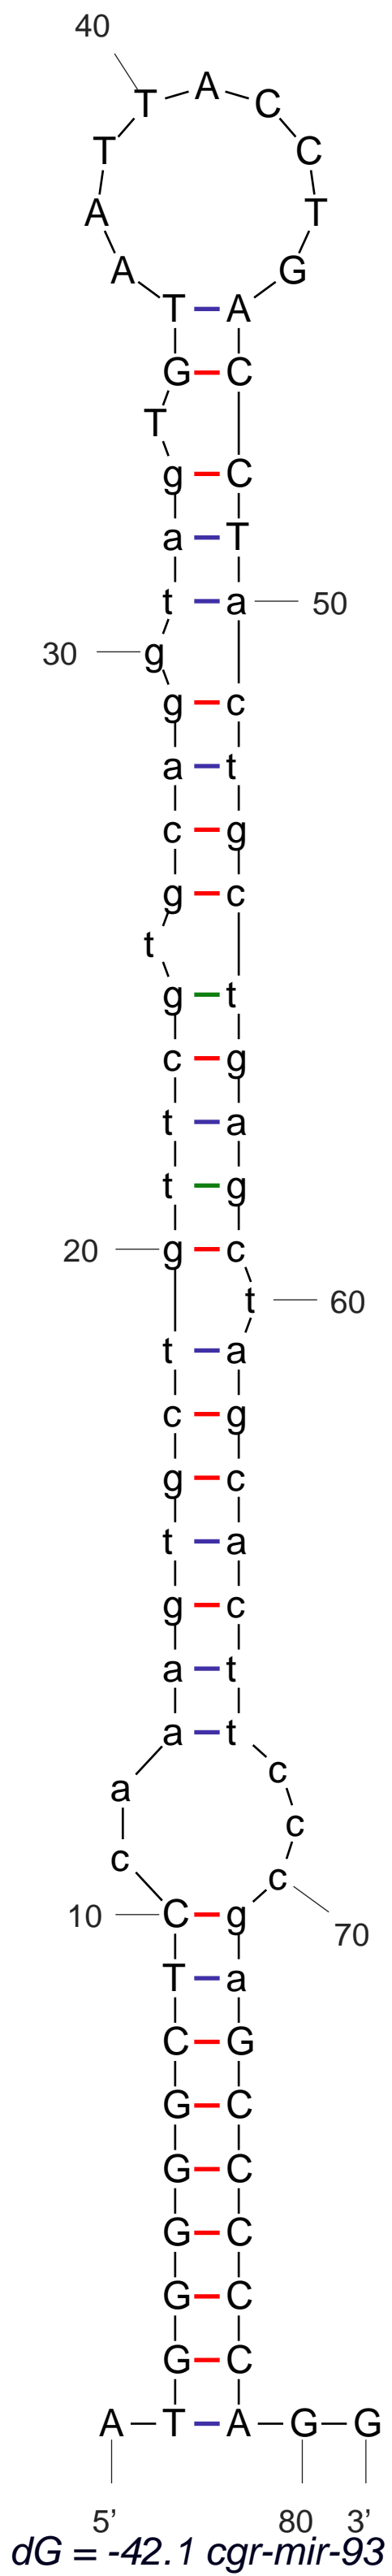

$dG = -42.1$  *cgr-mir-93*

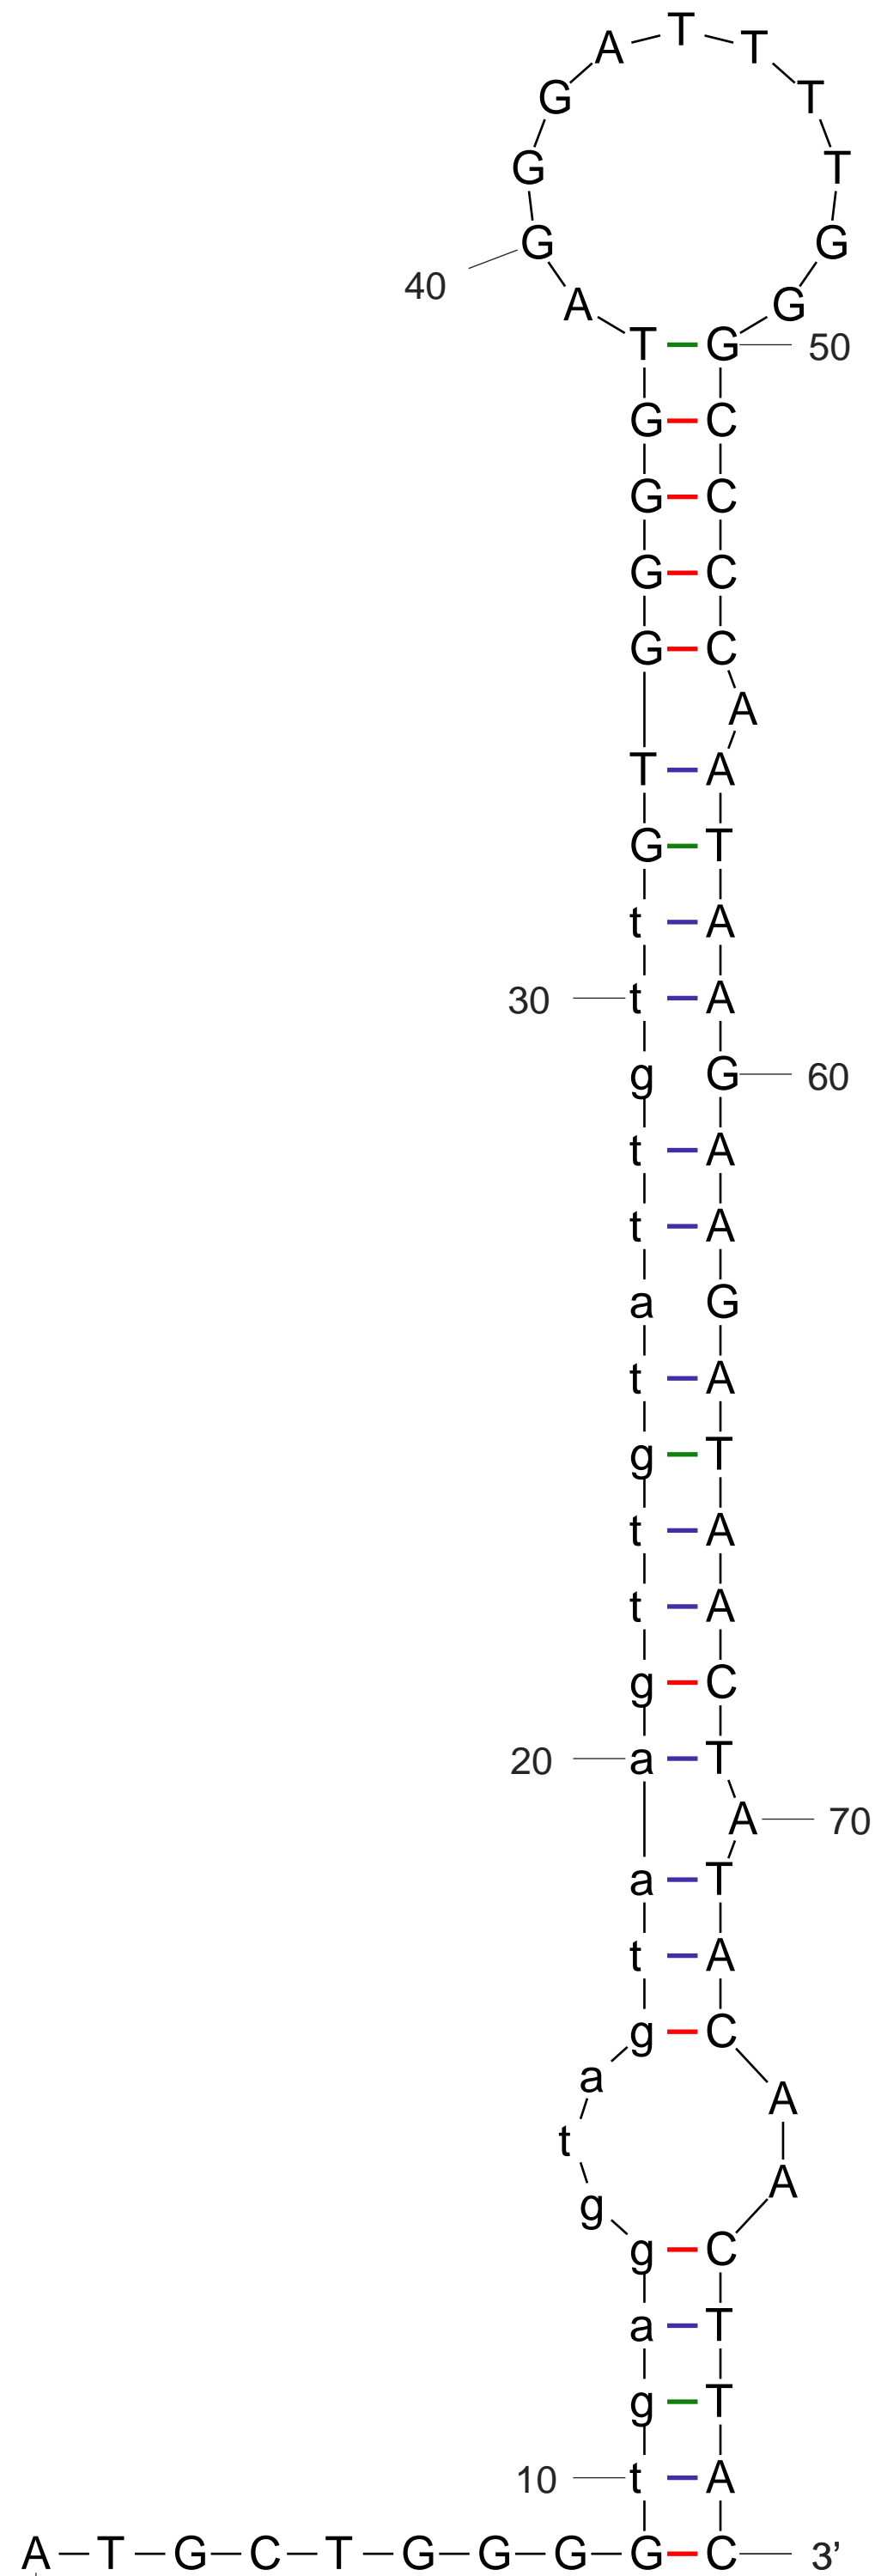

dG = -21.2 cgr-mir-98\_ss\_K1-P



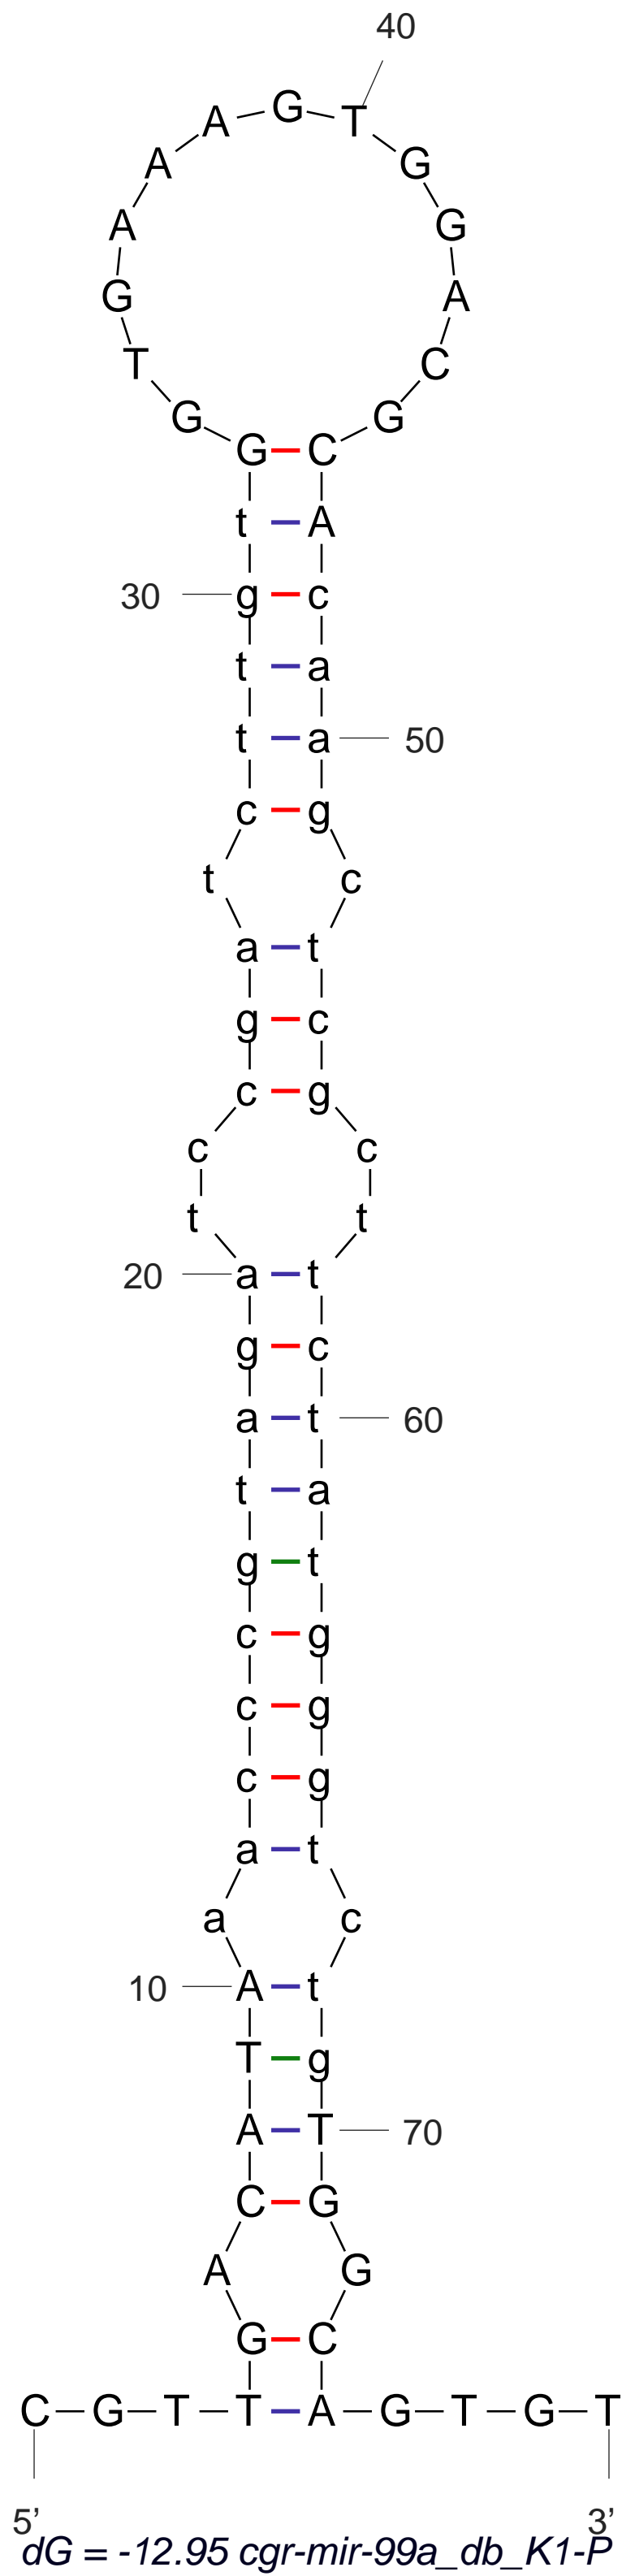

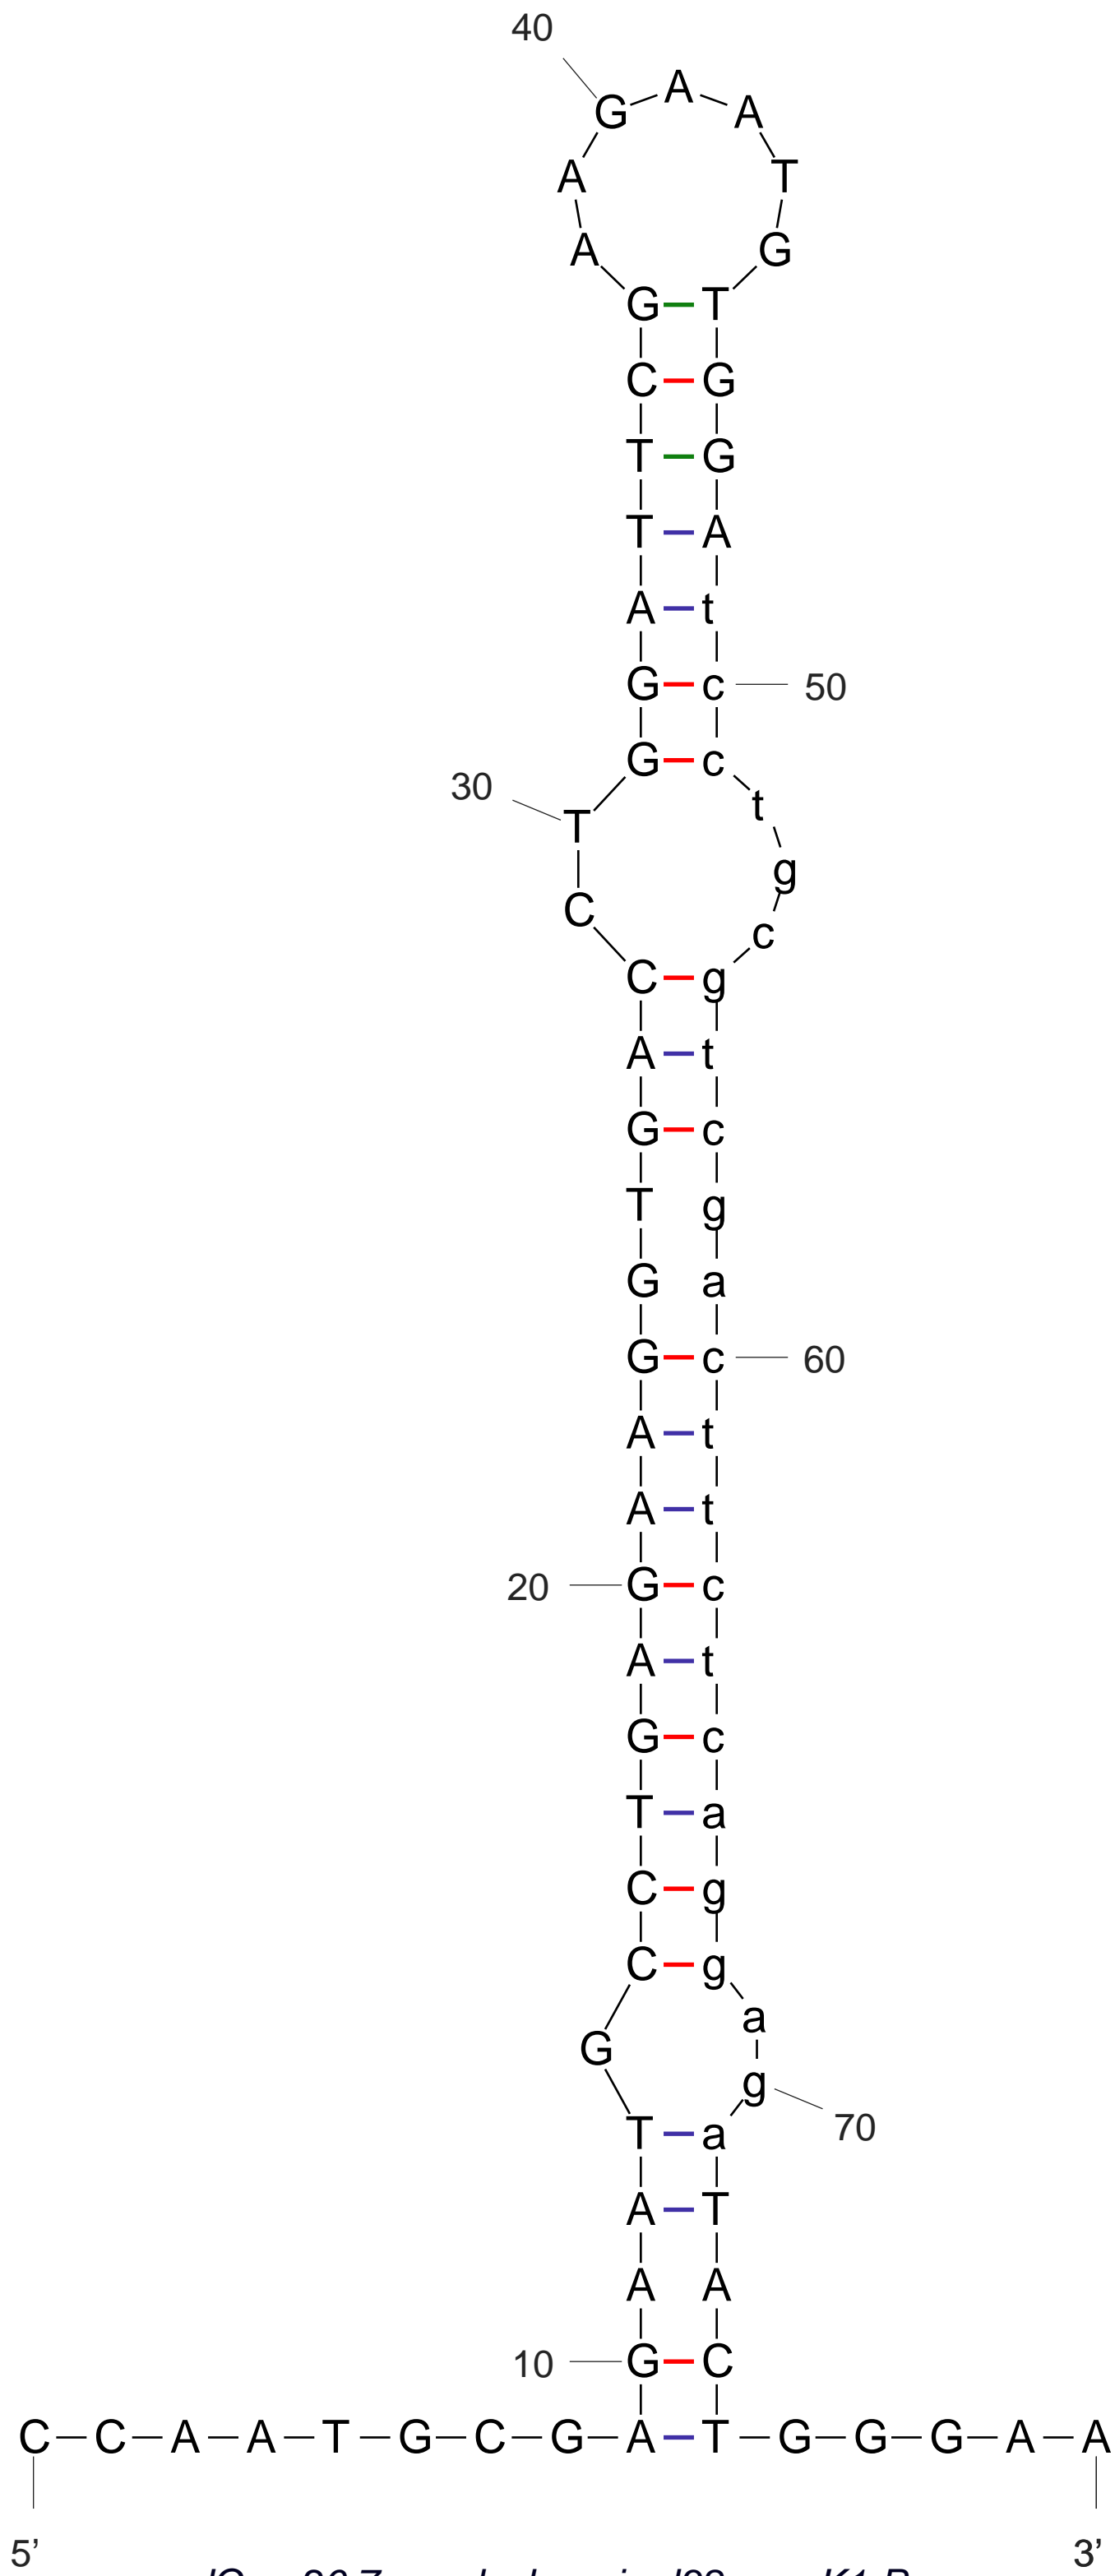

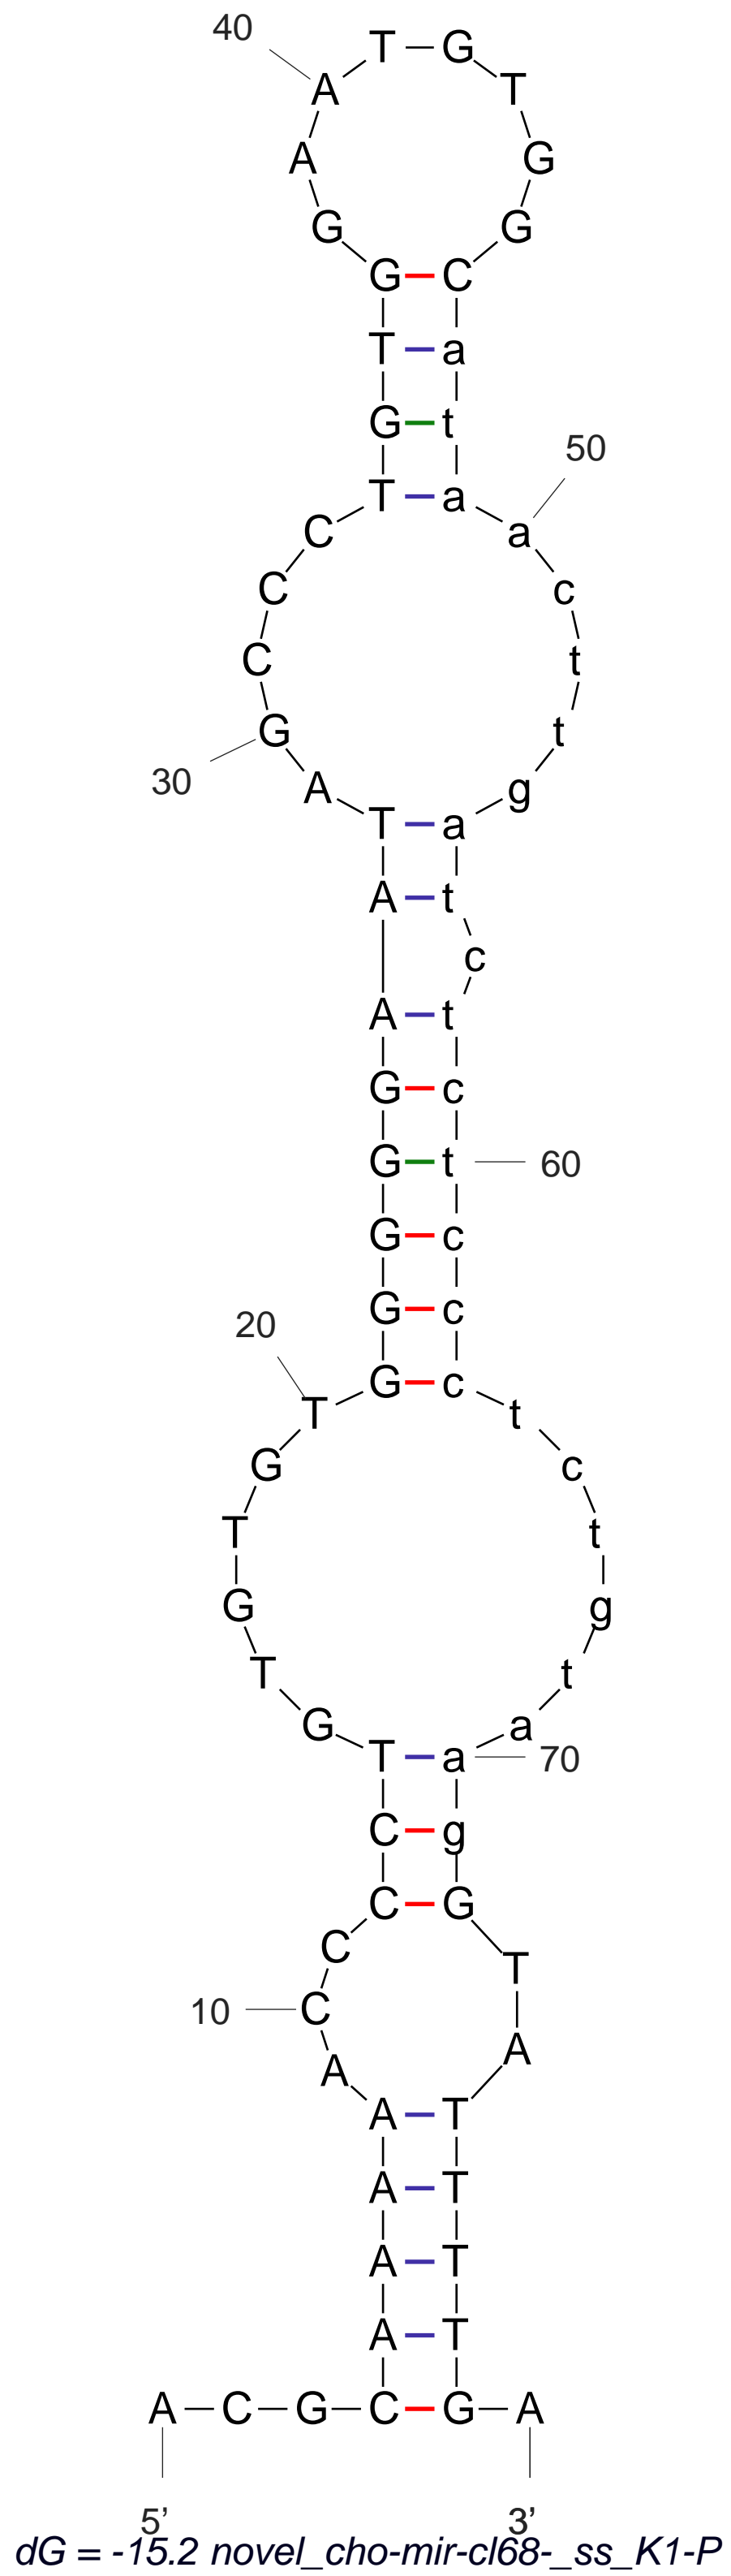

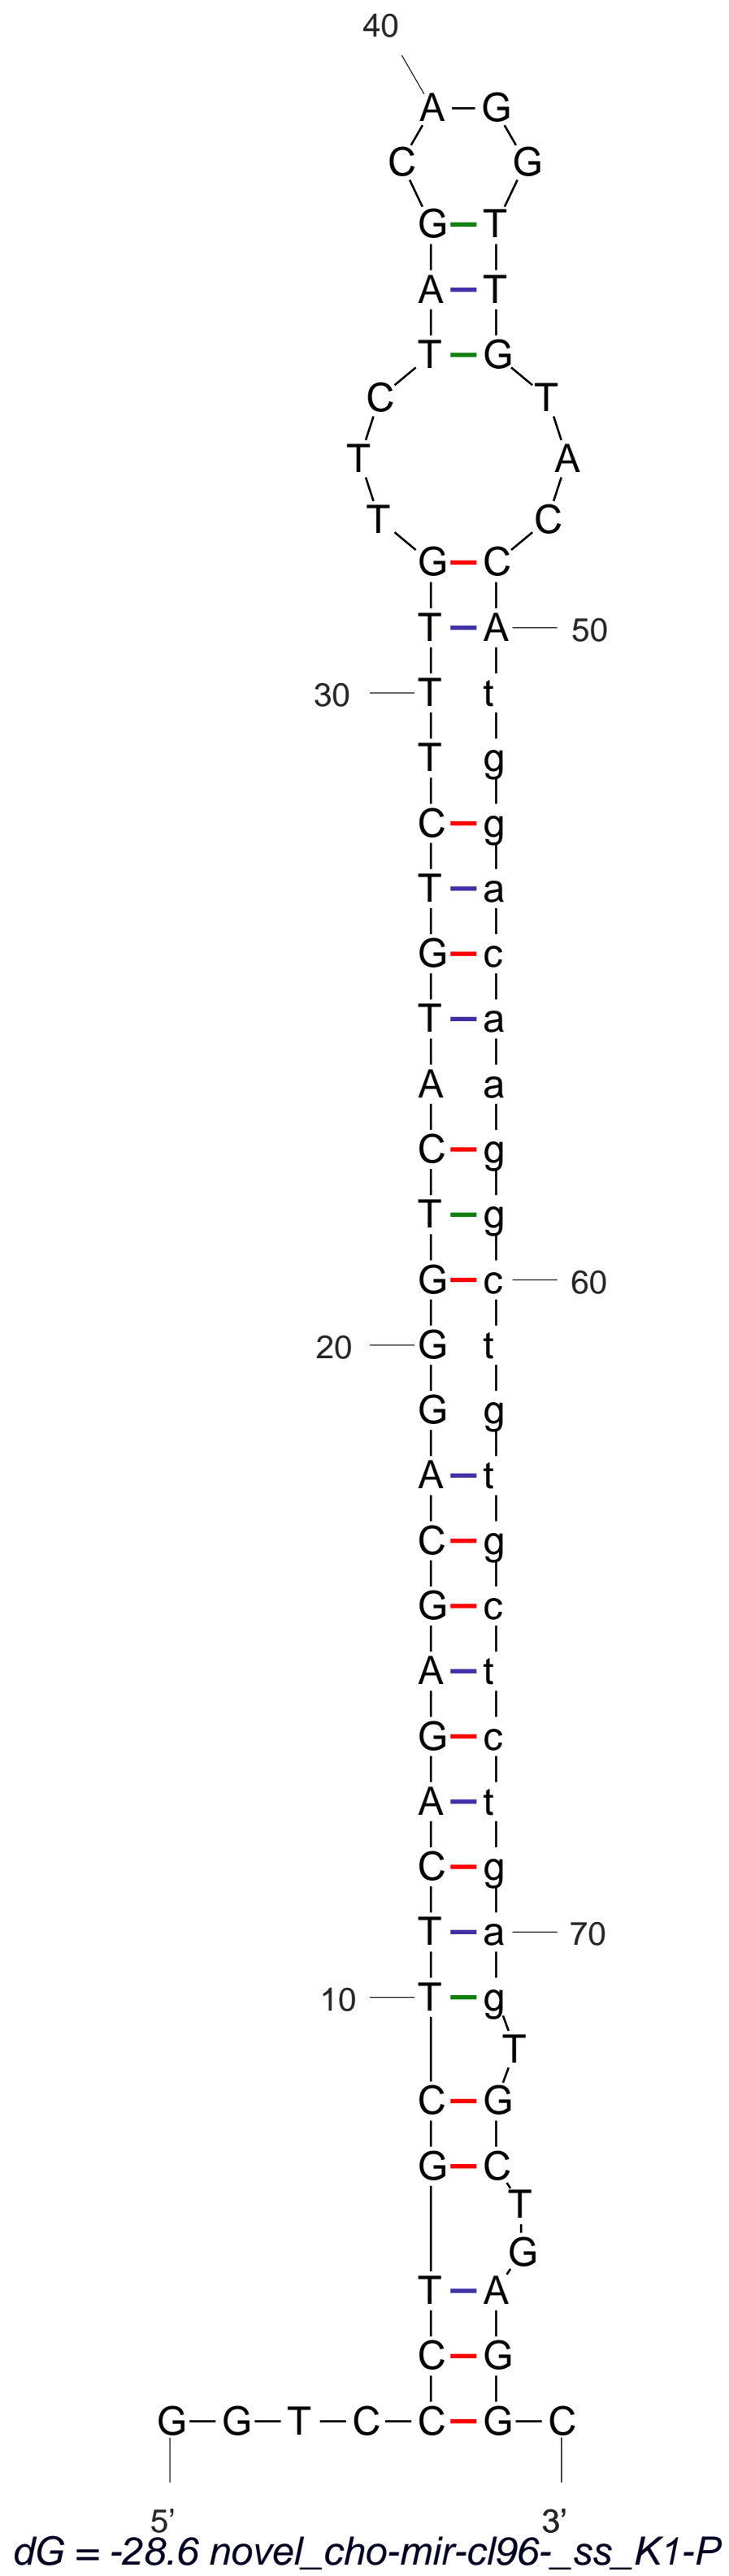

Supplement: mmc3.pdf [file mmc3.pdf]
